# Supplementary material for: A genome-wide identification of the miRNAome in response to salinity stress in date palm (Phoenix dactylifera L.)
Source: Front Plant Sci. 2015 Nov 5;6:946. doi: 10.3389/fpls.2015.00946 (PMC4633500; doi:10.3389/fpls.2015.00946)
Supplement: Supplementary file 1 [file Table1.XLSX]

## Sheet: Sheet1
Table S1. Conserved miRNA sequences identified from P. dactylifera leaves and roots and their corresponding precursors.
			Genome Location (precursor)			Mismatch						Number of reads						for the representative read (most abundant) in the cluster						miRbase information (rep: representative)							number of reads of 5' and 3'	number of reads of 5' or 3'			sequencing quality score							internal use only	UNAFold: hairpin structure prediction
MicrRNA	miRBase result	Mature Sequence (5’-3’)	strand	start	end	on miRbase	on genome	Chromosome number	Length of the mature miRNA	Length of the precursor	Minimal folding free energy	Count in the combined library	Control-Leaves	Control-Root	NaCl-Leaves	NaCl-Root	group	#copy of the miRNA	score(all) of the miRNA	score(mapped) of the miRNA	#error of the miRNA	group	genome_seq	#mir	mirIDs,	rep_mirID	rep_mirSeq	rep_miRID	rep_miRSeq	type	#reads(all for cluster)	#reads(all)	#reads(0err)	#reads(>0err)	score(all)	score(0err)	score(>0err)	score(mapped)	score(mapped,0err)	score(mapped,>0err)	#base_inLoop	flag	SS	#maxError(a spot in mature region)	#maxBiasedError (in mature region)	#biasedBulge (in mature region)	dG	#bp (in stem)	#bp (in mature region)
pda-miR390a	ppt-miR390a	AAGCUCAGGAGGGAUAGCGCC	-	138	277	0	0	PDK_30s1091631	21	140	-63.8	10.5	0	2.5	6	2	gp2a	20	783	783	0	gp2a	aaaaguaucgaagaauccguaAAGCuCAGGAGGGAuAGCGCCauggaugauaacaaggggacuguaaagaugaagcucaaaaagguuccauucaucuaaugCGCuAuCuAuCCuGAGuuuuauggcuucuuccuacuccc	56	ppt-MIR390b,ppt-MIR390a,gma-MIR390c,gma-MIR390g,gma-MIR390a,gma-MIR390f,gma-MIR390e,lja-MIR390b,lja-MIR390a,mtr-MIR390,hex-MIR390b,hex-MIR390a,ath-MIR390a,ath-MIR390b,bna-MIR390b,bna-MIR390c,bna-MIR390a,aly-MIR390a,aly-MIR390b,cpa-MIR390b,cpa-MIR390a,cme-MIR390c,cme-MIR390d,cme-MIR390a,cme-MIR390b,mes-MIR390,rco-MIR390b,rco-MIR390a,lus-MIR390c,lus-MIR390a,lus-MIR390b,lus-MIR390d,ghr-MIR390b,ghr-M…	ppt-MIR390a	catgatacaattacgAAGCTCAGGAGGGATAGCGCCattctctgttcttctctatcgacacttggtaaaccagcttgtgctagctatgggcagagatatggcgttatccattctgagctttgcaagtgtctcgtgct	ppt-miR390a	AAGCTCAGGAGGGATAGCGCC	5'	33	10.5	10.5	0	8295	8295	0	8295	8295	0	0	y	...((((..((((((.(((((((((((((((..((((((((..(((((((.......((((((.....((......)).....))))))..)))))))..))))))))..))))))))))))))).)))))).))))...	4	0	0	-63.8	48	18
pda-miR390a-3p_R-1_1ss8CT	gma-miR390a-3p_R-1_1ss8CT	CGCUAUCUAUCCUGAGUUU	-	138	277	0	0	PDK_30s1091631	19	140	-63.8	10.5	2	0.5	8	0	gp2a	4	680	680	0	gp2a	aaaaguaucgaagaauccguaAAGCuCAGGAGGGAuAGCGCCauggaugauaacaaggggacuguaaagaugaagcucaaaaagguuccauucaucuaaugCGCuAuCuAuCCuGAGuuuuauggcuucuuccuacuccc	56	ppt-MIR390b,ppt-MIR390a,gma-MIR390c,gma-MIR390g,gma-MIR390a,gma-MIR390f,gma-MIR390e,lja-MIR390b,lja-MIR390a,mtr-MIR390,hex-MIR390b,hex-MIR390a,ath-MIR390a,ath-MIR390b,bna-MIR390b,bna-MIR390c,bna-MIR390a,aly-MIR390a,aly-MIR390b,cpa-MIR390b,cpa-MIR390a,cme-MIR390c,cme-MIR390d,cme-MIR390a,cme-MIR390b,mes-MIR390,rco-MIR390b,rco-MIR390a,lus-MIR390c,lus-MIR390a,lus-MIR390b,lus-MIR390d,ghr-MIR390b,ghr-M…	gma-MIR390a	agaatctgtaAAGCTCAGGAGGGATAGCGCCatggatgatcttctcttcactcttgatcttctcttgCGCTATCCATCCTGAGTTTCatggcttctatcttcaca	gma-miR390a-3p	CGCTATCCATCCTGAGTTTC	3'	33	10.5	10	0.5	7229	6927	302	7209	6927	282	0	y	...((((..((((((.(((((((((((((((..((((((((..(((((((.......((((((.....((......)).....))))))..)))))))..))))))))..))))))))))))))).)))))).))))...	4	0	0	-63.8	48	18
pda-miR390a-3p_R-3_1ss18TA	bdi-miR390a-3p_R-3_1ss18TA	CGCUAUCUAUCCUGAGCA	+	9453	9591	0	0	PDK_30s769561	18	139	-63.1	3.5	0	2.5	1	0	gp2a	2	687	687	0	gp2a	aaaaguaugaaagaauccguaAAGCuCAGGAGGGAuAGCGCCauggaugauaaaaagggaacuguaaggaugaagcuccgaaggugccguucaucuauugCGCuAuCuAuCCuGAGCAuuaugguuucuuccuacucuc	56	ppt-MIR390b,ppt-MIR390a,gma-MIR390g,gma-MIR390a,gma-MIR390f,gma-MIR390e,gma-MIR390c,lja-MIR390b,lja-MIR390a,mtr-MIR390,hex-MIR390a,hex-MIR390b,ath-MIR390b,ath-MIR390a,bna-MIR390a,bna-MIR390b,bna-MIR390c,aly-MIR390b,aly-MIR390a,cpa-MIR390b,cpa-MIR390a,cme-MIR390d,cme-MIR390c,cme-MIR390a,cme-MIR390b,mes-MIR390,rco-MIR390a,rco-MIR390b,lus-MIR390b,lus-MIR390c,lus-MIR390d,lus-MIR390a,ghr-MIR390a,ghr-M…	bdi-MIR390a	ccaatcgagatcggtaaggaacaatccttgAAGCTCAGGAGGGATAGCGCCtaggttcactgcaaccaacaagagaaccggccatcgatatatacatatatatgtcctcgatcgaccgatcgatctcttgctggttccgtcgatctgttcgtccgaagCGCTATCTATCCTGAGCTCCAcggttcgttcgttcttaccatgcccacaca	bdi-miR390a-3p	CGCTATCTATCCTGAGCTCCA	3'	26	3.5	3.5	0	2276	2276	0	2276	2276	0	0	y	...((((.(.(((((.((((((.((((((((..((((((((.((((((((......((..(((....(((......)))...))).))..)))))))).))))))))..)))))))).)))))).)))))).))))...	4	0	0	-63.1	48	17
pda-miR390a	ppt-miR390a	AAGCUCAGGAGGGAUAGCGCC	+	9453	9591	0	0	PDK_30s769561	21	139	-63.1	10.5	0	2.5	6	2	gp2a	20	783	783	0	gp2a	aaaaguaugaaagaauccguaAAGCuCAGGAGGGAuAGCGCCauggaugauaaaaagggaacuguaaggaugaagcuccgaaggugccguucaucuauugCGCuAuCuAuCCuGAGCAuuaugguuucuuccuacucuc	56	ppt-MIR390b,ppt-MIR390a,gma-MIR390g,gma-MIR390a,gma-MIR390f,gma-MIR390e,gma-MIR390c,lja-MIR390b,lja-MIR390a,mtr-MIR390,hex-MIR390a,hex-MIR390b,ath-MIR390b,ath-MIR390a,bna-MIR390a,bna-MIR390b,bna-MIR390c,aly-MIR390b,aly-MIR390a,cpa-MIR390b,cpa-MIR390a,cme-MIR390d,cme-MIR390c,cme-MIR390a,cme-MIR390b,mes-MIR390,rco-MIR390a,rco-MIR390b,lus-MIR390b,lus-MIR390c,lus-MIR390d,lus-MIR390a,ghr-MIR390a,ghr-M…	ppt-MIR390a	catgatacaattacgAAGCTCAGGAGGGATAGCGCCattctctgttcttctctatcgacacttggtaaaccagcttgtgctagctatgggcagagatatggcgttatccattctgagctttgcaagtgtctcgtgct	ppt-miR390a	AAGCTCAGGAGGGATAGCGCC	5'	26	10.5	10.5	0	8295	8295	0	8295	8295	0	0	y	...((((.(.(((((.((((((.((((((((..((((((((.((((((((......((..(((....(((......)))...))).))..)))))))).))))))))..)))))))).)))))).)))))).))))...	4	0	0	-63.1	48	17
pda-miR156i-3p_R-3_1ss6AT	mtr-miR156i-3p_R-3_1ss6AT	UGCUCUCUUCUCUUUCUGUC	-	37429	37569	0	0	PDK_30s1120391	20	141	-66.9	4.5	0	0.5	4	0	gp2a	3	769	769	0	gp2a	aaaggguggaacccuagaugaaagaagAuGACAGAAGAGAGAGAGCACagccugacauuggcgaaagaagcggguucgcucuuggggggauuguGCuCuCuuCuCuuuCuGuCaucaccgucucuagaguuuuugccugcg	46	pta-MIR156b,pta-MIR156a,ppt-MIR529d,ppt-MIR529f,ppt-MIR529e,gma-MIR156w,gma-MIR156h,gma-MIR156k,mtr-MIR156i,vun-MIR156a,han-MIR156a,han-MIR156b,har-MIR156a,har-MIR156c,hci-MIR156b,cpa-MIR156a,cpa-MIR156b,cme-MIR156j,cme-MIR156c,cme-MIR156h,cme-MIR156g,mes-MIR156f,mes-MIR156e,rco-MIR156b,dpr-MIR156a,lus-MIR156g,tcc-MIR156g,mdm-MIR156d,mdm-MIR156l,ptc-MIR156k,stu-MIR156f,vvi-MIR156a,bdi-MIR529,osa-…	mtr-MIR156i	gatatTGACAGAAGAGAGTGAGCACatgctgcagtgattgtatgatagcatacaattcttggtgcgTGCTCACTTCTCTTTCTGTCATCttat	mtr-miR156i-3p	TGCTCACTTCTCTTTCTGTCATC	3'	75	4.5	2	2.5	3542	1537	2005	3443	1537	1906	0	y	...(((..((((.(((((.((.....(((((((((((((((((((((((((((..((..((((((.........))))))..))..))).))))))))))).))))).))))))))....))))))).))).)..)))...	1	1	2	-66.9	49	21
pda-miR156a_L+1	gma-miR156a_L+1	AUGACAGAAGAGAGUGAGCAC	-	37429	37569	0	1	PDK_30s1120391	21	141	-66.9	59	11.5	2	44.5	1	gp2a	25	710	677	1	gp2a	aaaggguggaacccuagaugaaagaagAuGACAGAAGAGAGAGAGCACagccugacauuggcgaaagaagcggguucgcucuuggggggauuguGCuCuCuuCuCuuuCuGuCaucaccgucucuagaguuuuugccugcg	46	pta-MIR156b,pta-MIR156a,ppt-MIR529d,ppt-MIR529f,ppt-MIR529e,gma-MIR156w,gma-MIR156h,gma-MIR156k,mtr-MIR156i,vun-MIR156a,han-MIR156a,han-MIR156b,har-MIR156a,har-MIR156c,hci-MIR156b,cpa-MIR156a,cpa-MIR156b,cme-MIR156j,cme-MIR156c,cme-MIR156h,cme-MIR156g,mes-MIR156f,mes-MIR156e,rco-MIR156b,dpr-MIR156a,lus-MIR156g,tcc-MIR156g,mdm-MIR156d,mdm-MIR156l,ptc-MIR156k,stu-MIR156f,vvi-MIR156a,bdi-MIR529,osa-…	gma-MIR156k	gaaatTGACAGAAGAGAGTGAGCACacagaggcacttggtatagtatatatactattgcttttgcgtgctcacttctctttctgtcaacttc	gma-miR156a	TGACAGAAGAGAGTGAGCAC	5'	75	59	3.5	55.5	42066	2334.5	39731.5	40207.5	2334.5	37873	0	y	...(((..((((.(((((.((.....(((((((((((((((((((((((((((..((..((((((.........))))))..))..))).))))))))))).))))).))))))))....))))))).))).)..)))...	1	1	2	-66.9	49	21
pda-miR171h_L-1R+1_1ss2TC	lus-miR171h_L-1R+1_1ss2TC	CGAGCCGAACCAAUAUCACUC	+	218263	218437	0	1	PDK_30s925071	21	175	-71.6	259.5	9	152	59.5	39	gp2a	446	786	747	1	gp2a	aaagguggugaucagagagauggaauguagguggagagaugacaugauauugggucggcucagccagcuucaacucaaggaggaucuugcaucucuaguucuucgggaggcCGAGCCGAACCAAuAuCACuucuucucuuagccgccauggccuuuuguggaucaacucaccaaa	10	lus-MIR171h,mdm-MIR171i,nta-MIR479b,stu-MIR479,vvi-MIR479,osa-MIR171h,sbi-MIR171f,sbi-MIR171e,zma-MIR171h,zma-MIR171k,	lus-MIR171h	gggccgttggagaaagtagacacgacgtggtattggttgcggctcgtcgatctcggacggctttgaccgtcgctccgATGAGCCGAACCAATATCACTcttgtatgcttctttccgttcgttttcc	lus-miR171h	ATGAGCCGAACCAATATCACT	3'	514	259.5	34.5	225	201102	24400	176702	192326	24400	167926	0	y	...((((((((((...((((.((.(((..(((..(((((.((..(((((((((.(((((((.(((.............(((((........)))))..(((....)))))).))))))).)))))))))..)).)))))..)))..)))..))))))...))))).).))))...	4	0	0	-71.6	48	17
pda-miR396a-5p_L-1R-1_1ss2CT	bdi-miR396a-5p_L-1R-1_1ss2CT	UCACAGGCUUUCUUGAACU	+	41120	41243	0	0	PDK_30s1094891	19	124	-56.9	3200	355	307	2470	68	gp2a	4870	703	703	0	gp2a	aacaagauucuggacaugucuuCACAGGCuuuCuuGAACuaugaacuuguuuggguuuaucgcaagaaccgcaccaaugguugauaGuuCAAGAAAGuCAGuggaagacaugacagaucuucau	12	bdi-MIR396b,bdi-MIR396a,osa-MIR396e,osa-MIR396f,osa-MIR396g,osa-MIR396d,osa-MIR396h,sbi-MIR396e,sbi-MIR396d,zma-MIR396c,zma-MIR396d,far-MIR396,	bdi-MIR396a	gcgcggctcaattacaggttgcggccatgctcTCCACAGGCTTTCTTGAACTGtgaactcgtgcgcctagcctgctagctgctcaattcgatctgtcatcctcggttcgattcgatctgaattgcttgtatatgatatgatgtgccttgttgatgGTTCAAGAAAGTCCTTGGAAAacatggccgccgcctctttcccctgctggctta	bdi-miR396a-5p	TCCACAGGCTTTCTTGAACTG	5'	5722	3200	3139	61	2216246	2.17284e+06	43402.5	2.21422e+06	2.17284e+06	41379	0	y	...((((.((((..(((((((((((.((((((((((((((((.((((...((((((...((....))...)).)))).)))).)))))))))))))))).))).)))))))).))))))))...	2	1	1	-56.9	47	18
pda-miR396a-3p_R-6_1ss15TG	bdi-miR396a-3p_R-6_1ss15TG	GUUCAAGAAAGUCCG	+	41120	41243	0	1	PDK_30s1094891	15	124	-56.9	23	4	1	18	0	gp2a	11	538	499	1	gp2a	aacaagauucuggacaugucuuCACAGGCuuuCuuGAACuaugaacuuguuuggguuuaucgcaagaaccgcaccaaugguugauaGuuCAAGAAAGuCAGuggaagacaugacagaucuucau	12	bdi-MIR396b,bdi-MIR396a,osa-MIR396e,osa-MIR396f,osa-MIR396g,osa-MIR396d,osa-MIR396h,sbi-MIR396e,sbi-MIR396d,zma-MIR396c,zma-MIR396d,far-MIR396,	bdi-MIR396a	gcgcggctcaattacaggttgcggccatgctcTCCACAGGCTTTCTTGAACTGtgaactcgtgcgcctagcctgctagctgctcaattcgatctgtcatcctcggttcgattcgatctgaattgcttgtatatgatatgatgtgccttgttgatgGTTCAAGAAAGTCCTTGGAAAacatggccgccgcctctttcccctgctggctta	bdi-miR396a-3p	GTTCAAGAAAGTCCTTGGAAA	3'	5722	23	0	23	14180	0	14180	13207	0	13207	0	y	...((((.((((..(((((((((((.((((((((((((((((.((((...((((((...((....))...)).)))).)))).)))))))))))))))).))).)))))))).))))))))...	2	1	1	-56.9	47	18
pda-miR172a	gma-miR172a	AGAAUCUUGAUGAUGCUGCAU	+	25513	25663	0	0	PDK_30s1145531	21	151	-68.7	49.5	2	1	46	0.5	gp2a	59	784	784	0	gp2a	aacagucacuguuugcugguGuGGCAuCAuCAAGAuuCACaagcucuugcggauaaagcuccacucaauucugaggguuuugaugcucggaagagagguugaaagagagaugAGAAuCuuGAuGAuGCuGCAucggcaauaaaugacuauu	132	gma-MIR172b,gma-MIR172f,gma-MIR172a,gma-MIR172h,gma-MIR172g,gma-MIR172j,gma-MIR172i,gma-MIR172d,gma-MIR172k,gma-MIR172c,gma-MIR172l,gma-MIR172e,aau-MIR172,lja-MIR172b,lja-MIR172c,lja-MIR172a,mtr-MIR172c,mtr-MIR172b,mtr-MIR172d,vun-MIR172,cca-MIR172,ath-MIR172a,ath-MIR172b,ath-MIR172c,ath-MIR172d,ath-MIR172e,bna-MIR172a,bna-MIR172d,bna-MIR172b,bna-MIR172c,bra-MIR172b,bra-MIR172a,aly-MIR172b,aly-MI…	gma-MIR172j	gcaggtGCAGCAGCATCAAGATTCACAcacagattccacctccttgggggagtgtttaggtgctgAGAATCTTGATGATGCTGCATcagc	gma-miR172a	AGAATCTTGATGATGCTGCAT	3'	111	49.5	49.5	0	38056.5	38056.5	0	38056.5	38056.5	0	0	y	...(((((....(((((((((..(((((((((((((((.((..(((((..(((......))).(((..(((((((..........)))))))..))).....)))))...)).)))))))))))))))..)))))))))....)))))...	4	0	0	-68.7	36	17
pda-miR172b-5p	gma-miR172b-5p	GUAGCAUCAUCAAGAUUCAC	-	30038	30156	0	0	PDK_30s753791	20	119	-54.8	4	0	1.5	2.5	0	gp2a	3	657	657	0	gp2a	aacagucgguguuugcggguGuAGCAuCAuCAAGAuuCACaugggcugggcgauccgagaucgugacauggucccaAAuGGGAAuCCuGAuGAuGCuGCAucagcaauaagcgacuaua	22	gma-MIR172b,gma-MIR172f,gma-MIR172a,aau-MIR172,lja-MIR172b,mtr-MIR172c,mtr-MIR172b,vun-MIR172,bna-MIR172c,cpa-MIR172b,ssl-MIR172,lus-MIR172a,tcc-MIR172c,tcc-MIR172e,ppe-MIR172a,sly-MIR172b,nta-MIR172h,nta-MIR172e,nta-MIR172f,nta-MIR172i,nta-MIR172c,nta-MIR172d,	gma-MIR172a	ttaacagtcgttatttgcggatGTAGCATCATCAAGATTCACatgcaagcgcaggtggtgggtgggacttgatgcaatctaagtgctgtgccagccaagccataggtcttttggaactgAGAATCTTGATGATGCTGCATcagccataaacgacttcac	gma-miR172b-5p	GTAGCATCATCAAGATTCAC	5'	14	4	3.5	0.5	2905.5	2521.5	384	2885	2521.5	363.5	0	y	...(((((....((((.(((((((((((((((.(((((.(((((((((.((((((...))))))..)..)))))...))).))))).))))))))))))))).))))....)))))...	2	0	0	-54.8	44	18
pda-miR156c-3p_L-1_2ss5TC9CT	mtr-miR156c-3p_L-1_2ss5TC9CT	GCUCACUUUCUAUCUGUCACC	+	7423	7520	0	0	PDK_30s987101	21	98	-51.5	5	0	3	0	2	gp2a	2	807	807	0	gp2a	aauggaggCuGACAGAAGAGAGuGAGCACacguggugcuuucuugcaugagucgaugcucgaaacuaugcguGCuCACuuuCuAuCuGuCACCcccca	165	ppt-MIR156b,ppt-MIR156c,ppt-MIR156a,smo-MIR156a,smo-MIR156d,gma-MIR156a,gma-MIR156u,gma-MIR156h,gma-MIR156v,gma-MIR156x,gma-MIR156o,gma-MIR156q,gma-MIR156s,gma-MIR156w,gma-MIR156y,gma-MIR156k,gma-MIR156n,mtr-MIR156i,mtr-MIR156c,mtr-MIR156d,mtr-MIR156b,mtr-MIR156j,vun-MIR156a,han-MIR156b,han-MIR156a,htu-MIR156a,cca-MIR156a,cca-MIR156b,har-MIR156a,hci-MIR156a,ath-MIR156a,ath-MIR156b,ath-MIR156c,ath…	mtr-MIR156c	ggtggTGACAGAAGAGAGTGAGCACacatggtgttttcttgcacgattatgtttcctgcttgaagctatatgTGCTTACTCTCTATCTGTCACCccac	mtr-miR156c-3p	TGCTTACTCTCTATCTGTCACC	3'	24740	5	5	0	3853	3853	0	3853	3853	0	0	y	..(((.((.((((((((((((((((((((.((((((...(((..((((......))))..))))))))).))))))))))))).))))))).)).)))	1	1	1	-51.5	38	20
pda-miR156a_L+1	ppt-miR156a_L+1	CUGACAGAAGAGAGUGAGCAC	+	7423	7520	0	0	PDK_30s987101	21	98	-51.5	12377.5	1982.5	568	9632.5	194.5	gp2a	23808	774	774	0	gp2a	aauggaggCuGACAGAAGAGAGuGAGCACacguggugcuuucuugcaugagucgaugcucgaaacuaugcguGCuCACuuuCuAuCuGuCACCcccca	165	ppt-MIR156b,ppt-MIR156c,ppt-MIR156a,smo-MIR156a,smo-MIR156d,gma-MIR156a,gma-MIR156u,gma-MIR156h,gma-MIR156v,gma-MIR156x,gma-MIR156o,gma-MIR156q,gma-MIR156s,gma-MIR156w,gma-MIR156y,gma-MIR156k,gma-MIR156n,mtr-MIR156i,mtr-MIR156c,mtr-MIR156d,mtr-MIR156b,mtr-MIR156j,vun-MIR156a,han-MIR156b,han-MIR156a,htu-MIR156a,cca-MIR156a,cca-MIR156b,har-MIR156a,hci-MIR156a,ath-MIR156a,ath-MIR156b,ath-MIR156c,ath…	ppt-MIR156a	ggcggtggaggatgtgggagTGACAGAAGAGAGTGAGCACagctgagcatgtacatgaggaagtacttgcccatgtgtgctcactctcttcctgtcgcacctctcctttgacgct	ppt-miR156a	TGACAGAAGAGAGTGAGCAC	5'	24740	12377.5	12287	90.5	9535353	9469486	65867	9533338	9469486	63852	0	y	..(((.((.((((((((((((((((((((.((((((...(((..((((......))))..))))))))).))))))))))))).))))))).)).)))	1	1	1	-51.5	38	20
pda-miR827-3p_R-1	bdi-miR827-3p_R-1	UUAGAUGACCAUCAGCAAAC	-	10134	10280	0	1	PDK_30s920241	20	147	-60.5	37	0.5	0.5	36	0	gp2a	57	745	705	1	gp2a	acagagagaugugcaugucuugugaaugcguuugcugauggucaucuaaccaugucuucacgcuucaaauuaaagaggggaagagaagauuugaagaugauuAGAuGACCAuCAGCAAAAcacauucaaagcugcauacuucuuagc	4	bdi-MIR827,ssp-MIR827,osa-MIR827,zma-MIR827,	bdi-MIR827	attgagccgattcatgcagctctgaacttgTTTTGTTGGTTGTCATCTAACCatcgatcggtccgtgcttcggtgcttgtgccatgattttgcatcatcacaccggcgatggTTAGATGACCATCAGCAAACAtgttcgtgagacatgccgtgcgtcctgagct	bdi-miR827-3p	TTAGATGACCATCAGCAAACA	3'	73	37	6	31	27018	4073	22945	25777	4073	21704	0	y	...((((..((((((.(.(((.((((((.((((((((((((((((((((.((..((((((..((((..................))))...)))))))).))))))))))))))))))).).))))))))))))))))..))))...	0	0	0	-60.5	52	19
pda-miR166a	pta-miR166a	UCGGACCAGGCUUCAUUCCCC	+	11105	11239	0	0	PDK_30s976901	21	135	-63.9	159896	31716.5	14448.5	108650	5081.5	gp2a	156871	779	779	0	gp2a	acccucccucaugauaguugagGGGAAuGuuGuCuGGuuCGAAaccguucgcacagagagcaccuucugauguugaucccucuuccaaaggaacgguuuCGGACCAGGCuuCAuuCCCCccaacucauggagucc	234	pta-MIR166b,pta-MIR166a,pde-MIR166b,pde-MIR166a,pab-MIR166a,pab-MIR166b,ppt-MIR166d,ppt-MIR166c,ppt-MIR166g,ppt-MIR166f,ppt-MIR166h,ppt-MIR166a,ppt-MIR166e,ppt-MIR166i,ppt-MIR166b,ppt-MIR166j,ppt-MIR166l,ppt-MIR166k,ppt-MIR166m,smo-MIR166b,smo-MIR166a,smo-MIR166c,gma-MIR166t,gma-MIR166b,gma-MIR166a,gma-MIR166d,gma-MIR166c,gma-MIR166g,gma-MIR166e,gma-MIR166i,gma-MIR166p,gma-MIR166u,gma-MIR166s,gma…	pta-MIR166a	ttgattgaggggaatgttgtctggctcgacttcatccggatttgggctccaatgttcggatgccgTCGGACCAGGCTTCATTCCCCccaatcgg	pta-miR166a	TCGGACCAGGCTTCATTCCCC	3'	162154	159896	158950	947	1.24465e+08	123748906	716208	1.24439e+08	123748906	690516	0	y	...((((...((((..((((.((((((((..(((((((((((((((((((.....(((((.....((.......))...)))))......)))))))))))))))))))..)))))))).))))))))))))...	4	0	0	-63.9	46	19
pda-miR166a-5p_L+1R-1_1ss16CT	gma-miR166a-5p_L+1R-1_1ss16CT	GGGAAUGUUGUCUGGUUCGAG	+	11105	11239	0	1	PDK_30s976901	21	135	-63.9	37	4.5	1	31	0.5	gp2a	8	792	753	1	gp2a	acccucccucaugauaguugagGGGAAuGuuGuCuGGuuCGAAaccguucgcacagagagcaccuucugauguugaucccucuuccaaaggaacgguuuCGGACCAGGCuuCAuuCCCCccaacucauggagucc	234	pta-MIR166b,pta-MIR166a,pde-MIR166b,pde-MIR166a,pab-MIR166a,pab-MIR166b,ppt-MIR166d,ppt-MIR166c,ppt-MIR166g,ppt-MIR166f,ppt-MIR166h,ppt-MIR166a,ppt-MIR166e,ppt-MIR166i,ppt-MIR166b,ppt-MIR166j,ppt-MIR166l,ppt-MIR166k,ppt-MIR166m,smo-MIR166b,smo-MIR166a,smo-MIR166c,gma-MIR166t,gma-MIR166b,gma-MIR166a,gma-MIR166d,gma-MIR166c,gma-MIR166g,gma-MIR166e,gma-MIR166i,gma-MIR166p,gma-MIR166u,gma-MIR166s,gma…	gma-MIR166l	tttccttgcaaaggtgaggttgagaGGAATGTTGTCTGGCTCGAGGtcatggaggaggagagtactcagatgagtgaaagtttccaatggaaatttaccctcttaacaccaaaaaaaaaaaaaaaattgattctgggaccaggcttcatttcccccatccaacttttgttttttattcc	gma-miR166a-5p	GGAATGTTGTCTGGCTCGAGG	5'	162154	37	27	10	27013.5	19409	7604.5	26647.5	19409	7238.5	0	y	...((((...((((..((((.((((((((..(((((((((((((((((((.....(((((.....((.......))...)))))......)))))))))))))))))))..)))))))).))))))))))))...	4	0	0	-63.9	46	19
pda-miR172h-5p_R-1_2ss2CT7GT	gma-miR172h-5p_R-1_2ss2CT7GT	GUAGCAUCAUCAAGAUUCAC	-	7175	7353	0	0	PDK_30s758731	20	179	-70.2	5	0	1.5	3.5	0	gp2a	3	657	657	0	gp2a	accgcugcugcaugggauaaaucggaacagucgguguuugcggguGuAGCAuCAuCAAGAuuCACauagcccugggcgauugcgaguuggcaacauggucccaaaugAGAAuCuuGAuGAuGCuGCAucagcaauaagcgacuauacucuggaauaugcuacugccuuugggcugccau	123	gma-MIR172h,gma-MIR172g,gma-MIR172j,gma-MIR172b,gma-MIR172l,gma-MIR172i,gma-MIR172f,gma-MIR172a,gma-MIR172c,gma-MIR172d,gma-MIR172e,aau-MIR172,lja-MIR172c,lja-MIR172b,lja-MIR172a,mtr-MIR172c,mtr-MIR172d,mtr-MIR172b,vun-MIR172,cca-MIR172,ath-MIR172a,ath-MIR172b,ath-MIR172e,ath-MIR172c,ath-MIR172d,bna-MIR172a,bna-MIR172c,bna-MIR172b,bna-MIR172d,bra-MIR172a,bra-MIR172b,aly-MIR172a,aly-MIR172b,aly-MI…	gma-MIR172i	gcaggtGCAGCAGCATCAAGATTCACAccgcctaatttgctaggacttcaggactgcacacgcttaattatacatacatatatacatatatgttagctctttgtggagtgcggaataaagttctattttagatgtgGGAATCTTGATGATGCTGCATcagc	gma-miR172h-5p	GCAGCAGCATCAAGATTCACA	5'	56	5	3.5	1.5	3530.5	2521.5	1009	3477	2521.5	955.5	0	y	...((.(((((((((.(((..(((((..(((((....((((.(((((((((((((((((((((.(((.....(((((.(((((......)))..)).).)))).))).))))))))))))))))))))).))))....)))))....)))))..))).))).))).....))).))...	2	0	0	-70.2	62	19
pda-miR167c_R+1	gma-miR167c_R+1	UGAAGCUGCCAGCAUGAUCUGA	-	148363	148465	0	0	PDK_30s943301	22	103	-44	8943	1784	124	6989	46	gp2a	17340	821	821	0	gp2a	acgagcagcuGAAGCuGCCAGCAuGAuCuGAucucuucuuuccuuucuuccaaaucuuggaugaauaugcacaucAGAuCAuGuuGCAGuuuCAuCugcugau	146	ppt-MIR167,gma-MIR167g,gma-MIR167b,gma-MIR167c,gma-MIR167e,gma-MIR167f,gma-MIR167a,gma-MIR167d,gso-MIR167a,ahy-MIR167,lja-MIR167,lja-MIR167c,lja-MIR167a,lja-MIR167b,mtr-MIR167b,mtr-MIR167a,cca-MIR167,ath-MIR167b,ath-MIR167d,ath-MIR167a,ath-MIR167c,bna-MIR167a,bna-MIR167c,bna-MIR167d,bna-MIR167b,aly-MIR167b,aly-MIR167d,aly-MIR167a,aly-MIR167c,cpa-MIR167d,cpa-MIR167c,cpa-MIR167a,cme-MIR167f,cme-MIR…	gma-MIR167c	tttgagaggtTGAAGCTGCCAGCATGATCTGgtaaatcacatacttttttttttctcacctctcatgcctaatttttaagcaccagtcattagagaaaataatggtgaaaaatccatctattcaattttttttttcaaattcaaggtttccagtatgtatcactaatggtgaaaaaagtgatggaattttgtagaacatgggttaaatttactttttttttttttgagttttcattttcttcaagtttctgagccaagaaataaaagagacttataaattggaattaatacttaaaggaaacccaccagaagggcaatttggttatcataagatgtggtttccatcaggtcatcttgcagcttcaatcactcaat	gma-miR167c	TGAAGCTGCCAGCATGATCTG	5'	18615	8943	8685.5	257.5	7.32997e+06	7.13106e+06	198906	7321698	7.13106e+06	190636	0	y	...(((((.((((((((.((((((((((((((............(((.(((((...))))).))).......)))))))))))))))))))))).)))))...	1	1	1	-44	27	21
pda-miR169a_R-1_1ss20TA	cca-miR169a_R-1_1ss20TA	UAGCCAAGGAUGACUUGCCA	-	20774	20935	0	0	PDK_30s729731	20	162	-74.4	1.5	0	0	1	0.5	gp2a	2	769	769	0	gp2a	agagaggucuuacauggagauuagagucugucuuugguAGCCAAGGAuGACuuGCCAguguccucuuacugagguuuucuauguuugaaagcucuucuuggcuucacgggcaaucaccuuggcuacucugaguggcucuuaucuaccaugcuaggccuccau	119	cca-MIR169a,cca-MIR169b,ath-MIR169j,ath-MIR169h,ath-MIR169m,ath-MIR169i,ath-MIR169k,ath-MIR169l,ath-MIR169n,bna-MIR169i,bna-MIR169k,bna-MIR169f,bna-MIR169d,bna-MIR169l,bna-MIR169j,bna-MIR169g,bna-MIR169h,bna-MIR169e,bna-MIR169c,aly-MIR169l,aly-MIR169i,aly-MIR169j,aly-MIR169h,aly-MIR169k,aly-MIR169m,cme-MIR169n,cme-MIR169e,mes-MIR169p,mes-MIR169v,mes-MIR169s,mes-MIR169u,mes-MIR169x,mes-MIR169aa,me…	cca-MIR169a	gtttagTAGCCAAGGATGACTTGCCTTgtttgaacacatcaagttgctggaaagtagcaccttgtttggttcgttaggcagtcactcctaggctaacttgac	cca-miR169a	TAGCCAAGGATGACTTGCCTT	5'	3	1.5	1	0.5	1188.5	769	419.5	1168.5	769	399.5	0	y	...(((((((..(((((((((.((((((..((...(((((((((((.(((.(((((.(((.((((.....))))..............(((((......)))))))).)))))))))))))))))))..))..)))))).)))).)))))..)))))))...	1	1	2	-74.4	46	17
pda-miR166b-p3	pab-MIR166b-p3	UCUCGGACCAGGCUUCAUUC	+	211	359	0	0	PDK_30s974621	20	149	-65	2015	267	157.5	1523.5	67	gp2a	612	737	737	0	gp2a	agaggaagcuuuuucuuugaggGGAAuGuuGuCuGGCuCGAGGccuccaauucuugggcuuuuuuuuuucuuuagaucuggugguaaagagagaaaaaaaaaaagggauCuCGGACCAGGCuuCAuuCcccccaaucacagcuuccauc	242	pta-MIR166b,pta-MIR166a,pde-MIR166b,pde-MIR166a,pab-MIR166a,pab-MIR166b,ppt-MIR166d,ppt-MIR166c,ppt-MIR166g,ppt-MIR166f,ppt-MIR166h,ppt-MIR166a,ppt-MIR166e,ppt-MIR166i,ppt-MIR166b,ppt-MIR166m,ppt-MIR166j,ppt-MIR166l,ppt-MIR166k,smo-MIR166b,smo-MIR166a,smo-MIR166c,gma-MIR166l,gma-MIR166m,gma-MIR166t,gma-MIR166b,gma-MIR166a,gma-MIR166d,gma-MIR166c,gma-MIR166r,gma-MIR166g,gma-MIR166e,gma-MIR166i,gma…	pab-MIR166b	tttcagagttgggatatcgggaatgaaacctgggtcaagatgatttgaaggcaggctgttgaagattatcTCGGACCAGGCTTCATTCCTTgcatccaaactctttaagtactgctgctcaattgaaaa	pab-MIR166b-p3	tcTCGGACCAGGCTTCATTC	3'	4704	2015	774	1241	1458309	552748	905561	1.42359e+06	552748	870838	0	y	...(((((((......(((.((((((((..((((((..((((((((((((...))))..((((((((((((((..(((....)))..))))))))))))))...))).)))))..))))))..)))))))).)))....)))))))...	4	0	0	-65	32	17
pda-miR166a-5p	gma-miR166a-5p	GGAAUGUUGUCUGGCUCGAGG	+	211	359	0	0	PDK_30s974621	21	149	-65	565.5	48.5	62.5	423.5	31	gp2a	442	779	779	0	gp2a	agaggaagcuuuuucuuugaggGGAAuGuuGuCuGGCuCGAGGccuccaauucuugggcuuuuuuuuuucuuuagaucuggugguaaagagagaaaaaaaaaaagggauCuCGGACCAGGCuuCAuuCcccccaaucacagcuuccauc	242	pta-MIR166b,pta-MIR166a,pde-MIR166b,pde-MIR166a,pab-MIR166a,pab-MIR166b,ppt-MIR166d,ppt-MIR166c,ppt-MIR166g,ppt-MIR166f,ppt-MIR166h,ppt-MIR166a,ppt-MIR166e,ppt-MIR166i,ppt-MIR166b,ppt-MIR166m,ppt-MIR166j,ppt-MIR166l,ppt-MIR166k,smo-MIR166b,smo-MIR166a,smo-MIR166c,gma-MIR166l,gma-MIR166m,gma-MIR166t,gma-MIR166b,gma-MIR166a,gma-MIR166d,gma-MIR166c,gma-MIR166r,gma-MIR166g,gma-MIR166e,gma-MIR166i,gma…	gma-MIR166q	tgttaggttgagaGGAATGTTGTCTGGCTCGAGGtcatgaagatatacatatgaaagtgttaacttttcagttaatttctaggataaattaatggaaattaatttataccctaaatgattcTCGGACCAGGCTTCATTCCCCccagccaaca	gma-miR166a-5p	GGAATGTTGTCTGGCTCGAGG	5'	4704	565.5	309	256.5	435502	235483	200019	426062	235483	190580	0	y	...(((((((......(((.((((((((..((((((..((((((((((((...))))..((((((((((((((..(((....)))..))))))))))))))...))).)))))..))))))..)))))))).)))....)))))))...	4	0	0	-65	32	17
pda-miR169j-3p_R+1_2ss18TG19CT	aly-miR169j-3p_R+1_2ss18TG19CT	GGCAGUCUCCUUGGCUAGUC	+	11630	11801	0	0	PDK_30s1138451	20	172	-73.7	55	2	4.5	41.5	7	gp2a	66	738	738	0	gp2a	agaggucuuacaugaggcuaagagcucaucuuugguAGCCAAGGAuGACuuGCCuuaaaucucuucaagaucuuaaugaugguucaaggcaucauauucgagagcuuugugugguucaugGGCAGuCuCCuuGGCuAGuCugaguggcucuuauccuucaugcuagaccuuc	247	pde-MIR169,gma-MIR169b,gma-MIR169g,gma-MIR169p,gma-MIR169v,gma-MIR169d,gma-MIR169s,gma-MIR169c,gma-MIR169h,gma-MIR169f,gma-MIR169u,gma-MIR169a,gma-MIR169m,gma-MIR169e,mtr-MIR169a,mtr-MIR169f,mtr-MIR169d,mtr-MIR169g,mtr-MIR169e,mtr-MIR169b,mtr-MIR169l,vun-MIR169,cca-MIR169a,cca-MIR169b,ath-MIR169j,ath-MIR169h,ath-MIR169m,ath-MIR169i,ath-MIR169k,ath-MIR169l,ath-MIR169n,ath-MIR169f,ath-MIR169d,ath-M…	aly-MIR169k	gaaggagatgtcaaagatgaataagagaaccacatttggTAGCCAAGGATGACTTGCCTGtttctttgaacaaaatggttggtgtcatgtttgatgtgactacaagttatatcaagaatgacattttgcttataaaaagacatcaGGCAGTCTCCTTGGCTATCcttatatgttcttctttctcatctcagacatttaccttc	aly-miR169j-3p	GGCAGTCTCCTTGGCTATC	3'	370	55	39.5	15.5	37635	28704.5	8930.5	37086	28704.5	8381.5	0	y	.(((((((..(((((((.(((((((.((.((..((((((((((((.((((.((((..((((....((((.((((.((((((........))))))....))))..))))...))))...)))))))))))))))))).))..))))))))))).))).))))..))))))).	1	1	2	-73.7	63	18
pda-miR169_R-1_1ss1CT	pde-miR169_R-1_1ss1CT	UAGCCAAGGAUGACUUGCCU	+	11630	11801	0	0	PDK_30s1138451	20	172	-73.7	146	2	1	143	0	gp2a	172	733	733	0	gp2a	agaggucuuacaugaggcuaagagcucaucuuugguAGCCAAGGAuGACuuGCCuuaaaucucuucaagaucuuaaugaugguucaaggcaucauauucgagagcuuugugugguucaugGGCAGuCuCCuuGGCuAGuCugaguggcucuuauccuucaugcuagaccuuc	247	pde-MIR169,gma-MIR169b,gma-MIR169g,gma-MIR169p,gma-MIR169v,gma-MIR169d,gma-MIR169s,gma-MIR169c,gma-MIR169h,gma-MIR169f,gma-MIR169u,gma-MIR169a,gma-MIR169m,gma-MIR169e,mtr-MIR169a,mtr-MIR169f,mtr-MIR169d,mtr-MIR169g,mtr-MIR169e,mtr-MIR169b,mtr-MIR169l,vun-MIR169,cca-MIR169a,cca-MIR169b,ath-MIR169j,ath-MIR169h,ath-MIR169m,ath-MIR169i,ath-MIR169k,ath-MIR169l,ath-MIR169n,ath-MIR169f,ath-MIR169d,ath-M…	pde-MIR169	actatttattCAGCCAAGGATGACTTGCCTAgatcttgttaccagtatcggctagttatgctgatatcgatttcagtcactaggtgagtcgtccttggctaaa	pde-miR169	CAGCCAAGGATGACTTGCCTA	5'	370	146	143	3	104950	102704	2246	104896	102704	2192	0	y	.(((((((..(((((((.(((((((.((.((..((((((((((((.((((.((((..((((....((((.((((.((((((........))))))....))))..))))...))))...)))))))))))))))))).))..))))))))))).))).))))..))))))).	1	1	2	-73.7	63	18
pda-miR169a_R-2_1ss19CT	cca-miR169a_R-2_1ss19CT	UAGCCAAGGAUGACUUGCU	-	7994	8149	0	1	PDK_30s1124371	19	156	-66.4	6	0	0	5.5	0.5	gp2a	6	712	672	1	gp2a	agaggucuuacauggagauuagagucugucugguAGCCAAGGAuGACuuGCCagcgucuucuuacugagguuuucuauguuugaaagcucuucuuggcuucacgggcagucaccuugacuacucugaguggcucuuaucuaccaugcuagaccucc	121	cca-MIR169a,cca-MIR169b,ath-MIR169j,ath-MIR169i,ath-MIR169h,ath-MIR169k,ath-MIR169l,ath-MIR169m,ath-MIR169n,bna-MIR169i,bna-MIR169e,bna-MIR169k,bna-MIR169f,bna-MIR169c,bna-MIR169d,bna-MIR169l,bna-MIR169j,bna-MIR169g,bna-MIR169h,aly-MIR169l,aly-MIR169h,aly-MIR169i,aly-MIR169k,aly-MIR169m,aly-MIR169j,cme-MIR169e,cme-MIR169n,mes-MIR169ab,mes-MIR169q,mes-MIR169p,mes-MIR169o,mes-MIR169t,mes-MIR169v,me…	cca-MIR169a	gtttagTAGCCAAGGATGACTTGCCTTgtttgaacacatcaagttgctggaaagtagcaccttgtttggttcgttaggcagtcactcctaggctaacttgac	cca-miR169a	TAGCCAAGGATGACTTGCCTT	5'	11	6	1.5	4.5	4254.5	1188.5	3066	4073.5	1188.5	2885	0	y	.(((((((..(((((((((.((((((..((.(((((.(((((.(((((.(((..(((.........(((((((((.......)))))).))).........)))))))))))))))).)))))..))..)))))).)))).)))))..))))))).	2	1	2	-66.4	45	16
pda-miR529-3p	bdi-miR529-3p	GCUGUACCCUCUCUCUUCUUC	-	1738	1849	0	0	PDK_30s912631	21	112	-58.2	12.5	0	0	12.5	0	gp2a	22	774	774	0	gp2a	agaucaucaaggccaaugggAGAAGAGAGAGAGuACAGCuAgcucauucucaugguagagggaugauaagaGCuGuACCCuCuCuCuuCuuCucuugggcuauugaugaagg	8	ppt-MIR529f,ppt-MIR529e,ath-MIR156j,bdi-MIR529,osa-MIR529b,osa-MIR529a,sbi-MIR529,zma-MIR529,	bdi-MIR529	cgtcaaggttaaagggAGAAGAGAGAGAGTACAGCCTtaattaagctcgatcgatctgtcttgtatcaagGCTGTACCCTCTCTCTTCTTCtcttagcttcttgatg	bdi-miR529-3p	GCTGTACCCTCTCTCTTCTTC	3'	81	12.5	12	0.5	9653.5	9275	378.5	9633	9275	358	0	y	...((((((((.((((..(((((((((((((.((((((((...((((((((......)).))))))....)))))))).)))))))))))))..)))).))..))))))...	2	0	0	-58.2	41	19
pda-miR169a_R-1	cca-miR169a_R-1	UAGCCAAGGAUGACUUGCCU	-	50749	50921	0	0	PDK_30s1096841	20	173	-70.3	93.5	1.5	1	91	0	gp2a	172	733	733	0	gp2a	aggggucuuacaugaggcuaagaguuuuaucuuugguAGCCAAGGAuGACuuGCCuauaauuucuucaagaucucagugaugcuucaagccaucaugauugaaaucuuugugugauucauaGGCAGuCuCCuuGGCuAGuCuauguggcucuuaucucucaugcuagaccugc	105	cca-MIR169a,ath-MIR169j,ath-MIR169h,ath-MIR169m,ath-MIR169i,ath-MIR169k,ath-MIR169l,ath-MIR169n,bna-MIR169i,bna-MIR169k,bna-MIR169f,bna-MIR169d,bna-MIR169l,bna-MIR169j,bna-MIR169g,bna-MIR169h,bna-MIR169e,bna-MIR169c,aly-MIR169l,aly-MIR169i,aly-MIR169j,aly-MIR169h,aly-MIR169k,aly-MIR169m,cme-MIR169n,cme-MIR169e,cme-MIR169k,mes-MIR169p,mes-MIR169s,mes-MIR169u,mes-MIR169aa,mes-MIR169ab,mes-MIR169q,m…	cca-MIR169a	gtttagTAGCCAAGGATGACTTGCCTTgtttgaacacatcaagttgctggaaagtagcaccttgtttggttcgttaggcagtcactcctaggctaacttgac	cca-miR169a	TAGCCAAGGATGACTTGCCTT	5'	257	93.5	92	1.5	68677	67658	1019	68649	67658	991	0	y	..((((((..(((((((.(((((((..(((....((((((((((((.((((.((((((((((.....(((((.((((((((((.....).))))))...))).))))).....)))).)))))))))))))))))))).)).)))..))))))).).))))))..))))))..	1	1	2	-70.3	64	18
pda-miR169j-3p_R+1_2ss18TG19CT	aly-miR169j-3p_R+1_2ss18TG19CT	GGCAGUCUCCUUGGCUAGUC	-	50749	50921	0	0	PDK_30s1096841	20	173	-70.3	35	1.5	0.5	33	0	gp2a	66	738	738	0	gp2a	aggggucuuacaugaggcuaagaguuuuaucuuugguAGCCAAGGAuGACuuGCCuauaauuucuucaagaucucagugaugcuucaagccaucaugauugaaaucuuugugugauucauaGGCAGuCuCCuuGGCuAGuCuauguggcucuuaucucucaugcuagaccugc	105	cca-MIR169a,ath-MIR169j,ath-MIR169h,ath-MIR169m,ath-MIR169i,ath-MIR169k,ath-MIR169l,ath-MIR169n,bna-MIR169i,bna-MIR169k,bna-MIR169f,bna-MIR169d,bna-MIR169l,bna-MIR169j,bna-MIR169g,bna-MIR169h,bna-MIR169e,bna-MIR169c,aly-MIR169l,aly-MIR169i,aly-MIR169j,aly-MIR169h,aly-MIR169k,aly-MIR169m,cme-MIR169n,cme-MIR169e,cme-MIR169k,mes-MIR169p,mes-MIR169s,mes-MIR169u,mes-MIR169aa,mes-MIR169ab,mes-MIR169q,m…	aly-MIR169k	gaaggagatgtcaaagatgaataagagaaccacatttggTAGCCAAGGATGACTTGCCTGtttctttgaacaaaatggttggtgtcatgtttgatgtgactacaagttatatcaagaatgacattttgcttataaaaagacatcaGGCAGTCTCCTTGGCTATCcttatatgttcttctttctcatctcagacatttaccttc	aly-miR169j-3p	GGCAGTCTCCTTGGCTATC	3'	257	35	33.5	1.5	25771.5	24639.5	1132	25731	24639.5	1091.5	0	y	..((((((..(((((((.(((((((..(((....((((((((((((.((((.((((((((((.....(((((.((((((((((.....).))))))...))).))))).....)))).)))))))))))))))))))).)).)))..))))))).).))))))..))))))..	1	1	2	-70.3	64	18
pda-miR169b_R-2	cca-miR169b_R-2	UAGCCAAGGAUGACUUGCU	-	28015	28197	0	1	PDK_30s729731	19	183	-73.6	5	0	0	4.5	0.5	gp2a	6	712	672	1	gp2a	aguggaagaaaggucuuacauggagauaagaagagucugccuuugguAGCCAAGGAuGACuuGCCuguguccuccuuguggagguuacaugucuuugaaagcucuuuguggcuuuacgggcagucuccugggcuauucugagaggcucuuauccaccaugcuaggccuacaccuccuucccau	74	cca-MIR169b,ath-MIR169j,ath-MIR169h,ath-MIR169m,ath-MIR169i,ath-MIR169k,ath-MIR169l,ath-MIR169n,bna-MIR169i,bna-MIR169k,bna-MIR169l,bna-MIR169j,bna-MIR169g,bna-MIR169h,aly-MIR169l,aly-MIR169i,aly-MIR169j,aly-MIR169h,aly-MIR169k,aly-MIR169m,cme-MIR169n,cme-MIR169e,cme-MIR169k,mes-MIR169p,mes-MIR169s,mes-MIR169u,mes-MIR169aa,mes-MIR169q,mes-MIR169o,mes-MIR169w,mes-MIR169y,lus-MIR169c,lus-MIR169k,lu…	cca-MIR169b	ttctggTAGCCAAGGATGACTTGCTACatcccaattcaaggtggtagcaaacaacgccttgtttggtttttcaggcagtcactccttggctaacttgaa	cca-miR169b	TAGCCAAGGATGACTTGCTAC	5'	10	5	1	4	3649	830	2819	3507	830	2677	0	y	...(((((..((((((..(((((.(((((((.......((((((.((((((.((((.(((.(((((((..(((((....))))).............((((((......)))))))))))))))))))).))))))....)))))))))))))..)))))..)))))).......)))))...	2	1	2	-73.6	49	16
pda-miR169c_R-1_2ss14CT15TC	bna-miR169c_R-1_2ss14CT15TC	UAGCCAAGGAUGAUCUGCCU	-	156	333	0	0	PDK_30s1187501	20	178	-78.4	85	8	14.5	60.5	2	gp2a	58	735	735	0	gp2a	aguggaagagaggucuuacauggagauaggagucugacuuugauAGCCAAGGAuGAuCuGCCuauguccucuucgaguguuuucaguguuucaaaagcuuuggguggucucguaGGCAGuCuCCuuGGCuAGuuugagcgacuuuuauccgccaugccagaccuacaucucuucccca	49	bna-MIR169f,bna-MIR169d,bna-MIR169e,bna-MIR169c,cme-MIR169e,mes-MIR169ab,mes-MIR169ac,ssl-MIR169,ghr-MIR169b,tcc-MIR169d,aqc-MIR169a,mdm-MIR169b,ptc-MIR169j,ptc-MIR169r,sly-MIR169d,stu-MIR169e,stu-MIR169g,stu-MIR169h,vvi-MIR169x,bdi-MIR169g,bdi-MIR169e,bdi-MIR169k,bdi-MIR169h,osa-MIR169i,osa-MIR169k,osa-MIR169r,osa-MIR169l,osa-MIR169j,osa-MIR169m,osa-MIR169h,osa-MIR169g,osa-MIR169f,sbi-MIR169g,sb…	bna-MIR169c	agatgaatagaagaatcatatttggTAGCCAAGGATGACTTGCCTAtttcttgagagtaaaatgggcatggtgtcatgttaaaagttactgtaggtagtttcaatttgaccattttccttacaaatgatattaggcagtctccttggctatccttatatgttcttctctctcatct	bna-miR169c	TAGCCAAGGATGACTTGCCTA	5'	91	85	84	1	60101	59370	731	60078.5	59370	708.5	0	y	...(((((((((((((..(((((.((((..((((.(.(((...((((((((((.((.(((((((((.((.((..((((..................))))..)).))...)))))))))))))))))))))....))))))))..))))..)))))..)))))....))))))))...	1	1	2	-78.4	59	18
pda-miR169e-3p_R+1_1ss19CT	bdi-miR169e-3p_R+1_1ss19CT	GGCAGUCUCCUUGGCUAGUA	-	156	333	0	1	PDK_30s1187501	20	178	-78.4	2.5	0	0	2.5	0	gp2a	4	718	681	1	gp2a	aguggaagagaggucuuacauggagauaggagucugacuuugauAGCCAAGGAuGAuCuGCCuauguccucuucgaguguuuucaguguuucaaaagcuuuggguggucucguaGGCAGuCuCCuuGGCuAGuuugagcgacuuuuauccgccaugccagaccuacaucucuucccca	49	bna-MIR169f,bna-MIR169d,bna-MIR169e,bna-MIR169c,cme-MIR169e,mes-MIR169ab,mes-MIR169ac,ssl-MIR169,ghr-MIR169b,tcc-MIR169d,aqc-MIR169a,mdm-MIR169b,ptc-MIR169j,ptc-MIR169r,sly-MIR169d,stu-MIR169e,stu-MIR169g,stu-MIR169h,vvi-MIR169x,bdi-MIR169g,bdi-MIR169e,bdi-MIR169k,bdi-MIR169h,osa-MIR169i,osa-MIR169k,osa-MIR169r,osa-MIR169l,osa-MIR169j,osa-MIR169m,osa-MIR169h,osa-MIR169g,osa-MIR169f,sbi-MIR169g,sb…	bdi-MIR169e	ccttacatggtgataaggggtttggccctgaTAGCCAAGGATGACTTGCCTGtgcatgtcctcccttgatcgcttgcataatttcatatatgcatgtgatctcgatttatcacaGGCAGTCTCCTTGGCTAGCctgggtgcctcttatcctccatgctaggcct	bdi-miR169e-3p	GGCAGTCTCCTTGGCTAGC	3'	91	2.5	0	2.5	1780	0	1780	1691.5	0	1691.5	0	y	...(((((((((((((..(((((.((((..((((.(.(((...((((((((((.((.(((((((((.((.((..((((..................))))..)).))...)))))))))))))))))))))....))))))))..))))..)))))..)))))....))))))))...	1	1	2	-78.4	59	18
pda-miR169b_R-2_1ss1TC	cca-miR169b_R-2_1ss1TC	CAGCCAAGGAUGACUUGCU	-	7484	7639	0	1	PDK_30s891391	19	156	-78.2	316.5	9	0	307.5	0	gp2a	185	701	662	1	gp2a	auagccagggccuuacuugaagaggcagagaguggaaugCAGCCAAGGAuGACuuGCCgacaagggccagagagaagcauaucucaacuguaagcugucggcagguuguccgaagcuacauuuggcucuuuucuucucauguaaggcucuugcaug	122	pde-MIR169,gma-MIR169p,gma-MIR169c,gma-MIR169b,gma-MIR169g,gma-MIR169v,gma-MIR169f,gma-MIR169u,gma-MIR169a,gma-MIR169m,mtr-MIR169a,mtr-MIR169g,mtr-MIR169b,mtr-MIR169l,vun-MIR169,cca-MIR169b,ath-MIR169d,ath-MIR169e,ath-MIR169b,ath-MIR169c,ath-MIR169a,bna-MIR169b,bna-MIR169n,bna-MIR169a,aly-MIR169e,aly-MIR169d,aly-MIR169c,aly-MIR169b,aly-MIR169a,cme-MIR169h,cme-MIR169f,mes-MIR169c,mes-MIR169e,mes-M…	cca-MIR169b	ttctggTAGCCAAGGATGACTTGCTACatcccaattcaaggtggtagcaaacaacgccttgtttggtttttcaggcagtcactccttggctaacttgaa	cca-miR169b	TAGCCAAGGATGACTTGCTAC	5'	353	316.5	1	315.5	226688	809	225879	215173	809	214364	0	y	...((.((((((((((.((.(((((.(((((((..((((.(((...(((..(((((((((((.....(((.((((......))))..))).....)))))))))))..)))...))).))))..))))))).))))))).)))))))))).))...	6	0	0	-78.2	54	13
pda-miR172i-3p	gma-miR172i-3p	GGAAUCUUGAUGAUGCUGCAU	+	24278	24380	0	0	PDK_30s661361	21	103	-57	42.5	2.5	0.5	38	1.5	gp2a	24	786	786	0	gp2a	aucagucgcuguuuGCuGGuGuGGCAuCAuCaagauucacaagcucuuguuugugagagaggugGGAAuCuuGAuGAuGCuGCAucggcaauaaacgacuauu	131	gma-MIR172i,gma-MIR172l,gma-MIR172b,gma-MIR172f,gma-MIR172k,gma-MIR172a,gma-MIR172h,gma-MIR172g,gma-MIR172j,gma-MIR172d,gma-MIR172c,gma-MIR172e,aau-MIR172,lja-MIR172b,lja-MIR172a,lja-MIR172c,mtr-MIR172c,mtr-MIR172b,mtr-MIR172d,vun-MIR172,cca-MIR172,ath-MIR172a,ath-MIR172e,ath-MIR172c,ath-MIR172b,ath-MIR172d,bna-MIR172b,bna-MIR172c,bna-MIR172d,bna-MIR172a,bra-MIR172b,bra-MIR172a,aly-MIR172e,aly-MI…	gma-MIR172l	cagtctgcaggtgcagcggcatcaagattcacactgcctaatcagctaggacttcatgactgtacacgcttatacatacatatatatacatgtacgttggctctttgtggacgagtgtggaatgaataaagttctattttagatgtgGGAATCTTGATGATGCTGCATcagcaaatac	gma-miR172i-3p	GGAATCTTGATGATGCTGCAT	3'	82	42.5	42.5	0	30741.5	30741.5	0	30741.5	30741.5	0	0	y	...(((((....(((((((((..(((((((((((((((.((..(((((......)))))...)).)))))))))))))))..)))))))))....)))))...	4	0	0	-57	36	17
pda-miR160a-3p_R-1	osa-miR160a-3p_R-1	GCGUGCAAGGAGCCAAGCAU	+	8459	8544	0	0	PDK_30s65509285	20	86	-48.7	2	0	0	2	0	gp1b	1	673	673	0	gp1b	auGCCuGGCuCCCuGuAuGCCAcacguauagaccaaucuauugugagauuggcuacuuugggugGCGuGCAAGGAGCCAAGCAugc	2	osa-MIR160a,zma-MIR160g,	osa-MIR160a	gtgTGCCTGGCTCCCTGTATGCCAcacatgtagaccaacccatggtgtctggttgcctactgggtgGCGTGCAAGGAGCCAAGCATGc	osa-miR160a-3p	GCGTGCAAGGAGCCAAGCATG	3'	913	2	2	0	1237	1237	0	1237	1237	0	0	y	((((.(((((((.((((((((((.((..(((.(((((((......))))))))))...)).)))))))))).))))))).))))..	2	0	0	-48.7	33	19
pda-miR160a-5p	osa-miR160a-5p	UGCCUGGCUCCCUGUAUGCCA	+	8459	8544	0	0	PDK_30s65509285	21	86	-48.7	911	33	86	740	52	gp1b	675	782	782	0	gp1b	auGCCuGGCuCCCuGuAuGCCAcacguauagaccaaucuauugugagauuggcuacuuugggugGCGuGCAAGGAGCCAAGCAugc	2	osa-MIR160a,zma-MIR160g,	osa-MIR160a	gtgTGCCTGGCTCCCTGTATGCCAcacatgtagaccaacccatggtgtctggttgcctactgggtgGCGTGCAAGGAGCCAAGCATGc	osa-miR160a-5p	TGCCTGGCTCCCTGTATGCCA	5'	913	911	862	49	696984	660971	36013	695295	660971	34324	0	y	((((.(((((((.((((((((((.((..(((.(((((((......))))))))))...)).)))))))))).))))))).))))..	2	0	0	-48.7	33	19
pda-miR168c-3p_R-1	mtr-miR168c-3p_R-1	CCCGCCUUGCAUCAACUGAA	+	3972	4087	0	0	PDK_30s779511	20	116	-59.7	374.5	12	25.5	305	32	gp2a	395	736	736	0	gp2a	auggucgcugccgccucugauuCGCuuGGuGCAGGuCGGGAacgggcucgauuuuugcccgacggugagcuggauCCCGCCuuGCAuCAACuGAAuccgagccggaaugcgacgcu	34	gma-MIR168a,gma-MIR168b,mtr-MIR168b,mtr-MIR168c,vun-MIR168,cca-MIR168a,ath-MIR168a,ath-MIR168b,bna-MIR168a,bna-MIR168b,aly-MIR168b,aly-MIR168a,cme-MIR168,mes-MIR168a,rco-MIR168,lus-MIR168b,lus-MIR168a,tcc-MIR168,mdm-MIR168b,mdm-MIR168a,ppe-MIR168,crt-MIR168,ccl-MIR168,ptc-MIR168a,ptc-MIR168b,sly-MIR168b,sly-MIR168a,nta-MIR168d,nta-MIR168a,nta-MIR168e,nta-MIR168c,nta-MIR168b,vvi-MIR168,zma-MIR168b,	mtr-MIR168c	ctcacttcgcggtctctaatTCGCTTGGTGCAGGTCGGGAAccactacatccgctgttttcgtagaaaccggcggtgaattggatCCCGCCTTGCATCAACTGAATcggaggccgcggtgaatcta	mtr-miR168c-3p	CCCGCCTTGCATCAACTGAAT	3'	2053	374.5	374.5	0	279996	279996	0	279996	279996	0	0	y	...(((((..(((.(((.(((((..((((((((((.(((((.(((((.........))))).(((....)))..))))).))))))))))..))))).))).)))...)))))...	4	0	0	-59.7	31	17
pda-miR168a_R-1	gma-miR168a_R-1	UCGCUUGGUGCAGGUCGGGA	+	3972	4087	0	0	PDK_30s779511	20	116	-59.7	654	40.5	102.5	448	63	gp2a	733	733	733	0	gp2a	auggucgcugccgccucugauuCGCuuGGuGCAGGuCGGGAacgggcucgauuuuugcccgacggugagcuggauCCCGCCuuGCAuCAACuGAAuccgagccggaaugcgacgcu	34	gma-MIR168a,gma-MIR168b,mtr-MIR168b,mtr-MIR168c,vun-MIR168,cca-MIR168a,ath-MIR168a,ath-MIR168b,bna-MIR168a,bna-MIR168b,aly-MIR168b,aly-MIR168a,cme-MIR168,mes-MIR168a,rco-MIR168,lus-MIR168b,lus-MIR168a,tcc-MIR168,mdm-MIR168b,mdm-MIR168a,ppe-MIR168,crt-MIR168,ccl-MIR168,ptc-MIR168a,ptc-MIR168b,sly-MIR168b,sly-MIR168a,nta-MIR168d,nta-MIR168a,nta-MIR168e,nta-MIR168c,nta-MIR168b,vvi-MIR168,zma-MIR168b,	gma-MIR168b	cggtctctaatTCGCTTGGTGCAGGTCGGGAAccggttttcgcgcggaatggaggaacggtcgccggcggcgaattggatcccgccttgcatcaactgaatcggaggccg	gma-miR168a	TCGCTTGGTGCAGGTCGGGAA	5'	2053	654	653.5	0.5	485663	485278	385	485658	485278	380	0	y	...(((((..(((.(((.(((((..((((((((((.(((((.(((((.........))))).(((....)))..))))).))))))))))..))))).))).)))...)))))...	4	0	0	-59.7	31	17
pda-miR1310-p5	pde-MIR1310-p5	CGCCCUCGACCUAUUCUCAAACUUUAAAUAG	-	772	856	0	0	M01000038355	31	85	-34.8	36527	4025	19268	2544	10690	gp1b	2947	1174	1174	0	gp1b	auuaggaggcagucgggggcgcaaCGCCCuCGACCuAuuCuCAAACuuuAAAuAGGuAGGACGGCGCGGCuGCuccguugagccg	4	pta-MIR1310,pde-MIR1310,cln-MIR1310,han-MIR1310,	pde-MIR1310	attagaGGCATCGGGGGCGTAACGCCCTcgacctattctcaaactttaaataggtaagagggtgcggctgctccattgagccg	pde-MIR1310-p5	CGCCCTcgacctattctcaaactttaaatag	5'	109728	36527	33806	2721	40053889	37125621	2928268	39963939	37125621	2838318	0	n	.....((((..((((((((((...))))))))))....))))............(((..(((((.((....)).)))))..))).	6	2	1	-34.8	14	26
pda-miR528-5p	bdi-miR528-5p	UGGAAGGGGCAUGCAGAGGAG	-	15898	16051	0	0	PDK_30s1156261	21	154	-79.3	399	1	38	347.5	12.5	gp2a	337	780	780	0	gp2a	auugggagguagcaguagcaguGGAAGGGGCAuGCAGAGGAGaggccaagaaggagagaaggagagaaggaaagaaagauucucaucucagugcuucuucuggaggcaaauuCCuGuGCuuGCCuCCuCCAcuccugcugcuuccacuccccca	6	bdi-MIR528,ssp-MIR528,osa-MIR528,sbi-MIR528,zma-MIR528b,zma-MIR528a,	bdi-MIR528	tttggggttgggattgggggctggagcagcagcggTGGAAGGGGCATGCAGAGGAGcagggatgatggggggttgtactctgcttcttcccctctcgttctCCTGTGCCTGCCTCTTCCATTcctgctgctaccgccgtgctcggtgggcagggctgggc	bdi-miR528-5p	TGGAAGGGGCATGCAGAGGAG	5'	459	399	365.5	33.5	307108	282479	24629.5	305891	282479	23412	0	y	...(((((..((((((((.((((((.((((((.(((.(((((..(((.((((((((.....((((..((((........))))..))))....))))))))...)))...))))).))).)))))).)))))).))))))))....)))))...	2	0	0	-79.3	52	18
pda-miR396a-5p_L-4_1ss20TC	gma-miR396a-5p_L-4_1ss20TC	ACAGCUUUCUUGAACCG	-	326	438	0	1	PDK_30s999911	17	113	-57.3	2	0	0	2	0	gp2a	2	611	573	1	gp2a	auuuggucacucucuguaauuucccACAGCuuuAuuGAACCGcaguuaacauggucaccauggagaugguugcaGuuCAAGAAAGCuGuGGAAGaauacagagagggccauca	49	gma-MIR396i,gma-MIR396e,gma-MIR396a,gma-MIR396h,aau-MIR396,amg-MIR396,lja-MIR396,mtr-MIR396b,cca-MIR396b,ath-MIR396a,aly-MIR396a,cpa-MIR396,cme-MIR396b,hbr-MIR396b,mes-MIR396a,mes-MIR396b,ssl-MIR396,dpr-MIR396,lus-MIR396d,lus-MIR396c,lus-MIR396a,ghr-MIR396b,ghr-MIR396a,tcc-MIR396b,tcc-MIR396a,aqc-MIR396a,bcy-MIR396a,bgy-MIR396a,mdm-MIR396b,mdm-MIR396a,csi-MIR396b,csi-MIR396a,ptc-MIR396b,ptc-MIR39…	gma-MIR396h	gaatggtctttttcgtgatcTTCCACAGCTTTCTTGAACTGtgttgtgtgaggtttctccaagtgaaggtttaagatcccttatgcaacataaattctttgagcacaATTCAAGATAGCTGTGGAAAAtcactgagatgatctcgttc	gma-miR396a-5p	TTCCACAGCTTTCTTGAACTG	5'	4	2	0	2	1222	0	1222	1146	0	1146	0	y	...(((((.(((((((((.(((.((((((((((.((((((.((((((..(((((...)))))..)))...))).)))))).)))))))))).))).))))))))))))))...	2	0	0	-57.3	44	15
pda-miR396g-3p_R-1_1ss2TG	zma-miR396g-3p_R-1_1ss2TG	GGUCAAGAAAGCUGUGGAAG	-	326	438	0	1	PDK_30s999911	20	113	-57.3	1	0	0	1	0	gp2a	1	723	692	1	gp2a	auuuggucacucucuguaauuucccACAGCuuuAuuGAACCGcaguuaacauggucaccauggagaugguugcaGuuCAAGAAAGCuGuGGAAGaauacagagagggccauca	49	gma-MIR396i,gma-MIR396e,gma-MIR396a,gma-MIR396h,aau-MIR396,amg-MIR396,lja-MIR396,mtr-MIR396b,cca-MIR396b,ath-MIR396a,aly-MIR396a,cpa-MIR396,cme-MIR396b,hbr-MIR396b,mes-MIR396a,mes-MIR396b,ssl-MIR396,dpr-MIR396,lus-MIR396d,lus-MIR396c,lus-MIR396a,ghr-MIR396b,ghr-MIR396a,tcc-MIR396b,tcc-MIR396a,aqc-MIR396a,bcy-MIR396a,bgy-MIR396a,mdm-MIR396b,mdm-MIR396a,csi-MIR396b,csi-MIR396a,ptc-MIR396b,ptc-MIR39…	zma-MIR396h	tTCCCACAGCTTTATTGAACTGcatgcacctgctgatgcgggtggaggagttgaagctgccgctcctctgagagatgcaGTTCAAGAAAGCTGTGGAAGAtcacaaagaaggccatctgattac	zma-miR396g-3p	GTTCAAGAAAGCTGTGGAAGA	3'	4	1	0	1	725	0	725	690	0	690	0	y	...(((((.(((((((((.(((.((((((((((.((((((.((((((..(((((...)))))..)))...))).)))))).)))))))))).))).))))))))))))))...	2	0	0	-57.3	44	15
pda-miR166a-5p	gma-miR166a-5p	GGAAUGUUGUCUGGCUCGAGG	+	64229	64389	0	0	PDK_30s720261	21	161	-63.2	358.5	31.5	58	242.5	26.5	gp2a	442	779	779	0	gp2a	caaggagagaggaagcuuuuucuuugaggGGAAuGuuGuCuGGCuCGAGGccaccaauucuuagagaucuucuccucuuuuuuucuguuuaagaucucgaagacaagauCuCGGACCAGGCuuCAuuCCccccaaucacagcuuccaucgucaucuccgac	242	pta-MIR166b,pta-MIR166a,pde-MIR166b,pde-MIR166a,pab-MIR166a,pab-MIR166b,ppt-MIR166j,ppt-MIR166l,ppt-MIR166k,ppt-MIR166d,ppt-MIR166c,ppt-MIR166g,ppt-MIR166f,ppt-MIR166h,ppt-MIR166a,ppt-MIR166e,ppt-MIR166i,ppt-MIR166b,ppt-MIR166m,smo-MIR166b,smo-MIR166a,smo-MIR166c,gma-MIR166l,gma-MIR166m,gma-MIR166t,gma-MIR166b,gma-MIR166a,gma-MIR166d,gma-MIR166c,gma-MIR166r,gma-MIR166g,gma-MIR166e,gma-MIR166i,gma…	gma-MIR166q	tgttaggttgagaGGAATGTTGTCTGGCTCGAGGtcatgaagatatacatatgaaagtgttaacttttcagttaatttctaggataaattaatggaaattaatttataccctaaatgattcTCGGACCAGGCTTCATTCCCCccagccaaca	gma-miR166a-5p	GGAATGTTGTCTGGCTCGAGG	5'	18880	358.5	302	56.5	274878	233190	41688.5	272818	233190	39628.5	0	y	...((((((((((((((......(((.((((((((..((((((..(((((........((((.((((((((...................)))))))).)))).....)))))..))))))..)))))))).)))....))))))).))....)))))...	4	0	0	-63.2	36	17
pda-miR166i-3p_L+2R-2	osa-miR166i-3p_L+2R-2	UCUCGGAUCAGGCUUCAUUCC	+	64229	64389	0	1	PDK_30s720261	21	161	-63.2	9120.5	1139	2194	4970.5	817	gp2a	11026	778	742	1	gp2a	caaggagagaggaagcuuuuucuuugaggGGAAuGuuGuCuGGCuCGAGGccaccaauucuuagagaucuucuccucuuuuuuucuguuuaagaucucgaagacaagauCuCGGACCAGGCuuCAuuCCccccaaucacagcuuccaucgucaucuccgac	242	pta-MIR166b,pta-MIR166a,pde-MIR166b,pde-MIR166a,pab-MIR166a,pab-MIR166b,ppt-MIR166j,ppt-MIR166l,ppt-MIR166k,ppt-MIR166d,ppt-MIR166c,ppt-MIR166g,ppt-MIR166f,ppt-MIR166h,ppt-MIR166a,ppt-MIR166e,ppt-MIR166i,ppt-MIR166b,ppt-MIR166m,smo-MIR166b,smo-MIR166a,smo-MIR166c,gma-MIR166l,gma-MIR166m,gma-MIR166t,gma-MIR166b,gma-MIR166a,gma-MIR166d,gma-MIR166c,gma-MIR166r,gma-MIR166g,gma-MIR166e,gma-MIR166i,gma…	osa-MIR166i	agataggtgtttggAATGCAGTTTGATCCAAGATCtgcctatatatatggtgtgtatatcatatcttgtgatatgggggatatgcaacaggtgtgtgacaggggtaggtagatcTCGGATCAGGCTTCATTCCTCacaccaatac	osa-miR166i-3p	TCGGATCAGGCTTCATTCCTC	3'	18880	9120.5	2113.5	7007	6.77499e+06	1.38573e+06	5389266	6.53902e+06	1.38573e+06	5153296	0	y	...((((((((((((((......(((.((((((((..((((((..(((((........((((.((((((((...................)))))))).)))).....)))))..))))))..)))))))).)))....))))))).))....)))))...	4	0	0	-63.2	36	17
pda-miR395a-5p_R-1_1ss10AG	ppe-miR395a-5p_R-1_1ss10AG	GUUCCCUCAGACACUUCAU	-	96	211	0	0	PDK_30s1086571	19	116	-62.7	154.5	11	2.5	141	0	gp2a	96	696	696	0	gp2a	caaguuggcuguccccuggaGuuCCCuCAGACACuuCAuuaggacucucucuucacuggaggagagcauaaacucuacugAAGuGuuuGGGGGAACuCuAGGuguuacccaacaua	187	pab-MIR395,ppt-MIR395,gma-MIR395c,gma-MIR395b,gma-MIR395a,gma-MIR395k,gma-MIR395g,gma-MIR395i,gma-MIR395m,gma-MIR395l,gma-MIR395f,gma-MIR395j,gma-MIR395d,gma-MIR395e,mtr-MIR395i,mtr-MIR395m,mtr-MIR395d,mtr-MIR395f,mtr-MIR395a,mtr-MIR395l,mtr-MIR395h,mtr-MIR395j,mtr-MIR395o,mtr-MIR395e,mtr-MIR395c,mtr-MIR395g,mtr-MIR395k,vun-MIR395,cca-MIR395b,cca-MIR395c,ath-MIR395d,ath-MIR395a,ath-MIR395e,bna-MI…	ppe-MIR395o	ctagaGTTCCCTCAAACACTTCATTggagattatatgcccctctctactttctatctactgaagtgtttttggggacccttag	ppe-miR395a-5p	GTTCCCTCAAACACTTCATT	5'	847	154.5	154.5	0	110216	110216	0	110216	110216	0	0	y	...(((((.((...((((((((((((((((((((((((.((((...((((((((....)))))))).......)))).))))))))))))))))))))))))...)).)))))...	0	0	0	-62.7	43	18
pda-miR395b-p3	rco-MIR395b-p3	AAGUGUUUGGGGGAACUCUAGG	-	96	211	0	0	PDK_30s1086571	22	116	-62.7	543	69	10	461.5	2.5	gp2a	129	815	815	0	gp2a	caaguuggcuguccccuggaGuuCCCuCAGACACuuCAuuaggacucucucuucacuggaggagagcauaaacucuacugAAGuGuuuGGGGGAACuCuAGGuguuacccaacaua	187	pab-MIR395,ppt-MIR395,gma-MIR395c,gma-MIR395b,gma-MIR395a,gma-MIR395k,gma-MIR395g,gma-MIR395i,gma-MIR395m,gma-MIR395l,gma-MIR395f,gma-MIR395j,gma-MIR395d,gma-MIR395e,mtr-MIR395i,mtr-MIR395m,mtr-MIR395d,mtr-MIR395f,mtr-MIR395a,mtr-MIR395l,mtr-MIR395h,mtr-MIR395j,mtr-MIR395o,mtr-MIR395e,mtr-MIR395c,mtr-MIR395g,mtr-MIR395k,vun-MIR395,cca-MIR395b,cca-MIR395c,ath-MIR395d,ath-MIR395a,ath-MIR395e,bna-MI…	rco-MIR395b	ctggagttcccctggccgcttcattggggctattatatacccttaattatacatgtgttattcctgccctaCTGAAGTGTTTGGGGGAACTCtaggt	rco-MIR395b-p3	AAGTGTTTGGGGGAACTCtagg	3'	847	543	157	386	417425	126881	290544	403432	126881	276552	0	y	...(((((.((...((((((((((((((((((((((((.((((...((((((((....)))))))).......)))).))))))))))))))))))))))))...)).)))))...	0	0	0	-62.7	43	18
pda-miR4376_L+1R-2_1ss2AT	sly-miR4376_L+1R-2_1ss2AT	UUCGCAGGAGAGAUGAUGCUG	+	18699	18792	0	0	PDK_30s893951	21	94	-46.7	328	57	4	258	9	gp2a	314	778	778	0	gp2a	caaguuuccuuCGCAGGAGAGAuGAuGCuGuggccuccucgaugguuccgcgcuuccggaccgacagcaucaucuccccggcgaggguaaccug	6	mdm-MIR3627a,mdm-MIR3627b,mdm-MIR3627c,ppe-MIR3627,sly-MIR4376,stu-MIR4376,	sly-MIR4376	aaggcttgctACGCAGGAGAGATGATGCTGGAcgatagagaaaatgggatttaatttattggccagcatcatactcctgcatattaagcct	sly-miR4376	ACGCAGGAGAGATGATGCTGGA	5'	333	328	327	1	252836	252078	758	252826	252078	747	0	y	((.(((.(((((((.((.(((((((((((((((((....((.((....)))).....)).)).))))))))))))).)).))))))).))).))	2	0	0	-46.7	35	19
pda-miR479_R-2_1ss12TC	ghr-miR479_R-2_1ss12TC	CGUGAUAUUGGCUCGGCUCA	+	18987	19100	0	1	PDK_30s65509100	20	114	-45.3	38	0	28	1	9	gp2a	33	710	672	1	gp2a	caaugagcagugaaaCGuGAuAuuGGCACGGCuCAaucaaaaaucagagcucccagccaaggagcagcguuuucaaauugaaccgggccaauaucccguucuugcggcucacac	2	ghr-MIR479,ppe-MIR171e,	ghr-MIR479	ggaggagtagacacgaCGTGATATTGGTTCGGCTCATCttattgtgattaaaaatttcaaggcgagccgaatcaatatcactcatgtatgctttttt	ghr-miR479	CGTGATATTGGTTCGGCTCATC	5'	38	38	0	38	26636	0	26636	25194	0	25194	0	y	...(((((.(..(((((.(((((((((.(((.(((((..(((((....(((((.......)))))...)))))...))))).))).))))))))).)))).)..).)))))...	2	0	0	-45.3	38	17
pda-miR167b-3p	aly-miR167b-3p	GGUCAUGCUCUGACAGCCUCACU	+	20142	20259	0	0	PDK_30s988411	23	118	-56	1	0	0.5	0.5	0	gp2a	1	888	888	0	gp2a	caggggaaugaguGAAGCuGCCAGCAuGAuCuagcuuugaaugacaaaaaaaauaugcaugcauguaauaagucauucuuugcuaGGuCAuGCuCuGACAGCCuCACuucuucccauc	144	ppt-MIR167,gma-MIR167b,gma-MIR167c,gma-MIR167e,gma-MIR167f,gma-MIR167a,gma-MIR167d,gma-MIR167g,gso-MIR167a,ahy-MIR167,lja-MIR167c,lja-MIR167a,lja-MIR167b,lja-MIR167,mtr-MIR167b,mtr-MIR167a,cca-MIR167,ath-MIR167b,ath-MIR167d,ath-MIR167a,ath-MIR167c,bna-MIR167a,bna-MIR167c,bna-MIR167d,bna-MIR167b,aly-MIR167b,aly-MIR167d,aly-MIR167a,aly-MIR167c,cpa-MIR167c,cpa-MIR167a,cpa-MIR167d,cme-MIR167f,cme-MIR…	aly-MIR167b	atctgcacaacttgttgctcaggtattttgaagacaagtccacaagggaacaagTGAAGCTGCCAGCATGATCTAtctttggttaagagatgaatgtgtaaacatattgcttaaacccaagctaGGTCATGCTCTGACAGCCTCACTccttcctggtttaggaccattcactgataaagcattccacatgccgat	aly-miR167b-3p	GGTCATGCTCTGACAGCCTCACT	3'	5288	1	1	0	819.5	819.5	0	819.5	819.5	0	0	y	...(((((..(((((.((((.((((((((((((((...(((((((.......(((((....))))).....)))))))...)))))))))))))..).)))).)))))..)))))...	2	2	1	-56	40	17
pda-miR167a_R-2	gma-miR167a_R-2	UGAAGCUGCCAGCAUGAUC	+	20142	20259	0	0	PDK_30s988411	19	118	-56	5211.5	263.5	35.5	4907	5.5	gp2a	4640	702	702	0	gp2a	caggggaaugaguGAAGCuGCCAGCAuGAuCuagcuuugaaugacaaaaaaaauaugcaugcauguaauaagucauucuuugcuaGGuCAuGCuCuGACAGCCuCACuucuucccauc	144	ppt-MIR167,gma-MIR167b,gma-MIR167c,gma-MIR167e,gma-MIR167f,gma-MIR167a,gma-MIR167d,gma-MIR167g,gso-MIR167a,ahy-MIR167,lja-MIR167c,lja-MIR167a,lja-MIR167b,lja-MIR167,mtr-MIR167b,mtr-MIR167a,cca-MIR167,ath-MIR167b,ath-MIR167d,ath-MIR167a,ath-MIR167c,bna-MIR167a,bna-MIR167c,bna-MIR167d,bna-MIR167b,aly-MIR167b,aly-MIR167d,aly-MIR167a,aly-MIR167c,cpa-MIR167c,cpa-MIR167a,cpa-MIR167d,cme-MIR167f,cme-MIR…	gma-MIR167d	aagggtcacaagggaaaaagTGAAGCTGCCAGCATGATCTAgctttggttagtgggagccagagagtgctaaccctcactaggtcatgctgtgctagcctcactccttcctatttggagac	gma-miR167a	TGAAGCTGCCAGCATGATCTA	5'	5288	5211.5	5211.5	0	3673190	3673190	0	3673190	3673190	0	0	y	...(((((..(((((.((((.((((((((((((((...(((((((.......(((((....))))).....)))))))...)))))))))))))..).)))).)))))..)))))...	2	2	1	-56	40	17
pda-miR916-p3	cre-MIR916-p3	UAGCUCAGUUGGUUA	+	26317	26411	0	0	PDK_30s901931	15	95	-33	6	1	0	3	2	gp2a	3	535	535	0	gp2a	cauccuuguguauaaguugucucagcuagcucuaaaucagcauaagcuggaauAGCuCAGuuGGuuAgagcguguggcuguuaaccacaaggucg	1	cre-MIR916,	cre-MIR916	acggaaacggttgtacggggcgccgtacggtggttgtgggagaggggggggctggtggatatgacgtgggcctgttagctcagttggttagagcgtggtgctaataacgCCAAGGTCATCGGTTCGATCCcgatacgggccagcggaagccttttgggccacgcgcccacgctgcaatacgcgcacgagaggccttaaggatgtaaggcctatatgcctggtcggacgggcggtcagacgacatttgggggttcgggggcgctcggggctatgtatgttgtggtgggagtcctgtcatggtattggggatggaaaggcacacagacgggaaacatgcaaagctgtggagggtatggataagccgctgcatgaaccacataactgtggagggcagccgct…	cre-MIR916-p3	tagctcagttggtta	3'	6	6	6	0	3438	3438	0	3438	3438	0	0	y	...(((((((.....((((...(((((((((((.(((((((...(((((...)))))..))))))))))))...)))))).)))))))))))...	5	1	2	-33	34	13
pda-miR166a_R-2	pta-miR166a_R-2	UCGGACCAGGCUUCAUUCC	+	12214	12331	0	0	PDK_30s1090931	19	118	-56.8	3400	381.5	122.5	2840	56	gp2a	2606	701	701	0	gp2a	caugauaguugaggGGAAuGuuGuCuGGGuCgaagccguucgcaugaagagcaccaucagaugcugaucucucuuccaagggaaugguuuCGGACCAGGCuuCAuuCCcccuaucuca	240	pta-MIR166b,pta-MIR166a,pde-MIR166b,pde-MIR166a,pab-MIR166a,pab-MIR166b,ppt-MIR166j,ppt-MIR166d,ppt-MIR166c,ppt-MIR166g,ppt-MIR166l,ppt-MIR166k,ppt-MIR166f,ppt-MIR166h,ppt-MIR166a,ppt-MIR166e,ppt-MIR166i,ppt-MIR166b,ppt-MIR166m,smo-MIR166b,smo-MIR166a,smo-MIR166c,gma-MIR166m,gma-MIR166t,gma-MIR166b,gma-MIR166a,gma-MIR166d,gma-MIR166c,gma-MIR166r,gma-MIR166g,gma-MIR166e,gma-MIR166i,gma-MIR166p,gma…	pta-MIR166a	ttgattgaggggaatgttgtctggctcgacttcatccggatttgggctccaatgttcggatgccgTCGGACCAGGCTTCATTCCCCccaatcgg	pta-miR166a	TCGGACCAGGCTTCATTCCCC	3'	6379	3400	2730	670	2304640	1.80216e+06	502482	2287328	1.80216e+06	485170	0	y	...(((((....((((((((..((((((..(((((((((((....((((((....(((((...)))))..)))))).....)))))))))))..))))))..)))))))))))))...	4	0	0	-56.8	41	13
pda-miR166a-5p_R-4_1ss15CT	gma-miR166a-5p_R-4_1ss15CT	GGAAUGUUGUCUGGUUC	+	12214	12331	0	1	PDK_30s1090931	17	118	-56.8	7	1	0	6	0	gp2a	9	607	570	1	gp2a	caugauaguugaggGGAAuGuuGuCuGGGuCgaagccguucgcaugaagagcaccaucagaugcugaucucucuuccaagggaaugguuuCGGACCAGGCuuCAuuCCcccuaucuca	240	pta-MIR166b,pta-MIR166a,pde-MIR166b,pde-MIR166a,pab-MIR166a,pab-MIR166b,ppt-MIR166j,ppt-MIR166d,ppt-MIR166c,ppt-MIR166g,ppt-MIR166l,ppt-MIR166k,ppt-MIR166f,ppt-MIR166h,ppt-MIR166a,ppt-MIR166e,ppt-MIR166i,ppt-MIR166b,ppt-MIR166m,smo-MIR166b,smo-MIR166a,smo-MIR166c,gma-MIR166m,gma-MIR166t,gma-MIR166b,gma-MIR166a,gma-MIR166d,gma-MIR166c,gma-MIR166r,gma-MIR166g,gma-MIR166e,gma-MIR166i,gma-MIR166p,gma…	gma-MIR166l	tttccttgcaaaggtgaggttgagaGGAATGTTGTCTGGCTCGAGGtcatggaggaggagagtactcagatgagtgaaagtttccaatggaaatttaccctcttaacaccaaaaaaaaaaaaaaaattgattctgggaccaggcttcatttcccccatccaacttttgttttttattcc	gma-miR166a-5p	GGAATGTTGTCTGGCTCGAGG	5'	6379	7	2.5	4.5	4561	1829.5	2731.5	4394.5	1829.5	2565	0	y	...(((((....((((((((..((((((..(((((((((((....((((((....(((((...)))))..)))))).....)))))))))))..))))))..)))))))))))))...	4	0	0	-56.8	41	13
pda-miR169_R-3_1ss14CT	pde-miR169_R-3_1ss14CT	CAGCCAAGGAUGAUUUGC	-	1629	1764	0	0	PDK_30s891391	18	136	-57.1	5.5	0	0	5.5	0	gp2a	3	639	639	0	gp2a	caugcaugaaaaggcagaaaguggagugCAGCCAAGGAuGAuuuGCuagcauuaaucugccaagagaagagaccuuuucuguuaauuccuagaagguuguccuuggcuacauuuggcuuucuucuucucaugcugg	98	pde-MIR169,gma-MIR169b,gma-MIR169g,gma-MIR169v,gma-MIR169f,gma-MIR169u,gma-MIR169a,gma-MIR169m,mtr-MIR169a,mtr-MIR169g,mtr-MIR169b,mtr-MIR169l,vun-MIR169,cca-MIR169b,ath-MIR169b,ath-MIR169c,ath-MIR169a,bna-MIR169b,bna-MIR169n,bna-MIR169a,aly-MIR169c,aly-MIR169b,aly-MIR169a,cme-MIR169h,cme-MIR169f,mes-MIR169c,mes-MIR169e,mes-MIR169g,mes-MIR169b,mes-MIR169d,mes-MIR169a,rco-MIR169b,rco-MIR169a,lus-M…	pde-MIR169	actatttattCAGCCAAGGATGACTTGCCTAgatcttgttaccagtatcggctagttatgctgatatcgatttcagtcactaggtgagtcgtccttggctaaa	pde-miR169	CAGCCAAGGATGACTTGCCTA	5'	6	5.5	4	1.5	3569	2639	930	3541.5	2639	902.5	0	y	((.((((((.((((.(((((((..((((.(((((((((..(..(.((((.((((((......(((((((....)))))))))))))..)))).)..)..))))))))).))))..))))))))))).)))))))).	4	0	0	-57.1	51	12
pda-miR6300_R+1	gma-miR6300_R+1	GUCGUUGUAGUAUAGUGGU	+	1644	1715	0	0	PDK_30s1114651	19	72	-15.2	13173	1784	1487	8958	944	gp2a	6027	695	695	0	gp2a	cauggauuauguagccauuaaguaucuuaauguuugaauuGuCGuuGuAGuAuAGuGGugaguauucccgcc	1	gma-MIR6300,	gma-MIR6300	aggtaaaaatacttaccactatattacaacaacttgtttgtgaaattcaatggtaattttaaataataaatgttttaatattaccgatagcatttgattatatttttgttttaaagttacatttgattatatcgctatcggctataatgtaagtcatattcatccaatatcatgcaacttttttgtatagatatattaatattactcgataatcatcaaGTCGTTGTAGTATAGTGGtaagtattcccgcc	gma-miR6300	GTCGTTGTAGTATAGTGG	3'	13173	13173	13173	0	10676838	10676838	0	10676838	10676838	0	0	y	...(((.(((...((((((..((((..(((((..........)))))..))))))))))..))).)))....	4	2	1	-15.2	21	15
pda-miR167a_R-1_1ss19CT	gma-miR167a_R-1_1ss19CT	UGAAGCUGCCAGCAUGAUUU	-	21735	21889	0	1	PDK_30s65509419	20	155	-53.3	401.5	70.5	4	325.5	1.5	gp2a	133	740	701	1	gp2a	cauggcuucucuuggugcaccacaaguugcuGAAGCuGCCAGCAuGAuCugaucucuccucuauccuugugaucuugauuuuuuuuuuuccaaaagaagcccaucAGAuCAuCuGGCAGuuuCAuCuacugaugggagcacaaagaaaacccuaa	142	gma-MIR167b,gma-MIR167c,gma-MIR167e,gma-MIR167f,gma-MIR167a,gma-MIR167d,gma-MIR167g,gso-MIR167a,ahy-MIR167,lja-MIR167c,lja-MIR167a,lja-MIR167b,lja-MIR167,mtr-MIR167b,mtr-MIR167a,cca-MIR167,ath-MIR167b,ath-MIR167d,ath-MIR167a,bna-MIR167a,bna-MIR167c,bna-MIR167d,bna-MIR167b,aly-MIR167b,aly-MIR167d,aly-MIR167a,cpa-MIR167c,cpa-MIR167a,cpa-MIR167d,cme-MIR167f,cme-MIR167b,cme-MIR167d,cme-MIR167a,cme-MI…	gma-MIR167d	aagggtcacaagggaaaaagTGAAGCTGCCAGCATGATCTAgctttggttagtgggagccagagagtgctaaccctcactaggtcatgctgtgctagcctcactccttcctatttggagac	gma-miR167a	TGAAGCTGCCAGCATGATCTA	5'	951	401.5	8.5	393	316692	6428	310264	304008	6428	297580	0	y	...((.((.((((.((((.(((..(((...((((((((((((.((((((((((.........(((.....)))......((((((((....))))))))...))))))))))))))))))))))...)))..)))..)))).)))).)).))...	1	1	1	-53.3	40	19
pda-miR160a_L+1R-1	pab-miR160a_L+1R-1	CUGCCUGGCUCCCUGUAUGCC	-	27445	27619	0	1	PDK_30s679681	21	175	-84.6	16.5	1	1	14.5	0	gp2a	21	787	748	1	gp2a	cauguagguugcauaugauguccaguguggcuuacaggauggguCuGCCuGGCuCCCuGAAuGCCaucuaagaugguucgucaaaaggguugaugcacuuccuaguuggcauucggggagucaugcagaccuuuuaaccaaucauggcgacugguuucaggugcacuccuacuac	21	pab-MIR160b,ppt-MIR160f,ppt-MIR160a,ppt-MIR160e,smo-MIR160a,smo-MIR160b,ahy-MIR160,mtr-MIR160c,cpa-MIR160d,cme-MIR160d,mes-MIR160f,mes-MIR160e,rco-MIR160c,tcc-MIR160a,ptc-MIR160f,ptc-MIR160e,vvi-MIR160a,vvi-MIR160b,bdi-MIR160e,osa-MIR160f,sbi-MIR160f,	pab-MIR160b	gttgggggcaccgcttatcTGCCTGGCTCCCTGTATGCCAtctgcgttgcttatcaagagcgggatatgcctcacagttggcatagagagagccaagcagaactgctgtttctagc	pab-miR160a	TGCCTGGCTCCCTGTATGCCA	5'	32	16.5	6	10.5	12778.5	4515	8263.5	12369	4515	7854	0	y	...(((((.((((..(((...(((((...(((....((..((((((((.(((((((((((((((((.(((.((.(((.((((((.....)))))).))))).))).))))))))))))))))).)))))))).....))......))).)))))..)))..))))..)))))...	2	0	0	-84.6	61	20
pda-miR394a-5p	gma-miR394a-5p	UUGGCAUUCUGUCCACCUCC	+	8952	9107	0	0	PDK_30s802931	20	156	-65.5	34	2.5	1.5	27	3	gp2a	64	738	738	0	gp2a	cauguggguuugucaaagcgguucuugcagaguuuauuGGCAuuCuGuCCACCuCCauuagggccaagguggcaugggguuggaggcaauagaaauggaucaggugggcaaccugccaaaggAGCuCuGuuGGAuuCuCuuuGcgaaacccauugu	47	gma-MIR394g,gma-MIR394d,gma-MIR394f,gma-MIR394b,gma-MIR394e,gma-MIR394a,gma-MIR394c,ahy-MIR394,cca-MIR394,ath-MIR394b,ath-MIR394a,bna-MIR394b,bna-MIR394a,aly-MIR394b,aly-MIR394a,cpa-MIR394b,cpa-MIR394a,cme-MIR394a,cme-MIR394b,mes-MIR394c,mes-MIR394a,mes-MIR394b,ssl-MIR394,lus-MIR394b,lus-MIR394a,ghr-MIR394b,ghr-MIR394a,tcc-MIR394a,tcc-MIR394b,mdm-MIR394b,mdm-MIR394a,ppe-MIR394a,ppe-MIR394b,csi-MI…	gma-MIR394c	cagagtttcTTGGCATTCTGTCCACCTCCacttccactttcagttccatggatctctctctctttttggccctatctacgtactcggaggtggacatactgccaatagag	gma-miR394a-5p	TTGGCATTCTGTCCACCTCC	5'	90	34	34	0	24747	24747	0	24747	24747	0	0	y	...((((((((..(((((.(..((..(((((((((.((((((...((((((((((((((...(((.....))).....((((....))))...))))))...))))))))...))))))..)))))))))..))..).)))))..))))))))...	6	3	1	-65.5	45	17
pda-miR394a-p3	mdm-MIR394a-p3	AGCUCUGUUGGCUUCUCUUUG	+	8952	9107	0	1	PDK_30s802931	21	156	-65.5	11	0	0	11	0	gp2a	21	789	751	1	gp2a	cauguggguuugucaaagcgguucuugcagaguuuauuGGCAuuCuGuCCACCuCCauuagggccaagguggcaugggguuggaggcaauagaaauggaucaggugggcaaccugccaaaggAGCuCuGuuGGAuuCuCuuuGcgaaacccauugu	47	gma-MIR394g,gma-MIR394d,gma-MIR394f,gma-MIR394b,gma-MIR394e,gma-MIR394a,gma-MIR394c,ahy-MIR394,cca-MIR394,ath-MIR394b,ath-MIR394a,bna-MIR394b,bna-MIR394a,aly-MIR394b,aly-MIR394a,cpa-MIR394b,cpa-MIR394a,cme-MIR394a,cme-MIR394b,mes-MIR394c,mes-MIR394a,mes-MIR394b,ssl-MIR394,lus-MIR394b,lus-MIR394a,ghr-MIR394b,ghr-MIR394a,tcc-MIR394a,tcc-MIR394b,mdm-MIR394b,mdm-MIR394a,ppe-MIR394a,ppe-MIR394b,csi-MI…	mdm-MIR394a	tcacgtgggttttgcaaagagtttcttacagagttctTTGGCATTCTGTCCACCTCCcccctctctctgtgtgtctgtggctcaatggatggaggtgggcatactgccaacagagctctgttggcttctctttgtaaaacccccgtga	mdm-MIR394a-p3	agctctgttggcttctctttg	3'	90	11	0	11	8669	0	8669	8250.5	0	8250.5	0	y	...((((((((..(((((.(..((..(((((((((.((((((...((((((((((((((...(((.....))).....((((....))))...))))))...))))))))...))))))..)))))))))..))..).)))))..))))))))...	6	3	1	-65.5	45	17
pda-miR395g_R-1	mtr-miR395g_R-1	UUGAAGUGUUUGGGGGAACU	+	34106	34273	0	1	PDK_30s849361	20	168	-51.3	3	0	0	3	0	gp2a	6	716	678	1	gp2a	ccauagaggaggaggagcuggaguauucagcacugauauaacaauuucugguggauuugauucuucaacaacguucucugcugcagaucuagacucacuggcugaggaucccauggcuccuuGAAGuGuuuGGGAGAACuccaagaguuccuugcucucucucuguuu	3	mtr-MIR395g,cme-MIR395b,cme-MIR395c,	mtr-MIR395g	gagttcctctgaacgcttcatataagaggttatccatcttcaTTGAAGTGTTTGGGGGAACTC	mtr-miR395g	TTGAAGTGTTTGGGGGAACTC	3'	6	3	0	3	2148	0	2148	2034	0	2034	0	y	.((.((((((((((((((((((((.(((((((((.............(..(((..((((..(((.((.((........)).)).)))..))))..)))..)..(((((.((...)).)))))..))))))..)))..)))))...)))))))).))).)))).))...	3	2	2	-51.3	31	14
pda-miR529e	ppt-miR529e	AGAAGAGAGAGAGUACAGCCC	-	24609	24718	0	1	PDK_30s1162881	21	110	-56.2	8.5	0.5	0	7	1	gp2a	17	766	729	1	gp2a	ccaucaaaaaugaccaaaaggAGAAGAGAGAGGGuACAGCCCcuccagcucugacugcacugagaacugaggcuguacucucucucuucucccaugggucuucuugauuu	2	ppt-MIR529f,ppt-MIR529e,	ppt-MIR529e	tcagcaatttactcactcatgctgggatcAGAAGAGAGAGAGTACAGCCCaagagcaaccgcttagttggaatgggctgtgctctctctcttctggttccaacctgagtgcatgtcggttgt	ppt-miR529e	AGAAGAGAGAGAGTACAGCCC	5'	17	8.5	0	8.5	6511	0	6511	6196.5	0	6196.5	0	y	..(((((.((.((((....((((((((((((((((((((((....(((.(((..........))).))).))))))))))))))))))))))....)))))).)))))..	0	0	0	-56.2	39	20
pda-miR395a-5p_L-1_1ss10AG	ppe-miR395a-5p_L-1_1ss10AG	UUCCCUCAGACACUUCAUU	-	207073	207160	0	0	PDK_30s6550926	19	88	-52.3	0.5	0	0.5	0	0	gp2a	1	727	727	0	gp2a	ccccuggaguuCCCuCAGACACuuCAuuaggccucuuucaugggaggagcaaacccuaCuGAAGuGuuuGGGGGAACucuggguguca	184	pab-MIR395,ppt-MIR395,gma-MIR395c,gma-MIR395b,gma-MIR395a,gma-MIR395g,gma-MIR395i,gma-MIR395m,gma-MIR395k,gma-MIR395l,gma-MIR395f,gma-MIR395j,gma-MIR395d,gma-MIR395e,mtr-MIR395i,mtr-MIR395m,mtr-MIR395d,mtr-MIR395f,mtr-MIR395a,mtr-MIR395l,mtr-MIR395h,mtr-MIR395j,mtr-MIR395o,mtr-MIR395e,mtr-MIR395c,mtr-MIR395g,mtr-MIR395k,vun-MIR395,cca-MIR395b,cca-MIR395c,ath-MIR395d,ath-MIR395a,ath-MIR395e,bna-MI…	ppe-MIR395o	ctagaGTTCCCTCAAACACTTCATTggagattatatgcccctctctactttctatctactgaagtgtttttggggacccttag	ppe-miR395a-5p	GTTCCCTCAAACACTTCATT	5'	256	0.5	0.5	0	363.5	363.5	0	363.5	363.5	0	0	y	..((..((((((((((((((((((((.((((.((((((.....)))))).....)))).))))))))))))))))))))..)).....	2	0	0	-52.3	32	18
pda-miR395_R-1_2ss14AG20TG	pab-miR395_R-1_2ss14AG20TG	CUGAAGUGUUUGGGGGAACG	-	207073	207160	0	1	PDK_30s6550926	20	88	-52.3	146.5	8.5	3	135	0	gp2a	41	736	697	1	gp2a	ccccuggaguuCCCuCAGACACuuCAuuaggccucuuucaugggaggagcaaacccuaCuGAAGuGuuuGGGGGAACucuggguguca	184	pab-MIR395,ppt-MIR395,gma-MIR395c,gma-MIR395b,gma-MIR395a,gma-MIR395g,gma-MIR395i,gma-MIR395m,gma-MIR395k,gma-MIR395l,gma-MIR395f,gma-MIR395j,gma-MIR395d,gma-MIR395e,mtr-MIR395i,mtr-MIR395m,mtr-MIR395d,mtr-MIR395f,mtr-MIR395a,mtr-MIR395l,mtr-MIR395h,mtr-MIR395j,mtr-MIR395o,mtr-MIR395e,mtr-MIR395c,mtr-MIR395g,mtr-MIR395k,vun-MIR395,cca-MIR395b,cca-MIR395c,ath-MIR395d,ath-MIR395a,ath-MIR395e,bna-MI…	pab-MIR395	ctcacagctggttctcaatgccgggagttccttcaatcacttcgccgaatccgaaagcatttcaCTGAAGTGTTTGGAGGAACTTcgggcgtcactgaactgc	pab-miR395	CTGAAGTGTTTGGAGGAACTT	3'	256	146.5	10.5	136	106693	7858	98835	102268	7858	94409.5	0	y	..((..((((((((((((((((((((.((((.((((((.....)))))).....)))).))))))))))))))))))))..)).....	2	0	0	-52.3	32	18
pda-miR396b_L-5_1ss13AC	cca-miR396b_L-5_1ss13AC	CAGCUUUCUUGAACUG	+	46561	46664	0	0	PDK_30s756541	16	104	-47	22642	1219.5	588	20684	150.5	gp2a	38611	586	586	0	gp2a	ccucuuuguagucuuccaCAGCuuuCuuGAACuGcauccauccuuguaugcuaggugcuuugaguugcaGuuCAAuAAAGCuGuGGGAAAuuacagagcgagac	109	pta-MIR396,pab-MIR396a,pab-MIR396c,pab-MIR396b,gma-MIR396c,gma-MIR396g,gma-MIR396b,gma-MIR396f,gma-MIR396d,gma-MIR396k,gma-MIR396j,gma-MIR396i,gma-MIR396e,gma-MIR396a,gma-MIR396h,aau-MIR396,amg-MIR396,lja-MIR396,mtr-MIR396a,mtr-MIR396c,mtr-MIR396b,cca-MIR396a,cca-MIR396c,cca-MIR396b,ath-MIR396b,ath-MIR396a,bna-MIR396a,aly-MIR396b,aly-MIR396a,cpa-MIR396,cme-MIR396e,cme-MIR396c,cme-MIR396a,cme-MIR3…	cca-MIR396b	ctatctTCCCACAGCTTTATTGAACTGcaaaggtttaagtacaaaaaaaaggacagatccaacagatcaacattgaaccatgcagttcaagaaagctgtggaagaacaga	cca-miR396b	TCCCACAGCTTTATTGAACTG	5'	45497	22642	22073.5	568.5	13621681	13196722	424959	1.36063e+07	13196722	409572	0	y	.(((((((((((.((((((((((((.((((((((((....((...((((.....))))...))..)))))))))).)))))))))))).))))))))..)))..	2	0	0	-47	39	15
pda-miR396a-3p_L+1_1ss21GA	gma-miR396a-3p_L+1_1ss21GA	GUUCAAUAAAGCUGUGGGAAA	+	46561	46664	0	0	PDK_30s756541	21	104	-47	148	17.5	21	94.5	15	gp2a	170	774	774	0	gp2a	ccucuuuguagucuuccaCAGCuuuCuuGAACuGcauccauccuuguaugcuaggugcuuugaguugcaGuuCAAuAAAGCuGuGGGAAAuuacagagcgagac	109	pta-MIR396,pab-MIR396a,pab-MIR396c,pab-MIR396b,gma-MIR396c,gma-MIR396g,gma-MIR396b,gma-MIR396f,gma-MIR396d,gma-MIR396k,gma-MIR396j,gma-MIR396i,gma-MIR396e,gma-MIR396a,gma-MIR396h,aau-MIR396,amg-MIR396,lja-MIR396,mtr-MIR396a,mtr-MIR396c,mtr-MIR396b,cca-MIR396a,cca-MIR396c,cca-MIR396b,ath-MIR396b,ath-MIR396a,bna-MIR396a,aly-MIR396b,aly-MIR396a,cpa-MIR396,cme-MIR396e,cme-MIR396c,cme-MIR396a,cme-MIR3…	gma-MIR396a	tcatggctctctttgtattcTTCCACAGCTTTCTTGAACTGcatccaaagagttcctttgcatgcatgccatggcactcttactcccaaatcttgttttgcggTTCAATAAAGCTGTGGGAAGatacagatagggtcaac	gma-miR396a-3p	TTCAATAAAGCTGTGGGAAG	3'	45497	148	142.5	5.5	111524	107210	4313.5	111328	107210	4118.5	0	y	.(((((((((((.((((((((((((.((((((((((....((...((((.....))))...))..)))))))))).)))))))))))).))))))))..)))..	2	0	0	-47	39	15
pda-miR535_R-4	pab-miR535_R-4	UGACAACGAGAGAGAGC	+	3664	3765	0	0	PDK_30s939421	17	102	-53.5	491	90	12	382.5	6.5	gp2a	209	617	617	0	gp2a	ccuggcuuugguuGACAACGAGAGAGAGCacgcuggucggcaaucaugcuuggggccauGAGuGuGuACuGGCGuGCuccuucucguugucacucagcuuca	20	pab-MIR535,ppt-MIR535c,ppt-MIR535d,ppt-MIR535a,ppt-MIR535b,cpa-MIR535,mes-MIR535b,mes-MIR535a,rco-MIR535,tcc-MIR535,aqc-MIR535,mdm-MIR535b,mdm-MIR535c,mdm-MIR535a,mdm-MIR535d,ppe-MIR535b,ppe-MIR535a,vvi-MIR535a,vvi-MIR535c,osa-MIR535,	pab-MIR535	aaatatccgttctattccattgcTGACAACGAGAGAGAGCACGCctgtattctcttatatgaattttgcatatgtgggcgtccatgcgtgctctctgcttgtagtcagcaaagcgactgcatctcaact	pab-miR535	TGACAACGAGAGAGAGCACGC	5'	835	491	377	114	329694	251335	78358.5	325686	251335	74351	0	y	...((((..((.(((((((((((..((((((((..((..(((.((((((.....).))))).)))..))..))))))))..))))))))))))).))))...	4	0	0	-53.5	36	15
pda-miR168a_R+1	gma-miR168a_R+1	UCGCUUGGUGCAGGUCGGGAAC	-	19868	20010	0	0	PDK_30s855641	22	143	-65.3	25.5	3	1.5	18	3	gp2a	16	794	794	0	gp2a	ccuuguuuguuauauggucgccgccgccucugauuCGCuuGGuGCAGGuCGGGAACgcuccaagacgccggcguaugagacggauCCCGCCuuGCAuCAACuGAAuuggaggcggaacgcgacgauuucucuaccauccaucc	41	gma-MIR168a,gma-MIR168b,mtr-MIR168b,mtr-MIR168c,vun-MIR168,cca-MIR168a,ath-MIR168b,ath-MIR168a,bna-MIR168a,bna-MIR168b,aly-MIR168b,aly-MIR168a,cme-MIR168,mes-MIR168a,rco-MIR168,lus-MIR168a,lus-MIR168b,tcc-MIR168,mdm-MIR168b,mdm-MIR168a,ppe-MIR168,crt-MIR168,ccl-MIR168,ptc-MIR168a,ptc-MIR168b,sly-MIR168b,sly-MIR168a,nta-MIR168d,nta-MIR168a,nta-MIR168e,nta-MIR168c,nta-MIR168b,vvi-MIR168,bdi-MIR168,…	gma-MIR168b	cggtctctaatTCGCTTGGTGCAGGTCGGGAAccggttttcgcgcggaatggaggaacggtcgccggcggcgaattggatcccgccttgcatcaactgaatcggaggccg	gma-miR168a	TCGCTTGGTGCAGGTCGGGAA	5'	409	25.5	9	16.5	19190	7324	11866	18655.5	7324	11331.5	0	y	...((..((....((.(((((..(((((((..((((..((((((((((.(((((.(((((....(((....)))..))).))..))))).))))))))))..))))..)))))))...))))).))........))..))...	4	1	1	-65.3	45	18
pda-miR168c-3p	mtr-miR168c-3p	CCCGCCUUGCAUCAACUGAAU	-	19868	20010	0	0	PDK_30s855641	21	143	-65.3	180	6.5	20	126.5	27	gp2a	151	786	786	0	gp2a	ccuuguuuguuauauggucgccgccgccucugauuCGCuuGGuGCAGGuCGGGAACgcuccaagacgccggcguaugagacggauCCCGCCuuGCAuCAACuGAAuuggaggcggaacgcgacgauuucucuaccauccaucc	41	gma-MIR168a,gma-MIR168b,mtr-MIR168b,mtr-MIR168c,vun-MIR168,cca-MIR168a,ath-MIR168b,ath-MIR168a,bna-MIR168a,bna-MIR168b,aly-MIR168b,aly-MIR168a,cme-MIR168,mes-MIR168a,rco-MIR168,lus-MIR168a,lus-MIR168b,tcc-MIR168,mdm-MIR168b,mdm-MIR168a,ppe-MIR168,crt-MIR168,ccl-MIR168,ptc-MIR168a,ptc-MIR168b,sly-MIR168b,sly-MIR168a,nta-MIR168d,nta-MIR168a,nta-MIR168e,nta-MIR168c,nta-MIR168b,vvi-MIR168,bdi-MIR168,…	mtr-MIR168c	ctcacttcgcggtctctaatTCGCTTGGTGCAGGTCGGGAAccactacatccgctgttttcgtagaaaccggcggtgaattggatCCCGCCTTGCATCAACTGAATcggaggccgcggtgaatcta	mtr-miR168c-3p	CCCGCCTTGCATCAACTGAAT	3'	409	180	158	22	138994	122470	16524	138381	122470	15911	0	y	...((..((....((.(((((..(((((((..((((..((((((((((.(((((.(((((....(((....)))..))).))..))))).))))))))))..))))..)))))))...))))).))........))..))...	4	1	1	-65.3	45	18
pda-miR171	pde-miR171	UGAUUGAGCCGUGCCAAUAUC	-	8274	8396	0	0	PDK_30s886631	21	123	-53	725.5	57	4.5	651.5	12.5	gp2a	1376	777	777	0	gp2a	cgaaugaaauaguuacuaugauGuuGGCCCGGuuCACuCAGAaaacgcuccuagggcaacacgaaggcuuuagacccugcguucuGAuuGAGCCGuGCCAAuAuCuuaguacucuuucauccu	141	pde-MIR171,smo-MIR171a,smo-MIR171b,gma-MIR171u,gma-MIR171c,gma-MIR171g,gma-MIR171o,gma-MIR171e,gma-MIR171j,gma-MIR171f,gma-MIR171q,gma-MIR171a,gma-MIR171i,lja-MIR171a,mtr-MIR171d,mtr-MIR171f,mtr-MIR171c,htu-MIR171a,hpa-MIR171a,ath-MIR171c,ath-MIR171b,ath-MIR170,ath-MIR171a,bna-MIR171e,bna-MIR171d,bna-MIR171b,bna-MIR171c,bna-MIR171a,bna-MIR171f,bna-MIR171g,bra-MIR171a,aly-MIR171c,aly-MIR171b,aly-M…	pde-MIR171	gaaagaatgtgatgttggctaggctcaatcggattgtaacgcccacggaatttggtcttgtgatcTGATTGAGCCGTGCCAATATCacattctaac	pde-miR171	TGATTGAGCCGTGCCAATATC	3'	1441	725.5	703	22.5	561998	544672	17326	561242	544672	16570.5	0	y	...((((((.((.(((((.(((((((((.(((((((.(((((..((((..(((..((.........))..))).....))))))))).))))))).))))))))).))))))).))))))...	2	0	0	-53	43	19
pda-miR172a	gma-miR172a	AGAAUCUUGAUGAUGCUGCAU	+	7172	7272	0	0	PDK_30s1019081	21	101	-48.1	48	2	1.5	44	0.5	gp2a	59	784	784	0	gp2a	cgauguuugcagguGuGGCAuCAuCAAGAuuCACauuggucugagcagccgcagucugauccuuaaugAGAAuCuuGAuGAuGCuGCAucagcaaauaagc	132	gma-MIR172b,gma-MIR172f,gma-MIR172a,gma-MIR172h,gma-MIR172g,gma-MIR172j,gma-MIR172i,gma-MIR172d,gma-MIR172k,gma-MIR172c,gma-MIR172l,gma-MIR172e,aau-MIR172,lja-MIR172b,lja-MIR172c,lja-MIR172a,mtr-MIR172c,mtr-MIR172b,mtr-MIR172d,vun-MIR172,cca-MIR172,ath-MIR172a,ath-MIR172b,ath-MIR172c,ath-MIR172d,ath-MIR172e,bna-MIR172a,bna-MIR172d,bna-MIR172b,bna-MIR172c,bra-MIR172b,bra-MIR172a,aly-MIR172b,aly-MI…	gma-MIR172j	gcaggtGCAGCAGCATCAAGATTCACAcacagattccacctccttgggggagtgtttaggtgctgAGAATCTTGATGATGCTGCATcagc	gma-miR172a	AGAATCTTGATGATGCTGCAT	3'	104	48	48	0	36608.5	36608.5	0	36608.5	36608.5	0	0	y	...(((((((.((((..(((((((((((((((.((((((((.((((....))..)).))))...)))).)))))))))))))))..)))).)))))))...	4	0	0	-48.1	38	17
pda-miR399d	gma-miR399d	UGCCAAAGGAGAUUUGCCCAG	+	10836	10967	0	0	PDK_30s868971	21	132	-64.4	2	0	0	2	0	gp2a	2	715	715	0	gp2a	cgggcguggauuaccgggccaacucuccugaggcagcgguacgcucgccggccauuugguacgugaggcguaucgguccuggaggagcagacccgcuGCCAAAGGAGAuuuGCCCAGcaauccauccgcaag	17	gma-MIR399d,gma-MIR399g,gma-MIR399e,gma-MIR399f,mtr-MIR399e,mtr-MIR399g,mtr-MIR399a,mtr-MIR399f,mtr-MIR399s,rco-MIR399e,lus-MIR399g,lus-MIR399f,osa-MIR399e,osa-MIR399g,osa-MIR399f,sbi-MIR399e,sbi-MIR399f,	gma-MIR399f	tgggtgcattacagggcaagttctctttggcaggtatcaagaagctattaatgctatacaagtgtacgtgtgcaaccTGCCAAAGGAGATTTGCCCAGcaattctcct	gma-miR399d	TGCCAAAGGAGATTTGCCCAG	3'	2	2	2	0	1430	1430	0	1430	1430	0	0	y	(((..(((((((...(((.(((.((((((..((((((((...((((.((((((....((((((.....)))))))).)).))..))))....))))))))..)))))).))))))...))))))))))....	4	1	1	-64.4	46	16
pda-miR2916_R-3_1ss6AG	peu-miR2916_R-3_1ss6AG	UGGGGGCUCGAAGACGAUCA	-	458	557	0	1	M01000071789	20	100	-31.5	2636	154	1069	813	600	gp2a	471	737	699	1	gp2a	cguuGGGGGCuCGAAGACGAuCucagcuaaaauucuggaagaagcacuguucuuugucacuggggaagauagcgagcagauuuauguugagcucccaucc	1	peu-MIR2916,	peu-MIR2916	TGGGGACTCGAAGACGATCATATaccatcctagtctcaaccataaacgatgccgaccagggattggcggatgttgcttctaggagtccgcca	peu-miR2916	TGGGGACTCGAAGACGATCATAT	5'	2636	2636	1609	1027	1702775	989403	713372	1663904	989403	674501	0	y	...(((((((((((....(((((..((((...((((...((..(((........)))..))..))))..))))....)))))....)))))))))))...	8	0	0	-31.5	29	16
pda-miR160a_L+1R-1	pab-miR160a_L+1R-1	CUGCCUGGCUCCCUGUAUGCC	+	1369	1548	0	0	PDK_30s897541	21	180	-81.2	13.5	1	0	12.5	0	gp2a	21	787	787	0	gp2a	cucggcggagggaagacgugguuauggcgagaaggaacaggugaaacgggucCuGCCuGGCuCCCuGuAuGCCacacguauagaccaaucaauugugagauuggcuacuguggguggcgugcaaggagccaagcaugcccucucucucucucucuucuccucccucucucccuccccccc	22	pab-MIR160b,ppt-MIR160f,ppt-MIR160a,ppt-MIR160e,smo-MIR160a,smo-MIR160b,ahy-MIR160,cme-MIR160d,mes-MIR160f,mes-MIR160e,rco-MIR160c,lus-MIR160c,lus-MIR160g,tcc-MIR160a,tcc-MIR160c,ptc-MIR160f,ptc-MIR160e,ptc-MIR160g,vvi-MIR160a,vvi-MIR160b,bdi-MIR160e,osa-MIR160f,	pab-MIR160b	gttgggggcaccgcttatcTGCCTGGCTCCCTGTATGCCAtctgcgttgcttatcaagagcgggatatgcctcacagttggcatagagagagccaagcagaactgctgtttctagc	pab-miR160a	TGCCTGGCTCCCTGTATGCCA	5'	26	13.5	11.5	2	10332.5	8782.5	1550	10252.5	8782.5	1470	0	y	...((.((((((.(((...((....((.((((((((...((.((...((((..(((.(((((((.((((((((((.(..((((.((((((........))))))))).)..).)))))))))).))))))).))).))))..)).))...)).)))))))).))..)))))))))))...	2	0	0	-81.2	62	18
pda-miR164_R-4	cln-miR164_R-4	UGGAGAAGCAGGGCACG	+	7338	7452	0	0	PDK_30s740201	17	115	-58.6	11	0	3	5.5	2.5	gp2a	7	631	631	0	gp2a	cuuggugaggaggcccuuguuGGAGAAGCAGGGCACGugcaaagccuuccccuucucuaccucucuagcaaucuuugCACGuGCuCCCCuuCuCCAACaugaccuucucaccucc	101	cln-MIR164,gma-MIR164e,gma-MIR164g,gma-MIR164d,gma-MIR164a,gma-MIR164b,gma-MIR164k,gma-MIR164j,gma-MIR164f,gma-MIR164h,gma-MIR164c,gma-MIR164i,mtr-MIR164a,mtr-MIR164c,mtr-MIR164b,mtr-MIR164d,hci-MIR164a,ath-MIR164a,ath-MIR164b,ath-MIR164c,bna-MIR164d,bna-MIR164a,bna-MIR164c,bna-MIR164b,bra-MIR164a,aly-MIR164b,aly-MIR164c,aly-MIR164a,cpa-MIR164c,cpa-MIR164a,cpa-MIR164b,cme-MIR164c,cme-MIR164a,cme-…	cln-MIR164	cctggTGGAGAAGCAGGGCACGTGCGatacacagaaacaattgtataaaccattatcgcatgtgctttccttctccaccaggc	cln-miR164	TGGAGAAGCAGGGCACGTGCG	5'	39	11	11	0	7238	7238	0	7238	7238	0	0	y	...((((((((((....(((((((((((..((((((((((((((............................))))))))))))))..)))))))))))...))))))))))...	4	0	0	-58.6	35	15
pda-miR164_R-4	cln-miR164_R-4	UGGAGAAGCAGGGCACG	+	534	665	0	0	PDK_30s747091	17	132	-63.6	6.5	0	1.5	4.5	0.5	gp2a	7	631	631	0	gp2a	cuuggugaucuuuuggugaggagguccuugcuGGAGAAGCAGGGCACGugcaaagccuucgcccucucuaucucucuagcuaucuuugCACGuGCuCCCCuuCuCCAACauggccuucucaccuccaccucc	90	cln-MIR164,gma-MIR164g,gma-MIR164d,gma-MIR164a,gma-MIR164e,gma-MIR164b,gma-MIR164k,gma-MIR164i,gma-MIR164j,gma-MIR164f,gma-MIR164h,gma-MIR164c,mtr-MIR164a,mtr-MIR164c,mtr-MIR164b,hci-MIR164a,ath-MIR164b,ath-MIR164a,ath-MIR164c,bna-MIR164d,bna-MIR164c,bna-MIR164a,bna-MIR164b,bra-MIR164a,aly-MIR164c,aly-MIR164b,aly-MIR164a,cpa-MIR164c,cpa-MIR164a,cpa-MIR164b,cme-MIR164c,cme-MIR164a,cme-MIR164d,mes-…	cln-MIR164	cctggTGGAGAAGCAGGGCACGTGCGatacacagaaacaattgtataaaccattatcgcatgtgctttccttctccaccaggc	cln-miR164	TGGAGAAGCAGGGCACGTGCG	5'	31	6.5	6.5	0	4335.5	4335.5	0	4335.5	4335.5	0	0	y	...((((.......((((((((((((..((.((((((((..((((((((((((((.....((................))...))))))))))))))..)))))))).)).))))))))))))..))))...	4	0	0	-63.6	42	15
pda-miR166a_R-1	pta-miR166a_R-1	UCGGACCAGGCUUCAUUCCC	+	9	124	0	0	PDK_30s771801	20	116	-41.8	4394.5	610	555	3028.5	201	gp2a	3320	739	739	0	gp2a	cuuuugaggGGAAuGuuGuCuGGCuCGAGGucuaucucccugcagaucuuuucuuucccucccuucaugucucccagugaaagaaaucuCGGACCAGGCuuCAuuCCCcccaagcg	241	pta-MIR166b,pta-MIR166a,pde-MIR166b,pde-MIR166a,pab-MIR166a,pab-MIR166b,ppt-MIR166j,ppt-MIR166d,ppt-MIR166c,ppt-MIR166g,ppt-MIR166l,ppt-MIR166k,ppt-MIR166f,ppt-MIR166h,ppt-MIR166a,ppt-MIR166e,ppt-MIR166i,ppt-MIR166b,ppt-MIR166m,smo-MIR166b,smo-MIR166a,smo-MIR166c,gma-MIR166t,gma-MIR166b,gma-MIR166a,gma-MIR166d,gma-MIR166c,gma-MIR166r,gma-MIR166g,gma-MIR166e,gma-MIR166i,gma-MIR166p,gma-MIR166u,gma…	pta-MIR166a	ttgattgaggggaatgttgtctggctcgacttcatccggatttgggctccaatgttcggatgccgTCGGACCAGGCTTCATTCCCCccaatcgg	pta-miR166a	TCGGACCAGGCTTCATTCCCC	3'	8408	4394.5	2787	1607.5	3282142	2.08688e+06	1.19526e+06	3247930	2.08688e+06	1.16105e+06	0	y	..((((.((((((((..((((((..((((....((((......))))..((((((((.((...............)).)))))))).))))..))))))..)))))))).))))..	4	0	0	-41.8	22	16
pda-miR156i-p3	ptc-MIR156i-p3	CUCUCUAUGCUUCUGCCAUCA	-	5366	5485	0	1	PDK_30s737121	21	120	-58.2	7.5	0.5	1	5	1	gp2a	4	788	750	1	gp2a	gaaaggagccauccggugaugcuguuGACAGAAGAuAGAGAGCACagaugauggcaugcgcacuuugcaucucacuccuuugugCuCuCuAuGCuuCuGuCAuCAccuucggccccuugc	30	gma-MIR156m,gma-MIR156e,gma-MIR156l,gma-MIR156i,gma-MIR156d,mtr-MIR156g,cpa-MIR156e,cpa-MIR156f,cme-MIR156e,hbr-MIR156,mes-MIR156h,mes-MIR156j,rco-MIR156h,rco-MIR156g,lus-MIR156e,aqc-MIR156b,bcy-MIR156,mdm-MIR156ab,mdm-MIR156ac,ppe-MIR156g,ptc-MIR156h,ptc-MIR156g,ptc-MIR156l,ptc-MIR156i,sly-MIR156c,sly-MIR156b,stu-MIR156c,vvi-MIR156f,vvi-MIR156i,vvi-MIR156g,	ptc-MIR156i	tgtgatgttgTTGACAGAAGATAGAGAGCACagatgatgttttgcagtagactctggatctcactcctttgtgctctctatgcttctgccatcaccttc	ptc-MIR156i-p3	ctctctatgcttctgccatca	3'	33	7.5	0	7.5	5895.5	0	5895.5	5625.5	0	5625.5	0	y	..((((.(((....(((((......(((((((((((((((((((((((.((((..(((((.....)))))..)).)).)))))))))))))).))))))))))))))...))).))))..	1	1	1	-58.2	44	20
pda-miR169j-3p_L+1R+1_2ss19TG20CT	aly-miR169j-3p_L+1R+1_2ss19TG20CT	GGGCAGUCUCCUUGGCUAGUC	-	14305	14465	0	1	PDK_30s1124371	21	161	-80.1	0.5	0	0	0.5	0	gp2a	1	803	765	1	gp2a	gaaaggucuuacauggagauaagagucugccuuugguAGCCAAGGAuGACuuGCCuGuguccuccuuguggagguuacaugucuuugaaagcucuuuguggcuucacGGGCAGuCuCCuuGGCuAuuCugagaggcucuuauccaccaugcuaggccuaca	99	cca-MIR169a,ath-MIR169j,ath-MIR169i,ath-MIR169h,ath-MIR169k,ath-MIR169l,ath-MIR169m,ath-MIR169n,bna-MIR169i,bna-MIR169e,bna-MIR169k,bna-MIR169f,bna-MIR169c,bna-MIR169d,bna-MIR169l,bna-MIR169j,bna-MIR169g,bna-MIR169h,aly-MIR169l,aly-MIR169h,aly-MIR169i,aly-MIR169k,aly-MIR169m,aly-MIR169j,cme-MIR169e,cme-MIR169n,mes-MIR169ab,mes-MIR169q,mes-MIR169p,mes-MIR169o,mes-MIR169s,mes-MIR169w,mes-MIR169ac,m…	aly-MIR169j	gaatgaggcaaaacatattgagtaatggagtgtataatgaggaagagaggtctaacatggcgaaaagagtcatgtttaaTAGCCAAGGATGACTTGCCTGatctttttcacctccatgattcaatttgaagttcatgcgttttggattattatgcatctaaaaggtataataattcgaaaatcatgttgaatcatgcgggttaggtttcaGGCAGTCTCCTTGGCTATCttgacatgcttttttcatccatgttatacctgtttttctttctgtctctaaagtcactattaagtctcttc	aly-miR169j-3p	GGCAGTCTCCTTGGCTATC	3'	75	0.5	0	0.5	401.5	0	401.5	382.5	0	382.5	0	y	...((((((..(((((.(((((((((((..(((..(((((((((((.((((.(((((((.(((((....)))))..............(((((......)))))))))))))))))))))))))))...))))))))))))))..)))))..))))))...	1	1	2	-80.1	47	19
pda-miR169a	cca-miR169a	UAGCCAAGGAUGACUUGCCUU	-	14305	14465	0	1	PDK_30s1124371	21	161	-80.1	37	1.5	0	35	0.5	gp2a	58	783	743	1	gp2a	gaaaggucuuacauggagauaagagucugccuuugguAGCCAAGGAuGACuuGCCuGuguccuccuuguggagguuacaugucuuugaaagcucuuuguggcuucacGGGCAGuCuCCuuGGCuAuuCugagaggcucuuauccaccaugcuaggccuaca	99	cca-MIR169a,ath-MIR169j,ath-MIR169i,ath-MIR169h,ath-MIR169k,ath-MIR169l,ath-MIR169m,ath-MIR169n,bna-MIR169i,bna-MIR169e,bna-MIR169k,bna-MIR169f,bna-MIR169c,bna-MIR169d,bna-MIR169l,bna-MIR169j,bna-MIR169g,bna-MIR169h,aly-MIR169l,aly-MIR169h,aly-MIR169i,aly-MIR169k,aly-MIR169m,aly-MIR169j,cme-MIR169e,cme-MIR169n,mes-MIR169ab,mes-MIR169q,mes-MIR169p,mes-MIR169o,mes-MIR169s,mes-MIR169w,mes-MIR169ac,m…	cca-MIR169a	gtttagTAGCCAAGGATGACTTGCCTTgtttgaacacatcaagttgctggaaagtagcaccttgtttggttcgttaggcagtcactcctaggctaacttgac	cca-miR169a	TAGCCAAGGATGACTTGCCTT	5'	75	37	1	36	28898	830	28068	27489	830	26659	0	y	...((((((..(((((.(((((((((((..(((..(((((((((((.((((.(((((((.(((((....)))))..............(((((......)))))))))))))))))))))))))))...))))))))))))))..)))))..))))))...	1	1	2	-80.1	47	19
pda-miR396e-3p_R-1_3ss13CT18GA20AG	zma-miR396e-3p_R-1_3ss13CT18GA20AG	GGUCAAGAAAGCUGUGGAAG	-	46595	46739	0	1	PDK_30s756541	20	145	-56.4	0.5	0	0	0.5	0	gp2a	1	723	692	1	gp2a	gaacuucuucuucauuggucucgcucuguaauuuCCCACAGCuuuAuuGAACuGcaacucaaagcaccuagcauacaaggauggaugcaGuuCAAGAAAGCuGuGGAAGacuacaaagagggccagagagagagagagggagaga	97	pta-MIR396,pde-MIR396,pab-MIR396a,gma-MIR396i,gma-MIR396e,gma-MIR396a,gma-MIR396h,gma-MIR396c,gma-MIR396g,gma-MIR396b,gma-MIR396f,gma-MIR396d,gma-MIR396k,aau-MIR396,amg-MIR396,lja-MIR396,mtr-MIR396b,mtr-MIR396a,cca-MIR396b,cca-MIR396a,cca-MIR396c,ath-MIR396a,ath-MIR396b,bna-MIR396a,aly-MIR396a,aly-MIR396b,cpa-MIR396,cme-MIR396b,cme-MIR396c,cme-MIR396a,cme-MIR396d,hbr-MIR396b,mes-MIR396a,mes-MIR39…	zma-MIR396e	tTTCCACAGCTTTCTTGAACTTcttcttcttctctctcttagaagggccgtatagcttctttgaacctctctctctctctctctcaaaagtgtacacgaacactttcttcattctctgcctctcgctctctgatctccgaagaaGGTCAAGAAAGCCGTGGGAAGa	zma-miR396e-3p	GGTCAAGAAAGCCGTGGGAAG	3'	31	0.5	0	0.5	361.5	0	361.5	346	0	346	0	y	...(((((((((..((..(((.((((((((.(((.((((((((((.((((((((((.(.((.....(((........))).))).)))))))))).)))))))))).))).))))....)))).)))..))..)))))))))...	2	0	0	-56.4	51	19
pda-miR171h_L-1R+1	lus-miR171h_L-1R+1	UGAGCCGAACCAAUAUCACUC	-	3618	3725	0	0	PDK_30s720711	21	108	-55.7	12.5	1	3	7.5	1	gp2a	9	806	806	0	gp2a	gaagaagaagacgacauggcgugauguuggugcgguucaucucuuucugggucaaucccaaggaagcaauGAGCCGAACCAAuAuCACuCauguaagcuucauucugc	11	lus-MIR171h,ghr-MIR479,mdm-MIR171i,nta-MIR479b,stu-MIR479,vvi-MIR479,osa-MIR171h,sbi-MIR171f,sbi-MIR171e,zma-MIR171h,zma-MIR171k,	lus-MIR171h	gggccgttggagaaagtagacacgacgtggtattggttgcggctcgtcgatctcggacggctttgaccgtcgctccgATGAGCCGAACCAATATCACTcttgtatgcttctttccgttcgttttcc	lus-miR171h	ATGAGCCGAACCAATATCACT	3'	16	12.5	11	1.5	9765.5	8587	1178.5	9730.5	8587	1143.5	0	y	..((((((((...((((((.(((((((((((.((((((((..(((((((((.....))).))))))..)))))))).)))))))))))))))))...)))).))))..	2	1	1	-55.7	42	20
pda-miR166i-3p_L+2R-2	osa-miR166i-3p_L+2R-2	UCUCGGAUCAGGCUUCAUUCC	+	20647	20799	0	0	PDK_30s1018921	21	153	-65.5	5802.5	776	2102.5	2152.5	771.5	gp2a	11026	778	778	0	gp2a	gaaggaaagugaguguuuggAAuGAGGuuuGAuCCAAGAuCCuuccacagcuaguucccucucaaacagcagcgauuccucaucugggauaucagcacgucuccaaggagugauCuCGGAuCAGGCuuCAuuCCucacgccuuacuuuccagc	222	pta-MIR166b,pta-MIR166a,pde-MIR166b,pde-MIR166a,pab-MIR166b,pab-MIR166a,ppt-MIR166d,ppt-MIR166c,ppt-MIR166g,ppt-MIR166f,ppt-MIR166h,ppt-MIR166a,ppt-MIR166e,ppt-MIR166i,ppt-MIR166b,smo-MIR166b,smo-MIR166a,smo-MIR166c,gma-MIR166j,gma-MIR166k,gma-MIR166h,gma-MIR166t,gma-MIR166b,gma-MIR166a,gma-MIR166d,gma-MIR166c,gma-MIR166r,gma-MIR166g,gma-MIR166e,gma-MIR166i,gma-MIR166p,gma-MIR166u,gma-MIR166s,gma…	osa-MIR166i	agataggtgtttggAATGCAGTTTGATCCAAGATCtgcctatatatatggtgtgtatatcatatcttgtgatatgggggatatgcaacaggtgtgtgacaggggtaggtagatcTCGGATCAGGCTTCATTCCTCacaccaatac	osa-miR166i-3p	TCGGATCAGGCTTCATTCCTC	3'	11396	5802.5	5601	201.5	4497614	4.34897e+06	148640	4493403	4.34897e+06	144428	0	y	...(((((((((((((..(((((((((..((((((.(((((..(((...(((.(((........)))))).(((((((((.....)))).))).))..........)))..))))).))))))..)))))))))..))).))))))))))...	4	0	0	-65.5	36	18
pda-miR166i-5p_R+1_2ss5CA6AG	osa-miR166i-5p_R+1_2ss5CA6AG	AAUGAGGUUUGAUCCAAGAUCU	+	20647	20799	0	1	PDK_30s1018921	22	153	-65.5	2	1	0	1	0	gp2a	1	841	801	1	gp2a	gaaggaaagugaguguuuggAAuGAGGuuuGAuCCAAGAuCCuuccacagcuaguucccucucaaacagcagcgauuccucaucugggauaucagcacgucuccaaggagugauCuCGGAuCAGGCuuCAuuCCucacgccuuacuuuccagc	222	pta-MIR166b,pta-MIR166a,pde-MIR166b,pde-MIR166a,pab-MIR166b,pab-MIR166a,ppt-MIR166d,ppt-MIR166c,ppt-MIR166g,ppt-MIR166f,ppt-MIR166h,ppt-MIR166a,ppt-MIR166e,ppt-MIR166i,ppt-MIR166b,smo-MIR166b,smo-MIR166a,smo-MIR166c,gma-MIR166j,gma-MIR166k,gma-MIR166h,gma-MIR166t,gma-MIR166b,gma-MIR166a,gma-MIR166d,gma-MIR166c,gma-MIR166r,gma-MIR166g,gma-MIR166e,gma-MIR166i,gma-MIR166p,gma-MIR166u,gma-MIR166s,gma…	osa-MIR166i	agataggtgtttggAATGCAGTTTGATCCAAGATCtgcctatatatatggtgtgtatatcatatcttgtgatatgggggatatgcaacaggtgtgtgacaggggtaggtagatcTCGGATCAGGCTTCATTCCTCacaccaatac	osa-miR166i-5p	AATGCAGTTTGATCCAAGATC	5'	11396	2	1	1	1586	745	841	1546	745	801	0	y	...(((((((((((((..(((((((((..((((((.(((((..(((...(((.(((........)))))).(((((((((.....)))).))).))..........)))..))))).))))))..)))))))))..))).))))))))))...	4	0	0	-65.5	36	18
pda-miR156i-3p_L-1R+1_1ss22TG	mtr-miR156i-3p_L-1R+1_1ss22TG	GCUCACUUCUCUUUCUGUCAGCC	+	36994	37095	0	1	PDK_30s772961	23	102	-60.7	24.5	4	5	13	2.5	gp2a	23	839	802	1	gp2a	gaaggcuGACAGAAGAGAGuGAGCAcauaugguguuuucuugcauggggggagaguccaugcucgaagcuauuuguGCuCACuuCuCuGuCuGuCAGCCacc	162	ppt-MIR156b,ppt-MIR156c,ppt-MIR156a,smo-MIR156a,gma-MIR156h,gma-MIR156v,gma-MIR156a,gma-MIR156x,gma-MIR156o,gma-MIR156q,gma-MIR156s,gma-MIR156u,gma-MIR156w,gma-MIR156y,gma-MIR156k,gma-MIR156n,mtr-MIR156i,mtr-MIR156c,mtr-MIR156d,mtr-MIR156b,mtr-MIR156j,vun-MIR156a,han-MIR156b,han-MIR156a,htu-MIR156a,cca-MIR156a,cca-MIR156b,har-MIR156a,hci-MIR156a,ath-MIR156e,ath-MIR156a,ath-MIR156d,ath-MIR156f,ath…	mtr-MIR156i	gatatTGACAGAAGAGAGTGAGCACatgctgcagtgattgtatgatagcatacaattcttggtgcgTGCTCACTTCTCTTTCTGTCATCttat	mtr-miR156i-3p	TGCTCACTTCTCTTTCTGTCATC	3'	911	24.5	12.5	12	20340	10266.5	10073.5	19895	10266.5	9628.5	0	y	...((((((((((((((((((((((((.(((((...(((..(((((((.......)))))))..)))))))).))))))))).))))).))))))))))...	1	1	2	-60.7	39	19
pda-miR156a_R-1_1ss19AT	ppt-miR156a_R-1_1ss19AT	UGACAGAAGAGAGUGAGCU	+	36994	37095	0	1	PDK_30s772961	19	102	-60.7	447.5	73.5	12	353.5	8.5	gp2a	207	692	653	1	gp2a	gaaggcuGACAGAAGAGAGuGAGCAcauaugguguuuucuugcauggggggagaguccaugcucgaagcuauuuguGCuCACuuCuCuGuCuGuCAGCCacc	162	ppt-MIR156b,ppt-MIR156c,ppt-MIR156a,smo-MIR156a,gma-MIR156h,gma-MIR156v,gma-MIR156a,gma-MIR156x,gma-MIR156o,gma-MIR156q,gma-MIR156s,gma-MIR156u,gma-MIR156w,gma-MIR156y,gma-MIR156k,gma-MIR156n,mtr-MIR156i,mtr-MIR156c,mtr-MIR156d,mtr-MIR156b,mtr-MIR156j,vun-MIR156a,han-MIR156b,han-MIR156a,htu-MIR156a,cca-MIR156a,cca-MIR156b,har-MIR156a,hci-MIR156a,ath-MIR156e,ath-MIR156a,ath-MIR156d,ath-MIR156f,ath…	ppt-MIR156a	ggcggtggaggatgtgggagTGACAGAAGAGAGTGAGCACagctgagcatgtacatgaggaagtacttgcccatgtgtgctcactctcttcctgtcgcacctctcctttgacgct	ppt-miR156a	TGACAGAAGAGAGTGAGCAC	5'	911	447.5	147.5	300	300073	84130.5	215942	291254	84130.5	207123	0	y	...((((((((((((((((((((((((.(((((...(((..(((((((.......)))))))..)))))))).))))))))).))))).))))))))))...	1	1	2	-60.7	39	19
pda-miR169b_R-4	gma-miR169b_R-4	CAGCCAAGGAUGACUUG	+	37280	37481	0	0	PDK_30s910541	17	202	-103.1	304	12	0	292	0	gp2a	322	627	627	0	gp2a	gagcugcgacggagcucgucggaggccuuacgugaagaggcggagaguggaaugCAGCCAAGGAuGACuuGccggcauuaguuuuggaaggggcugccucaguucgguagguugccGGCAAGuuGuCCuuGGCuACCuucugcucucuucuucucacauaaggccuuugcaugauucaaacacugccccccgcuugcagaag	247	pde-MIR169,gma-MIR169b,gma-MIR169g,gma-MIR169v,gma-MIR169f,gma-MIR169u,gma-MIR169a,gma-MIR169m,gma-MIR169p,gma-MIR169d,gma-MIR169s,gma-MIR169c,gma-MIR169h,gma-MIR169e,mtr-MIR169a,mtr-MIR169g,mtr-MIR169b,mtr-MIR169l,mtr-MIR169f,mtr-MIR169d,mtr-MIR169e,vun-MIR169,cca-MIR169a,cca-MIR169b,ath-MIR169a,ath-MIR169b,ath-MIR169c,ath-MIR169f,ath-MIR169j,ath-MIR169h,ath-MIR169d,ath-MIR169m,ath-MIR169i,ath-M…	gma-MIR169b	tatgatgctgCAGCCAAGGATGACTTGCCGAtaaattctttctctaatttgactttcaattcatgtttgtcaattgatagtgcattagttctaatatatgcatttgattatatagaacactattgtgaaagtgtctttagggatagggtaaattcggcaagtcatctttggctacatgtctat	gma-miR169b	CAGCCAAGGATGACTTGCCGA	5'	1078	304	301	3	198938	196680	2258	198852	196680	2172	0	y	...(((((((((.(((((((..((((((((.(((.(((((..(((((..(((...(((((((((..(((((((((((.......((((..((......))..))))......)))))))))))..)))))))))...)))..)))))..)))))))).))))))))..).))))..........))...))).))))))...	4	0	0	-103.1	60	14
pda-miR399b	vun-miR399b	UGCCAAAGGAGAAUUGCCCUG	+	9234	9375	0	0	PDK_30s65509402	21	142	-65.5	4	0.5	0	3.5	0	gp2a	4	810	810	0	gp2a	gaggcacaugugaggacuaugaauaacagggugguucuccuucggcacgagagcaagccauggcgaucaucgcaugcuacugcuauucuuGCCAAAGGAGAAuuGCCCuGcuauucgccuacacacuaguucacagugcaug	26	vun-MIR399b,mes-MIR399a,lus-MIR399b,lus-MIR399d,tcc-MIR399g,mdm-MIR399c,mdm-MIR399b,mdm-MIR399a,ppe-MIR399b,csi-MIR399c,csi-MIR399e,ptc-MIR399f,ptc-MIR399g,vvi-MIR399a,vvi-MIR399h,bdi-MIR399b,osa-MIR399b,osa-MIR399a,osa-MIR399c,sbi-MIR399c,sbi-MIR399j,sbi-MIR399a,sbi-MIR399h,zma-MIR399a,zma-MIR399h,zma-MIR399c,	vun-MIR399b	taacagtgtgattctcccttggcaggtgctacatctattcttcatcagaatggcctttcTGCCAAAGGAGAATTGCCCTGccatt	vun-miR399b	TGCCAAAGGAGAATTGCCCTG	3'	8	4	3	1	3050	2264	786	3009.5	2264	745.5	0	y	...((((.(((((..((((((((((.(((((..(((((((((.((((.((((((((((....(((.....)))..)))..)))).))).)))).)))))))))..))))).)))))).........)))))))))))))...	4	0	0	-65.5	50	18
pda-miR171_R-2	pde-miR171_R-2	UGAUUGAGCCGUGCCAAUA	-	2352	2478	0	0	PDK_30s853191	19	127	-58.8	106.5	5	2	96.5	3	gp2a	73	704	704	0	gp2a	gaugcuagguaggagugugauguuggaauggcucaaucgaaucaaacugagucgaaucaauaucuacauaauuuggggaguuuuaucuGAuuGAGCCGuGCCAAuAucacacucuuugcuuagcuug	151	pde-MIR171,ppt-MIR171a,ppt-MIR171b,smo-MIR171d,smo-MIR171a,smo-MIR171b,gma-MIR171a,gma-MIR171i,gma-MIR171u,gma-MIR171c,gma-MIR171g,gma-MIR171o,gma-MIR171e,gma-MIR171j,gma-MIR171f,gma-MIR171q,gma-MIR171k,lja-MIR171a,lja-MIR171d,mtr-MIR171d,mtr-MIR171f,mtr-MIR171c,mtr-MIR171e,htu-MIR171a,hpa-MIR171a,ath-MIR171b,ath-MIR171c,ath-MIR170,bna-MIR171b,bna-MIR171c,bna-MIR171a,bna-MIR171e,bna-MIR171d,bra-M…	pde-MIR171	gaaagaatgtgatgttggctaggctcaatcggattgtaacgcccacggaatttggtcttgtgatcTGATTGAGCCGTGCCAATATCacattctaac	pde-miR171	TGATTGAGCCGTGCCAATATC	3'	211	106.5	66.5	40	74917	44426.5	30490.5	73523.5	44426.5	29097	0	y	...(((((((((((((((((((((((.(((((((((((..((.(((((...((((((.............))))))..))))).))..))))))))))).)))))))))))))))).)))))))...	2	0	0	-58.8	47	17
pda-miR396a-3p_L+1_1ss21GA	gma-miR396a-3p_L+1_1ss21GA	GUUCAAUAAAGCUGUGGGAAA	+	382	492	0	0	PDK_30s999911	21	111	-53	124	16.5	13	83	11.5	gp2a	170	774	774	0	gp2a	gauggcccucucuguauucuuCCACAGCuuuCuuGAACuGcaaccaucuccauggugaccauguuaacugcgGuuCAAuAAAGCuGuGGGAAAuuacagagagugaccaaa	105	pta-MIR396,pab-MIR396a,gma-MIR396i,gma-MIR396e,gma-MIR396a,gma-MIR396h,gma-MIR396c,gma-MIR396g,gma-MIR396b,gma-MIR396f,gma-MIR396d,gma-MIR396k,gma-MIR396j,aau-MIR396,amg-MIR396,lja-MIR396,mtr-MIR396b,mtr-MIR396a,mtr-MIR396c,cca-MIR396a,cca-MIR396c,cca-MIR396b,ath-MIR396a,ath-MIR396b,bna-MIR396a,aly-MIR396a,aly-MIR396b,cpa-MIR396,cme-MIR396b,cme-MIR396c,cme-MIR396a,cme-MIR396d,cme-MIR396e,hbr-MIR3…	gma-MIR396a	tcatggctctctttgtattcTTCCACAGCTTTCTTGAACTGcatccaaagagttcctttgcatgcatgccatggcactcttactcccaaatcttgttttgcggTTCAATAAAGCTGTGGGAAGatacagatagggtcaac	gma-miR396a-3p	TTCAATAAAGCTGTGGGAAG	3'	94185	124	118	6	93985	89037.5	4947.5	93743	89037.5	4705.5	0	y	..(((..(((((((((...((((((((((((.((((((((((........(((((...))))).....)))))))))).))))))))))))...)))))))))...)))..	2	0	0	-53	34	20
pda-miR535	pab-miR535	UGACAACGAGAGAGAGCACGC	+	16260	16414	0	0	PDK_30s790121	21	155	-88.3	5377	1148.5	252.5	3822.5	153.5	gp2a	4966	778	778	0	gp2a	gauggguuggguuuggugcuuuggccgggcaugauggguGACAACGAGAGAGAGCACGCcggucggcagucaugcagggugccauggcuggguacuggcGuGCuCuuuCuCGGuGuCAccucaguucuccccacaaagcaucuccucaauuccuu	21	pab-MIR535,ppt-MIR535c,ppt-MIR535d,ppt-MIR535a,ppt-MIR535b,cpa-MIR535,mes-MIR535b,mes-MIR535a,rco-MIR535,tcc-MIR535,aqc-MIR535,mdm-MIR535a,mdm-MIR535b,mdm-MIR535c,mdm-MIR535d,ppe-MIR535a,ppe-MIR535b,csi-MIR535,vvi-MIR535a,vvi-MIR535c,osa-MIR535,	pab-MIR535	aaatatccgttctattccattgcTGACAACGAGAGAGAGCACGCctgtattctcttatatgaattttgcatatgtgggcgtccatgcgtgctctctgcttgtagtcagcaaagcgactgcatctcaact	pab-miR535	TGACAACGAGAGAGAGCACGC	5'	5641	5377	5318.5	58.5	4151705	4.10796e+06	43748.5	4149828	4.10796e+06	41871.5	0	y	...(..(((((...(((((((((...(((.....(((((((((.(((((((((((((((((((...(((((((((.....).))))))))...))))))))))))))))))).))))))).)).....)))..)))))))))..)))))..)...	2	0	0	-88.3	55	20
pda-miR319_L+1R+1	pta-miR319_L+1R+1	UUUGGACUGAAGGGAGCUCCU	-	67722	67832	0	0	PDK_30s663101	21	111	-53.1	379	9	165	155	50	gp2a	189	777	777	0	gp2a	gcagcagaaaugggggcuccuuugagcccaaaacaaugcucggauguuucuuccuaucuacugucugaucgguuguuuuGGACuGAAGGGAGCuCCuaauucuucugcuug	135	pta-MIR319,ppt-MIR319b,ppt-MIR319a,ppt-MIR319c,ppt-MIR319e,ppt-MIR319d,smo-MIR319,gma-MIR319l,gma-MIR319g,gma-MIR319j,gma-MIR319e,gma-MIR319m,gma-MIR319k,gma-MIR319a,gma-MIR319h,gma-MIR319b,gma-MIR159a,gma-MIR159e,aau-MIR319,ahy-MIR159,amg-MIR319,mtr-MIR319c,mtr-MIR319a,mtr-MIR319d,mtr-MIR319b,mtr-MIR159a,pvu-MIR319c,pvu-MIR159a,vun-MIR319b,vun-MIR319a,htu-MIR159a,cca-MIR319,ath-MIR319c,ath-MIR31…	pta-MIR319	gataagtggagctcccttcaatccaagaaatgcgtgtttagtgacagtacatctcctgcgtcatgcacaccactatcctgtcatgcaggtcgattgattgatttgttcaggctgctggagagtcacggacagggaagtagaatgcatgaatcagcagctgaaccaccgctgcacaagctttggTTGGACTGAAGGGAGCTCCaaca	pta-miR319	TTGGACTGAAGGGAGCTCC	3'	379	379	355	24	271000	254568	16432	270305	254568	15737	0	y	((((.((((.(((((((((((((.((.(((((((((((.((((((((............)).)))))).).)))))))))).)).))))))))))))).)))).))))...	2	0	0	-53.1	42	19
pda-miR1432-5p_L-1_1ss20AG	osa-miR1432-5p_L-1_1ss20AG	UCAGGAGAGAUGACACCGGC	-	82264	82369	0	0	PDK_30s805141	20	106	-58.5	153	1	13	135	4	gp2a	132	746	746	0	gp2a	gcaggggugggggaccucuguCAGGAGAGAuGACACCGGCuucgaucggucuuccagcucgaagcgagugucaugucuccggacaagggacccucuuaacuccauu	5	mtr-MIR5225a,mtr-MIR5225b,osa-MIR1432,sbi-MIR1432,zma-MIR1432,	osa-MIR1432	cctgtgATCAGGAGAGATGACACCGACatcgccggaattcgttcttggtcttgtgccatgatgaattgatggtccgtttgatgCAGGTGTCATCTCCCCTGAACatagg	osa-miR1432-5p	ATCAGGAGAGATGACACCGAC	5'	153	153	145	8	112887	107207	5680	112599	107207	5392	0	y	...((((((((((.((..((((.(((((.(((((((..(((((((..((....))...)))))))..))))))).))))).))))..)).)))))...)))))...	4	0	0	-58.5	37	16
pda-miR171h_L-1R+1_1ss2TC	lus-miR171h_L-1R+1_1ss2TC	CGAGCCGAACCAAUAUCACUC	+	128246	128380	0	0	PDK_30s740551	21	135	-60.6	264	9	155	59	41	gp2a	446	786	786	0	gp2a	gcaguugaagaagaagaagaagaagacaugauGuGAuAuuGGAuCGGCuCAuCucuuuuugauuaagauucagaagaagaggCGAGCCGAACCAAuAuCACuCauguaugcuucauucgcaacccuuucaacgcc	13	lus-MIR171h,ghr-MIR479,mdm-MIR171i,csi-MIR479,csi-MIR171b,nta-MIR479b,stu-MIR479,vvi-MIR479,osa-MIR171h,sbi-MIR171f,sbi-MIR171e,zma-MIR171h,zma-MIR171k,	lus-MIR171h	gggccgttggagaaagtagacacgacgtggtattggttgcggctcgtcgatctcggacggctttgaccgtcgctccgATGAGCCGAACCAATATCACTcttgtatgcttctttccgttcgttttcc	lus-miR171h	ATGAGCCGAACCAATATCACT	3'	548	264	254.5	9.5	205241	198392	6849.5	205004	198392	6613	0	y	((.(((((((.....(((((((...((((((.((((((((((.(((((((..((((((((((.......)))..)))))))..))))))).))))))))))))))))...)))).))).......))))))))).	4	0	0	-60.6	49	18
pda-miR396a-3p_L+1R-1	gma-miR396a-3p_L+1R-1	GUUCAAUAAAGCUGUGGGAA	+	1092	1203	0	0	PDK_30s1195041	20	112	-50.7	65.5	4	8	45	8.5	gp2a	62	737	737	0	gp2a	gcccucucuguauucuuCCACAGCuuuCuuGAACuGcugccaucaacuauacuuccauggugggaaucuuaacugcaGuuCAAuAAAGCuGuGGGAAauuacagagagagac	105	pta-MIR396,pab-MIR396a,gma-MIR396i,gma-MIR396e,gma-MIR396a,gma-MIR396h,gma-MIR396c,gma-MIR396g,gma-MIR396b,gma-MIR396f,gma-MIR396d,gma-MIR396k,gma-MIR396j,aau-MIR396,amg-MIR396,lja-MIR396,mtr-MIR396b,mtr-MIR396a,mtr-MIR396c,cca-MIR396a,cca-MIR396c,cca-MIR396b,ath-MIR396a,ath-MIR396b,bna-MIR396a,aly-MIR396a,aly-MIR396b,cpa-MIR396,cme-MIR396b,cme-MIR396e,cme-MIR396c,cme-MIR396a,cme-MIR396d,hbr-MIR3…	gma-MIR396a	tcatggctctctttgtattcTTCCACAGCTTTCTTGAACTGcatccaaagagttcctttgcatgcatgccatggcactcttactcccaaatcttgttttgcggTTCAATAAAGCTGTGGGAAGatacagatagggtcaac	gma-miR396a-3p	TTCAATAAAGCTGTGGGAAG	3'	114657	65.5	59	6.5	46649	41576.5	5072.5	46413.5	41576.5	4837	0	y	...(((((((((...((((((((((((.(((((((((..((((((............))))))...........))))))))).))))))))))))...)))))))))....	2	0	0	-50.7	30	20
pda-miR535_L+1	pab-miR535_L+1	CUGACAACGAGAGAGAGCACGC	-	6642	6783	0	0	PDK_30s715261	22	142	-74.8	768	94.5	25.5	621.5	26.5	gp2a	402	822	822	0	gp2a	gcuggcuuggugcuuuggccggcgugguuggCuGACAACGAGAGAGAGCACGCcggucggcagucaugcaaggugccauggcuguguacuagcGuGCuCuuuCuCGuuGuCAccccaguucuccccacaaagcaucuccucg	21	pab-MIR535,ppt-MIR535c,ppt-MIR535d,ppt-MIR535a,ppt-MIR535b,cpa-MIR535,mes-MIR535b,mes-MIR535a,rco-MIR535,tcc-MIR535,aqc-MIR535,mdm-MIR535a,mdm-MIR535d,mdm-MIR535b,mdm-MIR535c,ppe-MIR535a,ppe-MIR535b,csi-MIR535,vvi-MIR535a,vvi-MIR535c,osa-MIR535,	pab-MIR535	aaatatccgttctattccattgcTGACAACGAGAGAGAGCACGCctgtattctcttatatgaattttgcatatgtgggcgtccatgcgtgctctctgcttgtagtcagcaaagcgactgcatctcaact	pab-miR535	TGACAACGAGAGAGAGCACGC	5'	992	768	430.5	337.5	583086	350145	232942	571322	350145	221178	0	y	...((...(((((((((...((..(((..((.(((((((((((((((((((((..((..((((((((((.....).)))))))))..))..)))))))))))))))))))))))))).....))...))))))))).))...	0	0	0	-74.8	51	21
pda-miR167c_R+1	gma-miR167c_R+1	UGAAGCUGCCAGCAUGAUCUGA	+	6356	6493	0	0	PDK_30s986061	22	138	-57.2	11318.5	2280	166.5	8809	63	gp2a	17340	821	821	0	gp2a	gcuucuuuuggugcaccacaaguugcuGAAGCuGCCAGCAuGAuCuGAucccuucucuauccucggcuucuugauuucccggaggaagcccaucAGAuCAuCuGGCAGuuuCAuCuacugaugggagcaugaagaaac	144	ppt-MIR167,gma-MIR167g,gma-MIR167c,gma-MIR167b,gma-MIR167e,gma-MIR167f,gma-MIR167a,gma-MIR167d,gso-MIR167a,ahy-MIR167,lja-MIR167,lja-MIR167c,lja-MIR167a,lja-MIR167b,mtr-MIR167b,mtr-MIR167a,cca-MIR167,ath-MIR167d,ath-MIR167c,ath-MIR167b,ath-MIR167a,bna-MIR167d,bna-MIR167a,bna-MIR167c,bna-MIR167b,aly-MIR167d,aly-MIR167c,aly-MIR167b,aly-MIR167a,cpa-MIR167d,cpa-MIR167c,cpa-MIR167a,cme-MIR167f,cme-MIR…	gma-MIR167c	tttgagaggtTGAAGCTGCCAGCATGATCTGgtaaatcacatacttttttttttctcacctctcatgcctaatttttaagcaccagtcattagagaaaataatggtgaaaaatccatctattcaattttttttttcaaattcaaggtttccagtatgtatcactaatggtgaaaaaagtgatggaattttgtagaacatgggttaaatttactttttttttttttgagttttcattttcttcaagtttctgagccaagaaataaaagagacttataaattggaattaatacttaaaggaaacccaccagaagggcaatttggttatcataagatgtggtttccatcaggtcatcttgcagcttcaatcactcaat	gma-miR167c	TGAAGCTGCCAGCATGATCTG	5'	20293	11318.5	11317.5	1	9150823	9149883	940	9150785	9149883	902	0	y	..((((((..((((.(((..(((...((((((((((((.((((((((((...............((((((((..........)))))))).))))))))))))))))))))))...)))..)))..))))))))))..	1	1	1	-57.2	38	21
pda-miR167a_R+2_1ss21AG	gma-miR167a_R+2_1ss21AG	UGAAGCUGCCAGCAUGAUCUGAC	-	12307	12461	0	1	PDK_30s916831	23	155	-68.6	429.5	86	1.5	341	1	gp2a	105	865	825	1	gp2a	gcuuugaugguauguggugcaccacaagcagcuGAAGCuGCCAGCAuGAuCuGAucucucuuuuucuuucuuccagaucuuggaugaagaagaugcauaucAGAuCAuGuuGCAGuuuCAuCugcugaugggagcaccagaaaacccuacaaccc	146	ppt-MIR167,gma-MIR167b,gma-MIR167c,gma-MIR167a,gma-MIR167d,gma-MIR167g,gma-MIR167e,gma-MIR167f,gso-MIR167a,ahy-MIR167,lja-MIR167c,lja-MIR167a,lja-MIR167,lja-MIR167b,mtr-MIR167b,mtr-MIR167a,cca-MIR167,ath-MIR167b,ath-MIR167d,ath-MIR167a,ath-MIR167c,bna-MIR167a,bna-MIR167c,bna-MIR167d,bna-MIR167b,aly-MIR167b,aly-MIR167d,aly-MIR167a,aly-MIR167c,cpa-MIR167c,cpa-MIR167a,cpa-MIR167d,cme-MIR167f,cme-MIR…	gma-MIR167d	aagggtcacaagggaaaaagTGAAGCTGCCAGCATGATCTAgctttggttagtgggagccagagagtgctaaccctcactaggtcatgctgtgctagcctcactccttcctatttggagac	gma-miR167a	TGAAGCTGCCAGCATGATCTA	5'	1387	429.5	41	388.5	338445	32992.5	305452	325860	32992.5	292868	0	y	...(((..(((...((((((.(((..(((((.((((((((.((((((((((((((......((((((((..(((((...))))).)))))))).....)))))))))))))))))))))).)))))..)))..))))))....)))...)))...	1	1	1	-68.6	55	22
pda-miR164a	gma-miR164a	UGGAGAAGCAGGGCACGUGCA	+	7126	7255	0	0	PDK_30s732141	21	130	-59.1	69	3.5	19.5	37.5	8.5	gp2a	136	777	777	0	gp2a	ggaagguggguugugcaggauGGAGAAGCAGGGCACGuGCAuuacuacuugacaucucuccuucaccaaguuaaagaguuagauaguucuuCAuGuGCCCAuCuuCuCCACCaugcccaccccaccuaau	75	gma-MIR164e,gma-MIR164j,gma-MIR164f,gma-MIR164h,gma-MIR164c,gma-MIR164i,gma-MIR164g,gma-MIR164d,gma-MIR164a,gma-MIR164b,gma-MIR164k,mtr-MIR164c,mtr-MIR164a,mtr-MIR164b,ath-MIR164a,ath-MIR164b,bna-MIR164a,bra-MIR164a,aly-MIR164b,aly-MIR164a,cpa-MIR164c,cpa-MIR164b,cpa-MIR164a,cme-MIR164d,cme-MIR164c,mes-MIR164a,mes-MIR164b,mes-MIR164c,rco-MIR164c,rco-MIR164a,rco-MIR164b,ssl-MIR164b,ssl-MIR164a,lus…	gma-MIR164k	aggtcctgtTGGAGAAGCAGGGCACGTGCAactcagttctagttctagctctattatagctgctctagtttatctgattttgcacgtgctccccttctccaacacgatt	gma-miR164a	TGGAGAAGCAGGGCACGTGCA	5'	182	69	68.5	0.5	53619	53219	400	53599.5	53219	380.5	0	y	...(((((((.((.(((((.((((((((..(((((((((....((((..((((.(((...(((....)))....)))))))..))))....)))))))))..)))))))))).))).)).)))))))...	4	0	0	-59.1	45	17
pda-miR164a	gma-miR164a	UGGAGAAGCAGGGCACGUGCA	+	1241	1372	0	0	PDK_30s657731	21	132	-62.4	69.5	3.5	19.5	37	9.5	gp2a	136	777	777	0	gp2a	ggaagguggguugugcaggauGGAGAAGCAGGGCACGuGCAuuacuauugaacaccucucuuucaccaaguuacagagaguuauguaguucuuCAuGuGCCCAuCuuCuCCACCaugcccaaccuaccuaau	75	gma-MIR164e,gma-MIR164j,gma-MIR164f,gma-MIR164h,gma-MIR164c,gma-MIR164i,gma-MIR164g,gma-MIR164d,gma-MIR164a,gma-MIR164b,gma-MIR164k,mtr-MIR164c,mtr-MIR164a,mtr-MIR164b,ath-MIR164a,ath-MIR164b,bna-MIR164a,bra-MIR164a,aly-MIR164b,aly-MIR164a,cpa-MIR164c,cpa-MIR164b,cpa-MIR164a,cme-MIR164d,cme-MIR164c,mes-MIR164a,mes-MIR164b,mes-MIR164c,rco-MIR164c,rco-MIR164a,rco-MIR164b,ssl-MIR164b,ssl-MIR164a,lus…	gma-MIR164k	aggtcctgtTGGAGAAGCAGGGCACGTGCAactcagttctagttctagctctattatagctgctctagtttatctgattttgcacgtgctccccttctccaacacgatt	gma-miR164a	TGGAGAAGCAGGGCACGTGCA	5'	166	69.5	69.5	0	53850	53850	0	53850	53850	0	0	y	...((((((((((.(((((.((((((((..(((((((((....(((((.......((((((.............))))))....)))))....)))))))))..)))))))))).))).))))))))))...	4	0	0	-62.4	43	17
pda-miR156a	ppt-miR156a	UGACAGAAGAGAGUGAGCAC	+	4781	4895	0	0	PDK_30s1093141	20	115	-65.7	11262.5	2705.5	367	8002.5	187.5	gp2a	20439	734	734	0	gp2a	ggaauggaggcuGACAGAAGAGAGuGAGCACauaugguguuuuucuugcauggggagggagacuccaugcucgaaacuauuuguGCuCACuuCuCuGuCuGuCAGCCaccaugca	164	ppt-MIR156b,ppt-MIR156c,ppt-MIR156a,smo-MIR156a,smo-MIR156d,gma-MIR156h,gma-MIR156v,gma-MIR156a,gma-MIR156x,gma-MIR156o,gma-MIR156q,gma-MIR156s,gma-MIR156u,gma-MIR156w,gma-MIR156y,gma-MIR156k,gma-MIR156n,mtr-MIR156i,mtr-MIR156c,mtr-MIR156d,mtr-MIR156b,mtr-MIR156j,vun-MIR156a,han-MIR156b,han-MIR156a,htu-MIR156a,cca-MIR156a,cca-MIR156b,har-MIR156a,hci-MIR156a,ath-MIR156e,ath-MIR156a,ath-MIR156d,ath…	ppt-MIR156a	ggcggtggaggatgtgggagTGACAGAAGAGAGTGAGCACagctgagcatgtacatgaggaagtacttgcccatgtgtgctcactctcttcctgtcgcacctctcctttgacgct	ppt-miR156a	TGACAGAAGAGAGTGAGCAC	5'	22569	11262.5	10901	361.5	8231499	7.96486e+06	266642	8.21859e+06	7.96486e+06	253729	0	y	...((((.((((((((((((((((((((((((.(((((....(((..((((((((.......))))))))..)))))))).))))))))).))))).)))))))))).))))...	1	1	2	-65.7	44	20
pda-miR156i-3p_L-1R+1_1ss22TG	mtr-miR156i-3p_L-1R+1_1ss22TG	GCUCACUUCUCUUUCUGUCAGCC	+	4781	4895	0	1	PDK_30s1093141	23	115	-65.7	24.5	4	5	13	2.5	gp2a	23	839	802	1	gp2a	ggaauggaggcuGACAGAAGAGAGuGAGCACauaugguguuuuucuugcauggggagggagacuccaugcucgaaacuauuuguGCuCACuuCuCuGuCuGuCAGCCaccaugca	164	ppt-MIR156b,ppt-MIR156c,ppt-MIR156a,smo-MIR156a,smo-MIR156d,gma-MIR156h,gma-MIR156v,gma-MIR156a,gma-MIR156x,gma-MIR156o,gma-MIR156q,gma-MIR156s,gma-MIR156u,gma-MIR156w,gma-MIR156y,gma-MIR156k,gma-MIR156n,mtr-MIR156i,mtr-MIR156c,mtr-MIR156d,mtr-MIR156b,mtr-MIR156j,vun-MIR156a,han-MIR156b,han-MIR156a,htu-MIR156a,cca-MIR156a,cca-MIR156b,har-MIR156a,hci-MIR156a,ath-MIR156e,ath-MIR156a,ath-MIR156d,ath…	mtr-MIR156i	gatatTGACAGAAGAGAGTGAGCACatgctgcagtgattgtatgatagcatacaattcttggtgcgTGCTCACTTCTCTTTCTGTCATCttat	mtr-miR156i-3p	TGCTCACTTCTCTTTCTGTCATC	3'	22569	24.5	12.5	12	20340	10266.5	10073.5	19895	10266.5	9628.5	0	y	...((((.((((((((((((((((((((((((.(((((....(((..((((((((.......))))))))..)))))))).))))))))).))))).)))))))))).))))...	1	1	2	-65.7	44	20
pda-miR164-p3	vun-MIR164-p3	UUGCACGUGCCCUGCUUCUCC	-	493	607	0	0	PDK_30s747091	21	115	-64.9	1	0	0	1	0	gp2a	2	810	810	0	gp2a	ggaggugagaaggccauguuggagaaggggagcacgugcaaagauagcuagagagauagagagggcgaaggcuuuGCACGuGCCCuGCuuCuCCagcaaggaccuccucaccaaa	3	vun-MIR164,cpa-MIR164e,cpa-MIR164d,	vun-MIR164	tgtTGGAGAAGGGGAGCACGTGCAagatcagacggagggagagagacgttgcacgtgccctgcttctccaac	vun-MIR164-p3	ttgcacgtgccctgcttctcc	3'	2	1	1	0	810	810	0	810	810	0	0	y	...((((((.(((((.((((((((((((((.((((((((((((...(((..............))).....))))))))))))))).))))))))))).)).))).))))))...	1	1	2	-64.9	40	20
pda-miR156a	ppt-miR156a	UGACAGAAGAGAGUGAGCAC	+	1840	1934	0	0	PDK_30s987101	20	95	-50.4	10789.5	2672.5	358.5	7574	184.5	gp2a	20439	734	734	0	gp2a	ggagguuGACAGAAGAGAGuGAGCACccauggugcuuucuugcauggcuucaugcucgaagcuauguguGCCCACuuCuCuuuCuGuCAAccgcc	170	ppt-MIR156b,ppt-MIR156c,ppt-MIR156a,smo-MIR156a,smo-MIR156d,gma-MIR156h,gma-MIR156v,gma-MIR156a,gma-MIR156x,gma-MIR156o,gma-MIR156q,gma-MIR156s,gma-MIR156u,gma-MIR156w,gma-MIR156y,gma-MIR156k,gma-MIR156n,mtr-MIR156i,mtr-MIR156c,mtr-MIR156d,mtr-MIR156b,mtr-MIR156j,vun-MIR156a,han-MIR156b,han-MIR156a,htu-MIR156a,cca-MIR156a,cca-MIR156b,har-MIR156a,hci-MIR156b,hci-MIR156a,ath-MIR156e,ath-MIR156a,ath…	ppt-MIR156a	ggcggtggaggatgtgggagTGACAGAAGAGAGTGAGCACagctgagcatgtacatgaggaagtacttgcccatgtgtgctcactctcttcctgtcgcacctctcctttgacgct	ppt-miR156a	TGACAGAAGAGAGTGAGCAC	5'	21484	10789.5	10706	83.5	7.90715e+06	7.84733e+06	59823	7905188	7.84733e+06	57860.5	0	y	((.((((((((((((((((((.((((.((((((...(((..(((((....)))))..))))))))).)))).))).)))).))))))))))).))	2	1	2	-50.4	38	19
pda-miR156i-3p_L-1R-1_2ss4TC22TA	mtr-miR156i-3p_L-1R-1_2ss4TC22TA	GCCCACUUCUCUUUCUGUCAA	+	1840	1934	0	0	PDK_30s987101	21	95	-50.4	1	0	1	0	0	gp2a	1	703	703	0	gp2a	ggagguuGACAGAAGAGAGuGAGCACccauggugcuuucuugcauggcuucaugcucgaagcuauguguGCCCACuuCuCuuuCuGuCAAccgcc	170	ppt-MIR156b,ppt-MIR156c,ppt-MIR156a,smo-MIR156a,smo-MIR156d,gma-MIR156h,gma-MIR156v,gma-MIR156a,gma-MIR156x,gma-MIR156o,gma-MIR156q,gma-MIR156s,gma-MIR156u,gma-MIR156w,gma-MIR156y,gma-MIR156k,gma-MIR156n,mtr-MIR156i,mtr-MIR156c,mtr-MIR156d,mtr-MIR156b,mtr-MIR156j,vun-MIR156a,han-MIR156b,han-MIR156a,htu-MIR156a,cca-MIR156a,cca-MIR156b,har-MIR156a,hci-MIR156b,hci-MIR156a,ath-MIR156e,ath-MIR156a,ath…	mtr-MIR156i	gatatTGACAGAAGAGAGTGAGCACatgctgcagtgattgtatgatagcatacaattcttggtgcgTGCTCACTTCTCTTTCTGTCATCttat	mtr-miR156i-3p	TGCTCACTTCTCTTTCTGTCATC	3'	21484	1	1	0	703	703	0	703	703	0	0	y	((.((((((((((((((((((.((((.((((((...(((..(((((....)))))..))))))))).)))).))).)))).))))))))))).))	2	1	2	-50.4	38	19
pda-miR396_R-1_1ss7AG	pta-miR396_R-1_1ss7AG	UUCCACGGCUUUCUUGAACU	+	34277	34426	0	0	PDK_30s1094891	20	150	-57.1	6207.5	592.5	580.5	4879	155.5	gp2a	4713	745	745	0	gp2a	ggauaugcuuuuCCACGGCuuuCuuGAACuauggacuuguuuggauuucuucuuuaccucuucuuuuauaaggaagauuucaagagaugagagacgaaaggggaagaccguuuagugcaaaguuCAAGAAAGACGuGGGAAAACAuaaca	105	pta-MIR396,pde-MIR396,pab-MIR396c,pab-MIR396b,pab-MIR396a,smo-MIR396,gma-MIR396c,gma-MIR396g,gma-MIR396b,gma-MIR396f,gma-MIR396i,gma-MIR396e,gma-MIR396d,gma-MIR396a,gma-MIR396h,gma-MIR396k,aau-MIR396,amg-MIR396,lja-MIR396,mtr-MIR396c,mtr-MIR396b,mtr-MIR396a,cca-MIR396a,cca-MIR396c,ath-MIR396b,ath-MIR396a,bna-MIR396a,aly-MIR396b,aly-MIR396a,cpa-MIR396,cme-MIR396e,cme-MIR396c,cme-MIR396b,cme-MIR396…	pta-MIR396	gaatcttgtcatacttTTCCACAGCTTTCTTGAACTTtacgtgtacgggacgaggagattctgatttctacgtctgcgattaaagttcaagaaaactgtgggaaagcatggtaggattc	pta-miR396	TTCCACAGCTTTCTTGAACTT	5'	8948	6207.5	5923.5	284	4694368	4488694	205674	4.68521e+06	4488694	196518	0	y	...((((.(((((((((.((((((((((((.((.(((....(((..(((..((((..((((((((((..((......))..))))))..))))...))))..)))..)))...))).)).)))))))))))).))))))))).))))...	2	0	0	-57.1	52	19
pda-miR396g-3p_L-1R+2_1ss11CA	ptc-miR396g-3p_L-1R+2_1ss11CA	UCAAGAAAGACGUGGGAAAACA	+	34277	34426	0	0	PDK_30s1094891	22	150	-57.1	5	2	0	3	0	gp2a	4	819	819	0	gp2a	ggauaugcuuuuCCACGGCuuuCuuGAACuauggacuuguuuggauuucuucuuuaccucuucuuuuauaaggaagauuucaagagaugagagacgaaaggggaagaccguuuagugcaaaguuCAAGAAAGACGuGGGAAAACAuaaca	105	pta-MIR396,pde-MIR396,pab-MIR396c,pab-MIR396b,pab-MIR396a,smo-MIR396,gma-MIR396c,gma-MIR396g,gma-MIR396b,gma-MIR396f,gma-MIR396i,gma-MIR396e,gma-MIR396d,gma-MIR396a,gma-MIR396h,gma-MIR396k,aau-MIR396,amg-MIR396,lja-MIR396,mtr-MIR396c,mtr-MIR396b,mtr-MIR396a,cca-MIR396a,cca-MIR396c,ath-MIR396b,ath-MIR396a,bna-MIR396a,aly-MIR396b,aly-MIR396a,cpa-MIR396,cme-MIR396e,cme-MIR396c,cme-MIR396b,cme-MIR396…	ptc-MIR396g	ttgcatgcttTTCCACGGCTTTCTTGAACTTggcactcaagagacatgagagtaaagggctaggctttcttttctattcctttcgttctttgaaattttcctgttcaaagaatccatacatatcagtctctttagtacaaagCTCAAGAAAGCCGTGGGAAAAtatga	ptc-miR396g-3p	CTCAAGAAAGCCGTGGGAAAA	3'	8948	5	5	0	4084	4084	0	4084	4084	0	0	y	...((((.(((((((((.((((((((((((.((.(((....(((..(((..((((..((((((((((..((......))..))))))..))))...))))..)))..)))...))).)).)))))))))))).))))))))).))))...	2	0	0	-57.1	52	19
pda-miR172b-5p_L-1R+2_1ss3AG	gma-miR172b-5p_L-1R+2_1ss3AG	UGGCAUCAUCAAGAUUCACAU	-	20887	20999	0	0	PDK_30s955041	21	113	-61	0.5	0	0	0.5	0	gp2a	1	810	810	0	gp2a	ggcagucgauguuugcagguguGGCAuCAuCAAGAuuCACAuugaucgagcugcugcaguccgauucuuaaugAGAAuCuuGAuGAuGCuGCAucggcaaauaggcgacuuca	124	gma-MIR172b,gma-MIR172f,gma-MIR172a,gma-MIR172h,gma-MIR172g,gma-MIR172j,gma-MIR172i,gma-MIR172d,gma-MIR172c,gma-MIR172l,gma-MIR172e,aau-MIR172,lja-MIR172b,lja-MIR172c,lja-MIR172a,mtr-MIR172c,mtr-MIR172b,mtr-MIR172d,vun-MIR172,cca-MIR172,ath-MIR172a,ath-MIR172b,ath-MIR172c,ath-MIR172d,ath-MIR172e,bna-MIR172a,bna-MIR172d,bna-MIR172b,bna-MIR172c,bra-MIR172b,bra-MIR172a,aly-MIR172b,aly-MIR172a,aly-MI…	gma-MIR172a	ttaacagtcgttatttgcggatGTAGCATCATCAAGATTCACatgcaagcgcaggtggtgggtgggacttgatgcaatctaagtgctgtgccagccaagccataggtcttttggaactgAGAATCTTGATGATGCTGCATcagccataaacgacttcac	gma-miR172b-5p	GTAGCATCATCAAGATTCAC	5'	22	0.5	0.5	0	405	405	0	405	405	0	0	y	((.(((((.(((((((.((((..(((((((((((((((.(((((((((..(((...)))..)))))...)))).)))))))))))))))..)))).)))))))..))))))).	2	0	0	-61	45	18
pda-miR172a_R-1_1ss1AG	gma-miR172a_R-1_1ss1AG	GGAAUCUUGAUGAUGCUGCA	-	20887	20999	0	1	PDK_30s955041	20	113	-61	10.5	1	0.5	8.5	0.5	gp2a	18	737	705	1	gp2a	ggcagucgauguuugcagguguGGCAuCAuCAAGAuuCACAuugaucgagcugcugcaguccgauucuuaaugAGAAuCuuGAuGAuGCuGCAucggcaaauaggcgacuuca	124	gma-MIR172b,gma-MIR172f,gma-MIR172a,gma-MIR172h,gma-MIR172g,gma-MIR172j,gma-MIR172i,gma-MIR172d,gma-MIR172c,gma-MIR172l,gma-MIR172e,aau-MIR172,lja-MIR172b,lja-MIR172c,lja-MIR172a,mtr-MIR172c,mtr-MIR172b,mtr-MIR172d,vun-MIR172,cca-MIR172,ath-MIR172a,ath-MIR172b,ath-MIR172c,ath-MIR172d,ath-MIR172e,bna-MIR172a,bna-MIR172d,bna-MIR172b,bna-MIR172c,bra-MIR172b,bra-MIR172a,aly-MIR172b,aly-MIR172a,aly-MI…	gma-MIR172j	gcaggtGCAGCAGCATCAAGATTCACAcacagattccacctccttgggggagtgtttaggtgctgAGAATCTTGATGATGCTGCATcagc	gma-miR172a	AGAATCTTGATGATGCTGCAT	3'	22	10.5	0.5	10	7812	463.5	7348.5	7514	463.5	7050.5	0	y	((.(((((.(((((((.((((..(((((((((((((((.(((((((((..(((...)))..)))))...)))).)))))))))))))))..)))).)))))))..))))))).	2	0	0	-61	45	18
pda-miR398c	gma-miR398c	UGUGUUCUCAGGUCGCCCCUG	-	439	577	0	0	PDK_30s1147101	21	139	-59.6	1559	8	2	1542	7	gp2a	1079	775	775	0	gp2a	gggggaaguuccaacaggagcgaccugcgaccacaugaguccacaugagcucggguccuucaucgcaaucucgucccucgauugcugcaaucggacggugcccguGuGuuCuCAGGuCGCCCCuGccgggccuuccacu	53	gma-MIR398c,gma-MIR398a,gma-MIR398b,gma-MIR3522,gso-MIR3522a,ahy-MIR398,mtr-MIR398c,mtr-MIR398b,mtr-MIR398a,cca-MIR398,ath-MIR398a,bol-MIR398a,aly-MIR398a,cpa-MIR398,cme-MIR398a,cme-MIR398b,rco-MIR398b,rco-MIR398a,ssl-MIR398,lus-MIR398a,lus-MIR398f,lus-MIR398b,lus-MIR398e,lus-MIR398c,lus-MIR398d,gra-MIR398,ghr-MIR398,tcc-MIR398a,tcc-MIR398b,aqc-MIR398b,aqc-MIR398a,mdm-MIR398b,mdm-MIR398c,mdm-MIR3…	gma-MIR398c	ttctacagggtcgtcctgagatcacatgaagtagaatataagcagccatatttgcttcttgtctcgtgttctcagctcaTGTGTTCTCAGGTCGCCCCTGctggactatt	gma-miR398c	TGTGTTCTCAGGTCGCCCCTG	3'	1559	1559	1474	85	1188542	1126236	62306	1185879	1126236	59643	0	y	...(((((..((..((((.((((((((.((.((((((.((........((...((....))...))....((((((...(((((...))))))))))).)).)))))).)).)))))))).))))..))..)))))...	2	0	0	-59.6	29	18
pda-miR395_R-1_1ss14AG	pab-miR395_R-1_1ss14AG	CUGAAGUGUUUGGGGGAACU	+	19686	19809	0	0	PDK_30s1026031	20	124	-63	3694.5	166	78	3429	21.5	gp2a	4966	734	734	0	gp2a	gggguuggguguccccuagaguucccuccauucacuucagcaggguagccuggcgaagccuugggaaacaguucucgacuccucgCuGAAGuGuuuGGGGGAACucugggugucgaccaacaaa	177	pab-MIR395,gma-MIR395c,gma-MIR395b,gma-MIR395a,gma-MIR395g,gma-MIR395i,gma-MIR395m,gma-MIR395k,gma-MIR395l,gma-MIR395f,gma-MIR395j,gma-MIR395d,gma-MIR395e,mtr-MIR395i,mtr-MIR395m,mtr-MIR395d,mtr-MIR395f,mtr-MIR395a,mtr-MIR395l,mtr-MIR395h,mtr-MIR395j,mtr-MIR395o,mtr-MIR395e,mtr-MIR395c,mtr-MIR395g,vun-MIR395,ath-MIR395d,ath-MIR395a,ath-MIR395e,ath-MIR395c,ath-MIR395b,ath-MIR395f,bna-MIR395b,bna-M…	pab-MIR395	ctcacagctggttctcaatgccgggagttccttcaatcacttcgccgaatccgaaagcatttcaCTGAAGTGTTTGGAGGAACTTcgggcgtcactgaactgc	pab-miR395	CTGAAGTGTTTGGAGGAACTT	3'	7082	3694.5	3687	7.5	2660082	2.65425e+06	5828.5	2.6598e+06	2.65425e+06	5545	0	y	...(((((..(...((((((((((((.(((..(((((((((..((.((...(((...)))..(((((....)))))..))))..)))))))))..)))))))))))))))...)..)))))...	4	1	1	-63	34	18
pda-miR5632_R-3	ath-miR5632_R-3	UUGGAUUUAUAGUUGGAU	-	74216	74295	0	0	PDK_30s987991	18	80	-19.8	4	0	0	4	0	gp2a	4	672	672	0	gp2a	ggguaguucaaugguuGGAuuuAuAGuuGGAuugaauuuucuguuugucauuuuaaguauagauuagccauuaacuagaa	1	ath-MIR5632,	ath-MIR5632	ttgattctcttatccaactgtaaatccgaaaccctaatattccttgtaccacattcctaatcaactaggcttgagcccgaaaaacaaaaacaaaaaaaacagtaggaatgtggttcaaggaaaattagtgtTTGGATTTATAGTTGGATAAGagaatcaa	ath-miR5632	TTGGATTTATAGTTGGATAAG	5'	4	4	4	0	2688	2688	0	2688	2688	0	0	y	...(((((.(((((((.((((((((.((..(.(((............))).)..)).))))))))))))))))))))...	4	1	1	-19.8	26	13
pda-miR156h	mes-miR156h	UUGACAGAAGAUAGAGAGCAC	-	37176	37278	0	0	PDK_30s1168861	21	103	-53.1	14391.5	1993	259	11776.5	363	gp1b	23282	778	778	0	gp1b	ggugaugcuguuGACAGAAGAuAGAGAGCACagaugaugacaugcaaggcccuuugcaucucauuccuuuguGCuCuCuAuGCuuCuGuCAuCaccuucagcc	9	mes-MIR156h,rco-MIR156h,aqc-MIR156b,aqc-MIR156a,ppe-MIR156g,ptc-MIR156j,ptc-MIR156g,ptc-MIR156h,vvi-MIR156g,	mes-MIR156h	TTGACAGAAGATAGAGAGCACagatgatgatatgcaataatggactctgcatctcactcctttgtgctctctatgcttctgtcat	mes-miR156h	TTGACAGAAGATAGAGAGCAC	5'	29285	14391.5	12963	1428.5	1.1137e+07	9999866	1.13718e+06	1.10819e+07	9999866	1.08208e+06	0	y	(((((......(((((((((((((((((((((((.(((((.(((((((....))))))).)))))..)))))))))))))).)))))))))))))).......	1	1	1	-53.1	40	20
pda-miR156h-p3	rco-MIR156h-p3	GCUCUCUAUGCUUCUGUCAUC	-	37176	37278	0	0	PDK_30s1168861	21	103	-53.1	1158	121	33	963	41	gp1b	970	781	781	0	gp1b	ggugaugcuguuGACAGAAGAuAGAGAGCACagaugaugacaugcaaggcccuuugcaucucauuccuuuguGCuCuCuAuGCuuCuGuCAuCaccuucagcc	9	mes-MIR156h,rco-MIR156h,aqc-MIR156b,aqc-MIR156a,ppe-MIR156g,ptc-MIR156j,ptc-MIR156g,ptc-MIR156h,vvi-MIR156g,	rco-MIR156h	tgttgTTGACAGAAGATAGAGAGCACagatgatgatgtgcaatgactttttctgcatctcactcctttgtgctctctatgcttctgtcatcaccttc	rco-MIR156h-p3	gctctctatgcttctgtcatc	3'	29285	1158	1142	16	903805	892072	11733	903437	892072	11365	0	y	(((((......(((((((((((((((((((((((.(((((.(((((((....))))))).)))))..)))))))))))))).)))))))))))))).......	1	1	1	-53.1	40	20
pda-miR171m_R-1	gma-miR171m_R-1	UUGAGCCGCGUCAAUAUCUC	-	24971	25107	0	0	PDK_30s857171	20	137	-64.6	26.5	1.5	2	20	3	gp2a	15	692	692	0	gp2a	ggugauuggaguguucgacugaguuggAGGuAuuGGCGCGCCuCAAuCugaaaacaugguuacauacucgaauagccauguaauuggauuGAGCCGCGuCAAuAuCuCcuucacacgaaacacucacaucgaucuaa	21	gma-MIR171m,gma-MIR171t,gma-MIR171p,gma-MIR171n,lja-MIR171b,mtr-MIR171b,cme-MIR171h,mes-MIR171a,lus-MIR171g,lus-MIR171d,lus-MIR171j,mdm-MIR171b,mdm-MIR171a,ppe-MIR171h,ctr-MIR171,stu-MIR171b,vvi-MIR171b,osa-MIR171i,sbi-MIR171h,zma-MIR171m,zma-MIR171l,	gma-MIR171t	gaagtgctgtatgaagcacaaatcaaggtattggcgcgcctcaatttgaagtcatggttaacatgaaacaagccatgtagttttaaTTGAGCCGCGTCAATATCTCAtcttgcactt	gma-miR171m	TTGAGCCGCGTCAATATCTCA	3'	61	26.5	16	10.5	18601	11147	7454	18276	11147	7129	0	y	((((((..(((((((((..((((..(((((((((((((((.(((((((..(..(((((((((..........)))))))))..)..))))))).)))))))))))))))))))..)))).)))))..))).)))...	2	0	0	-64.6	51	20
pda-miR398a_R+1_1ss15AG	gma-miR398a_R+1_1ss15AG	UGUGUUCUCAGGUCGCCCCUUU	+	954	1050	0	1	PDK_30s874111	22	97	-48.9	16	0	0	15	1	gp2a	4	821	781	1	gp2a	guagaucccaaaggagugcaaucugagaacacagcagcgagugccaagaccuguuugccacugcaucuGuGuuCuCAGGuCACCCCuuugggucacc	31	gma-MIR398a,gma-MIR398b,ahy-MIR398,mtr-MIR398a,ath-MIR398a,ath-MIR398c,ath-MIR398b,bol-MIR398a,aly-MIR398a,aly-MIR398b,cme-MIR398b,hbr-MIR398,rco-MIR398a,ssl-MIR398,lus-MIR398b,lus-MIR398e,lus-MIR398c,lus-MIR398d,gra-MIR398,ghr-MIR398,tcc-MIR398b,aqc-MIR398a,mdm-MIR398a,csi-MIR398,ptc-MIR398a,nta-MIR398,stu-MIR398b,vvi-MIR398a,bdi-MIR398b,bdi-MIR398a,osa-MIR398a,	gma-MIR398b	agtccaaatggtttatctcagaggagtggatctgagaacacaaggctggtttgcactgctatattatgatcgattggtataaggtgaatttacttTGTGTTCTCAGGTCACCCCTTtgagccaacctgttgacat	gma-miR398a	TGTGTTCTCAGGTCACCCCTT	3'	16	16	12	4	12161	8877	3284	12001	8877	3124	0	y	...((.((((((((.(((..((((((((((((((..((.((((.((((.....)))).))))))..))))))))))))))))).))))))))))...	2	2	1	-48.9	37	21
pda-miR167a	gma-miR167a	UGAAGCUGCCAGCAUGAUCUA	-	153792	153941	0	0	PDK_30s943301	21	150	-65.9	61	6	5.5	48.5	1	gp2a	36	778	778	0	gp2a	guagugcccaggggaaugaguGAAGCuGCCAGCAuGAuCuAgcuuugauugacuaaaacgacuuauguaugugugguaguuuuaagucagccaaucuuugcuaGGuCAuGCuGuGACAGCCuCACuucuucccauaugaaugggcauaua	140	ppt-MIR167,gma-MIR167b,gma-MIR167a,gma-MIR167d,gma-MIR167c,gma-MIR167e,gma-MIR167f,gma-MIR167g,gso-MIR167a,ahy-MIR167,lja-MIR167c,lja-MIR167a,lja-MIR167b,lja-MIR167,mtr-MIR167a,mtr-MIR167b,cca-MIR167,ath-MIR167b,ath-MIR167a,ath-MIR167d,bna-MIR167a,bna-MIR167c,bna-MIR167b,bna-MIR167d,aly-MIR167b,aly-MIR167a,aly-MIR167d,cpa-MIR167a,cpa-MIR167c,cpa-MIR167d,cme-MIR167b,cme-MIR167a,cme-MIR167f,cme-MIR…	gma-MIR167d	aagggtcacaagggaaaaagTGAAGCTGCCAGCATGATCTAgctttggttagtgggagccagagagtgctaaccctcactaggtcatgctgtgctagcctcactccttcctatttggagac	gma-miR167a	TGAAGCTGCCAGCATGATCTA	5'	83	61	18	43	43997	14004	29993	42998.5	14004	28994.5	0	y	...(((((((.(((((..(((((.((((.((((((((((((((...(((((((((((((.(((...........))).))))).)))))....)))...))))))))))))))...)))).)))))..))))).......)))))))...	4	2	1	-65.9	51	19
pda-miR167b-3p	aly-miR167b-3p	GGUCAUGCUCUGACAGCCUCACU	-	153792	153941	0	1	PDK_30s943301	23	150	-65.9	1	0	0.5	0.5	0	gp2a	1	888	849	1	gp2a	guagugcccaggggaaugaguGAAGCuGCCAGCAuGAuCuAgcuuugauugacuaaaacgacuuauguaugugugguaguuuuaagucagccaaucuuugcuaGGuCAuGCuGuGACAGCCuCACuucuucccauaugaaugggcauaua	140	ppt-MIR167,gma-MIR167b,gma-MIR167a,gma-MIR167d,gma-MIR167c,gma-MIR167e,gma-MIR167f,gma-MIR167g,gso-MIR167a,ahy-MIR167,lja-MIR167c,lja-MIR167a,lja-MIR167b,lja-MIR167,mtr-MIR167a,mtr-MIR167b,cca-MIR167,ath-MIR167b,ath-MIR167a,ath-MIR167d,bna-MIR167a,bna-MIR167c,bna-MIR167b,bna-MIR167d,aly-MIR167b,aly-MIR167a,aly-MIR167d,cpa-MIR167a,cpa-MIR167c,cpa-MIR167d,cme-MIR167b,cme-MIR167a,cme-MIR167f,cme-MIR…	aly-MIR167b	atctgcacaacttgttgctcaggtattttgaagacaagtccacaagggaacaagTGAAGCTGCCAGCATGATCTAtctttggttaagagatgaatgtgtaaacatattgcttaaacccaagctaGGTCATGCTCTGACAGCCTCACTccttcctggtttaggaccattcactgataaagcattccacatgccgat	aly-miR167b-3p	GGTCATGCTCTGACAGCCTCACT	3'	83	1	0	1	819.5	0	819.5	782.5	0	782.5	0	y	...(((((((.(((((..(((((.((((.((((((((((((((...(((((((((((((.(((...........))).))))).)))))....)))...))))))))))))))...)))).)))))..))))).......)))))))...	4	2	1	-65.9	51	19
pda-miR156i-3p_L-1_1ss22TG	mtr-miR156i-3p_L-1_1ss22TG	GCUCACUUCUCUUUCUGUCAGC	+	403	502	0	0	PDK_30s882441	22	100	-57	622.5	67	16	522	17.5	gp2a	544	819	819	0	gp2a	gucgggggCuGACAGAAGAGAGuGAGCacacagcgcggcaauugcaucggggaaugccguucccguugcguGCuCACuuCuCuuuCuGuCAGCuucuuuc	164	ppt-MIR156b,ppt-MIR156c,ppt-MIR156a,smo-MIR156a,gma-MIR156h,gma-MIR156k,gma-MIR156v,gma-MIR156x,gma-MIR156o,gma-MIR156q,gma-MIR156s,gma-MIR156w,gma-MIR156y,gma-MIR156n,gma-MIR156a,gma-MIR156u,mtr-MIR156i,mtr-MIR156c,mtr-MIR156d,mtr-MIR156b,mtr-MIR156j,vun-MIR156a,han-MIR156a,han-MIR156b,htu-MIR156a,cca-MIR156a,cca-MIR156b,har-MIR156a,hci-MIR156a,ath-MIR156e,ath-MIR156d,ath-MIR156f,ath-MIR156a,ath…	mtr-MIR156i	gatatTGACAGAAGAGAGTGAGCACatgctgcagtgattgtatgatagcatacaattcttggtgcgTGCTCACTTCTCTTTCTGTCATCttat	mtr-miR156i-3p	TGCTCACTTCTCTTTCTGTCATC	3'	1947	622.5	576	46.5	513480	476300	37180	511936	476300	35636	0	y	...((..((((((((((((((((((((((.(((((.((.((..((((......))))..))))))))).)))))))).)))).))))))))))..))...	1	1	2	-57	37	19
pda-miR156a_L+1R-2	ppt-miR156a_L+1R-2	CUGACAGAAGAGAGUGAGC	+	403	502	0	0	PDK_30s882441	19	100	-57	370	51.5	10	303.5	5	gp2a	285	693	693	0	gp2a	gucgggggCuGACAGAAGAGAGuGAGCacacagcgcggcaauugcaucggggaaugccguucccguugcguGCuCACuuCuCuuuCuGuCAGCuucuuuc	164	ppt-MIR156b,ppt-MIR156c,ppt-MIR156a,smo-MIR156a,gma-MIR156h,gma-MIR156k,gma-MIR156v,gma-MIR156x,gma-MIR156o,gma-MIR156q,gma-MIR156s,gma-MIR156w,gma-MIR156y,gma-MIR156n,gma-MIR156a,gma-MIR156u,mtr-MIR156i,mtr-MIR156c,mtr-MIR156d,mtr-MIR156b,mtr-MIR156j,vun-MIR156a,han-MIR156a,han-MIR156b,htu-MIR156a,cca-MIR156a,cca-MIR156b,har-MIR156a,hci-MIR156a,ath-MIR156e,ath-MIR156d,ath-MIR156f,ath-MIR156a,ath…	ppt-MIR156a	ggcggtggaggatgtgggagTGACAGAAGAGAGTGAGCACagctgagcatgtacatgaggaagtacttgcccatgtgtgctcactctcttcctgtcgcacctctcctttgacgct	ppt-miR156a	TGACAGAAGAGAGTGAGCAC	5'	1947	370	153	217	270918	106082	164837	264694	106082	158612	0	y	...((..((((((((((((((((((((((.(((((.((.((..((((......))))..))))))))).)))))))).)))).))))))))))..))...	1	1	2	-57	37	19
pda-miR393d_R-6_1ss11CT	mdm-miR393d_R-6_1ss11CT	AUCAUGCGAUUCCUU	+	36345	36456	0	0	PDK_30s884951	15	112	-50.3	28	2	0	26	0	gp2a	22	551	551	0	gp2a	gugagcagcugauggagaacuCCAAAGGGAuCGCAuuGAuCucucucucucucucucucgauaguguuguuagAuCAuGCGAuuCCuuuggaauuuuccgccuguugcuucu	57	gma-MIR393j,gma-MIR393i,gma-MIR393h,gma-MIR393k,gma-MIR393g,gma-MIR393c,gma-MIR393e,gma-MIR393a,gma-MIR393d,gma-MIR393f,mtr-MIR393a,mtr-MIR393b,htu-MIR393a,htu-MIR393c,htu-MIR393b,cca-MIR393,ath-MIR393b,ath-MIR393a,bna-MIR393,aly-MIR393b,aly-MIR393a,cpa-MIR393,cme-MIR393b,cme-MIR393c,cme-MIR393a,mes-MIR393d,mes-MIR393c,mes-MIR393b,mes-MIR393a,rco-MIR393,lus-MIR393b,lus-MIR393d,lus-MIR393a,lus-MIR…	mdm-MIR393a	gtggaggctTCCAAAGGGATCGCATTGATCTaattgatcatatatgtcaaacatcgtccgtacagacatggcaggttatatatgtagttggATCATGCGATCCCTTCGGACGtttccat	mdm-miR393d	ATCATGCGATCCCTTCGGACG	3'	2838	28	28	0	15362	15362	0	15362	15362	0	0	y	..(((((((...(((((((.((((((((((((((((.(((((......((.((......)).)).......))))))))))))))))))))).)))))))...)))))))..	1	1	1	-50.3	35	21
pda-miR393a_R+1_1ss21CT	gma-miR393a_R+1_1ss21CT	UCCAAAGGGAUCGCAUUGAUUU	+	36345	36456	0	1	PDK_30s884951	22	112	-50.3	2200	301.5	6	1871	21.5	gp2a	865	817	778	1	gp2a	gugagcagcugauggagaacuCCAAAGGGAuCGCAuuGAuCucucucucucucucucucgauaguguuguuagAuCAuGCGAuuCCuuuggaauuuuccgccuguugcuucu	57	gma-MIR393j,gma-MIR393i,gma-MIR393h,gma-MIR393k,gma-MIR393g,gma-MIR393c,gma-MIR393e,gma-MIR393a,gma-MIR393d,gma-MIR393f,mtr-MIR393a,mtr-MIR393b,htu-MIR393a,htu-MIR393c,htu-MIR393b,cca-MIR393,ath-MIR393b,ath-MIR393a,bna-MIR393,aly-MIR393b,aly-MIR393a,cpa-MIR393,cme-MIR393b,cme-MIR393c,cme-MIR393a,mes-MIR393d,mes-MIR393c,mes-MIR393b,mes-MIR393a,rco-MIR393,lus-MIR393b,lus-MIR393d,lus-MIR393a,lus-MIR…	gma-MIR393f	ggaggaggcaTCCAAAGGGATCGCATTGATCccaaatccaagctttaatatttttctctcttctcactcaataatattaatttaTTTGGGATCATGCTATCCCTTtggatttctcctt	gma-miR393a	TCCAAAGGGATCGCATTGATC	5'	2838	2200	1033	1167	1686613	730124	956490	1.64113e+06	730124	911007	0	y	..(((((((...(((((((.((((((((((((((((.(((((......((.((......)).)).......))))))))))))))))))))).)))))))...)))))))..	1	1	1	-50.3	35	21
pda-miR160b_L+2R-2	cca-miR160b_L+2R-2	UAUGCCUGGCUCCCUGUAUGC	+	8411	8588	0	0	PDK_30s65509285	21	178	-78.7	3	0	1	1	1	gp2a	2	808	808	0	gp2a	guggagugaagaagagauuauugugagaaggaacaggugaaauggguuAuGCCuGGCuCCCuGuAuGCcacacguauagaccaaucuauugugagauuggcuacuuuggguggcgugcaaggagccaagcaugcccuuccucucucucccucccuccauauuccuuucuucacuugua	31	cca-MIR160b,ath-MIR160a,ath-MIR160c,bna-MIR160a,bra-MIR160a,aly-MIR160c,aly-MIR160a,cme-MIR160b,mes-MIR160c,mes-MIR160d,rco-MIR160b,lus-MIR160h,lus-MIR160j,lus-MIR160i,tcc-MIR160b,mdm-MIR160b,mdm-MIR160a,ppe-MIR160a,ptc-MIR160d,ptc-MIR160a,sly-MIR160a,nta-MIR160b,nta-MIR160a,vvi-MIR160e,bdi-MIR160a,osa-MIR160e,osa-MIR160d,tae-MIR160,zma-MIR160f,zma-MIR160e,zma-MIR160d,	cca-MIR160b	agcataTGCCTGGCTCCCTGTATGCCAtttgcaaagcgtatcgacatatcgatggtctatgtggatggcgtatgcggagccaagcatgttccg	cca-miR160b	TGCCTGGCTCCCTGTATGCCA	5'	3	3	3	0	3039	3039	0	3039	3039	0	0	y	...((((((((((..((.((.((.(((.(((...(((.((...(((.(((((.(((((((.((((((((((.((..(((.(((((((......))))))))))...)).)))))))))).))))))).))))))))....)))))...)))..))))))).))..))))))))))...	2	0	0	-78.7	64	19
pda-miR395a-5p_R-3_1ss10AG	ppe-miR395a-5p_R-3_1ss10AG	GUUCCCUCAGACACUUC	+	208323	208515	0	0	PDK_30s6550926	17	193	-80.6	5	0	0	5	0	gp2a	2	611	611	0	gp2a	GuuCCCuCAGACACuuCacuagggcuugcccacuguuggggagccaaucucugCuGAAGuGuuuGGGGGAACuccgggugucgcucaacaaauuuugagccucuuucaagaaccauuuuaaugggccaagucgcuggacgaggagugcaaucagccaaguugguuguccccuggaguucccucagacacuuca	180	pab-MIR395,gma-MIR395c,gma-MIR395b,gma-MIR395a,gma-MIR395g,gma-MIR395i,gma-MIR395m,gma-MIR395k,gma-MIR395l,gma-MIR395f,gma-MIR395j,gma-MIR395d,gma-MIR395e,mtr-MIR395i,mtr-MIR395m,mtr-MIR395d,mtr-MIR395f,mtr-MIR395a,mtr-MIR395l,mtr-MIR395h,mtr-MIR395j,mtr-MIR395o,mtr-MIR395e,mtr-MIR395c,mtr-MIR395g,vun-MIR395,cca-MIR395a,ath-MIR395d,ath-MIR395a,ath-MIR395e,ath-MIR395c,ath-MIR395b,ath-MIR395f,bna-M…	ppe-MIR395o	ctagaGTTCCCTCAAACACTTCATTggagattatatgcccctctctactttctatctactgaagtgtttttggggacccttag	ppe-miR395a-5p	GTTCCCTCAAACACTTCATT	3'	8750	5	5	0	2882	2882	0	2882	2882	0	0	n	(((((((..((....))....(((....)))......)))))))..........((((((((((((((((((((((((....((((((......))))))((((((......((((....)))).(((......)))..)))))).(((((((((...)))))))))..))))))))))))))))))))))))	0	0	0	-80.6	7	11
pda-miR395_R-1_1ss14AG	pab-miR395_R-1_1ss14AG	CUGAAGUGUUUGGGGGAACU	+	208323	208515	0	0	PDK_30s6550926	20	193	-80.6	5317	347.5	117	4821.5	31	gp2a	4966	734	734	0	gp2a	GuuCCCuCAGACACuuCacuagggcuugcccacuguuggggagccaaucucugCuGAAGuGuuuGGGGGAACuccgggugucgcucaacaaauuuugagccucuuucaagaaccauuuuaaugggccaagucgcuggacgaggagugcaaucagccaaguugguuguccccuggaguucccucagacacuuca	180	pab-MIR395,gma-MIR395c,gma-MIR395b,gma-MIR395a,gma-MIR395g,gma-MIR395i,gma-MIR395m,gma-MIR395k,gma-MIR395l,gma-MIR395f,gma-MIR395j,gma-MIR395d,gma-MIR395e,mtr-MIR395i,mtr-MIR395m,mtr-MIR395d,mtr-MIR395f,mtr-MIR395a,mtr-MIR395l,mtr-MIR395h,mtr-MIR395j,mtr-MIR395o,mtr-MIR395e,mtr-MIR395c,mtr-MIR395g,vun-MIR395,cca-MIR395a,ath-MIR395d,ath-MIR395a,ath-MIR395e,ath-MIR395c,ath-MIR395b,ath-MIR395f,bna-M…	pab-MIR395	ctcacagctggttctcaatgccgggagttccttcaatcacttcgccgaatccgaaagcatttcaCTGAAGTGTTTGGAGGAACTTcgggcgtcactgaactgc	pab-miR395	CTGAAGTGTTTGGAGGAACTT	5'	8750	5317	5277	40	3884293	3850749	33544	3882837	3850749	32088	0	n	(((((((..((....))....(((....)))......)))))))..........((((((((((((((((((((((((....((((((......))))))((((((......((((....)))).(((......)))..)))))).(((((((((...)))))))))..))))))))))))))))))))))))	0	0	0	-80.6	7	11
pda-miR528-5p_R-1_1ss9GA	bdi-miR528-5p_R-1_1ss9GA	UGGAAGGGACAUGCAGAGGA	-	15402	15570	0	0	PDK_30s799661	20	169	-75.4	50	1	17	30.5	1.5	gp2a	34	755	755	0	gp2a	nagagagagagagauugggauguagcaguagcaguGGAAGGGACAuGCAGAGGAaaggccaagaaagagaggaggcaaaaaugguucucaucucaaugcuucuucucaaggcagauuCCuGuGCAuGCCuCCuCCAccccugcugcuaccauuccccuccccuucugaa	6	bdi-MIR528,ssp-MIR528,osa-MIR528,sbi-MIR528,zma-MIR528b,zma-MIR528a,	bdi-MIR528	tttggggttgggattgggggctggagcagcagcggTGGAAGGGGCATGCAGAGGAGcagggatgatggggggttgtactctgcttcttcccctctcgttctCCTGTGCCTGCCTCTTCCATTcctgctgctaccgccgtgctcggtgggcagggctgggc	bdi-miR528-5p	TGGAAGGGGCATGCAGAGGAG	5'	110	50	30.5	19.5	35387.5	21165.5	14222	34688	21165.5	13522.5	0	y	...((((...(((...(((((((((((((((..(((((.(((.((((((.(((((..(((......(((((((((((.....(((....)))....)))))))))))..)))...))))).)))))).))).)))))..)))))))))).))))).)))...))))...	2	0	0	-75.4	58	17
pda-miR479_L-1R-2_1ss12TC	ghr-miR479_L-1R-2_1ss12TC	GUGAUAUUGGCUCGGCUCA	-	13425	13516	0	1	PDK_30s947091	19	92	-34.8	4	0	3	0	1	gp2a	3	690	651	1	gp2a	nnnaaGuGAuAuuGGCGCGGCuCAaucugagauuaguuuacgaucauacguaaaguccaucaucggauugaaccucaccaauaucgcuucuu	9	mes-MIR171d,ghr-MIR479,ppe-MIR171e,csi-MIR171b,csi-MIR479,stu-MIR479,	ghr-MIR479	ggaggagtagacacgaCGTGATATTGGTTCGGCTCATCttattgtgattaaaaatttcaaggcgagccgaatcaatatcactcatgtatgctttttt	ghr-miR479	CGTGATATTGGTTCGGCTCATC	5'	4	4	0	4	2634	0	2634	2480	0	2480	0	y	...((((((((((((...((.((((((((((((...((((((......))))))....))).))))))))).))...))))))))))))...	6	0	0	-34.8	32	15
pda-miR159c_R-1_1ss7TG	pta-miR159c_R-1_1ss7TG	CUUGGAGUGAAGGGAGCUCC	+	71865	71993	0	1	PDK_30s887531	20	129	-52.1	7	1	0	6	0	gp2a	5	725	684	1	gp2a	nnnccugCuuGGAGuGAAGGGAGCCCCgucaacuacucuucguugcauaaaucucucucuaucucuccucucuccccccucuaugugcgagagaggauuaccggggcucacuucuccccaggugggaaa	77	pta-MIR159c,pta-MIR159a,ppt-MIR319a,ppt-MIR319c,ppt-MIR319e,ppt-MIR319b,ppt-MIR319d,smo-MIR159,smo-MIR319,gma-MIR156aa,gma-MIR159b,gma-MIR156z,gma-MIR159f,gma-MIR159c,gma-MIR319j,gma-MIR319g,gma-MIR319e,gma-MIR319m,gma-MIR319k,gma-MIR319a,gma-MIR319h,gma-MIR319b,aau-MIR319,amg-MIR319,mtr-MIR159b,mtr-MIR319a,mtr-MIR319d,mtr-MIR319b,pvu-MIR319c,vun-MIR319a,vun-MIR319b,ath-MIR319b,aly-MIR319b,cpa-MI…	pta-MIR159c	gatgtgtgaatgatgcgggagctgattttgtccaggaaatgtcttttcCTTGGATTGAAGGGAGCTCCCttatgtagcatacatt	pta-miR159c	CTTGGATTGAAGGGAGCTCCC	5'	7	7	0	7	4933	0	4933	4656	0	4656	0	y	...((..(((((...((((.((((((((.((((........))))....................(((((((((..............)))))))))....)))))))).))))...)))))..))...	6	0	0	-52.1	19	16
pda-miR399a	gma-miR399a	UGCCAAAGGAGAGUUGCCCUG	-	7632	7729	0	1	PDK_30s831151	21	98	-53.2	23	2.5	1	17.5	2	gp2a	19	783	745	1	gp2a	uaacagggugguucuccuuuggcacgaguacgacuguacgaggcauggcgaagauugccugcugcugcuauucuuGCCAAAGGAGAAuuGCCCuGcca	51	gma-MIR399b,gma-MIR399c,gma-MIR399h,gma-MIR399a,mtr-MIR399l,pvu-MIR399a,vun-MIR399b,vun-MIR399a,ath-MIR399c,ath-MIR399b,aly-MIR399c,aly-MIR399b,mes-MIR399a,mes-MIR399f,rco-MIR399a,lus-MIR399b,lus-MIR399d,tcc-MIR399g,tcc-MIR399i,mdm-MIR399c,mdm-MIR399b,mdm-MIR399a,mdm-MIR399j,mdm-MIR399i,ppe-MIR399b,csi-MIR399c,csi-MIR399e,csi-MIR399d,ptc-MIR399f,ptc-MIR399g,vvi-MIR399a,vvi-MIR399h,vvi-MIR399c,vvi…	gma-MIR399a	aaaacagctatagggcttctctttattggcaggaaattatcatgaccacttcatcagatatctTGCCAAAGGAGAGTTGCCCTGttgctacttt	gma-miR399a	TGCCAAAGGAGAGTTGCCCTG	3'	27	23	3	20	17927	2264	15663	17164.5	2264	14900.5	0	y	...(((((..((((((((((((((.(((((.....(((...((((.(((((...)))))))))..)))))))).))))))))))))))..)))))...	4	0	0	-53.2	36	19
pda-miR5523_L+8R+3	osa-miR5523_L+8R+3	UGUUGACAUGAGGAGGAACAUAUUUACUAGUUA	-	67729	67808	0	0	PDK_30s706191	33	80	-21	22	8	3	8	3	gp1b	3	1254	1254	0	gp1b	uacuaaaaaacaaguaagugugauccccccuaaacaauaaaauauGuuGACAuGAGGAGGAACAuAuuuACuAGuuAuau	1	osa-MIR5523,	osa-MIR5523	tactagaaaacaagtaagtgtaattccccctaaacattaaaatatgttgacaTGAGGAGGAACATATTTACTAGttatattgtc	osa-miR5523	TGAGGAGGAACATATTTACTAG	3'	22	22	18	4	21355	19056	2299	21202	19056	2146	0	n	........(((.((((((((((.(((..(((...(((((.....))))).....))).))).)))))))))).)))....	8	2	2	-21	24	24
pda-miR396e_L-1_1ss7-A	cme-miR396e_L-1_1ss7-A	UCCACAGGCUUUCUUGAACUG	+	40910	41010	0	0	PDK_30s1094891	21	101	-56.2	35806	3111	2390	29532	773	gp2a	19068	784	784	0	gp2a	uaugucuuCCACAGGCuuuCuuGAACuGugaacuuguuuggauuucucaaaagagaaccaaauuaaggguugauaguucaagaaaguccguggaagacaug	17	mtr-MIR396c,cme-MIR396e,mdm-MIR396g,mdm-MIR396f,ptc-MIR396f,bdi-MIR396b,bdi-MIR396a,osa-MIR396e,osa-MIR396f,osa-MIR396g,osa-MIR396d,osa-MIR396h,sbi-MIR396e,sbi-MIR396d,zma-MIR396c,zma-MIR396d,far-MIR396,	cme-MIR396e	ctttgtattcTTCCACGGCTTTCTTGAACTGcatttcattatctgatctttctcttcttccaattatatctttttacaatacatacatatatatatatatatatatatatacgtattcctcttgctatgaatttcaatggctgcagttcaataaagctgtgggaagatacaata	cme-miR396e	TTCCACGGCTTTCTTGAACTG	5'	38305	35806	32734.5	3071.5	26627875	24447214	2180661	26533659	24447214	2086445	0	y	((((((((((((.((((((((((((((((.((((.((((((..(((((....)))))))))))....)))).)))))))))))))))).))))))))))))	2	0	0	-56.2	43	20
pda-miR477d_L+1	mes-miR477d_L+1	ACUCUCCCUCAAGGGCUUCUC	+	18548	18652	0	0	PDK_30s712481	21	105	-56.6	16	3	2	8	3	gp2a	10	792	792	0	gp2a	ucagaggcaucuagcacucACuCuCCCuCAAGGGCuuCuCcccucacaugcuuguuaguguaggucagaagcccuuaggguagagugaaggagagaugucucagg	14	gma-MIR5036,mes-MIR477d,mes-MIR477b,mes-MIR477a,mes-MIR477c,mes-MIR477e,mes-MIR477i,mes-MIR477h,aqc-MIR477e,aqc-MIR477b,mdm-MIR477b,csi-MIR477b,csi-MIR473,nta-MIR477a,	mes-MIR477d	caaggcattggttgctcaCTCTCCCTCAAGGGCTTCTCcaatgtgccctagcatgcatgcatccaaacattaaaagaagaacgaaagagaaaaaacattttcgactagctggggtatggatgcgagaagctcttgcagggggagtgaacaagcagtgacttg	mes-miR477d	CTCTCCCTCAAGGGCTTCTC	5'	16	16	15	1	12044	11276	768	12003	11276	727	0	y	...(((((((((.....(((((((((((.((((((((((..(((.((((........)))))))..)))))))))))))).))))))).....)))))))))...	1	1	2	-56.6	37	19
pda-miR396	pta-miR396	UUCCACAGCUUUCUUGAACUU	-	113	198	0	0	PDK_30s1131321	21	86	-39.7	10097	581	282.5	9042	191.5	gp2a	5364	784	784	0	gp2a	ucaucccuuuCCACAGCuuuCuuGAACuuuuuucucugccaagguggcuuaauugagaaagaaaguucaggaaugcugugggaaug	111	pta-MIR396,pde-MIR396,pab-MIR396a,pab-MIR396c,pab-MIR396b,smo-MIR396,gma-MIR396c,gma-MIR396g,gma-MIR396b,gma-MIR396f,gma-MIR396d,gma-MIR396k,gma-MIR396i,gma-MIR396e,gma-MIR396a,gma-MIR396h,gma-MIR396j,aau-MIR396,amg-MIR396,lja-MIR396,mtr-MIR396a,mtr-MIR396b,mtr-MIR396c,cca-MIR396a,cca-MIR396c,cca-MIR396b,ath-MIR396b,ath-MIR396a,bna-MIR396a,aly-MIR396b,aly-MIR396a,cpa-MIR396,cme-MIR396c,cme-MIR396…	pta-MIR396	gaatcttgtcatacttTTCCACAGCTTTCTTGAACTTtacgtgtacgggacgaggagattctgatttctacgtctgcgattaaagttcaagaaaactgtgggaaagcatggtaggattc	pta-miR396	TTCCACAGCTTTCTTGAACTT	5'	13625	10097	5599	4498	7.77209e+06	4399004	3.37309e+06	7.6107e+06	4399004	3.2117e+06	0	y	.......((((((((((.((((((((((((((((((.(((.....)))......))).))))))))))))))).))))))))))..	2	0	0	-39.7	31	20
pda-miR164-p3	vun-MIR164-p3	UUGCACGUGCCCUGCUUCUCC	-	7299	7386	0	0	PDK_30s740201	21	88	-43.7	1	0	0	1	0	gp2a	2	810	810	0	gp2a	ucauguuggagaaggggagcacgugcaaagauugcuagagagguagagaaggggaaggcuuuGCACGuGCCCuGCuuCuCCaacaagg	3	vun-MIR164,cpa-MIR164d,cpa-MIR164e,	vun-MIR164	tgtTGGAGAAGGGGAGCACGTGCAagatcagacggagggagagagacgttgcacgtgccctgcttctccaac	vun-MIR164-p3	ttgcacgtgccctgcttctcc	3'	2	1	1	0	810	810	0	810	810	0	0	y	...((((((((((((((.((((((((((((.((.((...............)).))..))))))))))))))).)))))))))))...	1	1	2	-43.7	30	20
pda-miR393a	gma-miR393a	UCCAAAGGGAUCGCAUUGAUC	+	10967	11083	0	0	PDK_30s903071	21	117	-57.9	143	12.5	0.5	128.5	1.5	gp2a	106	781	781	0	gp2a	ucuguggcaagaggaagcauCCAAAGGGAuCGCAuuGAuCcguucuuuacaagcauuuuguugagacaguggaacucggAuCAuGCGAuCCuuuuGGAuaccuccucucgccauuuc	56	gma-MIR393j,gma-MIR393g,gma-MIR393c,gma-MIR393e,gma-MIR393a,gma-MIR393i,gma-MIR393h,gma-MIR393k,gma-MIR393d,gma-MIR393f,mtr-MIR393a,mtr-MIR393b,htu-MIR393a,htu-MIR393c,htu-MIR393b,ath-MIR393b,ath-MIR393a,bna-MIR393,aly-MIR393b,aly-MIR393a,cpa-MIR393,cme-MIR393b,cme-MIR393c,cme-MIR393a,mes-MIR393b,mes-MIR393d,mes-MIR393a,mes-MIR393c,rco-MIR393,lus-MIR393b,lus-MIR393d,lus-MIR393a,lus-MIR393c,ghr-MI…	gma-MIR393f	ggaggaggcaTCCAAAGGGATCGCATTGATCccaaatccaagctttaatatttttctctcttctcactcaataatattaatttaTTTGGGATCATGCTATCCCTTtggatttctcctt	gma-miR393a	TCCAAAGGGATCGCATTGATC	5'	269	143	139.5	3.5	97802	95184	2618	97694	95184	2510	0	y	...(((((.((((((...(((((((((((((((((.((((((((((.......((......)).......)))))..))))))))))))))))))))))...)))))).)))))...	1	1	1	-57.9	38	20
pda-miR393b-3p_R-1_2ss5A-21GT	zma-miR393b-3p_R-1_2ss5A-21GT	AUCAUGCGAUCCUUUUGGAU	+	10967	11083	0	0	PDK_30s903071	20	117	-57.9	1.5	0	0.5	0.5	0.5	gp2a	2	767	767	0	gp2a	ucuguggcaagaggaagcauCCAAAGGGAuCGCAuuGAuCcguucuuuacaagcauuuuguugagacaguggaacucggAuCAuGCGAuCCuuuuGGAuaccuccucucgccauuuc	56	gma-MIR393j,gma-MIR393g,gma-MIR393c,gma-MIR393e,gma-MIR393a,gma-MIR393i,gma-MIR393h,gma-MIR393k,gma-MIR393d,gma-MIR393f,mtr-MIR393a,mtr-MIR393b,htu-MIR393a,htu-MIR393c,htu-MIR393b,ath-MIR393b,ath-MIR393a,bna-MIR393,aly-MIR393b,aly-MIR393a,cpa-MIR393,cme-MIR393b,cme-MIR393c,cme-MIR393a,mes-MIR393b,mes-MIR393d,mes-MIR393a,mes-MIR393c,rco-MIR393,lus-MIR393b,lus-MIR393d,lus-MIR393a,lus-MIR393c,ghr-MI…	zma-MIR393b	gTCCAAAGGGATCGCATTGATCCatcattccttccattttttcatgcatggctggtcttcgtcgtctgcaaggacttgtcgatggATCAATGCGATCCTTTTGGAGGc	zma-miR393b-3p	ATCAATGCGATCCTTTTGGAGG	3'	269	1.5	1.5	0	1031	1031	0	1031	1031	0	0	y	...(((((.((((((...(((((((((((((((((.((((((((((.......((......)).......)))))..))))))))))))))))))))))...)))))).)))))...	1	1	1	-57.9	38	20
pda-miR393b-3p_R-1_2ss5A-21GT	zma-miR393b-3p_R-1_2ss5A-21GT	AUCAUGCGAUCCUUUUGGAU	-	23571	23687	0	0	PDK_30s732171	20	117	-54.5	1.5	0	0.5	0.5	0.5	gp2a	2	767	767	0	gp2a	ucuguggcacgagggagcauCCAAAGGGAuCGCAuuGAuCCguuuuuuacaggcauuuuuugguggcaauggaacccggAuCAuGCGAuCCuuuuGGAucccuccucuagccauuuc	56	gma-MIR393j,gma-MIR393i,gma-MIR393h,gma-MIR393k,gma-MIR393g,gma-MIR393c,gma-MIR393e,gma-MIR393a,gma-MIR393d,gma-MIR393f,mtr-MIR393a,mtr-MIR393b,htu-MIR393a,htu-MIR393c,htu-MIR393b,ath-MIR393b,ath-MIR393a,bna-MIR393,aly-MIR393b,aly-MIR393a,cpa-MIR393,cme-MIR393b,cme-MIR393c,cme-MIR393a,mes-MIR393d,mes-MIR393c,mes-MIR393b,mes-MIR393a,rco-MIR393,lus-MIR393b,lus-MIR393d,lus-MIR393a,lus-MIR393c,ghr-MI…	zma-MIR393b	gTCCAAAGGGATCGCATTGATCCatcattccttccattttttcatgcatggctggtcttcgtcgtctgcaaggacttgtcgatggATCAATGCGATCCTTTTGGAGGc	zma-miR393b-3p	ATCAATGCGATCCTTTTGGAGG	3'	1015	1.5	1.5	0	1031	1031	0	1031	1031	0	0	y	...(((((..((((((...((((((((((((((((.((((((..((..(...((((......)).))..)..))..)))))))))))))))))))))))))))).....)))))...	1	1	1	-54.5	40	21
pda-miR393a_R+1	gma-miR393a_R+1	UCCAAAGGGAUCGCAUUGAUCU	-	23571	23687	0	1	PDK_30s732171	22	117	-54.5	517	84	5.5	415.5	12	gp2a	791	814	775	1	gp2a	ucuguggcacgagggagcauCCAAAGGGAuCGCAuuGAuCCguuuuuuacaggcauuuuuugguggcaauggaacccggAuCAuGCGAuCCuuuuGGAucccuccucuagccauuuc	56	gma-MIR393j,gma-MIR393i,gma-MIR393h,gma-MIR393k,gma-MIR393g,gma-MIR393c,gma-MIR393e,gma-MIR393a,gma-MIR393d,gma-MIR393f,mtr-MIR393a,mtr-MIR393b,htu-MIR393a,htu-MIR393c,htu-MIR393b,ath-MIR393b,ath-MIR393a,bna-MIR393,aly-MIR393b,aly-MIR393a,cpa-MIR393,cme-MIR393b,cme-MIR393c,cme-MIR393a,mes-MIR393d,mes-MIR393c,mes-MIR393b,mes-MIR393a,rco-MIR393,lus-MIR393b,lus-MIR393d,lus-MIR393a,lus-MIR393c,ghr-MI…	gma-MIR393f	ggaggaggcaTCCAAAGGGATCGCATTGATCccaaatccaagctttaatatttttctctcttctcactcaataatattaatttaTTTGGGATCATGCTATCCCTTtggatttctcctt	gma-miR393a	TCCAAAGGGATCGCATTGATC	5'	1015	517	0.5	516.5	414450	425	414025	394924	425	394499	0	y	...(((((..((((((...((((((((((((((((.((((((..((..(...((((......)).))..)..))..)))))))))))))))))))))))))))).....)))))...	1	1	1	-54.5	40	21
pda-miR169a-3p_L+1R-1_2ss9-C13TC	bdi-miR169a-3p_L+1R-1_2ss9-C13TC	CGGCGAGUCUGUCCUUGGCUAC	+	11818	11926	0	0	PDK_30s724681	22	109	-49	15.5	0	5	7.5	3	gp2a	6	826	826	0	gp2a	ugCAGCCAAGGAuGACuuGCCggcauuagccuuaagaagaggagacucuaccucacuccuaaguugcCGGCGAGuCuGuCCuuGGCuACcuucugcucucuucuucuca	130	pde-MIR169,gma-MIR169p,gma-MIR169d,gma-MIR169s,gma-MIR169c,gma-MIR169h,gma-MIR169e,gma-MIR169b,gma-MIR169g,gma-MIR169v,gma-MIR169f,gma-MIR169u,gma-MIR169a,gma-MIR169m,mtr-MIR169d,mtr-MIR169e,mtr-MIR169a,mtr-MIR169g,mtr-MIR169b,mtr-MIR169l,vun-MIR169,ath-MIR169f,ath-MIR169d,ath-MIR169e,ath-MIR169g,ath-MIR169b,ath-MIR169c,ath-MIR169a,bna-MIR169b,bna-MIR169n,bna-MIR169a,aly-MIR169g,aly-MIR169e,aly-M…	bdi-MIR169a	ggaagggtaggatacgtttttgcttgcccgtggccgcgctaacattaggcttggggactatggtgCAGCCAAGGATGACTTGCCGAtcgaaacgatgcacaatatgcatcgatcGGCGAGTTGTTCTTGGCTACAtcttagctcctgcccctcatgttaggccggcatgcggtggtatgta	bdi-miR169a-3p	GGCGAGTTGTTCTTGGCTACA	3'	1003	15.5	14.5	1	11960	11359	601	11950	11359	591	0	y	...((((((((((((((((((((((((((.....((.((((....))))..)).....))))..)))))))))))).))))))))))......................	1	1	1	-49	32	18
pda-miR169p_L-1R-1_1ss2GC	gma-miR169p_L-1R-1_1ss2GC	CAGCCAAGGAUGACUUGCC	+	11818	11926	0	0	PDK_30s724681	19	109	-49	493.5	15	0	478.5	0	gp2a	319	699	699	0	gp2a	ugCAGCCAAGGAuGACuuGCCggcauuagccuuaagaagaggagacucuaccucacuccuaaguugcCGGCGAGuCuGuCCuuGGCuACcuucugcucucuucuucuca	130	pde-MIR169,gma-MIR169p,gma-MIR169d,gma-MIR169s,gma-MIR169c,gma-MIR169h,gma-MIR169e,gma-MIR169b,gma-MIR169g,gma-MIR169v,gma-MIR169f,gma-MIR169u,gma-MIR169a,gma-MIR169m,mtr-MIR169d,mtr-MIR169e,mtr-MIR169a,mtr-MIR169g,mtr-MIR169b,mtr-MIR169l,vun-MIR169,ath-MIR169f,ath-MIR169d,ath-MIR169e,ath-MIR169g,ath-MIR169b,ath-MIR169c,ath-MIR169a,bna-MIR169b,bna-MIR169n,bna-MIR169a,aly-MIR169g,aly-MIR169e,aly-M…	gma-MIR169p	gagtacgattTGAGCCAAGGATGACTTGCCGacatgtggaaaagcttaatcccttttcaaggtgttgtcggcgaggaatctgggctcatttgtgctcc	gma-miR169p	TGAGCCAAGGATGACTTGCCG	5'	1003	493.5	493.5	0	332785	332785	0	332785	332785	0	0	y	...((((((((((((((((((((((((((.....((.((((....))))..)).....))))..)))))))))))).))))))))))......................	1	1	1	-49	32	18
pda-miR156b	smo-miR156b	CUGACAGAAGAUAGAGAGCAC	-	182624	182715	0	0	PDK_30s767921	21	92	-47	1020.5	107.5	76	803	34	gp2a	909	778	778	0	gp2a	ugcugCuGACAGAAGAuAGAGAGCACauaugaugagaugcauggugcuucgcaucucacuccucuguGCuCuCuAuGCuuCuGuCAuCaccu	103	smo-MIR156b,gma-MIR156m,gma-MIR156i,gma-MIR156e,gma-MIR156l,gma-MIR156r,gma-MIR156d,gma-MIR156b,gma-MIR156f,gma-MIR156u,gma-MIR156a,ahy-MIR156c,ahy-MIR156a,mtr-MIR156g,mtr-MIR156a,han-MIR156c,han-MIR156b,cca-MIR156b,har-MIR156a,hpa-MIR156a,ath-MIR157d,ath-MIR156j,ath-MIR156a,ath-MIR156b,ath-MIR156i,ath-MIR156c,bna-MIR156d,bna-MIR156e,aly-MIR157d,aly-MIR156a,aly-MIR156b,aly-MIR156c,cpa-MIR156e,cpa…	smo-MIR156b	tggactgctgCTGACAGAAGATAGAGAGCACagacgtttggctgcaagagcggaatccatatccagcagctctgcgttcgtgctctctattcttctgtcatcaatctttcga	smo-miR156b	CTGACAGAAGATAGAGAGCAC	5'	1038	1020.5	940	80.5	789686	729103	60583.5	787016	729103	57913.5	0	y	...((.(((((((((((((((((((((...((((((((((..........)))))))).))...)))))))))))).))))))))).))...	1	1	1	-47	33	20
pda-miR156c-p3	han-MIR156c-p3	GCUCUCUAUGCUUCUGUCAUU	-	37243	37333	0	1	PDK_30s1168861	21	91	-48.6	1.5	0.5	0	1	0	gp2a	2	769	743	1	gp2a	ugcuguuGACAGAAGAuAGAGAGCACagaugaugacaugcaaggcccuuugcaucucauuccuuuguGCuCuCuAuGCuuCuGuCAuCacc	7	mtr-MIR156g,han-MIR156c,cme-MIR156e,bcy-MIR156,ppe-MIR156h,ptc-MIR156l,vvi-MIR156f,	han-MIR156c	atgTTGACAGAAGATAGAGAGCACagagaagcatgaattgcacatagatattgcaattcactccttcgtgctctctatgcttctgtcattacc	han-MIR156c-p3	gctctctatgcttctgtcatt	3'	26	1.5	0	1.5	1194.5	0	1194.5	1148	0	1148	0	y	...((.(((((((((((((((((((((((.(((((.(((((((....))))))).)))))..)))))))))))))).))))))))).))..	1	1	1	-48.6	37	20
pda-miR156e	mtr-miR156e	UUGACAGAAGAUAGAGAGCAC	+	3549	3639	0	0	PDK_30s724381	21	91	-41.1	13736.5	1842	235	11333.5	326	gp1b	23282	778	778	0	gp1b	ugcuguuGACAGAAGAuAGAGAGCACggaugaugagaugcauggcgcucugcaucgcauuccuuugugcucucuaugcuucugccaucacc	1	mtr-MIR156h,	mtr-MIR156h	tgctgTTGACAGAAGATAGAGAGCACagatgatgaaatgcatggaaggcaatggcatctcattcctttgtGCTCTTTATTCTTCTGTCATCacc	mtr-miR156e	TTGACAGAAGATAGAGAGCAC	5'	27472	13736.5	12954	782.5	1.06019e+07	9992156	609708	1.05745e+07	9992156	582336	0	y	...((.((.(((((((((((((((((..(.((((.((((((........)))))).))))..)..))))))))))).)))))).)).))..	2	1	1	-41.1	32	19
pda-miR171	pde-miR171	UGAUUGAGCCGUGCCAAUAUC	-	18931	19042	0	0	PDK_30s65509100	21	112	-54.7	796	59	4.5	717	15.5	gp2a	1376	777	777	0	gp2a	ugugagccgcaagaacgggauauuggcccgguucaauuugaaaacgcugcuccuuggcugggagcucugauuuuuGAuuGAGCCGuGCCAAuAuCacguuucacugcucauu	141	pde-MIR171,smo-MIR171a,smo-MIR171b,gma-MIR171u,gma-MIR171c,gma-MIR171g,gma-MIR171o,gma-MIR171a,gma-MIR171e,gma-MIR171j,gma-MIR171f,gma-MIR171i,gma-MIR171q,lja-MIR171a,mtr-MIR171d,mtr-MIR171f,mtr-MIR171c,htu-MIR171a,hpa-MIR171a,ath-MIR171c,ath-MIR171b,ath-MIR170,ath-MIR171a,bna-MIR171b,bna-MIR171e,bna-MIR171c,bna-MIR171a,bna-MIR171d,bna-MIR171f,bna-MIR171g,bra-MIR171a,aly-MIR171b,aly-MIR171c,aly-M…	pde-MIR171	gaaagaatgtgatgttggctaggctcaatcggattgtaacgcccacggaatttggtcttgtgatcTGATTGAGCCGTGCCAATATCacattctaac	pde-miR171	TGATTGAGCCGTGCCAATATC	3'	1575	796	777.5	18.5	612873	598754	14119.5	612210	598754	13457	0	y	.((((((.....(((((.(((((((((.((((((((((..(((.((..((((((.....))))))..)).)))..)))))))))).))))))))).)))))....)))))).	2	0	0	-54.7	41	19
pda-miR828a	gma-miR828a	UCUUGCUCAAAUGAGUAUUCCA	+	3472	3596	0	0	PDK_30s680231	22	125	-56.9	44	3	0	39	2	gp2a	35	815	815	0	gp2a	uucccaugggaaggcuuCuuGCuCAAAuGAGuAuuCCAuugagaaagaugaugcuccgugcucucccagaguacugcgggcuuuaaaaugaaauacucauuugggcaagaugucuugcauggaag	14	gma-MIR828b,gma-MIR828a,cme-MIR828,mes-MIR828a,mes-MIR828b,ssl-MIR828,lus-MIR828a,mdm-MIR828b,mdm-MIR828a,ppe-MIR828,ptc-MIR828b,ptc-MIR828a,vvi-MIR828a,vvi-MIR828b,	gma-MIR828a	ttgtaatgttTCTTGCTCAAATGAGTATTCCAaccacagtcacatttggcatgaatattgtgtgccactgtcctcaaaggatgagatgctcatttgaccaagcaatgttaaaa	gma-miR828a	TCTTGCTCAAATGAGTATTCCA	5'	44	44	43	1	34827	34155	672	34817	34155	662	0	y	...(((((..(((((.(((((((((((((((((((.((((...((((....(((...((((((.....)))))).)))..))))..)))).))))))))))))))))))).))))).)))))...	2	0	0	-56.9	46	21
pda-miR169l-3p_L-2R-1_1ss13TC	gma-miR169l-3p_L-2R-1_1ss13TC	GGCAAGUUGUCUUUGGCUA	+	17994	18172	0	0	PDK_30s664611	19	179	-85.3	144	10	2.5	131	0.5	gp2a	170	696	696	0	gp2a	uucucaucuauggauucaccuugggcucaggaaguauggugCAGCCAAGGAuGACuuGCCGAcccuucgauagaauuuucucuugugccuccuuuggaggaauuuuagagaaagaggcuGGCAAGuuGuCuuuGGCuAcaucuuauuuccugcuccugaugugaggccugugaugauac	107	pde-MIR169,gma-MIR169b,gma-MIR169g,gma-MIR169v,gma-MIR169f,gma-MIR169u,gma-MIR169a,gma-MIR169m,gma-MIR169l,gma-MIR169p,gma-MIR169c,mtr-MIR169a,mtr-MIR169g,mtr-MIR169b,mtr-MIR169l,vun-MIR169,ath-MIR169a,ath-MIR169b,ath-MIR169c,ath-MIR169d,ath-MIR169e,bna-MIR169b,bna-MIR169a,bna-MIR169n,aly-MIR169a,aly-MIR169c,aly-MIR169b,aly-MIR169e,aly-MIR169d,cme-MIR169h,cme-MIR169f,mes-MIR169g,mes-MIR169c,mes-M…	gma-MIR169l	gagtgatttgCAGCCAAGAATGACTTGCCGGaatgcatatatatgcattaggtaccaacatatatagttgtattgtataatttCGGGCAAGTTGTTTTTGGCTACatttatctc	gma-miR169l-3p	CGGGCAAGTTGTTTTTGGCTAC	3'	3772	144	137	7	101244	96075	5169	101025	96075	4950	0	y	...(((((...((..((((.(..((..(((((((((.((((.(((((((((..(((((((..((.(((....))).(((((((....(((((...)))))......)))))))..))..)))))))..))))))))).)))).)))))))))..))..).))))..))...)))))...	4	0	0	-85.3	45	16
pda-miR168a	gma-miR168a	UCGCUUGGUGCAGGUCGGGAA	-	8624	8770	0	0	PDK_30s760991	21	147	-73.8	228.5	19	49.5	125.5	34.5	gp2a	367	763	763	0	gp2a	uucucgccgccuucucgaauuCGCuuGGuGCAGGuCGGGAAccguuucaggugcguccgauucgaucacgaugugaucaggagcguccguuauggugcacccgguucuccacuugcaucaacugaauucgagaacguuuggcgaaag	33	gma-MIR168b,gma-MIR168a,mtr-MIR168c,mtr-MIR168b,vun-MIR168,cca-MIR168a,ath-MIR168a,ath-MIR168b,bna-MIR168a,bna-MIR168b,aly-MIR168a,aly-MIR168b,cme-MIR168,mes-MIR168a,rco-MIR168,lus-MIR168b,lus-MIR168a,tcc-MIR168,mdm-MIR168a,mdm-MIR168b,ppe-MIR168,crt-MIR168,ccl-MIR168,ptc-MIR168a,ptc-MIR168b,sly-MIR168b,sly-MIR168a,nta-MIR168d,nta-MIR168e,nta-MIR168a,nta-MIR168b,nta-MIR168c,vvi-MIR168,	gma-MIR168a	cactgtgcggtctctaatTCGCTTGGTGCAGGTCGGGAAccggttttcgcgcggaatggaggagcggtcgccggcgccgaattggatcccgccttgcatcaactgaatcggaggccgcggtgaac	gma-miR168a	TCGCTTGGTGCAGGTCGGGAA	5'	457	228.5	200.5	28	174243	153170	21073	173249	153170	20079	0	y	...(((((((.(((((((((((..(((((((((((.((((((((.....((((((.(((....((((((...)))))).((.....))....))))))))))))))))).)))))))))))..))))))))))).))..)))))...	4	0	0	-73.8	46	18
pda-miR168a_R-1	gma-miR168a_R-1	UCGCUUGGUGCAGGUCGGGA	+	1556	1699	0	0	PDK_30s842691	20	144	-77.5	439.5	24	51	336.5	28	gp2a	733	733	733	0	gp2a	uucucgcugcuuucucgagcuCGCuuGGuGCAGGuCGGGAcccgucuugggaccguccgaucucugggagaccgaucaggcacguccguucgauaggccgguuCCCGACuuGCAuCAACuGAguucgagaacccucggcgaaag	33	gma-MIR168b,gma-MIR168a,mtr-MIR168c,mtr-MIR168b,vun-MIR168,cca-MIR168a,ath-MIR168a,ath-MIR168b,bna-MIR168a,bna-MIR168b,aly-MIR168a,aly-MIR168b,cme-MIR168,mes-MIR168a,rco-MIR168,lus-MIR168a,lus-MIR168b,tcc-MIR168,mdm-MIR168a,mdm-MIR168b,ppe-MIR168,crt-MIR168,ccl-MIR168,ptc-MIR168b,ptc-MIR168a,sly-MIR168a,sly-MIR168b,nta-MIR168d,nta-MIR168a,nta-MIR168b,nta-MIR168e,nta-MIR168c,vvi-MIR168,	gma-MIR168a	cactgtgcggtctctaatTCGCTTGGTGCAGGTCGGGAAccggttttcgcgcggaatggaggagcggtcgccggcgccgaattggatcccgccttgcatcaactgaatcggaggccgcggtgaac	gma-miR168a	TCGCTTGGTGCAGGTCGGGAA	5'	890	439.5	439.5	0	319294	319294	0	319294	319294	0	0	y	...((((((..(((((((((((..((((((((((((((((.(((.((((((((.(((.((((...((....)))))).)))..))))......)))).))).))))))))))))))))..)))))))))))....))))))...	4	0	0	-77.5	53	18
pda-miR168c-3p_R-2_1ss5CA	mtr-miR168c-3p_R-2_1ss5CA	CCCGACUUGCAUCAACUGA	+	1556	1699	0	0	PDK_30s842691	19	144	-77.5	7.5	1	1	4.5	1	gp2a	6	703	703	0	gp2a	uucucgcugcuuucucgagcuCGCuuGGuGCAGGuCGGGAcccgucuugggaccguccgaucucugggagaccgaucaggcacguccguucgauaggccgguuCCCGACuuGCAuCAACuGAguucgagaacccucggcgaaag	33	gma-MIR168b,gma-MIR168a,mtr-MIR168c,mtr-MIR168b,vun-MIR168,cca-MIR168a,ath-MIR168a,ath-MIR168b,bna-MIR168a,bna-MIR168b,aly-MIR168a,aly-MIR168b,cme-MIR168,mes-MIR168a,rco-MIR168,lus-MIR168a,lus-MIR168b,tcc-MIR168,mdm-MIR168a,mdm-MIR168b,ppe-MIR168,crt-MIR168,ccl-MIR168,ptc-MIR168b,ptc-MIR168a,sly-MIR168a,sly-MIR168b,nta-MIR168d,nta-MIR168a,nta-MIR168b,nta-MIR168e,nta-MIR168c,vvi-MIR168,	mtr-MIR168c	ctcacttcgcggtctctaatTCGCTTGGTGCAGGTCGGGAAccactacatccgctgttttcgtagaaaccggcggtgaattggatCCCGCCTTGCATCAACTGAATcggaggccgcggtgaatcta	mtr-miR168c-3p	CCCGCCTTGCATCAACTGAAT	3'	890	7.5	7.5	0	5191.5	5191.5	0	5191.5	5191.5	0	0	y	...((((((..(((((((((((..((((((((((((((((.(((.((((((((.(((.((((...((....)))))).)))..))))......)))).))).))))))))))))))))..)))))))))))....))))))...	4	0	0	-77.5	53	18
pda-miR156a_L+1R-1	ppt-miR156a_L+1R-1	CUGACAGAAGAGAGUGAGCA	+	208235	208332	0	0	PDK_30s839411	20	98	-51.2	880.5	116	43.5	708.5	12.5	gp2a	696	733	733	0	gp2a	uugggggCuGACAGAAGAGAGuGAGCAcacagcgaggcaauugcaucagggaaugccguucccguuGCGuGCuCuCuuCuCuuuCugucaacccuccg	170	ppt-MIR156b,ppt-MIR156c,ppt-MIR156a,smo-MIR156a,smo-MIR156b,gma-MIR156h,gma-MIR156v,gma-MIR156a,gma-MIR156x,gma-MIR156o,gma-MIR156q,gma-MIR156s,gma-MIR156u,gma-MIR156w,gma-MIR156y,gma-MIR156k,gma-MIR156n,mtr-MIR156i,mtr-MIR156c,mtr-MIR156d,mtr-MIR156b,vun-MIR156a,han-MIR156b,han-MIR156a,htu-MIR156a,cca-MIR156a,cca-MIR156b,har-MIR156a,hci-MIR156a,ath-MIR156e,ath-MIR156a,ath-MIR156d,ath-MIR156f,ath…	ppt-MIR156a	ggcggtggaggatgtgggagTGACAGAAGAGAGTGAGCACagctgagcatgtacatgaggaagtacttgcccatgtgtgctcactctcttcctgtcgcacctctcctttgacgct	ppt-miR156a	TGACAGAAGAGAGTGAGCAC	5'	1687	880.5	365	515.5	652214	265840	386373	635442	265840	369602	0	y	..(((((.(((((((((((((.((((((.(((((.((.((..((((......))))..))))))))).)))))).).)))).)))))))).))).)).	2	1	2	-51.2	37	18
pda-miR394a-p3	mdm-MIR394a-p3	AGCUCUGUUGGCUUCUCUUUG	-	7977	8134	0	0	PDK_30s801231	21	158	-67.7	12	0	0	12	0	gp2a	21	789	789	0	gp2a	uugucauguggauuuaucaaagggucucuuacagaggucauuGGCAuGCuGuCCACCuCCaaauccucuaucuagacggccaaaggggaagagaaauggaggugggcauccugccaacugAGCuCuGuuGGCuuCuCuuuGcaaaacccauaugaaag	47	gma-MIR394g,gma-MIR394d,gma-MIR394f,gma-MIR394b,gma-MIR394e,gma-MIR394a,gma-MIR394c,ahy-MIR394,cca-MIR394,ath-MIR394b,ath-MIR394a,bna-MIR394b,bna-MIR394a,aly-MIR394b,aly-MIR394a,cpa-MIR394b,cpa-MIR394a,cme-MIR394a,cme-MIR394b,mes-MIR394c,mes-MIR394a,mes-MIR394b,ssl-MIR394,lus-MIR394b,lus-MIR394a,ghr-MIR394b,ghr-MIR394a,tcc-MIR394a,tcc-MIR394b,mdm-MIR394b,mdm-MIR394a,ppe-MIR394a,ppe-MIR394b,csi-MI…	mdm-MIR394a	tcacgtgggttttgcaaagagtttcttacagagttctTTGGCATTCTGTCCACCTCCcccctctctctgtgtgtctgtggctcaatggatggaggtgggcatactgccaacagagctctgttggcttctctttgtaaaacccccgtga	mdm-MIR394a-p3	agctctgttggcttctctttg	3'	994	12	12	0	9274	9274	0	9274	9274	0	0	y	...((((((((.(((..(((((((...(..((((((.(((((((((...((((((((((((....((((..((............))..))))...))))))))))))...)))))).))).))))))..)...)))))))..))).))))))))...	6	0	0	-67.7	52	17
pda-miR394a-5p	gma-miR394a-5p	UUGGCAUUCUGUCCACCUCC	+	30142	30317	0	0	PDK_30s1003471	20	176	-83.8	37.5	2.5	2	30	3	gp2a	64	738	738	0	gp2a	uuuaugcgagucauauagguuugucaaagggcuucuuacagaguucauuGGCAuuCuGuCCACCuCCaucagggcaaacguaacguggggcggaggcaauggaaauggaggugggcaaccugccaagggagcucuguuggauucucuuuguaaaaccuaugugaugauuggauucu	47	gma-MIR394e,gma-MIR394d,gma-MIR394g,gma-MIR394f,gma-MIR394b,gma-MIR394a,gma-MIR394c,ahy-MIR394,cca-MIR394,ath-MIR394b,ath-MIR394a,bna-MIR394b,bna-MIR394a,aly-MIR394b,aly-MIR394a,cpa-MIR394b,cpa-MIR394a,cme-MIR394a,cme-MIR394b,mes-MIR394c,mes-MIR394a,mes-MIR394b,ssl-MIR394,lus-MIR394a,lus-MIR394b,ghr-MIR394b,ghr-MIR394a,tcc-MIR394b,tcc-MIR394a,mdm-MIR394b,mdm-MIR394a,ppe-MIR394a,ppe-MIR394b,csi-MI…	gma-MIR394c	cagagtttcTTGGCATTCTGTCCACCTCCacttccactttcagttccatggatctctctctctttttggccctatctacgtactcggaggtggacatactgccaatagag	gma-miR394a-5p	TTGGCATTCTGTCCACCTCC	5'	75	37.5	34	3.5	27471.5	24747	2724.5	27338	24747	2591	0	y	...((.((((((((((((((((..(((((((..((..(((((((((.((((((...(((((((((((((((..((...(((........)))...))..))...)))))))))))))...))))))..)))))))))..))..)))))))..)))))))))))))..))).))...	6	0	0	-83.8	62	17
pda-miR156a_L+1	ppt-miR156a_L+1	CUGACAGAAGAGAGUGAGCAC	+	12219	12344	0	0	PDK_30s655941	21	126	-62	13473	2133	715	10394.5	230.5	gp2a	23808	774	774	0	gp2a	uuuggcuggcuugcugacuugggCuGACAGAAGAGAGuGAGCACacgccggcgauggcagcaugaagggaugcuguucccguugcguGCuCACuuCuCuuuCuGuCAGCuucccuugccugcucua	163	ppt-MIR156b,ppt-MIR156c,ppt-MIR156a,smo-MIR156a,gma-MIR156a,gma-MIR156u,gma-MIR156h,gma-MIR156v,gma-MIR156x,gma-MIR156o,gma-MIR156q,gma-MIR156s,gma-MIR156w,gma-MIR156y,gma-MIR156k,gma-MIR156n,mtr-MIR156i,mtr-MIR156c,mtr-MIR156d,mtr-MIR156b,mtr-MIR156j,vun-MIR156a,han-MIR156b,han-MIR156a,htu-MIR156a,cca-MIR156a,cca-MIR156b,har-MIR156a,hci-MIR156a,ath-MIR156a,ath-MIR156b,ath-MIR156c,ath-MIR156e,ath…	ppt-MIR156a	ggcggtggaggatgtgggagTGACAGAAGAGAGTGAGCACagctgagcatgtacatgaggaagtacttgcccatgtgtgctcactctcttcctgtcgcacctctcctttgacgct	ppt-miR156a	TGACAGAAGAGAGTGAGCAC	5'	28129	13473	12370	1103	10346056	9533066	812990	1.03104e+07	9533066	777296	0	y	...(((.(((.....((....(((((((((((((((((((((((.(..(((.((..(((((((......))))))))))))..).)))))))).)))).)))))))))))))....))).)))...	1	1	2	-62	44	21
pda-miR168a_R+3	gma-miR168a_R+3	UCGCUUGGUGCAGGUCGGGAACGG	-	1834	1964	0	0	PDK_30s675901	24	131	-63.6	52.5	2.5	3	39.5	7.5	gp2a	41	883	883	0	gp2a	uuuuauuguggucgccgccgccucugauuCGCuuGGuGCAGGuCGGGAACGGcuccauguuuugccugccggcgagcuggauCCCGCCuuGCAuCAACuGAAucggagccggaaugcgaagaucgaugcuc	41	gma-MIR168a,gma-MIR168b,mtr-MIR168b,mtr-MIR168c,vun-MIR168,cca-MIR168a,ath-MIR168b,ath-MIR168a,bna-MIR168a,bna-MIR168b,aly-MIR168b,aly-MIR168a,cme-MIR168,mes-MIR168a,rco-MIR168,lus-MIR168a,lus-MIR168b,tcc-MIR168,mdm-MIR168b,mdm-MIR168a,ppe-MIR168,crt-MIR168,ccl-MIR168,ptc-MIR168a,ptc-MIR168b,sly-MIR168b,sly-MIR168a,nta-MIR168d,nta-MIR168a,nta-MIR168e,nta-MIR168c,nta-MIR168b,vvi-MIR168,bdi-MIR168,…	gma-MIR168b	cggtctctaatTCGCTTGGTGCAGGTCGGGAAccggttttcgcgcggaatggaggaacggtcgccggcggcgaattggatcccgccttgcatcaactgaatcggaggccg	gma-miR168a	TCGCTTGGTGCAGGTCGGGAA	5'	575	52.5	26.5	26	41507.5	22535.5	18972	40572.5	22535.5	18037	0	y	...(((((...((((..(((.(((((((((..((((((((((.(((((.((((((........(((....)))))))))..))))).))))))))))..))))))))).)))...))))....)))))...	4	1	1	-63.6	45	20
pda-miR168a-3p_R-1_1ss3TC	sly-miR168a-3p_R-1_1ss3TC	CCCGCCUUGCAUCAACUGAA	-	1834	1964	0	0	PDK_30s675901	20	131	-63.6	235	6.5	6.5	212	10	gp2a	395	736	736	0	gp2a	uuuuauuguggucgccgccgccucugauuCGCuuGGuGCAGGuCGGGAACGGcuccauguuuugccugccggcgagcuggauCCCGCCuuGCAuCAACuGAAucggagccggaaugcgaagaucgaugcuc	41	gma-MIR168a,gma-MIR168b,mtr-MIR168b,mtr-MIR168c,vun-MIR168,cca-MIR168a,ath-MIR168b,ath-MIR168a,bna-MIR168a,bna-MIR168b,aly-MIR168b,aly-MIR168a,cme-MIR168,mes-MIR168a,rco-MIR168,lus-MIR168a,lus-MIR168b,tcc-MIR168,mdm-MIR168b,mdm-MIR168a,ppe-MIR168,crt-MIR168,ccl-MIR168,ptc-MIR168a,ptc-MIR168b,sly-MIR168b,sly-MIR168a,nta-MIR168d,nta-MIR168a,nta-MIR168e,nta-MIR168c,nta-MIR168b,vvi-MIR168,bdi-MIR168,…	sly-MIR168a	ctcttatTCGCTTGGTGCAGGTCGGGACctcattcgccggcgccgggaataatgccggacgaacgacggcggtgttaattctactaaagctgtcaccgacggatagatgtttgattagcggcgaaatttgggtCCTGCCTTGCATCAACTGAATtggag	sly-miR168a-3p	CCTGCCTTGCATCAACTGAAT	3'	575	235	215.5	19.5	172904	157854	15050	172352	157854	14498.5	0	y	...(((((...((((..(((.(((((((((..((((((((((.(((((.((((((........(((....)))))))))..))))).))))))))))..))))))))).)))...))))....)))))...	4	1	1	-63.6	45	20
pda-miR394a-3p_R+1_3ss11AC19TC20GT	zma-miR394a-3p_R+1_3ss11AC19TC20GT	AGGUGGGCAUCCUGCCAACUG	-	8517	8707	0	1	PDK_30s918941	21	191	-83.9	1	0	0	1	0	gp2a	1	677	642	1	gp2a	uuuuauugugguugucauguggguuuaucaaaggguaucuuacagaggucauuGGCAuuCuGuCCACCuuCaaauucucugcuucuuaucuuauaugcaaagaggaagaaaaauggAGGuGGGCAuCCuGCCAACCGaucucuguuggcuucucuuuguaaaacccacaugauagaauuucucccauagug	47	gma-MIR394g,gma-MIR394d,gma-MIR394f,gma-MIR394b,gma-MIR394e,gma-MIR394a,gma-MIR394c,ahy-MIR394,cca-MIR394,ath-MIR394b,ath-MIR394a,bna-MIR394b,bna-MIR394a,aly-MIR394b,aly-MIR394a,cpa-MIR394b,cpa-MIR394a,cme-MIR394a,cme-MIR394b,mes-MIR394c,mes-MIR394a,mes-MIR394b,ssl-MIR394,lus-MIR394b,lus-MIR394a,ghr-MIR394b,ghr-MIR394a,tcc-MIR394a,tcc-MIR394b,mdm-MIR394b,mdm-MIR394a,ppe-MIR394a,ppe-MIR394b,csi-MI…	zma-MIR394b	tggcgcttactgagagttccTTGGCATTCTGTCCACCTCCcttcttgacgatcttgcagaaagtttgctttttttgtttgtttggAGGTGGGCATACTGCCAATGgagctgcgtaggcctcc	zma-miR394a-3p	AGGTGGGCATACTGCCAATG	3'	87	1	0.5	0.5	605	266.5	338.5	587.5	266.5	321	0	y	...(((((((((((((((((((((((..(((((((...(..(((((((((.((((((...((((((((((((.....(((.((((((............)))))).)))....))))))))))))...))))))..)))))))))..)...)))))))..)))))))))))))))........))))))))	6	0	0	-83.9	67	17
[truncated: 8 more columns]
