# Supplementary material for: A genome-wide identification of the miRNAome in response to salinity stress in date palm (Phoenix dactylifera L.)
Source: Front Plant Sci. 2015 Nov 5;6:946. doi: 10.3389/fpls.2015.00946 (PMC4633500; doi:10.3389/fpls.2015.00946)
Supplement: Supplementary file 2 [file Table2.XLSX]

## Sheet: Sheet1
Table S2. Variant miRNA sequences identified from P. dactylifera L. leaves and roots and their corresponding precursors.
			Genome Location (precursor)			Mismatch						Number of reads						for the representative read (most abundant) in the cluster						miRbase information (rep: representative)							number of reads of 5' and 3'	number of reads of 5' or 3'			sequencing quality score							internal use only	UNAFold: hairpin structure prediction
MicrRNA	miRBase results	Mature Sequence (5’-3’)	strand	start	end	on miRbase	on genome	Chromosome number	Length of the mature miRNA	Length of the precursor	Minimal folding free energy	Count in the combined library	Control-Leaves	Control-Root	NaCl-Leaves	NaCl-Root	group	#copy of the miRNA	score(all) of the miRNA	score(mapped) of the miRNA	#error of the miRNA	group	genome_seq	#mir	mirIDs,	rep_mirID	rep_mirSeq	rep_miRID	rep_miRSeq	type	#reads(all for cluster)	#reads(all)	#reads(0err)	#reads(>0err)	score(all)	score(0err)	score(>0err)	score(mapped)	score(mapped,0err)	score(mapped,>0err)	#base_inLoop	flag	SS	#maxError(a spot in mature region)	#maxBiasedError (in mature region)	#biasedBulge (in mature region)	dG	#bp (in stem)	#bp (in mature region)
pda-miR164-p3_1ss8TC	cca-MIR164-p3_1ss8TC	CACGTGCCCTACCTCTCC	+	7920	8032	1	0	PDK_30s946341	18	113	-58.9	2	0	0	1	1	gp2a	1	686	686	0	gp2a	aaaagggtcgggcaagccgtgcTGGAGAAGCAGGGCACGTGTTcgcgacatcggatcgatgccatcggcaCACGTGCCCTACCTCTCCagttcggacactcgcccatcctgct	90	cln-MIR164,gma-MIR164e,gma-MIR164j,gma-MIR164f,gma-MIR164h,gma-MIR164c,gma-MIR164i,gma-MIR164g,gma-MIR164d,gma-MIR164a,gma-MIR164b,gma-MIR164k,mtr-MIR164c,mtr-MIR164a,mtr-MIR164b,cca-MIR164,hci-MIR164a,ath-MIR164a,ath-MIR164b,ath-MIR164c,bna-MIR164d,bna-MIR164a,bna-MIR164c,bna-MIR164b,bra-MIR164a,aly-MIR164b,aly-MIR164c,aly-MIR164a,cpa-MIR164c,cpa-MIR164b,cpa-MIR164a,cme-MIR164a,cme-MIR164d,cme-M…	cca-MIR164	ctttgtTGGAGAAGCAGGGTACGTGCAacgatagaaacgacgagttgttgtttattgcacgtgctctacctctccaacgtaga	cca-MIR164-p3	cacgtgctctacctctcc	3'	18	2	2	0	1319	1319	0	1319	1319	0	0	y	...(((((.((((.(((((..(((((((...((((((((((((((...(((((...)))))....))).)))))))))))...)))))))..)))...)).)))))))))...	6	1	1	-58.9	40	18
pda-miR164_2ss20CT21GT	cln-miR164_2ss20CT21GT	TGGAGAAGCAGGGCACGTGTT	+	7920	8032	2	0	PDK_30s946341	21	113	-58.9	12	0	9.5	0	2.5	gp2a	8	721	721	0	gp2a	aaaagggtcgggcaagccgtgcTGGAGAAGCAGGGCACGTGTTcgcgacatcggatcgatgccatcggcaCACGTGCCCTACCTCTCCagttcggacactcgcccatcctgct	90	cln-MIR164,gma-MIR164e,gma-MIR164j,gma-MIR164f,gma-MIR164h,gma-MIR164c,gma-MIR164i,gma-MIR164g,gma-MIR164d,gma-MIR164a,gma-MIR164b,gma-MIR164k,mtr-MIR164c,mtr-MIR164a,mtr-MIR164b,cca-MIR164,hci-MIR164a,ath-MIR164a,ath-MIR164b,ath-MIR164c,bna-MIR164d,bna-MIR164a,bna-MIR164c,bna-MIR164b,bra-MIR164a,aly-MIR164b,aly-MIR164c,aly-MIR164a,cpa-MIR164c,cpa-MIR164b,cpa-MIR164a,cme-MIR164a,cme-MIR164d,cme-M…	cln-MIR164	cctggTGGAGAAGCAGGGCACGTGCGatacacagaaacaattgtataaaccattatcgcatgtgctttccttctccaccaggc	cln-miR164	TGGAGAAGCAGGGCACGTGCG	5'	18	12	11.5	0.5	8593.5	8209.5	384	8574.5	8209.5	365	0	y	...(((((.((((.(((((..(((((((...((((((((((((((...(((((...)))))....))).)))))))))))...)))))))..)))...)).)))))))))...	6	1	1	-58.9	40	18
pda-miR529e_1ss21CT	ppt-miR529e_1ss21CT	AGAAGAGAGAGAGTACAGCCT	+	24561	24672	1	0	PDK_30s1162881	21	112	-63	3387	235	10.5	3077	64.5	gp2a	6596	773	773	0	gp2a	aaaatcaagaagacccatgggAGAAGAGAGAGAGTACAGCCTcagttctcagtgcagtcagagctggagggGCTGTACCCTCTCTCTTCTCCttttggtcatttttgatgga	7	ppt-MIR529f,ppt-MIR529e,bdi-MIR529,osa-MIR529a,osa-MIR529b,sbi-MIR529,zma-MIR529,	ppt-MIR529e	tcagcaatttactcactcatgctgggatcAGAAGAGAGAGAGTACAGCCCaagagcaaccgcttagttggaatgggctgtgctctctctcttctggttccaacctgagtgcatgtcggttgt	ppt-miR529e	AGAAGAGAGAGAGTACAGCCC	5'	6860	3387	3387	0	2613940	2613940	0	2613940	2613940	0	0	y	...((((((((((((...((((((((((((((.((((((((((((((((..........)))))))...))))))))).))))))))))))))...)))).))))))))...	2	0	0	-63	42	20
pda-miR529-3p_1ss20TC	bdi-miR529-3p_1ss20TC	GCTGTACCCTCTCTCTTCTCC	+	24561	24672	1	0	PDK_30s1162881	21	112	-63	43	2.5	0.5	36.5	3.5	gp2a	65	778	778	0	gp2a	aaaatcaagaagacccatgggAGAAGAGAGAGAGTACAGCCTcagttctcagtgcagtcagagctggagggGCTGTACCCTCTCTCTTCTCCttttggtcatttttgatgga	7	ppt-MIR529f,ppt-MIR529e,bdi-MIR529,osa-MIR529a,osa-MIR529b,sbi-MIR529,zma-MIR529,	bdi-MIR529	cgtcaaggttaaagggAGAAGAGAGAGAGTACAGCCTtaattaagctcgatcgatctgtcttgtatcaagGCTGTACCCTCTCTCTTCTTCtcttagcttcttgatg	bdi-miR529-3p	GCTGTACCCTCTCTCTTCTTC	3'	6860	43	42.5	0.5	32998	32623	375	32993	32623	370	0	y	...((((((((((((...((((((((((((((.((((((((((((((((..........)))))))...))))))))).))))))))))))))...)))).))))))))...	2	0	0	-63	42	20
pda-miR172b-5p_1ss3AG	gma-miR172b-5p_1ss3AG	GTGGCATCATCAAGATTCAC	+	25513	25663	1	0	PDK_30s1145531	20	151	-68.7	6	0	0	6	0	gp2a	5	756	756	0	gp2a	aacagtcactgtttgctggtGTGGCATCATCAAGATTCACaagctcttgcggataaagctccactcaattctgagggttttgatgctcggaagagaggttgaaagagagatgAGAATCTTGATGATGCTGCATcggcaataaatgactatt	132	gma-MIR172b,gma-MIR172f,gma-MIR172a,gma-MIR172h,gma-MIR172g,gma-MIR172j,gma-MIR172i,gma-MIR172d,gma-MIR172k,gma-MIR172c,gma-MIR172l,gma-MIR172e,aau-MIR172,lja-MIR172b,lja-MIR172c,lja-MIR172a,mtr-MIR172c,mtr-MIR172b,mtr-MIR172d,vun-MIR172,cca-MIR172,ath-MIR172a,ath-MIR172b,ath-MIR172c,ath-MIR172d,ath-MIR172e,bna-MIR172a,bna-MIR172d,bna-MIR172b,bna-MIR172c,bra-MIR172b,bra-MIR172a,aly-MIR172b,aly-MI…	gma-MIR172a	ttaacagtcgttatttgcggatGTAGCATCATCAAGATTCACatgcaagcgcaggtggtgggtgggacttgatgcaatctaagtgctgtgccagccaagccataggtcttttggaactgAGAATCTTGATGATGCTGCATcagccataaacgacttcac	gma-miR172b-5p	GTAGCATCATCAAGATTCAC	5'	111	6	6	0	4356	4356	0	4356	4356	0	0	y	...(((((....(((((((((..(((((((((((((((.((..(((((..(((......))).(((..(((((((..........)))))))..))).....)))))...)).)))))))))))))))..)))))))))....)))))...	4	0	0	-68.7	36	17
pda-miR172c-p3_1ss11TC	bna-MIR172c-p3_1ss11TC	AATGGGAATCCTGATGATGCTGCA	-	30038	30156	1	0	PDK_30s753791	24	119	-54.8	6	0	2	2	2	gp2a	6	909	909	0	gp2a	aacagtcggtgtttgcgggtGTAGCATCATCAAGATTCACatgggctgggcgatccgagatcgtgacatggtcccaAATGGGAATCCTGATGATGCTGCAtcagcaataagcgactata	22	gma-MIR172b,gma-MIR172f,gma-MIR172a,aau-MIR172,lja-MIR172b,mtr-MIR172c,mtr-MIR172b,vun-MIR172,bna-MIR172c,cpa-MIR172b,ssl-MIR172,lus-MIR172a,tcc-MIR172c,tcc-MIR172e,ppe-MIR172a,sly-MIR172b,nta-MIR172h,nta-MIR172e,nta-MIR172f,nta-MIR172i,nta-MIR172c,nta-MIR172d,	bna-MIR172c	cagccggtagttgcagatgcagcatcatcaagattcacaagtgaagtggtttccttggttttcgcctctccatccgaaaacaaagggttcttctcgaatgGGAATCTTGATGATGCTGCATcagcatatacatggcta	bna-MIR172c-p3	aatgGGAATCTTGATGATGCTGCA	3'	14	6	6	0	5454	5454	0	5454	5454	0	0	y	...(((((....((((.(((((((((((((((.(((((.(((((((((.((((((...))))))..)..)))))...))).))))).))))))))))))))).))))....)))))...	2	0	0	-54.8	44	18
pda-miR7692-p3_1ss14AC	osa-MIR7692-p3_1ss14AC	AAGGACTATATTACCCC	-	49657	49744	1	0	gi|300388125|ref|NC_013991.2|	17	88	-19.9	16	1	2	11	2	gp2a	4	644	644	0	gp2a	aacgtatcttgatgcctgaaagttggataggctggcccttacgtAAGGACTATATTACCCCaaatttttatgaaatacaagatgctca	1	osa-MIR7692,	osa-MIR7692	cgtccaaacaagtcctccaaattaattatttgggttaatatagttcttgGATCCAAAAAAGTGCCACGTGAGCatgccaagtcatcctcacatgcagcggtatgaatgaaatgaccattctacccttatataccacctagaaaagaaagaaaaaaaagaagataaatgttttcacacgtgtatgttcgttttagaattgtcacttacgattgttgctggcctgttatttttttctgtttgtgttttttctttcttttttatatggtatataaaggtagaatggtcatttcattcataccgctacatgcgaggaTGACTTGGCATGCTTACGTGGCACtttttgtgggtctaaggactatattaacccaaatgattaatttggatgacttgtttggtcg	osa-MIR7692-p3	aaggactatattaaccc	3'	16	16	16	0	10726	10726	0	10726	10726	0	0	y	...((((((((((...((((((((((.(((..(((.((((....)))).)))..)))..)).))))))))....)).))))))))...	4	1	1	-19.9	30	12
pda-miR529e_1ss21CT	ppt-miR529e_1ss21CT	AGAAGAGAGAGAGTACAGCCT	-	3240	3350	1	0	PDK_30s916261	21	111	-64.9	3502	243.5	10.5	3182.5	65.5	gp2a	6596	773	773	0	gp2a	aatcatcaagacccatgggAGAAGAGAGAGAGTACAGCCTtcagctctcagtgcagtctgaggtggaggggGCTGTACCCTCTCTCTTCTCCtcttggtcatttgatggaa	9	ppt-MIR529e,ppt-MIR529f,ppt-MIR529d,bdi-MIR529,osa-MIR529a,osa-MIR529b,sbi-MIR529,zma-MIR529,far-MIR529,	ppt-MIR529f	tgcacaattttctcactcatgctgggatcAGAAGAGAGAGAGTACAGCCCaacggccgatgttcagttggaacgggctgtgctctctctcttcttgttccaacctgggtgcatttccgttct	ppt-miR529e	AGAAGAGAGAGAGTACAGCCC	5'	7112	3502	3381.5	120.5	2.69898e+06	2.61027e+06	88708	2695655	2.61027e+06	85386.5	0	y	..(((((((((((...((((((((((((((.((((((((..(.((.(((((......)))))))...)..)))))))).))))))))))))))...))))..)))))))..	2	0	0	-64.9	41	19
pda-miR529-3p_1ss20TC	bdi-miR529-3p_1ss20TC	GCTGTACCCTCTCTCTTCTCC	-	3240	3350	1	0	PDK_30s916261	21	111	-64.9	55.5	2.5	0.5	49	3.5	gp2a	65	778	778	0	gp2a	aatcatcaagacccatgggAGAAGAGAGAGAGTACAGCCTtcagctctcagtgcagtctgaggtggaggggGCTGTACCCTCTCTCTTCTCCtcttggtcatttgatggaa	9	ppt-MIR529e,ppt-MIR529f,ppt-MIR529d,bdi-MIR529,osa-MIR529a,osa-MIR529b,sbi-MIR529,zma-MIR529,far-MIR529,	bdi-MIR529	cgtcaaggttaaagggAGAAGAGAGAGAGTACAGCCTtaattaagctcgatcgatctgtcttgtatcaagGCTGTACCCTCTCTCTTCTTCtcttagcttcttgatg	bdi-miR529-3p	GCTGTACCCTCTCTCTTCTTC	3'	7112	55.5	42.5	13	42651.5	32623	10028.5	42156	32623	9533	0	y	..(((((((((((...((((((((((((((.((((((((..(.((.(((((......)))))))...)..)))))))).))))))))))))))...))))..)))))))..	2	0	0	-64.9	41	19
pda-miR172a_1ss1AG	gma-miR172a_1ss1AG	GGAATCTTGATGATGCTGCAT	-	7175	7353	1	1	PDK_30s758731	21	179	-70.2	23.5	1.5	0.5	20.5	1	gp2a	24	786	753	1	gp2a	accgctgctgcatgggataaatcggaacagtcggtgtttgcgggtGTAGCATCATCAAGATTCACatagccctgggcgattgcgagttggcaacatggtcccaaatgAGAATCTTGATGATGCTGCATcagcaataagcgactatactctggaatatgctactgcctttgggctgccat	123	gma-MIR172h,gma-MIR172g,gma-MIR172j,gma-MIR172b,gma-MIR172l,gma-MIR172i,gma-MIR172f,gma-MIR172a,gma-MIR172c,gma-MIR172d,gma-MIR172e,aau-MIR172,lja-MIR172c,lja-MIR172b,lja-MIR172a,mtr-MIR172c,mtr-MIR172d,mtr-MIR172b,vun-MIR172,cca-MIR172,ath-MIR172a,ath-MIR172b,ath-MIR172e,ath-MIR172c,ath-MIR172d,bna-MIR172a,bna-MIR172c,bna-MIR172b,bna-MIR172d,bra-MIR172a,bra-MIR172b,aly-MIR172a,aly-MIR172b,aly-MI…	gma-MIR172a	ttaacagtcgttatttgcggatGTAGCATCATCAAGATTCACatgcaagcgcaggtggtgggtgggacttgatgcaatctaagtgctgtgccagccaagccataggtcttttggaactgAGAATCTTGATGATGCTGCATcagccataaacgacttcac	gma-miR172a	AGAATCTTGATGATGCTGCAT	3'	56	23.5	0.5	23	17182.5	405	16777.5	16456.5	405	16051.5	0	y	...((.(((((((((.(((..(((((..(((((....((((.(((((((((((((((((((((.(((.....(((((.(((((......)))..)).).)))).))).))))))))))))))))))))).))))....)))))....)))))..))).))).))).....))).))...	2	0	0	-70.2	62	19
pda-miR167-3p_2ss10GT20CT	ahy-miR167-3p_2ss10GT20CT	AGATCATGTTGCAGTTTCATC	-	148363	148465	2	0	PDK_30s943301	21	103	-44	364.5	22.5	1	339	2	gp2a	565	781	781	0	gp2a	acgagcagcTGAAGCTGCCAGCATGATCTGAtctcttctttcctttcttccaaatcttggatgaatatgcacatcAGATCATGTTGCAGTTTCATCtgctgat	146	ppt-MIR167,gma-MIR167g,gma-MIR167b,gma-MIR167c,gma-MIR167e,gma-MIR167f,gma-MIR167a,gma-MIR167d,gso-MIR167a,ahy-MIR167,lja-MIR167,lja-MIR167c,lja-MIR167a,lja-MIR167b,mtr-MIR167b,mtr-MIR167a,cca-MIR167,ath-MIR167b,ath-MIR167d,ath-MIR167a,ath-MIR167c,bna-MIR167a,bna-MIR167c,bna-MIR167d,bna-MIR167b,aly-MIR167b,aly-MIR167d,aly-MIR167a,aly-MIR167c,cpa-MIR167d,cpa-MIR167c,cpa-MIR167a,cme-MIR167f,cme-MIR…	ahy-MIR167	gatcatgcaccactacaagtTGAAGCTGCCAGCATGATCTTaactttccctctcctatgatttgttggggtgagatcAGATCATGTGGCAGTTTCACCtagttgttggaagcatgaat	ahy-miR167-3p	AGATCATGTGGCAGTTTCACC	3'	18615	364.5	363	1.5	278853	277762	1091.5	278797	277762	1035.5	0	y	...(((((.((((((((.((((((((((((((............(((.(((((...))))).))).......)))))))))))))))))))))).)))))...	1	1	1	-44	27	21
pda-miR169h-3p_1ss18TG	aly-miR169h-3p_1ss18TG	GGCAGTCTCCTTGGCTAGT	+	6712	6883	1	0	PDK_30s695351	19	172	-80.4	7	0.5	0	6.5	0	gp2a	5	681	681	0	gp2a	agaggtcttgcatggagataggagtgtctttggTAGCCAAGGATGACTTGCCGAtgtcctctgggaggattccaatggttggagccatctctattgctcaaaacctcccctggtttcattGGCAGTCTCCTTGGCTAGTataagtggctcttatttcccatgctagtcctac	249	pde-MIR169,gma-MIR169b,gma-MIR169p,gma-MIR169c,gma-MIR169g,gma-MIR169v,gma-MIR169d,gma-MIR169s,gma-MIR169h,gma-MIR169f,gma-MIR169u,gma-MIR169a,gma-MIR169m,gma-MIR169e,mtr-MIR169a,mtr-MIR169f,mtr-MIR169d,mtr-MIR169g,mtr-MIR169e,mtr-MIR169b,mtr-MIR169l,vun-MIR169,cca-MIR169a,cca-MIR169b,ath-MIR169d,ath-MIR169e,ath-MIR169a,ath-MIR169f,ath-MIR169j,ath-MIR169h,ath-MIR169b,ath-MIR169m,ath-MIR169i,ath-M…	aly-MIR169h	tagaaaatcatataagagaaaatggtgacatgaagaatgagaacttgtgtggTAGCCAAGGATGACTTGCCTGcgttttaacaatacaatatcaaagactactcgatcgatcgatagtcttagagttggttagtcgtcaGGCAGTCTCCTTGGCTATTcaaacaattcttgttctcctcatttcacatctctctttcgttttttg	aly-miR169h-3p	GGCAGTCTCCTTGGCTATT	3'	79	7	7	0	4677	4677	0	4677	4677	0	0	y	..(((.((.((((((((((((((((..(((...((((((((((.((((.(((((((.((...((((((....((((((..(((....))))))))).......))))))..))...)))))))))))))))))))))....)))..)))))))))))).)))).)).)))..	1	1	2	-80.4	62	19
pda-miR169b_1ss1CT	gma-miR169b_1ss1CT	TAGCCAAGGATGACTTGCCGA	+	6712	6883	1	0	PDK_30s695351	21	172	-80.4	51	3	0	48	0	gp2a	23	791	791	0	gp2a	agaggtcttgcatggagataggagtgtctttggTAGCCAAGGATGACTTGCCGAtgtcctctgggaggattccaatggttggagccatctctattgctcaaaacctcccctggtttcattGGCAGTCTCCTTGGCTAGTataagtggctcttatttcccatgctagtcctac	249	pde-MIR169,gma-MIR169b,gma-MIR169p,gma-MIR169c,gma-MIR169g,gma-MIR169v,gma-MIR169d,gma-MIR169s,gma-MIR169h,gma-MIR169f,gma-MIR169u,gma-MIR169a,gma-MIR169m,gma-MIR169e,mtr-MIR169a,mtr-MIR169f,mtr-MIR169d,mtr-MIR169g,mtr-MIR169e,mtr-MIR169b,mtr-MIR169l,vun-MIR169,cca-MIR169a,cca-MIR169b,ath-MIR169d,ath-MIR169e,ath-MIR169a,ath-MIR169f,ath-MIR169j,ath-MIR169h,ath-MIR169b,ath-MIR169m,ath-MIR169i,ath-M…	gma-MIR169b	tatgatgctgCAGCCAAGGATGACTTGCCGAtaaattctttctctaatttgactttcaattcatgtttgtcaattgatagtgcattagttctaatatatgcatttgattatatagaacactattgtgaaagtgtctttagggatagggtaaattcggcaagtcatctttggctacatgtctat	gma-miR169b	CAGCCAAGGATGACTTGCCGA	5'	79	51	51	0	36476	36476	0	36476	36476	0	0	y	..(((.((.((((((((((((((((..(((...((((((((((.((((.(((((((.((...((((((....((((((..(((....))))))))).......))))))..))...)))))))))))))))))))))....)))..)))))))))))).)))).)).)))..	1	1	2	-80.4	62	19
pda-miR529e_1ss21CA	ppt-miR529e_1ss21CA	AGAAGAGAGAGAGTACAGCCA	-	1738	1849	1	1	PDK_30s912631	21	112	-58.2	33.5	1.5	1	30	1	gp2a	44	774	735	1	gp2a	agatcatcaaggccaatgggAGAAGAGAGAGAGTACAGCTAgctcattctcatggtagagggatgataagaGCTGTACCCTCTCTCTTCTTCtcttgggctattgatgaagg	8	ppt-MIR529f,ppt-MIR529e,ath-MIR156j,bdi-MIR529,osa-MIR529b,osa-MIR529a,sbi-MIR529,zma-MIR529,	ppt-MIR529e	tcagcaatttactcactcatgctgggatcAGAAGAGAGAGAGTACAGCCCaagagcaaccgcttagttggaatgggctgtgctctctctcttctggttccaacctgagtgcatgtcggttgt	ppt-miR529e	AGAAGAGAGAGAGTACAGCCC	5'	81	33.5	8.5	25	25741	6481	19260	24763	6481	18282	0	y	...((((((((.((((..(((((((((((((.((((((((...((((((((......)).))))))....)))))))).)))))))))))))..)))).))..))))))...	2	0	0	-58.2	41	19
pda-miR529e_1ss21CG	ppt-miR529e_1ss21CG	AGAAGAGAGAGAGTACAGCCG	-	63557	63665	1	1	PDK_30s1064561	21	109	-49.4	156	10	0	143	3	gp2a	109	766	728	1	gp2a	agatcatcaaggtcaatgggAGAAGAGAGAGAGTACAGCCTcactctcatgatagtggggtgatggagagctgcaccctctctcttcttctctttgcttttgatgaagg	8	ppt-MIR529f,ppt-MIR529e,ppt-MIR529d,bdi-MIR529,osa-MIR529a,osa-MIR529b,sbi-MIR529,zma-MIR529,	ppt-MIR529e	tcagcaatttactcactcatgctgggatcAGAAGAGAGAGAGTACAGCCCaagagcaaccgcttagttggaatgggctgtgctctctctcttctggttccaacctgagtgcatgtcggttgt	ppt-miR529e	AGAAGAGAGAGAGTACAGCCC	5'	308	156	7.5	148.5	115810	5542.5	110267	111334	5542.5	105791	0	y	...((((((((..(((.((((((((((((((.((.(((((((..((((((....)))))).....))).)))).)).))))))))))))))..)))..))))))))...	2	1	1	-49.4	40	19
pda-miR172a-p5_1ss8CG	aly-MIR172a-p5_1ss8CG	TTTGCTGGTGTGGCATCATC	+	24278	24380	1	0	PDK_30s661361	20	103	-57	1.5	0	0	1.5	0	gp2a	3	728	728	0	gp2a	atcagtcgctgTTTGCTGGTGTGGCATCATCaagattcacaagctcttgtttgtgagagaggtgGGAATCTTGATGATGCTGCATcggcaataaacgactatt	131	gma-MIR172i,gma-MIR172l,gma-MIR172b,gma-MIR172f,gma-MIR172k,gma-MIR172a,gma-MIR172h,gma-MIR172g,gma-MIR172j,gma-MIR172d,gma-MIR172c,gma-MIR172e,aau-MIR172,lja-MIR172b,lja-MIR172a,lja-MIR172c,mtr-MIR172c,mtr-MIR172b,mtr-MIR172d,vun-MIR172,cca-MIR172,ath-MIR172a,ath-MIR172e,ath-MIR172c,ath-MIR172b,ath-MIR172d,bna-MIR172b,bna-MIR172c,bna-MIR172d,bna-MIR172a,bra-MIR172b,bra-MIR172a,aly-MIR172e,aly-MI…	aly-MIR172a	ggagccacggtcgctgtttgctgctGTGGCATCATCAAGATTCACAtctgttgatggacggtggtgattcgctctccccaaagttctctatgaaaatgAGAATCTTGATGATGCTGCATcggcaatcaacggctattctttttctctcc	aly-MIR172a-p5	tttgctgctGTGGCATCATC	5'	82	1.5	1.5	0	1092	1092	0	1092	1092	0	0	y	...(((((....(((((((((..(((((((((((((((.((..(((((......)))))...)).)))))))))))))))..)))))))))....)))))...	4	0	0	-57	36	17
pda-miR1310-p3_1ss20TC	han-MIR1310-p3_1ss20TC	CTTTAAATAGGTAGGACGGCGCGGCTGCT	-	772	856	1	0	M01000038355	29	85	-34.8	73201	8694	30385	9204	24918	gp1b	2843	1086	1086	0	gp1b	attaggaggcagtcgggggcgcaaCGCCCTCGACCTATTCTCAAACTTTAAATAGGTAGGACGGCGCGGCTGCTccgttgagccg	4	pta-MIR1310,pde-MIR1310,cln-MIR1310,han-MIR1310,	han-MIR1310	AGGCATCGGGGGCGCAACGCCCtcgacctattctcaaactttaaataggtaggacggtgcggctgctttgttgagccgc	han-MIR1310-p3	ctttaaataggtaggacggtgcggctgct	3'	109728	73201	70354	2847	71651978	69091728	2560250	71562736	69091728	2471008	0	n	.....((((..((((((((((...))))))))))....))))............(((..(((((.((....)).)))))..))).	6	2	1	-34.8	14	26
pda-miR528-p3_1ss15TC	osa-MIR528-p3_1ss15TC	CCTGTGCTTGCCTCCTCCA	-	15898	16051	1	0	PDK_30s1156261	19	154	-79.3	9	0	0.5	8.5	0	gp2a	18	708	708	0	gp2a	attgggaggtagcagtagcagTGGAAGGGGCATGCAGAGGAGaggccaagaaggagagaaggagagaaggaaagaaagattctcatctcagtgcttcttctggaggcaaattCCTGTGCTTGCCTCCTCCActcctgctgcttccactccccca	6	bdi-MIR528,ssp-MIR528,osa-MIR528,sbi-MIR528,zma-MIR528b,zma-MIR528a,	osa-MIR528	agTGGAAGGGGCATGCAGAGGAGcaggagattcagtttgaagctggacttcacttttgcctctctctCCTGTGCTTGCCTCTTCCATT	osa-MIR528-p3	CCTGTGCTTGCCTCTTCCA	3'	459	9	9	0	6372	6372	0	6372	6372	0	0	y	...(((((..((((((((.((((((.((((((.(((.(((((..(((.((((((((.....((((..((((........))))..))))....))))))))...)))...))))).))).)))))).)))))).))))))))....)))))...	2	0	0	-79.3	52	18
pda-miR396_2ss2TC21TG	pta-miR396_2ss2TC21TG	TCCCACAGCTTTCTTGAACTG	-	1146	1267	2	1	PDK_30s1195041	21	122	-57.1	25	3	3.5	17.5	1	gp2a	17	768	730	1	gp2a	cactggtctctctctgtaattTCCCACAGCTTTATTGAACTGcagttaagattcccaccatggaagtatagttgatggcagcagttcaagaaagctgtggaagaatacagagagggccatca	97	pta-MIR396,pde-MIR396,pab-MIR396a,gma-MIR396i,gma-MIR396e,gma-MIR396a,gma-MIR396h,gma-MIR396c,gma-MIR396g,gma-MIR396b,gma-MIR396f,gma-MIR396d,gma-MIR396k,aau-MIR396,amg-MIR396,lja-MIR396,mtr-MIR396b,mtr-MIR396a,cca-MIR396b,cca-MIR396a,cca-MIR396c,ath-MIR396a,ath-MIR396b,bna-MIR396a,aly-MIR396a,aly-MIR396b,cpa-MIR396,cme-MIR396b,cme-MIR396c,cme-MIR396a,cme-MIR396d,hbr-MIR396b,mes-MIR396a,mes-MIR39…	pta-MIR396	gaatcttgtcatacttTTCCACAGCTTTCTTGAACTTtacgtgtacgggacgaggagattctgatttctacgtctgcgattaaagttcaagaaaactgtgggaaagcatggtaggattc	pta-miR396	TTCCACAGCTTTCTTGAACTT	5'	40	25	11.5	13.5	16359	6425	9934	15846	6425	9421	0	y	...(((((.(((((((((.(((.((((((((((.(((((((((........((((......)))).....((.....)).))))))))).)))))))))).))).))))))))))))))...	2	0	0	-57.1	36	19
pda-miR167-3p_2ss8GC20CT	ahy-miR167-3p_2ss8GC20CT	AGATCATCTGGCAGTTTCATC	-	21735	21889	2	0	PDK_30s65509419	21	155	-53.3	94	6.5	2	85	0.5	gp2a	139	779	779	0	gp2a	catggcttctcttggtgcaccacaagttgcTGAAGCTGCCAGCATGATCTgatctctcctctatccttgtgatcttgatttttttttttccaaaagaagcccatcAGATCATCTGGCAGTTTCATCtactgatgggagcacaaagaaaaccctaa	142	gma-MIR167b,gma-MIR167c,gma-MIR167e,gma-MIR167f,gma-MIR167a,gma-MIR167d,gma-MIR167g,gso-MIR167a,ahy-MIR167,lja-MIR167c,lja-MIR167a,lja-MIR167b,lja-MIR167,mtr-MIR167b,mtr-MIR167a,cca-MIR167,ath-MIR167b,ath-MIR167d,ath-MIR167a,bna-MIR167a,bna-MIR167c,bna-MIR167d,bna-MIR167b,aly-MIR167b,aly-MIR167d,aly-MIR167a,cpa-MIR167c,cpa-MIR167a,cpa-MIR167d,cme-MIR167f,cme-MIR167b,cme-MIR167d,cme-MIR167a,cme-MI…	ahy-MIR167	gatcatgcaccactacaagtTGAAGCTGCCAGCATGATCTTaactttccctctcctatgatttgttggggtgagatcAGATCATGTGGCAGTTTCACCtagttgttggaagcatgaat	ahy-miR167-3p	AGATCATGTGGCAGTTTCACC	3'	951	94	90.5	3.5	72036	69355	2681	71935.5	69355	2580.5	0	y	...((.((.((((.((((.(((..(((...((((((((((((.((((((((((.........(((.....)))......((((((((....))))))))...))))))))))))))))))))))...)))..)))..)))).)))).)).))...	1	1	1	-53.3	40	19
pda-miR169b-p5_1ss15TC	ghr-MIR169b-p5_1ss15TC	CAGCCAAGGATGATCTGCCGG	+	16974	17118	1	0	PDK_30s724681	21	145	-76.4	8.5	2	0.5	6	0	gp2a	5	766	766	0	gp2a	ccaggccttacatgaagaagcagagagtggagtgCAGCCAAGGATGATCTGCCGGcatcaacttaagagaaaattcctctactgcagactgtcggcaggttgtccttggctacattttgccctcgtcttctcatgcaaggctcgt	6	ghr-MIR169b,mdm-MIR169b,bdi-MIR169k,osa-MIR169r,sbi-MIR169o,tae-MIR169,	ghr-MIR169b	taaagtagtgCAGCCAAGGATGATTTGCCGGctaggctttctcttccacttatctgagttgttttttgatactcgttaattactcaaaactatttatgttaatggtttgaactgttcatgggaacgggaagttaattatttaatacataaatgaatcaaacctttgttggaggagataatcggcaagttgtctttggctacgtttctttc	ghr-MIR169b-p5	CAGCCAAGGATGATTTGCCGG	5'	9	8.5	8.5	0	5982	5982	0	5982	5982	0	0	y	...((((((.((((.(((((..(((.(..(((((.(((((((((..(((((((((((((......((((.......))))......)).)))))))))))..))))))))).)))))..).)))..))))))))).))))))...	4	0	0	-76.4	50	18
pda-miR535a-p3_1ss12AT	vvi-MIR535a-p3_1ss12AT	TGACTGTGTACTGGCGTGCT	+	3664	3765	1	1	PDK_30s939421	20	102	-53.5	2	0	1	1	0	gp2a	1	761	724	1	gp2a	cctggctttggtTGACAACGAGAGAGAGCacgctggtcggcaatcatgcttggggccaTGAGTGTGTACTGGCGTGCTccttctcgttgtcactcagcttca	20	pab-MIR535,ppt-MIR535c,ppt-MIR535d,ppt-MIR535a,ppt-MIR535b,cpa-MIR535,mes-MIR535b,mes-MIR535a,rco-MIR535,tcc-MIR535,aqc-MIR535,mdm-MIR535b,mdm-MIR535c,mdm-MIR535a,mdm-MIR535d,ppe-MIR535b,ppe-MIR535a,vvi-MIR535a,vvi-MIR535c,osa-MIR535,	vvi-MIR535a	tgtaattgctTGACAACGAGAGAGAGCACGCtagtcagcattcatgcgaggaacatgactgtgtacaggcgtgctctctctcgctgtcatacaatcttctc	vvi-MIR535a-p3	tgactgtgtacaggcgtgct	3'	835	2	0	2	1480	0	1480	1408	0	1408	0	y	...((((..((.(((((((((((..((((((((..((..(((.((((((.....).))))).)))..))..))))))))..))))))))))))).))))...	4	0	0	-53.5	36	15
pda-miR171j-5p_2ss2AG9TC	gma-miR171j-5p_2ss2AG9TC	TGTTGGCCCGGTTCACTCAGA	-	8274	8396	2	0	PDK_30s886631	21	123	-53	1	0	0	1	0	gp2a	1	762	762	0	gp2a	cgaatgaaatagttactatgaTGTTGGCCCGGTTCACTCAGAaaacgctcctagggcaacacgaaggctttagaccctgcgttcTGATTGAGCCGTGCCAATATCttagtactctttcatcct	141	pde-MIR171,smo-MIR171a,smo-MIR171b,gma-MIR171u,gma-MIR171c,gma-MIR171g,gma-MIR171o,gma-MIR171e,gma-MIR171j,gma-MIR171f,gma-MIR171q,gma-MIR171a,gma-MIR171i,lja-MIR171a,mtr-MIR171d,mtr-MIR171f,mtr-MIR171c,htu-MIR171a,hpa-MIR171a,ath-MIR171c,ath-MIR171b,ath-MIR170,ath-MIR171a,bna-MIR171e,bna-MIR171d,bna-MIR171b,bna-MIR171c,bna-MIR171a,bna-MIR171f,bna-MIR171g,bra-MIR171a,aly-MIR171c,aly-MIR171b,aly-M…	gma-MIR171j	atgaagtagttattgtgaTATTGGCCTGGTTCACTCAGAcatgtataccacggcacggttgtgtccttgctagaaagatttaaaacaaaatacatgttgtgattgtggttttgggttTGATTGAGCCGTGCCAATATCtcagtgctatttcat	gma-miR171j-5p	TATTGGCCTGGTTCACTCAGA	5'	1441	1	1	0	762	762	0	762	762	0	0	y	...((((((.((.(((((.(((((((((.(((((((.(((((..((((..(((..((.........))..))).....))))))))).))))))).))))))))).))))))).))))))...	2	0	0	-53	43	19
pda-miR172b-5p_1ss3AG	gma-miR172b-5p_1ss3AG	GTGGCATCATCAAGATTCAC	+	7172	7272	1	0	PDK_30s1019081	20	101	-48.1	5	0	0	5	0	gp2a	5	756	756	0	gp2a	cgatgtttgcaggtGTGGCATCATCAAGATTCACattggtctgagcagccgcagtctgatccttaatgAGAATCTTGATGATGCTGCATcagcaaataagc	132	gma-MIR172b,gma-MIR172f,gma-MIR172a,gma-MIR172h,gma-MIR172g,gma-MIR172j,gma-MIR172i,gma-MIR172d,gma-MIR172k,gma-MIR172c,gma-MIR172l,gma-MIR172e,aau-MIR172,lja-MIR172b,lja-MIR172c,lja-MIR172a,mtr-MIR172c,mtr-MIR172b,mtr-MIR172d,vun-MIR172,cca-MIR172,ath-MIR172a,ath-MIR172b,ath-MIR172c,ath-MIR172d,ath-MIR172e,bna-MIR172a,bna-MIR172d,bna-MIR172b,bna-MIR172c,bra-MIR172b,bra-MIR172a,aly-MIR172b,aly-MI…	gma-MIR172a	ttaacagtcgttatttgcggatGTAGCATCATCAAGATTCACatgcaagcgcaggtggtgggtgggacttgatgcaatctaagtgctgtgccagccaagccataggtcttttggaactgAGAATCTTGATGATGCTGCATcagccataaacgacttcac	gma-miR172b-5p	GTAGCATCATCAAGATTCAC	5'	104	5	5	0	3669	3669	0	3669	3669	0	0	y	...(((((((.((((..(((((((((((((((.((((((((.((((....))..)).))))...)))).)))))))))))))))..)))).)))))))...	4	0	0	-48.1	38	17
pda-miR1424-p3_1ss15TC	osa-MIR1424-p3_1ss15TC	CTGAACAACAAGATCATA	-	2610	2685	1	0	M01000043814	18	76	-18.1	1	0	0	1	0	gp2a	1	653	653	0	gp2a	cggttcaagataagttcactgatttgttggaaagaatatataCTGAACAACAAGATCATAgagaaatcttgagatt	1	osa-MIR1424,	osa-MIR1424	ccagctagtttagctcccaggccagtcaaggtagaggcagctcaaagtgtagtcatctcttgatcgttgattgctccagtcctatcccatgctcctccttgagctcccaatcattgagctctcggatcctctctgctcttctctgatctggtgtcgttccagtttccaaacatgttgcagaatgaagaacactgaacaacaagattataaggtaggtaagtagttgatcatttcaggtttccagagatgataaagcaatcagggatgcATGCACACTGATGCTGATTGTacaaactccaa	osa-MIR1424-p3	ctgaacaacaagattata	3'	2	1	1	0	617	617	0	617	617	0	0	y	...((((((((...(((..((((((((((...((........))...)))).))))))..)))..))))))))...	6	1	1	-18.1	23	12
pda-miR162_1ss20AG	pde-miR162_1ss20AG	TCGATAAACCTCTGCATCCGG	-	20309	20452	1	0	PDK_30s843751	21	144	-55.6	5075	823	494	3266	492	gp2a	4550	782	782	0	gp2a	ctggacgcagcggtttatcgatctcttcctggccttgtgtgtgtcggtggtctggtgggtggattgtcacgtcaagaaagaaagaaaaggaacgagtcgagggtgcaaagcgggaagcggTCGATAAACCTCTGCATCCGGctc	39	pde-MIR162,gma-MIR162a,gma-MIR162c,gma-MIR162b,aau-MIR162,mtr-MIR162,vun-MIR162,htu-MIR162a,hpe-MIR162a,ath-MIR162a,ath-MIR162b,bna-MIR162a,aly-MIR162a,aly-MIR162b,cpa-MIR162a,cme-MIR162,mes-MIR162,rco-MIR162,lus-MIR162a,lus-MIR162b,ghr-MIR162a,tcc-MIR162,mdm-MIR162b,mdm-MIR162a,ppe-MIR162,csi-MIR162,ptc-MIR162a,ptc-MIR162b,sly-MIR162,nta-MIR162a,nta-MIR162b,stu-MIR162a,stu-MIR162b,vvi-MIR162,bdi…	pde-MIR162	gcgatttcagacgcttggcagcctggatgcaaagggtttaccgaccatgtccacgggccgctgggtctcggTCGATAAACCTCTGCATCCAGattgtttggaatctgttgc	pde-miR162	TCGATAAACCTCTGCATCCAG	3'	5075	5075	4858	217	3945799	3776963	168836	3939344	3776963	162381	0	y	(((((.((((.((((((((((((.(((((((.(((((..(((..(.....(((..(((((((....)))).)))....))).......)..)))...)))))........))))))).)))))))))))).)))).)))))...	2	0	0	-55.6	47	19
pda-miR164a-3p_1ss6AG	aly-miR164a-3p_1ss6AG	CACGTGCTCCCCTTCTCCAAC	+	7338	7452	1	0	PDK_30s740201	21	115	-58.6	9	0.5	2.5	4.5	1.5	gp2a	13	806	806	0	gp2a	cttggtgaggaggcccttgtTGGAGAAGCAGGGCACGtgcaaagccttccccttctctacctctctagcaatctttgCACGTGCTCCCCTTCTCCAACatgaccttctcacctcc	101	cln-MIR164,gma-MIR164e,gma-MIR164g,gma-MIR164d,gma-MIR164a,gma-MIR164b,gma-MIR164k,gma-MIR164j,gma-MIR164f,gma-MIR164h,gma-MIR164c,gma-MIR164i,mtr-MIR164a,mtr-MIR164c,mtr-MIR164b,mtr-MIR164d,hci-MIR164a,ath-MIR164a,ath-MIR164b,ath-MIR164c,bna-MIR164d,bna-MIR164a,bna-MIR164c,bna-MIR164b,bra-MIR164a,aly-MIR164b,aly-MIR164c,aly-MIR164a,cpa-MIR164c,cpa-MIR164a,cpa-MIR164b,cme-MIR164c,cme-MIR164a,cme-…	aly-MIR164a	gtTGGAGAAGCAGGGCACGTGCAaaccaacaaacacgaaatccgtctcatgtgttttgCACGTACTCCCCTTCTCCAAC	aly-miR164a-3p	CACGTACTCCCCTTCTCCAAC	3'	39	9	7.5	1.5	7157.5	5947	1210.5	7106.5	5947	1159.5	0	y	...((((((((((....(((((((((((..((((((((((((((............................))))))))))))))..)))))))))))...))))))))))...	4	0	0	-58.6	35	15
pda-miR164a-3p_1ss6AG	aly-miR164a-3p_1ss6AG	CACGTGCTCCCCTTCTCCAAC	+	534	665	1	0	PDK_30s747091	21	132	-63.6	9	0.5	2.5	4.5	1.5	gp2a	13	806	806	0	gp2a	cttggtgatcttttggtgaggaggtccttgcTGGAGAAGCAGGGCACGtgcaaagccttcgccctctctatctctctagctatctttgCACGTGCTCCCCTTCTCCAACatggccttctcacctccacctcc	90	cln-MIR164,gma-MIR164g,gma-MIR164d,gma-MIR164a,gma-MIR164e,gma-MIR164b,gma-MIR164k,gma-MIR164i,gma-MIR164j,gma-MIR164f,gma-MIR164h,gma-MIR164c,mtr-MIR164a,mtr-MIR164c,mtr-MIR164b,hci-MIR164a,ath-MIR164b,ath-MIR164a,ath-MIR164c,bna-MIR164d,bna-MIR164c,bna-MIR164a,bna-MIR164b,bra-MIR164a,aly-MIR164c,aly-MIR164b,aly-MIR164a,cpa-MIR164c,cpa-MIR164a,cpa-MIR164b,cme-MIR164c,cme-MIR164a,cme-MIR164d,mes-…	aly-MIR164a	gtTGGAGAAGCAGGGCACGTGCAaaccaacaaacacgaaatccgtctcatgtgttttgCACGTACTCCCCTTCTCCAAC	aly-miR164a-3p	CACGTACTCCCCTTCTCCAAC	3'	31	9	7.5	1.5	7157.5	5947	1210.5	7106.5	5947	1159.5	0	y	...((((.......((((((((((((..((.((((((((..((((((((((((((.....((................))...))))))))))))))..)))))))).)).))))))))))))..))))...	4	0	0	-63.6	42	15
pda-miR827_2ss15AG21TG	ath-miR827_2ss15AG21TG	TTAGATGACCATCAGCAAACG	+	10223	10334	2	0	PDK_30s920241	21	112	-55.5	134	0.5	4.5	120	9	gp2a	81	774	774	0	gp2a	ctttgaatgtgttttgctgatggtcatctaatcatcttcaaatcttctcttcccctctttaatttgaagcgtgaagacatggTTAGATGACCATCAGCAAACGcattcacaa	6	ath-MIR827,aly-MIR827,bdi-MIR827,ssp-MIR827,osa-MIR827,zma-MIR827,	ath-MIR827	ttccatgaaacgttataggtttttttctttctctcttgcaacccttgaatgtgtttgttgattgatatctacacatgttgatcatccttgtgttgatcgattggtTTAGATGACCATCAACAAACTctttcgtggttttgcatcgcttcttggaatctcgatcatgtttttagcatc	ath-miR827	TTAGATGACCATCAACAAACT	3'	170	134	121.5	12.5	101358	91770.5	9587.5	100936	91770.5	9165.5	0	y	...((((((((.((((((((((((((((((((((((((((...((((..................))))..))))))..))))))))))))))))))))))))))))))...	1	1	1	-55.5	40	21
pda-miR166a-5p_1ss15CT	gma-miR166a-5p_1ss15CT	GGAATGTTGTCTGGTTCGAGG	+	9	124	1	1	PDK_30s771801	21	116	-41.8	239	19.5	5.5	208	6	gp2a	389	774	737	1	gp2a	cttttgaggGGAATGTTGTCTGGCTCGAGGtctatctccctgcagatcttttctttccctcccttcatgtctcccagtgaaagaaatcTCGGACCAGGCTTCATTCCCcccaagcg	241	pta-MIR166b,pta-MIR166a,pde-MIR166b,pde-MIR166a,pab-MIR166a,pab-MIR166b,ppt-MIR166j,ppt-MIR166d,ppt-MIR166c,ppt-MIR166g,ppt-MIR166l,ppt-MIR166k,ppt-MIR166f,ppt-MIR166h,ppt-MIR166a,ppt-MIR166e,ppt-MIR166i,ppt-MIR166b,ppt-MIR166m,smo-MIR166b,smo-MIR166a,smo-MIR166c,gma-MIR166t,gma-MIR166b,gma-MIR166a,gma-MIR166d,gma-MIR166c,gma-MIR166r,gma-MIR166g,gma-MIR166e,gma-MIR166i,gma-MIR166p,gma-MIR166u,gma…	gma-MIR166l	tttccttgcaaaggtgaggttgagaGGAATGTTGTCTGGCTCGAGGtcatggaggaggagagtactcagatgagtgaaagtttccaatggaaatttaccctcttaacaccaaaaaaaaaaaaaaaattgattctgggaccaggcttcatttcccccatccaacttttgttttttattcc	gma-miR166a-5p	GGAATGTTGTCTGGCTCGAGG	5'	8408	239	37	202	181670	25672.5	155998	174276	25672.5	148604	0	y	..((((.((((((((..((((((..((((....((((......))))..((((((((.((...............)).)))))))).))))..))))))..)))))))).))))..	4	0	0	-41.8	22	16
pda-miR156c_1ss13AG	gma-miR156c_1ss13AG	TTGACAGAAGATGGAGAGCAC	-	5366	5485	1	1	PDK_30s737121	21	120	-58.2	13	1.5	0	10.5	1	gp2a	17	748	725	1	gp2a	gaaaggagccatccggtgatgctgTTGACAGAAGATAGAGAGCACagatgatggcatgcgcactttgcatctcactcctttgtgCTCTCTATGCTTCTGTCATCAccttcggccccttgc	30	gma-MIR156m,gma-MIR156e,gma-MIR156l,gma-MIR156i,gma-MIR156d,mtr-MIR156g,cpa-MIR156e,cpa-MIR156f,cme-MIR156e,hbr-MIR156,mes-MIR156h,mes-MIR156j,rco-MIR156h,rco-MIR156g,lus-MIR156e,aqc-MIR156b,bcy-MIR156,mdm-MIR156ab,mdm-MIR156ac,ppe-MIR156g,ptc-MIR156h,ptc-MIR156g,ptc-MIR156l,ptc-MIR156i,sly-MIR156c,sly-MIR156b,stu-MIR156c,vvi-MIR156f,vvi-MIR156i,vvi-MIR156g,	gma-MIR156d	ctacttggtaattaaggttgTTGACAGAAGATAGAGAGCACagatgatgatatgcatattatataatatatagcagggaactcatgatgaattgtgcatcttactcctttgtgctctctatacttctgtcatcaccttcagcctccatttc	gma-miR156c	TTGACAGAAGATAGAGAGCAC	5'	33	13	0	13	9956	0	9956	9673.5	0	9673.5	0	y	..((((.(((....(((((......(((((((((((((((((((((((.((((..(((((.....)))))..)).)).)))))))))))))).))))))))))))))...))).))))..	1	1	1	-58.2	44	20
pda-miR396_2ss2TC21TG	pta-miR396_2ss2TC21TG	TCCCACAGCTTTCTTGAACTG	-	46595	46739	2	1	PDK_30s756541	21	145	-56.4	15	2	0.5	11.5	1	gp2a	17	768	730	1	gp2a	gaacttcttcttcattggtctcgctctgtaattTCCCACAGCTTTATTGAACTGcaactcaaagcacctagcatacaaggatggatgcaGTTCAAGAAAGCTGTGGAAGactacaaagagggccagagagagagagagggagaga	97	pta-MIR396,pde-MIR396,pab-MIR396a,gma-MIR396i,gma-MIR396e,gma-MIR396a,gma-MIR396h,gma-MIR396c,gma-MIR396g,gma-MIR396b,gma-MIR396f,gma-MIR396d,gma-MIR396k,aau-MIR396,amg-MIR396,lja-MIR396,mtr-MIR396b,mtr-MIR396a,cca-MIR396b,cca-MIR396a,cca-MIR396c,ath-MIR396a,ath-MIR396b,bna-MIR396a,aly-MIR396a,aly-MIR396b,cpa-MIR396,cme-MIR396b,cme-MIR396c,cme-MIR396a,cme-MIR396d,hbr-MIR396b,mes-MIR396a,mes-MIR39…	pta-MIR396	gaatcttgtcatacttTTCCACAGCTTTCTTGAACTTtacgtgtacgggacgaggagattctgatttctacgtctgcgattaaagttcaagaaaactgtgggaaagcatggtaggattc	pta-miR396	TTCCACAGCTTTCTTGAACTT	5'	31	15	1.5	13.5	11119	1185	9934	10606	1185	9421	0	y	...(((((((((..((..(((.((((((((.(((.((((((((((.((((((((((.(.((.....(((........))).))).)))))))))).)))))))))).))).))))....)))).)))..))..)))))))))...	2	0	0	-56.4	51	19
pda-miR482-p3_1ss9TA	gra-MIR482-p3_1ss9TA	TTTCCAATACCTCCC	R	R	R	1	1	R	18	#VALUE!	-68.8	34	2	2	30	0	gp3a	28	531	494	1	gp3a	gaaggaggaaaaggagagaccgtttctggaaattttcggaatggaggagttggaaagattttgaattttctctgtattttaataatgaaaaaTCTTTCCAATTCCTCCCATTCCactgatttccagcacttcctctccattttcttaccttt	28	gra-MIR482,pde-MIR482b,pab-MIR482b,pab-MIR482a,gma-MIR482c,gma-MIR482a,pvu-MIR482,vun-MIR482,pgi-MIR482b,mes-MIR482,mdm-MIR482a,mdm-MIR482c,ppe-MIR482f,ppe-MIR482b,csi-MIR482a,sly-MIR482a,sly-MIR482b,nta-MIR482c,nta-MIR482a,stu-MIR482a,stu-MIR482d,vvi-MIR482,	gra-MIR482	gaaggaggaaaaggagagaccgtttctggaaattttcggaatggaggagttggaaagattttgaattttctctgtattttaataatgaaaaaTCTTTCCAATTCCTCCCATTCCactgatttccagcacttcctctccattttcttaccttt	gra-MIR482-p3	TTTCCAATTCCTCCC	3'	40	34	0	34	18197	0	18197	16941	0	16941	0	y	((((((((((((((((((...((..(((((((((...(((((((((((((((((((((((((..(((................)))..)))))))))))))))))))).)))))...))))))))).))...)))))).))))))).)))))	1	1	1	-68.8	57	21
pda-miR169d-p5_1ss14CA	bdi-MIR169d-p5_1ss14CA	TAGCCAAGAATGAATTGCCT	-	1783	1958	1	0	PDK_30s729731	20	176	-72.4	2	0	0	2	0	gp2a	1	766	766	0	gp2a	gagaggtcttacatggagataagagtctgtctttggTAGCCAAGAATGAATTGCCTctatcctcatggagggtttcaatggcttgagaaatccagcatgtttgaaagctcaacgtggtttcacgggcaatcatcttggctaatctgagtggctcatatcctccatgctagacttgc	8	gma-MIR169j,bdi-MIR169d,ata-MIR169,osa-MIR169d,osa-MIR169o,osa-MIR169n,sbi-MIR169i,zma-MIR169o,	bdi-MIR169d	atggagatggagagcctcccttgattttggTAGCCAAGAATGACTTGCCTAtgcttgccctctgctaaccagctagccatgcatggtaaccaatggacaaatttcttgtggttggcgtggttagtgtggttgcatgggtgggtcttcttggctagccagagcggctctcatccaccatgccaggcca	bdi-MIR169d-p5	TAGCCAAGAATGACTTGCCT	5'	2	2	2	0	1493	1493	0	1493	1493	0	0	y	...((((((..((((((((((.(((((..((.....(((((((((.(((.((((((......(((((..(((((((((..(((.((....)).)))....))).))))))..)))))......))))))))))))))))))....))..))))).)))).))))))..))))))..	1	1	2	-72.4	60	18
pda-miR397-p3_1ss6GA	tcc-MIR397-p3_1ss6GA	CCAGCACTGCACTCAATCATG	+	2402	2519	1	0	PDK_30s786161	21	118	-52.1	25.5	0	1	24.5	0	gp2a	17	761	761	0	gp2a	gagatcaaaagcaTCATTGAGTGCAGCGTTGATGaaactctgcatcctgttgggcgatccatcgcaccaaaggtttgaggaattcaCCAGCACTGCACTCAATCATGtctttgatatc	33	pab-MIR397,gma-MIR397a,gma-MIR397b,lja-MIR397,mtr-MIR397,ath-MIR397a,bna-MIR397a,bna-MIR397b,aly-MIR397a,aly-MIR397b,cme-MIR397,rco-MIR397,ssl-MIR397,dpr-MIR397,lus-MIR397b,lus-MIR397a,tcc-MIR397,mdm-MIR397a,mdm-MIR397b,ppe-MIR397,csi-MIR397,ptc-MIR397a,ptc-MIR397b,sly-MIR397,nta-MIR397,stu-MIR397,vvi-MIR397a,bdi-MIR397a,bdi-MIR397b,osa-MIR397a,osa-MIR397b,sbi-MIR397,zma-MIR397b,	tcc-MIR397	attcccagatggaagacacaTCATTGAGTGCAGCGTTGATGaattctttcactttttgccaactctatctcagatgaattcgccagcgctgcactcaatcatgtgttttgctctttctggaaa	tcc-MIR397-p3	ccagcgctgcactcaatcatg	3'	247	25.5	24.5	1	18015	17339	676	17975	17339	636	0	y	((.((((((..(((.(((((((((((.((((.((((..(((.((.(((.((((((((....)))).)))))))..)))))..)))).)))).))))))))))).)))..)))))).))	2	0	0	-52.1	46	18
pda-miR397_1ss20CT	pab-miR397_1ss20CT	TCATTGAGTGCAGCGTTGATG	+	2402	2519	1	0	PDK_30s786161	21	118	-52.1	98	0.5	16.5	57	24	gp2a	139	777	777	0	gp2a	gagatcaaaagcaTCATTGAGTGCAGCGTTGATGaaactctgcatcctgttgggcgatccatcgcaccaaaggtttgaggaattcaCCAGCACTGCACTCAATCATGtctttgatatc	33	pab-MIR397,gma-MIR397a,gma-MIR397b,lja-MIR397,mtr-MIR397,ath-MIR397a,bna-MIR397a,bna-MIR397b,aly-MIR397a,aly-MIR397b,cme-MIR397,rco-MIR397,ssl-MIR397,dpr-MIR397,lus-MIR397b,lus-MIR397a,tcc-MIR397,mdm-MIR397a,mdm-MIR397b,ppe-MIR397,csi-MIR397,ptc-MIR397a,ptc-MIR397b,sly-MIR397,nta-MIR397,stu-MIR397,vvi-MIR397a,bdi-MIR397a,bdi-MIR397b,osa-MIR397a,osa-MIR397b,sbi-MIR397,zma-MIR397b,	pab-MIR397	agccgtggcaaccacaTCATTGAGTGCAGCGTTGACGatagaaattccaccaatagatttgataatatctatctatttgtggaatgccattgatattgttaaccctgcactcaatagtatgtttgccaatggct	pab-miR397	TCATTGAGTGCAGCGTTGACG	5'	247	98	83.5	14.5	74995	63800.5	11194.5	74467	63800.5	10666.5	0	y	((.((((((..(((.(((((((((((.((((.((((..(((.((.(((.((((((((....)))).)))))))..)))))..)))).)))).))))))))))).)))..)))))).))	2	0	0	-52.1	46	18
pda-miR169b-3p_2ss15C-22AC	aly-miR169b-3p_2ss15C-22AC	GGCAAGTTGTCCTTGGCTACC	+	37280	37481	2	0	PDK_30s910541	21	202	-103.1	457.5	33.5	1	422	1	gp2a	429	776	776	0	gp2a	gagctgcgacggagctcgtcggaggccttacgtgaagaggcggagagtggaatgCAGCCAAGGATGACTTGccggcattagttttggaaggggctgcctcagttcggtaggttgccGGCAAGTTGTCCTTGGCTACCttctgctctcttcttctcacataaggcctttgcatgattcaaacactgccccccgcttgcagaag	247	pde-MIR169,gma-MIR169b,gma-MIR169g,gma-MIR169v,gma-MIR169f,gma-MIR169u,gma-MIR169a,gma-MIR169m,gma-MIR169p,gma-MIR169d,gma-MIR169s,gma-MIR169c,gma-MIR169h,gma-MIR169e,mtr-MIR169a,mtr-MIR169g,mtr-MIR169b,mtr-MIR169l,mtr-MIR169f,mtr-MIR169d,mtr-MIR169e,vun-MIR169,cca-MIR169a,cca-MIR169b,ath-MIR169a,ath-MIR169b,ath-MIR169c,ath-MIR169f,ath-MIR169j,ath-MIR169h,ath-MIR169d,ath-MIR169m,ath-MIR169i,ath-M…	aly-MIR169b	gtgcccaacggagtagaattgcatgaagtggagtagagtataatgCAGCCAAGGATGACTTGCCGGaacgttgttaatcatacgtataaattatgtgatgaacatatttctGGCAAGTTGTCCTTCGGCTACAttttgctctcttcttctcatgcaaactctctttgggatat	aly-miR169b-3p	GGCAAGTTGTCCTTCGGCTACA	3'	1078	457.5	444.5	13	355599	344728	10871	355121	344728	10393	0	y	...(((((((((.(((((((..((((((((.(((.(((((..(((((..(((...(((((((((..(((((((((((.......((((..((......))..))))......)))))))))))..)))))))))...)))..)))))..)))))))).))))))))..).))))..........))...))).))))))...	4	0	0	-103.1	60	14
pda-miR535_1ss3AG	pab-miR535_1ss3AG	TGGCAACGAGAGAGAGCACGC	-	1629	1714	1	1	PDK_30s1079811	21	86	-48	2	0.5	0	1.5	0	gp2a	4	777	738	1	gp2a	gagTGGCAACGAGATAGAGCACGCcagtacacagtcatgaccgcatgcatggttgccgaccggcgtgctctctctcgttgtcaacc	13	pab-MIR535,ppt-MIR535c,ppt-MIR535d,ppt-MIR535a,ppt-MIR535b,cpa-MIR535,rco-MIR535,aqc-MIR535,mdm-MIR535a,ppe-MIR535a,vvi-MIR535a,vvi-MIR535c,osa-MIR535,	pab-MIR535	aaatatccgttctattccattgcTGACAACGAGAGAGAGCACGCctgtattctcttatatgaattttgcatatgtgggcgtccatgcgtgctctctgcttgtagtcagcaaagcgactgcatctcaact	pab-miR535	TGACAACGAGAGAGAGCACGC	5'	4	2	0	2	1554	0	1554	1476	0	1476	0	y	...(((((((((((.((((((((((.((...((..((((........))))..))...)).)))))))))).)))))))))))...	2	0	0	-48	29	20
pda-miR171n_2ss20TC21AC	gma-miR171n_2ss20TC21AC	TTGAGCCGCGTCAATATCTCC	-	2661	2798	2	0	PDK_30s1013421	21	138	-61.4	434.5	41.5	6	378	9	gp2a	422	770	770	0	gp2a	gatgatgattgcagtgttttctgaccgagttggAGGTATTGGCGTGCCTCAATCtgaaaacatggttacatgctcaaatagccatgtaattggaTTGAGCCGCGTCAATATCTCCtttgctcgaacactcacatctaa	21	gma-MIR171p,gma-MIR171n,gma-MIR171m,gma-MIR171t,lja-MIR171b,mtr-MIR171b,cme-MIR171h,mes-MIR171a,lus-MIR171d,lus-MIR171g,lus-MIR171j,mdm-MIR171b,mdm-MIR171a,ppe-MIR171h,ctr-MIR171,stu-MIR171b,vvi-MIR171b,osa-MIR171i,sbi-MIR171h,zma-MIR171l,zma-MIR171m,	gma-MIR171n	atacgaattagcacatgacaaattaaggtattggcgtgcctcaatttgaatacatggctattatgacaaatccagccttgtagtttgaTTGAGCCGCGTCAATATCTTAttttgctcttcttttccatctccta	gma-miR171n	TTGAGCCGCGTCAATATCTTA	3'	470	434.5	428	6.5	334277	329299	4978	334100	329299	4801	0	y	((((.(((.(((((......)))..(((((.(((((((((((((((.(((((((..(..(((((((((..........)))))))))..)..))))))).)))))))))))))))...)))))..)).)))))))...	2	0	0	-61.4	37	20
pda-miR171i-5p_1ss12TC	osa-miR171i-5p_1ss12TC	AGGTATTGGCGCGCCTCAATC	-	2661	2798	1	1	PDK_30s1013421	21	138	-61.4	15	2	0	13	0	gp2a	8	750	713	1	gp2a	gatgatgattgcagtgttttctgaccgagttggAGGTATTGGCGTGCCTCAATCtgaaaacatggttacatgctcaaatagccatgtaattggaTTGAGCCGCGTCAATATCTCCtttgctcgaacactcacatctaa	21	gma-MIR171p,gma-MIR171n,gma-MIR171m,gma-MIR171t,lja-MIR171b,mtr-MIR171b,cme-MIR171h,mes-MIR171a,lus-MIR171d,lus-MIR171g,lus-MIR171j,mdm-MIR171b,mdm-MIR171a,ppe-MIR171h,ctr-MIR171,stu-MIR171b,vvi-MIR171b,osa-MIR171i,sbi-MIR171h,zma-MIR171l,zma-MIR171m,	osa-MIR171i	taaaaagAGGTATTGGCGTGCCTCAATCcgaaggcatggctgattacaggcacctcgaccgatctagcgcatgcagccatgtttcttGGATTGAGCCGCGTCAATATCtctccttgcttc	osa-miR171i-5p	AGGTATTGGCGTGCCTCAATC	5'	470	15	8.5	6.5	10716.5	6111	4605.5	10504	6111	4393	0	y	((((.(((.(((((......)))..(((((.(((((((((((((((.(((((((..(..(((((((((..........)))))))))..)..))))))).)))))))))))))))...)))))..)).)))))))...	2	0	0	-61.4	37	20
pda-miR396_1ss21TG	pta-miR396_1ss21TG	TTCCACAGCTTTCTTGAACTG	+	382	492	1	0	PDK_30s999911	21	111	-53	55513	3778.5	1720	49132	882.5	gp2a	60684	783	783	0	gp2a	gatggccctctctgtattcTTCCACAGCTTTCTTGAACTGcaaccatctccatggtgaccatgttaactgcgGTTCAATAAAGCTGTGGGAAAttacagagagtgaccaaa	105	pta-MIR396,pab-MIR396a,gma-MIR396i,gma-MIR396e,gma-MIR396a,gma-MIR396h,gma-MIR396c,gma-MIR396g,gma-MIR396b,gma-MIR396f,gma-MIR396d,gma-MIR396k,gma-MIR396j,aau-MIR396,amg-MIR396,lja-MIR396,mtr-MIR396b,mtr-MIR396a,mtr-MIR396c,cca-MIR396a,cca-MIR396c,cca-MIR396b,ath-MIR396a,ath-MIR396b,bna-MIR396a,aly-MIR396a,aly-MIR396b,cpa-MIR396,cme-MIR396b,cme-MIR396c,cme-MIR396a,cme-MIR396d,cme-MIR396e,hbr-MIR3…	pta-MIR396	gaatcttgtcatacttTTCCACAGCTTTCTTGAACTTtacgtgtacgggacgaggagattctgatttctacgtctgcgattaaagttcaagaaaactgtgggaaagcatggtaggattc	pta-miR396	TTCCACAGCTTTCTTGAACTT	5'	94185	55513	54291.5	1221.5	4.1771e+07	40857175	913820	4.1733e+07	40857175	875834	0	y	..(((..(((((((((...((((((((((((.((((((((((........(((((...))))).....)))))))))).))))))))))))...)))))))))...)))..	2	0	0	-53	34	20
pda-miR535-p3_1ss8CT	tcc-MIR535-p3_1ss8CT	GTGCTCTTTCTCGTTGTCA	+	16260	16414	1	1	PDK_30s790121	19	155	-88.3	4	0	0	4	0	gp2a	8	712	673	1	gp2a	gatgggttgggtttggtgctttggccgggcatgatgggTGACAACGAGAGAGAGCACGCcggtcggcagtcatgcagggtgccatggctgggtactggcGTGCTCTTTCTCGGTGTCAcctcagttctccccacaaagcatctcctcaattcctt	21	pab-MIR535,ppt-MIR535c,ppt-MIR535d,ppt-MIR535a,ppt-MIR535b,cpa-MIR535,mes-MIR535b,mes-MIR535a,rco-MIR535,tcc-MIR535,aqc-MIR535,mdm-MIR535a,mdm-MIR535b,mdm-MIR535c,mdm-MIR535d,ppe-MIR535a,ppe-MIR535b,csi-MIR535,vvi-MIR535a,vvi-MIR535c,osa-MIR535,	tcc-MIR535	acagctttgtacatatcataTGACAACGATAGAGAGCACGCttgtacacatccatgtccttgcaagaatgccaacgagcgtgctctctctcgttgtcaattgataatgtgtcaaatctca	tcc-MIR535-p3	gtgctctctctcgttgtca	3'	5641	4	0	4	2848	0	2848	2692	0	2692	0	y	...(..(((((...(((((((((...(((.....(((((((((.(((((((((((((((((((...(((((((((.....).))))))))...))))))))))))))))))).))))))).)).....)))..)))))))))..)))))..)...	2	0	0	-88.3	55	20
pda-miR535_1ss13AG	pab-miR535_1ss13AG	TGACAACGAGAGGGAGCACGC	-	3711	3836	1	1	PDK_30s939421	21	126	-57.7	2	0	0	2	0	gp2a	3	759	721	1	gp2a	gcagctttgctgggtgaagctgagTGACAACGAGAAGGAGCACGCcagtacacactcatggccccaagcatgattgccgaccagcgtgctctctctcgttgtcaaccaaagccaggccgaagcaca	15	pab-MIR535,ppt-MIR535c,ppt-MIR535d,ppt-MIR535a,ppt-MIR535b,cpa-MIR535,mes-MIR535b,mes-MIR535a,rco-MIR535,aqc-MIR535,mdm-MIR535a,ppe-MIR535a,vvi-MIR535a,vvi-MIR535c,osa-MIR535,	pab-MIR535	aaatatccgttctattccattgcTGACAACGAGAGAGAGCACGCctgtattctcttatatgaattttgcatatgtgggcgtccatgcgtgctctctgcttgtagtcagcaaagcgactgcatctcaact	pab-miR535	TGACAACGAGAGAGAGCACGC	5'	4	2	0	2	1422	0	1422	1345.5	0	1345.5	0	y	...(((((((..(((.....((..(((((((((((..((((((((..((...((.(((((........))))).))...))..))))))))..)))))))))))..))..)))..)).)))))...	4	0	0	-57.7	40	19
pda-miR479_2ss1CT12TA	ghr-miR479_2ss1CT12TA	TGTGATATTGGATCGGCTCATC	+	128246	128380	2	0	PDK_30s740551	22	135	-60.6	26	0	10	11	5	gp2a	12	800	800	0	gp2a	gcagttgaagaagaagaagaagaagacatgaTGTGATATTGGATCGGCTCATCtctttttgattaagattcagaagaagaggCGAGCCGAACCAATATCACTCatgtatgcttcattcgcaaccctttcaacgcc	13	lus-MIR171h,ghr-MIR479,mdm-MIR171i,csi-MIR479,csi-MIR171b,nta-MIR479b,stu-MIR479,vvi-MIR479,osa-MIR171h,sbi-MIR171f,sbi-MIR171e,zma-MIR171h,zma-MIR171k,	ghr-MIR479	ggaggagtagacacgaCGTGATATTGGTTCGGCTCATCttattgtgattaaaaatttcaaggcgagccgaatcaatatcactcatgtatgctttttt	ghr-miR479	CGTGATATTGGTTCGGCTCATC	5'	548	26	25	1	19911	19209	702	19876	19209	667	0	y	((.(((((((.....(((((((...((((((.((((((((((.(((((((..((((((((((.......)))..)))))))..))))))).))))))))))))))))...)))).))).......))))))))).	4	0	0	-60.6	49	18
pda-miR396_1ss21TG	pta-miR396_1ss21TG	TTCCACAGCTTTCTTGAACTG	+	1092	1203	1	0	PDK_30s1195041	21	112	-50.7	57315.5	4095.5	1793	50701	726	gp2a	60684	783	783	0	gp2a	gccctctctgtattcTTCCACAGCTTTCTTGAACTGctgccatcaactatacttccatggtgggaatcttaactgcaGTTCAATAAAGCTGTGGGAAattacagagagagac	105	pta-MIR396,pab-MIR396a,gma-MIR396i,gma-MIR396e,gma-MIR396a,gma-MIR396h,gma-MIR396c,gma-MIR396g,gma-MIR396b,gma-MIR396f,gma-MIR396d,gma-MIR396k,gma-MIR396j,aau-MIR396,amg-MIR396,lja-MIR396,mtr-MIR396b,mtr-MIR396a,mtr-MIR396c,cca-MIR396a,cca-MIR396c,cca-MIR396b,ath-MIR396a,ath-MIR396b,bna-MIR396a,aly-MIR396a,aly-MIR396b,cpa-MIR396,cme-MIR396b,cme-MIR396e,cme-MIR396c,cme-MIR396a,cme-MIR396d,hbr-MIR3…	pta-MIR396	gaatcttgtcatacttTTCCACAGCTTTCTTGAACTTtacgtgtacgggacgaggagattctgatttctacgtctgcgattaaagttcaagaaaactgtgggaaagcatggtaggattc	pta-miR396	TTCCACAGCTTTCTTGAACTT	5'	114657	57315.5	56695	620.5	40004179	3.95431e+07	461032	39986092	3.95431e+07	442944	0	y	...(((((((((...((((((((((((.(((((((((..((((((............))))))...........))))))))).))))))))))))...)))))))))....	2	0	0	-50.7	30	20
pda-miR160e-3p_2ss11TA21GA	osa-miR160e-3p_2ss11TA21GA	GCGTGCGAGGAGCCAAGCATA	-	20407	20566	2	0	PDK_30s969081	21	160	-75.4	1	0	0	1	0	gp2a	1	756	756	0	gp2a	gctgagaaaaatgggaaggtagaagaggtgagatgagttgTGCCTGGCTCCCTGTATGCCActggcttggaaactaatctaccaatagattagctacggcgggtgGCGTGCGAGGAGCCAAGCATActctcgctctctctctctctctctctctctctct	33	ppt-MIR160b,ppt-MIR160i,ahy-MIR160,mtr-MIR160c,cca-MIR160a,cpa-MIR160d,cme-MIR160d,mes-MIR160c,mes-MIR160f,mes-MIR160e,rco-MIR160b,rco-MIR160c,lus-MIR160c,lus-MIR160g,tcc-MIR160a,tcc-MIR160c,aqc-MIR160a,ptc-MIR160d,ptc-MIR160a,ptc-MIR160f,ptc-MIR160g,ptc-MIR160e,nta-MIR160d,nta-MIR160c,stu-MIR160b,vvi-MIR160c,vvi-MIR160a,vvi-MIR160b,bdi-MIR160e,osa-MIR160e,osa-MIR160f,sbi-MIR160f,zma-MIR160f,	osa-MIR160e	gtaggggataTGCCTGGCTCCCTGTATGCCGctcgcatggctgccaacccaatgaactcgatctcgttgttggccgctgcgtacgGCGTGCGAGGTGCCAAGCATGgccctctt	osa-miR160e-3p	GCGTGCGAGGTGCCAAGCATG	3'	13	1	1	0	756	756	0	756	756	0	0	y	...((((.....((((..(.((((((((.((((((((.(((((.(((((((..(((((((((..((((((...((((((((....))))))))))).)))..)))))))))..))))))).)))))..)))).))))))))).))))..))))..)))).	4	0	0	-75.4	60	18
pda-miR160b_2ss1CT15TA	ppt-miR160b_2ss1CT15TA	TGCCTGGCTCCCTGAATGCCA	-	20407	20566	2	1	PDK_30s969081	21	160	-75.4	9	0	0	9	0	gp2a	6	773	738	1	gp2a	gctgagaaaaatgggaaggtagaagaggtgagatgagttgTGCCTGGCTCCCTGTATGCCActggcttggaaactaatctaccaatagattagctacggcgggtgGCGTGCGAGGAGCCAAGCATActctcgctctctctctctctctctctctctctct	33	ppt-MIR160b,ppt-MIR160i,ahy-MIR160,mtr-MIR160c,cca-MIR160a,cpa-MIR160d,cme-MIR160d,mes-MIR160c,mes-MIR160f,mes-MIR160e,rco-MIR160b,rco-MIR160c,lus-MIR160c,lus-MIR160g,tcc-MIR160a,tcc-MIR160c,aqc-MIR160a,ptc-MIR160d,ptc-MIR160a,ptc-MIR160f,ptc-MIR160g,ptc-MIR160e,nta-MIR160d,nta-MIR160c,stu-MIR160b,vvi-MIR160c,vvi-MIR160a,vvi-MIR160b,bdi-MIR160e,osa-MIR160e,osa-MIR160f,sbi-MIR160f,zma-MIR160f,	ppt-MIR160i	cgttagcacggaatatgggatactggatcCGCCTGGCTCCCTGTATGCCAcctgcgaagcatgctaaaggtttttgccaggatttgcagctggcgttcagggagtcaagcaggcctcaagtcttcccgtaaccagcgcc	ppt-miR160b	CGCCTGGCTCCCTGTATGCCA	5'	13	9	0	9	6888	0	6888	6631	0	6631	0	y	...((((.....((((..(.((((((((.((((((((.(((((.(((((((..(((((((((..((((((...((((((((....))))))))))).)))..)))))))))..))))))).)))))..)))).))))))))).))))..))))..)))).	4	0	0	-75.4	60	18
pda-miR2111b-p3_1ss15CT	ptc-MIR2111b-p3_1ss15CT	CAGGATTGGGTAATTTGC	-	139	290	1	0	M01000000011	18	152	-41.2	3	0	0	3	0	gp2a	3	655	655	0	gp2a	gctgctggcaccagacttgccctccaatggatcctcgttaagggatttagattgtactcattccaattaccagactcgaggagcccggtattgttatttattgtcactacctccccgtgtCAGGATTGGGTAATTTGCgcgcctgctgcctt	1	ptc-MIR2111b,	ptc-MIR2111b	atattgggtcaggattgggTAATCTGCATCCTGAGGTTTGgatcaccacatgttttgatctagtccttgggttgcagattacctcttcctcactgacaatgt	ptc-MIR2111b-p3	caggattgggTAATCTGC	3'	3	3	3	0	1965	1965	0	1965	1965	0	0	y	((.((.(((..((((.(((((((((...((.((((((.....((..((.((.((....)).)).))...)).....)))))).)).((((.((...........)).))))...........)))..))))))))))...))).)).))...	2	2	2	-41.2	20	13
pda-miR535-p3_1ss8CT	tcc-MIR535-p3_1ss8CT	GTGCTCTTTCTCGTTGTCA	-	6642	6783	1	0	PDK_30s715261	19	142	-74.8	6	0	0	6	0	gp2a	8	712	712	0	gp2a	gctggcttggtgctttggccggcgtggttggCTGACAACGAGAGAGAGCACGCcggtcggcagtcatgcaaggtgccatggctgtgtactagcGTGCTCTTTCTCGTTGTCAccccagttctccccacaaagcatctcctcg	21	pab-MIR535,ppt-MIR535c,ppt-MIR535d,ppt-MIR535a,ppt-MIR535b,cpa-MIR535,mes-MIR535b,mes-MIR535a,rco-MIR535,tcc-MIR535,aqc-MIR535,mdm-MIR535a,mdm-MIR535d,mdm-MIR535b,mdm-MIR535c,ppe-MIR535a,ppe-MIR535b,csi-MIR535,vvi-MIR535a,vvi-MIR535c,osa-MIR535,	tcc-MIR535	acagctttgtacatatcataTGACAACGATAGAGAGCACGCttgtacacatccatgtccttgcaagaatgccaacgagcgtgctctctctcgttgtcaattgataatgtgtcaaatctca	tcc-MIR535-p3	gtgctctctctcgttgtca	3'	992	6	6	0	4125	4125	0	4125	4125	0	0	y	...((...(((((((((...((..(((..((.(((((((((((((((((((((..((..((((((((((.....).)))))))))..))..)))))))))))))))))))))))))).....))...))))))))).))...	0	0	0	-74.8	51	21
pda-miR169_1ss20TG	pde-miR169_1ss20TG	CAGCCAAGGATGACTTGCCGA	+	12121	12274	1	0	PDK_30s901791	21	154	-65.1	1679.5	59.5	0	1617.5	2.5	gp2a	2872	780	780	0	gp2a	gcttcacattaggttcaggaagcaatggtgCAGCCAAGGATGACTTGCCGAcccttcaatagaattctcctgttcctcctttgaaggaagtttgaagaaagaggCCGGCAAGTTGTCTTTGGCTACacattttttcctgctcctcatgcgagtc	112	pde-MIR169,gma-MIR169b,gma-MIR169p,gma-MIR169c,gma-MIR169k,gma-MIR169l,gma-MIR169g,gma-MIR169v,gma-MIR169f,gma-MIR169u,gma-MIR169a,gma-MIR169m,mtr-MIR169a,mtr-MIR169g,mtr-MIR169b,mtr-MIR169l,vun-MIR169,ath-MIR169a,ath-MIR169d,ath-MIR169e,ath-MIR169b,ath-MIR169c,bna-MIR169b,bna-MIR169a,bna-MIR169n,aly-MIR169a,aly-MIR169e,aly-MIR169d,aly-MIR169c,aly-MIR169b,cme-MIR169h,cme-MIR169f,mes-MIR169g,mes-M…	pde-MIR169	actatttattCAGCCAAGGATGACTTGCCTAgatcttgttaccagtatcggctagttatgctgatatcgatttcagtcactaggtgagtcgtccttggctaaa	pde-miR169	CAGCCAAGGATGACTTGCCTA	5'	4250	1679.5	1663	16.5	1278827	1.26604e+06	12783.5	1278441	1.26604e+06	12397.5	0	y	..(((.(((.(((..(((((((.....(((.(((((((((..((((((((.((((((((..((((......)))).((((....))))...)))))).....)).))))))))..))))))))).)))....)))))))..))).))).)))..	4	0	0	-65.1	44	17
pda-miR169l-3p_2ss2GC13TC	gma-miR169l-3p_2ss2GC13TC	CCGGCAAGTTGTCTTTGGCTAC	+	12121	12274	2	0	PDK_30s901791	22	154	-65.1	874	120.5	6.5	741.5	5.5	gp2a	453	822	822	0	gp2a	gcttcacattaggttcaggaagcaatggtgCAGCCAAGGATGACTTGCCGAcccttcaatagaattctcctgttcctcctttgaaggaagtttgaagaaagaggCCGGCAAGTTGTCTTTGGCTACacattttttcctgctcctcatgcgagtc	112	pde-MIR169,gma-MIR169b,gma-MIR169p,gma-MIR169c,gma-MIR169k,gma-MIR169l,gma-MIR169g,gma-MIR169v,gma-MIR169f,gma-MIR169u,gma-MIR169a,gma-MIR169m,mtr-MIR169a,mtr-MIR169g,mtr-MIR169b,mtr-MIR169l,vun-MIR169,ath-MIR169a,ath-MIR169d,ath-MIR169e,ath-MIR169b,ath-MIR169c,bna-MIR169b,bna-MIR169a,bna-MIR169n,aly-MIR169a,aly-MIR169e,aly-MIR169d,aly-MIR169c,aly-MIR169b,cme-MIR169h,cme-MIR169f,mes-MIR169g,mes-M…	gma-MIR169l	gagtgatttgCAGCCAAGAATGACTTGCCGGaatgcatatatatgcattaggtaccaacatatatagttgtattgtataatttCGGGCAAGTTGTTTTTGGCTACatttatctc	gma-miR169l-3p	CGGGCAAGTTGTTTTTGGCTAC	3'	4250	874	825.5	48.5	684724	645952	38772.5	683052	645952	37100	0	y	..(((.(((.(((..(((((((.....(((.(((((((((..((((((((.((((((((..((((......)))).((((....))))...)))))).....)).))))))))..))))))))).)))....)))))))..))).))).)))..	4	0	0	-65.1	44	17
pda-miR167-3p_2ss8GC20CT	ahy-miR167-3p_2ss8GC20CT	AGATCATCTGGCAGTTTCATC	+	6356	6493	2	0	PDK_30s986061	21	138	-57.2	94	6.5	2	85	0.5	gp2a	139	779	779	0	gp2a	gcttcttttggtgcaccacaagttgcTGAAGCTGCCAGCATGATCTGAtcccttctctatcctcggcttcttgatttcccggaggaagcccatcAGATCATCTGGCAGTTTCATCtactgatgggagcatgaagaaac	144	ppt-MIR167,gma-MIR167g,gma-MIR167c,gma-MIR167b,gma-MIR167e,gma-MIR167f,gma-MIR167a,gma-MIR167d,gso-MIR167a,ahy-MIR167,lja-MIR167,lja-MIR167c,lja-MIR167a,lja-MIR167b,mtr-MIR167b,mtr-MIR167a,cca-MIR167,ath-MIR167d,ath-MIR167c,ath-MIR167b,ath-MIR167a,bna-MIR167d,bna-MIR167a,bna-MIR167c,bna-MIR167b,aly-MIR167d,aly-MIR167c,aly-MIR167b,aly-MIR167a,cpa-MIR167d,cpa-MIR167c,cpa-MIR167a,cme-MIR167f,cme-MIR…	ahy-MIR167	gatcatgcaccactacaagtTGAAGCTGCCAGCATGATCTTaactttccctctcctatgatttgttggggtgagatcAGATCATGTGGCAGTTTCACCtagttgttggaagcatgaat	ahy-miR167-3p	AGATCATGTGGCAGTTTCACC	3'	20293	94	90.5	3.5	72036	69355	2681	71935.5	69355	2580.5	0	y	..((((((..((((.(((..(((...((((((((((((.((((((((((...............((((((((..........)))))))).))))))))))))))))))))))...)))..)))..))))))))))..	1	1	1	-57.2	38	21
pda-miR167-3p_2ss10GT20CT	ahy-miR167-3p_2ss10GT20CT	AGATCATGTTGCAGTTTCATC	-	12307	12461	2	0	PDK_30s916831	21	155	-68.6	364.5	22.5	1	339	2	gp2a	565	781	781	0	gp2a	gctttgatggtatgtggtgcaccacaagcagcTGAAGCTGCCAGCATGATCTGATctctctttttctttcttccagatcttggatgaagaagatgcatatcAGATCATGTTGCAGTTTCATCtgctgatgggagcaccagaaaaccctacaaccc	146	ppt-MIR167,gma-MIR167b,gma-MIR167c,gma-MIR167a,gma-MIR167d,gma-MIR167g,gma-MIR167e,gma-MIR167f,gso-MIR167a,ahy-MIR167,lja-MIR167c,lja-MIR167a,lja-MIR167,lja-MIR167b,mtr-MIR167b,mtr-MIR167a,cca-MIR167,ath-MIR167b,ath-MIR167d,ath-MIR167a,ath-MIR167c,bna-MIR167a,bna-MIR167c,bna-MIR167d,bna-MIR167b,aly-MIR167b,aly-MIR167d,aly-MIR167a,aly-MIR167c,cpa-MIR167c,cpa-MIR167a,cpa-MIR167d,cme-MIR167f,cme-MIR…	ahy-MIR167	gatcatgcaccactacaagtTGAAGCTGCCAGCATGATCTTaactttccctctcctatgatttgttggggtgagatcAGATCATGTGGCAGTTTCACCtagttgttggaagcatgaat	ahy-miR167-3p	AGATCATGTGGCAGTTTCACC	3'	1387	364.5	363	1.5	278853	277762	1091.5	278797	277762	1035.5	0	y	...(((..(((...((((((.(((..(((((.((((((((.((((((((((((((......((((((((..(((((...))))).)))))))).....)))))))))))))))))))))).)))))..)))..))))))....)))...)))...	1	1	1	-68.6	55	22
pda-miR164b-3p_2ss16AT20TC	aly-miR164b-3p_2ss16AT20TC	CATGTGCCCATCTTCTCCACC	+	7126	7255	2	0	PDK_30s732141	21	130	-59.1	22	2.5	1	16	2.5	gp2a	23	781	781	0	gp2a	ggaaggtgggttgtgcaggaTGGAGAAGCAGGGCACGTGCAttactacttgacatctctccttcaccaagttaaagagttagatagttcttCATGTGCCCATCTTCTCCACCatgcccaccccacctaat	75	gma-MIR164e,gma-MIR164j,gma-MIR164f,gma-MIR164h,gma-MIR164c,gma-MIR164i,gma-MIR164g,gma-MIR164d,gma-MIR164a,gma-MIR164b,gma-MIR164k,mtr-MIR164c,mtr-MIR164a,mtr-MIR164b,ath-MIR164a,ath-MIR164b,bna-MIR164a,bra-MIR164a,aly-MIR164b,aly-MIR164a,cpa-MIR164c,cpa-MIR164b,cpa-MIR164a,cme-MIR164d,cme-MIR164c,mes-MIR164a,mes-MIR164b,mes-MIR164c,rco-MIR164c,rco-MIR164a,rco-MIR164b,ssl-MIR164b,ssl-MIR164a,lus…	aly-MIR164b	gaTGGAGAAGCAGGGCACGTGCAttactagctcatctcgtatgcatatatatatacatcctcaccacaaatgcgtgtatatgtgcggagatatagatatatatgtgtgtggagtgtgatgatataaatgagttagttcttCATGTGCCCATCTTCACCATC	aly-miR164b-3p	CATGTGCCCATCTTCACCATC	3'	182	22	13.5	8.5	17321	10605	6716	16991.5	10605	6386.5	0	y	...(((((((.((.(((((.((((((((..(((((((((....((((..((((.(((...(((....)))....)))))))..))))....)))))))))..)))))))))).))).)).)))))))...	4	0	0	-59.1	45	17
pda-miR164b-3p_2ss16AT20TC	aly-miR164b-3p_2ss16AT20TC	CATGTGCCCATCTTCTCCACC	+	1241	1372	2	0	PDK_30s657731	21	132	-62.4	13.5	1	0.5	9.5	2.5	gp2a	23	781	781	0	gp2a	ggaaggtgggttgtgcaggaTGGAGAAGCAGGGCACGTGCAttactattgaacacctctctttcaccaagttacagagagttatgtagttcttCATGTGCCCATCTTCTCCACCatgcccaacctacctaat	75	gma-MIR164e,gma-MIR164j,gma-MIR164f,gma-MIR164h,gma-MIR164c,gma-MIR164i,gma-MIR164g,gma-MIR164d,gma-MIR164a,gma-MIR164b,gma-MIR164k,mtr-MIR164c,mtr-MIR164a,mtr-MIR164b,ath-MIR164a,ath-MIR164b,bna-MIR164a,bra-MIR164a,aly-MIR164b,aly-MIR164a,cpa-MIR164c,cpa-MIR164b,cpa-MIR164a,cme-MIR164d,cme-MIR164c,mes-MIR164a,mes-MIR164b,mes-MIR164c,rco-MIR164c,rco-MIR164a,rco-MIR164b,ssl-MIR164b,ssl-MIR164a,lus…	aly-MIR164b	gaTGGAGAAGCAGGGCACGTGCAttactagctcatctcgtatgcatatatatatacatcctcaccacaaatgcgtgtatatgtgcggagatatagatatatatgtgtgtggagtgtgatgatataaatgagttagttcttCATGTGCCCATCTTCACCATC	aly-miR164b-3p	CATGTGCCCATCTTCACCATC	3'	166	13.5	13.5	0	10605	10605	0	10605	10605	0	0	y	...((((((((((.(((((.((((((((..(((((((((....(((((.......((((((.............))))))....)))))....)))))))))..)))))))))).))).))))))))))...	4	0	0	-62.4	43	17
pda-miR530a-p3_1ss12TG	ptc-MIR530a-p3_1ss12TG	TTTCTTTCTTTGGTTTTTG	-	12810	12874	1	0	PDK_30s726751	19	65	-17.9	2	0	0	2	0	gp2a	2	684	684	0	gp2a	ggagaggaagaaaaccggaggggagaaaagatttgTTTCTTTCTTTGGTTTTTGaaaaattcaga	1	ptc-MIR530a,	ptc-MIR530a	gccaacatgttgcctttatcTGCATTTGCACCTGCACCTTacttgtttctttcttttgtttttgactccaaaaccaaaagtaagtttgaaacattaaaacaagcttgaggtgcaggtgcaggtgcaggtgaatgccatgttggt	ptc-MIR530a-p3	tttctttcttttgtttttg	3'	2	2	2	0	1368	1368	0	1368	1368	0	0	y	(((......((((((((.(((..(((((.......)))))..)))))))))))......)))...	4	1	1	-17.9	19	16
pda-miR164a-3p_1ss10TC	bdi-miR164a-3p_1ss10TC	CATGTGCCCCTCTTCTCCACC	-	7373	7499	1	0	PDK_30s1042791	21	127	-62.4	9.5	1.5	0.5	7.5	0	gp2a	16	797	797	0	gp2a	ggagatgggctgtgcgaggTGGAGAAGCAGGGCACGTGCAttactatctatcacatactctcatggaagagaggagacggctagttcttCATGTGCCCCTCTTCTCCACCaagcccaactcatctaa	90	cln-MIR164,gma-MIR164e,gma-MIR164j,gma-MIR164f,gma-MIR164h,gma-MIR164c,gma-MIR164i,gma-MIR164g,gma-MIR164d,gma-MIR164a,gma-MIR164b,gma-MIR164k,mtr-MIR164c,mtr-MIR164a,mtr-MIR164b,hci-MIR164a,ath-MIR164a,ath-MIR164b,ath-MIR164c,bna-MIR164a,bna-MIR164d,bna-MIR164c,bna-MIR164b,bra-MIR164a,aly-MIR164b,aly-MIR164a,aly-MIR164c,cpa-MIR164c,cpa-MIR164b,cpa-MIR164a,cme-MIR164c,cme-MIR164a,cme-MIR164d,mes-…	bdi-MIR164a	gagtggacatatgaggcgaggcgcgcgaggTGGAGAAGCAGGGCACGTGCAttcgttccagctcgccgccggtgtgccgcgccgcggcctgggcgcgcgtgtcgcccgagcggccggccatgcgcgtgtgtgtgcatgCATGTGCCCTTCTTCTCCACCgcgcaagcctcgcctgcgaacgcgcgcgcacgcc	bdi-miR164a-3p	CATGTGCCCTTCTTCTCCACC	3'	38	9.5	9.5	0	7342	7342	0	7342	7342	0	0	y	..(((((((.((.((..((((((((((..(((((((((....((((.(..((.....(((((......)))))..))..).))))....)))))))))..))))))))))..)).)).)))))))..	4	0	0	-62.4	42	17
pda-miR164_1ss21GC	cln-miR164_1ss21GC	TGGAGAAGCAGGGCACGTGCC	-	7373	7499	1	1	PDK_30s1042791	21	127	-62.4	10	0	1.5	7.5	1	gp2a	12	765	726	1	gp2a	ggagatgggctgtgcgaggTGGAGAAGCAGGGCACGTGCAttactatctatcacatactctcatggaagagaggagacggctagttcttCATGTGCCCCTCTTCTCCACCaagcccaactcatctaa	90	cln-MIR164,gma-MIR164e,gma-MIR164j,gma-MIR164f,gma-MIR164h,gma-MIR164c,gma-MIR164i,gma-MIR164g,gma-MIR164d,gma-MIR164a,gma-MIR164b,gma-MIR164k,mtr-MIR164c,mtr-MIR164a,mtr-MIR164b,hci-MIR164a,ath-MIR164a,ath-MIR164b,ath-MIR164c,bna-MIR164a,bna-MIR164d,bna-MIR164c,bna-MIR164b,bra-MIR164a,aly-MIR164b,aly-MIR164a,aly-MIR164c,cpa-MIR164c,cpa-MIR164b,cpa-MIR164a,cme-MIR164c,cme-MIR164a,cme-MIR164d,mes-…	cln-MIR164	cctggTGGAGAAGCAGGGCACGTGCGatacacagaaacaattgtataaaccattatcgcatgtgctttccttctccaccaggc	cln-miR164	TGGAGAAGCAGGGCACGTGCG	5'	38	10	0	10	7519	0	7519	7133	0	7133	0	y	..(((((((.((.((..((((((((((..(((((((((....((((.(..((.....(((((......)))))..))..).))))....)))))))))..))))))))))..)).)).)))))))..	4	0	0	-62.4	42	17
pda-miR6424-p3_1ss2GC	ptc-MIR6424-p3_1ss2GC	TCGTGCCACGCTGTGTGCGTC	+	12525	12617	1	0	PDK_30s838941	21	93	-64.7	43.5	3	1	37.5	2	gp2a	78	775	775	0	gp2a	gggagggaggggtggcatgagacgcgcatggcgtggaacgatcaccgttcggTCGTGCCACGCTGTGTGCGTCtgatgcgatctctctctaga	6	ppt-MIR536b,ppt-MIR536d,ppt-MIR536f,ppt-MIR536e,ppt-MIR536a,ptc-MIR6424,	ptc-MIR6424	aggaaggtttcagaCGCTCGCCAGCGTTGCACCACCaaaacttgcaaaagttctgatggtgccacgctgtgtgcgtctaaaatctctt	ptc-MIR6424-p3	tggtgccacgctgtgtgcgtc	3'	87	43.5	43.5	0	33254.5	33254.5	0	33254.5	33254.5	0	0	y	...((((((((((.((((.(((((((((..((((((.((((((.......)))))).))))))..))))))))).)))).))))))))))...	4	0	0	-64.7	35	18
pda-miR171i-5p_1ss12TC	osa-miR171i-5p_1ss12TC	AGGTATTGGCGCGCCTCAATC	-	24971	25107	1	0	PDK_30s857171	17	137	-64.6	14	2	0	12	0	gp2a	8	750	750	0	gp2a	ggtgattggagtgttcgactgagttggAGGTATTGGCGCGCCTCAATCtgaaaacatggttacatactcgaatagccatgtaattggaTTGAGCCGCGTCAATATCTCcttcacacgaaacactcacatcgatctaa	21	gma-MIR171m,gma-MIR171t,gma-MIR171p,gma-MIR171n,lja-MIR171b,mtr-MIR171b,cme-MIR171h,mes-MIR171a,lus-MIR171g,lus-MIR171d,lus-MIR171j,mdm-MIR171b,mdm-MIR171a,ppe-MIR171h,ctr-MIR171,stu-MIR171b,vvi-MIR171b,osa-MIR171i,sbi-MIR171h,zma-MIR171m,zma-MIR171l,	osa-MIR171i	taaaaagAGGTATTGGCGTGCCTCAATCcgaaggcatggctgattacaggcacctcgaccgatctagcgcatgcagccatgtttcttGGATTGAGCCGCGTCAATATCtctccttgcttc	osa-miR171i-5p	AGGTATTGGCGTGCCTCAATC	5'	61	14	5.5	8.5	10165.5	4054.5	6111	9863.5	4054.5	5809	0	y	((((((..(((((((((..((((..(((((((((((((((.(((((((..(..(((((((((..........)))))))))..)..))))))).)))))))))))))))))))..)))).)))))..))).)))...	2	0	0	-64.6	51	20
pda-miR1424-p3_1ss15TC	osa-MIR1424-p3_1ss15TC	CTGAACAACAAGATCATA	+	4909	4982	1	0	PDK_30s859811	18	74	-18.1	1	0	0	1	0	gp2a	1	653	653	0	gp2a	ggttcaagataagttcactgatttgttggaaagaatatataCTGAACAACAAGATCATAgagaaatcttgagat	1	osa-MIR1424,	osa-MIR1424	ccagctagtttagctcccaggccagtcaaggtagaggcagctcaaagtgtagtcatctcttgatcgttgattgctccagtcctatcccatgctcctccttgagctcccaatcattgagctctcggatcctctctgctcttctctgatctggtgtcgttccagtttccaaacatgttgcagaatgaagaacactgaacaacaagattataaggtaggtaagtagttgatcatttcaggtttccagagatgataaagcaatcagggatgcATGCACACTGATGCTGATTGTacaaactccaa	osa-MIR1424-p3	ctgaacaacaagattata	3'	2	1	1	0	617	617	0	617	617	0	0	y	..((((((((...(((..((((((((((...((........))...)))).))))))..)))..))))))))..	6	1	1	-18.1	23	12
pda-miR6424-p3_1ss2GC	ptc-MIR6424-p3_1ss2GC	TCGTGCCACGCTGTGTGCGTC	+	3768	3846	1	0	PDK_30s1208551	21	79	-52.7	43.5	3	1	37.5	2	gp2a	78	775	775	0	gp2a	gtgtcatgagacgcgcacggcgtggaacggtcaacgttgaggagttcggTCGTGCCACGCTGTGTGCGTCtcatgggct	6	ppt-MIR536b,ppt-MIR536d,ppt-MIR536f,ppt-MIR536e,ppt-MIR536a,ptc-MIR6424,	ptc-MIR6424	aggaaggtttcagaCGCTCGCCAGCGTTGCACCACCaaaacttgcaaaagttctgatggtgccacgctgtgtgcgtctaaaatctctt	ptc-MIR6424-p3	tggtgccacgctgtgtgcgtc	3'	87	43.5	43.5	0	33254.5	33254.5	0	33254.5	33254.5	0	0	y	...((((((((((((((((((((((.(((..((((........))).)..))).))))))))))))))))))))))...	2	0	0	-52.7	29	19
pda-miR164_1ss21GC	cln-miR164_1ss21GC	TGGAGAAGCAGGGCACGTGCC	-	311	508	1	1	PDK_30s989081	21	198	-82.2	8	0	0.5	7	0.5	gp2a	12	765	726	1	gp2a	gttgcaggtcgagcttcttgatgctctagaggttgtggaaagatgggttgtgcaaggTGGAGAAGCAGGGCACGTGCGttactatctatcacatcttcttctaggagagtggagtcagctagttcttcatgtgcccagcttctccacctagccaaactcatctattttatacagagcacagcatggatgacaaaggct	90	cln-MIR164,gma-MIR164e,gma-MIR164j,gma-MIR164f,gma-MIR164h,gma-MIR164c,gma-MIR164i,gma-MIR164g,gma-MIR164d,gma-MIR164a,gma-MIR164b,gma-MIR164k,mtr-MIR164c,mtr-MIR164a,mtr-MIR164b,hci-MIR164a,ath-MIR164c,ath-MIR164a,ath-MIR164b,bna-MIR164d,bna-MIR164c,bna-MIR164b,bna-MIR164a,bra-MIR164a,aly-MIR164c,aly-MIR164b,aly-MIR164a,cpa-MIR164c,cpa-MIR164b,cpa-MIR164a,cme-MIR164a,cme-MIR164d,cme-MIR164c,mes-…	cln-MIR164	cctggTGGAGAAGCAGGGCACGTGCGatacacagaaacaattgtataaaccattatcgcatgtgctttccttctccaccaggc	cln-miR164	TGGAGAAGCAGGGCACGTGCG	5'	16	8	0	8	6006	0	6006	5692	0	5692	0	y	...((..((((..((..(((.((((((....(.(((..(((((((((((..((.((((((((((((.(((((((((....((((.((.((((.(((((.....)))))))))....)).))))....))))))))).)))))))))))).))..))))))))).))..)))))))))))))...)).))))....)).	2	0	0	-82.2	70	18
pda-miR528-p3_1ss15TC	osa-MIR528-p3_1ss15TC	CCTGTGCTTGCCTCCTCCA	-	15402	15570	1	1	PDK_30s799661	19	169	-75.4	9	0	0.5	8.5	0	gp2a	18	708	672	1	gp2a	nagagagagagagattgggatgtagcagtagcagTGGAAGGGACATGCAGAGGAaaggccaagaaagagaggaggcaaaaatggttctcatctcaatgcttcttctcaaggcagattCCTGTGCATGCCTCCTCCAcccctgctgctaccattcccctccccttctgaa	6	bdi-MIR528,ssp-MIR528,osa-MIR528,sbi-MIR528,zma-MIR528b,zma-MIR528a,	osa-MIR528	agTGGAAGGGGCATGCAGAGGAGcaggagattcagtttgaagctggacttcacttttgcctctctctCCTGTGCTTGCCTCTTCCATT	osa-MIR528-p3	CCTGTGCTTGCCTCTTCCA	3'	110	9	0	9	6372	0	6372	6048	0	6048	0	y	...((((...(((...(((((((((((((((..(((((.(((.((((((.(((((..(((......(((((((((((.....(((....)))....)))))))))))..)))...))))).)))))).))).)))))..)))))))))).))))).)))...))))...	2	0	0	-75.4	58	17
pda-miR397-p3_1ss15AG	rco-MIR397-p3_1ss15AG	CCAGCGCTGCATTCGA	-	1695	1831	1	0	PDK_30s816511	16	137	-54.6	7	0	0	7	0	gp2a	5	604	604	0	gp2a	taaatcaaaagcaTCATCGAGTGCAGCGTTGATGaactcctagtaccttttttcgctagccgtatcaaaagctctgtctcctgtgcagcgagtgtgaggatttcgCCAGCGCTGCATTCGAtaatgtctttgatata	33	pab-MIR397,gma-MIR397a,gma-MIR397b,lja-MIR397,mtr-MIR397,ath-MIR397a,bna-MIR397a,bna-MIR397b,aly-MIR397a,aly-MIR397b,cme-MIR397,mes-MIR397,rco-MIR397,ssl-MIR397,lus-MIR397b,lus-MIR397a,tcc-MIR397,mdm-MIR397a,mdm-MIR397b,ppe-MIR397,csi-MIR397,ptc-MIR397a,ptc-MIR397b,nta-MIR397,vvi-MIR397a,bdi-MIR397a,bdi-MIR397b,hvu-MIR397,osa-MIR397a,osa-MIR397b,sbi-MIR397,zma-MIR397a,zma-MIR397b,	rco-MIR397	aaacaTCATTGAGTGCAGCGTTGATGaattcccctacatgacatatttctgttggttaattcattaccaatatcccttctttaaaaaaagaagtaaacctttttgggaatagatggttttggatgatttcaccagcgctgcattcaatcatgttttt	rco-MIR397-p3	ccagcgctgcattcaa	3'	80	7	7	0	4138	4138	0	4138	4138	0	0	y	...((((((..(((.((((((((((((((((..(((.((((..(((......(((((.((((...((.......)).....)).))))))))))..)))).)))..)))))))))))))))).)))..))))))...	4	0	0	-54.6	46	18
pda-miR397_2ss5TC20CT	pab-miR397_2ss5TC20CT	TCATCGAGTGCAGCGTTGATG	-	1695	1831	2	0	PDK_30s816511	21	137	-54.6	73	0	2	69	2	gp2a	33	783	783	0	gp2a	taaatcaaaagcaTCATCGAGTGCAGCGTTGATGaactcctagtaccttttttcgctagccgtatcaaaagctctgtctcctgtgcagcgagtgtgaggatttcgCCAGCGCTGCATTCGAtaatgtctttgatata	33	pab-MIR397,gma-MIR397a,gma-MIR397b,lja-MIR397,mtr-MIR397,ath-MIR397a,bna-MIR397a,bna-MIR397b,aly-MIR397a,aly-MIR397b,cme-MIR397,mes-MIR397,rco-MIR397,ssl-MIR397,lus-MIR397b,lus-MIR397a,tcc-MIR397,mdm-MIR397a,mdm-MIR397b,ppe-MIR397,csi-MIR397,ptc-MIR397a,ptc-MIR397b,nta-MIR397,vvi-MIR397a,bdi-MIR397a,bdi-MIR397b,hvu-MIR397,osa-MIR397a,osa-MIR397b,sbi-MIR397,zma-MIR397a,zma-MIR397b,	pab-MIR397	agccgtggcaaccacaTCATTGAGTGCAGCGTTGACGatagaaattccaccaatagatttgataatatctatctatttgtggaatgccattgatattgttaaccctgcactcaatagtatgtttgccaatggct	pab-miR397	TCATTGAGTGCAGCGTTGACG	5'	80	73	69	4	52478	49282	3196	52327	49282	3045	0	y	...((((((..(((.((((((((((((((((..(((.((((..(((......(((((.((((...((.......)).....)).))))))))))..)))).)))..)))))))))))))))).)))..))))))...	4	0	0	-54.6	46	18
pda-miR167d-p3_1ss4GA	aly-MIR167d-p3_1ss4GA	CATACATGTGTGTATATAT	+	4	85	1	0	PDK_30s874571	19	82	-35.4	2	0	0	2	0	gp2a	2	694	694	0	gp2a	tacatatacatacatgtacatgtatatgcgtacgtatacatacatgtatatgcgtacgtataCATACATGTGTGTATATATa	1	aly-MIR167d,	aly-MIR167d	gatctatatctatgctggtttttagaggcTGAAGCTGCCAGCATGATCTGGtaattgctacatacgacatacacacatatactagttaatttccacacctataaaagtttttttcctacaacttaaagcttttttccttcctctttttaataattagtgatctctagttctttgcctacttgtaatatatatttacggtggattcatgcatgtgtgtatatatatacatagtttacatgcatgcattttgtgtatgtgtgtgtgtatagatagtagtactAGGTCATCCTGCAGCTTCAGTcactaaatcaccaacaatatcaaatc	aly-MIR167d-p3	catgcatgtgtgtatatat	3'	2	2	2	0	1388	1388	0	1388	1388	0	0	y	...(((((((((((((((..(((((..(((((((((((.((....)).)))))))))))))))))))))))))))))))...	2	2	1	-35.4	33	17
pda-miR530_2ss18TC20TA	mtr-miR530_2ss18TC20TA	TGCATTTGCACCTGCACCTAC	+	8642	8764	2	0	PDK_30s935161	21	123	-50.2	495.5	21	5	462.5	7	gp2a	664	784	784	0	gp2a	tcagccatgatgtcttcaaatagcTGCATTTGCACCTGCACCTACagagaagggaggaaggaaaaatttgacaccttccctctaggtgcagtggctaatgcagccatatgccatcttggtgtc	23	ppt-MIR1030h,gma-MIR530a,gma-MIR530a,gma-MIR530e,gma-MIR530e,gma-MIR530c,gma-MIR530c,gma-MIR530b,gma-MIR530b,gma-MIR530d,gma-MIR530d,mtr-MIR530,mtr-MIR530,htu-MIR530,cme-MIR530a,mes-MIR530a,mes-MIR530b,lus-MIR530b,lus-MIR530a,tcc-MIR530a,tcc-MIR530b,aqc-MIR530,aqc-MIR530,ppe-MIR530,csi-MIR530a,csi-MIR530b,csi-MIR530b,ptc-MIR530a,ptc-MIR530b,ptc-MIR530b,stu-MIR530,osa-MIR530,	mtr-MIR530	agcttttatcTGCATTTGCACCTGCACTTTCcctggctgcgtctgtaacatataaacatgtgaattaatttgttttatatataaaataaaataaatttataatatttagtatgaggaaggaccaagggctaggtgcagatgcatatgcagatgaatgcc	mtr-miR530	TGCATTTGCACCTGCACTTTC	5'	987	495.5	478	17.5	380864	367242	13621.5	380400	367242	13157.5	0	y	...((((.((((....((.((.((((((((.((..((((((((.......((((.((((((............))))))))))))))))))..)).)))))))).)).)).)))).))))...	4	0	0	-50.2	40	16
pda-miR396b-p3_1ss11AT	cca-MIR396b-p3_1ss11AT	CAAAGGTTTATGTACAAA	-	72166	72288	1	0	gi|300388125|ref|NC_013991.2|	18	123	-29.1	1	0	1	0	0	gp2a	1	682	682	0	gp2a	tcatcagggttatgattcacCAACCTGCTAGTTCTTTTtatgaagcacaagcaggcgaatttatcctggaagcggaagaactactgaaacttcgcgaaaccctcaCAAAGGTTTATGTACAAA	3	mtr-MIR1510b,pvu-MIR319c,cca-MIR396b,	cca-MIR396b	ctatctTCCCACAGCTTTATTGAACTGcaaaggtttaagtacaaaaaaaaggacagatccaacagatcaacattgaaccatgcagttcaagaaagctgtggaagaacaga	cca-MIR396b-p3	caaaggtttaagtacaaa	3'	12	1	1	0	682	682	0	682	682	0	0	y	...(((((((...(((((.....((((((.((.((((....)))).)).)))))).))))).)))))))..(((((..............))))).(((((........))))).........	2	0	0	-29.1	24	12
pda-miR319c-p5_1ss13CT	pvu-MIR319c-p5_1ss13CT	CAACCTGCTAGTTCTTTT	-	72166	72288	1	0	gi|300388125|ref|NC_013991.2|	18	123	-29.1	11	0	2	9	0	gp2a	3	687	687	0	gp2a	tcatcagggttatgattcacCAACCTGCTAGTTCTTTTtatgaagcacaagcaggcgaatttatcctggaagcggaagaactactgaaacttcgcgaaaccctcaCAAAGGTTTATGTACAAA	3	mtr-MIR1510b,pvu-MIR319c,cca-MIR396b,	pvu-MIR319c	attttttccatggtcactctcattacaacctgctagtcctttttcgtctttacggttttcctttctttataactctgcttgctactcttgcatctcttcagcgcaggaatcgataaaaacatgccagaattagggtttctggtagccatgcttttcagttttagctctaaggaagaagggaaaaggatgtacatgtgcagagttcgactacagctttagtcacattgggaaggaaagagagtgaaggagcttccctcagcccattcatggatacaaaagattgggttgcaaaattaaccactaactcattcacacaatagtattcagttagggtgatgctctttttgctataatatgattgtgtgaatgaagtgatgcatacatattgtgtgaccctct…	pvu-MIR319c-p5	caacctgctagtcctttt	5'	12	11	11	0	6982	6982	0	6982	6982	0	0	y	...(((((((...(((((.....((((((.((.((((....)))).)).)))))).))))).)))))))..(((((..............))))).(((((........))))).........	2	0	0	-29.1	24	12
pda-miR157d-3p_1ss17TC	aly-miR157d-3p_1ss17TC	GCTCTCTATGCTTCTGCCATC	-	182624	182715	1	1	PDK_30s767921	21	92	-47	14	1	0	12	1	gp2a	11	742	705	1	gp2a	tgctgCTGACAGAAGATAGAGAGCACatatgatgagatgcatggtgcttcgcatctcactcctctgtGCTCTCTATGCTTCTGTCATCacct	103	smo-MIR156b,gma-MIR156m,gma-MIR156i,gma-MIR156e,gma-MIR156l,gma-MIR156r,gma-MIR156d,gma-MIR156b,gma-MIR156f,gma-MIR156u,gma-MIR156a,ahy-MIR156c,ahy-MIR156a,mtr-MIR156g,mtr-MIR156a,han-MIR156c,han-MIR156b,cca-MIR156b,har-MIR156a,hpa-MIR156a,ath-MIR157d,ath-MIR156j,ath-MIR156a,ath-MIR156b,ath-MIR156i,ath-MIR156c,bna-MIR156d,bna-MIR156e,aly-MIR157d,aly-MIR156a,aly-MIR156b,aly-MIR156c,cpa-MIR156e,cpa…	aly-MIR157d	atgttgtatgtatagtggagggtgatagtgtggttgcTGACAGAAGATAGAGAGCACtaaggatgatatgcaaaacacacacatatatgtgcttctaattgtatttcatacttaacatcaatgttgatgtgaatcgtgaaaaaaaaaaaagagagaagagctagaggagcatctgcatctctattcctatgtGCTCTCTATGCTTCTGTCATCacctttttttctctatttctctctacacattacatattcacat	aly-miR157d-3p	GCTCTCTATGCTTCTGTCATC	3'	1038	14	0.5	13.5	10434	385	10049	9964	385	9579	0	y	...((.(((((((((((((((((((((...((((((((((..........)))))))).))...)))))))))))).))))))))).))...	1	1	1	-47	33	20
pda-miR156g-5p_2ss13AG17GA	mtr-miR156g-5p_2ss13AG17GA	TTGACAGAAGATGGAGAGCAC	-	37243	37333	2	1	PDK_30s1168861	21	91	-48.6	12	2.5	0	8.5	1	gp2a	17	748	725	1	gp2a	tgctgTTGACAGAAGATAGAGAGCACagatgatgacatgcaaggccctttgcatctcattcctttgtGCTCTCTATGCTTCTGTCATCacc	7	mtr-MIR156g,han-MIR156c,cme-MIR156e,bcy-MIR156,ppe-MIR156h,ptc-MIR156l,vvi-MIR156f,	mtr-MIR156g	ggttgTTGACAGAAGATAGAGGGCACtaaggatgatatgcatacacatatatatacaacatggaggaggagcttaattgcatttcatttcctttgtGCTCTCTAGACTTCTGTCATCacc	mtr-miR156g-5p	TTGACAGAAGATAGAGGGCAC	5'	26	12	0	12	9146	0	9146	8848.5	0	8848.5	0	y	...((.(((((((((((((((((((((((.(((((.(((((((....))))))).)))))..)))))))))))))).))))))))).))..	1	1	1	-48.6	37	20
pda-miR168a_1ss21AT	gma-miR168a_1ss21AT	TCGCTTGGTGCAGGTCGGGAT	-	3345	3508	1	1	PDK_30s715151	21	164	-90.6	22	1	1.5	17.5	2	gp2a	12	788	748	1	gp2a	ttagcgttcttactcgccaccttctcgaatTCGCTTGGTGCAGGTCGGGAAccgatccgggccgttctccccgacgacgacgcgatcaggtgcgtcctttctggcggacgcggttccccacttgcaccaagtgaattggagaagctgtggcgaaaggaagcccc	41	gma-MIR168a,gma-MIR168b,mtr-MIR168b,mtr-MIR168c,vun-MIR168,cca-MIR168a,ath-MIR168a,ath-MIR168b,bna-MIR168a,bna-MIR168b,aly-MIR168b,aly-MIR168a,cme-MIR168,mes-MIR168a,rco-MIR168,lus-MIR168b,lus-MIR168a,tcc-MIR168,mdm-MIR168b,mdm-MIR168a,ppe-MIR168,crt-MIR168,ccl-MIR168,ptc-MIR168a,ptc-MIR168b,sly-MIR168b,sly-MIR168a,nta-MIR168d,nta-MIR168e,nta-MIR168a,nta-MIR168c,nta-MIR168b,vvi-MIR168,bdi-MIR168,…	gma-MIR168b	cggtctctaatTCGCTTGGTGCAGGTCGGGAAccggttttcgcgcggaatggaggaacggtcgccggcggcgaattggatcccgccttgcatcaactgaatcggaggccg	gma-miR168a	TCGCTTGGTGCAGGTCGGGAA	5'	44	22	2.5	19.5	16472	2051.5	14420.5	15743.5	2051.5	13692	0	y	...((.(((((..(((((((((((((.((((((((((((((((((.((((((((.((((...((((......))))..((((((......))))))........))))..)))))))).)))))))))))))))))).))))))..)))))))))))).))...	2	0	0	-90.6	50	20
pda-miR530_2ss18TC20TA	mtr-miR530_2ss18TC20TA	TGCATTTGCACCTGCACCTAC	+	59903	60002	2	0	PDK_30s1052711	21	100	-40.3	492.5	21	5	459.5	7	gp2a	664	784	784	0	gp2a	ttcatatagtTGCATTTGCACCTGCACCTACagagaagagcgaaagaagatgttcattagtcccttcctctaggtgcagtggcagaagcagccatatgcc	23	ppt-MIR1030h,gma-MIR530a,gma-MIR530a,gma-MIR530e,gma-MIR530e,gma-MIR530c,gma-MIR530c,gma-MIR530b,gma-MIR530b,gma-MIR530d,gma-MIR530d,mtr-MIR530,mtr-MIR530,htu-MIR530,cme-MIR530a,mes-MIR530a,mes-MIR530b,lus-MIR530b,lus-MIR530a,tcc-MIR530a,tcc-MIR530b,aqc-MIR530,aqc-MIR530,ppe-MIR530,csi-MIR530a,csi-MIR530b,csi-MIR530b,ptc-MIR530a,ptc-MIR530b,ptc-MIR530b,stu-MIR530,osa-MIR530,	mtr-MIR530	agcttttatcTGCATTTGCACCTGCACTTTCcctggctgcgtctgtaacatataaacatgtgaattaatttgttttatatataaaataaaataaatttataatatttagtatgaggaaggaccaagggctaggtgcagatgcatatgcagatgaatgcc	mtr-miR530	TGCATTTGCACCTGCACTTTC	5'	984	492.5	476.5	16	378896	366538	12358.5	378480	366538	11942.5	0	y	..(((((.(((((.(((((..(((((((((.((.((((.((....(((....)))....))..)))))).)))))))))..))))).))))).)))))..	4	0	0	-40.3	35	17
pda-miR6432-p3_1ss9TG	ptc-MIR6432-p3_1ss9TG	AGATGGGTGTAGGGTTA	-	17791	17941	1	0	PDK_30s889281	17	151	-58.2	17	2	2	13	0	gp2a	11	630	630	0	gp2a	TTCGGGAGATGGATTccgattcgcccgcccgccgcttctccgatcggcggcgagggctcttcaaccactccctaaactgattagaggcgtttaaagcccttgcctcttccacaAGATGGGTGTAGGGTTAcgctcgcctctatattgtaaa	4	mtr-MIR2658,lus-MIR166j,ptc-MIR6432,osa-MIR319a,	ptc-MIR6432	ggcggCGGCTCTAGAGAAAAAGATGGgtttagggttaggtattttttgtattttttttttgatgttgtcaaaattcccccccctcttttgtttgagttgtggacc	ptc-MIR6432-p3	AGATGGgtttagggtta	3'	21	17	17	0	10743	10743	0	10743	10743	0	0	n	...(((((.(((.....((...((((..((((((.((....)).))))))...))))...))..))))))))...((....((((((((.....((((((.(((((.((.....)).))).)))))))).....))))))))....))...	1	1	1	-58.2	22	8
pda-miR166j-p5_1ss13GA	lus-MIR166j-p5_1ss13GA	TTCGGGAGATGGATT	-	17791	17941	1	0	PDK_30s889281	15	151	-58.2	4	0	0	4	0	gp2a	3	522	522	0	gp2a	TTCGGGAGATGGATTccgattcgcccgcccgccgcttctccgatcggcggcgagggctcttcaaccactccctaaactgattagaggcgtttaaagcccttgcctcttccacaAGATGGGTGTAGGGTTAcgctcgcctctatattgtaaa	4	mtr-MIR2658,lus-MIR166j,ptc-MIR6432,osa-MIR319a,	lus-MIR166j	aggggaatgttgtctggcccgaagcctctattgacaatggccgaagatcaaattcgggagatgggtttagcgactTCGGACCAGGCTTCATTCCCC	lus-MIR166j-p5	ttcgggagatgggtt	5'	21	4	4	0	2070	2070	0	2070	2070	0	0	n	...(((((.(((.....((...((((..((((((.((....)).))))))...))))...))..))))))))...((....((((((((.....((((((.(((((.((.....)).))).)))))))).....))))))))....))...	1	1	1	-58.2	22	8
pda-miR169_1ss20TG	pde-miR169_1ss20TG	CAGCCAAGGATGACTTGCCGA	+	17994	18172	1	0	PDK_30s664611	21	179	-85.3	1742.5	58.5	0	1681.5	2.5	gp2a	2872	780	780	0	gp2a	ttctcatctatggattcaccttgggctcaggaagtatggtgCAGCCAAGGATGACTTGCCGAcccttcgatagaattttctcttgtgcctcctttggaggaattttagagaaagaggctGGCAAGTTGTCTTTGGCTAcatcttatttcctgctcctgatgtgaggcctgtgatgatac	107	pde-MIR169,gma-MIR169b,gma-MIR169g,gma-MIR169v,gma-MIR169f,gma-MIR169u,gma-MIR169a,gma-MIR169m,gma-MIR169l,gma-MIR169p,gma-MIR169c,mtr-MIR169a,mtr-MIR169g,mtr-MIR169b,mtr-MIR169l,vun-MIR169,ath-MIR169a,ath-MIR169b,ath-MIR169c,ath-MIR169d,ath-MIR169e,bna-MIR169b,bna-MIR169a,bna-MIR169n,aly-MIR169a,aly-MIR169c,aly-MIR169b,aly-MIR169e,aly-MIR169d,cme-MIR169h,cme-MIR169f,mes-MIR169g,mes-MIR169c,mes-M…	pde-MIR169	actatttattCAGCCAAGGATGACTTGCCTAgatcttgttaccagtatcggctagttatgctgatatcgatttcagtcactaggtgagtcgtccttggctaaa	pde-miR169	CAGCCAAGGATGACTTGCCTA	5'	3772	1742.5	1719.5	23	1344819	1.3267e+06	18119.5	1344116	1.3267e+06	17416.5	0	y	...(((((...((..((((.(..((..(((((((((.((((.(((((((((..(((((((..((.(((....))).(((((((....(((((...)))))......)))))))..))..)))))))..))))))))).)))).)))))))))..))..).))))..))...)))))...	4	0	0	-85.3	45	16
pda-miR5141-p3_1ss6TC	rgl-MIR5141-p3_1ss6TC	TAGCTCTCAACTGAGCGGCAGACCCGACGCGACTGACA	-	1240	1401	1	0	M01000056222	38	162	-37.1	11	4	2	5	0	gp1b	1	1480	1480	0	gp1b	ttgagtaatgcctgagtcgcagcatcaaggtctgacccaaattgagcgaaggcggccacttcgcgataTTGTGCCAATTCCAGTTTTAAACTaccgcagacttgtttcaTAGCTCTCAACTGAGCGGCAGACCCGACGCGACTGACAgataagccaacgtta	1	rgl-MIR5141,	rgl-MIR5141	ttgagtaatgcctgagtcgcagcatcaaggtctgagccaaattgagcaaaggcggccacttcgcgatattgtgccaattccagttttgaactaccgcatacttgtttcatagctttcaactgagcggcAGACCCGACGCGACTGACAGATAAgccgacgtta	rgl-MIR5141-p3	tagctttcaactgagcggcAGACCCGACGCGACTGACA	3'	18	11	7	4	9940	7156	2784	9784	7156	2628	0	n	...........(((((((((....((..((((((.((.((((((.((((((.......))))))...((((...))))..)))))).........................((((......)))))))))))).)).))))))..)))..............	0	0	0	-37.1	6	13
pda-miR4241-p3_1ss4TG	aly-MIR4241-p3_1ss4TG	TCAGTCGATGTAAGAAAT	-	341	445	1	0	M01000042451	18	105	-61.4	2	0	0	2	0	gp2a	2	656	656	0	gp2a	ttgctctttccaccctgtgctccccatttgttgtccatctgagcttggttttgtaaggtctcTCAGTCGATGTAAGAAATggggagcacagggtggaaagaggct	1	aly-MIR4241,	aly-MIR4241	gaacgaactaaacctcattcgatgtaagaaatcccaaaaaggacagggttcataaacattcgctctatggcccatgataatgttgagtctgctacgtgacttacatttttgtcgggcagatcacgccaatacacacctggtctCTTTGGGATTTTCTTACAGCGAatgaggtttagttccatctc	aly-MIR4241-p3	tcattcgatgtaagaaat	3'	2	2	2	0	1312	1312	0	1312	1312	0	0	y	...((((((((((((((((((((((((((.(((((...(((((((((......))))....)))))..)))..)).))))))))))))))))))))))))))...	5	2	2	-61.4	40	13
pda-miR156h-p3_1ss11AT	gma-MIR156h-p3_1ss11AT	TTGCGTGCTCTCTTCTCTTTC	+	208235	208332	1	0	PDK_30s839411	21	98	-51.2	13.5	0.5	0.5	12.5	0	gp2a	7	744	744	0	gp2a	ttgggggCTGACAGAAGAGAGTGAGCAcacagcgaggcaattgcatcagggaatgccgttcccgTTGCGTGCTCTCTTCTCTTTCtgtcaaccctccg	170	ppt-MIR156b,ppt-MIR156c,ppt-MIR156a,smo-MIR156a,smo-MIR156b,gma-MIR156h,gma-MIR156v,gma-MIR156a,gma-MIR156x,gma-MIR156o,gma-MIR156q,gma-MIR156s,gma-MIR156u,gma-MIR156w,gma-MIR156y,gma-MIR156k,gma-MIR156n,mtr-MIR156i,mtr-MIR156c,mtr-MIR156d,mtr-MIR156b,vun-MIR156a,han-MIR156b,han-MIR156a,htu-MIR156a,cca-MIR156a,cca-MIR156b,har-MIR156a,hci-MIR156a,ath-MIR156e,ath-MIR156a,ath-MIR156d,ath-MIR156f,ath…	gma-MIR156h	cttagaaatTGACAGAAGAGAGTGAGCACacagaagcacttggtatagttatatactgttgcttttgcgtgctcacttctctttctgtca	gma-MIR156h-p3	ttgcgtgctcacttctctttc	3'	1687	13.5	10.5	3	10572.5	8225.5	2347	10466	8225.5	2240.5	0	y	..(((((.(((((((((((((.((((((.(((((.((.((..((((......))))..))))))))).)))))).).)))).)))))))).))).)).	2	1	2	-51.2	37	18
pda-miR394a-5p_1ss8TG	gma-miR394a-5p_1ss8TG	TTGGCATGCTGTCCACCTCC	-	7977	8134	1	0	PDK_30s801231	20	158	-67.7	966.5	63	38.5	853	12	gp2a	904	737	737	0	gp2a	ttgtcatgtggatttatcaaagggtctcttacagaggtcaTTGGCATGCTGTCCACCTCCaaatcctctatctagacggccaaaggggaagagaaatggaggtgggcatcctgccaactgAGCTCTGTTGGCTTCTCTTTGcaaaacccatatgaaag	47	gma-MIR394g,gma-MIR394d,gma-MIR394f,gma-MIR394b,gma-MIR394e,gma-MIR394a,gma-MIR394c,ahy-MIR394,cca-MIR394,ath-MIR394b,ath-MIR394a,bna-MIR394b,bna-MIR394a,aly-MIR394b,aly-MIR394a,cpa-MIR394b,cpa-MIR394a,cme-MIR394a,cme-MIR394b,mes-MIR394c,mes-MIR394a,mes-MIR394b,ssl-MIR394,lus-MIR394b,lus-MIR394a,ghr-MIR394b,ghr-MIR394a,tcc-MIR394a,tcc-MIR394b,mdm-MIR394b,mdm-MIR394a,ppe-MIR394a,ppe-MIR394b,csi-MI…	gma-MIR394c	cagagtttcTTGGCATTCTGTCCACCTCCacttccactttcagttccatggatctctctctctttttggccctatctacgtactcggaggtggacatactgccaatagag	gma-miR394a-5p	TTGGCATTCTGTCCACCTCC	5'	994	966.5	963.5	3	709230	707124	2106	709164	707124	2039	0	y	...((((((((.(((..(((((((...(..((((((.(((((((((...((((((((((((....((((..((............))..))))...))))))))))))...)))))).))).))))))..)...)))))))..))).))))))))...	6	0	0	-67.7	52	17
pda-miR482-p3_1ss9TA	gra-MIR482-p3_1ss9TA	TTTCCAATACCTCCCATT	-	120	258	1	0	PDK_30s921011	18	139	-64.3	647	25	45	553	24	gp2a	149	661	661	0	gp2a	tttatttgaagctattggagtggggatggtgtggaatatcttcttttccctgagtttttttttctttctatcgtcgaaaaaagaggctctgggtttgaagtatTTTCCAATACCTCCCATTccaatggcttcaagtttc	18	gma-MIR482c,gma-MIR482a,pvu-MIR482,vun-MIR482,pgi-MIR482a,pgi-MIR482b,gra-MIR482,mdm-MIR482a,ppe-MIR482a,ptc-MIR482b,sly-MIR482a,nta-MIR482c,nta-MIR482a,stu-MIR482b,stu-MIR482a,osa-MIR2118r,osa-MIR2118e,	gra-MIR482	gaaggaggaaaaggagagaccgtttctggaaattttcggaatggaggagttggaaagattttgaattttctctgtattttaataatgaaaaaTCTTTCCAATTCCTCCCATTCCactgatttccagcacttcctctccattttcttaccttt	gra-MIR482-p3	TTTCCAATTCCTCCCATT	3'	647	647	624	23	444594	428745	15849	443752	428745	15007	0	y	...((((((((((((((((((((((..(((((((((.((((((....(((.(((((((((((((...........))))))))).)))).)))...)))).)).)))).)))))))))))))))))))))))))))...	2	2	2	-64.3	53	16
pda-miR397-p3_1ss6GA	tcc-MIR397-p3_1ss6GA	CCAGCACTGCACTCAATCATG	+	1629	1752	1	0	PDK_30s786161	21	124	-52.9	25.5	0	1	24.5	0	gp2a	17	761	761	0	gp2a	tttgagatcaaaagcaTCATTGAGTGCAGCGTTGATGaaactctgcatcctgttgggcgatccatcgcaccaaaggtttgaggaattcaCCAGCACTGCACTCAATCATGtctttgatatccca	33	pab-MIR397,gma-MIR397a,gma-MIR397b,lja-MIR397,mtr-MIR397,ath-MIR397a,bna-MIR397a,bna-MIR397b,aly-MIR397a,aly-MIR397b,cme-MIR397,rco-MIR397,ssl-MIR397,dpr-MIR397,lus-MIR397b,lus-MIR397a,tcc-MIR397,mdm-MIR397a,mdm-MIR397b,ppe-MIR397,csi-MIR397,ptc-MIR397a,ptc-MIR397b,sly-MIR397,nta-MIR397,stu-MIR397,vvi-MIR397a,bdi-MIR397a,bdi-MIR397b,osa-MIR397a,osa-MIR397b,sbi-MIR397,zma-MIR397b,	tcc-MIR397	attcccagatggaagacacaTCATTGAGTGCAGCGTTGATGaattctttcactttttgccaactctatctcagatgaattcgccagcgctgcactcaatcatgtgttttgctctttctggaaa	tcc-MIR397-p3	ccagcgctgcactcaatcatg	3'	247	25.5	24.5	1	18015	17339	676	17975	17339	636	0	y	...((.((((((..(((.(((((((((((.((((.((((..(((.((.(((.((((((((....)))).)))))))..)))))..)))).)))).))))))))))).)))..)))))).))...	2	0	0	-52.9	46	18
pda-miR397_1ss20CT	pab-miR397_1ss20CT	TCATTGAGTGCAGCGTTGATG	+	1629	1752	1	0	PDK_30s786161	21	124	-52.9	98	0.5	16.5	57	24	gp2a	139	777	777	0	gp2a	tttgagatcaaaagcaTCATTGAGTGCAGCGTTGATGaaactctgcatcctgttgggcgatccatcgcaccaaaggtttgaggaattcaCCAGCACTGCACTCAATCATGtctttgatatccca	33	pab-MIR397,gma-MIR397a,gma-MIR397b,lja-MIR397,mtr-MIR397,ath-MIR397a,bna-MIR397a,bna-MIR397b,aly-MIR397a,aly-MIR397b,cme-MIR397,rco-MIR397,ssl-MIR397,dpr-MIR397,lus-MIR397b,lus-MIR397a,tcc-MIR397,mdm-MIR397a,mdm-MIR397b,ppe-MIR397,csi-MIR397,ptc-MIR397a,ptc-MIR397b,sly-MIR397,nta-MIR397,stu-MIR397,vvi-MIR397a,bdi-MIR397a,bdi-MIR397b,osa-MIR397a,osa-MIR397b,sbi-MIR397,zma-MIR397b,	pab-MIR397	agccgtggcaaccacaTCATTGAGTGCAGCGTTGACGatagaaattccaccaatagatttgataatatctatctatttgtggaatgccattgatattgttaaccctgcactcaatagtatgtttgccaatggct	pab-miR397	TCATTGAGTGCAGCGTTGACG	5'	247	98	83.5	14.5	74995	63800.5	11194.5	74467	63800.5	10666.5	0	y	...((.((((((..(((.(((((((((((.((((.((((..(((.((.(((.((((((((....)))).)))))))..)))))..)))).)))).))))))))))).)))..)))))).))...	2	0	0	-52.9	46	18
pda-miR156i-3p_2ss7CT22TG	mtr-miR156i-3p_2ss7CT22TG	TGCTCATTTCTCTTTCTGTCAGC	+	12219	12344	2	1	PDK_30s655941	23	126	-62	1302.5	206.5	52	976.5	67.5	gp2a	682	860	824	1	gp2a	tttggctggcttgctgacttgggCTGACAGAAGAGAGTGAGCACacgccggcgatggcagcatgaagggatgctgttcccgttgcgTGCTCACTTCTCTTTCTGTCAGCttcccttgcctgctcta	163	ppt-MIR156b,ppt-MIR156c,ppt-MIR156a,smo-MIR156a,gma-MIR156a,gma-MIR156u,gma-MIR156h,gma-MIR156v,gma-MIR156x,gma-MIR156o,gma-MIR156q,gma-MIR156s,gma-MIR156w,gma-MIR156y,gma-MIR156k,gma-MIR156n,mtr-MIR156i,mtr-MIR156c,mtr-MIR156d,mtr-MIR156b,mtr-MIR156j,vun-MIR156a,han-MIR156b,han-MIR156a,htu-MIR156a,cca-MIR156a,cca-MIR156b,har-MIR156a,hci-MIR156a,ath-MIR156a,ath-MIR156b,ath-MIR156c,ath-MIR156e,ath…	mtr-MIR156i	gatatTGACAGAAGAGAGTGAGCACatgctgcagtgattgtatgatagcatacaattcttggtgcgTGCTCACTTCTCTTTCTGTCATCttat	mtr-miR156i-3p	TGCTCACTTCTCTTTCTGTCATC	3'	28129	1302.5	575.5	727	1.0975e+06	475887	621612	1071464	475887	595577	0	y	...(((.(((.....((....(((((((((((((((((((((((.(..(((.((..(((((((......))))))))))))..).)))))))).)))).)))))))))))))....))).)))...	1	1	2	-62	44	21
pda-miR4376-p5_1ss2AT	sly-MIR4376-p5_1ss2AT	TTCGCAGGAGAGATGATGCT	+	4080	4170	1	1	PDK_30s1122511	20	91	-59.9	6	0	0	5	1	gp2a	3	734	701	1	gp2a	tttgggatcctctGTCGCAGGAGAGATGATGCTtgctatggtttgtatcaccaggagcaagtctcatctctcctcgacagaggaaccctct	4	mtr-MIR5225a,ppe-MIR5225,sly-MIR4376,stu-MIR4376,	sly-MIR4376	aaggcttgctACGCAGGAGAGATGATGCTGGAcgatagagaaaatgggatttaatttattggccagcatcatactcctgcatattaagcct	sly-MIR4376-p5	tACGCAGGAGAGATGATGCT	5'	11	6	1.5	4.5	4123.5	994.5	3129	3976.5	994.5	2982	0	y	...(((.((((((((((.(((((((((((..((((((.((((.......))))..))))))..))))))))))))))))))))).)))...	4	1	1	-59.9	34	17
pda-miR535_1ss12GA	pab-miR535_1ss12GA	TGACAACGAGAAAGAGCACGC	+	6595	6705	1	0	PDK_30s715261	21	111	-56.8	3	0.5	0	2	0.5	gp2a	3	736	736	0	gp2a	tttgtggggagaactggggTGACAACGAGAAAGAGCACGCtagtacacagccatggcaccttgcatgactgccgaccggcgtgctctctctcgttgtcagccaaccacgcc	13	pab-MIR535,ppt-MIR535c,ppt-MIR535d,ppt-MIR535a,ppt-MIR535b,cpa-MIR535,rco-MIR535,aqc-MIR535,mdm-MIR535a,ppe-MIR535a,vvi-MIR535a,vvi-MIR535c,osa-MIR535,	pab-MIR535	aaatatccgttctattccattgcTGACAACGAGAGAGAGCACGCctgtattctcttatatgaattttgcatatgtgggcgtccatgcgtgctctctgcttgtagtcagcaaagcgactgcatctcaact	pab-miR535	TGACAACGAGAGAGAGCACGC	5'	6	3	1.5	1.5	2212	1104	1108	2156	1104	1052	0	y	...((((.........((.(((((((((((.(((((((((..((...(((.((((........)))).)))...))..))))))))).))))))))))).))..))))...	2	0	0	-56.8	35	20
pda-miR394a-5p_1ss19CT	gma-miR394a-5p_1ss19CT	TTGGCATTCTGTCCACCTTC	-	8517	8707	1	0	PDK_30s918941	20	191	-83.9	85	0	1	82	2	gp2a	82	751	751	0	gp2a	ttttattgtggttgtcatgtgggtttatcaaagggtatcttacagaggtcaTTGGCATTCTGTCCACCTTCaaattctctgcttcttatcttatatgcaaagaggaagaaaaatggAGGTGGGCATCCTGCCAACCGatctctgttggcttctctttgtaaaacccacatgatagaatttctcccatagtg	47	gma-MIR394g,gma-MIR394d,gma-MIR394f,gma-MIR394b,gma-MIR394e,gma-MIR394a,gma-MIR394c,ahy-MIR394,cca-MIR394,ath-MIR394b,ath-MIR394a,bna-MIR394b,bna-MIR394a,aly-MIR394b,aly-MIR394a,cpa-MIR394b,cpa-MIR394a,cme-MIR394a,cme-MIR394b,mes-MIR394c,mes-MIR394a,mes-MIR394b,ssl-MIR394,lus-MIR394b,lus-MIR394a,ghr-MIR394b,ghr-MIR394a,tcc-MIR394a,tcc-MIR394b,mdm-MIR394b,mdm-MIR394a,ppe-MIR394a,ppe-MIR394b,csi-MI…	gma-MIR394c	cagagtttcTTGGCATTCTGTCCACCTCCacttccactttcagttccatggatctctctctctttttggccctatctacgtactcggaggtggacatactgccaatagag	gma-miR394a-5p	TTGGCATTCTGTCCACCTCC	5'	87	85	84	1	63634	62988	646	63593	62988	605	0	y	...(((((((((((((((((((((((..(((((((...(..(((((((((.((((((...((((((((((((.....(((.((((((............)))))).)))....))))))))))))...))))))..)))))))))..)...)))))))..)))))))))))))))........))))))))	6	0	0	-83.9	67	17
[truncated: 8 more columns]
