# Supplementary material for: A genome-wide identification of the miRNAome in response to salinity stress in date palm (Phoenix dactylifera L.)
Source: Front Plant Sci. 2015 Nov 5;6:946. doi: 10.3389/fpls.2015.00946 (PMC4633500; doi:10.3389/fpls.2015.00946)
Supplement: Supplementary file 3 [file Table3.XLSX]

## Sheet: Sheet1
	Table S3. Predicted novel miRNA sequences identified from P. dactylifera leaves and roots and their corresponding precursors.
Index	MicrRNA	Mattre Seqtence (5’-3’)	strand	start	end	on genome	Length of the mattre miRNA	Length of the prectrsor	Minimal folding free energy	Cotnt in the combined library	Control-Leaves	Control-Root	NaCl-Leaves	NaCl-Root	grotp	len	#copy of the miRNA	score(all) of the miRNA	score(mapped) of the miRNA	#error of the miRNA	grotp	genomeID	strand	start	end	genome_seq	type	#reads(all for cltster)	#reads(all)	#reads(0err)	#reads(>0err)	score(all)	score(0err)	score(>0err)	score(mapped)	score(mapped,0err)	score(mapped,>0err)	#base_inLoop	flag	SS	#maxError(a spot in mattre region)	#maxBiasedError (in mattre region)	#biasedBtlge (in mattre region)	dG	#bp (in stem)	#bp (in mattre region)	%mattreCovered	hairpinLen	loopLen
R	pda-3p-217326_31-R4	UUCGAACGAAACAGGAGACUCGCC	-	6038	6191	1	R	154	-97.765	15.5	5.5	0	10	0	gp4a	R	31	902	864	1	gp4a	PDK_30s980031	-	6038	6191	aaaaaacaaggcgagUcUccUgUUUcgUUcgaaaUaggagUcaggcccUUUUUUUaUUUUgcaaaUcgcUUaccgacUUcacUUaaaaaUcacaaaaUaaaaaaagggccUgacUccUgUUUCGAACGAAAUAGGAGACUCGCCcUgUUUUccg	3'	31	15.5	0	15.5	13981	0	13981	13392	0	13392	0	y	..((((((.((((((((((((((((((((((((((((((((((((((((((((((((((((...............................)))))))))))))))))))))))))))))))))))))))))))))))))))).))))))...	0	0	0	-97.765	58	24	100	149	31
511	pda-5p-323301_17	AAAAAAGCGUCGUCGCUCUAUGCC	+	2598	2696	0	24	99	-51.2	17	2	0	14	1	gp4a	24	17	893	893	0	gp4a	PDK_30s892281	+	2598	2696	AAAAAAGCGUCGUCGCUCUAUGCCgacgcUUUUaagcgUcgaUcaUUUUaUacaaacccgacgcUUaaaagUgUcggcgUacUUgaaccgacgcUUgcc	5'	17	17	17	0	15181	15181	0	15181	15181	0	0	y	....(((((((((((...(((((((((((((((((((((((.................)))))))))))))))))))))))..)))..))))))))...	5	2	2	-51.2	34	17	83	92	17
371	pda-5p-15197_1588	UCACAGGCUUUCUUGAACUA	+	41120	41243	0	20	124	-56.9	2041	231	101	1675	34	gp4a	20	1588	743	743	0	gp4a	PDK_30s1094891	+	41120	41243	aacaagaUUcUggacaUgUcUUCACAGGCUUUCUUGAACUAUgaacUUgUUUgggUUUaUcgcaagaaccgcaccaaUggUUgaUagUUCAAGAAAGUCAGUGGAAGacaUgacagaUcUUcaU	5'	2727	2041	1617	424	1552583	1206676	345907	1532390	1206676	325714	0	y	...((((.((((..(((((((((((.((((((((((((((((.((((...((((((...((....))...)).)))).)))).)))))))))))))))).))).)))))))).))))))))...	2	1	1	-56.9	47	19	100	118	4
233	pda-3p-44090_382	UUCAAGAAAGUCAGUGGAAG	+	41120	41243	0	20	124	-56.9	686	76	69	499	42	gp4a	20	382	737	737	0	gp4a	PDK_30s1094891	+	41120	41243	aacaagaUUcUggacaUgUcUUCACAGGCUUUCUUGAACUAUgaacUUgUUUgggUUUaUcgcaagaaccgcaccaaUggUUgaUagUUCAAGAAAGUCAGUGGAAGacaUgacagaUcUUcaU	3'	2727	686	410	276	514469	304466	210003	503899	304466	199433	0	y	...((((.((((..(((((((((((.((((((((((((((((.((((...((((((...((....))...)).)))).)))).)))))))))))))))).))).)))))))).))))))))...	2	1	1	-56.9	47	19	100	118	4
630	pda-5p-131814_68	AACAAAAGGCUUCUGUUCGGC	-	40742	40828	1	21	87	-48.6	68	11	3	46	8	gp4a	21	68	788	751	1	gp4a	PDK_30s919691	-	40742	40828	AACAGAAGGCUUCUGUUCGGCgaUccagUgccgaaCAGAAGGCUUCUGUUCGGCAACccUcaaccgaacagaaUccUUcUgUUcggc	5'	109	68	0	68	53584	0	53584	51068	0	51068	0	y	(((((((((.((((((((((........((((((((((((...))))))))))))........)))))))))).)))))))))....	2	0	0	-48.6	19	19	95	83	43
121	pda-3p-231836_28	CAGAAGGCUUCUGUUCGGCACC	-	40742	40828	1	22	87	-48.6	41	6	2	31	2	gp4a	22	28	827	788	1	gp4a	PDK_30s919691	-	40742	40828	AACAGAAGGCUUCUGUUCGGCgaUccagUgccgaaCAGAAGGCUUCUGUUCGGCAACccUcaaccgaacagaaUccUUcUgUUcggc	3'	109	41	0	41	34804	0	34804	33244	0	33244	0	y	(((((((((.((((((((((........((((((((((((...))))))))))))........)))))))))).)))))))))....	2	0	0	-48.6	19	19	95	83	43
216	pda-3p-296860_19	AGUCGACUCCAGAUCUGUACGAGU	+	11176	11304	1	24	129	-61.2	19	6	1	12	0	gp4a	24	19	903	863	1	gp4a	PDK_30s718941	+	11176	11304	aaccUUcagcaaggUcaggagUcgacUccgggagacUUggagUcaacUcUggcgcgcaggcagacUUcgcacagUUUUUUagAGUCGACUCCAGAUCUGUAGGAGUcgacUcccaUggUgUUggagUcg	3'	19	19	0	19	17157	0	17157	16397	0	16397	0	y	...((((((((..((..((((((((((((...(((..(((((((.(((((((((((.((.....)).)))...))....)))))).)))))))..)))...)))))))))))).))..))))))))...	6	0	0	-61.2	45	18	100	123	5
29	pda-5p-271611_22	AGCUAGAUCGGUCCUUCAUCGACU	-	193218	193461	1	24	244	-105.7	60	14	6	38	2	gp4a	24	22	889	850	1	gp4a	PDK_30s710451	-	193218	193461	aacUUggcUUgggaggaUaUgaUccgaUaUaggaUgaUaaUcUUaagUaaaaggggUaUUcUaaUaUgUccaggaUUUccacUcaacacaUcaccUcaUcAGCUAGAUCGGUCCUGCAUCGACUaccUcUaggUcccUUUgcUUcaUUcacUggUUagUUcUagUUUgagUaUggaaUgcaggaUagagaccacggacaUaaagcaccUagaggUagUcgaUgaaggaccgaUcUagcUgaUga	5'	60	60	25	35	53155	22313	30842	51777	22313	29464	0	y	....((..(((((.(((...(((((....((((((....))))))........((..((......))..)).)))))))).)))))..)).....((((((((((((((((((((.((((((((((((((((((......((((.((((..(((((.(((((.((((.......))))..)))))...)))))..)).)).)))))))))))))))))))))).))))))))))))))))))))	2	0	0	-105.7	60	23	100	149	7
134	pda-5p-136470_65	AAGAAAGCGUCGGCCAUGUAUGGC	-	455	553	1	24	99	-53.2	65	7	0	55	3	gp4a	24	65	904	864	1	gp4a	PDK_30s702111	-	455	553	AAGAAAGCGUCGGCCAUGUAUGCCgacgcUUUUaagcgUcgUUcaUcUgcgaggUaaccgacgUUUaaaagcUccggcUaaUaUggaccgacgcUUgaa	5'	65	65	0	65	58760	0	58760	56160	0	56160	0	y	....(((((((((((((((..((((..((((((((((((((...(((.....)))...))))))))))))))..))))..)))))).)))))))))...	4	1	1	-53.2	36	18	83	92	5
784	pda-5p-303859_18	AAGGGACCUAUUCAAGAAAGGAGC	-	59589	59743	0	24	155	-96.9	18	3	0	15	0	gp4a	24	18	887	887	0	gp4a	PDK_30s1090851	-	59589	59743	aagaUUaaUgUAAGGGACCUAUUCAAGAAAGGAGCaaaUagUUUgcUgccacaUaaUgaacUgcaUaUgUUgUUgaUcUgUggUaUaUUcaUacgcagUUcaUcaUgUggcagcaaacUaUUUgcccUUUUcUUgaaaaggUcccUUacaUUaaU	5'	18	18	18	0	15966	15966	0	15966	15966	0	0	y	...(((((((((((((((((.(((((((((((.(((((((((((((((((((((.(((((((((.((((......((.....)).....)))).))))))))).))))))))))))))))))))).))))))))))).)))))))))))))))))	2	0	0	-96.9	64	22	100	152	5
810	pda-5p-55341_272	ACCGUAGACUUAUGAUGAAAUUCA	+	270	427	0	24	158	-76.5	344.5	180.5	23	85	56	gp4a	24	272	897	897	0	gp4a	PDK_30s1000001	+	270	427	aaggagaaaUUaUUaggUgggcUaggUccACCGUAGACUUAUGAUGAAAUUCAUccUagcgUacaUUgcUaUUacacaUaaaaagaaagacgUaggaaaUggggaUgaaUUUcaUcUUaggUccacggUgaaUcUggUccaccUaaUaaUUUUUUggU	5'	351	344.5	344.5	0	305388	305388	0	305388	305388	0	0	y	...((((((((((((((((((((((((.((((((.((((((.(((((((((((((((((((.....)))).((((................))))......))))))))))))))).)))))).)))))).))))))))))))))))))))))))...	2	0	0	-76.5	51	22	100	152	44
944	pda-5p-376037_14	UUUGCUAAUUUCACUUACGAAUCGUCUUA	-	290	453	0	29	164	-83	24	18	0	4	2	gp4a	29	14	1093	1093	0	gp4a	PDK_30s1018561	-	290	453	aagggUcgcUUaaaaaaUUUgccaaUUcgUaagUgaaaUcggcaaUcgaUUUGCUAAUUUCACUUACGAAUCGUCUUAUgUUUUaaUUUUgcgaUUcaUaagUgaagUcgUUaaaUcgaUUgUcgacUUcacgUaUgaaUcggUaaaUUUUUUaagcgacUgac	5'	24	24	24	0	26962	26962	0	26962	26962	0	0	y	...((((((((((((((((((((.(((((((.(((((.(((((((((((((((...((((((((((.(((((((...((......))...))))))).))))))))))...))))))))))))))).))))).))))))).))))))))))))))))))))...	6	0	0	-83	66	22	100	158	6
587	pda-5p-274880_21	AAUUGUACACAGAGAAUACUUAAC	+	7543	7647	1	24	105	-60.3	21	3	1	6	11	gp4a	24	21	905	869	1	gp4a	PDK_30s696601	+	7543	7647	aagUgUgUgcagagaagaUaUAAUUGUAUACAGAGAAUACUUAACUgcaUacgUcaUacagUUaagUgUUcUcUgUaUacaaUUaagUcUUcUcUacacacaaUc	5'	21	21	0	21	19005	0	19005	18249	0	18249	0	y	...((((((.((((((((..(((((((((((((((((((((((((((.((.....)).)))))))))))))))))))))))))))..)))))))).))))))...	0	0	0	-60.3	43	24	100	99	5
471	pda-5p-370156_14	ACCAUUCGCUUCCUGGUAGGUGUG	-	2919	3009	1	24	91	-44.6	14	2	0	11	1	gp4a	24	14	886	847	1	gp4a	PDK_30s776351	-	2919	3009	aaUccgUUgcACCAUUCGCUUUCUGGUAGGUGUGUgUggccUgaagggUgccacacUccUaccgUagUcUgcgaaUgUcgagcaacggccU	5'	14	14	0	14	12404	0	12404	11858	0	11858	0	y	...(((((((..(((((((...((((((((.(((((..(((.....)))..))))).))))))..))...)))))))....)))))))...	6	2	1	-44.6	30	18	100	85	5
265	pda-5p-364804_14	AGUGCUGUGCAUCCUUGGAUGACC	+	20579	20753	0	24	175	-108.8	14	2	0	11	1	gp4a	24	14	897	897	0	gp4a	PDK_30s1046601	+	20579	20753	aaUccUcUacggUacggccUgcgcaccacagAGUGCUGUGCAUCCUUGGAUGACCaccaUcaUgagaUggacgaccaUcaaaUaaUaggcgccgUgUUUgaUggcagUccaUcUcUUgaUggcggccaUccaUggaUgcacagcacUcUacagUaUUgcaggcgcaUcgcagagg	5'	14	14	14	0	12558	12558	0	12558	12558	0	0	y	...(((((.((((.(.(((((((.((...((((((((((((((((.((((((.((.((((((.(((((((((..((((((((((..........))))))))))..))))))))).)))))).)).)))))).))))))))))))))))...))..)))))))).)))).)))))	2	0	0	-108.8	68	22	100	172	10
566	pda-5p-155899_52	AGCGACGACGGAUGCCGGUGGAGG	-	16805	17005	1	24	201	-167.7	52	1	2	45	4	gp4a	24	52	886	853	1	gp4a	PDK_30s738831	-	16805	17005	aaUgccggagccagagaaggagaagagaaaaagagagUgggggagggggggagaaggAGAGACGACGGAUGCCGGUGGAGGgccgcggggggcUagcggccUccgcUgcccccUgcagcccUccacUgUcgUccgccgcUgcUcgUUcacccUUUcUcccccgcUcUcUcUUUcUUUcUcUUcUUcUUcUcUggcUcUggc	5'	52	52	0	52	46072	0	46072	44356	0	44356	0	y	...(((((((((((((((((((((((((((.((((((((((((((..((((.(((.(((((.((.((((((.(((((((((((.(((((((((.(((((...)))))))))))))).))))))))))).)))))).)))).))).))).))))..)))))))))))))).....)))))))))))))))))))))))))))	2	1	2	-167.7	86	21	100	198	3
341	pda-5p-138615_63	GUAAGAACUCAGCGGGACC	+	65467	65667	0	19	201	-68.5	429	209	23	124	73	gp4a	19	63	701	701	0	gp4a	gi|300388125|ref|NC_013991.2|	+	65467	65667	aaUUaUgUUUacUggaUaacUUUccaaUUUgUaUgUUagggagUagaUcaaagUUUcgcUaUaUggaGUAAGAACUCAGCGGGACCcUccUUUgUUUgaUUagagcagUaaggUcccgcUgagUUcUUacUUUUUcaUgUcUaaaaUccggUUcaUccaaUUaCUACAGAGAUGAACCCAACCCGGAAUaUgaaccgUaaa	5'	878	429	429	0	407844	407844	0	407844	407844	0	0	y	..(((((.....((((......)))).....((((((.(((..(((((...((.....)).....(((((((((((((((((((((.....((((((.....))))))...)))))))))))))))))))))......)))))......((((((((.............))))))))...)))..))))))...))))).	0	0	0	-68.5	27	19	100	67	5
931	pda-5p-421095_12	AACUAGUCGGUGUCUAAGGUAAGU	+	83	232	0	24	150	-52.7	12	3	0	9	0	gp4a	24	12	902	902	0	gp4a	PDK_30s730601	+	83	232	aaUUgaUUAACUAGUCGGUGUCUAAGGUAAGUUUggcaggUUcgaccggUagUUUUUaaUUUggagcUaccUgcaUUgaUUcgUcUUUUcgagUUaaUgacaUaUaccUUccaccgaUcUcacUUaccUggcUgacaUggUUaaUcaUaU	5'	12	12	12	0	10824	10824	0	10824	10824	0	0	y	...((((((((((((((((.....((((((((..((..(((......((((((((........)))))))).(((((((((((......)))))))))).)...........)))..))..)))))))).)))))).))))))))))...	6	4	2	-52.7	29	19	100	144	71
9	pda-5p-37236_491	ACUUCGAGUAGGAUUCCUAGAGUC	-	518	618	0	24	101	-52.6	491	214	2	268	7	gp4a	24	491	894	894	0	gp4a	PDK_30s874461	-	518	618	acaaaUcUUACUUCGAGUAGGAUUCCUAGAGUCcUaaUUggaUUaggacUggaaaUccUaaUUggagUAGGACUAGGAUUCCUACUUggagUaggaUUccU	5'	611	491	491	0	438954	438954	0	438954	438954	0	0	y	...(((((((((((((((((((.((((..(((((((.((..(((((((.......)))))))..)).))))))))))).)))))))))))))))))))...	2	2	1	-52.6	39	21	100	95	7
209	pda-3p-138631_63	AGGACUGGGAUUCCUACU	-	518	618	1	18	101	-52.6	100.5	29.5	8	53.5	9.5	gp4a	18	63	668	632	1	gp4a	PDK_30s874461	-	518	618	acaaaUcUUACUUCGAGUAGGAUUCCUAGAGUCcUaaUUggaUUaggacUggaaaUccUaaUUggagUAGGACUAGGAUUCCUACUUggagUaggaUUccU	3'	611	100.5	0	100.5	75847.5	0	75847.5	72146	0	72146	0	y	...(((((((((((((((((((.((((..(((((((.((..(((((((.......)))))))..)).))))))))))).)))))))))))))))))))...	2	2	1	-52.6	39	21	100	95	7
629	pda-5p-214434_31	AAUAUUCCUGCUGCUUGUCGCUCC	+	32669	32834	1	24	166	-130.1	62	11	0	51	0	gp4a	24	31	906	867	1	gp4a	PDK_30s776881	+	32669	32834	acaccaccaUgcUgcUagcaggAAUAUUCCUGCUGCUUGUCCCUCCaggUUaUUcUgacacUUcaaUggaggcagcUaUUUgUaaggUacUgUgcUgccUccaUUgaagUgccaaaaUaacUgggagcgacaagcagcaggaaUaUUccUgcUagcagcaUggUgg	5'	62	62	0	62	52014	0	52014	49596	0	49596	0	y	...((((((((((((((((((((((((((((((((((((((.((((..((((((.((.((((((((((((((((((.....(((...)))...)))))))))))))))))).)).))))))..)))).))))))))))))))))))))))))))))))))))))))	2	0	0	-130.1	71	23	100	163	3
311	pda-5p-367016_14	CCUUCUGUUCGGCUGCACAGUGCC	-	169454	169561	0	24	108	-72.1	24	2	1	20	1	gp4a	24	14	899	899	0	gp4a	PDK_30s1024561	-	169454	169561	acacccccccaUUUgcUaaggaCCUUCUGUUCGGCUGCACAGUGCCgaacagaaggcUUCUGUCCGGCACUGUACAGCCgaacagaaggggaggcgggaggggggagg	5'	2709	24	24	0	20426	20426	0	20426	20426	0	0	y	....((((((...((((.....(((((((((((((((.(((((((((.((((((...)))))).))))))))).)))))))))))))))...))))...))))))...	2	0	0	-72.1	40	23	100	101	3
790	pda-3p-21009_1073	UCUGUCCGGCACUGUUCAGCC	-	169454	169561	1	21	108	-72.1	2652	260.5	41	2261.5	89	gp4a	21	1073	778	739	1	gp4a	PDK_30s1024561	-	169454	169561	acacccccccaUUUgcUaaggaCCUUCUGUUCGGCUGCACAGUGCCgaacagaaggcUUCUGUCCGGCACUGUACAGCCgaacagaaggggaggcgggaggggggagg	3'	2709	2652	116	2536	2091157	91599	1999558	1992259	91599	1900660	0	y	....((((((...((((.....(((((((((((((((.(((((((((.((((((...)))))).))))))))).)))))))))))))))...))))...))))))...	2	0	0	-72.1	40	23	100	101	3
63	pda-5p-110153_92	UUGGAGAACUCUAGCCUAUGC	+	20437	20603	0	21	167	-79	59	4.5	1	53.5	0	gp4a	21	92	778	778	0	gp4a	PDK_30s660281	+	20437	20603	acaUgcUUacacaUcaacaaccaUgUgaUUUGGAGAACUCUAGCCUAUGCaUcaagUgaUcaaaaaacaUaUaUaaUUUaaUUUUcUUUagaaUaUUcaaUUUUUUgaccacgUgaUgcaUaggcUagaagUcUccaaaUcaUaUgaUUUUUggUaUgUgagUagUU	5'	105	59	59	0	47137	47137	0	47137	47137	0	0	y	...((((((((.(((((.((.(((((((((((((((..((((((((((((((((.(((.((((((((.....(((.(((((......))))).)))....)))))))).))).))))))))))))))))..))))))))))))))).)).))))).))))))))...	4	0	0	-79	65	19	100	161	6
27	pda-5p-233999_27	AAAGCGUCGGCGUACUUCAACCGA	-	109	195	0	24	87	-48.2	19.5	3	1	13	2.5	gp4a	24	27	871	871	0	gp4a	PDK_30s1090511	-	109	195	acccgacgcUUaAAAGCGUCGGCGUACUUCAACCGAcgcUUcccaccgUaUUgUgUUggacUaUgccgacgcUUUcaagcgUcgUUc	5'	39	19.5	13.5	6	17086.5	11758.5	5328	16852.5	11758.5	5094	0	y	...((((((((.((((((((((((((.(((((((((..(........)..))).)))))).)))))))))))))).))))))))...	2	1	1	-48.2	32	23	100	81	8
49	pda-5p-172763_44	AUUCUAAGCAUGUUCGGGUU	+	7849	7957	1	20	109	-43	58	6.5	4.5	45	2	gp4a	20	44	738	702	1	gp4a	PDK_30s706231	+	7849	7957	acccUgaaacaacccAUUUUAAGCAUGUUCGGGUUUgacgUaaaUgagUUUgggccaUaaaUgagUcaaccUacUUagacaUgUUUaUcaaaUgggUUgggUUcaggUU	5'	116	58	0	58	42799	0	42799	40780	0	40780	0	y	..((((((.((((((((((((((((((((..((((((((....(((.((....)))))......)))))...)))..))))))))))..))))))))))..))))))..	4	3	2	-43	39	18	100	105	4
855	pda-3p-329752_16	AAACAGGUCAGACAUAUAAAACCC	+	60873	60977	0	24	105	-41	16	4	4	7	1	gp4a	24	16	908	908	0	gp4a	PDK_30s969931	+	60873	60977	ACCUGUUUAGACCUGUUUAGACCCgUUUaaccUgUUUagaccUgUUUaacaUgccUaacagUUaaacggaUUaaacggUUUAAACAGGUCAGACAUAUAAAACCC	3'	56	16	16	0	14528	14528	0	14528	14528	0	0	y	...(((((.((((((((((((((.((((((.((((((((..(((((..........))))))))))))).)))))))))))))))))))))))))..........	1	1	1	-41	38	19	87	92	10
659	pda-5p-183654_40	ACCUGUUUAGACCUGUUUAGACCC	+	60873	60977	0	24	105	-41	40	16	0	20	4	gp4a	24	40	892	892	0	gp4a	PDK_30s969931	+	60873	60977	ACCUGUUUAGACCUGUUUAGACCCgUUUaaccUgUUUagaccUgUUUaacaUgccUaacagUUaaacggaUUaaacggUUUAAACAGGUCAGACAUAUAAAACCC	5'	56	40	40	0	35680	35680	0	35680	35680	0	0	y	...(((((.((((((((((((((.((((((.((((((((..(((((..........))))))))))))).)))))))))))))))))))))))))..........	1	1	1	-41	38	19	87	92	10
738	pda-3p-349991_15	UAAAUGCUGCUGUUGAUUCAA	-	9005	9179	0	21	175	-90.1	15	0	0	15	0	gp4a	21	15	781	781	0	gp4a	PDK_30s684081	-	9005	9179	acgacaUccagaaUacaagaggggaagggcacaccUaaUUUUgaaUcaacagcagcaUaUUagaUUaaaaccgaUcUUUaacUUUaaaggUcacUUUUagUUUAAAUGCUGCUGUUGAUUCAAaUUUagUUUUgUUaUUUggUgcgcccUcgcccUcUUaUagUcUggaUgUUag	3'	15	15	15	0	11715	11715	0	11715	11715	0	0	y	..((((((((((.((.(((((((..(((((.(((((((.(((((((((((((((((((.(((((((((((..((((((((....))))))))..)))))))))))))))))))))))))))))).)))............)))).)))))..))))))).)).))))))))))..	1	1	1	-90.1	69	21	100	171	4
255	pda-3p-107067_96	GCUGCCGGACUCUUGUUUCGAAGG	+	9403	9567	0	24	165	-90.8	96	46	1	47	2	gp4a	24	96	903	903	0	gp4a	PDK_30s991011	+	9403	9567	acggcUgggUccUcUaUUUUgUUUGAAACAAGUGUUCGGCUGCUUUUUUgUUUUUgcgacUUUUaagUgaagUcggcaaaUUgcUUgccgacUUUaUUUaaaUaUcgcgaacUUaaaaaaGCUGCCGGACUCUUGUUUCGAAGGaaacagggaacccaacUgcgg	3'	125	96	96	0	86688	86688	0	86688	86688	0	0	y	.(((.(((((.((((.(((..(((((((((((.(((((((.(((((((((..(((((((..((((((((((((((((((.....))))))))))))))))))..)))))))..))))))))).))))))).)))))))))))..))).)))).))))).)))...	2	0	0	-90.8	67	19	100	161	5
535	pda-5p-311908_18	UGAAACAAGUGUUCGGCUGCU	+	9403	9567	0	21	165	-90.8	29	7	5	16	1	gp4a	21	18	784	784	0	gp4a	PDK_30s991011	+	9403	9567	acggcUgggUccUcUaUUUUgUUUGAAACAAGUGUUCGGCUGCUUUUUUgUUUUUgcgacUUUUaagUgaagUcggcaaaUUgcUUgccgacUUUaUUUaaaUaUcgcgaacUUaaaaaaGCUGCCGGACUCUUGUUUCGAAGGaaacagggaacccaacUgcgg	5'	125	29	29	0	23341	23341	0	23341	23341	0	0	y	.(((.(((((.((((.(((..(((((((((((.(((((((.(((((((((..(((((((..((((((((((((((((((.....))))))))))))))))))..)))))))..))))))))).))))))).)))))))))))..))).)))).))))).)))...	2	0	0	-90.8	67	19	100	161	5
680	pda-3p-258367_24	ACGGCCCGGCACUGUAGCUAUCGG	-	2936	3056	1	24	121	-119.3	24	14	0	4	6	gp4a	24	24	888	850	1	gp4a	PDK_30s1104901	-	2936	3056	acUgggccgggccgUggccgaUagcUacagUgccgggcUgUgccUggcacggccccUUUaaaUgggccgUgccaggcACGGCCCGGCCCUGUAGCUAUCGGgccccacggcccggccUnnn	3'	24	24	0	24	21312	0	21312	20400	0	20400	0	y	...(((((((((((((((((((((((((((.((((((((((((((((((((((((........)))))))))))))))))))))))).)))))))))))))...))))))))))))))...	2	0	0	-119.3	51	23	100	115	8
384	pda-3p-89170_129	AAGUAGUUUGUGGGAGAGUUGGUA	+	32357	32483	0	24	127	-92.8	64.5	7	0	57.5	0	gp4a	24	129	888	888	0	gp4a	PDK_30s1210051	+	32357	32483	acUUcUggUcaaUaccaacUcUcccacaaacUacUUcaUgccacUaUUcUaggUUUUaUgacaUUggaggaaaaccUagaaUagUggcaUgAAGUAGUUUGUGGGAGAGUUGGUAUcgaUcagaUag	3'	129	64.5	64.5	0	57276	57276	0	57276	57276	0	0	y	...(((((((.((((((((((((((((((((((((((((((((((((((((((((((.............)))))))))))))))))))))))))))))))))))))))))))))).)))))))...	0	0	0	-92.8	53	24	100	121	13
847	pda-3p-17663_1328	AGGUGUGAAGCGAUCUCGUACUAAACGAAU	-	494	650	1	30	157	-113.3	8523	2253	1579.5	901	3789.5	gp4a	30	1328	1119	1080	1	gp4a	M01000056501	-	494	650	agaacUUcgUUUagUacgagaUcgcUUcacaccUcgcggUgcUUacaccUcUcgccUaUcgaagUUcUgUUcaaaaaccUcgUacgagaacUUgUaUagagaaggggUgUaagcaccgcgAGGUGUGAAGCGAUCUCGUACUAAACGAAGUUcUgUU	3'	11685	8523	2981	5542	9.73199e+06	3762896	5.96909e+06	9.51607e+06	3762896	5.75318e+06	0	y	(((((((((((((((((((((((((((((((((((((((((((((((((((((..((((..(((((((((.............)).)))))))..)))).).))))))))))))))))))))))))))))))))))))))))))))))))))))...	0	0	0	-113.3	66	30	100	154	13
667	pda-3p-313542_18	UUUUGUUCGGCGGUCCAGUGCC	-	86134	86238	1	22	105	-80.4	42	4	0	37	1	gp4a	22	18	803	766	1	gp4a	PDK_30s1074861	-	86134	86238	AGAAGCCUUCUGUUCGGCACUGGaUcgccgaacagaagccUUcUgUUcggcaccgUUcagccgaacagaagcaUUUUGUUCGGCGAUCCAGUGCCgaacggagca	3'	56	42	0	42	33138	0	33138	31512	0	31512	0	y	....((..(((((((((((((((((((((((((((((..((((((((((((........))))))))))))..))))))))))))))))))))))))))))))).	2	2	1	-80.4	43	17	82	100	8
713	pda-3p-94240_118	AUGCAGAAUCUCCUGAGUACUCGG	+	2362	2515	0	24	154	-90.4	148	38	7	81	22	gp4a	24	118	893	893	0	gp4a	M01000016599	+	2362	2515	AGACUAUCUCAGGCGGAGUACAUCagcagagUacUcaagagaUUcUgcaUggagggUgccaaaccUgUUggcacaccacUaggUgcccacUUaaagcUUUcaUccUccAUGCAGAAUCUCCUGAGUACUCGGcUgaUgUaccUccggagaUUcU	3'	173	148	148	0	132358	132358	0	132358	132358	0	0	n	(((..(((((...((((((((((((((.(((((((((.((((((((((((((((((((........((.(((((........))))).))..........)))))))))))))))))))).))))))))).)))))))))).))))))))))))	3	3	3	-90.4	51	19	100	154	42
826	pda-3p-250092_25	UUAAGUGAAGUCGGCAACCGA	+	33102	33223	0	21	122	-62.5	25	1	1	21	2	gp4a	21	25	785	785	0	gp4a	PDK_30s751021	+	33102	33223	agagaUUUgUaagUaaagUcggcaaaUcggUUgUUgacUUcaUUUacaaaUUUUcaaaUUUUUUaaUUUaaaaaUUUUAAGUGAAGUCGGCAACCGAUUUgccgacUUcacUUaaaaUcccc	3'	25	25	25	0	19625	19625	0	19625	19625	0	0	y	...(((((.(((((.((((((((((((((((((..(((((((((((.(((((((.(((((....))))).))))))))))))))))))..)))))))))))))))))).))))))))))...	4	1	1	-62.5	51	19	100	116	4
R11	pda-5p-253816_24-R11	AAAAAGCCAGUACUGACGCCUUGC	-	14519	14724	0	R	206	-178.2	21	6.5	1	13.5	0	gp4a	R	24	908	908	0	gp4a	PDK_30s993561	-	14519	14724	agcaUaUgcaagUcaggcUUaUcccUcacccUUggcacUcccaccaaagaaUUaaaaUagUUAAAAAGCCAGUACUGACGCCUUGCagaggagccUccacUcaccaUgagUcggggggccUcUgcaaggcgUcagUacUggcUUUUUaacUaUUUUaaUUcUUUggUgggagUgccaagggUgagggacaagccUggcccgcaUaU	5'	42	21	21	0	18924	18924	0	18924	18924	0	0	y	...((((((..(((((((((.((((((((((((((((((((((((((((((((((((((((((((((((((((((((((((((((((((((..(((((((((.....)))).))))).)))))))))))))))))))))))))))))))))))))))))))))))))))))))))))))))))))))).)))))))))..))))))	0	0	0	-178.2	94	24	100	203	5
800	pda-5p-353741_15	AUUGAGAUGUUUGGGGACCUGGUG	-	15849	15996	0	24	148	-46.3	15	0	0	14	1	gp4a	24	15	884	884	0	gp4a	PDK_30s1146771	-	15849	15996	agggAUUGAGAUGUUUGGGGACCUGGUGaUggaccccaUagaagaUgUgaaUcaUggUUUagaaUaUUUaaaUaUUaaaUaaUUUagUUUgUgaUUUaUaaUUgaUgUUaUaggggaagagUcagcggUgccaagagaUUUUgaUcag	5'	15	15	15	0	13260	13260	0	13260	13260	0	0	y	...(((..((((.(((.((.(((.(.((((...((((((((..(((((((((((..(..((((.(((((((...))))))).))))..)..))))))))).))....)))).))))....)))).)))).)).))).))))..)))..	4	1	1	-46.3	51	17	100	143	3
935	pda-5p-113778_87	UCUGCUGUUCACCCUGUGUUG	-	59470	59630	0	21	161	-72.9	174	17	5	150	2	gp4a	21	87	778	778	0	gp4a	PDK_30s806321	-	59470	59630	aggUUUUggUacgUaaagaUacUgUgcacagcggUgcaUCUGCUGUUCACCCUGUGUUGagcaUUaaaUcagcUUaagaUcaUUUcacUgcacaaaUcUcaacagagggUgaaUggcagaUgUgcggccgcacacaggacaUgUUUUaUgUgcUagaaaaU	5'	174	174	174	0	129995	129995	0	129995	129995	0	0	y	...(((((((((((((((...(((((....((.(..(((((((..((((((((.(((((((.(((....(((...((.....))...)))....)))))))))).))))))))..)))))))..).))....)))))......)))))))))))))))...	4	0	0	-72.9	53	18	100	155	5
408	pda-5p-270991_22	AUGUUUGAACACUUAAUCUAGCCU	+	849	1000	0	24	152	-80.6	22	4	5	9	4	gp4a	24	22	900	900	0	gp4a	PDK_30s972371	+	849	1000	agUaagcUUggcaUacagUUaaUcaAUGUUUGAACACUUAAUCUAGCCUgacacaUagUUUaaUcUUcUcggcacacagUUaagUaagaUUaaaUUgUgUgcagagcUagaUUaagUUUUcaaaUaUUgacUaacUaUgUgcUaagUUUgUU	5'	22	22	22	0	19800	19800	0	19800	19800	0	0	y	..(((((((((((((.(((((.((((((((((((.(((((((((((((((.((((((((((((((((((..((.....))..)).))))))))))))))))))).)))))))))))).)))))))))))).))))).)))))))))))))..	2	1	1	-80.6	65	23	100	148	5
949	pda-3p-313824_18	AGGAGUCGACUCCAGCUCUGCAGG	+	67	246	0	24	180	-100.6	29	3	3	18	5	gp4a	24	18	894	894	0	gp4a	PDK_30s930241	+	67	246	agUcgacUccUgcAGGGCUGGAGUCGACUCCUGCAGGcaacccaaaaaacUgcUcUcUgUUUcUUcacUgUggcagaUgcgagUcgacccUcUcaUcccUggggUcgacUcaagcUUcaUAGGAGUCGACUCCAGCUCUGCAGGagUcgacUccaUUcagUUggcacagacUUUUUcaag	3'	46	29	29	0	26157	26157	0	26157	26157	0	0	y	(((((((((((((((((((((((((((((((((.((((...........(((((....((......))...)))))....((((((((((.(........)))))))))))..))))..)))))))))))))))))))))))))))))))))(((......)))................	3	1	1	-100.6	37	23	100	152	75
160	pda-5p-321868_17	AGGGCUGGAGUCGACUCCUGCAGG	+	67	246	0	24	180	-100.6	17	2	1	12	2	gp4a	24	17	913	913	0	gp4a	PDK_30s930241	+	67	246	agUcgacUccUgcAGGGCUGGAGUCGACUCCUGCAGGcaacccaaaaaacUgcUcUcUgUUUcUUcacUgUggcagaUgcgagUcgacccUcUcaUcccUggggUcgacUcaagcUUcaUAGGAGUCGACUCCAGCUCUGCAGGagUcgacUccaUUcagUUggcacagacUUUUUcaag	5'	46	17	17	0	15521	15521	0	15521	15521	0	0	y	(((((((((((((((((((((((((((((((((.((((...........(((((....((......))...)))))....((((((((((.(........)))))))))))..))))..)))))))))))))))))))))))))))))))))(((......)))................	3	1	1	-100.6	37	23	100	152	75
347	pda-5p-93628_119	UAGCCAAGGAUGAUCUGCCUA	-	155	332	0	21	178	-78.4	119	18	3	96	2	gp4a	21	119	783	783	0	gp4a	PDK_30s1187501	-	155	332	agUggaagagaggUcUUacaUggagaUaggagUcUgacUUUgaUAGCCAAGGAUGAUCUGCCUAUgUccUcUUcgagUgUUUUcagUgUUUcaaaagcUUUgggUggUcUcgUaggcagUcUccUUggcUagUUUgagcgacUUUUaUccgccaUgccagaccUacaUcUcUUcccca	5'	119	119	119	0	93177	93177	0	93177	93177	0	0	y	...(((((((((((((..(((((.((((..((((.(.(((...((((((((((.((.(((((((((.((.((..((((..................))))..)).))...)))))))))))))))))))))....))))))))..))))..)))))..)))))....))))))))...	1	1	2	-78.4	59	19	100	172	18
914	pda-5p-196234_36	AUAUGCCUAGGCUCUGGAACGAGU	+	142730	142926	0	24	197	-148.2	64	13	2	41	8	gp4a	24	36	881	881	0	gp4a	PDK_30s1060231	+	142730	142926	agUUUUUgUUUUccacccaaaacgcgUcUgcaagaUUUggagacacccgccUcAUAUGCCUAGGCUCUGGAACGAGUcUUUccgaUgUggaacUaUgaggcccaaUaaUcccacaUcggaaagacUcgUUccaaagccUgagcaUaUgaggcggaUgUcUccaaaUccUgcagacgcgUUUUgagUggaaaacaaaa	5'	64	64	64	0	57256	57256	0	57256	57256	0	0	y	...(((((((((((((.(((((((((((((((.((((((((((((.(((((((((((((..(((((.(((((((((((((((((((((((...(((........)))...))))))))))))))))))))))).)))))..))))))))))))).)))))))))))).))))))))))))))).)))))))))))))	4	0	0	-148.2	84	21	100	194	8
769	pda-3p-98930_109	UCGGAAAGACUCGUUCCAAAGCCU	+	142730	142929	0	24	200	-148.8	125	31	16	57	21	gp4a	24	109	897	897	0	gp4a	PDK_30s1060231	+	142730	142929	agUUUUUgUUUUccacccaaaacgcgUcUgcaagaUUUggagacacccgccUcaUaUgccUaggcUcUggaacgagUcUUUccgaUgUggaacUaUgaggcccaaUaaUcccacaUCGGAAAGACUCGUUCCAAAGCCUgagcaUaUgaggcggaUgUcUccaaaUccUgcagacgcgUUUUgagUggaaaacaaaaUcg	3'	125	125	125	0	112301	112301	0	112301	112301	0	0	y	...(((((((((((((.(((((((((((((((.((((((((((((.(((((((((((((..(((((.(((((((((((((((((((((((...(((........)))...))))))))))))))))))))))).)))))..))))))))))))).)))))))))))).))))))))))))))).)))))))))))))...	2	0	0	-148.8	84	23	100	194	8
753	pda-3p-417972_12	UUUGGGCACCUGGACAUUUGGCACCA	+	39516	39666	0	26	151	-57.6	12	1	2	6	3	gp4a	26	12	974	974	0	gp4a	PDK_30s919261	+	39516	39666	aUaccacaUggcaggUUUcUagaagUUgaggUgUcacaaacUUUUggaUacUcagacacUcagcacaUgUaccacaUaUcaUgUUUUcUaggagUcaaggUgUUgcaaaUUUUUGGGCACCUGGACAUUUGGCACCAaUgccaUgUggcUa	3'	12	12	12	0	11688	11688	0	11688	11688	0	0	y	...(((((((((((((..(((((.((..(((((((.((((..((((((((((..(((.(..((.(((((..........)))))...))..).)))..)))))).))))..)))))))))))..)).))))).)))..))))))))))...	4	1	2	-57.6	52	21	100	145	10
R12	pda-5p-231728_28-R12	AGCAGUGCUCUUUUCAACAAGCGA	-	60642	60763	0	R	122	-88.5	14	2.5	0	11.5	0	gp4a	R	28	892	892	0	gp4a	PDK_30s770891	-	60642	60763	aUagagccaUcaggggUgaaaUggUUaaAGCAGUGCUCUUUUCAACAAGCGAaggaaUaUggaaaUgccUUcgcUUgcUgaaaagagcacUgcUcUaaccaUUUcaUcccUggcggcUcaUa	5'	28	14	14	0	12488	12488	0	12488	12488	0	0	y	...(((((..(((((((((((((((((.((((((((((((((((.((((((((((..(((....))))))))))))).)))))))))))))))).)))))))))))))))))..)))))...	2	0	0	-88.5	51	23	100	116	4
926	pda-3p-130659_69	ACAAAGCUUUGGAGAACUGUU	+	9347	9546	0	21	200	-149.8	218.5	16	14	173	15.5	gp4a	21	69	794	794	0	gp4a	PDK_30s782981	+	9347	9546	aUaUgcUcacagaaagUUcaUaUcUgaUUaagaagcUUcUUUccUUggaacacUUgaaCAGUUCCUCCAAAGCUUUGUAgUUaacaccUcUaUUcUUUgaagagaacaggagUgUUaacUACAAAGCUUUGGAGAACUGUUcaagUgUUcUgaggaaagaagcUccUUaaUcagaUaUgaacUUUcUgUgagcaUgUUUg	3'	350	218.5	208	10.5	161830	153252	8578.5	161432	153252	8179.5	0	y	((((((((((((((((((((((((((((((((.((((((((((((..(((((((((((((((((.((((((((((((((((((((((..((.(((((....))))).))..)))))))))))))))))))))))))))))))))))))))..)))))))))))).))))))))))))))))))))))))))))))))...	1	1	1	-149.8	90	20	100	197	4
179	pda-5p-224392_29	CAGUUCCUCCAAAGCUUUGUA	+	9347	9546	0	21	200	-149.8	121	8	3	102	8	gp4a	21	29	782	782	0	gp4a	PDK_30s782981	+	9347	9546	aUaUgcUcacagaaagUUcaUaUcUgaUUaagaagcUUcUUUccUUggaacacUUgaaCAGUUCCUCCAAAGCUUUGUAgUUaacaccUcUaUUcUUUgaagagaacaggagUgUUaacUACAAAGCUUUGGAGAACUGUUcaagUgUUcUgaggaaagaagcUccUUaaUcagaUaUgaacUUUcUgUgagcaUgUUUg	5'	350	121	121	0	92443	92443	0	92443	92443	0	0	y	((((((((((((((((((((((((((((((((.((((((((((((..(((((((((((((((((.((((((((((((((((((((((..((.(((((....))))).))..)))))))))))))))))))))))))))))))))))))))..)))))))))))).))))))))))))))))))))))))))))))))...	1	1	1	-149.8	90	20	100	197	4
R	pda-5p-400528_12-R13	AAUUAAGUCUUCUCUGCACACACU	+	218	342	0	R	125	-63.4	11	0.5	1	8	1.5	gp4a	R	12	877	877	0	gp4a	PDK_30s899581	+	218	342	aUaUUcUcUgUaUacAAUUAAGUCUUCUCUGCACACACUaaaUUgUaUgaUgcagaaaaUacUUaacUgUgUacaaagaagaUUUaagUgUgUgcagagaagaUUUaaUUgUaUaUagagaacac	5'	22	11	11	0	9492	9492	0	9492	9492	0	0	y	...(((((((((((((((((((((((((((((((((((((((((...(((..(((...........)))..).)).....))))).))))))))))))))))))))))))))))))))))))...	0	0	0	-63.4	47	24	100	119	11
230	pda-3p-165824_47	CUCCCAAGCCUCAUUUCAUGG	+	9275	9429	0	21	155	-87.4	23.5	3	2	18	0.5	gp4a	21	47	781	781	0	gp4a	PDK_30s842071	+	9275	9429	aUcUcacgggaUaUUcgaccAUGAAAUGAGGUUUGGGAGAUgggUUcUUgcccgUgggagaggUggcaUcaUcUUcUccUUccaUUgcccccgUcgcUgaUccggcgaggUUcccUCUCCCAAGCCUCAUUUCAUGGccgaaUaUcUUgUgaUcU	3'	57	23.5	23.5	0	18353.5	18353.5	0	18353.5	18353.5	0	0	y	...((((..((((((((.((((((((((((((((((((((.(((.(((((((...((((((((((....)))).))))))......((.......))......)))))))..))))))))))))))))))))))))).))))))))..))))...	0	0	0	-87.4	44	20	100	149	51
251	pda-3p-274391_21	CAAGUGUUCUAAGGAAAGAAGC	-	9261	9418	1	22	158	-113.7	10.5	1	0	7	2.5	gp4a	22	21	817	779	1	gp4a	PDK_30s782981	-	9261	9418	aUcUgaUUaaggagcUUcUUUccUcagaacacUUgaacagUUcUccaaagcUUUgUagUUaacacUccUgUUcUcUUcaaagaaUagaggUgUUaacUacaaagcUUUggaggaacUgUUCAAGUGUUCCAAGGAAAGAAGCUUcUUaaUcagaUaUg	3'	21	10.5	0	10.5	8578.5	0	8578.5	8179.5	0	8179.5	0	y	((((((((((((((((((((((((..(((((((((((((((((((((((((((((((((((((((..(((((((......)))))))..)))))))))))))))))))))).)))))))))))))))))..))))))))))))))))))))))))...	4	0	0	-113.7	70	20	100	155	6
69	pda-5p-418800_12	GCUACUGUCAGAAGAUGAAUGCCU	-	5375	5569	0	24	195	-108	12	5	0	6	1	gp4a	24	12	916	916	0	gp4a	PDK_30s755151	-	5375	5569	aUcUUUUgUggUgUgcgaUUagcgccgUagagUgUUgUaUagcacccgaUgGCUACUGUCAGAAGAUGAAUGCCUaUcaaUagcagcagccaUgUaUggUacaUaaggccaUcUUaUUUgaUagccaUUcaUcUUcUgaUagcagccaUcgagUgUUgUacagcaUUUUgcagUgcaaacUgUacacUgcagaga	5'	12	12	12	0	10992	10992	0	10992	10992	0	0	y	...(((((..((((((..((.((((.(((((((((((((((((((.((((((((.(((((((((((((((((.(((((((........((((((((...)))))..)))........))))))).))))))))))))))))).)))))))).))))))))))))))))))).)))).))..))))))..))))).	2	0	0	-108	68	22	100	191	37
486	pda-5p-277581_21	AACGAGUCUUUUCGAUGUGGGACU	+	9945	10103	0	24	159	-106.7	38	16	6	12	4	gp4a	24	21	899	899	0	gp4a	PDK_30s914981	+	9945	10103	aUgUccaggcUcUggAACGAGUCUUUUCGAUGUGGGACUaUUggcccUcacaUccUUcccaccaUcggacaagagUcaUccUcggcUcUUacaUcggacgacUcUcgUcUgaUggUggaaagggUaUgaggcccaaUagUcccacaUcggaaagacUcg	5'	38	38	38	0	33839	33839	0	33839	33839	0	0	y	...(((((...))))).(((((((((((((((((((((((((((.(((((.((((((.((((((((((((.((((((.(((..............))).)))))).)))))))))))).)))))).))))).)))))))))))))))))))))))))))	0	0	0	-106.7	59	23	91	142	14
883	pda-5p-104109_100	AGUGAAAGUCGGCAAACCAAUUGC	+	22067	22262	0	24	196	-121.9	100	33	1	63	3	gp4a	24	100	902	902	0	gp4a	PDK_30s1093251	+	22067	22262	aUgUcgUUUgaaacaggggccagacgggggccUUUUaUUUUUgagaUUUUUaAGUGAAAGUCGGCAAACCAAUUGCcgacUUcacUUaUUUUUUUUaUUUUaaaaaaagUUaagUgaagUcgacaaUgggUUUgccgacUUUcacUUaaaaacUccaaaaaUaaaagaagccccUcUggccccUaUUUcgaacgaa	5'	100	100	100	0	90200	90200	0	90200	90200	0	0	y	...((((((((((.((((((((((..(((((((((((((((((.((((((((((((((((((((((((((.((((.(((((((((((((((((((((...))))))))).)))))))))))).)))).)))))))))))))))))))))))).))))))))))))))..))))))))))))))).)))))))))).	2	0	0	-121.9	88	22	100	192	3
R14	pda-3p-263356_23-R14	UCAGAUCAUGUUGCAGUUUCAUC	-	148222	148349	0	R	128	-56.2	11.5	2.5	0	9	0	gp4a	R	23	857	857	0	gp4a	PDK_30s943301	-	148222	148349	aUgUggUgcaccacgagcagcUgaagcUgccagcaUgaUcUgaUcUcUUcUUUccUUUcUUccaaaUcUUggaUgaaUaUgcacaUCAGAUCAUGUUGCAGUUUCAUCUgcUgaUcggagcaccaaaa	3'	23	11.5	11.5	0	9855.5	9855.5	0	9855.5	9855.5	0	0	y	...((((((.((...(((((.((((((((.((((((((((((((............(((.(((((...))))).))).......)))))))))))))))))))))).)))))....)).))))))...	2	1	1	-56.2	35	22	100	122	40
307	pda-5p-432618_11	AUUGGAUUGUAAUUUGAUUGAAUC	+	1232	1354	0	24	123	-42	11	4	0	7	0	gp4a	24	11	902	902	0	gp4a	PDK_30s1039611	+	1232	1354	AUUGGAUUGUAAUUUGAUUGAAUCaaUUggaccUaaUUaaUUgggcUUgaUcUUaUUUgaUaaggUUcaagagUccUacaUggUgUaggacUccUagaUUUcUaaUUggaUUagaacUUcaaa	5'	11	11	11	0	9922	9922	0	9922	9922	0	0	y	.(((((((.(((((..((((((((..((((((((.(((((..(((.....)))...))))).))))))))(((((((((.....)))))))))...)))))..)))..))))).)).))))).	4	2	2	-42	20	20	95	121	72
164	pda-3p-91106_124	CCUGUGCUUGCCUCCUCCACU	-	15716	15869	0	21	154	-79.3	175.5	1	0	174.5	0	gp4a	21	124	774	774	0	gp4a	PDK_30s1156261	-	15716	15869	aUUgggaggUagcagUagcagUggaaggggcaUgcagaggagaggccaagaaggagagaaggagagaaggaaagaaagaUUcUcaUcUcagUgcUUcUUcUggaggcaaaUUCCUGUGCUUGCCUCCUCCACUccUgcUgcUUccacUccccca	3'	194	175.5	175.5	0	135404	135404	0	135404	135404	0	0	y	...(((((..((((((((.((((((.((((((.(((.(((((..(((.((((((((.....((((..((((........))))..))))....))))))))...)))...))))).))).)))))).)))))).))))))))....)))))...	2	0	0	-79.3	52	18	100	148	8
R15	pda-3p-228238_28-R15	ACGCUUAAAAGCGUCGGCAUA	+	103	212	0	R	110	-48.9	14	2	1	11	0	gp4a	R	28	767	767	0	gp4a	PDK_30s883701	+	103	212	aUUUcUacUgccgaUgcUUUUaagcgUcaaccUagUccgacagaaaccaaccgUUUgaagcaUcggUUaccUcgcggaUgaacgACGCUUAAAAGCGUCGGCAUAgaUca	3'	28	14	14	0	10738	10738	0	10738	10738	0	0	y	...((((.((((((((((((((((((((......(((((..((.....(((((..........)))))..))..)))))....))))))))))))))))))))))))...	1	1	1	-48.9	36	21	100	104	10
130	pda-5p-124075_75	UUAGAGCAUCGUCCAGGAUUUUCC	+	2854	2994	0	24	141	-83.2	37.5	16.5	0	21	0	gp4a	24	75	894	894	0	gp4a	PDK_30s731021	+	2854	2994	caaaaUUAGAGCAUCGUCCAGGAUUUUCCUagUUcUaUaccUUcccUUcUaggacUUaaagUUaaaUUUaaUgacaUUaUaUUaaagUccUaaaagggaagcUaacgaacUaggaaaaUccUggacgaUgcUcUaaUUUUg	5'	75	37.5	37.5	0	33525	33525	0	33525	33525	0	0	y	(((((((((((((((((((((((((((((((((((..((.((((((((.((((((((((.((((.......)))).)))......))))))).)))))))).))..)))))))))))))))))))))))))))))))))))	0	0	0	-83.2	59	24	100	141	7
849	pda-3p-313473_18	AAAUCGACGAUACAACUAAGGACC	+	3264	3527	0	24	264	-105.1	21	7.5	0	13.5	0	gp4a	24	18	890	890	0	gp4a	PDK_30s874161	+	3264	3527	caacaccUgaaUaaaUUUggUccUUagUUggaUcgUcgaUUUUUUUUUUccaaUccUUagUUggaUggaacaaUcaUUUgUgcaagcaUggaaacUcUcUgaaggaUUgaaaagaaaacaAAAUCGACGAUACAACUAAGGACCaaaUUUaUUcaggUgUUgaaacaUagaaaagagggUaagagagaaaaaacUUgaggUUcccUaaaaacaacggUgacacaaUcagUgcaccccaUgaggagcUcUgUggUgaUcaaaggc	3'	30	21	21	0	18894	18894	0	18894	18894	0	0	y	((((((((((((((((((((((((((((((.((((((((((((((((((.((((((((.....(((......))).((..((....))..)).........)))))))).))))))...)))))))))))).))))))))))))))))))))))))))))))...((((((....((((.....(((......)))......)))).........((((.(((.....)))))))...........))))))............	2	0	0	-105.1	56	23	100	162	43
8	pda-3p-241095_26	CGAGUGUUCCUAUGUUUAUCUGU	-	4022	4169	1	23	148	-81.3	36	7	17	6	6	gp4a	23	26	865	826	1	gp4a	PDK_30s953341	-	4022	4169	caacagaUaaacaUaggaacacUcgaUcaUaUcaaaUcUccacaacaUaUcUUcaaaacUcaUcUUaUagcgcUUUUaUaaUaUgagUUcUgcagaUgUcUUgUgaagUUUUgaUaUgaUCGAGUGUUCCUAUGCUUAUCUGUUgagU	3'	36	36	0	36	30700	0	30700	29296	0	29296	0	y	((((((((((.(((((((((((((((((((((((((.((.(((((.((((((.((.(((((((.((((((.....)))))).))))))).)).)))))).))))).)).))))))))))))))))))))))))).))))))))))...	2	0	0	-81.3	63	22	100	145	5
822	pda-5p-192728_37	UCCCCUGGAGUUCCCUCAAGC	-	9273	9388	0	21	116	-58.7	26.5	7.5	0	19	0	gp4a	21	37	783	783	0	gp4a	PDK_30s1026031	-	9273	9388	caagUUggcUgUCCCCUGGAGUUCCCUCAAGCacUUcaUUagggcUcgUccacgUacUgcUggggagccaaaaUcUacUgaagUgUUUggaggaacUccgggUgccacUcaacaUa	5'	53	26.5	26.5	0	24197.5	24197.5	0	24197.5	24197.5	0	0	y	...((((..((...(((((((((((..(((((((((((.((((((((.((((.(.....)))))))))).....))).)))))))))))..)))))))))))...))..))))...	4	0	0	-58.7	41	16	100	110	5
R17	pda-5p-192728_37-R17	UCCCCUGGAGUUCCCUCAAGC	-	422	533	0	R	112	-66.1	26.5	7.5	0	19	0	gp4a	R	37	783	783	0	gp4a	PDK_30s1086571	-	422	533	caagUUggcUgUCCCCUGGAGUUCCCUCAAGCacUUcaUUagggcUcgUccacUgUUggggagccaaaaUcUacUgaagUgUUUgggggaacUccgggUgccacccaacaUa	5'	53	26.5	26.5	0	24197.5	24197.5	0	24197.5	24197.5	0	0	y	...(((((.((...((((((((((((((((((((((((.((((((((.((((....))))))))).....))).))))))))))))))))))))))))...)).)))))...	0	0	0	-66.1	43	18	100	106	4
361	pda-3p-173080_44	AAAUACAAAUAAAGAAAGAACUUUGCUGACAAU	-	57	239	0	33	183	-66.8	904	433	52	367	52	gp4a	33	44	1258	1258	0	gp4a	M01000072570	-	57	239	caaUccgUUgaccUcccagagUacUaUgcUUgUUaUgaagUUcUUUcUUUaUUUgUaUUUgUUcUUUaUUUaaUUUaaaUUUUUaaUUUaUUUcUaUaaagaacAAAUACAAAUAAAGAAAGAACUUUGCUGACAAUUaUagUaUUUUUgUcUggUcggaagagUccUUcUaaUaUUcUggUc	3'	904	904	740	164	956862	758457	198405	951405	758457	192948	0	y	.........((((..((((((((((((..(((((..(((((((((((((((((((((((((((((((((......((((((...)))))).....)))))))))))))))))))))))))))))))))...)))))..))))))).....)))))..(((((....)))))........))))	5	1	1	-66.8	56	29	100	140	3
R21	pda-5p-233999_27-R21	AAAGCGUCGGCGUACUUGAACCGA	+	111054	111244	0	R	191	-92.1	15	1.5	1.5	9.5	2.5	gp4a	R	30	885	885	0	gp4a	PDK_30s741891	+	111054	111244	cagacgUcgggcaggUgggcgUgggUcgggUUUaacccgacgUgUcgaaaaagcgUcgUcgaUcUaUgccgacgcUUUUaaacgUUcaUgUUaUaggaacccgacgcUUaAAAGCGUCGGCGUACUUGAACCGAcgcUUcccaccgUaggUUgggUUggacUaUgccgacgcUUaaaagcaUcggcgUaUg	3'	30	15	15	0	13275	13275	0	13275	13275	0	0	y	...(((((((((...(..((((.(((..(((..((((((((.((.((...((((((((((((..(((((((((((((((((.((((...(((.....)))..)))).))))))))))))))))).))))..)))))))).....)))).))))))))..)))..))).))))..)...)).)))))))...	3	2	2	-92.1	68	21	100	185	5
409	pda-5p-458916_10	UCGGAUUUUGGUACCGAACUGGUACGGUACA	+	77145	77281	0	31	137	-58.6	10	1	4	0	5	gp4a	31	10	1145	1145	0	gp4a	PDK_30s909601	+	77145	77281	caUaUCGGAUUUUGGUACCGAACUGGUACGGUACAaUagUUccgUaccaUccgaUUcgacUgaUUgUcggUaUgacaUccaUaUcggaUUcUggUaccgaacUggUacggUacaaUagUUccgUaccaUccgaUUcU	5'	10	10	10	0	11450	11450	0	11450	11450	0	0	y	...((((((...((((((.((((((((((.((((..((((((.(((((((((((..((((.....)))).((((.....)))))))))...)))))).)))))))))).))))..)))))).))))))))))))...	3	3	2	-58.6	43	25	100	131	29
860	pda-5p-115656_85	UCCGCGGGCGCUAGCCAACCG	-	119	180	1	21	62	-47.1	85	9	5	68	3	gp4a	21	85	785	747	1	gp4a	M01000089686	-	119	180	caUCCGCGGGCGCUGGCCAACCGUgUccgcUgUcagcggacgcaUgccagcgUccgcgggcc	5'	85	85	0	85	66725	0	66725	63495	0	63495	0	y	..(((((((((((((((.....((((((((.....))))))))..)))))))))))))))..	7	3	1	-47.1	23	16	100	58	5
920	pda-5p-362724_14	CACCACGCCAAUCACCCACAUC	-	22384	22522	0	22	139	-70.2	14	0	1	13	0	gp4a	22	14	836	836	0	gp4a	PDK_30s1198071	-	22384	22522	caUgcaccaaUaUggUUgUgCACCACGCCAAUCACCCACAUCcUUcUUaUgggcUccaUUcaUcaUgcgcUccUcUcagUaaUUggcccagaggaagaagaUgUggUgaUUgacaUggUgcaUggccaUgUggUgcaUa	5'	14	14	14	0	11704	11704	0	11704	11704	0	0	y	.(((((((.(((((((..(((((((...((((((((.(((((((((((.((((((.(((.....))).(((......)))....)))))).))))))..)))))))))))))...)))))))..)))))))))))))).	6	1	1	-70.2	46	18	100	137	29
685	pda-3p-259371_23	CGAGCGACUGUGAUUGGUGGC	+	28804	28987	0	21	184	-115.6	11.5	1.5	0.5	9	0.5	gp4a	21	23	782	782	0	gp4a	PDK_30s797211	+	28804	28987	ccaagaaaUUaUacccUacacUgcgUgcaccaUgUggcUgUgcaUgccaccaaUUacaaccgcUcgUUUcUgUagcagUacaUUgaUaUgcaUgcUUgaUgaaUggggcccacaggaaCGAGCGACUGUGAUUGGUGGCgUgcacggccacgUggUacacacaaUgUagggUaUaaUUUUUcaa	3'	23	11.5	11.5	0	8993	8993	0	8993	8993	0	0	y	...(((((((((((((((((.((.(((.((((((((((((((((((((((((((((((..(((((((((((((.((....((((.((...........)).))))..))..)))))))))))))..)))))))))))))))))))))))))))))).))).)).)))))))))))))))))...	4	0	0	-115.6	73	19	100	178	11
62	pda-5p-195988_36	AAGUGAAGUCGGCAAACUCUUUGC	-	16963	17174	0	24	212	-123.6	36	10	0	26	0	gp4a	24	36	888	888	0	gp4a	PDK_30s906991	-	16963	17174	ccgccUccggUUUUUcUgUUUgUUcgaaaUaggggUcUcggaggggccUUUUUaUUaUcacgaUUUUUAAGUGAAGUCGGCAAACUCUUUGCccacUUcacUUaaUUUaaUaaaaaaUggcaaagggUUUgcUgacUUcacUUaaaaaUUaUgaaaaUaaaaagcggcccUaUcUaggaccUUUgUUUcgagcaaaacaggagaaUcggagg	5'	36	36	36	0	31968	31968	0	31968	31968	0	0	y	...((((((((((((((((((((((((((((..(((((..((((((((((((((((.(((..(((((((((((((((((((((((((((((((.........................)))))))))))))))))))))))))))))))..))).))))))))..)))))).))..)))))..))))))))))))).)))))))))))))))	0	0	0	-123.6	83	24	100	209	25
851	pda-5p-300513_19	UUAAGUUAAAGUCGGCAAACC	+	25575	25697	0	21	123	-61.3	19	3	2	14	0	gp4a	21	19	787	787	0	gp4a	PDK_30s708971	+	25575	25697	ccUUUUUUaUUUUUgagaaUUUUAAGUUAAAGUCGGCAAACCcaUUgcaaaaUUcUcaaUggUUUaUagUagUUggcaaUgggUUUgcUgacUUUcacUUaaaaUUcUcaaaaaUaaaaggac	5'	19	19	19	0	14953	14953	0	14953	14953	0	0	y	(((..((((((((((((((((((((((.((((((((((((((((((((......((...........))......)))))))))))))))))))).)))))))))))))))))))))))))..	2	0	0	-61.3	47	20	100	121	11
923	pda-5p-83202_144	ACCAGUCCGAGAAUCGUUUCAAUC	+	7158	7356	0	24	199	-137.9	200	63	19	103	15	gp4a	24	144	895	895	0	gp4a	PDK_30s688561	+	7158	7356	cgaagaUaaUagUaUgUcgccgcUgUUccacUaaUcaUUaccaUgaUcUaUUUUgACCAGUCCGAGAAUCGUUUCAAUCaaacUaUgaUUccagaUggUccUUcaccUUcUgUcaUcgUagUUUggUggaaacgaUUUUcgaaUUggUcaaaaUggaUaUggUAAUGAUUAGUGGAACAGCGGcgacaUacUaUUaUUU	5'	231	200	200	0	178148	178148	0	178148	178148	0	0	y	...((((((((((((((((((((((((((((((((((((((((((.(((((((((((((((.(((((((((((((.(((((((((((((..((((.(((.....))).))))..))))))))))))).))))))))))))).)))))))))))))))))))))))))))))))))))))))))))))))))))))))))	2	0	0	-137.9	90	22	100	196	5
92	pda-3p-290154_20	UAAUGAUUAGUGGAACAGCGG	+	7158	7356	0	21	199	-137.9	31	7	1	21	2	gp4a	21	20	781	781	0	gp4a	PDK_30s688561	+	7158	7356	cgaagaUaaUagUaUgUcgccgcUgUUccacUaaUcaUUaccaUgaUcUaUUUUgACCAGUCCGAGAAUCGUUUCAAUCaaacUaUgaUUccagaUggUccUUcaccUUcUgUcaUcgUagUUUggUggaaacgaUUUUcgaaUUggUcaaaaUggaUaUggUAAUGAUUAGUGGAACAGCGGcgacaUacUaUUaUUU	3'	231	31	31	0	25619	25619	0	25619	25619	0	0	y	...((((((((((((((((((((((((((((((((((((((((((.(((((((((((((((.(((((((((((((.(((((((((((((..((((.(((.....))).))))..))))))))))))).))))))))))))).)))))))))))))))))))))))))))))))))))))))))))))))))))))))))	2	0	0	-137.9	90	22	100	196	5
338	pda-3p-437970_11	UCGCCUGCUGCAGCCUCCGCC	+	66205	66300	0	21	96	-68.3	11	1	1	9	0	gp4a	21	11	769	769	0	gp4a	PDK_30s806321	+	66205	66300	cgacggaggccgcggUaggUgaggccgcgacaggaccUcUgggUUcaUUcgaaacaggagaaccgaUcgcggccUCGCCUGCUGCAGCCUCCGCCa	3'	11	11	11	0	8459	8459	0	8459	8459	0	0	y	...(((((((.(((((((((((((((((((..((..((((...(((....)))...))))..))..))))))))))))))))))).)))))))...	2	0	0	-68.3	35	18	90	90	4
142	pda-3p-261846_23	AGUCGACUCUGAACUUUCAGGAGU	-	1194	1292	0	24	99	-47.4	37	5	0	30	2	gp4a	24	23	904	904	0	gp4a	PDK_30s1148421	-	1194	1292	cgggagUcagcUcgUgaacagUaggagUcgacUcgagcacUgUUccUUgaaacUccagagUgccagAGUCGACUCUGAACUUUCAGGAGUcgacUcgag	3'	37	37	37	0	33280	33280	0	33280	33280	0	0	y	...(((((..(((.((((.(((.(((((((((((..(((((.....(((......))))))))..)))))))))))..))))))).)))..)))))...	3	1	2	-47.4	34	20	100	93	6
242	pda-3p-339262_16	GUGGAGUCCUACUCUGGCCC	+	56361	56483	0	20	123	-85.8	16	0	8	4	4	gp4a	20	16	734	734	0	gp4a	PDK_30s807021	+	56361	56483	cgUcggaggggccccgaagggccggagcaggggcUcUgcccUUcggacccUgUUUUgUUcgaaacagUgUagggaUccgaaggGUGGAGUCCUACUCUGGCCCUUcgaaaUccccaUccgcUa	3'	16	16	16	0	11744	11744	0	11744	11744	0	0	y	.(.((((((((...(((((((((((((..(((((((..((((((((((((((..(((((...)))))..))))).)))))))))..))))))).)))))))))))))....)))).)))))..	4	1	1	-85.8	48	17	100	120	3
398	pda-5p-48683_330	AAGGGAAGUCGGCAAAACG	-	1339	1491	1	19	153	-76.7	165	15	27.5	100.5	22	gp4a	19	330	698	662	1	gp4a	PDK_30s849041	-	1339	1491	cgUgaaaaaaaUUUggagaUUUUUAAGUGAAGUCGGCAAAACGUUUgccaacUUUacUUaaaaaUUccaaaaUUaaaaaaaUUaaaaaaUUUUUaagUgaagUUggcaagUgaUUUgccgaUUUcaUUUaaaaaUcUUUaaaUUUUUUUccgc	5'	330	165	0	165	115170	0	115170	109230	0	109230	0	y	((.(((((((((((..((((((((((((((((((((((((.(..((((((((((((((((((((((....((((.....))))....))))))))))))))))))))))..).))))))))))))))))))))))))..))))))))))))).	2	0	0	-76.7	64	17	100	152	5
322	pda-5p-295079_19	AGGAGCUUUGGAGUGAGCCGGCCC	+	10526	10696	0	24	171	-115.5	19	8	0	11	0	gp4a	24	19	884	884	0	gp4a	PDK_30s1013541	+	10526	10696	cUaUaUUcaUaaaUagcUaggAGGAGCUUUGGAGUGAGCCGGCCCgaaUcccaUaaggagaaaaaaagaccUcagcUgaaaaaaaggaaUUacUgaggUcUUUUUUUUacUcccUaUgggAUUCGGGCCAGUCCACUCUAAAGCUccUccUaggUaUUUaUgaaUaUacac	5'	126	19	19	0	16796	16796	0	16796	16796	0	0	y	.((((((((((((((.((((((((((((((((((((..(.(((((((((((((((.(((((((((((((((((((.(((..........))))))))))))))))))..)))).))))))))))))))).)..)))))))))))))))))))).))))))))))))))...	4	0	0	-115.5	72	21	100	167	10
17	pda-3p-99813_107	AUUCGGGCCAGUCCACUCUAAAGC	+	10526	10696	0	24	171	-115.5	107	31	0	76	0	gp4a	24	107	888	888	0	gp4a	PDK_30s1013541	+	10526	10696	cUaUaUUcaUaaaUagcUaggAGGAGCUUUGGAGUGAGCCGGCCCgaaUcccaUaaggagaaaaaaagaccUcagcUgaaaaaaaggaaUUacUgaggUcUUUUUUUUacUcccUaUgggAUUCGGGCCAGUCCACUCUAAAGCUccUccUaggUaUUUaUgaaUaUacac	3'	126	107	107	0	95016	95016	0	95016	95016	0	0	y	.((((((((((((((.((((((((((((((((((((..(.(((((((((((((((.(((((((((((((((((((.(((..........))))))))))))))))))..)))).))))))))))))))).)..)))))))))))))))))))).))))))))))))))...	4	0	0	-115.5	72	21	100	167	10
567	pda-5p-264205_23	UUUUUGCAAUAAUGCCCCUUC	+	7724	7873	0	21	150	-58.4	23	0	1	22	0	gp4a	21	23	771	771	0	gp4a	PDK_30s858831	+	7724	7873	cUcaaUUcacccUaUUUUUGCAAUAAUGCCCCUUCcaUUUgggaUaUUgaUgcaaaaggUUaacaaagUcaUUUUaUacUcaaUaUgggaacaccaUcaaUcaaaaaaUcUaaUagaaggggcacUgUUgcaaaagUagggUgaaUUaaa	5'	23	23	23	0	17733	17733	0	17733	17733	0	0	y	...((((((((((((((((((((((.(((((((((...(((((...(((((...............(((........)))....((((.....))))..)))))....)))))..))))))))).))))))))))))))))))))))...	2	0	0	-58.4	41	20	100	144	48
681	pda-3p-132860_68	AGUACUCGGCUGAUGUACUCCGCC	-	2259	2422	1	24	164	-98.3	112	16	5	87	4	gp4a	24	68	886	850	1	gp4a	M01000016599	-	2259	2422	cUccggaggUacaUcagccgagUacUcaggagaUUcUgcaUggaggaUgaaagcUUUaagUgggcaccUagUggUgUgccaacaggUUUggcacccUccaUgcagaaUcUcUUgAGUACUCUGCUGAUGUACUCCGCCUgagaUagUcUgaggaUaUgUUUaga	3'	112	112	10	102	100940	9260	91680	97260	9260	88000	0	y	...((((.((((((((((.(((((((((((((((((((((((((((.((.((((((....((((((((....))))).)))..))))))..)).))))))))))))))))))))))))))).))))))))))))))(((.((.....)).)))...........	2	1	1	-98.3	57	23	91	133	4
459	pda-3p-224491_29	AGGCUUCUGUUCGGCGAUCCAGUG	+	86199	86293	0	24	95	-70.8	82	15	1	62	4	gp4a	24	29	888	888	0	gp4a	PDK_30s1074861	+	86199	86293	cUCCGUUCGGCACUGGAUCGCCgaacaaaaUgcUUcUgUUcggcUgaacggUgccgaacagaAGGCUUCUGUUCGGCGAUCCAGUGccgaacaga	3'	521	82	82	0	69824	69824	0	69824	69824	0	0	y	....(((((((((((((((((((((((.((.(((((((((((((........))))))))))).)))).)))))))))))))))))))))))...	0	0	0	-70.8	38	18	85	88	8
660	pda-5p-58294_251	UCCGUUCGGCACUGGAUCGCC	+	86199	86293	0	21	95	-70.8	439	100	24	280	35	gp4a	21	251	779	779	0	gp4a	PDK_30s1074861	+	86199	86293	cUCCGUUCGGCACUGGAUCGCCgaacaaaaUgcUUcUgUUcggcUgaacggUgccgaacagaAGGCUUCUGUUCGGCGAUCCAGUGccgaacaga	5'	521	439	439	0	355017	355017	0	355017	355017	0	0	y	....(((((((((((((((((((((((.((.(((((((((((((........))))))))))).)))).)))))))))))))))))))))))...	0	0	0	-70.8	38	18	85	88	8
613	pda-3p-5998_4496	AGUCGACUCGACUGUAGCUCGAGU	+	6	93	0	24	88	-49.7	4509	711	165	3476	157	gp4a	24	4496	886	886	0	gp4a	M01000007369	+	6	93	cUccUcUcgggUcgacUcgacgagccUcgagUcgacUcgacUgUUcccgAGUCGACUCGACUGUAGCUCGAGUcgacUccgacagUcc	3'	4509	4509	4509	0	3994311	3994311	0	3994311	3994311	0	0	y	...((.((((((((((((((...((.(((((((((((((........)))))))))))))..))...)))))))))).)))).))...	6	1	1	-49.7	31	19	100	82	8
80	pda-5p-438543_11	UUAACCGGACUCGGUGCGAACCGA	+	47203	47289	1	24	87	-46.5	11	0	2	8	1	gp4a	24	11	885	846	1	gp4a	PDK_30s939551	+	47203	47289	cUcgaUgcaaaccggUcaaUUUAACCGGACUCCGUGCGAACCGAUcggUUcgcaccgagUccUggcUgaacgUccggUUUcgUccgg	5'	11	11	0	11	9735	0	9735	9306	0	9306	0	y	...((((.(((((((....((((.((((((((.(((((((((....))))))))).)))))).)).))))...)))))))))))...	2	1	1	-46.5	32	20	91	81	4
264	pda-5p-223801_29	ACCGGCCGGUACUGUACCGAUACC	+	17818	17899	0	24	82	-54.4	29	5	0	21	3	gp4a	24	29	884	884	0	gp4a	PDK_30s65509124	+	17818	17899	cUcgcggUACCGGCCGGUACUGUACCGAUACCggccggUacgUaccggaccggaccggUaccgUaccggUccggcccgccac	5'	29	29	29	0	25636	25636	0	25636	25636	0	0	y	...((((..(((((((((((.((((((...(((((((((....))))).))))..)))))).))))))).)))).))))...	5	1	2	-54.4	30	19	100	76	4
115	pda-3p-444722_11	AGACCGCGGUCGGACCUUAUUUCG	-	191499	191653	0	24	155	-85.5	26	8	2	15	1	gp4a	24	11	924	924	0	gp4a	PDK_30s1103751	-	191499	191653	cUgcUgcUcUccUgUUUcgaacgaaaUagggUccggcUgcagUcUUaaaaaaaUUcgUgaUUUgUaagUaaagUcggcaaaUcgcUUUUcUUaaaaaUUgUgaaUUUUUUUaAGACCGCGGUCGGACCUUAUUUCGUUcaaaaUaggggcagnnn	3'	26	26	26	0	19284	19284	0	19284	19284	0	0	y	...((((.(.(((((((.((((((((((((((((((((((.((((((((((((((((..((((.((((.((((.(((....))))))).)))).))))..)))))))))))))))).)))))))))))))))))))))).))))))))))))...	2	0	0	-85.5	65	23	100	149	4
814	pda-5p-181586_41	UUAUAACUACAGAUUUUCCA	-	42936	43137	0	20	202	-110.5	73	15	7	46	5	gp4a	20	41	742	742	0	gp4a	PDK_30s65509108	-	42936	43137	cUggaaaUgaaaaaagcUUUggaUUaUagaggagagcUcUUgcaUUUaUgccaUgUUUUUUcUUAUAACUACAGAUUUUCCAagacacaUgUUUUUUcUUaUaagUacagaUUUUccaagUcUUggaaaaUcUgUagUUaUgagaUaaaacacggUaUaaaUgcaagagcUcUUcUUcaUcaUccaaagUUUUUUUcacUUc	5'	73	73	73	0	55296	55296	0	55296	55296	0	0	y	...(((.(((((((((((((((((.((..(((((((((((((((((((((((.((((((.((((((((((((((((((((((((((...((.....(((.........))).....)).)))))))))))))))))))))))))).)))))).)))))))))))))))))))))))..)).))))))))))))))))).)))	0	0	0	-110.5	82	20	100	199	9
558	pda-5p-264380_23	AAGGCACAAUCUGUUCCACUCGGA	+	5257	5445	0	24	189	-107	39	19	2	8	10	gp4a	24	23	894	894	0	gp4a	PDK_30s829871	+	5257	5445	cUUcaaaaggcgUcUcUgggaggaaggggUgUUgUcccUccaUUUAAGGCACAAUCUGUUCCACUCGGAaggUaaUaUUaggggUgUaaagggagUccacaaaccUUUagUcccaUaUcggUUgagUagUgaaaagaaUUgUgccUUaaaUggaggaacaacacUcUUUccUccUagaggcgcUUUUUg	5'	39	39	39	0	35122	35122	0	35122	35122	0	0	y	...((((((((((((((((((((((((((((((((.(((((((((((((((((((((.(((.(((((...((((.......(((..((((((...........))))))..))).))))...)))))...))).)).))))))))))))))))))).))))))))))))))))))))))))))))))))	4	2	2	-107	74	20	100	186	11
165	pda-5p-178899_42	AGCACGCCGGUCGGCAGUCAUGCA	-	6524	6657	0	24	134	-74.2	47	11.5	5.5	27	3	gp4a	24	42	888	888	0	gp4a	PDK_30s715261	-	6524	6657	cUUggUgcUUUggccggcgUggUUggcUgacaacgagagagAGCACGCCGGUCGGCAGUCAUGCAaggUgccaUggcUgUgUacUagcGUGCUCUUUCUCGUUGUCACCccagUUcUccccacaaagcaUcUcc	5'	693	47	47	0	44149	44149	0	44149	44149	0	0	y	...(((((((((...((..(((..((.(((((((((((((((((((((..((..((((((((((.....).)))))))))..))..)))))))))))))))))))))))))).....))...)))))))))...	4	1	1	-74.2	49	19	95	128	5
793	pda-3p-64787_213	GUGCUCUUUCUCGUUGUCACC	-	6524	6657	0	21	134	-74.2	316.5	30.5	9.5	264.5	12	gp4a	21	213	779	779	0	gp4a	PDK_30s715261	-	6524	6657	cUUggUgcUUUggccggcgUggUUggcUgacaacgagagagAGCACGCCGGUCGGCAGUCAUGCAaggUgccaUggcUgUgUacUagcGUGCUCUUUCUCGUUGUCACCccagUUcUccccacaaagcaUcUcc	3'	693	316.5	182.5	134	262894	160542	102353	257748	160542	97207	0	y	...(((((((((...((..(((..((.(((((((((((((((((((((..((..((((((((((.....).)))))))))..))..)))))))))))))))))))))))))).....))...)))))))))...	4	1	1	-74.2	49	19	95	128	5
21	pda-5p-217347_31	CCUGAAUCUGGUCUUUUGGUG	+	132	291	0	21	160	-82.1	21	2.5	0	17.5	1	gp4a	21	31	778	778	0	gp4a	M01000073758	+	132	291	cUUUgUgggUggaUUcUcgCCUGAAUCUGGUCUUUUGGUGggUUcUgaUgUUUgaaUaagUagaaUcggaacgaaUUgUggUUgUgaacUagaUggggagUcaaUggUUacUUUUgUUcacaaccaaaagaUcagaUUcaggcgagaaUccaUUcacacg	5'	42	21	21	0	16332.5	16332.5	0	16332.5	16332.5	0	0	y	...((((..((((((((((((((((((((((((((((((.(((((((.(((....)))..))))))).(((((((..((..(..(..(((........)))..)..)..)).)))))))...))))))))))))))))))))))))))))))..))))..	0	0	0	-82.1	34	20	95	155	83
R	pda-5p-217347_31-R5	CCUGAAUCUGGUCUUUUGGUG	+	215	374	0	R	160	-85.5	21	2.5	0	17.5	1	gp4a	R	31	778	778	0	gp4a	PDK_30s792191	+	215	374	cUUUgUgggUggaUUcUcgCCUGAAUCUGGUCUUUUGGUGggUUcUgaUgUUUgaaUaaUUagaaUcggaacgaaUUgUggUUgUgaacUagaUggggagUcaaUggUUacUUUUgUUcacaaccaaaagaUcagaUUcaggcgagaaUccaUUcacacg	5'	42	21	21	0	16332.5	16332.5	0	16332.5	16332.5	0	0	y	...((((..((((((((((((((((((((((((((((((.(((((((((.........))))))))).(((((((..((..(..(..(((........)))..)..)..)).)))))))...))))))))))))))))))))))))))))))..))))..	0	0	0	-85.5	34	20	95	155	83
477	pda-5p-266573_22	UCCAAAGCGUCGGAAAAGGUU	-	41269	41351	1	21	83	-43.5	22	4	0	16	2	gp4a	21	22	783	751	1	gp4a	PDK_30s918061	-	41269	41351	cUUUUccaacgcUaaCCCAAAGCGUCGGAAAAGGUUggcgcUgagccaaacUUUaccgacgcUUUccccUagcgUcggaaaaa	5'	22	22	0	22	17226	0	17226	16522	0	16522	0	y	.((((((.((((((....((((((((((.((((.(((((.....))))).)))).))))))))))....)))))).)))))).	2	0	0	-43.5	31	16	100	81	5
746	pda-5p-148449_56	UUUUGCUGAUGGUCAUCUAAUC	+	10212	10344	0	22	133	-61.1	56	2	4	49	1	gp4a	22	56	822	822	0	gp4a	PDK_30s920241	+	10212	10344	gaagUaUgcagcUUUgaaUgUgUUUUGCUGAUGGUCAUCUAAUCaUcUUcaaaUcUUcUcUUccccUcUUUaaUUUgaagcgUgaagacaUggUUagaUgaccaUcagcaaacgcaUUcacaagacaUgcaca	5'	56	56	56	0	46032	46032	0	46032	46032	0	0	y	...(((((...(((((((((((.((((((((((((((((((((((((((((...((((..................))))..))))))..)))))))))))))))))))))))))))))).))).)))))...	0	0	0	-61.1	48	21	100	127	18
879	pda-3p-472966_10	AGUCGACUCCGAAACAUUACGAGU	-	3196	3308	1	24	113	-56.3	10	2	1	7	0	gp4a	24	10	904	864	1	gp4a	PDK_30s874051	-	3196	3308	gaaUagUccUcgagUcgacUcUUgaaagUUcagagUcgacUcUggcacUcUgaagUUUcaaggaacagUgcUcgAGUCGACUCCGAAACUUUACGAGUcgacUccgacUgaga	3'	10	10	0	10	9040	0	9040	8640	0	8640	0	y	...(((((...((((((((((.((((..(((.((((((((((..(((((.....((((....)))))))))..)))))))))).)))..)))).)))))))))).)))))...	4	0	0	-56.3	41	20	100	107	4
829	pda-3p-258784_23	AAGAUGGAUGAUAUGGCAGCUAUC	-	552	697	1	24	146	-64.1	23	7	0	16	0	gp4a	24	23	895	855	1	gp4a	PDK_30s989681	-	552	697	gaaUagUcgccaUaUcaUUcaUcUcagagaUagacaUgUcUUccUcaUcUgagacaUaUUUUgUgUaUgcaUggagcgUgaUgcUcggaUccaUgcaaUgagUagcagcUgUccaUcUUcAAGAUGGAUGAUAUGGCGGCUAUCca	3'	23	23	0	23	20585	0	20585	19665	0	19665	0	y	..((((((((((((((((((((((..(((((.((((((.((..((((......((((.....)))).((((((((.((.......))..)))))))).)))).))))..)))).)))))..))))))))))))))))))))))...	0	0	0	-64.1	39	22	95	141	51
716	pda-5p-243982_26	AACCCGUUUAACUGUUGGGCAGGU	+	6105	6194	0	24	90	-41.3	13	5.5	0.5	7	0	gp4a	24	26	884	884	0	gp4a	PDK_30s6550934	+	6105	6194	gacccgUUUaaaccgUUUAACCCGUUUAACUGUUGGGCAGGUUaaacaggUcUaaacaggUUaaacgggUUacacaggUUaaacaggUcU	5'	26	13	13	0	11492	11492	0	11492	11492	0	0	y	((((.((((.((((((.(((((((((((((((((((((..(.....)..)))).)))).))))))))))))).)).)))))))).)))).	4	1	2	-41.3	36	21	95	89	5
183	pda-5p-266719_22	ACGUUGGUUUUAACUUGGCUCACC	-	7829	8024	0	24	196	-178.8	66	6	7	44	9	gp4a	24	22	894	894	0	gp4a	PDK_30s65509243	-	7829	8024	gacUagaaccaaccccgaUUgUUUUcccgggcUcacaaUcaaacccUUacaUACGUUGGUUUUAACUUGGCUCACCaacccaccUUaaaccccUUgaUUgaaUcaaggggUUUaaggUUggUUggUgagccaagUUaaaaccaacgUgUgUaagggUUUgaUUgUgagcccgggaaaacaaUUggggUUggUUcUa	5'	66	66	22	44	57814	19668	38146	56387	19668	36719	0	y	...(((((((((((((((((((((((((((((((((((((((((((((((((((((((((((((((((((((((((((((.(((((((((((((((((...))))))))))))))))).)))))))))))))))))))))))))))))))))))))))))))))))))))))))))))))))))))))))))))))	0	0	0	-178.8	94	24	100	193	3
281	pda-5p-360119_14	AGGAAGAGCUCCGCCUUGGUUUCC	+	42427	42603	0	24	177	-102.5	14	5	1	8	0	gp4a	24	14	911	911	0	gp4a	PDK_30s888301	+	42427	42603	gagaggaaaagagggagggagggggagggccggAGGAAGAGCUCCGCCUUGGUUUCCcUgUUUUgaaUgaaacaUggaccUcUUUUUaUUUUgaUgUgUUUaagcgaagUcgUUcaagaUaggUgaaccgagggcagagcccUUccUccggcccUccUcUagccUccUcUagUccUg	5'	14	14	14	0	12754	12754	0	12754	12754	0	0	y	...((((..(((.(((((..(((((((((((((((((((.((((.(((((((((..(((((((((((((((((((....................))))).........))))))))))))))..)))).))))).)))).)))))))))))))))))))..))))))))..)))).	4	1	1	-102.5	63	20	100	173	20
312	pda-5p-396570_13	AGAGUCGUGCGGUCUACAGAG	-	7145	7301	0	21	157	-80.3	37	0	0	36	1	gp4a	21	13	791	791	0	gp4a	PDK_30s742991	-	7145	7301	gaggagaagaUaUcUcgccUcgUcgaaacgaAGAGUCGUGCGGUCUACAGAGaUccacgccUUcUgaUcUcaaagccUcUcaggUgcUUUgagagagagaUgUgcUcUcUcUCUGUAAACCGCACGACCCUUCgUUgcggcgagcgaUUUUUUcagU	5'	3762	37	37	0	28367	28367	0	28367	28367	0	0	y	...(((((((....(((.(((((((.(((((((.((((((((((.((((((((..((((..((((..(((((((((((....)).))))))))).)))).)))).....)))))))).)))))))))).))))))).)))))))))))))))))...	2	0	0	-80.3	61	19	100	151	4
105	pda-3p-8373_3137	CUGUAAACCGCACGACCCUUC	-	7145	7301	0	21	157	-80.3	3725	178	88	3426	33	gp4a	21	3137	781	781	0	gp4a	PDK_30s742991	-	7145	7301	gaggagaagaUaUcUcgccUcgUcgaaacgaAGAGUCGUGCGGUCUACAGAGaUccacgccUUcUgaUcUcaaagccUcUcaggUgcUUUgagagagagaUgUgcUcUcUcUCUGUAAACCGCACGACCCUUCgUUgcggcgagcgaUUUUUUcagU	3'	3762	3725	3725	0	2896190	2896190	0	2896190	2896190	0	0	y	...(((((((....(((.(((((((.(((((((.((((((((((.((((((((..((((..((((..(((((((((((....)).))))))))).)))).)))).....)))))))).)))))))))).))))))).)))))))))))))))))...	2	0	0	-80.3	61	19	100	151	4
648	pda-5p-239350_26	CAUGAAGGAUCAUCUCUGCUUUACU	+	389	630	0	25	242	-240.4	26	22	2	1	1	gp4a	25	26	953	953	0	gp4a	M01000001807	+	389	630	gagggaacUaUUgUggagaagcUcgUUggUgcUcacaaagaUgaUcUgccgaagaagaUUgagcUgcacaUggcccagUgagggcUcccUcaUgUUUCAUGAAGGAUCAUCUCUGCUUUACUgUgUacUgcagagaUgaUccUUcaUgaaacaUgagggagcccUcacUgggccaUgUgcagcUcaaUcUUcUUcggcagaUcaUcUUUgUgagcaccaacgagcUUcUccacaaUagUUcc	5'	26	26	26	0	24778	24778	0	24778	24778	0	0	y	...(((((((((((((((((((((((((((((((((((((((((((((((((((((((((((((((((((((((((((((((((((((((((((((((((((((((((((((((((..(((...)))..)))))))))))))))))))))))))))))))))))))))))))))))))))))))))))))))))))))))))))))))))))))))))))))))))))))))))))))))))	4	0	0	-240.4	116	22	96	239	3
R9	pda-5p-52910_291-R9	ACUGCGGAAAAACUGUGUCGAAGU	+	365	492	0	R	128	-45.9	182.5	77.5	4.5	82	18.5	gp4a	R	291	900	900	0	gp4a	PDK_30s1103131	+	365	492	gagggagUUggacUUcaacaaagUUUUUUcgagACUGCGGAAAAACUGUGUCGAAGUcccaacUUcggUgaaUUaUUUUggaggUcaaUcggccUUcgaUgaUgAUGUAUCUUACUAUUUUGGAAACC	5'	338	182.5	182.5	0	163019	163019	0	163019	163019	0	0	y	...(((((((((((((.(((.((((((((((......)))))))))).))).))))))).)))))).(((((((((((((((((((....))))))))).)))))).....)))).............	2	0	0	-45.9	26	18	83	63	6
23	pda-3p-336513_16	ACCUCUGCCUCCUGCCCGGGCGCC	-	28491	28653	1	24	163	-132.9	16	3	0	13	0	gp4a	24	16	895	857	1	gp4a	PDK_30s1050311	-	28491	28653	gagggUgaaggaggccggcgcccgggcaggaggcagaggccgUggcUgggUcUccUgUUUUgUUcaaaaUaggagUccggcUgcUaaaaaaUUUcaaacgaaacagaagaccUggccgcgACCUCUGCCUCCUGCCCGGGCGUCggccUccgccacccUcccU	3'	16	16	0	16	14320	0	14320	13712	0	13712	0	y	(((((((..((((((((((((((((((((((((((((((.((((((..(((((.((((((((((..((((((.((.....)).))).....)))..)))))))))).)))))..)))))).))))))))))))))))))))))))))))))..)))))))...	0	0	0	-132.9	66	23	100	160	5
443	pda-3p-262764_23	CCGGAUCUCUGUUUCAAACGAAA	+	20722	20873	0	23	152	-100.5	23	1	0	20	2	gp4a	23	23	869	869	0	gp4a	PDK_30s754971	+	20722	20873	gcagaggaggccUcUgUagccggaUUcccUgUUUcgUUcgaagcaggggUccgaUcccUUUUUUaUUUcgUUUaaaaUUUgcgaaaUaaaaaaaggggCCGGAUCUCUGUUUCAAACGAAAUaggggacUcggccacggagcccUccUccgU	3'	23	23	23	0	19987	19987	0	19987	19987	0	0	y	((.(((((((.((((((.((((..((((((((((((((.((((((((((((((..((((((((((((((((.........))))))).)))))))))..)))))))))))))).))))))))))))))..)))).)))))).))))))).))	2	0	0	-100.5	63	21	100	152	9
189	pda-5p-61161_232	UCAGGAGAGAUGACACCGGCU	-	82263	82368	0	21	106	-58.5	259	0	32	218	9	gp4a	21	232	780	780	0	gp4a	PDK_30s805141	-	82263	82368	gcaggggUgggggaccUcUgUCAGGAGAGAUGACACCGGCUUcgaUcggUcUUccagcUcgaagcgagUgUcaUgUcUccggacaagggacccUcUUaacUccaUU	5'	259	259	259	0	202992	202992	0	202992	202992	0	0	y	...((((((((((.((..((((.(((((.(((((((..(((((((..((....))...)))))))..))))))).))))).))))..)).)))))...)))))...	4	0	0	-58.5	37	17	100	100	4
109	pda-3p-374825_14	AUGCGGACCCCAGAAUCGGACAA	-	39599	39830	0	23	232	-190.2	14	1	0	13	0	gp4a	23	14	866	866	0	gp4a	PDK_30s749041	-	39599	39830	gccccgccUccgUggggcacgUgcggcacccaaUgcccacgUgggggccacaUgaggggggaacacggggcUacccUgccaaaUaUUgUccggUUUcgaggcccgUacgcgUgUgcgcacAUGCGGACCCCAGAAUCGGACAAUaUcUagcaggggagcUccaUgUUUcUcccUcaUgUggcccccaUgUgggcacUgggUgccUcacgUgccccgUgcaggcggUggcgUg	3'	14	14	14	0	12124	12124	0	12124	12124	0	0	y	(((((((((.(..((((((((((.((((((((.((((((((((((((((((((((((((((((((.((((((.((((((...((((((((((((((...((.(((((.(((....)))...))))).))...))))))))))))))...)))))).)))))).)))))))))))))))))))))))))))))))).)))))))).))))))))))..).)))))).)))...	6	0	0	-190.2	96	18	100	229	4
517	pda-5p-482466_10	AGAGACAGGGUUCGAACUCAGAAUC	-	1204	1335	1	25	132	-69.8	10	2	1	5	2	gp4a	25	10	941	909	1	gp4a	PDK_30s861701	-	1204	1335	gcCGAGACAGGGUUCGAACUCAGAAUCUcUgcUUUgaUaccaUaUUgaaaUcaccacUUgUcaUaaaagcUUaagcUcaaUUggUgaUUUcaacaUggUaUcagagaUccUgagUUUgaaUUcUgUcUccaU	5'	10	10	0	10	9410	0	9410	9090	0	9090	0	y	...(((((((..(((((((((((.(((((.....(((((((((.((((((((((((.(((.......(((....)))))).)))))))))))).)))))))))))))).)))))))))))..)))))))...	4	0	0	-69.8	50	21	96	126	4
481	pda-5p-342543_16	UAAGUGAAGUCGGCAAAUUGC	+	83289	83533	0	21	245	-162.6	16	3	0	13	0	gp4a	21	16	761	761	0	gp4a	PDK_30s658041	+	83289	83533	gccggcggaggccacgaggagcaggcgaggUgcggccgaUUcUccUgUUUcgagcgaacgUUUgaaacaggggUccggccgcggcUaaaaaaUUUUgcgaUUUUUAAGUGAAGUCGGCAAAUUGCaaUUUcUaagaaaUUUgccgaUUUcacUUaaaaaacgcgaaaUUUUUUagccgUagccggaccccUgUUUUgUUUgaaacaagagaaccgacUgcagccUcgccUgcUgcgaccUccgcc	5'	16	16	16	0	12176	12176	0	12176	12176	0	0	y	...((((((((...((...((((((((((((((((.((.(((((.((((((((((........((((((((((((((((..((((((((((((((((((.(((((((((((((((((((((((.............))))))))))))))))))))))).))))))))))))))))))..)))))))))))))))))))))))))).))))).)).))))).))))))))))).)).))))))))	0	0	0	-162.6	100	19	90	242	13
574	pda-5p-85614_137	AGCUCCCUUGCCAGCUUUAGCCCG	+	2367	2589	0	24	223	-208.2	378	77.5	3	274	23.5	gp4a	24	137	895	895	0	gp4a	PDK_30s769101	+	2367	2589	gcUcccUUgcUUcgaaaUccUccaaaaUcUggcUcacgaccagUUgggagUcgcUgaagaccUUcaagUUcccgaccUUcAGCUCCCUUGCCAGCUUUAGCCCGgcgaUaagUgccUcaUacaUUgUUcgAGGCACUUAUCGCCGGGCUAAAGCUggcaagggagcUgaaggUcgggaacUUgaaggUcUUcagcgacUcccaacUggUcgUgagccagaUUU	5'	799	378	373	5	312912	309022	3890	312732	309022	3710	0	y	((......))..............((((((((((((((((((((((((((((((((((((((((((((((((((((((((((((((((((((((((((((((((((((((((((((((..((...))..))))))))))))))))))))))))))))))))))))))))))))))))))))))))))))))))))))))))))))))))))))))))))))))	0	0	0	-208.2	96	24	100	199	3
606	pda-3p-117840_82	AGGCACUUAUCGCCGGGCUAAAGC	+	2367	2589	0	24	223	-208.2	50	14	0	33	3	gp4a	24	82	897	897	0	gp4a	PDK_30s769101	+	2367	2589	gcUcccUUgcUUcgaaaUccUccaaaaUcUggcUcacgaccagUUgggagUcgcUgaagaccUUcaagUUcccgaccUUcAGCUCCCUUGCCAGCUUUAGCCCGgcgaUaagUgccUcaUacaUUgUUcgAGGCACUUAUCGCCGGGCUAAAGCUggcaagggagcUgaaggUcgggaacUUgaaggUcUUcagcgacUcccaacUggUcgUgagccagaUUU	3'	799	50	50	0	44850	44850	0	44850	44850	0	0	y	((......))..............((((((((((((((((((((((((((((((((((((((((((((((((((((((((((((((((((((((((((((((((((((((((((((((..((...))..))))))))))))))))))))))))))))))))))))))))))))))))))))))))))))))))))))))))))))))))))))))))))))))	0	0	0	-208.2	96	24	100	199	3
460	pda-3p-316346_17	AAUACCACUUUCCCAUCUCUCUCC	+	3357	3591	0	24	235	-231.7	17	5	2	4	6	gp4a	24	17	893	893	0	gp4a	PDK_30s1057761	+	3357	3591	gcUcgUUUggUUcgcaggaaaacgaggggggaaagUgUggUcaacgggaaagUaaUgaaaUgccUcUUgUUUggUUggagUUUUcaaaggagagagaUgggaaagUggUaUUcccaUgggAAUACCACUUUCCCAUCUCUCUCCUUUgaaaacUccaaccaaacaagaggcaUUUcaUUacUUUcccgUUgaccacacUUUccccccUcgUUUUccUgcgaaccaaacgagccca	3'	17	17	17	0	15181	15181	0	15181	15181	0	0	y	((((((((((((((((((((((((((((((((((((((((((((((((((((((((((((((((((((((((((((((((((((((((((((((((((((((((((((((((((....))))))))))))))))))))))))))))))))))))))))))))))))))))))))))))))))))))))))))))))))))))))))))))))))))))))))))))))))))...	0	0	0	-231.7	114	24	100	232	4
760	pda-3p-398802_13	AAUGAAUGAGAGUCGCCCGCCUCC	+	12304	12440	0	24	137	-65.8	13	3	0	10	0	gp4a	24	13	911	911	0	gp4a	PDK_30s841921	+	12304	12440	gcUgccaUgUUgUccaUcUUgcaggcgggUggcUcUUcUUcaUcaccgcaaUgUgcUgUgcaUcgcaUUaacgacgccUcaUcaUaUUccagaAAUGAAUGAGAGUCGCCCGCCUCCacgaUggcUgaUaUggcann	3'	13	13	13	0	11843	11843	0	11843	11843	0	0	y	..(((((((((..(((((.((.((((((((((((((..(((((......((((((.((.((.(((......))).))..)).))))))......)))))..)))))))))))))).)).)))))..)))))))))..	4	0	0	-65.8	48	20	100	133	6
449	pda-3p-35797_519	ACCCUUGUUUUGAAUGUCUGAAGG	+	24	186	0	24	163	-110.5	529	297	5	212	15	gp4a	24	519	903	903	0	gp4a	PDK_30s984351	+	24	186	gcUgUUggaggaggggcUcUgcccUUcagacaUUcgaaacaggggUccaUcgggccccaacUUUUaUUUUgcUgacUUcaccUaaagcUUacaaaaaUaaaaUgagggaUccgacggACCCUUGUUUUGAAUGUCUGAAGGgUggagcUccUccUccagcccU	3'	529	529	529	0	476877	476877	0	476877	476877	0	0	y	...((((((((((((((((..(((((((((((((((((((((((((((.((((..(((...(((((((((..((((((......))).)))..)))))))))...)))..)))).)))))))))))))))))))))))))))..))))))))))))))))...	0	0	0	-110.5	65	24	100	157	6
934	pda-3p-263356_23	UCAGAUCAUGUUGCAGUUUCAUC	-	12309	12463	0	23	155	-68.6	23.5	4.5	0	19	0	gp4a	23	23	857	857	0	gp4a	PDK_30s916831	-	12309	12463	gcUUUgaUggUaUgUggUgcaccacaagcagcUgaagcUgccagcaUgaUcUgaUcUcUcUUUUUcUUUcUUccagaUcUUggaUgaagaagaUgcaUaUCAGAUCAUGUUGCAGUUUCAUCUgcUgaUgggagcaccagaaaacccUacaaccc	3'	35	23.5	23.5	0	20223.5	20223.5	0	20223.5	20223.5	0	0	y	...(((..(((...((((((.(((..(((((.((((((((.((((((((((((((......((((((((..(((((...))))).)))))))).....)))))))))))))))))))))).)))))..)))..))))))....)))...)))...	2	1	1	-68.6	55	22	100	149	3
96	pda-5p-164396_48	AAAGCGUCGGAAAAGGUUGGC	-	59566	59650	0	21	85	-47.8	48	2	0	46	0	gp4a	21	48	782	782	0	gp4a	PDK_30s677011	-	59566	59650	gcUUUUccaacgcUaacccAAAGCGUCGGAAAAGGUUGGCUgUgagccaaccUUUgccgaUgcUUUccccUagcgUcggaaaaag	5'	48	48	48	0	37536	37536	0	37536	37536	0	0	y	..((((((.((((((....((((((((((.((((((((((.....)))))))))).))))))))))....)))))).))))))..	2	0	0	-47.8	32	20	100	81	5
859	pda-3p-217326_31	UUCGAACGAAACAGGAGACUCGCC	+	6149	6303	0	24	155	-101.6	15.5	5.5	0	10	0	gp4a	24	31	902	902	0	gp4a	PDK_30s980031	+	6149	6303	ggaaaacagggcgagUcUccUaUUUcgUUcgaaacaggagUcaggcccUUUUUUUaUUUUgUgaUUUUUaagUgaagUcggUaagcgaUUUgcaaaaUaaaaaaagggccUgacUccUaUUUCGAACGAAACAGGAGACUCGCCUUgUUUUUUgg	3'	31	15.5	15.5	0	13981	13981	0	13981	13981	0	0	y	.((((((((((((((((((((.((((((((((((.(((((((((((((((((((((((((((............((((((.....))))))))))))))))))))))))))))))))).)))))))))))).))))))))))))))))))))...	2	0	0	-101.6	65	23	100	151	5
380	pda-5p-253816_24	AAAAAGCCAGUACUGACGCCUUGC	+	14458	14663	0	24	206	-177.7	21	6.5	1	13.5	0	gp4a	24	24	908	908	0	gp4a	PDK_30s993561	+	14458	14663	ggcaUaUgcgggccaggcUUgUcccUcacccUUggcacUcccaccaaagaaUUaaaaUagUUAAAAAGCCAGUACUGACGCCUUGCagaggccccccgacUcaUggUgagUggaggcUccUcUgcaaggcgUcagUacUggcUUUUUaacUaUUUUaaUUcUUUggUgggagUgccaagggUgagggaUaagccUgacUUgcaUaU	5'	42	21	12	9	18924	10896	8028	18600	10896	7704	0	y	...((((((..(.((((((((((((((((((((((((((((((((((((((((((((((((((((((((((((((((((((((((((((((..((((.((((.....)))))).))..)))))))))))))))))))))))))))))))))))))))))))))))))))))))))))))))))))))))))))))).)..))))))	0	0	0	-177.7	93	24	100	203	5
367	pda-5p-2741_10004	GGGAUGGGGCUGGUUUGGAAAAC	-	26901	27077	0	23	177	-86.7	10383	2044	119	8150	70	gp4a	23	10004	855	855	0	gp4a	PDK_30s668091	-	26901	27077	gggaagagggaUUgggggaaggggagccggUUcUcUcgaagccUUUGGGAUGGGGCUGGUUUGGAAAACgcUcUcUccUUUacgUUccUaaggagcUUagggUUUgcagcgUUUUccaaUaccUcccaUgccaaaUgUUUcgagUcaUcccUcccUcUcccUUgcUgccUUUUUgUg	5'	10383	10383	10300	83	8854530	8785639	68891	8852057	8785639	66418	0	y	...(((((((..(..((((..(((((..((....((((((((.(((((.((((((..(((((((((((((((....((((...(((((...)))))..)))).....)))))))))))).))))))))).))))).))))))))....)))))))..))))..)...)))))))...	2	2	2	-86.7	62	20	100	171	3
589	pda-3p-340060_16	AAAUACUCAUUUGGGCAAGAUG	+	3479	3590	0	22	112	-50.5	16	1	2	12	1	gp4a	22	16	824	824	0	gp4a	PDK_30s680231	+	3479	3590	gggaaggcUUcUUgcUcaaaUgagUaUUccaUUgagaaagaUgaUgcUccgUgcUcUcccagagUacUgcgggcUUUaaaaUgAAAUACUCAUUUGGGCAAGAUGUcUUgca	3'	16	16	16	0	13184	13184	0	13184	13184	0	0	y	...(((((.(((((((((((((((((((.((((...((((....(((...((((((.....)))))).)))..))))..)))).))))))))))))))))))).)))))...	2	0	0	-50.5	41	20	100	106	5
83	pda-5p-12958_1929	CGCGCAUGGCGUGGAACGAUCACC	+	12525	12617	0	24	93	-64.7	2289	50	31	1504	704	gp4a	24	1929	897	897	0	gp4a	PDK_30s838941	+	12525	12617	gggagggaggggUggcaUgagaCGCGCAUGGCGUGGAACGAUCACCgUUCGGUCGUGCCACGCUGUGUGCGUCUgaUgcgaUcUcUcUcUaga	5'	2370	2289	2268	21	2067832	2048407	19425	2067055	2048407	18648	0	y	...((((((((((.((((.(((((((((..((((((.((((((.......)))))).))))))..))))))))).)))).))))))))))...	4	0	0	-64.7	35	18	87	87	7
R16	pda-3p-171233_45-R16	UUCGGUCGUGCCACGCUGUGUGCGUC	+	12525	12617	0	R	93	-64.7	40.5	9.5	1.5	13	16.5	gp4a	R	45	966	966	0	gp4a	PDK_30s838941	+	12525	12617	gggagggaggggUggcaUgagaCGCGCAUGGCGUGGAACGAUCACCgUUCGGUCGUGCCACGCUGUGUGCGUCUgaUgcgaUcUcUcUcUaga	3'	2370	40.5	34.5	6	39891	33639	6252	39699	33639	6060	0	y	...((((((((((.((((.(((((((((..((((((.((((((.......)))))).))))))..))))))))).)))).))))))))))...	4	0	0	-64.7	35	18	87	87	7
R6	pda-5p-124075_75-R6	UUAGAGCAUCGUCCAGGAUUUUCC	-	2958	3104	0	R	147	-92	37.5	16.5	0	21	0	gp4a	R	75	894	894	0	gp4a	PDK_30s731021	-	2958	3104	gggcaaaaUUAGAGCAUCGUCCAGGAUUUUCCUagUUcgUUagcUUcccUUUUaggacUUUaaUaUaaUgUcaUUaaaUUUaacUUUaagUccUagaagggaaggUaUagaacUaggaaaaUccUggacgaUgcUcUaaUUUUggca	5'	75	37.5	37.5	0	33525	33525	0	33525	33525	0	0	y	...(((((((((((((((((((((((((((((((((((..((.(((((((((((((((((......(((........))).......))))))))))))))))).))..)))))))))))))))))))))))))))))))))))...	0	0	0	-92	54	24	100	141	27
438	pda-5p-16728_1419	GUUCCCUCCAUUCACUUCAGC	+	19686	19809	0	21	124	-63	1436	38	3	1393	2	gp4a	21	1419	780	780	0	gp4a	PDK_30s1026031	+	19686	19809	ggggUUgggUgUccccUagaGUUCCCUCCAUUCACUUCAGCagggUagccUggcgaagccUUgggaaacagUUcUcgacUccUcgcUgaagUgUUUgggggaacUcUgggUgUcgaccaacaaa	5'	1436	1436	1436	0	1120862	1120862	0	1120862	1120862	0	0	y	...(((((..(...((((((((((((.(((..(((((((((..((.((...(((...)))..(((((....)))))..))))..)))))))))..)))))))))))))))...)..)))))...	4	1	1	-63	34	18	100	118	30
502	pda-5p-260633_23	UUUUGGACCCAGACCCGACCCGGUUGA	+	1618	1791	0	27	174	-87.5	23	13	8	0	2	gp4a	27	23	997	997	0	gp4a	PDK_30s818701	+	1618	1791	ggUcgagUcggaUcagaUccUaggUgaccUcgaUccaacUcggUUUUUUgUUcggaUccUaaUUUUGGACCCAGACCCGACCCGGUUGAagaUcggaUUgggUcgggUcgggUccgagUUgggUUcggaUUgggUccgggUcUgaaUUgggUcgggUUcggaUUcgaaUUgggU	5'	23	23	23	0	22931	22931	0	22931	22931	0	0	y	..((((((((((((.(((((.....((((..((((((............((((((((((....(((((((((.((((((((((..((........))..)))))))))))))))))))..))))))))))))))))..))))......))))).)))))).)))))).......	4	1	1	-87.5	58	21	92	165	8
237	pda-3p-149076_56	GCUCUCUUCUCUUUCUGUCAACC	+	208229	208339	0	23	111	-53.7	56	4	0	52	0	gp4a	23	56	855	855	0	gp4a	PDK_30s839411	+	208229	208339	ggUgggUUgggggcUgacagaagagagUgagcacacagcgaggcaaUUgcaUcagggaaUgccgUUcccgUUgcgUGCUCUCUUCUCUUUCUGUCAACCcUccgUcUcUUU	3'	56	56	56	0	47880	47880	0	47880	47880	0	0	y	...(((..(((((.(((((((((((((.((((((.(((((.((.((..((((......))))..))))))))).)))))).).)))).)))))))).))).))..)))...	2	1	2	-53.7	40	19	100	105	6
R7	pda-3p-89170_129-R7	AAGUAGUUUGUGGGAGAGUUGGUA	-	32273	32408	0	R	136	-94.5	64.5	7	0	57.5	0	gp4a	R	129	888	888	0	gp4a	PDK_30s1210051	-	32273	32408	gUaagcUaUcUgaUcgaUaccaacUcUcccacaaacUacUUcaUgccacUaUUcUaggUUUUccUccaaUgUcaUaaaaccUagaaUagUggcaUgAAGUAGUUUGUGGGAGAGUUGGUAUUgaccagaagUUaag	3'	129	64.5	64.5	0	57276	57276	0	57276	57276	0	0	y	...((((.((((.(((((((((((((((((((((((((((((((((((((((((((((((((.............))))))))))))))))))))))))))))))))))))))))))))))))).))))))))...	0	0	0	-94.5	57	24	100	130	13
640	pda-3p-296980_19	ACACUUUAGAAAGCAUCGUCGAAAG	-	20963	21066	0	25	104	-57.3	19	13	1	4	1	gp4a	25	19	924	924	0	gp4a	PDK_30s762041	-	20963	21066	gUaggcUaagacgaUgcUUUcUaaagUgUcgUcggaggUaccacagUcaUcUaUcUgcccacgaaagUgUgacgACACUUUAGAAAGCAUCGUCGAAAGccacU	3'	19	19	19	0	17556	17556	0	17556	17556	0	0	y	((.((((..((((((((((((((((((((((((..........(((........)))..(((....))).))))))))))))))))))))))))...)))))).	5	1	1	-57.3	30	22	100	103	37
R19	pda-3p-246312_25-R19	UAUUUGUACCUCAUCAAUAUU	-	11902	12046	0	R	145	-60.8	20.5	0.5	0	19.5	0.5	gp4a	R	25	779	779	0	gp4a	PDK_30s890621	-	11902	12046	gUcUUUggUUUccgaUccUcaagaccggUUagaaUgUUgaUggggUacaaaUaUagaaacUgcUUaUagaaggcaaUgagcagUUUacaUUAUUUGUACCUCAUCAAUAUUUUaUUgUcUUUggaUgaUccUUgaUgccaaaUgU	3'	41	20.5	20.5	0	15321.5	15321.5	0	15321.5	15321.5	0	0	y	...(((((..((.((((.(((((((....((((((((((((((((((((((((...(((((((((((........)))))))))))....))))))))))))))))))))))))..)))))..)).))))...))..)))))...	0	0	0	-60.8	53	21	100	139	8
897	pda-5p-448267_11	AGAUCUUAGGUCGGCACAGUAGA	-	15419	15652	0	23	234	-118.6	11	0	0	10	1	gp4a	23	11	862	862	0	gp4a	PDK_30s869491	-	15419	15652	gUgUgaUUgaaUUUUUUUaaaUUaaaUUUUUUUUcUUaaUUaUUUUUcUUccagcaUcacUUUUcUaUUUUUcUUgUUUggUgUUUgUUUUAGAUCUUAGGUCGGCACAGUAGAUcUacUcUgUgUagaUUgaccgUgccaaccUcagaUUUagaacaaacaccaaacaagaaaaacagagaagagaUgUUggaagaaaaaUaaUUagaagagagaaaaaaaUaUUUaaUUaaa	5'	11	11	11	0	9482	9482	0	9482	9482	0	0	y	...(((((((((((((((........(((((((((.((((((((((((((((((((((.(((((((.((((((((((((((((((((((((((((((.((((.(((((.((..((((((.....))))))..)).))))).)))).)))))))))))))))))))))))))))))).))))))).))))))))))))))))))))))))))))))))))))).)))))))))..	4	0	0	-118.6	100	18	100	229	5
400	pda-3p-423087_12	AAUGCCAUUGAUAGCCGUAGGGGG	+	9652	9851	0	24	200	-130.7	12	2	0	10	0	gp4a	24	12	898	898	0	gp4a	PDK_30s665421	+	9652	9851	gUUagUagaggcacaacUUUaUUccUUaagccgaggcUgaccaaUgcagggcaUccUccaggcUaUcaacagcagagcaaagccccgUacUaagcgacaggUgggcaggaggggcUUcgcAAUGCCAUUGAUAGCCGUAGGGGGUgcccUgUggUggUcagccUcggcUUaagaaaaaaagUUgcaccUcUacUaacagc	3'	12	12	12	0	10776	10776	0	10776	10776	0	0	y	(((((((((((..(((((((.((.(((((((((((((((((((..(((((((((((((..(((((((((..(((..((.(((((((...((..((.........))))..))))))).))..)))..)))))))))...)))))))))))))..))))))))))))))))))).)).)))))))..)))))))))))...	5	1	1	-130.7	77	17	100	197	9
494	pda-3p-93572_119	CCUGUGCAUGCCUCCUCCACC	-	15401	15569	0	21	169	-75.4	137.5	0	5	127.5	5	gp4a	21	119	787	787	0	gp4a	PDK_30s799661	-	15401	15569	nagagagagagagaUUgggaUgUagcagUagcagUGGAAGGGACAUGCAGAGGAAaggccaagaaagagaggaggcaaaaaUggUUcUcaUcUcaaUgcUUcUUcUcaaggcagaUUCCUGUGCAUGCCUCCUCCACCccUgcUgcUaccaUUccccUccccUUcUgaa	3'	293	137.5	119	18.5	107472	93653	13819.5	106806	93653	13153.5	0	y	...((((...(((...(((((((((((((((..(((((.(((.((((((.(((((..(((......(((((((((((.....(((....)))....)))))))))))..)))...))))).)))))).))).)))))..)))))))))).))))).)))...))))...	2	0	0	-75.4	58	18	100	163	4
542	pda-5p-85498_137	UGGAAGGGACAUGCAGAGGAA	-	15401	15569	0	21	169	-75.4	137	0	56	64	17	gp4a	21	137	782	782	0	gp4a	PDK_30s799661	-	15401	15569	nagagagagagagaUUgggaUgUagcagUagcagUGGAAGGGACAUGCAGAGGAAaggccaagaaagagaggaggcaaaaaUggUUcUcaUcUcaaUgcUUcUUcUcaaggcagaUUCCUGUGCAUGCCUCCUCCACCccUgcUgcUaccaUUccccUccccUUcUgaa	5'	293	137	137	0	107134	107134	0	107134	107134	0	0	y	...((((...(((...(((((((((((((((..(((((.(((.((((((.(((((..(((......(((((((((((.....(((....)))....)))))))))))..)))...))))).)))))).))).)))))..)))))))))).))))).)))...))))...	2	0	0	-75.4	58	18	100	163	4
97	pda-3p-105149_99	AAGUGAAGUCGGCAACUGAUGUGC	+	138155	138301	1	24	147	-70.6	129	15	2	112	0	gp4a	24	99	891	851	1	gp4a	PDK_30s655081	+	138155	138301	nnnaaaaaaUUUaggaUUUUUaagUaaagUcggcaaaccggUUgccgacUUcUcUUaaaaaUUUUcaaaUUaaaaaaUgUggagaUUUUUAAGUGAAGUCGGCAACUAAUGUGCUgacUUcacUUaaaaaUUUcUaaaUUUUUUUcc	3'	129	129	0	129	110979	0	110979	105849	0	105849	0	y	...((((((((((((((((((((((.(((((((((....(((((((((((((.((((((((((((((.(((....))).)))))))))))))).)))))))))))))....))))))))).))))))))))).)))))))))))...	8	0	0	-70.6	61	19	100	141	4
R1	pda-5p-283724_20-R1	UCUGGAGACCCAUAGCCCAUG	+	214	295	0	R	82	-71	10	0	0	9.5	0.5	gp4a	R	20	778	778	0	gp4a	PDK_30s692211	+	214	295	nnnaUCUGGAGACCCAUAGCCCAUGcaUcaagUgaUcaaUUUUUUgaUcacUUgaUgcaUgggcUaUgggUcUccagaUcaa	5'	20	10	10	0	7780	7780	0	7780	7780	0	0	y	...((((((((((((((((((((((((((((((((((((....))))))))))))))))))))))))))))))))))))...	0	0	0	-71	36	21	100	76	4
645	pda-5p-283724_20	UCUGGAGACCCAUAGCCCAUG	+	173	254	0	21	82	-71	10	0	0	9.5	0.5	gp4a	21	20	778	778	0	gp4a	PDK_30s1167971	+	173	254	nnnaUCUGGAGACCCAUAGCCCAUGcaUcaagUgaUcaaUUUUUUgaUcacUUgaUgcaUgggcUaUgggUcUccagaUcag	5'	20	10	10	0	7780	7780	0	7780	7780	0	0	y	...((((((((((((((((((((((((((((((((((((....))))))))))))))))))))))))))))))))))))...	0	0	0	-71	36	21	100	76	4
741	pda-5p-424271_12	ACAUGUCCACCACGUUGUCCUCCA	-	20038	20155	0	24	118	-89.2	12	3	0	9	0	gp4a	24	12	892	892	0	gp4a	PDK_30s758601	-	20038	20155	nnnccgccaccaccacgUcaACAUGUCCACCACGUUGUCCUCCAUaUcUcUUagacagaggUggUggaagaUUUUggaggccagcgUggUggacaUgUUgacgUggUggUggcggUgg	5'	12	12	12	0	10704	10704	0	10704	10704	0	0	y	...((((((((((((((((((((((((((((((((((.(((((((((((((.....)))))))...........)))))).))))))))))))))))))))))))))))))))))...	2	0	0	-89.2	47	23	100	112	5
543	pda-5p-382296_13	GAGAGUCGCGCUGAUACACCGCC	-	43413	43556	0	23	144	-58.5	13	1	2	9	1	gp4a	23	13	850	850	0	gp4a	PDK_30s674341	-	43413	43556	UaaaagaagagaaagggaaagagaGAGAGUCGCGCUGAUACACCGCCgaaUcUcUcaacagaacaaaagcaUccUccgcUcUgUUUUgcgUgaUUUgUacggUaUaUcaccgccUcUcUcUcUccccUUcUcUcUUgUcUUgaa	5'	13	13	13	0	11050	11050	0	11050	11050	0	0	y	...((((((((((((((...(((((((((..(((.(((((.((((.((((((......(((((((..(((.......))).)))))))...))))))..)))).))))).)))..)))))))))))))).)))))..))))...	4	1	1	-58.5	51	18	100	138	7
666	pda-3p-398260_13	CCAGCGCUGCAUUCGAUAAU	-	1512	1648	0	20	137	-54.6	23	0	1	22	0	gp4a	20	13	743	743	0	gp4a	PDK_30s816511	-	1512	1648	UaaaUcaaaagcaUcaUcgagUgcagcgUUgaUgaacUccUagUaccUUUUUUcgcUagccgUaUcaaaagcUcUgUcUccUgUgcagcgagUgUgaggaUUUcgCCAGCGCUGCAUUCGAUAAUgUcUUUgaUaUa	3'	23	23	23	0	16249	16249	0	16249	16249	0	0	y	...((((((..(((.((((((((((((((((..(((.((((..(((......(((((.((((...((.......)).....)).))))))))))..)))).)))..)))))))))))))))).)))..))))))...	2	0	0	-54.6	46	18	100	131	7
467	pda-3p-228238_28	ACGCUUAAAAGCGUCGGCAUA	+	349	477	0	21	129	-61.8	14	2	1	11	0	gp4a	21	28	767	767	0	gp4a	PDK_30s693271	+	349	477	UaagccgacgcUUUUaagcgUcggccUagUUcaagagaaaccacccgUUUUaagcgUcggUccaagUUcgccaacgcUacUaagcgUcggUUaccUcgUaaacgaacgACGCUUAAAAGCGUCGGCAUA	3'	28	14	14	0	10738	10738	0	10738	10738	0	0	y	...((((((((((((((((((((.....(((...(((.((((...(((((..(((((.(((........))).)))))...)))))..))))..)))...)))...))))))))))))))))))))...	0	0	0	-61.8	43	18	85	123	8
427	pda-5p-403658_12	AUGCUUUUAAGCGUCGUCUGGCCC	-	5194	5333	0	24	140	-71.7	12	5	0	5	2	gp4a	24	12	909	909	0	gp4a	PDK_30s679471	-	5194	5333	UaagggUagUUggggggUggUUaggcgUcUgacgAUGCUUUUAAGCGUCGUCUGGCCCaagUgagccUcgagggUggUUaggUgUccgacgacgcUUUUaagcgUcgUaggcUccUUUcUUUcacUgccccaaacccaag	5'	12	12	12	0	10908	10908	0	10908	10908	0	0	y	...((((..(((((((((((..(((.((((.(((((((((..((((((((((.(((((......(((.....))).....)).))).))))))))))..))))))))))))).))).....))))).))))))))))...	4	1	1	-71.7	49	21	100	134	5
865	pda-3p-265953_23	AAGCUCUGGAUGGAACGCAAGAUAUGUG	-	1791	1877	0	28	87	-50.5	23	13	3	3	4	gp4a	28	23	1052	1052	0	gp4a	M01000016478	-	1791	1877	UaaggUUccUgccUUUcacaUaUcUUgcgUUccagccagaUgaAAGCUCUGGAUGGAACGCAAGAUAUGUGaaaUccggcgaccaca	3'	23	23	23	0	24196	24196	0	24196	24196	0	0	y	...(((..(((..(((((((((((((((((((((.(((((.......))))).)))))))))))))))))))))..)))..)))...	2	0	0	-50.5	32	23	85	81	7
200	pda-5p-420745_12	AGGAUUGUCGAGUCGACUCGA	-	1009	1125	1	21	117	-48.4	12	0	0	10	2	gp4a	21	12	792	756	1	gp4a	PDK_30s809831	-	1009	1125	UacUgaUccUUUgagUcgacccgAGGAUUUUCGAGUCGACUCGAacUUaUcaggaaUcaacccUUgaaagUgacgagUcgacUccUgaUcacgggaUUgaUUgaaaUggUggcaaga	5'	12	12	0	12	9504	0	9504	9072	0	9072	0	y	...((..(((((.((((((((((..((((...(((((((((((.((((.(((((........)))))))))..)))))))))))..)))).)))).)))))).))).))...))...	5	1	1	-48.4	41	15	100	111	8
416	pda-3p-269912_22	ACUACUCUGCUGCGCUCAAUGAUC	+	9962	10132	0	24	171	-67.7	33	8	0	25	0	gp4a	24	22	928	928	0	gp4a	PDK_30s677511	+	9962	10132	UagcgcagUUCAUUGGGCCUAGUAGACUAGUCCaUUagUUUUgccUgUcUagagUUUgUccaUcaaUcaaUcUUcUgaUaUgaUUUggcUUccUaggcUUgUacagcUcaaaacUaaUggACUACUCUGCUGCGCUCAAUGAUCUgcacUaaUggaccaaUgaUcUcagcc	3'	51	33	33	0	30184	30184	0	30184	30184	0	0	y	(((.((((.(((((((((..((((((.((((((((((((((((.((((...(((..((.(((..((((((((....))).)))))))).....))..)))..))))..)))))))))))))))).))))))..))))))))).)))).)))....................	4	0	0	-67.7	58	21	100	151	4
203	pda-5p-310639_18	UCAUUGGGCCUAGUAGACUAGUCC	+	9962	10132	0	24	171	-67.7	18	3	2	13	0	gp4a	24	18	884	884	0	gp4a	PDK_30s677511	+	9962	10132	UagcgcagUUCAUUGGGCCUAGUAGACUAGUCCaUUagUUUUgccUgUcUagagUUUgUccaUcaaUcaaUcUUcUgaUaUgaUUUggcUUccUaggcUUgUacagcUcaaaacUaaUggACUACUCUGCUGCGCUCAAUGAUCUgcacUaaUggaccaaUgaUcUcagcc	5'	51	18	18	0	15912	15912	0	15912	15912	0	0	y	(((.((((.(((((((((..((((((.((((((((((((((((.((((...(((..((.(((..((((((((....))).)))))))).....))..)))..))))..)))))))))))))))).))))))..))))))))).)))).)))....................	4	0	0	-67.7	58	21	100	151	4
286	pda-5p-441054_11	AAAAAGGUACGGCAAGAAAGAACC	+	4212	4402	0	24	191	-133.7	11	5	0	6	0	gp4a	24	11	889	889	0	gp4a	PDK_30s837901	+	4212	4402	UaUaagcUccagcaacagaUcaagcagaacUUaUacaUcagUUacUggUUaaUaccUUAAAAAGGUACGGCAAGAAAGAACCaUUUUaaggUaUUaaccagcaacUgaaggUUcUUUcUUgccgUaccUUUUUaaggUUUUaaccagUaacUgaUgUaUaagUUcUgcUUgUUcUgaUgcUggagcUUUUa	5'	11	11	11	0	9779	9779	0	9779	9779	0	0	y	...(((((((((((.((((.((((((((((((((((((((((((((((((((.(((((((((((((((((((((((((((((.(((....((........))....)))))))))))))))))))))))))))))))).)))))))))))))))))))))))))))))))).)))).)))))))))))...	0	0	0	-133.7	81	24	100	185	8
819	pda-3p-88602_130	AGGAAGAAGAACUUGAACUCAAGU	-	1525	1694	0	24	170	-117.3	130	14	0	114	2	gp4a	24	130	905	905	0	gp4a	PDK_30s1182151	-	1525	1694	UaUaUggggUagUUcUcacaaggacUUgagUUcgagUUcUUcUUcUcaUggaUUUUUgUgUcaccUUUUUcaUgacaUaaaaaagaggaaaagcaUgaaaagggUgacacaaaaacccaUAGGAAGAAGAACUUGAACUCAAGUccUUgUgagaacUaccccacaUacaa	3'	130	130	130	0	117650	117650	0	117650	117650	0	0	y	(((.(((((((((((((((((((((((((((((((((((((((((..((((.((((((((((((((((((((((...................)))))))))))))))))))))).))))..))))))))))))))))))))))))))))))))))))))))).)))...	0	0	0	-117.3	70	22	100	167	19
R	pda-3p-165824_47-R18	CUCCCAAGCCUCAUUUCAUGG	-	9173	9337	1	R	165	-80.9	23.5	3	2	18	0.5	gp4a	R	47	781	745	1	gp4a	PDK_30s842071	-	9173	9337	UaUgagaUcacaagaUaUUcggccAUGAAAUGAGGCUUGGGAGAgggaaccUcgccggaUcagcgacgggggcaaUggaaggagaagaUgaUgccaccUcUcccacgggcaagaacccaUCUCCCAAACCUCAUUUCAUGGUcgaaUaUcccgUgagaUUgUggc	3'	57	23.5	0	23.5	18353.5	0	18353.5	17507.5	0	17507.5	0	y	((..(..((((..((((((((((((((((((((((.(((((((((((..(((((.((......)).)))))((..((...(((((.(.((....)).))))))..)).)).....))).)))))))).))))))))))))))))))))))..))))..)..))..	2	0	0	-80.9	40	19	100	163	68
638	pda-5p-231728_28	AGCAGUGCUCUUUUCAACAAGCGA	+	60600	60721	1	24	122	-90.6	14	2.5	0	11.5	0	gp4a	24	28	892	853	1	gp4a	PDK_30s770891	+	60600	60721	UaUgagccgccagggaUgaaaUggUUagAGCAGUGCUCUUUUCAGCAAGCGAaggcaUUUccaUaUUccUUcgcUUgUUgaaaagagcacUgcUUUaaccaUUUcaccccUgaUggcUcUaU	5'	28	14	0	14	12488	0	12488	11942	0	11942	0	y	...(((((..(((((.(((((((((((((((((((((((((((((((((((((((.((......)).))))))))))))))))))))))))))))))))))))))).)))))..)))))...	0	0	0	-90.6	51	24	100	116	6
568	pda-5p-152404_54	ACCGGCGGUAAGAUUUUGUAGG	-	5274	5518	0	22	245	-100.8	182	34	2	134	12	gp4a	22	54	796	796	0	gp4a	PDK_30s1147931	-	5274	5518	UaUUgagcagUgaaUgUUUgaaUggaUUUcUgcaaaaUccUacccccagUUgaaUUUcUUggUgcUaacUUUUaaUcUcUagggcUaagaaaUUcaACCGGCGGUAAGAUUUUGUAGGaaUCUAUUCAAACAUUGACUGCUcgaUaUUcgaUgUUaUcUcUagaUUgUcUgcaUUaccUaaaacUUgUacagaUgaagagUUgcaUUcUcaUaUUUUaaUcUagUaUUaUgacaUaUaaUcUgcU	5'	1011	182	182	0	154315	154315	0	154315	154315	0	0	y	(((((((((((.(((((((((((((((((((((((((((.((((.((.((((((((((((((..(((............)))..)))))))))))))).)).)))).))))))))))))))))))))))))))).)))))))))))....(((((((..((((((((..((((............))))...((((.((((...))))))))....))))))))....)))))))..........	2	0	0	-100.8	61	19	100	146	12
805	pda-3p-64863_213	UCUAUUCAAACAUUGACUGCU	-	5274	5518	0	21	245	-100.8	829	113	29	652	35	gp4a	21	213	782	782	0	gp4a	PDK_30s1147931	-	5274	5518	UaUUgagcagUgaaUgUUUgaaUggaUUUcUgcaaaaUccUacccccagUUgaaUUUcUUggUgcUaacUUUUaaUcUcUagggcUaagaaaUUcaACCGGCGGUAAGAUUUUGUAGGaaUCUAUUCAAACAUUGACUGCUcgaUaUUcgaUgUUaUcUcUagaUUgUcUgcaUUaccUaaaacUUgUacagaUgaagagUUgcaUUcUcaUaUUUUaaUcUagUaUUaUgacaUaUaaUcUgcU	3'	1011	829	748	81	661538	594659	66879	658370	594659	63711	0	y	(((((((((((.(((((((((((((((((((((((((((.((((.((.((((((((((((((..(((............)))..)))))))))))))).)).)))).))))))))))))))))))))))))))).)))))))))))....(((((((..((((((((..((((............))))...((((.((((...))))))))....))))))))....)))))))..........	2	0	0	-100.8	61	19	100	146	12
140	pda-5p-190444_38	AUUUGCUAGUGUUGUGGUACUUGG	+	81	205	0	24	125	-40.6	19	3.5	1	14.5	0	gp4a	24	38	896	896	0	gp4a	PDK_30s1004021	+	81	205	UaUUUaUagacUgUggUUaaaUaAUUUGCUAGUGUUGUGGUACUUGGaaggaacUaUgUcaUUUUgUUgaUaUggacccgccUUgaaUcacaUUagUaagUUgUUUaaUUaUggUaUUaUgaUga	5'	38	19	19	0	17024	17024	0	17024	17024	0	0	y	...((((((((..(..((((((((((((((((...((((((....((..((..((((((((......))))))))..)).))....))))))))))))))))))))))..)..)).))))))...	8	3	1	-40.6	43	17	100	119	6
594	pda-5p-350550_15	UCAUGACAAUGCAAUGUUCGGAA	-	461	670	1	23	210	-131.8	40	10	7	14	9	gp4a	23	15	842	803	1	gp4a	PDK_30s1100001	-	461	670	UcacgcaUUUUaagaUaUaUgagUUcaUgccagaaaaUccUUccggaUggUcUccagUUgaaagcaUUCAUGACAAUGCAGUGUUCGGAAcaUUUaUaCCACACUUGAACUUCAUUGUUUUUcaagUaUggUacaaaUgUUccgaaUacUgcaUUaUcaUaaaUgcUUUcgacaUgagaccaUccggaagggUUUUccggcaUgaacUca	5'	53	40	0	40	33627	0	33627	32070	0	32070	0	y	...................((((((((((((.((((((((((((((((((((((..((((((((((((.((((.(((((((((((((((((((((.(((((.((((((((......))...)))))).))))).))))))))))))))))))))).)))).))))))))))))..)))))))))))))))))))))).))))))))))))	2	0	0	-131.8	84	21	100	191	6
231	pda-5p-255507_24	CACCGUUGGAUCAUCCACAGG	+	33009	33185	0	21	177	-90.7	24	0	0	24	0	gp4a	21	24	792	792	0	gp4a	PDK_30s682841	+	33009	33185	UcacgcgaaagaaggaUUUaUaUUccUUcgagcgaaUcCACCGUUGGAUCAUCCACAGGUcacUUUgagagaUgUgcagcggacgagUgacggaUUUgcgaagUgcUUUgagagcUgUUcggUggaUgaUccaacggUcgaUUUacgcgaaggaaggggaaUccUUcUUUcgUgcgg	5'	24	24	24	0	19008	19008	0	19008	19008	0	0	y	.(.((((((((((((((((...((((((((...(((((.(((((((((((((((((.(..((((((.((((...(((((....((.....))...))))).....)))).)))).))..).))))))))))))))))).)))))...))))))))...)))))))))))))))).).	2	0	0	-90.7	65	18	100	175	5
591	pda-3p-373581_14	AGGACGGGUAUCCGAUCACUGGACU	-	1483	1562	0	25	80	-44.7	14	4	0	10	0	gp4a	25	14	930	930	0	gp4a	M01000010665	-	1483	1562	UcagaUcaccUcgcUUcggUgaUgUUggaaacccgUccUcaAGGACGGGUAUCCGAUCACUGGACUggacggUgaUcUaa	3'	14	14	14	0	13020	13020	0	13020	13020	0	0	y	..((((((((((..((((((((..(((((.((((((((....)))))))).)))))))))))))...)).))))))))..	2	2	1	-44.7	31	21	96	76	4
476	pda-3p-386334_13	AGCCUAUGUGGACUAAAGGACACU	-	26588	26731	1	24	144	-55	13	4	1	7	1	gp4a	24	13	902	862	1	gp4a	PDK_30s6550952	-	26588	26731	UccccUagUccaUaUagaUUaUggaccgggUccacUUUgaUaUcaUUUgUaacaacacaagaccUcaUccaaaaUggcUagcUgaaacgUaUUaaggaUaUcaaagcgaacUcggcUcaUAGCCUAUGUGGACUAAGGGACACU	3'	13	13	0	13	11726	0	11726	11206	0	11206	0	y	((((.((((((((((((..((((..((((((...((((((((((.(((((......))))).......((.....))...................))))))))))...))))))..))))..)))))))))))).))))....	4	0	0	-55	36	17	83	140	52
58	pda-5p-28659_707	GUUCCCUCAGACACUUCACU	+	208314	208403	0	20	90	-56.6	840	32	12	791	5	gp4a	20	707	737	737	0	gp4a	PDK_30s6550926	+	208314	208403	UccccUggaGUUCCCUCAGACACUUCACUagggcUUgcccacUgUUggggagccaaUcUcUgcUgaagUgUUUgggggaacUccgggUgU	5'	840	840	840	0	623099	623099	0	623099	623099	0	0	y	...((((((((((((((((((((((((..(((((((.((((....))))))))).....))..))))))))))))))))))))))))...	0	0	0	-56.6	35	18	100	84	4
695	pda-5p-28278_721	AACAAAAUACGGUCUGGCCGCGGC	+	15246	15400	0	24	155	-81.4	780	440	4	321	15	gp4a	24	721	890	890	0	gp4a	PDK_30s663441	+	15246	15400	UccgcUgcccUUgUUUcgAACAAAAUACGGUCUGGCCGCGGCcUUaaaaaaUUUUgUaUUUUUUaagUaaagUUggcaaaUcUcUUcacUUgaaaaUUgcaaaUUUUUcUaaggccgcggcUggacccUaUUUcgUUcaaaacaaggUcagcaac	5'	780	780	769	11	688564	678554	10010	688124	678554	9570	0	y	...((((.((((((((.((((.(((((.((((..((((((((((((.((((.((((((.(((((((((.(((...........))).))))))))).)))))).)))).))))))))))))..)))).))))).)))).)))))))).))))...	4	0	0	-81.4	59	20	100	149	11
530	pda-3p-413562_12	AAUGGACAUGGAUACGAAUCGGAUGUUA	-	4225	4391	0	28	167	-48	12	2	0	9	1	gp4a	28	12	1052	1052	0	gp4a	PDK_30s665285	-	4225	4391	UcgaaUaUggaUUggaUaUUgaUaUaUUcaUaUUUgUUUccaUagUUUUcaacgaaUaUggaUacaUgUacaaaUacagaUaUUaaacggaUaUcaaaaUUagUaUUcaUaUUUgUUcUaAAUGGACAUGGAUACGAAUCGGAUGUUAagcaUaUccaUaUUUgUUg	3'	12	12	12	0	12624	12624	0	12624	12624	0	0	y	.(((((((((((......(((((((((((.((((..(.(((((...((..(((((((((((((((..(((....))).((((((.....)))))).......)))))))))))))))..))))))).)..)))).))))...)))))))....)))))))))))...	4	3	2	-48	49	21	100	163	37
788	pda-5p-426126_11	UUUUGGACCCAGACCCAACCCGAUUGA	+	98082	98232	0	27	151	-90.1	11	8	1	2	0	gp4a	27	11	1034	1034	0	gp4a	PDK_30s700961	+	98082	98232	UcgggUccUaaUUUUGGACCCAGACCCAACCCGAUUGAagaUcgggUccgggUccgaaUagggUcgggUccgaaUcgggUcgagUcUgggUccgaaccgggUcaggUUcgggUccgaaUcgggUcaggUUUgggUccgaaUcgggUccacU	5'	11	11	11	0	11374	11374	0	11374	11374	0	0	y	..((..((....((((((((((((((..((((((((...((((.(((.(((..((((......))))..))).))).))))......((..(((((((......)))))))..)).))))))))..))))))))))))))..))..))...	4	0	0	-90.1	26	22	92	146	80
391	pda-5p-228808_28	AGGAUGUUUGACAUGGUCCUUGCC	+	35053	35220	0	24	168	-96.5	28	10	0	15	3	gp4a	24	28	907	907	0	gp4a	PDK_30s1179991	+	35053	35220	UgacccUUUcgagggggccccUUcAGGAUGUUUGACAUGGUCCUUGCCUcUgUagaagUccUcUaUagagaaUcgUUUccUaUgUgUUccUUUcaaUagaagcaaaUcacaUccUUaggccUggcaaggaccgUgccaaacaUccUgaaggggccccaUcaaaagggc	5'	28	28	28	0	25396	25396	0	25396	25396	0	0	y	...((((((.((.(((((((((((((((((((((.(((((((((((((((((((((.....)))))))).........((((((((((..((((....))))..)).))))....))))...))))))))))))).))))))))))))))))))))).)).)))))).	2	0	0	-96.5	42	23	100	164	74
876	pda-5p-184243_40	AGUGAGGUUAUUGUAGUUUGACUA	-	19559	19702	0	24	144	-59.1	59	12	8	35	4	gp4a	24	40	887	887	0	gp4a	PDK_30s834811	-	19559	19702	UgaccUgcggUgcUUcggcUacUcacAGUGAGGUUAUUGUAGUUUGACUAcacgUaUacaUggUcUcUagUcaUaUgggUccaUgcagUgUagaUUggcUgcagUaagUUcacUgUaggagUagggUaUgcaccUacaaggaaU	5'	59	59	59	0	52770	52770	0	52770	52770	0	0	y	...(((..(((((.....(((((((((((((..(((((((((.(..(((((((.....(((((.(((.........))).)))))..)))))).)..))))))))))..)))))))..)))))).....)))))....)))...	4	1	2	-59.1	46	19	100	138	9
66	pda-3p-98773_109	CGGCGAGUCUGUCCUUGGCUACC	+	11818	11907	0	23	90	-49	140	6	67	41	26	gp4a	23	109	866	866	0	gp4a	PDK_30s724681	+	11818	11907	UgcagccaaggaUgacUUgccggcaUUagccUUaagaagaggagacUcUaccUcacUccUaagUUgcCGGCGAGUCUGUCCUUGGCUACC	3'	140	140	140	0	119566	119566	0	119566	119566	0	0	y	...((((((((((((((((((((((((((.....((.((((....))))..)).....))))..)))))))))))).))))))))))...	1	1	1	-49	32	19	86	84	4
253	pda-5p-5696_4736	CAAGGGAAGUCGGCAAAACG	-	26613	26779	1	20	167	-89.6	18989	852	5085.5	4283.5	8768	gp4a	20	4736	741	709	1	gp4a	PDK_30s933841	-	26613	26779	UgcggcUgcggaaaaaaaUUUggagaUUUUUAAGGGAAGUCGGCAAAACGUUUgccaacUUUacUUaaaaaUUccaaaaUUaaaaaaaUUaaaaaaUUUUUaagUgaagUUggcaagUgaUUUgccgaUUUcaUUUaaaaaUcUUUaaaUUUUUUUccgcggccUcc	5'	19154	18989	4990	13999	12848908	3222620	9626288	12338282	3222620	9115662	0	y	...((((((((((((((((((..((((((((((..((((((((((((.(..((((((((((((((((((((((....((((.....))))....))))))))))))))))))))))..).))))))))))))..))))))))))..))))))))))))))))))...	4	0	0	-89.6	67	16	100	161	5
R2	pda-5p-85614_137-R2	AGCUCCCUUGCCAGCUUUAGCCCG	-	2408	2652	0	R	245	-217.9	496	112.5	4	352	27.5	gp4a	R	137	895	895	0	gp4a	PDK_30s769101	-	2408	2652	UggaggUaccUcUgUaUUgacggcUcccUUgcUUcgaaaUccUccaaaaUcUggcUcacgaccagUUgggagUcgcUgaagaccUUcaagUUcccgaccUUcAGCUCCCUUGCCAGCUUUAGCCCGgcgaUaagUgccUcgaacaaUgUaUgAGGCACUUAUCGCCGGGCUAAAGCUggcaagggagcUgaaggUcgggaacUUgaaggUcUUcagcgacUcccaacUggUcgUgagccagaUUU	5'	976	496	316	180	422360	263264	159095	416010	263264	152746	0	y	.(((((.......((.((((.(((......))))))).))))))).(((((((((((((((((((((((((((((((((((((((((((((((((((((((((((((((((((((((((((((((((((((((((((((((.........)))))))))))))))))))))))))))))))))))))))))))))))))))))))))))))))))))))))))))))))))))))))))))))))	0	0	0	-217.9	95	24	100	199	9
R3	pda-3p-117840_82-R3	AGGCACUUAUCGCCGGGCUAAAGC	-	2408	2652	0	R	245	-217.9	109	17	0	86	6	gp4a	R	82	897	897	0	gp4a	PDK_30s769101	-	2408	2652	UggaggUaccUcUgUaUUgacggcUcccUUgcUUcgaaaUccUccaaaaUcUggcUcacgaccagUUgggagUcgcUgaagaccUUcaagUUcccgaccUUcAGCUCCCUUGCCAGCUUUAGCCCGgcgaUaagUgccUcgaacaaUgUaUgAGGCACUUAUCGCCGGGCUAAAGCUggcaagggagcUgaaggUcgggaacUUgaaggUcUUcagcgacUcccaacUggUcgUgagccagaUUU	3'	976	109	109	0	96330	96330	0	96330	96330	0	0	y	.(((((.......((.((((.(((......))))))).))))))).(((((((((((((((((((((((((((((((((((((((((((((((((((((((((((((((((((((((((((((((((((((((((((((((.........)))))))))))))))))))))))))))))))))))))))))))))))))))))))))))))))))))))))))))))))))))))))))))))))	0	0	0	-217.9	95	24	100	199	9
463	pda-5p-414524_12	AUGAAGUGAUUAAUGGGAUUGCA	+	590	695	0	23	106	-41.5	23	5	0	13	5	gp4a	23	12	861	861	0	gp4a	PDK_30s1208031	+	590	695	UggcAUGAAGUGAUUAAUGGGAUUGCAUUagccUagaaUcaUUcUUcUgcccaaaggcgaUggUgUUUcgaaagcUgaUgUgaUUUUgUUaaUUagcUUcaUgaUa	5'	23	23	23	0	20342	20342	0	20342	20342	0	0	y	...(((((((((((((((..(((..(((((((...(((.(((...((.(((....)))))..))).)))....)))))))..)))..)))))))).)))))))...	4	1	1	-41.5	36	19	100	100	4
655	pda-3p-171233_45	UUCGGUCGUGCCACGCUGUGUGCGUC	+	3769	3845	0	26	77	-52.7	53.5	11.5	4.5	14	23.5	gp4a	26	45	966	966	0	gp4a	PDK_30s1208551	+	3769	3845	UgUcaUgagacgcgcacggcgUggaacggUcaacgUUgaggagUUCGGUCGUGCCACGCUGUGUGCGUCUcaUgggc	3'	94	53.5	53.5	0	54451	54451	0	54451	54451	0	0	y	..((((((((((((((((((((((.(((..((((........))).)..))).))))))))))))))))))))))..	4	1	1	-52.7	29	22	100	73	8
714	pda-3p-280606_21	UCAUGCGAUUCCUUUGGA	+	36344	36457	0	18	114	-50.3	52	5	0	47	0	gp4a	18	21	660	660	0	gp4a	PDK_30s884951	+	36344	36457	UgUgagcagcUgaUggagaacUccaaagggaUcgcaUUgaUcUcUcUcUcUcUcUcUcUcgaUagUgUUgUUagaUCAUGCGAUUCCUUUGGAaUUUUccgccUgUUgcUUcUU	3'	52	52	21	31	36173	13860	22313	35024	13860	21164	0	y	...(((((((...(((((((.((((((((((((((((.(((((......((.((......)).)).......))))))))))))))))))))).)))))))...)))))))...	1	1	1	-50.3	35	18	100	108	29
351	pda-3p-285375_20	AUUAGGACUCUAUUUGAAUC	-	141459	141583	0	20	125	-47.9	42	0	0	40	2	gp4a	20	20	747	747	0	gp4a	PDK_30s6550957	-	141459	141583	UUaaUUaggacUUUacgaaUccUaaUccUaUUaggacUUaUUUaaUUUUagUccUaaUccaAUUAGGACUCUAUUUGAAUCcgaagUccUaaUccaaUUaggaUUUcUaggaaagUccUagUcca	3'	42	42	42	0	31000	31000	0	31000	31000	0	0	y	...(((((((((((..((((((((((...((((((((((((((((....(((((((((...)))))))))....))))))...))))))))))...)))))))))).....)))))))))))...	8	0	0	-47.9	46	15	100	119	3
2	pda-3p-123856_76	AACGGAGAGGCUAUUGGUAGUACC	+	12542	12701	0	24	160	-48.8	101	15	5	72	9	gp4a	24	76	893	893	0	gp4a	PDK_30s788981	+	12542	12701	UUaUgggUgagaUcUgaUUgUaUUggggaUaUUUaUagUcUUgaUgUaUUgUgagUcUUUcUUUgUaagagaaaagagUUcUcUUgaUUcUaUUUUgUUcaaaUUagagaUaacacAACGGAGAGGCUAUUGGUAGUACCcagUgcUaUUUaacccaacU	3'	101	101	101	0	89743	89743	0	89743	89743	0	0	y	...(((((.......(((.((((((((..(((..((((((((..(((..((((.((((((.((((.((.((((.((((((.....)))))).)))).))))))..))))))..)))))))..))))))))..)))...)))))))).)))..)))))...	5	2	2	-48.8	56	17	100	154	5
548	pda-3p-302733_19	AACUCGCUCCGAACGCAUGGAGGA	-	120	201	1	24	82	-44.4	19	1	1	14	3	gp4a	24	19	890	852	1	gp4a	PDK_30s1104431	-	120	201	UUcccUccaUgggUUUgUgaacgagcUgcUcgggaagUaccaacUUgUcccggcgcAACUCGCUCCAAACGCAUGGAGGAca	3'	19	19	0	19	16910	0	16910	16188	0	16188	0	y	...((((((((.(((((.((.((((.((((((((((((....)))..)))))).))).)))).))))))).))))))))...	2	1	1	-44.4	31	20	95	76	4
104	pda-3p-117918_82	CGGAUGCUGCGCCUCGUGUA	+	627	812	0	20	186	-104.2	284	29	8	242	5	gp4a	20	82	728	728	0	gp4a	PDK_30s832241	+	627	812	UUcggUUUcUccgUUUcUccUgaaUaaUaUaUacaggagacgcagggUUCGUGUUCAGCAAGCUCUGGGACCCaggcgcUgcgagcggcgcagcgUcggccgUagcgcgUggcUcUcaUcgcaUggcUgggcaUaCGGAUGCUGCGCCUCGUGUAUaUUaUUacUUaggagaUaggaggaaccUUU	3'	695	284	284	0	227411	227411	0	227411	227411	0	0	y	...(((((((((...((((((((.(((((((((((.(((.(((((..((((((..((((..((..(((((.(((.((((((((..(((((...)))))..)))))))).))).)))))..))...))))..)..)))))..))))).))).)))))).))))).))))))))..)))))))))...	5	2	2	-104.2	69	17	100	180	3
268	pda-5p-92754_121	CGUGUUCAGCAAGCUCUGGGACCC	+	627	812	0	24	186	-104.2	411	111	35	220	45	gp4a	24	121	904	904	0	gp4a	PDK_30s832241	+	627	812	UUcggUUUcUccgUUUcUccUgaaUaaUaUaUacaggagacgcagggUUCGUGUUCAGCAAGCUCUGGGACCCaggcgcUgcgagcggcgcagcgUcggccgUagcgcgUggcUcUcaUcgcaUggcUgggcaUaCGGAUGCUGCGCCUCGUGUAUaUUaUUacUUaggagaUaggaggaaccUUU	5'	695	411	364	47	379265	334960	44305	377484	334960	42524	0	y	...(((((((((...((((((((.(((((((((((.(((.(((((..((((((..((((..((..(((((.(((.((((((((..(((((...)))))..)))))))).))).)))))..))...))))..)..)))))..))))).))).)))))).))))).))))))))..)))))))))...	5	2	2	-104.2	69	17	100	180	3
739	pda-3p-200031_35	CCCGACUUGCAUCAACUGAGU	+	1556	1699	0	21	144	-77.5	35	4	1	18	12	gp4a	21	35	776	776	0	gp4a	PDK_30s842691	+	1556	1699	UUcUcgcUgcUUUcUcgagcUcgcUUggUgcaggUcgggacccgUcUUgggaccgUccgaUcUcUgggagaccgaUcaggcacgUccgUUcgaUaggccggUUCCCGACUUGCAUCAACUGAGUUcgagaacccUcggcgaaag	3'	35	35	35	0	27160	27160	0	27160	27160	0	0	y	...((((((..(((((((((((..((((((((((((((((.(((.((((((((.(((.((((...((....)))))).)))..))))......)))).))).))))))))))))))))..)))))))))))....))))))...	4	0	0	-77.5	53	19	100	138	4
734	pda-5p-276361_21	UCUGUCGCAGGAGAGAUGAUGC	+	4080	4170	0	22	91	-59.9	21	1	1	17	2	gp4a	22	21	804	804	0	gp4a	PDK_30s1122511	+	4080	4170	UUUgggaUccUCUGUCGCAGGAGAGAUGAUGCUUgcUaUggUUUgUaUcaccaggagcaagUcUcaUcUcUccUcgacagaggaacccUcU	5'	21	21	21	0	16884	16884	0	16884	16884	0	0	y	...(((.((((((((((.(((((((((((..((((((.((((.......))))..))))))..))))))))))))))))))))).)))...	4	1	1	-59.9	34	19	100	85	7
321	pda-5p-427445_11	UUUGGACCCAGACCCGACCCGGUUG	+	37033	37089	0	25	57	-41.6	11	1	4	1	5	gp4a	25	11	913	913	0	gp4a	PDK_30s1038271	+	37033	37089	UUUUGGACCCAGACCCGACCCGGUUGaaaaacggaUcgggUcgggUcgggUccaUac	5'	11	11	11	0	10043	10043	0	10043	10043	0	0	y	...(((((((.((((((((((((((........)))))))))))))))))))))...	1	1	1	-41.6	21	21	88	51	8
[truncated: 5 more columns]
