# Supplementary material for: A genome-wide identification of the miRNAome in response to salinity stress in date palm (Phoenix dactylifera L.)
Source: Front Plant Sci. 2015 Nov 5;6:946. doi: 10.3389/fpls.2015.00946 (PMC4633500; doi:10.3389/fpls.2015.00946)
Supplement: Supplementary file 5 [file Table5.XLSX]

## Sheet: Sheet1
Table S5. The normalized expression value based on the count numbers of each miRNA sequenced from leaves and roots grown under normal and salinity stress conditions.
Significantly regulated miRNAs were predicted if multiple test corrected P-value and The False discovery rate (FDR) < 0.05. Fold of control (FC) was calculated by dividing the normalized count number of the treatment by the normalized count number of the control treatment. Upregulated and downregulated miRNA are coloured with red and green, respectively.
Leaves						Roots
miRNA_name	logFC	logCPM	P-Value	FDR		miRNA_name	logFC	logCPM	P-Value	FDR
pda-5p-260633_23	-5.8829	6.13113	0.000517265	0.00437212		pda-miR528-5p_R-1_1ss9GA	-2.92759	6.90242	0.000872039	0.0171985
pda-5p-239350_26	-5.64668	6.93161	5.44527e-06	7.73228e-05		pda-miR167a_R-2	-2.18306	8.02557	0.000407477	0.0120545
pda-5p-376037_14	-4.04333	6.70164	0.000376589	0.00351814		pda-miR396a-5p_L-1R-1_1ss2CT	-1.6884	11.1817	0.000145893	0.00575466
pda-3p-265953_23	-3.90132	6.22277	0.000517265	0.00437212		pda-miR396b_L-5_1ss13AC	-1.48077	12.1657	0.000574701	0.0139397
pda-3p-258367_24	-3.6858	6.35326	0.00213372	0.0161164		pda-miR171h_L-1R+1_1ss2TC	-1.43151	10.2665	0.00176406	0.029821
pda-5p-426126_11	-3.629	5.51496	0.00724341	0.0451125		pda-miR396_R-1_1ss7AG	-1.41513	12.1646	0.000981094	0.018331
pda-3p-296980_19	-3.58062	6.252	0.00334606	0.023757		pda-5p-5696_4736	1.27043	16.6019	0.00230974	0.0342201
pda-3p-17663_1328	-3.50177	13.8624	2.59292e-14	4.60244e-12		pda-3p-21009_1073	1.59911	9.86635	0.000641572	0.0142349
pda-5p-264380_23	-3.27403	6.85543	0.00108459	0.00855619		pda-3p-17663_1328	1.74704	15.2671	3.61582e-05	0.00183374
pda-5p-55341_272	-3.25213	10.2122	4.90446e-10	2.90181e-08		pda-5p-55341_272	1.7615	9.14394	0.000339839	0.0109675
pda-5p-138615_63	-2.92396	10.4644	4.11078e-09	1.82416e-07		pda-3p-35797_519	2.03592	7.11626	0.00240987	0.0342201
pda-miR1310-p5	-2.84239	14.7675	1.3594e-10	1.20647e-08		pda-3p-94240_118	2.11216	7.67178	0.000513333	0.0139397
pda-3p-35797_519	-2.66161	11.0133	2.09663e-08	6.20253e-07		pda-5p-138615_63	2.1433	9.44871	1.20091e-05	0.000852644
pda-5p-28278_721	-2.63211	11.5902	1.33454e-08	4.73762e-07		pda-miR171	2.22999	7.1203	0.00185899	0.0299974
pda-3p-173080_44	-2.41635	11.5997	1.27728e-07	3.48794e-06		pda-miR393a_R+1_1ss21CT	2.29623	7.59736	0.000332559	0.0109675
pda-3p-107067_96	-2.12615	8.36156	0.000506343	0.00437212		pda-5p-28278_721	2.34689	7.04598	0.00115274	0.0204611
pda-miR1310-p3_1ss20TC	-2.09863	15.994	9.29322e-07	1.78688e-05		pda-5p-264380_23	2.71399	6.36432	0.00237037	0.0342201
pda-5p-37236_491	-1.85245	10.6822	6.85597e-05	0.000695391		pda-3p-171233_45	2.82687	7.63634	1.15422e-05	0.000852644
pda-5p-83202_144	-1.46275	8.99274	0.00687666	0.0443857		pda-5p-152404_54	2.97441	6.59764	0.000589	0.0139397
pda-miR171	1.41878	10.3845	0.00252184	0.0186511		pda-miR529e_1ss21CT	3.08467	9.1168	7.70051e-09	1.36684e-06
pda-miR396_1ss21TG	1.44886	16.5053	0.000546087	0.00450839		pda-5p-85614_137	3.38791	7.56322	1.27052e-06	0.000150344
pda-miR169b-3p_2ss15C-22AC	1.46789	9.61492	0.00383797	0.0262015		pda-5p-274880_21	3.74949	6.37213	7.35111e-05	0.00326206
pda-miR529e_1ss21CT	1.5289	12.4461	0.000401945	0.00365873		pda-3p-200031_35	3.87383	6.49335	3.36527e-05	0.00183374
pda-miR394a-5p_1ss8TG	1.57473	10.5938	0.000793861	0.00640501		pda-5p-12958_1929	4.98281	12.4997	7.82698e-23	2.77858e-20
pda-miR167-3p_2ss10GT20CT	1.72236	9.24422	0.00162094	0.0125095		pda-3p-258367_24	5.76975	5.337	0.00085757	0.0171985
pda-miR396	1.77864	13.9383	3.18404e-05	0.00035323
pda-miR319_L+1R+1	1.89922	8.09781	0.00360547	0.0250969
pda-miR396b_L-5_1ss13AC	1.90296	15.104	7.92322e-06	0.000104176
pda-miR167a_R-2	2.03705	13.0041	2.99679e-06	5.06599e-05
pda-miR168c-3p	2.06444	7.78026	0.00591186	0.038865
pda-3p-8373_3137	2.0842	12.4784	2.29238e-06	4.06897e-05
pda-miR395_R-1_1ss14AG	2.18603	12.4611	8.23628e-07	1.71993e-05
pda-miR530_2ss18TC20TA	2.2585	9.57642	2.24462e-05	0.000257046
pda-miR482-p3_1ss9TA	2.27607	9.83662	1.3203e-05	0.000167396
pda-miR160a-5p	2.29826	10.2474	3.38534e-06	5.4627e-05
pda-miR169b_R-4	2.40223	8.91231	5.20713e-05	0.000543686
pda-5p-28659_707	2.43837	10.3208	9.56358e-07	1.78688e-05
pda-miR169_1ss20TG	2.65953	11.3661	1.83784e-08	5.93122e-07
pda-5p-12958_1929	2.72428	11.1982	1.08316e-08	4.27244e-07
pda-miR169p_L-1R-1_1ss2GC	2.79619	9.56031	3.98373e-07	9.42816e-06
pda-miR168a-3p_R-1_1ss3TC	2.80471	8.40935	4.24015e-05	0.000456137
pda-miR169b_R-2_1ss1TC	2.88289	8.92568	3.85484e-06	5.94987e-05
pda-5p-16728_1419	3.00767	11.0557	8.76693e-10	4.44609e-08
pda-miR169_R-1_1ss1CT	3.83632	7.77207	1.70381e-05	0.00020857
pda-miR397_1ss20CT	4.1456	6.45246	0.00334606	0.023757
pda-miR1432-5p_L-1_1ss20AG	4.61579	7.65734	7.62631e-06	0.000104128
pda-3p-91106_124	4.98362	8.00757	4.76602e-07	1.05746e-05
pda-5p-396570_13	5.18507	5.75852	0.00724341	0.0451125
pda-miR827_2ss15AG21TG	5.20638	7.47544	5.24925e-06	7.73228e-05
pda-3p-285375_20	5.33323	5.90791	0.00417417	0.0279591
pda-miR398c	5.37079	11.0715	3.93658e-19	1.39749e-16
pda-miR528-5p	5.97326	8.95511	1.7052e-11	2.01782e-09
pda-5p-85498_137	5.99779	6.57145	0.000193974	0.0018611
pda-miR397_2ss5TC20CT	6.10473	6.67736	0.000120499	0.00118826
pda-miR394a-5p_1ss19CT	6.35046	6.91994	1.95811e-05	0.000231709
pda-3p-93572_119	6.98096	7.53828	2.40483e-07	6.09797e-06
pda-5p-61161_232	7.75005	8.2874	2.24222e-10	1.59197e-08
