# Supplementary material for: A genome-wide identification of the miRNAome in response to salinity stress in date palm (Phoenix dactylifera L.)
Source: Front Plant Sci. 2015 Nov 5;6:946. doi: 10.3389/fpls.2015.00946 (PMC4633500; doi:10.3389/fpls.2015.00946)
Supplement: Supplementary file 6 [file Table6.XLSX]

## Sheet: Sheet1
Table S6. Potential target for miRNA sequenced from P. dactylifera leaves (A) and roots (B).
Table S6 (A)
miRNA_Acc.	Target_Acc.	Expectation	UPE	miRNA_start	miRNA_end	Target_start	Target_end	miRNA_aligned_fragment	Target_aligned_fragment	Inhibition	Target_Desc.	multiplicity
pda-miR827-3p_R-1	PDK_30s703271g003	2	19.773	1	20	401	420	UUAGAUGACCAUCAGCAAAC	GUUUGCUGCUGGUUAUCUAG	Cleavage	[locus_tag="PDK_30s703271L003"] [product="partial gene, no protein identified"] [strand="-"]	1
pda-miR827-3p_R-1	PDK_30s973161g001	2.5	16.601	1	20	1458	1477	UUAGAUGACCAUCAGCAAAC	GUCUGCUGAUGAUCAUCUGA	Translation	[locus_tag="PDK_30s973161L001"] [product="histone acetyltransferase"] [strand="+"]	1
pda-miR827-3p_R-1	PDK_30s804361g004	3	11.225	1	20	526	545	UUAGAUGACCAUCAGCAAAC	GUUUGCUGAUGGCCAAUUAA	Cleavage	[locus_tag="PDK_30s804361L004"] [product="retinoblastoma protein"] [strand="-"]	1
pda-miR827-3p_R-1	PDK_30s1191581g001	2.5	17.154	1	20	1626	1645	UUAGAUGACCAUCAGCAAAC	GUCUGCUGAUGAUCAUCUGA	Translation	[locus_tag="PDK_30s1191581L001"] [product="histone acetyltransferase"] [strand="+"]	1
pda-miR827-3p_R-1	PDK_30s760631g001	3	16.906	1	20	1478	1497	UUAGAUGACCAUCAGCAAAC	GUUAGCAGAUGGUCAUUUGA	Cleavage	[locus_tag="PDK_30s760631L001"] [product="receptor protein"] [strand="-"]	1
pda-miR529e	PDK_30s756061g001	1.5	16.372	1	20	670	689	AGAAGAGAGAGAGUACAGCC	AGCUGUGCUCUCUCUCUUCU	Cleavage	[locus_tag="PDK_30s756061L001"] [product="partial gene, no protein identified"] [strand="+"]	1
pda-miR529e	PDK_30s704101g001	2.5	17.648	1	20	213	232	AGAAGAGAGAGAGUACAGCC	AGCUGUGCUCUCUCUCUUCG	Cleavage	[locus_tag="PDK_30s704101L001"] [product="partial gene, no protein identified"] [strand="-"]	1
pda-miR529e	PDK_30s772931g003	2	13.697	1	20	442	461	AGAAGAGAGAGAGUACAGCC	GAUUGUGCUCUCUCUCUUCU	Cleavage	[locus_tag="PDK_30s772931L003"] [product="partial gene, no protein identified"] [strand="+"]	1
pda-miR529e	PDK_30s774191g002	2.5	20.457	1	20	1242	1261	AGAAGAGAGAGAGUACAGCC	GGUUGAACUCUCUCUCUUCA	Cleavage	[locus_tag="PDK_30s774191L002"] [product="abscisic acid responsive elements-bindingfactor"] [strand="-"]	1
pda-miR529e	PDK_30s1025931g001	3	21.478	1	20	588	607	AGAAGAGAGAGAGUACAGCC	GGCCGUGCUCUUCCUCUUCU	Cleavage	[locus_tag="PDK_30s1025931L001"] [product="partial gene, no protein identified"] [strand="+"]	1
pda-miR529e	PDK_30s905141g003	3	17.681	1	20	1918	1937	AGAAGAGAGAGAGUACAGCC	GGCUGAACUCGCUUUCUUUU	Translation	[locus_tag="PDK_30s905141L003"] [product="partial gene, no protein identified"] [strand="-"]	1
pda-miR156i-p3	PDK_30s799651g002	3	19.042	1	21	114	133	CUCUCUAUGCUUCUGCCAUCA	UGAUGGC-GAAGUAUGGAGAG	Cleavage	[locus_tag="PDK_30s799651L002"] [product="auxin amidohydrolase"] [strand="-"]	1
pda-miR156i-p3	PDK_30s969931g002	3	23.524	1	20	2854	2873	CUCUCUAUGCUUCUGCCAUC	GGUGGCAGCAACAUGGAGAG	Translation	[locus_tag="PDK_30s969931L002"] [product="partial gene, no protein identified"] [strand="-"]	1
pda-miR156c-p3	PDK_30s680571g004	2.5	17.671	1	20	1	20	GCUCUCUAUGCUUCUGUCAU	AUGGCAGAAGCAAAGGGAGU	Cleavage	[locus_tag="PDK_30s680571L004"] [product="partial gene, no protein identified"] [strand="+"]	1
pda-miR156c-p3	PDK_30s1169121g004	2.5	9.512	1	20	979	998	GCUCUCUAUGCUUCUGUCAU	AUGACAGAAGAACGGAGAGC	Translation	[locus_tag="PDK_30s1169121L004"] [product="high mobility group family"] [strand="+"]	1
pda-miR156c-p3	PDK_30s687201g002	3	17.25	1	21	1933	1953	GCUCUCUAUGCUUCUGUCAUU	GAUGAUAUAGUCAUAGAGAGC	Translation	[locus_tag="PDK_30s687201L002"] [product="partial gene, no protein identified"] [strand="+"]	1
pda-miR396e-3p_R-1_3ss13CT18GA20AG	PDK_30s1195041g001	2	24.224	1	20	205	224	GGUCAAGAAAGCUGUGGAAG	UUUCCACAGCUUUCUUGAAC	Cleavage	[locus_tag="PDK_30s1195041L001"] [product="partial gene, no protein identified"] [strand="-"]	1
pda-miR396e-3p_R-1_3ss13CT18GA20AG	PDK_30s1017891g001	1.5	12.683	1	20	1080	1099	GGUCAAGAAAGCUGUGGAAG	CUUCCAUUGCUUUCUUGACC	Cleavage	[locus_tag="PDK_30s1017891L001"] [product="atp binding"] [strand="-"]	1
pda-miR396e-3p_R-1_3ss13CT18GA20AG	PDK_30s820371g001	2	16.731	1	20	1726	1745	GGUCAAGAAAGCUGUGGAAG	CUCCCACAGCUUUCUUGGCU	Cleavage	[locus_tag="PDK_30s820371L001"] [product="phospholipase d alpha 2"] [strand="-"]	1
pda-miR396e-3p_R-1_3ss13CT18GA20AG	PDK_30s868111g005	3	17.45	1	20	2867	2886	GGUCAAGAAAGCUGUGGAAG	UUUCUGCAGCUUUCUUGGCA	Cleavage	[locus_tag="PDK_30s868111L005"] [product="similar to predicted protein"] [strand="-"]	1
pda-miR396e-3p_R-1_3ss13CT18GA20AG	PDK_30s1018511g001	2.5	10.549	1	20	27	46	GGUCAAGAAAGCUGUGGAAG	UUUCCACAGUAUUCUUGAUC	Translation	[locus_tag="PDK_30s1018511L001"] [product="cinnamoyl-CoA reductase"] [strand="-"]	1
pda-miR396e-3p_R-1_3ss13CT18GA20AG	PDK_30s1018511g002	2.5	10.549	1	20	27	46	GGUCAAGAAAGCUGUGGAAG	UUUCCACAGUAUUCUUGAUC	Translation	[locus_tag="PDK_30s1018511L002"] [product="cinnamoyl-CoA reductase"] [strand="-"]	1
pda-miR396e-3p_R-1_3ss13CT18GA20AG	PDK_30s1161861g002	2.5	16.892	1	20	786	805	GGUCAAGAAAGCUGUGGAAG	CCUCCAUGGCUUUCUUGACU	Cleavage	[locus_tag="PDK_30s1161861L002"] [product="xylose isomerase"] [strand="-"]	1
pda-miR396e-3p_R-1_3ss13CT18GA20AG	PDK_30s973851g002	3	11.11	1	20	1218	1237	GGUCAAGAAAGCUGUGGAAG	UUUCUGCACCUUUCUUGAUC	Cleavage	[locus_tag="PDK_30s973851L002"] [product="plasma membrane h+ atpase"] [strand="-"]	1
pda-miR396e-3p_R-1_3ss13CT18GA20AG	PDK_30s921311g004	3	18.118	1	20	161	180	GGUCAAGAAAGCUGUGGAAG	GUUCCACAAGUUUCUUGACC	Translation	[locus_tag="PDK_30s921311L004"] [product="vacuolar protein sorting 55 containing protein"] [strand="+"]	1
pda-miR396e-3p_R-1_3ss13CT18GA20AG	PDK_30s847701g002	3	13.458	1	20	786	805	GGUCAAGAAAGCUGUGGAAG	CAUCCUCAGCUUUCUUGACA	Cleavage	[locus_tag="PDK_30s847701L002"] [product="condensin complex components subunit"] [strand="-"]	1
pda-miR396e-3p_R-1_3ss13CT18GA20AG	PDK_30s730341g007	3	7.394	1	20	1629	1648	GGUCAAGAAAGCUGUGGAAG	CUUGCACAACUUUCUUGACA	Cleavage	[locus_tag="PDK_30s730341L007"] [product="similar to predicted protein"] [strand="-"]	1
pda-miR396e-3p_R-1_3ss13CT18GA20AG	PDK_30s710451g003	3	11.801	1	20	1115	1134	GGUCAAGAAAGCUGUGGAAG	CUUCCACUGCUUGCUUGGCU	Cleavage	[locus_tag="PDK_30s710451L003"] [product="e3 ubiquitin protein ligase"] [strand="-"]	1
pda-miR172b-5p_L-1R+2_1ss3AG	PDK_30s692321g001	2	21.771	1	20	4378	4397	UGGCAUCAUCAAGAUUCACA	UCUGAAUCUUGUUGAUGCCA	Translation	[locus_tag="PDK_30s692321L001"] [product="partial gene, no protein identified"] [strand="-"]	1
pda-miR172b-5p_L-1R+2_1ss3AG	PDK_30s864611g004	3	21.79	1	21	452	472	UGGCAUCAUCAAGAUUCACAU	GUUUGAAUCUUGAUGGUGGCA	Cleavage	[locus_tag="PDK_30s864611L004"] [product="dna binding"] [strand="+"]	1
pda-miR172b-5p_L-1R+2_1ss3AG	PDK_30s1082091g001	3	19.628	1	20	2145	2164	UGGCAUCAUCAAGAUUCACA	UCUGAAUCUUGGUGAUGUUG	Cleavage	[locus_tag="PDK_30s1082091L001"] [product="similar to predicted protein"] [strand="-"]	1
pda-miR172b-5p_L-1R+2_1ss3AG	PDK_30s764761g002	3	18.723	1	21	524	544	UGGCAUCAUCAAGAUUCACAU	GUGUGAUAUUUGAUGAUGCUA	Cleavage	[locus_tag="PDK_30s764761L002"] [product="partial gene, no protein identified"] [strand="+"]	1
pda-miR172b-5p_L-1R+2_1ss3AG	PDK_30s873681g003	3	21.016	1	20	633	652	UGGCAUCAUCAAGAUUCACA	UGUGAAUGUUGUUGAUGUUA	Translation	[locus_tag="PDK_30s873681L003"] [product="nucleic acid binding protein"] [strand="+"]	1
pda-miR172b-5p_L-1R+2_1ss3AG	PDK_30s987941g001	3	20.741	1	20	91	110	UGGCAUCAUCAAGAUUCACA	UGAGAAUCCUGAUGAUGCUG	Cleavage	[locus_tag="PDK_30s987941L001"] [product="floral homeotic protein"] [strand="-"]	1
pda-miR393b-3p_R-1_2ss5A-21GT	PDK_30s671321g002	2.5	14.012	1	20	206	225	AUCAUGCGAUCCUUUUGGAU	AUCCAAAGGGAUCGCAUUGU	Cleavage	[locus_tag="PDK_30s671321L002"] [product="transport inhibitor response 1"] [strand="-"]	1
pda-miR393b-3p_R-1_2ss5A-21GT	PDK_30s717471g001	2	24.214	1	20	1241	1260	AUCAUGCGAUCCUUUUGGAU	AGCUAAAAGGAUUGCAUGAU	Cleavage	[locus_tag="PDK_30s717471L001"] [product="receptor protein"] [strand="+"]	1
pda-miR393b-3p_R-1_2ss5A-21GT	PDK_30s741321g004	3	11.133	1	20	120	139	AUCAUGCGAUCCUUUUGGAU	GUCCAAAAGAAUUGUAUGGU	Translation	[locus_tag="PDK_30s741321L004"] [product="partial gene, no protein identified"] [strand="-"]	1
pda-miR827_2ss15AG21TG	PDK_30s703271g003	2	19.773	1	21	400	420	UUAGAUGACCAUCAGCAAACG	UGUUUGCUGCUGGUUAUCUAG	Cleavage	[locus_tag="PDK_30s703271L003"] [product="partial gene, no protein identified"] [strand="-"]	1
pda-miR827_2ss15AG21TG	PDK_30s973161g001	2.5	16.601	1	20	1458	1477	UUAGAUGACCAUCAGCAAAC	GUCUGCUGAUGAUCAUCUGA	Translation	[locus_tag="PDK_30s973161L001"] [product="histone acetyltransferase"] [strand="+"]	1
pda-miR827_2ss15AG21TG	PDK_30s804361g004	3	11.225	1	20	526	545	UUAGAUGACCAUCAGCAAAC	GUUUGCUGAUGGCCAAUUAA	Cleavage	[locus_tag="PDK_30s804361L004"] [product="retinoblastoma protein"] [strand="-"]	1
pda-miR827_2ss15AG21TG	PDK_30s1191581g001	2.5	17.154	1	20	1626	1645	UUAGAUGACCAUCAGCAAAC	GUCUGCUGAUGAUCAUCUGA	Translation	[locus_tag="PDK_30s1191581L001"] [product="histone acetyltransferase"] [strand="+"]	1
pda-miR827_2ss15AG21TG	PDK_30s760631g001	3	16.906	1	21	1477	1497	UUAGAUGACCAUCAGCAAACG	UGUUAGCAGAUGGUCAUUUGA	Cleavage	[locus_tag="PDK_30s760631L001"] [product="receptor protein"] [strand="-"]	1
pda-miR397_1ss20CT	PDK_30s1170901g001	1.5	19.094	1	21	108	128	UCAUUGAGUGCAGCGUUGAUG	CGUCAACGCUGCUCUCAAUGA	Translation	[locus_tag="PDK_30s1170901L001"] [product="diphenol oxidase"] [strand="+"]	1
pda-miR397_1ss20CT	PDK_30s6550951g005	1.5	12.637	1	21	396	416	UCAUUGAGUGCAGCGUUGAUG	CGUCAACGCUGCUCUCAAUGA	Translation	[locus_tag="PDK_30s6550951L005"] [product="diphenol oxidase"] [strand="+"]	1
pda-miR397_1ss20CT	PDK_30s661361g002	1.5	12.399	1	20	688	707	UCAUUGAGUGCAGCGUUGAU	AUCAACGCUGCACUCAACGA	Cleavage	[locus_tag="PDK_30s661361L002"] [product="similar to predicted protein"] [strand="+"]	1
pda-miR397_1ss20CT	PDK_30s693681g002	1.5	17.503	1	21	675	695	UCAUUGAGUGCAGCGUUGAUG	UGUCAACGCUGCUCUCAAUGA	Translation	[locus_tag="PDK_30s693681L002"] [product="laccase (diphenol oxidase)-like protein"] [strand="+"]	1
pda-miR397_1ss20CT	PDK_30s903491g006	3	11.447	1	21	710	730	UCAUUGAGUGCAGCGUUGAUG	CAUCACCGCUGCAUUCAAAGA	Cleavage	[locus_tag="PDK_30s903491L006"] [product="protein kinase domain containing expressed"] [strand="+"]	1
pda-miR397_1ss20CT	PDK_30s752661g001	2.5	20.707	1	20	247	266	UCAUUGAGUGCAGCGUUGAU	ACCGGUGCUGCACUCAAUGA	Cleavage	[locus_tag="PDK_30s752661L001"] [product="similar to predicted protein"] [strand="+"]	1
pda-miR397_1ss20CT	PDK_30s749161g002	3	18.816	1	21	765	785	UCAUUGAGUGCAGCGUUGAUG	UAACAAUGCUGCAUUCAAUGC	Cleavage	[locus_tag="PDK_30s749161L002"] [product="pentatricopeptide repeat-containing"] [strand="-"]	1
pda-miR397_1ss20CT	PDK_30s1079711g002	3	15.654	1	21	675	695	UCAUUGAGUGCAGCGUUGAUG	UGUCAACGCUGCCCUCAACGA	Translation	[locus_tag="PDK_30s1079711L002"] [product="laccase (diphenol oxidase)-like protein"] [strand="+"]	1
pda-miR397_1ss20CT	PDK_30s906701g001	3	23.27	1	20	145	164	UCAUUGAGUGCAGCGUUGAU	AUCGGCGAUGUACUCGAUGA	Cleavage	[locus_tag="PDK_30s906701L001"] [product="partial gene, no protein identified"] [strand="+"]	1
pda-miR397_1ss20CT	PDK_30s65509610g003	3	15.194	1	21	993	1013	UCAUUGAGUGCAGCGUUGAUG	UAUUUCUGCUGCACUCAAUGA	Cleavage	[locus_tag="PDK_30s65509610L003"] [product="PREDICTED: hypothetical protein"] [strand="+"]	1
pda-miR156h-p3_1ss11AT	PDK_30s740851g001	3	20.348	1	21	567	587	UUGCGUGCUCUCUUCUCUUUC	GAAGGGGAAGUGGGCACGCAG	Translation	[locus_tag="PDK_30s740851L001"] [product="partial gene, no protein identified"] [strand="+"]	1
pda-miR156h-p3_1ss11AT	PDK_30s991741g001	3	20.882	1	21	472	492	UUGCGUGCUCUCUUCUCUUUC	GGUAGAGAAGAGGCCACGCAA	Cleavage	[locus_tag="PDK_30s991741L001"] [product="similar to predicted protein"] [strand="-"]	1
pda-miR535_1ss12GA	PDK_30s787781g010	3	5.675	1	20	633	652	UGACAACGAGAAAGAGCACG	CGUUCUCUUUCUCGUUCUCG	Cleavage	[locus_tag="PDK_30s787781L010"] [product="partial gene, no protein identified"] [strand="-"]	1
pda-miR535_1ss12GA	PDK_30s1084171g001	3	12.786	1	20	1325	1344	UGACAACGAGAAAGAGCACG	UGUGGUCUUUCUCAUUGUCA	Cleavage	[locus_tag="PDK_30s1084171L001"] [product="similar to predicted protein"] [strand="-"]	1
pda-5p-400528_12-R13	PDK_30s739461g002	3	14.913	1	20	778	797	AAUUAAGUCUUCUCUGCACA	UGUGUAGAGGAGGCUUACUU	Cleavage	[locus_tag="PDK_30s739461L002"] [product="similar to predicted protein"] [strand="+"]	1
pda-3p-246312_25-R19	PDK_30s865341g003	3	15.227	1	20	962	981	UAUUUGUACCUCAUCAAUAU	AUAUUCAUGGGGUACACAUA	Cleavage	[locus_tag="PDK_30s865341L003"] [product="partial gene, no protein identified"] [strand="+"]	1
pda-3p-246312_25-R19	PDK_30s687161g008	3	14.426	1	21	136	156	UAUUUGUACCUCAUCAAUAUU	GAUGAUGAUGAUGUGCAAAUA	Translation	[locus_tag="PDK_30s687161L008"] [product="ubiquitin-protein ligase zinc ion bindingprotein"] [strand="+"]	1
pda-3p-246312_25-R19	PDK_30s1103751g017	3	19.341	1	20	1327	1346	UAUUUGUACCUCAUCAAUAU	AGGUUGAUGAUGUGCAAAUA	Translation	[locus_tag="PDK_30s1103751L017"] [product="swi snf matrix actin dependent regulator ofsubfamily a-like 1"] [strand="-"]	1
pda-miR528-5p	PDK_30s804191g003	2.5	12.781	1	21	792	812	UGGAAGGGGCAUGCAGAGGAG	CUCUUCUGCAUAUCUCUUCCA	Translation	[locus_tag="PDK_30s804191L003"] [product="microtubule associated protein family expressed"] [strand="-"]	1
pda-miR528-5p	PDK_30s1089671g002	3	4.047	1	21	426	446	UGGAAGGGGCAUGCAGAGGAG	UUCUUCUGUAUGCCUUUUCCU	Cleavage	[locus_tag="PDK_30s1089671L002"] [product="similar to predicted protein"] [strand="-"]	1
pda-miR528-5p	PDK_30s1172971g001	3	9.217	1	21	518	538	UGGAAGGGGCAUGCAGAGGAG	CUCUUCUUCAUGCUCCUUCCU	Cleavage	[locus_tag="PDK_30s1172971L001"] [product="retrotransposon unclassified"] [strand="-"]	1
pda-miR528-5p	PDK_30s655081g010	2.5	9.117	1	21	853	873	UGGAAGGGGCAUGCAGAGGAG	UUCUUCUGCCUGCCCCUUCUG	Cleavage	[locus_tag="PDK_30s655081L010"] [product="sucrose phosphate phosphatase"] [strand="-"]	1
pda-miR528-5p	PDK_30s715161g001	2.5	17.884	1	21	321	341	UGGAAGGGGCAUGCAGAGGAG	UUCCUCUGCAUCCCUCUUUCG	Translation	[locus_tag="PDK_30s715161L001"] [product="clathrin assembly"] [strand="+"]	1
pda-miR528-5p	PDK_30s1023721g002	3	12.265	1	21	792	812	UGGAAGGGGCAUGCAGAGGAG	CUCUUUUGCAUUCACCUUCCA	Translation	[locus_tag="PDK_30s1023721L002"] [product="bipolar kinesin krp-"] [strand="-"]	1
pda-miR528-5p	PDK_30s669462g003	2.5	3.555	1	21	57	77	UGGAAGGGGCAUGCAGAGGAG	UUCCUCUGCCCGCCCUUUCCA	Translation	[locus_tag="PDK_30s669462L003"] [product="superoxide dismutase"] [strand="+"]	1
pda-miR528-5p	PDK_30s671741g004	3	23.531	1	20	944	963	UGGAAGGGGCAUGCAGAGGA	UCCUUUGCAUUUUUCUUCCA	Translation	[locus_tag="PDK_30s671741L004"] [product="partial gene, no protein identified"] [strand="+"]	1
pda-miR160a_L+1R-1	PDK_30s718951g001	1	20.156	1	21	1378	1398	CUGCCUGGCUCCCUGUAUGCC	GGCAUACAGGGAGCCAGGCAU	Cleavage	[locus_tag="PDK_30s718951L001"] [product="similar to predicted protein"] [strand="+"]	1
pda-miR160a_L+1R-1	PDK_30s951701g002	1.5	19.012	1	21	799	819	CUGCCUGGCUCCCUGUAUGCC	GGCAUGCAGGGAGCCAGGCAU	Cleavage	[locus_tag="PDK_30s951701L002"] [product="auxin response"] [strand="+"]	1
pda-miR160a_L+1R-1	PDK_30s1124891g002	3	21.748	1	21	277	297	CUGCCUGGCUCCCUGUAUGCC	GGCAUACAAGGAGCUUGGCAG	Cleavage	[locus_tag="PDK_30s1124891L002"] [product="nac domain ipr003441"] [strand="-"]	1
pda-miR171h_L-1R+1	PDK_30s983281g001	3	22.379	1	20	370	389	UGAGCCGAACCAAUAUCACU	UGUGAUUUUGGUUUGGCUCG	Cleavage	[locus_tag="PDK_30s983281L001"] [product="mpk14 - mapk"] [strand="+"]	1
pda-miR166i-5p_R+1_2ss5CA6AG	PDK_30s773361g001	3	16.789	1	20	29	48	AAUGAGGUUUGAUCCAAGAU	AUCUUGUGUCAAACUUCAUG	Cleavage	[locus_tag="PDK_30s773361L001"] [product="partial gene, no protein identified"] [strand="+"]	1
pda-miR166i-5p_R+1_2ss5CA6AG	PDK_30s968351g006	3	12.844	1	20	828	847	AAUGAGGUUUGAUCCAAGAU	CUCUUGGAUUAUACUUCAUU	Translation	[locus_tag="PDK_30s968351L006"] [product="similar to predicted protein"] [strand="-"]	1
pda-miR166i-5p_R+1_2ss5CA6AG	PDK_30s692531g006	3	22.901	1	22	1403	1424	AAUGAGGUUUGAUCCAAGAUCU	AUAUCUUGGAUAAGGCCUUGUU	Translation	[locus_tag="PDK_30s692531L006"] [product="similar to predicted protein"] [strand="+"]	1
pda-miR166i-5p_R+1_2ss5CA6AG	PDK_30s1089341g001	2.5	18.524	1	20	845	864	AAUGAGGUUUGAUCCAAGAU	AUCUUUGACCGAACCUCAUU	Cleavage	[locus_tag="PDK_30s1089341L001"] [product="partial gene, no protein identified"] [strand="-"]	1
pda-miR1432-5p_L-1_1ss20AG	PDK_30s1087351g002	3	20.182	1	19	522	541	UCAGGAGAGAUG-ACACCGG	CCGGUGUUCGUCUCUCUUGA	Cleavage	[locus_tag="PDK_30s1087351L002"] [product="pp315_arath ame: full=pentatricopeptiderepeat-containing protein at4g16470"] [strand="-"]	1
pda-miR172a_R-1_1ss1AG	PDK_30s758731g001	0.5	14.903	1	20	286	305	GGAAUCUUGAUGAUGCUGCA	UGCAGCAUCAUCAAGAUUCU	Cleavage	[locus_tag="PDK_30s758731L001"] [product="partial gene, no protein identified"] [strand="-"]	1
pda-miR172a_R-1_1ss1AG	PDK_30s749921g002	0.5	14.657	1	20	1326	1345	GGAAUCUUGAUGAUGCUGCA	UGCAGCAUCAUCAGGAUUCC	Cleavage	[locus_tag="PDK_30s749921L002"] [product="ap2 domain-containing transcription factor"] [strand="+"]	1
pda-miR172a_R-1_1ss1AG	PDK_30s929391g001	2.5	23.688	1	20	2033	2052	GGAAUCUUGAUGAUGCUGCA	UGUGGCAUCAUCAAGAUGCC	Cleavage	[locus_tag="PDK_30s929391L001"] [product="rolled expressed"] [strand="+"]	1
pda-miR172a_R-1_1ss1AG	PDK_30s862391g001	3	24.497	1	20	85	104	GGAAUCUUGAUGAUGCUGCA	UGCGGUGUCAUCAAGAAUCC	Cleavage	[locus_tag="PDK_30s862391L001"] [product="plasma membrane-type calcium atpase"] [strand="+"]	1
pda-miR172a_R-1_1ss1AG	PDK_30s1067401g004	3	12.853	1	20	1039	1058	GGAAUCUUGAUGAUGCUGCA	UGCAGCACUAUCAAGAUUUG	Cleavage	[locus_tag="PDK_30s1067401L004"] [product="ferredoxin-dependent glutamate synthase"] [strand="-"]	1
pda-miR172a_R-1_1ss1AG	PDK_30s795501g001	2.5	20.598	1	20	3080	3099	GGAAUCUUGAUGAUGCUGCA	UGCAGCAUAAACAAGAUUCU	Translation	[locus_tag="PDK_30s795501L001"] [product="partial gene, no protein identified"] [strand="+"]	1
pda-miR528-5p_R-1_1ss9GA	PDK_30s804191g003	2	12.781	1	20	793	812	UGGAAGGGACAUGCAGAGGA	UCUUCUGCAUAUCUCUUCCA	Translation	[locus_tag="PDK_30s804191L003"] [product="microtubule associated protein family expressed"] [strand="-"]	1
pda-miR528-5p_R-1_1ss9GA	PDK_30s1154711g002	3	9.736	1	20	198	217	UGGAAGGGACAUGCAGAGGA	UCCUCUGCAUGUCACCUCCA	Cleavage	[locus_tag="PDK_30s1154711L002"] [product="hexokinase 1"] [strand="-"]	1
pda-miR528-5p_R-1_1ss9GA	PDK_30s671741g004	2.5	23.531	1	20	944	963	UGGAAGGGACAUGCAGAGGA	UCCUUUGCAUUUUUCUUCCA	Translation	[locus_tag="PDK_30s671741L004"] [product="partial gene, no protein identified"] [strand="+"]	1
pda-miR528-5p_R-1_1ss9GA	PDK_30s1150541g003	3	14.254	1	20	214	233	UGGAAGGGACAUGCAGAGGA	GUCUCUGUAUCUCCCUUCCA	Translation	[locus_tag="PDK_30s1150541L003"] [product="similar to predicted protein"] [strand="-"]	1
pda-miR528-5p_R-1_1ss9GA	PDK_30s706291g001	3	12.29	1	20	780	799	UGGAAGGGACAUGCAGAGGA	UUCUUUGUAAGUUCCUUCCA	Translation	[locus_tag="PDK_30s706291L001"] [product="partial gene, no protein identified"] [strand="-"]	1
pda-miR528-5p_R-1_1ss9GA	PDK_30s877101g002	3	8.622	1	20	379	398	UGGAAGGGACAUGCAGAGGA	UCCUUUCCAUCUUCCUUCCA	Translation	[locus_tag="PDK_30s877101L002"] [product="similar to predicted protein"] [strand="-"]	1
pda-miR528-5p_R-1_1ss9GA	PDK_30s1074181g006	3	5.33	1	20	378	397	UGGAAGGGACAUGCAGAGGA	UCCUCUCCAUUUCUCUUUCA	Translation	[locus_tag="PDK_30s1074181L006"] [product="pax transcription activation domain interacting"] [strand="-"]	1
pda-miR528-5p_R-1_1ss9GA	PDK_30s749061g001	3	12.402	1	20	1646	1665	UGGAAGGGACAUGCAGAGGA	UCCUCUGCUUUUUUCUUCCA	Translation	[locus_tag="PDK_30s749061L001"] [product="leucyl-trna synthetase"] [strand="-"]	1
pda-miR528-5p_R-1_1ss9GA	PDK_30s910541g004	3	10.502	1	20	83	102	UGGAAGGGACAUGCAGAGGA	UUCCCUGCUUGUUCCUUCCA	Cleavage	[locus_tag="PDK_30s910541L004"] [product="kinesin-like calmodulin-binding protein"] [strand="-"]	1
pda-miR159c_R-1_1ss7TG	PDK_30s1165641g012	1	18.954	1	20	963	982	CUUGGAGUGAAGGGAGCUCC	GGAGCUCCCUUCACUCCAAU	Cleavage	[locus_tag="PDK_30s1165641L012"] [product="partial gene, no protein identified"] [strand="+"]	1
pda-miR159c_R-1_1ss7TG	PDK_30s971331g001	3	13.07	1	20	234	253	CUUGGAGUGAAGGGAGCUCC	GAAGCUCUCUUCAUUCCAAA	Cleavage	[locus_tag="PDK_30s971331L001"] [product="partial gene, no protein identified"] [strand="-"]	1
pda-miR159c_R-1_1ss7TG	PDK_30s674821g002	3	12.47	1	20	260	279	CUUGGAGUGAAGGGAGCUCC	GGGGCUUCCUCCACUUUAAG	Translation	[locus_tag="PDK_30s674821L002"] [product="cold acclimation protein"] [strand="-"]	1
pda-miR159c_R-1_1ss7TG	PDK_30s1061801g004	3	19.021	1	20	584	603	CUUGGAGUGAAGGGAGCUCC	GCAGCUUCCUUCACUGCAAG	Cleavage	[locus_tag="PDK_30s1061801L004"] [product="fructose-bisphosphate chloroplast expressed"] [strand="-"]	1
pda-miR159c_R-1_1ss7TG	PDK_30s925071g011	3	19.768	1	20	584	603	CUUGGAGUGAAGGGAGCUCC	GCAGCUUCCUUCACUGCAAG	Cleavage	[locus_tag="PDK_30s925071L011"] [product="fructose-bisphosphate chloroplast expressed"] [strand="-"]	1
pda-miR159c_R-1_1ss7TG	PDK_30s1141531g006	2.5	21.258	1	19	588	607	CUUGGAGUGAAGG-GAGCUC	GAGCUUUCCUUCACUCCAAG	Cleavage	[locus_tag="PDK_30s1141531L006"] [product="myb family transcription factor-related protein"] [strand="+"]	1
pda-miR159c_R-1_1ss7TG	PDK_30s806121g001	2.5	18.352	1	19	591	610	CUUGGAGUGAAGGG-AGCUC	GAGCUAUCCUUCACUCCAAG	Cleavage	[locus_tag="PDK_30s806121L001"] [product="myb family transcription factor-related protein"] [strand="+"]	1
pda-miR396g-3p_R-1_1ss2TG	PDK_30s1195041g001	2	24.224	1	20	205	224	GGUCAAGAAAGCUGUGGAAG	UUUCCACAGCUUUCUUGAAC	Cleavage	[locus_tag="PDK_30s1195041L001"] [product="partial gene, no protein identified"] [strand="-"]	1
pda-miR396g-3p_R-1_1ss2TG	PDK_30s1017891g001	1.5	12.683	1	20	1080	1099	GGUCAAGAAAGCUGUGGAAG	CUUCCAUUGCUUUCUUGACC	Cleavage	[locus_tag="PDK_30s1017891L001"] [product="atp binding"] [strand="-"]	1
pda-miR396g-3p_R-1_1ss2TG	PDK_30s820371g001	2	16.731	1	20	1726	1745	GGUCAAGAAAGCUGUGGAAG	CUCCCACAGCUUUCUUGGCU	Cleavage	[locus_tag="PDK_30s820371L001"] [product="phospholipase d alpha 2"] [strand="-"]	1
pda-miR396g-3p_R-1_1ss2TG	PDK_30s868111g005	3	17.45	1	20	2867	2886	GGUCAAGAAAGCUGUGGAAG	UUUCUGCAGCUUUCUUGGCA	Cleavage	[locus_tag="PDK_30s868111L005"] [product="similar to predicted protein"] [strand="-"]	1
pda-miR396g-3p_R-1_1ss2TG	PDK_30s1018511g001	2.5	10.549	1	20	27	46	GGUCAAGAAAGCUGUGGAAG	UUUCCACAGUAUUCUUGAUC	Translation	[locus_tag="PDK_30s1018511L001"] [product="cinnamoyl-CoA reductase"] [strand="-"]	1
pda-miR396g-3p_R-1_1ss2TG	PDK_30s1018511g002	2.5	10.549	1	20	27	46	GGUCAAGAAAGCUGUGGAAG	UUUCCACAGUAUUCUUGAUC	Translation	[locus_tag="PDK_30s1018511L002"] [product="cinnamoyl-CoA reductase"] [strand="-"]	1
pda-miR396g-3p_R-1_1ss2TG	PDK_30s1161861g002	2.5	16.892	1	20	786	805	GGUCAAGAAAGCUGUGGAAG	CCUCCAUGGCUUUCUUGACU	Cleavage	[locus_tag="PDK_30s1161861L002"] [product="xylose isomerase"] [strand="-"]	1
pda-miR396g-3p_R-1_1ss2TG	PDK_30s973851g002	3	11.11	1	20	1218	1237	GGUCAAGAAAGCUGUGGAAG	UUUCUGCACCUUUCUUGAUC	Cleavage	[locus_tag="PDK_30s973851L002"] [product="plasma membrane h+ atpase"] [strand="-"]	1
pda-miR396g-3p_R-1_1ss2TG	PDK_30s921311g004	3	18.118	1	20	161	180	GGUCAAGAAAGCUGUGGAAG	GUUCCACAAGUUUCUUGACC	Translation	[locus_tag="PDK_30s921311L004"] [product="vacuolar protein sorting 55 containing protein"] [strand="+"]	1
pda-miR396g-3p_R-1_1ss2TG	PDK_30s847701g002	3	13.458	1	20	786	805	GGUCAAGAAAGCUGUGGAAG	CAUCCUCAGCUUUCUUGACA	Cleavage	[locus_tag="PDK_30s847701L002"] [product="condensin complex components subunit"] [strand="-"]	1
pda-miR396g-3p_R-1_1ss2TG	PDK_30s730341g007	3	7.394	1	20	1629	1648	GGUCAAGAAAGCUGUGGAAG	CUUGCACAACUUUCUUGACA	Cleavage	[locus_tag="PDK_30s730341L007"] [product="similar to predicted protein"] [strand="-"]	1
pda-miR396g-3p_R-1_1ss2TG	PDK_30s710451g003	3	11.801	1	20	1115	1134	GGUCAAGAAAGCUGUGGAAG	CUUCCACUGCUUGCUUGGCU	Cleavage	[locus_tag="PDK_30s710451L003"] [product="e3 ubiquitin protein ligase"] [strand="-"]	1
pda-miR164-p3	PDK_30s914801g002	3	22.203	1	20	1222	1241	UUGCACGUGCCCUGCUUCUC	GAGAAGCAGGGCGUGGGCGA	Cleavage	[locus_tag="PDK_30s914801L002"] [product="similar to predicted protein"] [strand="-"]	1
pda-miR394a-3p_R+1_3ss11AC19TC20GT	PDK_30s826121g002	3	21.492	1	21	476	496	AGGUGGGCAUCCUGCCAACUG	UGGUUGGGAGGCUGUCCACCU	Translation	[locus_tag="PDK_30s826121L002"] [product="dna binding"] [strand="-"]	1
pda-miR160b_L+2R-2	PDK_30s718951g001	0.5	20.267	1	21	1379	1399	UAUGCCUGGCUCCCUGUAUGC	GCAUACAGGGAGCCAGGCAUG	Cleavage	[locus_tag="PDK_30s718951L001"] [product="similar to predicted protein"] [strand="+"]	1
pda-miR160b_L+2R-2	PDK_30s951701g002	0.5	19.324	1	21	800	820	UAUGCCUGGCUCCCUGUAUGC	GCAUGCAGGGAGCCAGGCAUA	Cleavage	[locus_tag="PDK_30s951701L002"] [product="auxin response"] [strand="+"]	1
pda-miR160b_L+2R-2	PDK_30s966231g001	2.5	19.635	1	20	1325	1344	UAUGCCUGGCUCCCUGUAUG	CAAGUAGGGAGCCAGGCAUG	Cleavage	[locus_tag="PDK_30s966231L001"] [product="similar to predicted protein"] [strand="+"]	1
pda-miR160b_L+2R-2	PDK_30s827291g004	2.5	16.783	1	20	1474	1493	UAUGCCUGGCUCCCUGUAUG	CUUACAGAGAGCCAGGUAUA	Cleavage	[locus_tag="PDK_30s827291L004"] [product="partial gene, no protein identified"] [strand="-"]	1
pda-miR160b_L+2R-2	PDK_30s925571g001	3	21.802	1	20	1505	1524	UAUGCCUGGCUCCCUGUAUG	UAUGCAGGGAGGCGGGCAUG	Translation	[locus_tag="PDK_30s925571L001"] [product="aaa family cdc48 subfamily"] [strand="+"]	1
pda-miR479_R-2_1ss12TC	PDK_30s821571g001	2.5	17.681	1	20	329	348	CGUGAUAUUGGCUCGGCUCA	UGAGUAGAGCCAGUAUCAUG	Cleavage	[locus_tag="PDK_30s821571L001"] [product="plastid alpha-amylase"] [strand="-"]	1
pda-miR479_R-2_1ss12TC	PDK_30s956031g003	3	19.809	1	20	792	811	CGUGAUAUUGGCUCGGCUCA	UGGGCGGAGCCAGUAUUAUG	Cleavage	[locus_tag="PDK_30s956031L003"] [product="partial gene, no protein identified"] [strand="+"]	1
pda-miR164b-3p_2ss16AT20TC	PDK_30s728541g001	2.5	19.267	1	21	1147	1167	CAUGUGCCCAUCUUCUCCACC	GGAGGAGAAAAUGGGCAUAUG	Cleavage	[locus_tag="PDK_30s728541L001"] [product="double-stranded rna binding"] [strand="-"]	1
pda-miR164b-3p_2ss16AT20TC	PDK_30s729801g001	3	24.551	1	21	112	132	CAUGUGCCCAUCUUCUCCACC	GGUGGGAAGGAUUGGCACAUG	Translation	[locus_tag="PDK_30s729801L001"] [product="partial gene, no protein identified"] [strand="+"]	1
pda-miR164b-3p_2ss16AT20TC	PDK_30s831041g011	3	16.255	1	20	784	803	CAUGUGCCCAUCUUCUCCAC	UUGUAGAACAUGGGCACAUG	Cleavage	[locus_tag="PDK_30s831041L011"] [product="acs-like protein"] [strand="-"]	1
pda-miR157d-3p_1ss17TC	PDK_30s680571g004	2	17.671	1	20	1	20	GCUCUCUAUGCUUCUGCCAU	AUGGCAGAAGCAAAGGGAGU	Cleavage	[locus_tag="PDK_30s680571L004"] [product="partial gene, no protein identified"] [strand="+"]	1
pda-miR157d-3p_1ss17TC	PDK_30s65509163g004	3	20.953	1	20	719	738	GCUCUCUAUGCUUCUGCCAU	AUAGCACAAGCAUGGAGAGU	Cleavage	[locus_tag="PDK_30s65509163L004"] [product="glycosyltransferase family 14 protein core-2i-branching enzyme family protein"] [strand="-"]	1
pda-miR168a_1ss21AT	PDK_30s1043821g002	3	15.069	1	20	650	669	UCGCUUGGUGCAGGUCGGGA	UCCCAACUUGCAACAAGUGA	Cleavage	[locus_tag="PDK_30s1043821L002"] [product="partial gene, no protein identified"] [strand="-"]	1
pda-miR160e-3p_2ss11TA21GA	PDK_30s743001g001	3	9.93	1	20	566	585	GCGUGCGAGGAGCCAAGCAU	AAGUUUGGCUCUUCGCAUGU	Cleavage	[locus_tag="PDK_30s743001L001"] [product="similar to predicted protein"] [strand="-"]	1
pda-miR160e-3p_2ss11TA21GA	PDK_30s709101g006	3	21.068	1	20	433	452	GCGUGCGAGGAGCCAAGCAU	AUGCCUGGCUCCCUGCAUGC	Cleavage	[locus_tag="PDK_30s709101L006"] [product="auxin response"] [strand="-"]	1
pda-miR160e-3p_2ss11TA21GA	PDK_30s996571g002	3	22.849	1	20	485	504	GCGUGCGAGGAGCCAAGCAU	AUGAUUGGGUCCUUGCAUGC	Cleavage	[locus_tag="PDK_30s996571L002"] [product="protein kinase"] [strand="-"]	1
pda-3p-250092_25	PDK_30s984331g001	3	21.239	1	20	521	540	UUAAGUGAAGUCGGCAACCG	CGACUGCUGACUUCAUUUAA	Cleavage	[locus_tag="PDK_30s984331L001"] [product="Os03g0112800"] [strand="+"]	1
pda-3p-417972_12	PDK_30s898621g008	3	15.211	1	25	2577	2601	UUUGGGCACCUGGACAUUUGGCACC	GGUGCCUAGUGUCCAAGUGUCCAAA	Translation	[locus_tag="PDK_30s898621L008"] [product="similar to predicted protein"] [strand="-"]	1
pda-3p-417972_12	PDK_30s696771g004	1.5	14.653	1	26	21	46	UUUGGGCACCUGGACAUUUGGCACCA	UGGCAUCAAAUGUUCAAGUGCCCAAA	Translation	[locus_tag="PDK_30s696771L004"] [product="partial gene, no protein identified"] [strand="+"]	1
pda-3p-274391_21	PDK_30s889891g005	2.5	18.634	1	22	3807	3828	CAAGUGUUCUAAGGAAAGAAGC	GAUUGUUUCCUUGGGACAUUUG	Cleavage	[locus_tag="PDK_30s889891L005"] [product="partial gene, no protein identified"] [strand="+"]	1
pda-3p-274391_21	PDK_30s738571g007	2.5	6.392	1	20	530	549	CAAGUGUUCUAAGGAAAGAA	UUCUUUUCUUCGCACACUUG	Translation	[locus_tag="PDK_30s738571L007"] [product="phosphate starvation response regulator-like"] [strand="-"]	1
pda-3p-274391_21	PDK_30s927361g003	3	11.953	1	21	240	260	CAAGUGUUCUAAGGAAAGAAG	UUUGUUUUCUUAGCAUACUUG	Cleavage	[locus_tag="PDK_30s927361L003"] [product="abc transporter"] [strand="-"]	1
pda-3p-91106_124	PDK_30s65509720g003	2.5	19.272	1	21	216	236	CCUGUGCUUGCCUCCUCCACU	GGUGGAGGAGGCAACCAUGGG	Cleavage	[locus_tag="PDK_30s65509720L003"] [product="partial gene, no protein identified"] [strand="+"]	1
pda-3p-91106_124	PDK_30s975301g003	3	24.843	1	21	354	374	CCUGUGCUUGCCUCCUCCACU	GGUGGUGGAGGCAGGCAAAGG	Cleavage	[locus_tag="PDK_30s975301L003"] [product="partial gene, no protein identified"] [strand="+"]	1
pda-3p-91106_124	PDK_30s996721g001	3	22.652	1	20	614	633	CCUGUGCUUGCCUCCUCCAC	GUGGAGGAGGCAAACACAAG	Cleavage	[locus_tag="PDK_30s996721L001"] [product="at3g17170 k14a17_29"] [strand="-"]	1
pda-3p-91106_124	PDK_30s1038271g005	3	15.039	1	21	195	215	CCUGUGCUUGCCUCCUCCACU	GGUGGGCGAGCCAGGCACAGG	Translation	[locus_tag="PDK_30s1038271L005"] [product="partial gene, no protein identified"] [strand="+"]	1
pda-3p-437970_11	PDK_30s655381g001	2.5	21.48	1	20	652	671	UCGCCUGCUGCAGCCUCCGC	GCGGAGGUUGCGGUAGGUGG	Cleavage	[locus_tag="PDK_30s655381L001"] [product="similar to predicted protein"] [strand="-"]	1
pda-3p-437970_11	PDK_30s1116851g003	3	21.837	1	21	5	25	UCGCCUGCUGCAGCCUCCGCC	GGCGGAGGCGGCAGUAAGCGA	Cleavage	[locus_tag="PDK_30s1116851L003"] [product="partial gene, no protein identified"] [strand="-"]	1
pda-3p-437970_11	PDK_30s879181g002	3	15.129	1	20	265	284	UCGCCUGCUGCAGCCUCCGC	GCGGAGGAUGCGGCAGGAGA	Cleavage	[locus_tag="PDK_30s879181L002"] [product="partial gene, no protein identified"] [strand="+"]	1
pda-3p-262764_23	PDK_30s733111g001	3	19.715	1	21	3216	3236	CCGGAUCUCUGUUUCAAACGA	UCGUUUGAAGCAGAUGUUCGG	Cleavage	[locus_tag="PDK_30s733111L001"] [product="partial gene, no protein identified"] [strand="+"]	1
pda-3p-262764_23	PDK_30s760421g001	2.5	16.974	1	20	1200	1219	CCGGAUCUCUGUUUCAAACG	CCUUUGGAACAAAGAUCCGG	Translation	[locus_tag="PDK_30s760421L001"] [product="rna-dependent rna polymerase"] [strand="-"]	1
pda-3p-262764_23	PDK_30s675901g003	3	16.888	1	20	43	63	CCGGAUCU-CUGUUUCAAACG	UGUUUGAAACAGGAGAUCCGU	Translation	[locus_tag="PDK_30s675901L003"] [product="dna binding"] [strand="+"]	1
pda-3p-374825_14	PDK_30s981871g001	3	17.573	1	22	458	479	AUGCGGACCCCAGAAUCGGACA	UAUCCGAUUUUGGGCUCUGUGU	Cleavage	[locus_tag="PDK_30s981871L001"] [product="cbl-interacting protein kinase 23"] [strand="+"]	1
pda-3p-340060_16	PDK_30s868111g007	3	11.12	1	22	901	922	AAAUACUCAUUUGGGCAAGAUG	CGUCUUGUCCACAUGAGCAUUU	Translation	[locus_tag="PDK_30s868111L007"] [product="translational activator"] [strand="-"]	1
pda-5p-276361_21	PDK_30s666771g006	3	14.589	1	21	957	977	UCUGUCGCAGGAGAGAUGAUG	CAUCAUCUCUCUUGCAGCAGG	Cleavage	[locus_tag="PDK_30s666771L006"] [product="serine-threonine kinase"] [strand="+"]	1
pda-5p-276361_21	PDK_30s888931g001	2.5	21.517	1	20	1240	1259	UCUGUCGCAGGAGAGAUGAU	AUUAUCUCUCUUGCGACGGC	Cleavage	[locus_tag="PDK_30s888931L001"] [product="s-receptor kinase"] [strand="+"]	1
pda-5p-276361_21	PDK_30s1008081g001	2.5	23.955	1	21	951	971	UCUGUCGCAGGAGAGAUGAUG	UAUCAUCUCUCUUUCGGCAGG	Cleavage	[locus_tag="PDK_30s1008081L001"] [product="serine-threonine kinase"] [strand="+"]	1
pda-5p-427445_11	PDK_30s736671g001	3	20.738	1	22	634	655	UUUGGACCCAGACCCGACCCGG	UUGGUUCUGGCCUGGGUCCAAA	Cleavage	[locus_tag="PDK_30s736671L001"] [product="r2r3 myb transcription factor myb-if35"] [strand="-"]	1
pda-5p-239350_26	PDK_30s904561g014	1	12.329	1	25	190	214	CAUGAAGGAUCAUCUCUGCUUUACU	ACUGCAGCAAAGAUGAUCCUUCAUG	Cleavage	[locus_tag="PDK_30s904561L014"] [product="partial gene, no protein identified"] [strand="+"]	1
pda-5p-239350_26	PDK_30s851441g001	2.5	24.383	1	23	36	59	CAUGAAGG-AUCAUCUCUGCUUUA	UGGAGCAGGGAUGAUACCUUCAUG	Translation	[locus_tag="PDK_30s851441L001"] [product="partial gene, no protein identified"] [strand="+"]	1
pda-5p-239350_26	PDK_30s1172411g001	3	15.685	1	22	217	238	CAUGAAGGAUCAUCUCUGCUUU	GAGGAAGAGAUUAUCCUUUAUG	Translation	[locus_tag="PDK_30s1172411L001"] [product="similar to predicted protein"] [strand="+"]	1
pda-miR169a_R-1	PDK_30s6550962g001	2.5	19.996	1	20	1632	1651	UAGCCAAGGAUGACUUGCCU	AGGGAGGUCAUCUUUGGCUG	Cleavage	[locus_tag="PDK_30s6550962L001"] [product="partial gene, no protein identified"] [strand="+"]	1
pda-miR169j-3p_R+1_2ss18TG19CT	PDK_30s905321g003	3	22.226	1	20	126	144	GGCAGUCUCCUUGGCUAGUC	GGCU-GCCAAGGAGGCUGCC	Cleavage	[locus_tag="PDK_30s905321L003"] [product="partial gene, no protein identified"] [strand="+"]	1
pda-miR169a	PDK_30s6550962g001	2.5	19.996	1	20	1632	1651	UAGCCAAGGAUGACUUGCCU	AGGGAGGUCAUCUUUGGCUG	Cleavage	[locus_tag="PDK_30s6550962L001"] [product="partial gene, no protein identified"] [strand="+"]	1
pda-miR172a_1ss1AG	PDK_30s758731g001	0.5	14.903	1	21	285	305	GGAAUCUUGAUGAUGCUGCAU	AUGCAGCAUCAUCAAGAUUCU	Cleavage	[locus_tag="PDK_30s758731L001"] [product="partial gene, no protein identified"] [strand="-"]	1
pda-miR172a_1ss1AG	PDK_30s749921g002	0.5	14.657	1	21	1325	1345	GGAAUCUUGAUGAUGCUGCAU	GUGCAGCAUCAUCAGGAUUCC	Cleavage	[locus_tag="PDK_30s749921L002"] [product="ap2 domain-containing transcription factor"] [strand="+"]	1
pda-miR172a_1ss1AG	PDK_30s929391g001	2.5	23.688	1	20	2033	2052	GGAAUCUUGAUGAUGCUGCA	UGUGGCAUCAUCAAGAUGCC	Cleavage	[locus_tag="PDK_30s929391L001"] [product="rolled expressed"] [strand="+"]	1
pda-miR172a_1ss1AG	PDK_30s795501g001	2.5	20.598	1	21	3079	3099	GGAAUCUUGAUGAUGCUGCAU	AUGCAGCAUAAACAAGAUUCU	Translation	[locus_tag="PDK_30s795501L001"] [product="partial gene, no protein identified"] [strand="+"]	1
pda-miR172a_1ss1AG	PDK_30s862391g001	3	24.497	1	20	85	104	GGAAUCUUGAUGAUGCUGCA	UGCGGUGUCAUCAAGAAUCC	Cleavage	[locus_tag="PDK_30s862391L001"] [product="plasma membrane-type calcium atpase"] [strand="+"]	1
pda-miR172a_1ss1AG	PDK_30s1067401g004	3	12.853	1	20	1039	1058	GGAAUCUUGAUGAUGCUGCA	UGCAGCACUAUCAAGAUUUG	Cleavage	[locus_tag="PDK_30s1067401L004"] [product="ferredoxin-dependent glutamate synthase"] [strand="-"]	1
pda-miR529e_1ss21CA	PDK_30s756061g001	1.5	16.372	1	20	670	689	AGAAGAGAGAGAGUACAGCC	AGCUGUGCUCUCUCUCUUCU	Cleavage	[locus_tag="PDK_30s756061L001"] [product="partial gene, no protein identified"] [strand="+"]	1
pda-miR529e_1ss21CA	PDK_30s772931g003	2	13.697	1	21	441	461	AGAAGAGAGAGAGUACAGCCA	UGAUUGUGCUCUCUCUCUUCU	Cleavage	[locus_tag="PDK_30s772931L003"] [product="partial gene, no protein identified"] [strand="+"]	1
pda-miR529e_1ss21CA	PDK_30s774191g002	2.5	20.457	1	21	1241	1261	AGAAGAGAGAGAGUACAGCCA	UGGUUGAACUCUCUCUCUUCA	Cleavage	[locus_tag="PDK_30s774191L002"] [product="abscisic acid responsive elements-bindingfactor"] [strand="-"]	1
pda-miR529e_1ss21CA	PDK_30s704101g001	2.5	17.648	1	20	213	232	AGAAGAGAGAGAGUACAGCC	AGCUGUGCUCUCUCUCUUCG	Cleavage	[locus_tag="PDK_30s704101L001"] [product="partial gene, no protein identified"] [strand="-"]	1
pda-miR529e_1ss21CA	PDK_30s1025931g001	3	21.478	1	20	588	607	AGAAGAGAGAGAGUACAGCC	GGCCGUGCUCUUCCUCUUCU	Cleavage	[locus_tag="PDK_30s1025931L001"] [product="partial gene, no protein identified"] [strand="+"]	1
pda-miR529e_1ss21CA	PDK_30s905141g003	3	17.681	1	20	1918	1937	AGAAGAGAGAGAGUACAGCC	GGCUGAACUCGCUUUCUUUU	Translation	[locus_tag="PDK_30s905141L003"] [product="partial gene, no protein identified"] [strand="-"]	1
pda-miR156c_1ss13AG	PDK_30s789261g002	1.5	23.842	1	21	248	268	UUGACAGAAGAUGGAGAGCAC	GUGCUCUCUCUCUUCUGUCAA	Cleavage	[locus_tag="PDK_30s789261L002"] [product="partial gene, no protein identified"] [strand="+"]	1
pda-miR156c_1ss13AG	PDK_30s756061g001	1.5	21.536	1	21	674	694	UUGACAGAAGAUGGAGAGCAC	GUGCUCUCUCUCUUCUGUCAA	Cleavage	[locus_tag="PDK_30s756061L001"] [product="partial gene, no protein identified"] [strand="+"]	1
pda-miR156c_1ss13AG	PDK_30s882821g001	1.5	20.571	1	21	1365	1385	UUGACAGAAGAUGGAGAGCAC	GUGCUCUCUCUCUUCUGUCAA	Cleavage	[locus_tag="PDK_30s882821L001"] [product="partial gene, no protein identified"] [strand="+"]	1
pda-miR156c_1ss13AG	PDK_30s772931g003	2.5	15.287	1	21	446	466	UUGACAGAAGAUGGAGAGCAC	GUGCUCUCUCUCUUCUGUCAU	Cleavage	[locus_tag="PDK_30s772931L003"] [product="partial gene, no protein identified"] [strand="+"]	1
pda-miR156c_1ss13AG	PDK_30s670584g001	2.5	21.572	1	21	386	406	UUGACAGAAGAUGGAGAGCAC	GUGCUUCCUAUUUUCUGUCAA	Cleavage	[locus_tag="PDK_30s670584L001"] [product="3-hydroxyisobutyryl-coenzyme a expressed"] [strand="+"]	1
pda-miR156c_1ss13AG	PDK_30s814451g001	2.5	17.988	1	20	270	289	UUGACAGAAGAUGGAGAGCA	UGUUCUCCAUUUUUUGUUGA	Cleavage	[locus_tag="PDK_30s814451L001"] [product="mgdg synthase type a"] [strand="+"]	1
pda-miR156c_1ss13AG	PDK_30s704101g001	3	17.093	1	21	217	237	UUGACAGAAGAUGGAGAGCAC	GUGCUCUCUCUCUUCGGUCAA	Cleavage	[locus_tag="PDK_30s704101L001"] [product="partial gene, no protein identified"] [strand="-"]	1
pda-miR156c_1ss13AG	PDK_30s866631g001	2.5	19.01	1	20	97	116	UUGACAGAAGAUGGAGAGCA	UUCUCUCCAUUUUCUGUUGA	Cleavage	[locus_tag="PDK_30s866631L001"] [product="partial gene, no protein identified"] [strand="-"]	1
pda-miR156c_1ss13AG	PDK_30s961831g005	3	9.861	1	21	1117	1137	UUGACAGAAGAUGGAGAGCAC	GUGCCUUCCAUUUACUGUCAA	Cleavage	[locus_tag="PDK_30s961831L005"] [product="beta 3 galactosyltransferase"] [strand="-"]	1
pda-miR156c_1ss13AG	PDK_30s1164261g002	3	20.784	1	20	371	390	UUGACAGAAGAUGGAGAGCA	UGCUAUCCGUCUUCUGUUAC	Cleavage	[locus_tag="PDK_30s1164261L002"] [product="cationic amino acid transporter"] [strand="+"]	1
pda-miR156c_1ss13AG	PDK_30s703451g009	2.5	7.616	1	20	596	615	UUGACAGAAGAUGGAGAGCA	UGCACUCCUUUUUCUGUCAA	Cleavage	[locus_tag="PDK_30s703451L009"] [product="-alpha-glucan branching"] [strand="-"]	1
pda-miR156c_1ss13AG	PDK_30s928741g002	3	11.671	1	20	425	444	UUGACAGAAGAUGGAGAGCA	UGCUCUUCAUCUGCUGUGAA	Cleavage	[locus_tag="PDK_30s928741L002"] [product="cytokinin oxidase"] [strand="-"]	1
pda-miR164a-3p_1ss10TC	PDK_30s970901g001	3	21.606	1	20	84	103	CAUGUGCCCCUCUUCUCCAC	UUGGGGAAGAGGGGAACAUG	Cleavage	[locus_tag="PDK_30s970901L001"] [product="regulator of chromosome condensation familyprotein"] [strand="+"]	1
pda-miR172a-p5_1ss8CG	PDK_30s1013241g003	2	15.258	1	20	128	147	UUUGCUGGUGUGGCAUCAUC	GAUGAUGCAGCACCAGCAAG	Cleavage	[locus_tag="PDK_30s1013241L003"] [product="similar to predicted protein"] [strand="-"]	1
pda-miR172a-p5_1ss8CG	PDK_30s783011g009	2	8.344	1	20	1228	1247	UUUGCUGGUGUGGCAUCAUC	GACGAUGUCACACCAGCAGA	Cleavage	[locus_tag="PDK_30s783011L009"] [product="30s ribosomal protein s1"] [strand="+"]	1
pda-miR172a-p5_1ss8CG	PDK_30s758561g001	3	15.149	1	20	1394	1413	UUUGCUGGUGUGGCAUCAUC	AGUGAUGUCACAUUAGCAAA	Cleavage	[locus_tag="PDK_30s758561L001"] [product="receptor-like protein kinase"] [strand="-"]	1
pda-miR172a-p5_1ss8CG	PDK_30s795501g001	3	24.974	1	20	738	757	UUUGCUGGUGUGGCAUCAUC	UAUGGUGCCGUAUCAGCAAA	Cleavage	[locus_tag="PDK_30s795501L001"] [product="partial gene, no protein identified"] [strand="+"]	1
pda-miR172a-p5_1ss8CG	PDK_30s757051g005	2.5	19.663	1	20	611	630	UUUGCUGGUGUGGCAUCAUC	GAUGAUGCUAAGCCAGUAAA	Translation	[locus_tag="PDK_30s757051L005"] [product="retrotransposon like protein"] [strand="-"]	1
pda-miR172a-p5_1ss8CG	PDK_30s1070521g004	3	16.818	1	20	595	614	UUUGCUGGUGUGGCAUCAUC	GCUGAUGCCACACCAUCAGA	Cleavage	[locus_tag="PDK_30s1070521L004"] [product="similar to predicted protein"] [strand="+"]	1
pda-miR172a-p5_1ss8CG	PDK_30s1052541g002	3	15.416	1	20	72	91	UUUGCUGGUGUGGCAUCAUC	GAUGAUGCCACAACAUCAGA	Cleavage	[locus_tag="PDK_30s1052541L002"] [product="gaga-binding transcriptional activator"] [strand="+"]	1
pda-miR172a-p5_1ss8CG	PDK_30s803861g003	2.5	19.956	1	20	269	288	UUUGCUGGUGUGGCAUCAUC	GAUGCUGCCCCAUCAGCAAA	Translation	[locus_tag="PDK_30s803861L003"] [product="partial gene, no protein identified"] [strand="-"]	1
pda-miR172a-p5_1ss8CG	PDK_30s1153081g001	3	13.764	1	20	333	352	UUUGCUGGUGUGGCAUCAUC	GAUGAUGCCAAGCAAGCAAA	Translation	[locus_tag="PDK_30s1153081L001"] [product="partial gene, no protein identified"] [strand="+"]	1
pda-miR172a-p5_1ss8CG	PDK_30s657591g004	2.5	9.165	1	20	1588	1607	UUUGCUGGUGUGGCAUCAUC	GAUGAUGUCAAAGCAGCAAA	Translation	[locus_tag="PDK_30s657591L004"] [product="atp binding"] [strand="+"]	1
pda-miR172a-p5_1ss8CG	PDK_30s1082381g001	3	11.443	1	20	515	534	UUUGCUGGUGUGGCAUCAUC	GAUGAUGCAAGACCAGCAAC	Translation	[locus_tag="PDK_30s1082381L001"] [product="sulfate transporter"] [strand="-"]	1
pda-miR172a-p5_1ss8CG	PDK_30s1159491g002	3	12.673	1	20	501	520	UUUGCUGGUGUGGCAUCAUC	GGUGAUGACACAACAGCAAG	Cleavage	[locus_tag="PDK_30s1159491L002"] [product="partial gene, no protein identified"] [strand="+"]	1
pda-3p-259371_23	PDK_30s772551g001	2.5	17.775	1	20	5	24	CGAGCGACUGUGAUUGGUGG	AGACCAAUCACAGUCGUUCG	Cleavage	[locus_tag="PDK_30s772551L001"] [product="partial gene, no protein identified"] [strand="+"]	1
pda-3p-259371_23	PDK_30s891471g001	2.5	16.477	1	20	335	354	CGAGCGACUGUGAUUGGUGG	CCAACAAUCACAGUUGUUUG	Cleavage	[locus_tag="PDK_30s891471L001"] [product="gtp binding"] [strand="-"]	1
pda-3p-259371_23	PDK_30s1088671g003	2.5	19.844	1	20	141	160	CGAGCGACUGUGAUUGGUGG	CAACCAAUCGGAGUCGCUCG	Translation	[locus_tag="PDK_30s1088671L003"] [product="partial gene, no protein identified"] [strand="+"]	1
pda-miR172a	PDK_30s758731g001	0	14.903	1	21	285	305	AGAAUCUUGAUGAUGCUGCAU	AUGCAGCAUCAUCAAGAUUCU	Cleavage	[locus_tag="PDK_30s758731L001"] [product="partial gene, no protein identified"] [strand="-"]	1
pda-miR172a	PDK_30s749921g002	1.5	14.657	1	21	1325	1345	AGAAUCUUGAUGAUGCUGCAU	GUGCAGCAUCAUCAGGAUUCC	Cleavage	[locus_tag="PDK_30s749921L002"] [product="ap2 domain-containing transcription factor"] [strand="+"]	1
pda-miR172a	PDK_30s795501g001	2	20.598	1	21	3079	3099	AGAAUCUUGAUGAUGCUGCAU	AUGCAGCAUAAACAAGAUUCU	Translation	[locus_tag="PDK_30s795501L001"] [product="partial gene, no protein identified"] [strand="+"]	1
pda-miR172a	PDK_30s1122321g001	3	8.352	1	20	7	26	AGAAUCUUGAUGAUGCUGCA	UGCAGCAUUGUUAAGCUUCU	Cleavage	[locus_tag="PDK_30s1122321L001"] [product="_rbz domain protein"] [strand="-"]	1
pda-miR172a	PDK_30s1125961g002	3	15.454	1	21	633	653	AGAAUCUUGAUGAUGCUGCAU	AUGCAGCACCCUUGAGAUUCU	Translation	[locus_tag="PDK_30s1125961L002"] [product="abc transporter cholesterol phospholipidflippase"] [strand="-"]	1
pda-miR172a	PDK_30s1067401g004	3	12.853	1	20	1039	1058	AGAAUCUUGAUGAUGCUGCA	UGCAGCACUAUCAAGAUUUG	Cleavage	[locus_tag="PDK_30s1067401L004"] [product="ferredoxin-dependent glutamate synthase"] [strand="-"]	1
pda-miR172a	PDK_30s992641g001	3	16.554	1	20	358	377	AGAAUCUUGAUGAUGCUGCA	UGGAGCAUCAUCAAGAAUUU	Cleavage	[locus_tag="PDK_30s992641L001"] [product="partial gene, no protein identified"] [strand="-"]	1
pda-miR172a	PDK_30s776711g001	3	16.443	1	20	955	974	AGAAUCUUGAUGAUGCUGCA	UGCAGUAUCGUGGAGGUUCU	Translation	[locus_tag="PDK_30s776711L001"] [product="dnaj protein"] [strand="+"]	1
pda-miR172a	PDK_30s1197791g013	3	15.669	1	21	2877	2897	AGAAUCUUGAUGAUGCUGCAU	GUGUAUCAUCUUCAGGAUUCU	Translation	[locus_tag="PDK_30s1197791L013"] [product="similar to predicted protein"] [strand="-"]	1
pda-miR169_R-1_1ss1CT	PDK_30s6550962g001	2.5	19.996	1	20	1632	1651	UAGCCAAGGAUGACUUGCCU	AGGGAGGUCAUCUUUGGCUG	Cleavage	[locus_tag="PDK_30s6550962L001"] [product="partial gene, no protein identified"] [strand="+"]	1
pda-miR396g-3p_L-1R+2_1ss11CA	PDK_30s844931g003	2.5	22.93	1	20	1321	1340	UCAAGAAAGACGUGGGAAAA	UUUUCCUGCGUCUCUCUUGA	Cleavage	[locus_tag="PDK_30s844931L003"] [product="partial gene, no protein identified"] [strand="-"]	1
pda-miR396g-3p_L-1R+2_1ss11CA	PDK_30s747252g001	2.5	20.046	1	20	941	960	UCAAGAAAGACGUGGGAAAA	UUUUCUCUUGUCUUUCUUGG	Cleavage	[locus_tag="PDK_30s747252L001"] [product="similar to predicted protein"] [strand="-"]	1
pda-miR396g-3p_L-1R+2_1ss11CA	PDK_30s1087611g002	3	17.591	1	21	692	712	UCAAGAAAGACGUGGGAAAAC	GCUUUCCCUCGUCUUUCUUGC	Cleavage	[locus_tag="PDK_30s1087611L002"] [product="pumilio-family rna binding repeat containingexpressed"] [strand="+"]	1
pda-miR396g-3p_L-1R+2_1ss11CA	PDK_30s827411g002	2.5	17.305	1	20	1345	1364	UCAAGAAAGACGUGGGAAAA	UUUUUCCAUAUCUUUCUUGG	Translation	[locus_tag="PDK_30s827411L002"] [product="partial gene, no protein identified"] [strand="-"]	1
pda-miR396g-3p_L-1R+2_1ss11CA	PDK_30s905141g003	2.5	9.046	1	22	3144	3165	UCAAGAAAGACGUGGGAAAACA	UCUUUUUCCCCCUCUUUCUUGA	Translation	[locus_tag="PDK_30s905141L003"] [product="partial gene, no protein identified"] [strand="-"]	1
pda-miR396g-3p_L-1R+2_1ss11CA	PDK_30s1177951g006	2.5	5.684	1	22	3270	3291	UCAAGAAAGACGUGGGAAAACA	UCUUUUUCCCCUUCUUUCUUGA	Translation	[locus_tag="PDK_30s1177951L006"] [product="partial gene, no protein identified"] [strand="-"]	1
pda-miR396g-3p_L-1R+2_1ss11CA	PDK_30s771491g007	3	15.559	1	22	766	787	UCAAGAAAGACGUGGGAAAACA	UCUUCUCUCAUUUCUUUCUUGA	Translation	[locus_tag="PDK_30s771491L007"] [product="transcription factor"] [strand="-"]	1
pda-miR396g-3p_L-1R+2_1ss11CA	PDK_30s856251g001	3	13.683	1	22	179	200	UCAAGAAAGACGUGGGAAAACA	UUUUUUACCAUUUCUUUUUUGA	Translation	[locus_tag="PDK_30s856251L001"] [product="cytosolic monodehydroascorbate reductase"] [strand="+"]	1
pda-miR160a-3p_R-1	PDK_30s709101g006	2.5	21.068	1	20	433	452	GCGUGCAAGGAGCCAAGCAU	AUGCCUGGCUCCCUGCAUGC	Cleavage	[locus_tag="PDK_30s709101L006"] [product="auxin response"] [strand="-"]	1
pda-miR160a-3p_R-1	PDK_30s996571g002	2.5	22.849	1	20	485	504	GCGUGCAAGGAGCCAAGCAU	AUGAUUGGGUCCUUGCAUGC	Cleavage	[locus_tag="PDK_30s996571L002"] [product="protein kinase"] [strand="-"]	1
pda-miR169b-p5_1ss15TC	PDK_30s6550962g001	3	19.996	1	20	1632	1651	CAGCCAAGGAUGAUCUGCCG	AGGGAGGUCAUCUUUGGCUG	Cleavage	[locus_tag="PDK_30s6550962L001"] [product="partial gene, no protein identified"] [strand="+"]	1
pda-miR169b-p5_1ss15TC	PDK_30s6550940g002	3	18.717	1	20	1004	1023	CAGCCAAGGAUGAUCUGCCG	UGGCAUAUCAUAUUUGGCUG	Translation	[locus_tag="PDK_30s6550940L002"] [product="partial gene, no protein identified"] [strand="+"]	1
pda-miR171i-5p_1ss12TC	PDK_30s686061g002	2.5	9.954	1	20	1695	1714	AGGUAUUGGCGCGCCUCAAU	AUUGAGGAGCGCCAAUGCCA	Cleavage	[locus_tag="PDK_30s686061L002"] [product="kinase interacting family protein"] [strand="+"]	1
pda-miR171i-5p_1ss12TC	PDK_30s898701g007	3	15.616	1	20	1584	1603	AGGUAUUGGCGCGCCUCAAU	AUUGAGGUUCGCCAGUAUUU	Cleavage	[locus_tag="PDK_30s898701L007"] [product="partial gene, no protein identified"] [strand="+"]	1
pda-miR169d-p5_1ss14CA	PDK_30s704661g006	3	14.994	1	20	713	732	UAGCCAAGAAUGAAUUGCCU	AGGCAAUUGAUAUUUGGUUA	Translation	[locus_tag="PDK_30s704661L006"] [product="partial gene, no protein identified"] [strand="+"]	1
pda-miR169d-p5_1ss14CA	PDK_30s884261g003	3	21.871	1	20	32	50	UAGCCAAGAAUGAAUUGCCU	AGGCAAUUC-UUCUUGGCUU	Translation	[locus_tag="PDK_30s884261L003"] [product="mitochondrial transcription terminationfactor-like"] [strand="-"]	1
pda-miR169d-p5_1ss14CA	PDK_30s722171g012	3	15.872	1	20	959	978	UAGCCAAGAAUGAAUUGCCU	AGCAAAUUCCUUCUUGGCUA	Translation	[locus_tag="PDK_30s722171L012"] [product="neutral invertase"] [strand="+"]	1
pda-miR535_1ss13AG	PDK_30s1105251g001	3	13.652	1	20	2472	2491	UGACAACGAGAGGGAGCACG	UGUGGUCGCUCUCGUUGUUA	Cleavage	[locus_tag="PDK_30s1105251L001"] [product="plasma membrane-type calcium atpase"] [strand="+"]	1
pda-miR172c-p3_1ss11TC	PDK_30s758731g001	1.5	14.903	1	24	286	309	AAUGGGAAUCCUGAUGAUGCUGCA	UGCAGCAUCAUCAAGAUUCUCAUU	Translation	[locus_tag="PDK_30s758731L001"] [product="partial gene, no protein identified"] [strand="-"]	1
pda-miR172c-p3_1ss11TC	PDK_30s749921g002	3	21.301	1	24	1326	1349	AAUGGGAAUCCUGAUGAUGCUGCA	UGCAGCAUCAUCAGGAUUCCCGCC	Cleavage	[locus_tag="PDK_30s749921L002"] [product="ap2 domain-containing transcription factor"] [strand="+"]	1
pda-miR172c-p3_1ss11TC	PDK_30s858801g003	2	18.566	1	23	1329	1351	AAUGGGAAUCCUGAUGAUGCUGC	GCAGUAUCACCAGGAUUUCCAUU	Cleavage	[locus_tag="PDK_30s858801L003"] [product="similar to predicted protein"] [strand="+"]	1
pda-miR172c-p3_1ss11TC	PDK_30s1074861g014	3	13.305	1	23	461	483	AAUGGGAAUCCUGAUGAUGCUGC	GAAGCAUCAUCAGGGUGUUCAUU	Cleavage	[locus_tag="PDK_30s1074861L014"] [product="similar to predicted protein"] [strand="-"]	1
pda-miR172c-p3_1ss11TC	PDK_30s765961g002	3	20.01	1	23	722	744	AAUGGGAAUCCUGAUGAUGCUGC	GUGGCAUCAGCAGGCUUCCCAUC	Translation	[locus_tag="PDK_30s765961L002"] [product="cytochrome c oxidase subunit"] [strand="-"]	1
pda-miR172c-p3_1ss11TC	PDK_30s903531g003	2.5	14.368	1	22	600	621	AAUGGGAAUCCUGAUGAUGCUG	CGACACCAUCAGGAUUCUCAUU	Cleavage	[locus_tag="PDK_30s903531L003"] [product="partial gene, no protein identified"] [strand="-"]	1
pda-miR172c-p3_1ss11TC	PDK_30s671741g008	3	17.059	1	20	92	111	AAUGGGAAUCCUGAUGAUGC	CGAUCAUCAGGAUUCCCAUC	Cleavage	[locus_tag="PDK_30s671741L008"] [product="atp binding protein"] [strand="-"]	1
pda-miR172c-p3_1ss11TC	PDK_30s1116681g008	2.5	20.895	1	21	1375	1395	AAUGGGAAUCCUGAUGAUGCU	AGCCUCAUCGGGCUUCCCAUU	Translation	[locus_tag="PDK_30s1116681L008"] [product="pentatricopeptide repeat-containing protein"] [strand="-"]	1
pda-5p-370156_14	PDK_30s897571g001	3	16.527	1	24	1729	1752	ACCAUUCGCUUCCUGGUAGGUGUG	CACAUCUACAAGGAAGCGAAUUGU	Cleavage	[locus_tag="PDK_30s897571L001"] [product="partial gene, no protein identified"] [strand="+"]	1
pda-5p-364804_14	PDK_30s722171g011	3	22.813	1	24	236	259	AGUGCUGUGCAUCCUUGGAUGACC	GGUGGUCCAAGAUUGCGCAGCACU	Cleavage	[locus_tag="PDK_30s722171L011"] [product="typical p-type r2r3 myb protein"] [strand="+"]	1
pda-5p-364804_14	PDK_30s904561g004	3	16.751	1	21	628	649	AGUGCUGUG-CAUCCUUGGAUG	UAUCCAAGGAUGACAUAGUACU	Translation	[locus_tag="PDK_30s904561L004"] [product="calmodulin-domain protein kinase cdpk isoform 5"] [strand="-"]	1
pda-5p-364804_14	PDK_30s913641g002	3	18.141	1	21	1107	1127	AGUGCUGUGCAUCCUUGGAUG	CAUCCUUGGAGGCACAGCACU	Translation	[locus_tag="PDK_30s913641L002"] [product="atp-binding cassette"] [strand="+"]	1
pda-5p-364804_14	PDK_30s801031g001	3	13.87	1	20	15	34	AGUGCUGUGCAUCCUUGGAU	AUUAGAGGAUUCACAGCACU	Translation	[locus_tag="PDK_30s801031L001"] [product="partial gene, no protein identified"] [strand="+"]	1
pda-5p-367016_14	PDK_30s1139331g004	2	19.932	1	20	841	860	CCUUCUGUUCGGCUGCACAG	GUGCGCAGCCGAACAGAAGG	Cleavage	[locus_tag="PDK_30s1139331L004"] [product="at1g18740 f6a14_15"] [strand="+"]	1
pda-5p-367016_14	PDK_30s893951g004	3	19.059	1	21	327	347	CCUUCUGUUCGGCUGCACAGU	ACUGUGCACCAGAAUAGGAGG	Translation	[locus_tag="PDK_30s893951L004"] [product="partial gene, no protein identified"] [strand="-"]	1
pda-5p-321868_17	PDK_30s700771g006	3	19.122	1	22	234	255	AGGGCUGGAGUCGACUCCUGCA	UGCCGGAGUUGAUCCCAGCCCU	Translation	[locus_tag="PDK_30s700771L006"] [product="extracellular calcium sensing receptor"] [strand="+"]	1
pda-5p-321868_17	PDK_30s746701g003	3	21.012	1	20	550	569	AGGGCUGGAGUCGACUCCUG	AAGGAGUCGGUUUCAGCCUU	Cleavage	[locus_tag="PDK_30s746701L003"] [product="unnamed protein product"] [strand="+"]	1
pda-3p-228238_28-R15	PDK_30s677091g001	3	14.689	1	21	2444	2464	ACGCUUAAAAGCGUCGGCAUA	UAUCCUGGCGGUUUUAAGCGU	Translation	[locus_tag="PDK_30s677091L001"] [product="partial gene, no protein identified"] [strand="-"]	1
pda-3p-228238_28-R15	PDK_30s995921g001	3	23.582	1	20	254	273	ACGCUUAAAAGCGUCGGCAU	CUGCCGGCGCUCUUGAGCGU	Translation	[locus_tag="PDK_30s995921L001"] [product="late embryogenesis abundant protein lea14-a"] [strand="-"]	1
pda-5p-148449_56	PDK_30s922321g001	2.5	11.922	1	22	76	97	UUUUGCUGAUGGUCAUCUAAUC	GAUAAGAUAAUCAUCAGCAAAA	Cleavage	[locus_tag="PDK_30s922321L001"] [product="partial gene, no protein identified"] [strand="-"]	1
pda-5p-482466_10	PDK_30s974151g011	3	16.551	1	22	411	432	AGAGACAGGGUUCGAACUCAGA	UCUGAAUUCGAAAUCUGUUUCU	Translation	[locus_tag="PDK_30s974151L011"] [product="partial gene, no protein identified"] [strand="+"]	1
pda-5p-164396_48	PDK_30s1088391g001	3	15.432	1	20	1316	1335	AAAGCGUCGGAAAAGGUUGG	CCAUCCUUUUCUGAUGCUUG	Cleavage	[locus_tag="PDK_30s1088391L001"] [product="similar to predicted protein"] [strand="-"]	1
pda-5p-164396_48	PDK_30s710451g007	2.5	14.541	1	20	2207	2226	AAAGCGUCGGAAAAGGUUGG	CCAAGCUUUUCCAAUGCUUU	Cleavage	[locus_tag="PDK_30s710451L007"] [product="chromatin assembly factor subunit"] [strand="-"]	1
pda-3p-423087_12	PDK_30s1187081g009	1.5	22.183	1	20	4832	4851	AAUGCCAUUGAUAGCCGUAG	CUACUGCUGUCAAUGGCAUU	Cleavage	[locus_tag="PDK_30s1187081L009"] [product="phosphatidylinositol-4-phosphate 5-kinase familyexpressed"] [strand="-"]	1
pda-3p-228238_28	PDK_30s677091g001	3	14.689	1	21	2444	2464	ACGCUUAAAAGCGUCGGCAUA	UAUCCUGGCGGUUUUAAGCGU	Translation	[locus_tag="PDK_30s677091L001"] [product="partial gene, no protein identified"] [strand="-"]	1
pda-3p-228238_28	PDK_30s995921g001	3	23.582	1	20	254	273	ACGCUUAAAAGCGUCGGCAU	CUGCCGGCGCUCUUGAGCGU	Translation	[locus_tag="PDK_30s995921L001"] [product="late embryogenesis abundant protein lea14-a"] [strand="-"]	1
pda-3p-413562_12	PDK_30s1029101g001	3	14.814	1	23	666	688	AAUGGACAUGGAUACGAAUCGGA	UGUGAUUUGUGUCUGUGUCCAUG	Cleavage	[locus_tag="PDK_30s1029101L001"] [product="partial gene, no protein identified"] [strand="-"]	1
pda-5p-426126_11	PDK_30s703171g006	3	24.565	1	22	590	611	UUUUGGACCCAGACCCAACCCG	UGGGUUUGGUCUGGGUUUGAGA	Cleavage	[locus_tag="PDK_30s703171L006"] [product="dna binding"] [strand="-"]	1
pda-miR172i-3p	PDK_30s758731g001	0.5	14.903	1	21	285	305	GGAAUCUUGAUGAUGCUGCAU	AUGCAGCAUCAUCAAGAUUCU	Cleavage	[locus_tag="PDK_30s758731L001"] [product="partial gene, no protein identified"] [strand="-"]	1
pda-miR172i-3p	PDK_30s749921g002	0.5	14.657	1	21	1325	1345	GGAAUCUUGAUGAUGCUGCAU	GUGCAGCAUCAUCAGGAUUCC	Cleavage	[locus_tag="PDK_30s749921L002"] [product="ap2 domain-containing transcription factor"] [strand="+"]	1
pda-miR172i-3p	PDK_30s929391g001	2.5	23.688	1	20	2033	2052	GGAAUCUUGAUGAUGCUGCA	UGUGGCAUCAUCAAGAUGCC	Cleavage	[locus_tag="PDK_30s929391L001"] [product="rolled expressed"] [strand="+"]	1
pda-miR172i-3p	PDK_30s795501g001	2.5	20.598	1	21	3079	3099	GGAAUCUUGAUGAUGCUGCAU	AUGCAGCAUAAACAAGAUUCU	Translation	[locus_tag="PDK_30s795501L001"] [product="partial gene, no protein identified"] [strand="+"]	1
pda-miR172i-3p	PDK_30s862391g001	3	24.497	1	20	85	104	GGAAUCUUGAUGAUGCUGCA	UGCGGUGUCAUCAAGAAUCC	Cleavage	[locus_tag="PDK_30s862391L001"] [product="plasma membrane-type calcium atpase"] [strand="+"]	1
pda-miR172i-3p	PDK_30s1067401g004	3	12.853	1	20	1039	1058	GGAAUCUUGAUGAUGCUGCA	UGCAGCACUAUCAAGAUUUG	Cleavage	[locus_tag="PDK_30s1067401L004"] [product="ferredoxin-dependent glutamate synthase"] [strand="-"]	1
pda-miR394a-5p	PDK_30s1008061g001	0	24.438	1	20	906	925	UUGGCAUUCUGUCCACCUCC	GGAGGUGGACAGAAUGCCAA	Cleavage	[locus_tag="PDK_30s1008061L001"] [product="partial gene, no protein identified"] [strand="+"]	1
pda-miR394a-5p	PDK_30s855351g001	3	18.641	1	20	1033	1052	UUGGCAUUCUGUCCACCUCC	AGAGGUGGGCAGAAGGCCAA	Cleavage	[locus_tag="PDK_30s855351L001"] [product="dna binding"] [strand="+"]	1
pda-miR394a-5p	PDK_30s770751g001	3	20.627	1	20	277	296	UUGGCAUUCUGUCCACCUCC	GGAGGUGGGCAGAAUGCAAC	Cleavage	[locus_tag="PDK_30s770751L001"] [product="partial gene, no protein identified"] [strand="+"]	1
pda-miR394a-5p	PDK_30s885271g002	2.5	19.318	1	20	599	618	UUGGCAUUCUGUCCACCUCC	GGUGUUGGACAGGAUGCCAA	Cleavage	[locus_tag="PDK_30s885271L002"] [product="pentatricopeptide repeat-containing"] [strand="+"]	1
pda-miR394a-5p	PDK_30s806321g007	3	18.555	1	20	166	185	UUGGCAUUCUGUCCACCUCC	GAAGGUGGACAAGAUGUCAA	Translation	[locus_tag="PDK_30s806321L007"] [product="peroxin pex14"] [strand="+"]	1
pda-miR394a-5p	PDK_30s752251g001	3	16.564	1	20	775	794	UUGGCAUUCUGUCCACCUCC	GGAGGAGGAGACAAUGCCAA	Translation	[locus_tag="PDK_30s752251L001"] [product="alpha-glucan water chloroplast"] [strand="+"]	1
pda-miR399a	PDK_30s729341g005	2.5	16.895	1	21	611	631	UGCCAAAGGAGAGUUGCCCUG	UAGGGUAACUUUCCCUUGGCA	Cleavage	[locus_tag="PDK_30s729341L005"] [product="partial gene, no protein identified"] [strand="-"]	1
pda-miR399a	PDK_30s852621g001	3	24.531	1	20	779	797	UGCCAAAGGAGAGUUGCCCU	AGGGCAACU-UCCUUUGGUG	Translation	[locus_tag="PDK_30s852621L001"] [product="partial gene, no protein identified"] [strand="-"]	1
pda-miR168a_R+3	PDK_30s1043821g002	3	15.069	1	21	649	669	UCGCUUGGUGCAGGUCGGGAA	UUCCCAACUUGCAACAAGUGA	Cleavage	[locus_tag="PDK_30s1043821L002"] [product="partial gene, no protein identified"] [strand="-"]	1
pda-miR169e-3p_R+1_1ss19CT	PDK_30s842981g003	2.5	14.573	1	20	1850	1869	GGCAGUCUCCUUGGCUAGUA	UACUAUUCAAGGAGAUUGUC	Cleavage	[locus_tag="PDK_30s842981L003"] [product="similar to predicted protein"] [strand="+"]	1
pda-miR169e-3p_R+1_1ss19CT	PDK_30s970051g001	3	21.959	1	20	653	672	GGCAGUCUCCUUGGCUAGUA	UGCUAGCAAAGGCGACUGCU	Cleavage	[locus_tag="PDK_30s970051L001"] [product="dihydrolipoamide s-acetyltransferase"] [strand="+"]	1
pda-miR172b-5p	PDK_30s1082091g001	3	20.388	1	20	2146	2165	GUAGCAUCAUCAAGAUUCAC	CUGAAUCUUGGUGAUGUUGU	Cleavage	[locus_tag="PDK_30s1082091L001"] [product="similar to predicted protein"] [strand="-"]	1
pda-miR172b-5p	PDK_30s1177571g003	3	16.769	1	20	700	719	GUAGCAUCAUCAAGAUUCAC	GUGAAUUUUGAUGGAGCUAU	Cleavage	[locus_tag="PDK_30s1177571L003"] [product="retrotransposon unclassified"] [strand="+"]	1
pda-miR172b-5p	PDK_30s987941g001	2.5	20.891	1	20	92	111	GUAGCAUCAUCAAGAUUCAC	GAGAAUCCUGAUGAUGCUGC	Cleavage	[locus_tag="PDK_30s987941L001"] [product="floral homeotic protein"] [strand="-"]	1
pda-miR172b-5p	PDK_30s831331g002	3	10.552	1	20	1468	1487	GUAGCAUCAUCAAGAUUCAC	GAGAAUUUUGAUGAAGCUAC	Cleavage	[locus_tag="PDK_30s831331L002"] [product="ac079280_6 transposon"] [strand="+"]	1
pda-miR529-3p_1ss20TC	PDK_30s932621g001	2	23.046	1	20	3	22	GCUGUACCCUCUCUCUUCUC	GGGGAGAGGGAGGGUGCAGC	Cleavage	[locus_tag="PDK_30s932621L001"] [product="apetala1-like protein"] [strand="+"]	1
pda-miR529-3p_1ss20TC	PDK_30s902761g001	3	20.357	1	20	2862	2881	GCUGUACCCUCUCUCUUCUC	GAGGUGAGAGAGGGUACUGC	Cleavage	[locus_tag="PDK_30s902761L001"] [product="aminophospholipid atpase"] [strand="-"]	1
pda-miR529-3p_1ss20TC	PDK_30s703951g001	3	20.421	1	20	382	401	GCUGUACCCUCUCUCUUCUC	GAGAAGAGUGAGGGUGUAGG	Cleavage	[locus_tag="PDK_30s703951L001"] [product="ribosomal protein s6"] [strand="+"]	1
pda-miR529-3p_1ss20TC	PDK_30s728401g001	3	15.404	1	20	401	420	GCUGUACCCUCUCUCUUCUC	GGGAGGAGAAGGGGUACAGU	Translation	[locus_tag="PDK_30s728401L001"] [product="partial gene, no protein identified"] [strand="+"]	1
pda-miR529-3p_1ss20TC	PDK_30s1142071g002	3	15.84	1	20	315	334	GCUGUACCCUCUCUCUUCUC	GGGAAGAGAGGGUGUGCAGU	Cleavage	[locus_tag="PDK_30s1142071L002"] [product="partial gene, no protein identified"] [strand="+"]	1
pda-miR156g-5p_2ss13AG17GA	PDK_30s789261g002	1.5	23.842	1	21	248	268	UUGACAGAAGAUGGAGAGCAC	GUGCUCUCUCUCUUCUGUCAA	Cleavage	[locus_tag="PDK_30s789261L002"] [product="partial gene, no protein identified"] [strand="+"]	1
pda-miR156g-5p_2ss13AG17GA	PDK_30s756061g001	1.5	21.536	1	21	674	694	UUGACAGAAGAUGGAGAGCAC	GUGCUCUCUCUCUUCUGUCAA	Cleavage	[locus_tag="PDK_30s756061L001"] [product="partial gene, no protein identified"] [strand="+"]	1
pda-miR156g-5p_2ss13AG17GA	PDK_30s882821g001	1.5	20.571	1	21	1365	1385	UUGACAGAAGAUGGAGAGCAC	GUGCUCUCUCUCUUCUGUCAA	Cleavage	[locus_tag="PDK_30s882821L001"] [product="partial gene, no protein identified"] [strand="+"]	1
pda-miR156g-5p_2ss13AG17GA	PDK_30s772931g003	2.5	15.287	1	21	446	466	UUGACAGAAGAUGGAGAGCAC	GUGCUCUCUCUCUUCUGUCAU	Cleavage	[locus_tag="PDK_30s772931L003"] [product="partial gene, no protein identified"] [strand="+"]	1
pda-miR156g-5p_2ss13AG17GA	PDK_30s670584g001	2.5	21.572	1	21	386	406	UUGACAGAAGAUGGAGAGCAC	GUGCUUCCUAUUUUCUGUCAA	Cleavage	[locus_tag="PDK_30s670584L001"] [product="3-hydroxyisobutyryl-coenzyme a expressed"] [strand="+"]	1
pda-miR156g-5p_2ss13AG17GA	PDK_30s814451g001	2.5	17.988	1	20	270	289	UUGACAGAAGAUGGAGAGCA	UGUUCUCCAUUUUUUGUUGA	Cleavage	[locus_tag="PDK_30s814451L001"] [product="mgdg synthase type a"] [strand="+"]	1
pda-miR156g-5p_2ss13AG17GA	PDK_30s704101g001	3	17.093	1	21	217	237	UUGACAGAAGAUGGAGAGCAC	GUGCUCUCUCUCUUCGGUCAA	Cleavage	[locus_tag="PDK_30s704101L001"] [product="partial gene, no protein identified"] [strand="-"]	1
pda-miR156g-5p_2ss13AG17GA	PDK_30s866631g001	2.5	19.01	1	20	97	116	UUGACAGAAGAUGGAGAGCA	UUCUCUCCAUUUUCUGUUGA	Cleavage	[locus_tag="PDK_30s866631L001"] [product="partial gene, no protein identified"] [strand="-"]	1
pda-miR156g-5p_2ss13AG17GA	PDK_30s961831g005	3	9.861	1	21	1117	1137	UUGACAGAAGAUGGAGAGCAC	GUGCCUUCCAUUUACUGUCAA	Cleavage	[locus_tag="PDK_30s961831L005"] [product="beta 3 galactosyltransferase"] [strand="-"]	1
pda-miR156g-5p_2ss13AG17GA	PDK_30s1164261g002	3	20.784	1	20	371	390	UUGACAGAAGAUGGAGAGCA	UGCUAUCCGUCUUCUGUUAC	Cleavage	[locus_tag="PDK_30s1164261L002"] [product="cationic amino acid transporter"] [strand="+"]	1
pda-miR156g-5p_2ss13AG17GA	PDK_30s703451g009	2.5	7.616	1	20	596	615	UUGACAGAAGAUGGAGAGCA	UGCACUCCUUUUUCUGUCAA	Cleavage	[locus_tag="PDK_30s703451L009"] [product="-alpha-glucan branching"] [strand="-"]	1
pda-miR156g-5p_2ss13AG17GA	PDK_30s928741g002	3	11.671	1	20	425	444	UUGACAGAAGAUGGAGAGCA	UGCUCUUCAUCUGCUGUGAA	Cleavage	[locus_tag="PDK_30s928741L002"] [product="cytokinin oxidase"] [strand="-"]	1
pda-5p-231728_28-R12	PDK_30s6550952g012	2	22.864	1	21	463	483	AGCAGUGCUCUUUUCAACAAG	CUUGUUGAGAGGAUCACUGCU	Cleavage	[locus_tag="PDK_30s6550952L012"] [product="partial gene, no protein identified"] [strand="+"]	1
pda-5p-231728_28-R12	PDK_30s771671g001	3	18.477	1	24	1063	1086	AGCAGUGCUCUUUUCAACAAGCGA	UGGAUUGUAGAGAAGGGCAUUGUU	Cleavage	[locus_tag="PDK_30s771671L001"] [product="partial gene, no protein identified"] [strand="-"]	1
pda-5p-231728_28-R12	PDK_30s952041g001	3	12.161	1	23	238	260	AGCAGUGCUCUUUUCAACAAGCG	CAUUUUUUGAAAAAAGCAUUGUU	Translation	[locus_tag="PDK_30s952041L001"] [product="partial gene, no protein identified"] [strand="-"]	1
pda-5p-231728_28-R12	PDK_30s800041g001	3	12.654	1	20	178	197	AGCAGUGCUCUUUUCAACAA	UUGUUGAAGAGAACAAUGCU	Cleavage	[locus_tag="PDK_30s800041L001"] [product="partial gene, no protein identified"] [strand="+"]	1
pda-3p-263356_23-R14	PDK_30s672751g002	3	22.943	1	21	1567	1587	UCAGAUCAUGUUGCAGUUUCA	UGAAACUGUAGCAUCAUUUGA	Cleavage	[locus_tag="PDK_30s672751L002"] [product="partial gene, no protein identified"] [strand="-"]	1
pda-3p-263356_23-R14	PDK_30s1118371g003	3	14.094	1	23	1404	1426	UCAGAUCAUGUUGCAGUUUCAUC	GAGGAAACUGCAACACCAUUUGA	Cleavage	[locus_tag="PDK_30s1118371L003"] [product="chromatin remodeling complex subunit"] [strand="+"]	1
pda-3p-263356_23-R14	PDK_30s943301g013	3	21.643	1	20	1481	1500	UCAGAUCAUGUUGCAGUUUC	AAAGUUGCAACAGGAUCUGA	Cleavage	[locus_tag="PDK_30s943301L013"] [product="partial gene, no protein identified"] [strand="-"]	1
pda-5p-217347_31	PDK_30s656531g001	2.5	21.734	1	21	93	113	CCUGAAUCUGGUCUUUUGGUG	UACCAGAGGACCAGAUGCAGG	Cleavage	[locus_tag="PDK_30s656531L001"] [product="xyloglucan endotransglycosylase"] [strand="-"]	1
pda-5p-217347_31	PDK_30s776891g001	3	22.241	1	21	165	185	CCUGAAUCUGGUCUUUUGGUG	CACCGGAGGACCAGAUGCAGG	Cleavage	[locus_tag="PDK_30s776891L001"] [product="xyloglucan endotransglycosylase"] [strand="-"]	1
pda-5p-217347_31	PDK_30s868961g004	2.5	16.364	1	20	479	498	CCUGAAUCUGGUCUUUUGGU	ACCAAACGGCCUGAUUCAGG	Translation	[locus_tag="PDK_30s868961L004"] [product="o-methyltransferase family protein"] [strand="-"]	1
pda-5p-217347_31-R5	PDK_30s656531g001	2.5	21.734	1	21	93	113	CCUGAAUCUGGUCUUUUGGUG	UACCAGAGGACCAGAUGCAGG	Cleavage	[locus_tag="PDK_30s656531L001"] [product="xyloglucan endotransglycosylase"] [strand="-"]	1
pda-5p-217347_31-R5	PDK_30s776891g001	3	22.241	1	21	165	185	CCUGAAUCUGGUCUUUUGGUG	CACCGGAGGACCAGAUGCAGG	Cleavage	[locus_tag="PDK_30s776891L001"] [product="xyloglucan endotransglycosylase"] [strand="-"]	1
pda-5p-217347_31-R5	PDK_30s868961g004	2.5	16.364	1	20	479	498	CCUGAAUCUGGUCUUUUGGU	ACCAAACGGCCUGAUUCAGG	Translation	[locus_tag="PDK_30s868961L004"] [product="o-methyltransferase family protein"] [strand="-"]	1
pda-5p-231728_28	PDK_30s6550952g012	2	22.864	1	21	463	483	AGCAGUGCUCUUUUCAACAAG	CUUGUUGAGAGGAUCACUGCU	Cleavage	[locus_tag="PDK_30s6550952L012"] [product="partial gene, no protein identified"] [strand="+"]	1
pda-5p-231728_28	PDK_30s771671g001	3	18.477	1	24	1063	1086	AGCAGUGCUCUUUUCAACAAGCGA	UGGAUUGUAGAGAAGGGCAUUGUU	Cleavage	[locus_tag="PDK_30s771671L001"] [product="partial gene, no protein identified"] [strand="-"]	1
pda-5p-231728_28	PDK_30s952041g001	3	12.161	1	23	238	260	AGCAGUGCUCUUUUCAACAAGCG	CAUUUUUUGAAAAAAGCAUUGUU	Translation	[locus_tag="PDK_30s952041L001"] [product="partial gene, no protein identified"] [strand="-"]	1
pda-5p-231728_28	PDK_30s800041g001	3	12.654	1	20	178	197	AGCAGUGCUCUUUUCAACAA	UUGUUGAAGAGAACAAUGCU	Cleavage	[locus_tag="PDK_30s800041L001"] [product="partial gene, no protein identified"] [strand="+"]	1
pda-miR168a_R+1	PDK_30s1043821g002	3	15.069	1	21	649	669	UCGCUUGGUGCAGGUCGGGAA	UUCCCAACUUGCAACAAGUGA	Cleavage	[locus_tag="PDK_30s1043821L002"] [product="partial gene, no protein identified"] [strand="-"]	1
pda-miR477d_L+1	PDK_30s837021g002	1.5	24.109	1	21	46	66	ACUCUCCCUCAAGGGCUUCUC	GAGAAGCCUUUGAGGGAGAGC	Cleavage	[locus_tag="PDK_30s837021L002"] [product="partial gene, no protein identified"] [strand="+"]	1
pda-miR477d_L+1	PDK_30s777951g001	3	21.61	1	21	4	24	ACUCUCCCUCAAGGGCUUCUC	GAGAAGCCCUUUGGGGAGAUU	Translation	[locus_tag="PDK_30s777951L001"] [product="copia-type polyprotein"] [strand="+"]	1
pda-miR828a	PDK_30s989631g002	2.5	17.741	1	22	293	314	UCUUGCUCAAAUGAGUAUUCCA	UGUAAUAUCCAUUUGAGCAAGA	Cleavage	[locus_tag="PDK_30s989631L002"] [product="flavonoid o-methyltransferase related"] [strand="-"]	1
pda-miR828a	PDK_30s854461g001	3	19.692	1	20	405	424	UCUUGCUCAAAUGAGUAUUC	GAAUACUCAUUUCAUCAAGG	Cleavage	[locus_tag="PDK_30s854461L001"] [product="similar to predicted protein"] [strand="-"]	1
pda-miR828a	PDK_30s1077261g001	2.5	13.436	1	20	21	40	UCUUGCUCAAAUGAGUAUUC	GAAUGCUGAUUGGAGCAAGA	Translation	[locus_tag="PDK_30s1077261L001"] [product="glycerophosphoryl diester"] [strand="-"]	1
pda-miR828a	PDK_30s927361g003	3	16.961	1	20	616	635	UCUUGCUCAAAUGAGUAUUC	GGAUAUUAAUUUGAGUAAGG	Cleavage	[locus_tag="PDK_30s927361L003"] [product="abc transporter"] [strand="-"]	1
pda-miR828a	PDK_30s776601g001	3	16.1	1	20	234	253	UCUUGCUCAAAUGAGUAUUC	GAACACCUAUUUGGGCAAGA	Cleavage	[locus_tag="PDK_30s776601L001"] [product="retrotransposon ty1-copia subclass"] [strand="+"]	1
pda-miR395g_R-1	PDK_30s986061g002	2	20.774	1	20	128	147	UUGAAGUGUUUGGGGGAACU	AGUUCCUCCAAGCACUUCAU	Cleavage	[locus_tag="PDK_30s986061L002"] [product="atp sulfurylase"] [strand="+"]	1
pda-miR395g_R-1	PDK_30s1028201g011	1.5	19.246	1	20	1459	1478	UUGAAGUGUUUGGGGGAACU	GGUUCCACCAAACACUUCAA	Cleavage	[locus_tag="PDK_30s1028201L011"] [product="fkbp-rapamycin associated"] [strand="-"]	1
pda-miR395g_R-1	PDK_30s804591g003	3	12.168	1	20	2394	2413	UUGAAGUGUUUGGGGGAACU	AGUUCCCCCAGACCCUUCAU	Cleavage	[locus_tag="PDK_30s804591L003"] [product="brassinosteroid insensitive 1-associatedreceptor kinase 1"] [strand="+"]	1
pda-miR395g_R-1	PDK_30s1116731g004	3	7.158	1	20	698	717	UUGAAGUGUUUGGGGGAACU	GGUUCUCCCAGACACGUCAA	Cleavage	[locus_tag="PDK_30s1116731L004"] [product="33 kda secretory protein"] [strand="-"]	1
pda-miR395g_R-1	PDK_30s1060231g013	2.5	19.957	1	20	604	623	UUGAAGUGUUUGGGGGAACU	AGUCUCCUCAGACACUUCAA	Cleavage	[locus_tag="PDK_30s1060231L013"] [product="hsp associated protein like"] [strand="-"]	1
pda-miR395g_R-1	PDK_30s1061801g001	2.5	10.259	1	20	1431	1450	UUGAAGUGUUUGGGGGAACU	AGUAGCCUCAAACACUUCAA	Cleavage	[locus_tag="PDK_30s1061801L001"] [product="dna binding"] [strand="+"]	1
pda-miR395g_R-1	PDK_30s1186971g003	3	15.118	1	20	1756	1775	UUGAAGUGUUUGGGGGAACU	AGUUCCCCCAGAAGCUUUAG	Cleavage	[locus_tag="PDK_30s1186971L003"] [product="atp-dependent dna helicase"] [strand="-"]	1
pda-miR6424-p3_1ss2GC	PDK_30s1197031g001	2.5	24.919	1	20	1954	1973	UCGUGCCACGCUGUGUGCGU	ACGCAUGCAGCAUGGUACGA	Translation	[locus_tag="PDK_30s1197031L001"] [product="partial gene, no protein identified"] [strand="+"]	1
pda-5p-303859_18	PDK_30s838821g004	2.5	12.738	1	24	1954	1977	AAGGGACCUAUUCAAGAAAGGAGC	GCACCUUUUUUGAAUUGGUCCCUC	Translation	[locus_tag="PDK_30s838821L004"] [product="dna binding"] [strand="-"]	1
pda-5p-303859_18	PDK_30s1024561g014	2.5	18.454	1	21	307	327	AAGGGACCUAUUCAAGAAAGG	CCUUUCUUGGAUAGCUUCCUU	Cleavage	[locus_tag="PDK_30s1024561L014"] [product="partial gene, no protein identified"] [strand="+"]	1
pda-5p-303859_18	PDK_30s837491g003	2.5	12.039	1	23	39	61	AAGGGACCUAUUCAAGAAAGGAG	CUGUUUUCUUGAAUUCGUCCCUU	Translation	[locus_tag="PDK_30s837491L003"] [product="similar to predicted protein"] [strand="-"]	1
pda-5p-303859_18	PDK_30s1149641g003	2.5	21.758	1	20	18	37	AAGGGACCUAUUCAAGAAAG	GUUCCUUGAGUAGGUCCCUU	Cleavage	[locus_tag="PDK_30s1149641L003"] [product="partial gene, no protein identified"] [strand="-"]	1
pda-5p-303859_18	PDK_30s663101g004	3	13.437	1	21	681	701	AAGGGACCUAUUCAAGAAAGG	CUUCUCUUGGAUGGGUCCUUU	Cleavage	[locus_tag="PDK_30s663101L004"] [product="mrp-like abc transporter"] [strand="+"]	1
pda-5p-303859_18	PDK_30s893441g004	3	10.844	1	23	506	528	AAGGGACCUAUUCAAGAAAGGAG	CUGCUUUCUUGAACAAGUUCUUU	Translation	[locus_tag="PDK_30s893441L004"] [product="mim (hypersensitive to irradiation and mmc) atpbinding"] [strand="-"]	1
pda-5p-303859_18	PDK_30s1138961g002	3	11.874	1	21	778	798	AAGGGACCUAUUCAAGAAAGG	CUUUUCUUGCAUAUGUCUCUU	Cleavage	[locus_tag="PDK_30s1138961L002"] [product="dna repair protein rad50"] [strand="-"]	1
pda-5p-274880_21	PDK_30s65509337g001	2	16.786	1	24	542	565	AAUUGUACACAGAGAAUACUUAAC	GUUAUUUAUUCUCUGUGUACAAUU	Cleavage	[locus_tag="PDK_30s65509337L001"] [product="phd-finger family expressed"] [strand="+"]	1
pda-5p-274880_21	PDK_30s1164071g003	2.5	9.835	1	23	53	75	AAUUGUACACAGAGAAUACUUAA	UGAAAUAUUUUUUGUGUAUAAUU	Cleavage	[locus_tag="PDK_30s1164071L003"] [product="tpl protein binding protein homodimerizationtranscription repressor"] [strand="-"]	1
pda-5p-421095_12	PDK_30s1167841g003	3	16.853	1	21	648	668	AACUAGUCGGUGUCUAAGGUA	UGCCUUUGACAUCAACUAGUU	Cleavage	[locus_tag="PDK_30s1167841L003"] [product="fh protein nfh2"] [strand="-"]	1
pda-3p-313824_18	PDK_30s770411g002	3	20.905	1	22	522	543	AGGAGUCGACUCCAGCUCUGCA	UUUGGAGUUGCAGUCGACUUCU	Cleavage	[locus_tag="PDK_30s770411L002"] [product="similar to predicted protein"] [strand="+"]	1
pda-3p-313824_18	PDK_30s1046851g001	3	21.286	1	21	141	161	AGGAGUCGACUCCAGCUCUGC	GGAGAGCUGGAGAGGACUCCU	Translation	[locus_tag="PDK_30s1046851L001"] [product="partial gene, no protein identified"] [strand="+"]	1
pda-3p-313824_18	PDK_30s1122301g005	3	21.191	1	21	193	213	AGGAGUCGACUCCAGCUCUGC	GCUAAGCUGGAGUAGACUCCU	Cleavage	[locus_tag="PDK_30s1122301L005"] [product="unnamed protein product"] [strand="-"]	1
pda-3p-165824_47	PDK_30s6550926g007	2	20.95	1	21	251	271	CUCCCAAGCCUCAUUUCAUGG	CCAUGAAAUGGGAUUUGGGAG	Translation	[locus_tag="PDK_30s6550926L007"] [product="mitochondrial transcription terminationfactor-like"] [strand="-"]	1
pda-3p-165824_47	PDK_30s941071g001	2	15.207	1	21	292	312	CUCCCAAGCCUCAUUUCAUGG	CCAUUAAAUAAGGCUUGGGAG	Cleavage	[locus_tag="PDK_30s941071L001"] [product="reduced leaflet 1"] [strand="+"]	1
pda-3p-165824_47	PDK_30s884261g003	3	18.376	1	21	1044	1064	CUCCCAAGCCUCAUUUCAUGG	CCAUGAAAUGAGGCUCGGCAG	Cleavage	[locus_tag="PDK_30s884261L003"] [product="mitochondrial transcription terminationfactor-like"] [strand="-"]	1
pda-3p-165824_47	PDK_30s884261g004	3	22.68	1	21	1035	1055	CUCCCAAGCCUCAUUUCAUGG	CCAUGAAAUGAGGCUCGGCAG	Cleavage	[locus_tag="PDK_30s884261L004"] [product="similar to predicted protein"] [strand="-"]	1
pda-3p-165824_47	PDK_30s666791g001	3	21.151	1	20	2307	2326	CUCCCAAGCCUCAUUUCAUG	CAAGAAUCGAGGCUUGGGAG	Cleavage	[locus_tag="PDK_30s666791L001"] [product="partial gene, no protein identified"] [strand="+"]	1
pda-3p-336513_16	PDK_30s683781g001	3	6.705	1	20	141	160	ACCUCUGCCUCCUGCCCGGG	CUCGGGUAGGAGGUGGAGGA	Cleavage	[locus_tag="PDK_30s683781L001"] [product="partial gene, no protein identified"] [strand="-"]	1
pda-3p-336513_16	PDK_30s1169871g001	3	6.705	1	20	141	160	ACCUCUGCCUCCUGCCCGGG	CUCGGGUAGGAGGUGGAGGA	Cleavage	[locus_tag="PDK_30s1169871L001"] [product="partial gene, no protein identified"] [strand="-"]	1
pda-5p-342543_16	PDK_30s932091g001	3	14.989	1	20	440	459	UAAGUGAAGUCGGCAAAUUG	CAGCUUGCAGACUUCAUUUA	Cleavage	[locus_tag="PDK_30s932091L001"] [product="partial gene, no protein identified"] [strand="+"]	1
pda-3p-398802_13	PDK_30s694411g003	3	17.068	1	23	1095	1117	AAUGAAUGAGAGUCGCCCGCCUC	GUGGUGGGUAGUUCUCAUUCAUU	Cleavage	[locus_tag="PDK_30s694411L003"] [product="partial gene, no protein identified"] [strand="-"]	1
pda-3p-398802_13	PDK_30s830091g005	3	18.964	1	22	249	270	AAUGAAUGAGAGUCGCCCGCCU	AUGUGGGCGAUUCCCAUUCAUC	Translation	[locus_tag="PDK_30s830091L005"] [product="alcohol oxidase"] [strand="+"]	1
pda-5p-310639_18	PDK_30s799341g002	2.5	15.198	1	20	723	742	UCAUUGGGCCUAGUAGACUA	UGGUUUAUUAGGCUCGAUGA	Cleavage	[locus_tag="PDK_30s799341L002"] [product="nucleic acid binding"] [strand="+"]	1
pda-5p-310639_18	PDK_30s1117341g001	3	20.832	1	20	572	591	UCAUUGGGCCUAGUAGACUA	UAGUCUUUUAGGUUCGAUGA	Cleavage	[locus_tag="PDK_30s1117341L001"] [product="leucine rich repeat family expressed"] [strand="-"]	1
pda-3p-165824_47-R18	PDK_30s6550926g007	2	20.95	1	21	251	271	CUCCCAAGCCUCAUUUCAUGG	CCAUGAAAUGGGAUUUGGGAG	Translation	[locus_tag="PDK_30s6550926L007"] [product="mitochondrial transcription terminationfactor-like"] [strand="-"]	1
pda-3p-165824_47-R18	PDK_30s941071g001	2	15.207	1	21	292	312	CUCCCAAGCCUCAUUUCAUGG	CCAUUAAAUAAGGCUUGGGAG	Cleavage	[locus_tag="PDK_30s941071L001"] [product="reduced leaflet 1"] [strand="+"]	1
pda-3p-165824_47-R18	PDK_30s884261g003	3	18.376	1	21	1044	1064	CUCCCAAGCCUCAUUUCAUGG	CCAUGAAAUGAGGCUCGGCAG	Cleavage	[locus_tag="PDK_30s884261L003"] [product="mitochondrial transcription terminationfactor-like"] [strand="-"]	1
pda-3p-165824_47-R18	PDK_30s884261g004	3	22.68	1	21	1035	1055	CUCCCAAGCCUCAUUUCAUGG	CCAUGAAAUGAGGCUCGGCAG	Cleavage	[locus_tag="PDK_30s884261L004"] [product="similar to predicted protein"] [strand="-"]	1
pda-3p-165824_47-R18	PDK_30s666791g001	3	21.151	1	20	2307	2326	CUCCCAAGCCUCAUUUCAUG	CAAGAAUCGAGGCUUGGGAG	Cleavage	[locus_tag="PDK_30s666791L001"] [product="partial gene, no protein identified"] [strand="+"]	1
pda-3p-265953_23	PDK_30s1106101g003	3	20.321	1	25	1038	1062	AAGCUCUGGAUGGAACGCAAGAUAU	AGAUUUUGCGUUCUAUCAAGAGUUA	Cleavage	[locus_tag="PDK_30s1106101L003"] [product="iaa-amino acid hydrolase ilr1"] [strand="+"]	1
pda-3p-265953_23	PDK_30s1030181g009	3	16.756	1	23	403	425	AAGCUCUGGAUGGAACGCAAGAU	AUCUUGUUGUCCAUUCAGAGCUU	Cleavage	[locus_tag="PDK_30s1030181L009"] [product="similar to predicted protein"] [strand="+"]	1
pda-miR164a	PDK_30s1141931g003	2.5	22.196	1	20	642	661	UGGAGAAGCAGGGCACGUGC	UCACGUGACCUGCUUCUCCG	Cleavage	[locus_tag="PDK_30s1141931L003"] [product="nac domain ipr003441"] [strand="+"]	1
pda-miR164a	PDK_30s1198591g001	2	16.67	1	20	633	652	UGGAGAAGCAGGGCACGUGC	GCAAGUUCCCUGCUUCUCCA	Cleavage	[locus_tag="PDK_30s1198591L001"] [product="nac domain ipr003441"] [strand="+"]	1
pda-miR164a	PDK_30s658491g001	3	16.161	1	20	1256	1275	UGGAGAAGCAGGGCACGUGC	CCACGAGCCUUGCUUCUCCG	Cleavage	[locus_tag="PDK_30s658491L001"] [product="partial gene, no protein identified"] [strand="-"]	1
pda-miR164a	PDK_30s1181011g001	3	14.097	1	20	1316	1335	UGGAGAAGCAGGGCACGUGC	CCACGAGCCCUGCUUCUCUG	Cleavage	[locus_tag="PDK_30s1181011L001"] [product="partial gene, no protein identified"] [strand="-"]	1
pda-miR164a	PDK_30s747721g001	3	21.067	1	20	28	47	UGGAGAAGCAGGGCACGUGC	GCAUUUGCUCUGUUUCUUCA	Cleavage	[locus_tag="PDK_30s747721L001"] [product="beta-mannosidase 4"] [strand="+"]	1
pda-miR164a	PDK_30s830581g001	3	19.233	1	20	174	193	UGGAGAAGCAGGGCACGUGC	GCGCUUGUCCCGCUUCUCCA	Translation	[locus_tag="PDK_30s830581L001"] [product="partial gene, no protein identified"] [strand="-"]	1
pda-miR172h-5p_R-1_2ss2CT7GT	PDK_30s1082091g001	3	20.388	1	20	2146	2165	GUAGCAUCAUCAAGAUUCAC	CUGAAUCUUGGUGAUGUUGU	Cleavage	[locus_tag="PDK_30s1082091L001"] [product="similar to predicted protein"] [strand="-"]	1
pda-miR172h-5p_R-1_2ss2CT7GT	PDK_30s1177571g003	3	16.769	1	20	700	719	GUAGCAUCAUCAAGAUUCAC	GUGAAUUUUGAUGGAGCUAU	Cleavage	[locus_tag="PDK_30s1177571L003"] [product="retrotransposon unclassified"] [strand="+"]	1
pda-miR172h-5p_R-1_2ss2CT7GT	PDK_30s987941g001	2.5	20.891	1	20	92	111	GUAGCAUCAUCAAGAUUCAC	GAGAAUCCUGAUGAUGCUGC	Cleavage	[locus_tag="PDK_30s987941L001"] [product="floral homeotic protein"] [strand="-"]	1
pda-miR172h-5p_R-1_2ss2CT7GT	PDK_30s831331g002	3	10.552	1	20	1468	1487	GUAGCAUCAUCAAGAUUCAC	GAGAAUUUUGAUGAAGCUAC	Cleavage	[locus_tag="PDK_30s831331L002"] [product="ac079280_6 transposon"] [strand="+"]	1
pda-5p-190444_38	PDK_30s872941g001	2.5	13.995	1	24	360	383	AUUUGCUAGUGUUGUGGUACUUGG	CUAUGUACCACAACAGCAGCAGAU	Translation	[locus_tag="PDK_30s872941L001"] [product="nuclear transcription factor y subunit c-2"] [strand="+"]	1
pda-5p-190444_38	PDK_30s707661g002	3	14.655	1	23	2045	2066	AUUUGCUAGUGUUGUGGUACUUG	UAAGUACCACAGUAC-AGCAAAU	Cleavage	[locus_tag="PDK_30s707661L002"] [product="tpa_inf: class iv hd-zip protein hdz44"] [strand="+"]	1
pda-5p-190444_38	PDK_30s998471g001	3	18.14	1	21	472	492	AUUUGCUAGUGUUGUGGUACU	AGUGCAAUAACACGAGCAAAU	Cleavage	[locus_tag="PDK_30s998471L001"] [product="ras-related protein rab-18"] [strand="+"]	1
pda-miR156i-3p_L-1R+1_1ss22TG	PDK_30s740851g001	3	20.003	1	20	562	581	GCUCACUUCUCUUUCUGUCA	GGGCAGAAGGGGAAGUGGGC	Cleavage	[locus_tag="PDK_30s740851L001"] [product="partial gene, no protein identified"] [strand="+"]	1
pda-miR156i-3p_L-1R+1_1ss22TG	PDK_30s1066501g001	3	22.158	1	20	1048	1067	GCUCACUUCUCUUUCUGUCA	CGGCGGGAGGAGAAGUGAGC	Cleavage	[locus_tag="PDK_30s1066501L001"] [product="retrotransposon ty3-gypsy subclass"] [strand="-"]	1
pda-miR156i-3p_L-1R+1_1ss22TG	PDK_30s1131841g001	3	15.982	1	20	50	69	GCUCACUUCUCUUUCUGUCA	CGGCGGGAGGAGAAGUGAGC	Cleavage	[locus_tag="PDK_30s1131841L001"] [product="partial gene, no protein identified"] [strand="-"]	1
pda-miR156i-3p_L-1R+1_1ss22TG	PDK_30s1085741g001	3	18.773	1	21	634	654	GCUCACUUCUCUUUCUGUCAG	UUGGCAGGUGGAGAGGUGAGC	Cleavage	[locus_tag="PDK_30s1085741L001"] [product="bhlh transcription factor"] [strand="+"]	1
pda-miR156i-3p_L-1R+1_1ss22TG	PDK_30s732221g009	3	22.722	1	20	2909	2928	GCUCACUUCUCUUUCUGUCA	UGAAAGAAAGGGGAGUGAGG	Cleavage	[locus_tag="PDK_30s732221L009"] [product="partial gene, no protein identified"] [strand="+"]	1
pda-miR156i-3p_L-1R+1_1ss22TG	PDK_30s978251g001	3	9.745	1	20	182	201	GCUCACUUCUCUUUCUGUCA	GGAAGGAAAGGGAAGUGAGC	Cleavage	[locus_tag="PDK_30s978251L001"] [product="similar to predicted protein"] [strand="+"]	1
pda-miR396a-3p_L+1R-1	PDK_30s1195041g001	2	24.224	1	20	205	224	GUUCAAUAAAGCUGUGGGAA	UUUCCACAGCUUUCUUGAAC	Cleavage	[locus_tag="PDK_30s1195041L001"] [product="partial gene, no protein identified"] [strand="-"]	1
pda-miR396a-3p_L+1R-1	PDK_30s1043821g003	3	18.561	1	20	436	455	GUUCAAUAAAGCUGUGGGAA	AUCCCACAGCUUUAUUGUGC	Cleavage	[locus_tag="PDK_30s1043821L003"] [product="similar to predicted protein"] [strand="-"]	1
pda-miR396a-3p_L+1R-1	PDK_30s6550975g001	2.5	19.104	1	20	609	628	GUUCAAUAAAGCUGUGGGAA	UCCUUGCAGCUUUAUUGAAC	Cleavage	[locus_tag="PDK_30s6550975L001"] [product="replication protein a 70 kda dna-bindingsubunit"] [strand="-"]	1
pda-miR396a-3p_L+1R-1	PDK_30s676851g001	3	18.618	1	20	192	211	GUUCAAUAAAGCUGUGGGAA	UGCUCACAGCUUUAUUGCAC	Cleavage	[locus_tag="PDK_30s676851L001"] [product="aminopeptidase fxna"] [strand="+"]	1
pda-miR156i-3p_R-3_1ss6AT	PDK_30s1027821g004	1.5	15.745	1	20	757	776	UGCUCUCUUCUCUUUCUGUC	GACAGGAGGAGAAGGGAGCA	Cleavage	[locus_tag="PDK_30s1027821L004"] [product="similar to predicted protein"] [strand="+"]	1
pda-miR156i-3p_R-3_1ss6AT	PDK_30s674581g005	2.5	7.195	1	20	456	475	UGCUCUCUUCUCUUUCUGUC	GAUAGGAAGAGAAGAGAGUC	Cleavage	[locus_tag="PDK_30s674581L005"] [product="partial gene, no protein identified"] [strand="+"]	1
pda-miR156i-3p_R-3_1ss6AT	PDK_30s1068601g003	2	16.24	1	20	469	488	UGCUCUCUUCUCUUUCUGUC	GAUGGGAAGAGAGGAGAGCA	Cleavage	[locus_tag="PDK_30s1068601L003"] [product="similar to predicted protein"] [strand="+"]	1
pda-miR156i-3p_R-3_1ss6AT	PDK_30s918561g016	2.5	13.563	1	20	1560	1579	UGCUCUCUUCUCUUUCUGUC	GGCAGAAGGAGAGGAGGGUA	Cleavage	[locus_tag="PDK_30s918561L016"] [product="leucine rich repeat-containing"] [strand="+"]	1
pda-miR156i-3p_R-3_1ss6AT	PDK_30s790611g005	2.5	23.466	1	20	3	22	UGCUCUCUUCUCUUUCUGUC	GGCAGGAAGAGAGGAGGGCG	Cleavage	[locus_tag="PDK_30s790611L005"] [product="partial gene, no protein identified"] [strand="+"]	1
pda-miR156i-3p_R-3_1ss6AT	PDK_30s864371g001	2.5	21.121	1	20	1356	1375	UGCUCUCUUCUCUUUCUGUC	GGCAGAAGGAGAUGAGAGUA	Cleavage	[locus_tag="PDK_30s864371L001"] [product="nb-arc domain containing expressed"] [strand="+"]	1
pda-miR156i-3p_R-3_1ss6AT	PDK_30s741231g001	2	10.31	1	20	5	24	UGCUCUCUUCUCUUUCUGUC	GGGAGAAGGAGAAGAGAGCA	Cleavage	[locus_tag="PDK_30s741231L001"] [product="similar to predicted protein"] [strand="+"]	1
pda-miR156i-3p_R-3_1ss6AT	PDK_30s1037321g005	2.5	21.362	1	20	528	547	UGCUCUCUUCUCUUUCUGUC	CAAAGAAAGAGAAGAGGGCA	Cleavage	[locus_tag="PDK_30s1037321L005"] [product="similar to predicted protein"] [strand="-"]	1
pda-miR156i-3p_R-3_1ss6AT	PDK_30s998691g002	3	6.888	1	20	1708	1727	UGCUCUCUUCUCUUUCUGUC	GAUGGAAAGAGAGGAGAGGA	Cleavage	[locus_tag="PDK_30s998691L002"] [product="beta-hexosaminidase precursor"] [strand="-"]	1
pda-miR156i-3p_R-3_1ss6AT	PDK_30s1148111g001	3	17.052	1	20	6978	6997	UGCUCUCUUCUCUUUCUGUC	GGUAGAAGAAGAAGAGGGCA	Cleavage	[locus_tag="PDK_30s1148111L001"] [product="multidrug resistance protein"] [strand="+"]	1
pda-miR156i-3p_R-3_1ss6AT	PDK_30s817541g001	2.5	19.465	1	20	1131	1150	UGCUCUCUUCUCUUUCUGUC	GGAAGAAAGAGAGGAGGGCA	Cleavage	[locus_tag="PDK_30s817541L001"] [product="oxysterol-binding expressed"] [strand="+"]	1
pda-miR156i-3p_R-3_1ss6AT	PDK_30s660871g001	3	9.499	1	20	369	388	UGCUCUCUUCUCUUUCUGUC	GACAGAGAGAGGAGAGACCG	Cleavage	[locus_tag="PDK_30s660871L001"] [product="hypothetical protein OsJ_00980"] [strand="+"]	1
pda-miR156i-3p_R-3_1ss6AT	PDK_30s1014921g001	2.5	18.881	1	20	2125	2144	UGCUCUCUUCUCUUUCUGUC	GAGAGAAAGACAAGAGAGUA	Translation	[locus_tag="PDK_30s1014921L001"] [product="multidrug resistance protein"] [strand="+"]	1
pda-miR156i-3p_R-3_1ss6AT	PDK_30s1081361g001	3	15.943	1	20	451	470	UGCUCUCUUCUCUUUCUGUC	AGCAUGAAGAGAAGAGAGCA	Cleavage	[locus_tag="PDK_30s1081361L001"] [product="cytochrome p450"] [strand="+"]	1
pda-miR156i-3p_R-3_1ss6AT	PDK_30s720971g002	3	19.198	1	20	1103	1122	UGCUCUCUUCUCUUUCUGUC	GACAGCAAGAGAGGAUAGCA	Cleavage	[locus_tag="PDK_30s720971L002"] [product="partial gene, no protein identified"] [strand="+"]	1
pda-miR156i-3p_R-3_1ss6AT	PDK_30s1016851g001	3	16.652	1	20	939	958	UGCUCUCUUCUCUUUCUGUC	GGCAGGGAAGGAAGAGAGCA	Cleavage	[locus_tag="PDK_30s1016851L001"] [product="similar to predicted protein"] [strand="-"]	1
pda-3p-329752_16	PDK_30s665961g001	3	16.089	1	20	266	285	AAACAGGUCAGACAUAUAAA	UUUAUUAGUCUAACCUGUUU	Translation	[locus_tag="PDK_30s665961L001"] [product="hypothetical protein"] [strand="-"]	1
pda-3p-313542_18	PDK_30s1047211g001	3	18.128	1	22	781	802	UUUUGUUCGGCGGUCCAGUGCC	GCUGCUGGACUGCGGAACAGAA	Translation	[locus_tag="PDK_30s1047211L001"] [product="quinone oxidoreductase"] [strand="+"]	1
pda-3p-313542_18	PDK_30s722271g001	3	8.142	1	20	1035	1054	UUUUGUUCGGCGGUCCAGUG	CACUGAACUGCCGAAGAAAA	Cleavage	[locus_tag="PDK_30s722271L001"] [product="zinc finger"] [strand="-"]	1
pda-3p-313542_18	PDK_30s740851g002	3	21.347	1	20	73	92	UUUUGUUCGGCGGUCCAGUG	CACUGCAUCGCCGGGCAGAA	Cleavage	[locus_tag="PDK_30s740851L002"] [product="wrky transcription"] [strand="+"]	1
pda-5p-270991_22	PDK_30s719673g001	2.5	20.479	1	23	368	390	AUGUUUGAACACUUAAUCUAGCC	GGUUUGAUUAAAUGUUCAAAUAU	Cleavage	[locus_tag="PDK_30s719673L001"] [product="PREDICTED: hypothetical protein"] [strand="-"]	1
pda-5p-432618_11	PDK_30s855351g001	2.5	19.361	1	21	813	833	AUUGGAUUGUAAUUUGAUUGA	UCAAUCAGGUCACAAUCUAAU	Translation	[locus_tag="PDK_30s855351L001"] [product="dna binding"] [strand="+"]	1
pda-5p-266573_22	PDK_30s687161g003	3	15.354	1	21	2246	2266	UCCAAAGCGUCGGAAAAGGUU	AACCUUUUCUGAGGCCUUGGA	Translation	[locus_tag="PDK_30s687161L003"] [product="partial gene, no protein identified"] [strand="+"]	1
pda-5p-266573_22	PDK_30s879361g007	3	20.538	1	21	926	946	UCCAAAGCGUCGGAAAAGGUU	AACUCUUUCCGAGGUUUUGGA	Translation	[locus_tag="PDK_30s879361L007"] [product="partial gene, no protein identified"] [strand="-"]	1
pda-5p-266573_22	PDK_30s1186921g002	2.5	23.709	1	20	90	110	UCCAAAG-CGUCGGAAAAGGU	GCCUUUUCCGACGGUUUUGGA	Cleavage	[locus_tag="PDK_30s1186921L002"] [product="beta-hydroxyacyl-acp dehydratase"] [strand="+"]	1
pda-3p-149076_56	PDK_30s864371g001	3	21.191	1	23	1352	1374	GCUCUCUUCUCUUUCUGUCAACC	GGCUGGCAGAAGGAGAUGAGAGU	Cleavage	[locus_tag="PDK_30s864371L001"] [product="nb-arc domain containing expressed"] [strand="+"]	1
pda-3p-149076_56	PDK_30s1068601g003	2	16.24	1	22	466	487	GCUCUCUUCUCUUUCUGUCAAC	GAUGAUGGGAAGAGAGGAGAGC	Cleavage	[locus_tag="PDK_30s1068601L003"] [product="similar to predicted protein"] [strand="+"]	1
pda-3p-149076_56	PDK_30s674581g005	2.5	7.193	1	20	455	474	GCUCUCUUCUCUUUCUGUCA	AGAUAGGAAGAGAAGAGAGU	Cleavage	[locus_tag="PDK_30s674581L005"] [product="partial gene, no protein identified"] [strand="+"]	1
pda-3p-149076_56	PDK_30s790611g005	2	23.466	1	20	2	21	GCUCUCUUCUCUUUCUGUCA	UGGCAGGAAGAGAGGAGGGC	Cleavage	[locus_tag="PDK_30s790611L005"] [product="partial gene, no protein identified"] [strand="+"]	1
pda-3p-149076_56	PDK_30s1027821g004	2.5	16.651	1	20	756	775	GCUCUCUUCUCUUUCUGUCA	AGACAGGAGGAGAAGGGAGC	Cleavage	[locus_tag="PDK_30s1027821L004"] [product="similar to predicted protein"] [strand="+"]	1
pda-3p-149076_56	PDK_30s727661g002	3	24.44	1	21	20	40	GCUCUCUUCUCUUUCUGUCAA	UUGAGAGAGAGGGAGGAGAGU	Cleavage	[locus_tag="PDK_30s727661L002"] [product="similar to predicted protein"] [strand="+"]	1
pda-3p-149076_56	PDK_30s1044231g001	3	17.446	1	21	791	811	GCUCUCUUCUCUUUCUGUCAA	UUGACAGUGAGAGAAGAGGGG	Cleavage	[locus_tag="PDK_30s1044231L001"] [product="partial gene, no protein identified"] [strand="-"]	1
pda-3p-149076_56	PDK_30s680411g001	3	20.926	1	20	541	560	GCUCUCUUCUCUUUCUGUCA	UGGCGGAGAGAGAAGAGGGG	Cleavage	[locus_tag="PDK_30s680411L001"] [product="chromosome-associated kinesin"] [strand="-"]	1
pda-3p-149076_56	PDK_30s702811g002	3	16.615	1	21	629	649	GCUCUCUUCUCUUUCUGUCAA	UUGAGAGAAAGAGAAGAAAGU	Cleavage	[locus_tag="PDK_30s702811L002"] [product="bzip protein"] [strand="+"]	1
pda-3p-149076_56	PDK_30s1148111g001	3	17.114	1	20	6977	6996	GCUCUCUUCUCUUUCUGUCA	UGGUAGAAGAAGAAGAGGGC	Translation	[locus_tag="PDK_30s1148111L001"] [product="multidrug resistance protein"] [strand="+"]	1
pda-3p-373581_14	PDK_30s989431g001	2	19.592	1	22	415	436	AGGACGGGUAUCCGAUCACUGG	UCGGUGAUGGGAUAUCCGUCCU	Cleavage	[locus_tag="PDK_30s989431L001"] [product="mads-box protein agl17-like protein"] [strand="+"]	1
pda-3p-386334_13	PDK_30s667791g003	3	13.505	1	22	536	557	AGCCUAUGUGGACUAAAGGACA	UCUUCCUUAGUCCACAUAGGAU	Cleavage	[locus_tag="PDK_30s667791L003"] [product="dna methyltransferase 1-associated protein"] [strand="-"]	1
pda-3p-200031_35	PDK_30s967931g001	2.5	19.903	1	20	2524	2543	CCCGACUUGCAUCAACUGAG	UGCAGUUGAUGCAAGUUGGG	Cleavage	[locus_tag="PDK_30s967931L001"] [product="esp4 (enhanced silencing phenotype 4) binding"] [strand="-"]	1
pda-3p-339262_16	PDK_30s914621g001	3	23.609	1	20	76	95	GUGGAGUCCUACUCUGGCCC	GGGGCAGAGUGGGACUCUAG	Cleavage	[locus_tag="PDK_30s914621L001"] [product="cytochrome c oxidase polypeptide vc"] [strand="+"]	1
pda-3p-339262_16	PDK_30s790671g003	3	23.979	1	20	153	172	GUGGAGUCCUACUCUGGCCC	UGGUCAGGGCAGGACUCCAC	Translation	[locus_tag="PDK_30s790671L003"] [product="similar to predicted protein"] [strand="-"]	1
pda-3p-316346_17	PDK_30s679311g011	2	13.95	1	22	393	414	AAUACCACUUUCCCAUCUCUCU	AGGGAGAUUGGAGAGUGGUAUU	Cleavage	[locus_tag="PDK_30s679311L011"] [product="similar to predicted protein"] [strand="+"]	1
pda-3p-296980_19	PDK_30s667031g001	3	19.603	1	23	359	381	ACACUUUAGAAAGCAUCGUCGAA	UUUGGUGAUGCUUUAGAAAGUGU	Translation	[locus_tag="PDK_30s667031L001"] [product="partial gene, no protein identified"] [strand="+"]	1
pda-miR166a-5p_L+1R-1_1ss16CT	PDK_30s865121g003	3	11.392	1	21	39	59	GGGAAUGUUGUCUGGUUCGAG	CUCGACCCAGACAGCAUUCGC	Cleavage	[locus_tag="PDK_30s865121L003"] [product="partial gene, no protein identified"] [strand="-"]	1
pda-miR166a-5p_L+1R-1_1ss16CT	PDK_30s772301g005	3	20.71	1	21	186	206	GGGAAUGUUGUCUGGUUCGAG	CUCCAACUGGCCAACAUUCCC	Translation	[locus_tag="PDK_30s772301L005"] [product="grx_s14 Grx_S15.1- glutaredoxin subgroup ii"] [strand="+"]	1
pda-miR166a-5p_L+1R-1_1ss16CT	PDK_30s707665g004	3	19.597	1	21	1675	1695	GGGAAUGUUGUCUGGUUCGAG	UUUGAACCAGAUAUCAUUUCU	Cleavage	[locus_tag="PDK_30s707665L004"] [product="pentatricopeptide repeat-containing protein"] [strand="+"]	1
pda-miR166a-5p_L+1R-1_1ss16CT	PDK_30s708971g002	3	17.278	1	21	1204	1224	GGGAAUGUUGUCUGGUUCGAG	CUCAAGCCAGCCAACAUUCUC	Translation	[locus_tag="PDK_30s708971L002"] [product="u-box domain containing expressed"] [strand="+"]	1
pda-miR166a-5p_L+1R-1_1ss16CT	PDK_30s6550978g002	3	18.727	1	20	686	705	GGGAAUGUUGUCUGGUUCGA	UGGAAGCGGACAACAUUCUC	Cleavage	[locus_tag="PDK_30s6550978L002"] [product="calcium-dependent protein kinase"] [strand="-"]	1
pda-miR166a-5p_L+1R-1_1ss16CT	PDK_30s6550999g002	3	20.34	1	20	1826	1845	GGGAAUGUUGUCUGGUUCGA	UCAAACCAAGCAACAUUCUC	Cleavage	[locus_tag="PDK_30s6550999L002"] [product="lim domain"] [strand="+"]	1
pda-5p-110153_92	PDK_30s877611g002	3	19.489	1	21	524	544	UUGGAGAACUCUAGCCUAUGC	GCAUAGGCUAGAGCUCUCUCA	Cleavage	[locus_tag="PDK_30s877611L002"] [product="protein phosphatase"] [strand="-"]	1
pda-5p-110153_92	PDK_30s735491g001	3	23.376	1	20	304	323	UUGGAGAACUCUAGCCUAUG	UAUGGGCUUGAGCUCUCCAA	Cleavage	[locus_tag="PDK_30s735491L001"] [product="similar to predicted protein"] [strand="+"]	1
pda-3p-263356_23	PDK_30s672751g002	3	22.943	1	21	1567	1587	UCAGAUCAUGUUGCAGUUUCA	UGAAACUGUAGCAUCAUUUGA	Cleavage	[locus_tag="PDK_30s672751L002"] [product="partial gene, no protein identified"] [strand="-"]	1
pda-3p-263356_23	PDK_30s1118371g003	3	14.094	1	23	1404	1426	UCAGAUCAUGUUGCAGUUUCAUC	GAGGAAACUGCAACACCAUUUGA	Cleavage	[locus_tag="PDK_30s1118371L003"] [product="chromatin remodeling complex subunit"] [strand="+"]	1
pda-3p-263356_23	PDK_30s943301g013	3	21.643	1	20	1481	1500	UCAGAUCAUGUUGCAGUUUC	AAAGUUGCAACAGGAUCUGA	Cleavage	[locus_tag="PDK_30s943301L013"] [product="partial gene, no protein identified"] [strand="-"]	1
pda-miR172b-5p_1ss3AG	PDK_30s692321g001	2	21.563	1	20	4379	4398	GUGGCAUCAUCAAGAUUCAC	CUGAAUCUUGUUGAUGCCAC	Translation	[locus_tag="PDK_30s692321L001"] [product="partial gene, no protein identified"] [strand="-"]	1
pda-miR172b-5p_1ss3AG	PDK_30s864611g004	3	21.772	1	20	454	473	GUGGCAUCAUCAAGAUUCAC	UUGAAUCUUGAUGGUGGCAC	Cleavage	[locus_tag="PDK_30s864611L004"] [product="dna binding"] [strand="+"]	1
pda-miR172b-5p_1ss3AG	PDK_30s1194391g003	3	18.042	1	20	318	337	GUGGCAUCAUCAAGAUUCAC	UGGCAUCUUGAUGAUGCCAC	Cleavage	[locus_tag="PDK_30s1194391L003"] [product="rolled expressed"] [strand="-"]	1
pda-miR172b-5p_1ss3AG	PDK_30s987941g001	3	20.891	1	20	92	111	GUGGCAUCAUCAAGAUUCAC	GAGAAUCCUGAUGAUGCUGC	Cleavage	[locus_tag="PDK_30s987941L001"] [product="floral homeotic protein"] [strand="-"]	1
pda-miR172b-5p_1ss3AG	PDK_30s1158611g001	3	18.981	1	20	1522	1541	GUGGCAUCAUCAAGAUUCAC	GGGAAUAUUGAUGAUGCCGU	Cleavage	[locus_tag="PDK_30s1158611L001"] [product="similar to predicted protein"] [strand="+"]	1
pda-miR4376-p5_1ss2AT	PDK_30s740551g019	2.5	22.931	1	20	595	614	UUCGCAGGAGAGAUGAUGCU	AGCAUCAUUGCUCUUGCGAG	Translation	[locus_tag="PDK_30s740551L019"] [product="endoplasmic reticulum"] [strand="-"]	1
pda-miR4376-p5_1ss2AT	PDK_30s838351g003	3	17.079	1	20	12	31	UUCGCAGGAGAGAUGAUGCU	AGCAUUAUCUAUUCUGCGGG	Translation	[locus_tag="PDK_30s838351L003"] [product="type-b response regulator"] [strand="+"]	1
pda-miR4376-p5_1ss2AT	PDK_30s884771g003	3	17.211	1	20	256	274	UUCGCAGGAGAGAUGAUGCU	AGCAUCAUCUC-CUUGUGAA	Translation	[locus_tag="PDK_30s884771L003"] [product="calcium calmodulin-dependent protein kinase"] [strand="-"]	1
pda-5p-418800_12	PDK_30s1185661g002	2	11.634	1	20	2037	2056	GCUACUGUCAGAAGAUGAAU	AUUCAUCUUCAGACAGUGGU	Translation	[locus_tag="PDK_30s1185661L002"] [product="partial gene, no protein identified"] [strand="-"]	1
pda-5p-418800_12	PDK_30s1179721g001	3	14.73	1	24	386	409	GCUACUGUCAGAAGAUGAAUGCCU	AGUAAUUCAUCCUAUGACAGUAGA	Translation	[locus_tag="PDK_30s1179721L001"] [product="leucine-rich repeat containing"] [strand="-"]	1
pda-5p-418800_12	PDK_30s692911g001	3	14.813	1	20	2157	2176	GCUACUGUCAGAAGAUGAAU	AUUCAUCAUCUGAUAGAAGC	Cleavage	[locus_tag="PDK_30s692911L001"] [product="sister-chromatide cohesion protein"] [strand="-"]	1
pda-3p-261846_23	PDK_30s777581g001	3	20.623	1	20	593	612	AGUCGACUCUGAACUUUCAG	CUGACAGUUUAGAGUUGACA	Cleavage	[locus_tag="PDK_30s777581L001"] [product="wrky dna-binding protein"] [strand="+"]	1
pda-5p-223801_29	PDK_30s922621g001	3	20.439	1	22	545	566	ACCGGCCGGUACUGUACCGAUA	UAUCGGUACCUUAUCGGUCGGU	Cleavage	[locus_tag="PDK_30s922621L001"] [product="50s ribosomal protein l7"] [strand="+"]	1
pda-5p-360119_14	PDK_30s1100981g005	1	20.006	1	21	1204	1224	AGGAAGAGCUCCGCCUUGGUU	GAUCAAGGUGGAGCUCUUCCU	Cleavage	[locus_tag="PDK_30s1100981L005"] [product="partial gene, no protein identified"] [strand="+"]	1
pda-5p-441054_11	PDK_30s759711g003	3	8.546	1	22	927	948	AAAAAGGUACGGCAAGAAAGAA	UUCUUUCUUUCCUUUCCUUUUU	Translation	[locus_tag="PDK_30s759711L003"] [product="hydroxymethylglutaryl-CoA lyase"] [strand="-"]	1
pda-5p-441054_11	PDK_30s1187061g001	3	13.498	1	24	745	768	AAAAAGGUACGGCAAGAAAGAACC	GCUCCAUUCUUGUUGAACCUUUUU	Translation	[locus_tag="PDK_30s1187061L001"] [product="similar to predicted protein"] [strand="-"]	1
pda-5p-414524_12	PDK_30s1048951g002	2	9.572	1	21	231	251	AUGAAGUGAUUAAUGGGAUUG	CAAUACCAUUCAUCACUUCAU	Translation	[locus_tag="PDK_30s1048951L002"] [product="c2-h2 zinc finger protein"] [strand="-"]	1
pda-5p-414524_12	PDK_30s6550956g007	3	15.437	1	23	272	294	AUGAAGUGAUUAAUGGGAUUGCA	UGGAAUCCUAUCAAUUGUUUCAU	Cleavage	[locus_tag="PDK_30s6550956L007"] [product="periplasmic beta-glucosidase"] [strand="-"]	1
pda-5p-414524_12	PDK_30s681301g005	3	15.865	1	22	821	842	AUGAAGUGAUUAAUGGGAUUGC	GUAAUCCCAAGAAUCACUUCAA	Cleavage	[locus_tag="PDK_30s681301L005"] [product="partial gene, no protein identified"] [strand="-"]	1
pda-5p-414524_12	PDK_30s875331g002	2.5	16.427	1	23	193	215	AUGAAGUGAUUAAUGGGAUUGCA	UAUAAUCUCUUGAAUCACUUCAU	Cleavage	[locus_tag="PDK_30s875331L002"] [product="d-type cyclin"] [strand="-"]	1
pda-5p-414524_12	PDK_30s1131901g001	3	9.576	1	21	156	176	AUGAAGUGAUUAAUGGGAUUG	CCAUCCAAUUGAUCAUUUCAU	Cleavage	[locus_tag="PDK_30s1131901L001"] [product="partial gene, no protein identified"] [strand="+"]	1
pda-5p-414524_12	PDK_30s876401g001	3	13.634	1	20	322	341	AUGAAGUGAUUAAUGGGAUU	AAUCCCAUCAAUCUUUUCAU	Cleavage	[locus_tag="PDK_30s876401L001"] [product="trypsin-like serine and cysteine proteases"] [strand="-"]	1
pda-3p-217326_31-R4	PDK_30s65509566g001	3	21.261	1	24	823	846	UUCGAACGAAACAGGAGACUCGCC	GGUGAAUGCCCUGUUUCGUUCGAA	Cleavage	[locus_tag="PDK_30s65509566L001"] [product="partial gene, no protein identified"] [strand="+"]	1
pda-3p-217326_31-R4	PDK_30s733631g004	3	24.432	1	24	234	257	UUCGAACGAAACAGGAGACUCGCC	GGCCGCUCCUCUGUUUCGUUCGAA	Cleavage	[locus_tag="PDK_30s733631L004"] [product="partial gene, no protein identified"] [strand="-"]	1
pda-3p-217326_31	PDK_30s65509566g001	3	21.261	1	24	823	846	UUCGAACGAAACAGGAGACUCGCC	GGUGAAUGCCCUGUUUCGUUCGAA	Cleavage	[locus_tag="PDK_30s65509566L001"] [product="partial gene, no protein identified"] [strand="+"]	1
pda-3p-217326_31	PDK_30s733631g004	3	24.432	1	24	234	257	UUCGAACGAAACAGGAGACUCGCC	GGCCGCUCCUCUGUUUCGUUCGAA	Cleavage	[locus_tag="PDK_30s733631L004"] [product="partial gene, no protein identified"] [strand="-"]	1
pda-miR167a	PDK_30s1201081g001	3	14.943	1	21	493	513	UGAAGCUGCCAGCAUGAUCUA	UAUAUUAUCUUGGCAGCUUCA	Cleavage	[locus_tag="PDK_30s1201081L001"] [product="f-box-containing protein 2"] [strand="+"]	1
pda-miR167a	PDK_30s886891g002	3	18.061	1	20	983	1002	UGAAGCUGCCAGCAUGAUCU	AGAUCAUCUUGGUAGCUUUG	Cleavage	[locus_tag="PDK_30s886891L002"] [product="retrotransposon ty3-gypsy subclass"] [strand="-"]	1
pda-miR167a	PDK_30s868111g005	3	17.131	1	20	2699	2718	UGAAGCUGCCAGCAUGAUCU	AGAUCAUGUCGGGAGCUUCG	Translation	[locus_tag="PDK_30s868111L005"] [product="similar to predicted protein"] [strand="-"]	1
pda-miR167a	PDK_30s667851g002	3	24.996	1	20	339	358	UGAAGCUGCCAGCAUGAUCU	AGAGGAUGCUGUCAGCUUCA	Translation	[locus_tag="PDK_30s667851L002"] [product="nad h:quinone oxidoreductase"] [strand="-"]	1
pda-miR167a	PDK_30s885901g004	3	19.313	1	20	434	453	UGAAGCUGCCAGCAUGAUCU	AGAUCAUCCGUGCAGCUUCA	Translation	[locus_tag="PDK_30s885901L004"] [product="partial gene, no protein identified"] [strand="+"]	1
pda-miR390a	PDK_30s697331g001	2.5	18.634	1	21	403	423	AAGCUCAGGAGGGAUAGCGCC	GGUCCUAUUCCUUCUGAGCUU	Cleavage	[locus_tag="PDK_30s697331L001"] [product="leucine-rich repeat receptor-like proteinkinase"] [strand="+"]	1
pda-3p-231836_28	PDK_30s1146061g001	2.5	17.354	1	22	789	810	CAGAAGGCUUCUGUUCGGCACC	GCUGCUGAACAUAAGCCUUCUU	Translation	[locus_tag="PDK_30s1146061L001"] [product="tga1 dna binding calmodulin bindingtranscription factor"] [strand="-"]	1
pda-3p-231836_28	PDK_30s1160831g002	3	18.075	1	21	991	1011	CAGAAGGCUUCUGUUCGGCAC	GUGCUGAUCAGAAGGCUUCUG	Cleavage	[locus_tag="PDK_30s1160831L002"] [product="partial gene, no protein identified"] [strand="-"]	1
pda-3p-231836_28	PDK_30s793121g002	3	12.144	1	22	651	672	CAGAAGGCUUCUGUUCGGCACC	GCUGUUGAACAUAAGCCUUCUU	Translation	[locus_tag="PDK_30s793121L002"] [product="transcription factor hbp-1b"] [strand="-"]	1
pda-5p-266719_22	PDK_30s696051g002	3	24.944	1	24	375	398	ACGUUGGUUUUAACUUGGCUCACC	GAUGAGCCAAGUUCAGACCAACAU	Translation	[locus_tag="PDK_30s696051L002"] [product="partial gene, no protein identified"] [strand="-"]	1
pda-5p-266719_22	PDK_30s718541g001	3	11.037	1	22	156	177	ACGUUGGUUUUAACUUGGCUCA	UGAGCCAAGUUAGCACCAAAGU	Translation	[locus_tag="PDK_30s718541L001"] [product="partial gene, no protein identified"] [strand="-"]	1
pda-5p-266719_22	PDK_30s6550960g002	2.5	17.864	1	20	229	248	ACGUUGGUUUUAACUUGGCU	AGCCAAGUUAAAGUCACCGU	Cleavage	[locus_tag="PDK_30s6550960L002"] [product="glucan endo-1,4-beta-glucosidase"] [strand="+"]	1
pda-3p-241095_26	PDK_30s959931g001	2.5	22.05	1	23	690	712	CGAGUGUUCCUAUGUUUAUCUGU	AGGGGUAAACAUGGGAGUACUUG	Cleavage	[locus_tag="PDK_30s959931L001"] [product="partial gene, no protein identified"] [strand="-"]	1
pda-3p-241095_26	PDK_30s974151g011	3	12.356	1	23	1105	1127	CGAGUGUUCCUAUGUUUAUCUGU	AGAGAUGAACAUAGAAGCACUCC	Translation	[locus_tag="PDK_30s974151L011"] [product="partial gene, no protein identified"] [strand="+"]	1
pda-3p-241095_26	PDK_30s912881g001	3	12.758	1	20	1320	1339	CGAGUGUUCCUAUGUUUAUC	AAUAAACAUGGGAACACUUU	Cleavage	[locus_tag="PDK_30s912881L001"] [product="similar to predicted protein"] [strand="-"]	1
pda-miR168c-3p	PDK_30s967931g001	3	19.903	1	20	2524	2543	CCCGCCUUGCAUCAACUGAA	UGCAGUUGAUGCAAGUUGGG	Cleavage	[locus_tag="PDK_30s967931L001"] [product="esp4 (enhanced silencing phenotype 4) binding"] [strand="-"]	1
pda-miR168a-3p_R-1_1ss3TC	PDK_30s967931g001	3	19.903	1	20	2524	2543	CCCGCCUUGCAUCAACUGAA	UGCAGUUGAUGCAAGUUGGG	Cleavage	[locus_tag="PDK_30s967931L001"] [product="esp4 (enhanced silencing phenotype 4) binding"] [strand="-"]	1
pda-miR167-3p_2ss8GC20CT	PDK_30s1008861g005	3	24.201	1	21	124	144	AGAUCAUCUGGCAGUUUCAUC	GGUGAGGCUGCUAGAUGAUCC	Cleavage	[locus_tag="PDK_30s1008861L005"] [product="growth-regulating factor 1"] [strand="-"]	1
pda-miR167-3p_2ss8GC20CT	PDK_30s799181g001	3	18.711	1	21	501	521	AGAUCAUCUGGCAGUUUCAUC	GAUGAAAUUUCCGUAUGAUCU	Cleavage	[locus_tag="PDK_30s799181L001"] [product="partial gene, no protein identified"] [strand="-"]	1
pda-miR167-3p_2ss8GC20CT	PDK_30s817251g007	3	20.786	1	20	469	488	AGAUCAUCUGGCAGUUUCAU	AUGAAUCUGUCAGAUGAUGU	Cleavage	[locus_tag="PDK_30s817251L007"] [product="calcineurin b-like protein 3"] [strand="+"]	1
pda-miR167-3p_2ss8GC20CT	PDK_30s973611g009	3	17.873	1	20	2995	3014	AGAUCAUCUGGCAGUUUCAU	AUGAAAUUGCUCGGUGGUCU	Translation	[locus_tag="PDK_30s973611L009"] [product="phd-finger family expressed"] [strand="-"]	1
pda-miR167-3p_2ss8GC20CT	PDK_30s846091g008	3	15.099	1	20	831	850	AGAUCAUCUGGCAGUUUCAU	UUGCAAAUGCCAGAUGAUCU	Cleavage	[locus_tag="PDK_30s846091L008"] [product="folylpolyglutamate synthase"] [strand="-"]	1
pda-5p-172763_44	PDK_30s1122781g001	3	14.669	1	20	106	125	AUUCUAAGCAUGUUCGGGUU	AACCUGAAUAAGUUUGGAAU	Translation	[locus_tag="PDK_30s1122781L001"] [product="acetolactate synthase small subunit"] [strand="+"]	1
pda-5p-172763_44	PDK_30s805061g001	3	17.782	1	20	238	257	AUUCUAAGCAUGUUCGGGUU	AACCCCAACAAGUUUGGAAU	Translation	[locus_tag="PDK_30s805061L001"] [product="partial gene, no protein identified"] [strand="+"]	1
pda-miR164_1ss21GC	PDK_30s747721g001	3	21.067	1	21	27	47	UGGAGAAGCAGGGCACGUGCC	GGCAUUUGCUCUGUUUCUUCA	Cleavage	[locus_tag="PDK_30s747721L001"] [product="beta-mannosidase 4"] [strand="+"]	1
pda-miR164_1ss21GC	PDK_30s1141931g003	2.5	22.196	1	20	642	661	UGGAGAAGCAGGGCACGUGC	UCACGUGACCUGCUUCUCCG	Cleavage	[locus_tag="PDK_30s1141931L003"] [product="nac domain ipr003441"] [strand="+"]	1
pda-miR164_1ss21GC	PDK_30s1198591g001	2	16.67	1	20	633	652	UGGAGAAGCAGGGCACGUGC	GCAAGUUCCCUGCUUCUCCA	Cleavage	[locus_tag="PDK_30s1198591L001"] [product="nac domain ipr003441"] [strand="+"]	1
pda-miR164_1ss21GC	PDK_30s658491g001	3	16.161	1	20	1256	1275	UGGAGAAGCAGGGCACGUGC	CCACGAGCCUUGCUUCUCCG	Cleavage	[locus_tag="PDK_30s658491L001"] [product="partial gene, no protein identified"] [strand="-"]	1
pda-miR164_1ss21GC	PDK_30s1181011g001	3	14.097	1	20	1316	1335	UGGAGAAGCAGGGCACGUGC	CCACGAGCCCUGCUUCUCUG	Cleavage	[locus_tag="PDK_30s1181011L001"] [product="partial gene, no protein identified"] [strand="-"]	1
pda-miR164_1ss21GC	PDK_30s830581g001	3	19.233	1	20	174	193	UGGAGAAGCAGGGCACGUGC	GCGCUUGUCCCGCUUCUCCA	Translation	[locus_tag="PDK_30s830581L001"] [product="partial gene, no protein identified"] [strand="-"]	1
pda-5p-136470_65	PDK_30s1075621g001	2.5	23.302	1	23	159	181	AAGAAAGCGUCGGCCAUGUAUGG	CUCUCCAUGGCCGAGGCUUUUUU	Translation	[locus_tag="PDK_30s1075621L001"] [product="glycerol 3-phosphate permease"] [strand="+"]	1
pda-3p-89170_129	PDK_30s886321g001	3	18.646	1	24	1260	1283	AAGUAGUUUGUGGGAGAGUUGGUA	UCUCGACUCUCUCACAAACUGUUG	Cleavage	[locus_tag="PDK_30s886321L001"] [product="protein kinase xa21"] [strand="+"]	1
pda-3p-89170_129	PDK_30s728171g001	3	11.643	1	22	1268	1289	AAGUAGUUUGUGGGAGAGUUGG	CAAACUCUUUCACAGGUUAUUU	Cleavage	[locus_tag="PDK_30s728171L001"] [product="partial gene, no protein identified"] [strand="+"]	1
pda-3p-258784_23	PDK_30s688311g002	3	11.668	1	23	1244	1266	AAGAUGGAUGAUAUGGCAGCUAU	AUAUCAGCCUUAUCAUCCAUCUU	Cleavage	[locus_tag="PDK_30s688311L002"] [product="similar to predicted protein"] [strand="-"]	1
pda-3p-258784_23	PDK_30s905071g001	3	11.711	1	24	507	530	AAGAUGGAUGAUAUGGCAGCUAUC	GGUGUCUUCCAUAUAAUCCAUCUU	Translation	[locus_tag="PDK_30s905071L001"] [product="selenium-binding protein"] [strand="-"]	1
pda-3p-258784_23	PDK_30s682591g004	2.5	13.395	1	24	171	193	AAGAUGGAUGAUAUGGCAGCUAUC	GGAAGCUGCCAUA-CAUUCAUCUU	Translation	[locus_tag="PDK_30s682591L004"] [product="partial gene, no protein identified"] [strand="+"]	1
pda-3p-258784_23	PDK_30s854521g001	2.5	18.324	1	20	764	783	AAGAUGGAUGAUAUGGCAGC	GCUGCCAUGUCACUCAUUUU	Cleavage	[locus_tag="PDK_30s854521L001"] [product="pentatricopeptide repeat-containing"] [strand="-"]	1
pda-3p-89170_129-R7	PDK_30s886321g001	3	18.646	1	24	1260	1283	AAGUAGUUUGUGGGAGAGUUGGUA	UCUCGACUCUCUCACAAACUGUUG	Cleavage	[locus_tag="PDK_30s886321L001"] [product="protein kinase xa21"] [strand="+"]	1
pda-3p-89170_129-R7	PDK_30s728171g001	3	11.643	1	22	1268	1289	AAGUAGUUUGUGGGAGAGUUGG	CAAACUCUUUCACAGGUUAUUU	Cleavage	[locus_tag="PDK_30s728171L001"] [product="partial gene, no protein identified"] [strand="+"]	1
pda-3p-313473_18	PDK_30s980161g001	3	14.393	1	19	4260	4279	AAAUCGACGAUA-CAACUAA	UUGGUUGAUAUCGUUGAUUU	Cleavage	[locus_tag="PDK_30s980161L001"] [product="vacuolar protein sorting 13c"] [strand="-"]	1
pda-miR169c_R-1_2ss14CT15TC	PDK_30s6550962g001	2.5	19.996	1	20	1632	1651	UAGCCAAGGAUGAUCUGCCU	AGGGAGGUCAUCUUUGGCUG	Cleavage	[locus_tag="PDK_30s6550962L001"] [product="partial gene, no protein identified"] [strand="+"]	1
pda-miR398c	PDK_30s657581g001	3	20.927	1	20	471	490	UGUGUUCUCAGGUCGCCCCU	AGGGGCGACUGGAGAACUCA	Translation	[locus_tag="PDK_30s657581L001"] [product="mads box"] [strand="-"]	1
pda-miR398c	PDK_30s760501g002	3	16.793	1	20	102	121	UGUGUUCUCAGGUCGCCCCU	AGGGGAGACUUGAGAAUAUG	Cleavage	[locus_tag="PDK_30s760501L002"] [product="similar to predicted protein"] [strand="-"]	1
pda-miR398c	PDK_30s969551g002	3	22.458	1	20	544	563	UGUGUUCUCAGGUCGCCCCU	AGGGGGGACUGGAGGACACA	Translation	[locus_tag="PDK_30s969551L002"] [product="transparent testa 1"] [strand="+"]	1
pda-5p-224392_29	PDK_30s1119051g002	1	18.654	1	21	871	891	CAGUUCCUCCAAAGCUUUGUA	UACAGAGCUUUGGAGGAAUUG	Cleavage	[locus_tag="PDK_30s1119051L002"] [product="kinesin-related protein"] [strand="+"]	1
pda-5p-224392_29	PDK_30s740551g011	3	15.617	1	21	496	516	CAGUUCCUCCAAAGCUUUGUA	UACAGAACUUUGGAGGAAUUA	Cleavage	[locus_tag="PDK_30s740551L011"] [product="partial gene, no protein identified"] [strand="+"]	1
pda-5p-224392_29	PDK_30s904701g005	2.5	13.184	1	20	326	345	CAGUUCCUCCAAAGCUUUGU	AUAAAUUUUUGGAGGAGCUG	Cleavage	[locus_tag="PDK_30s904701L005"] [product="similar to predicted protein"] [strand="+"]	1
pda-5p-224392_29	PDK_30s1088671g002	3	11.123	1	20	245	264	CAGUUCCUCCAAAGCUUUGU	AUAAAUUUUUGGAGGAGUUG	Cleavage	[locus_tag="PDK_30s1088671L002"] [product="similar to predicted protein"] [strand="+"]	1
pda-5p-295079_19	PDK_30s958981g001	2.5	24.449	1	22	16	37	AGGAGCUUUGGAGUGAGCCGGC	GCCGGCCCACUUCAGAGCUCUU	Cleavage	[locus_tag="PDK_30s958981L001"] [product="gpi transamidase component family proteingaa1-like family protein"] [strand="-"]	1
pda-5p-295079_19	PDK_30s873781g003	3	24.468	1	22	318	339	AGGAGCUUUGGAGUGAGCCGGC	GCUGGCUCGCUCUCAGGCUCCU	Translation	[locus_tag="PDK_30s873781L003"] [product="cytochrome p450"] [strand="-"]	1
pda-5p-295079_19	PDK_30s831521g001	3	10.227	1	21	129	149	AGGAGCUUUGGAGUGAGCCGG	UCUGCUCCCUCCAAAGCUCCC	Cleavage	[locus_tag="PDK_30s831521L001"] [product="partial gene, no protein identified"] [strand="-"]	1
pda-miR395_R-1_2ss14AG20TG	PDK_30s986061g002	3	20.774	1	20	128	147	CUGAAGUGUUUGGGGGAACG	AGUUCCUCCAAGCACUUCAU	Cleavage	[locus_tag="PDK_30s986061L002"] [product="atp sulfurylase"] [strand="+"]	1
pda-miR395_R-1_2ss14AG20TG	PDK_30s1028201g011	3	19.246	1	20	1459	1478	CUGAAGUGUUUGGGGGAACG	GGUUCCACCAAACACUUCAA	Cleavage	[locus_tag="PDK_30s1028201L011"] [product="fkbp-rapamycin associated"] [strand="-"]	1
pda-miR395_R-1_2ss14AG20TG	PDK_30s65509220g001	3	14.963	1	20	1007	1026	CUGAAGUGUUUGGGGGAACG	CGUUCCCCGAAGCACUUCGU	Cleavage	[locus_tag="PDK_30s65509220L001"] [product="similar to predicted protein"] [strand="+"]	1
pda-miR395_R-1_2ss14AG20TG	PDK_30s973471g001	3	13.126	1	20	117	136	CUGAAGUGUUUGGGGGAACG	CGAUCCCCUAAACACUUCGU	Cleavage	[locus_tag="PDK_30s973471L001"] [product="receptor-kinase isolog"] [strand="+"]	1
pda-miR395_R-1_2ss14AG20TG	PDK_30s1207681g001	3	23.615	1	20	229	248	CUGAAGUGUUUGGGGGAACG	CCUUCUCCCAAGCACUUUGG	Cleavage	[locus_tag="PDK_30s1207681L001"] [product="serine threonine-protein kinase haspin"] [strand="+"]	1
pda-miR395_R-1_2ss14AG20TG	PDK_30s65509724g002	3	18.483	1	20	2301	2320	CUGAAGUGUUUGGGGGAACG	CGUGCCUCCAAAAAUUUCAG	Cleavage	[locus_tag="PDK_30s65509724L002"] [product="tzp dna binding nucleic acid binding zinc ionbinding"] [strand="+"]	1
pda-miR171h_L-1R+1_1ss2TC	PDK_30s983281g001	2.5	22.379	1	20	370	389	CGAGCCGAACCAAUAUCACU	UGUGAUUUUGGUUUGGCUCG	Cleavage	[locus_tag="PDK_30s983281L001"] [product="mpk14 - mapk"] [strand="+"]	1
pda-miR171h_L-1R+1_1ss2TC	PDK_30s973481g001	3	22.124	1	20	361	380	CGAGCCGAACCAAUAUCACU	AAUGAUAUUGGUUGGGUUCG	Cleavage	[locus_tag="PDK_30s973481L001"] [product="partial gene, no protein identified"] [strand="+"]	1
pda-miR319_L+1R+1	PDK_30s1094971g006	1.5	17.68	1	20	2073	2092	UUUGGACUGAAGGGAGCUCC	GGAGCUCCCUUCAGUACAAA	Cleavage	[locus_tag="PDK_30s1094971L006"] [product="partial gene, no protein identified"] [strand="-"]	1
pda-miR319_L+1R+1	PDK_30s679071g001	2.5	24.65	1	21	1228	1248	UUUGGACUGAAGGGAGCUCCU	AGGAGUUUCUUUCAGUCCGAG	Cleavage	[locus_tag="PDK_30s679071L001"] [product="partial gene, no protein identified"] [strand="-"]	1
pda-miR319_L+1R+1	PDK_30s835621g004	2.5	19.907	1	21	1062	1082	UUUGGACUGAAGGGAGCUCCU	AGGGGCUUGCUUCAGUCCAAG	Cleavage	[locus_tag="PDK_30s835621L004"] [product="similar to predicted protein"] [strand="+"]	1
pda-miR319_L+1R+1	PDK_30s1165641g012	2.5	18.954	1	20	963	982	UUUGGACUGAAGGGAGCUCC	GGAGCUCCCUUCACUCCAAU	Cleavage	[locus_tag="PDK_30s1165641L012"] [product="partial gene, no protein identified"] [strand="+"]	1
pda-miR319_L+1R+1	PDK_30s734181g004	3	20.365	1	21	374	394	UUUGGACUGAAGGGAGCUCCU	AAGAGCUCCAUUCGGUCCAAG	Cleavage	[locus_tag="PDK_30s734181L004"] [product="hypothetical protein"] [strand="+"]	1
pda-miR319_L+1R+1	PDK_30s971331g001	3	13.07	1	21	233	253	UUUGGACUGAAGGGAGCUCCU	GGAAGCUCUCUUCAUUCCAAA	Cleavage	[locus_tag="PDK_30s971331L001"] [product="partial gene, no protein identified"] [strand="-"]	1
pda-miR160b_2ss1CT15TA	PDK_30s951701g002	1	18.694	1	21	798	818	UGCCUGGCUCCCUGAAUGCCA	UGGCAUGCAGGGAGCCAGGCA	Cleavage	[locus_tag="PDK_30s951701L002"] [product="auxin response"] [strand="+"]	1
pda-miR160b_2ss1CT15TA	PDK_30s718951g001	1	20.128	1	20	1378	1397	UGCCUGGCUCCCUGAAUGCC	GGCAUACAGGGAGCCAGGCA	Cleavage	[locus_tag="PDK_30s718951L001"] [product="similar to predicted protein"] [strand="+"]	1
pda-miR160b_2ss1CT15TA	PDK_30s811331g001	2.5	14.435	1	21	778	797	UGCCUGGCUCCCUGAAUGCCA	UGGCAUUCAGGG-GUCAGGCA	Translation	[locus_tag="PDK_30s811331L001"] [product="zinc finger (c2h2 type) family protein"] [strand="+"]	1
pda-miR160b_2ss1CT15TA	PDK_30s1141931g002	3	17.611	1	20	1395	1414	UGCCUGGCUCCCUGAAUGCC	GGUAUUCAGCGAGCCAGUCA	Translation	[locus_tag="PDK_30s1141931L002"] [product="cytochrome p450"] [strand="-"]	1
pda-5p-283724_20-R1	PDK_30s704661g006	3	18.507	1	21	787	807	UCUGGAGACCCAUAGCCCAUG	CAUGGGCUAUGUGUGUCCGGA	Translation	[locus_tag="PDK_30s704661L006"] [product="partial gene, no protein identified"] [strand="+"]	1
pda-5p-283724_20	PDK_30s704661g006	3	18.507	1	21	787	807	UCUGGAGACCCAUAGCCCAUG	CAUGGGCUAUGUGUGUCCGGA	Translation	[locus_tag="PDK_30s704661L006"] [product="partial gene, no protein identified"] [strand="+"]	1
pda-miR529e_1ss21CG	PDK_30s756061g001	1.5	16.372	1	21	669	689	AGAAGAGAGAGAGUACAGCCG	CAGCUGUGCUCUCUCUCUUCU	Cleavage	[locus_tag="PDK_30s756061L001"] [product="partial gene, no protein identified"] [strand="+"]	1
pda-miR529e_1ss21CG	PDK_30s704101g001	2.5	17.648	1	21	212	232	AGAAGAGAGAGAGUACAGCCG	CAGCUGUGCUCUCUCUCUUCG	Cleavage	[locus_tag="PDK_30s704101L001"] [product="partial gene, no protein identified"] [strand="-"]	1
pda-miR529e_1ss21CG	PDK_30s772931g003	2	13.697	1	21	441	461	AGAAGAGAGAGAGUACAGCCG	UGAUUGUGCUCUCUCUCUUCU	Cleavage	[locus_tag="PDK_30s772931L003"] [product="partial gene, no protein identified"] [strand="+"]	1
pda-miR529e_1ss21CG	PDK_30s774191g002	2.5	20.457	1	21	1241	1261	AGAAGAGAGAGAGUACAGCCG	UGGUUGAACUCUCUCUCUUCA	Cleavage	[locus_tag="PDK_30s774191L002"] [product="abscisic acid responsive elements-bindingfactor"] [strand="-"]	1
pda-miR529e_1ss21CG	PDK_30s789261g002	2.5	22.684	1	21	244	263	AGAAGAGAGAGAGUACAGCCG	CGGC-GUGCUCUCUCUCUUCU	Cleavage	[locus_tag="PDK_30s789261L002"] [product="partial gene, no protein identified"] [strand="+"]	1
pda-miR529e_1ss21CG	PDK_30s882821g001	2.5	16.64	1	21	1361	1380	AGAAGAGAGAGAGUACAGCCG	CGGC-GUGCUCUCUCUCUUCU	Cleavage	[locus_tag="PDK_30s882821L001"] [product="partial gene, no protein identified"] [strand="+"]	1
pda-miR529e_1ss21CG	PDK_30s1025931g001	3	21.478	1	20	588	607	AGAAGAGAGAGAGUACAGCC	GGCCGUGCUCUUCCUCUUCU	Cleavage	[locus_tag="PDK_30s1025931L001"] [product="partial gene, no protein identified"] [strand="+"]	1
pda-miR529e_1ss21CG	PDK_30s905141g003	3	17.681	1	20	1918	1937	AGAAGAGAGAGAGUACAGCC	GGCUGAACUCGCUUUCUUUU	Translation	[locus_tag="PDK_30s905141L003"] [product="partial gene, no protein identified"] [strand="-"]	1
pda-5p-195988_36	PDK_30s988131g003	3	14.555	1	23	2919	2941	AAGUGAAGUCGGCAAACUCUUUG	CUAAGGGUUUCUCGAUUUUACUU	Cleavage	[locus_tag="PDK_30s988131L003"] [product="partial gene, no protein identified"] [strand="-"]	1
pda-5p-350550_15	PDK_30s1082651g001	3	22.941	1	23	1181	1203	UCAUGACAAUGCAAUGUUCGGAA	UAUCGAGCUUUGCAUGGUCAUGG	Cleavage	[locus_tag="PDK_30s1082651L001"] [product="hexose transporter"] [strand="+"]	1
pda-5p-350550_15	PDK_30s1153001g002	3	19.287	1	20	522	541	UCAUGACAAUGCAAUGUUCG	UGGACAUGGCAUGGUCAUGA	Cleavage	[locus_tag="PDK_30s1153001L002"] [product="partial gene, no protein identified"] [strand="+"]	1
pda-5p-228808_28	PDK_30s893251g001	2.5	16.978	1	22	474	495	AGGAUGUUUGACAUGGUCCUUG	CAAAGCCCAUGUCAAACAUUCU	Cleavage	[locus_tag="PDK_30s893251L001"] [product="similar to predicted protein"] [strand="-"]	1
pda-5p-228808_28	PDK_30s715601g001	3	11.2	1	23	760	782	AGGAUGUUUGACAUGGUCCUUGC	GUAAGGACCAAGACAAGCAUUCU	Translation	[locus_tag="PDK_30s715601L001"] [product="trna-splicing"] [strand="-"]	1
pda-miR394a-p3	PDK_30s891771g002	2	15.641	1	21	66	86	AGCUCUGUUGGCUUCUCUUUG	UAAAGAGAAGCCAGCAGAACU	Cleavage	[locus_tag="PDK_30s891771L002"] [product="partial gene, no protein identified"] [strand="+"]	1
pda-miR394a-p3	PDK_30s782101g002	2.5	22.961	1	20	1328	1347	AGCUCUGUUGGCUUCUCUUU	UUAGAGAAGCCAACGGAGCU	Cleavage	[locus_tag="PDK_30s782101L002"] [product="partial gene, no protein identified"] [strand="+"]	1
pda-miR394a-p3	PDK_30s1188281g001	2.5	15.802	1	20	1154	1173	AGCUCUGUUGGCUUCUCUUU	UUAGAGAAGCCAACAGGGCU	Cleavage	[locus_tag="PDK_30s1188281L001"] [product="partial gene, no protein identified"] [strand="+"]	1
pda-miR394a-p3	PDK_30s703981g001	3	9.676	1	20	512	531	AGCUCUGUUGGCUUCUCUUU	AAAGAGAAGCCAAUAGAGAG	Cleavage	[locus_tag="PDK_30s703981L001"] [product="partial gene, no protein identified"] [strand="+"]	1
pda-miR394a-p3	PDK_30s807021g003	3	19.394	1	20	4028	4047	AGCUCUGUUGGCUUCUCUUU	CAAGAGAAGCCAUCAGAGCA	Cleavage	[locus_tag="PDK_30s807021L003"] [product="aldehyde oxidase"] [strand="+"]	1
pda-miR394a-p3	PDK_30s1203091g005	3	24.09	1	20	101	120	AGCUCUGUUGGCUUCUCUUU	AGAGAGGAGCUAACAGAGAU	Cleavage	[locus_tag="PDK_30s1203091L005"] [product="partial gene, no protein identified"] [strand="+"]	1
pda-miR394a-p3	PDK_30s763681g007	3	16.621	1	20	713	732	AGCUCUGUUGGCUUCUCUUU	AAAGGGAAGUCAACGAAGCU	Cleavage	[locus_tag="PDK_30s763681L007"] [product="retrotransposon unclassified"] [strand="+"]	1
pda-miR394a-p3	PDK_30s1146771g001	2.5	19.349	1	20	269	288	AGCUCUGUUGGCUUCUCUUU	AGAAGGAAGUCAACAGAGCU	Cleavage	[locus_tag="PDK_30s1146771L001"] [product="argonaute protein group"] [strand="+"]	1
pda-miR394a-p3	PDK_30s1028201g012	3	16.739	1	21	1118	1138	AGCUCUGUUGGCUUCUCUUUG	CAAAGGCAAGCCCGCAGAGCU	Translation	[locus_tag="PDK_30s1028201L012"] [product="target of rapamycin kinase"] [strand="-"]	1
pda-miR394a-p3	PDK_30s1020241g002	3	19.884	1	20	1289	1308	AGCUCUGUUGGCUUCUCUUU	CAAGAGAAGCCAUCAGAGCA	Cleavage	[locus_tag="PDK_30s1020241L002"] [product="aldehyde oxidase"] [strand="+"]	1
pda-miR394a-p3	PDK_30s671041g002	3	17.246	1	21	828	848	AGCUCUGUUGGCUUCUCUUUG	UAGAGAGAAGCAAAGAGAGCU	Translation	[locus_tag="PDK_30s671041L002"] [product="partial gene, no protein identified"] [strand="+"]	1
pda-miR394a-p3	PDK_30s717651g002	3	18.116	1	20	391	410	AGCUCUGUUGGCUUCUCUUU	UAAGAGAAGUGGACAGAGCU	Translation	[locus_tag="PDK_30s717651L002"] [product="ranbp1 domain containing protein"] [strand="-"]	1
pda-5p-131814_68	PDK_30s697991g001	3	15.597	1	20	1114	1133	AACAAAAGGCUUCUGUUCGG	UCGUAUAGAAGCAUUUUGUU	Cleavage	[locus_tag="PDK_30s697991L001"] [product="partial gene, no protein identified"] [strand="-"]	1
pda-5p-214434_31	PDK_30s1070441g004	3	20.662	1	22	2832	2853	AAUAUUCCUGCUGCUUGUCGCU	ACCAAAAGGCAGCAGGAAUGUU	Cleavage	[locus_tag="PDK_30s1070441L004"] [product="phytosulfokine receptor"] [strand="+"]	1
pda-miR156a_L+1	PDK_30s772931g003	1	15.287	1	21	446	466	AUGACAGAAGAGAGUGAGCAC	GUGCUCUCUCUCUUCUGUCAU	Cleavage	[locus_tag="PDK_30s772931L003"] [product="partial gene, no protein identified"] [strand="+"]	1
pda-miR156a_L+1	PDK_30s789261g002	2	23.842	1	21	248	268	AUGACAGAAGAGAGUGAGCAC	GUGCUCUCUCUCUUCUGUCAA	Cleavage	[locus_tag="PDK_30s789261L002"] [product="partial gene, no protein identified"] [strand="+"]	1
pda-miR156a_L+1	PDK_30s756061g001	2	21.536	1	21	674	694	AUGACAGAAGAGAGUGAGCAC	GUGCUCUCUCUCUUCUGUCAA	Cleavage	[locus_tag="PDK_30s756061L001"] [product="partial gene, no protein identified"] [strand="+"]	1
pda-miR156a_L+1	PDK_30s882821g001	2	20.571	1	21	1365	1385	AUGACAGAAGAGAGUGAGCAC	GUGCUCUCUCUCUUCUGUCAA	Cleavage	[locus_tag="PDK_30s882821L001"] [product="partial gene, no protein identified"] [strand="+"]	1
pda-miR156a_L+1	PDK_30s877561g003	2.5	8.299	1	20	1313	1332	AUGACAGAAGAGAGUGAGCA	UGCUCAAUUUGUUCUGUCAU	Translation	[locus_tag="PDK_30s877561L003"] [product="bipolar kinesin krp-"] [strand="-"]	1
pda-miR156a_L+1	PDK_30s1045441g001	3	17.266	1	20	368	387	AUGACAGAAGAGAGUGAGCA	UGUUCAAUCUCCUUUGUCAU	Translation	[locus_tag="PDK_30s1045441L001"] [product="agl20-like mads box transcription factor"] [strand="-"]	1
pda-miR156a_L+1	PDK_30s1010681g003	3	17.455	1	20	1003	1022	AUGACAGAAGAGAGUGAGCA	UCUUAAUUCUCUUCUGUCAU	Cleavage	[locus_tag="PDK_30s1010681L003"] [product="partial gene, no protein identified"] [strand="-"]	1
pda-miR168c-3p_R-1	PDK_30s967931g001	3	19.903	1	20	2524	2543	CCCGCCUUGCAUCAACUGAA	UGCAGUUGAUGCAAGUUGGG	Cleavage	[locus_tag="PDK_30s967931L001"] [product="esp4 (enhanced silencing phenotype 4) binding"] [strand="-"]	1
pda-5p-184243_40	PDK_30s853151g001	2.5	16.358	1	20	173	192	AGUGAGGUUAUUGUAGUUUG	CAAGCUACAAUGAACUCACU	Cleavage	[locus_tag="PDK_30s853151L001"] [product="leucine-rich repeat-containing"] [strand="+"]	1
pda-5p-184243_40	PDK_30s1131851g003	3	19.577	1	23	761	783	AGUGAGGUUAUUGUAGUUUGACU	AGGCAGACUACAACAACCUCUCU	Translation	[locus_tag="PDK_30s1131851L003"] [product="similar to predicted protein"] [strand="+"]	1
pda-5p-184243_40	PDK_30s1198261g001	3	19.079	1	20	89	108	AGUGAGGUUAUUGUAGUUUG	CAAGCUGUAACAACCUCGCU	Translation	[locus_tag="PDK_30s1198261L001"] [product="cytochrome p450"] [strand="+"]	1
pda-miR393a	PDK_30s803071g001	1	19.518	1	20	1503	1522	UCCAAAGGGAUCGCAUUGAU	AACAAUGCGAUCCCUUUGGA	Cleavage	[locus_tag="PDK_30s803071L001"] [product="transport inhibitor response 1"] [strand="+"]	1
pda-miR393a	PDK_30s894761g001	2	23.277	1	20	1059	1078	UCCAAAGGGAUCGCAUUGAU	GACAAUGCGAUCCCUUUGGA	Cleavage	[locus_tag="PDK_30s894761L001"] [product="transport inhibitor response 1"] [strand="+"]	1
pda-miR393a	PDK_30s947241g003	2	22.62	1	20	1221	1240	UCCAAAGGGAUCGCAUUGAU	GACAAUGCGAUCCCUUUGGA	Cleavage	[locus_tag="PDK_30s947241L003"] [product="transport inhibitor response 1"] [strand="+"]	1
pda-miR393a	PDK_30s1163791g001	3	15.908	1	20	41	60	UCCAAAGGGAUCGCAUUGAU	AUUAAUGCGGUGUCUUUGGG	Translation	[locus_tag="PDK_30s1163791L001"] [product="partial gene, no protein identified"] [strand="-"]	1
pda-miR529-3p	PDK_30s923751g001	2.5	19.648	1	21	69	89	GCUGUACCCUCUCUCUUCUUC	GAAGAAGAGAGGGGGUAAGGC	Cleavage	[locus_tag="PDK_30s923751L001"] [product="partial gene, no protein identified"] [strand="+"]	1
pda-miR529-3p	PDK_30s1113681g001	3	18.143	1	20	230	249	GCUGUACCCUCUCUCUUCUU	AAGAAGGCAGAGGGGACAGC	Cleavage	[locus_tag="PDK_30s1113681L001"] [product="similar to predicted protein"] [strand="+"]	1
pda-miR529-3p	PDK_30s932621g001	2.5	23.046	1	20	3	22	GCUGUACCCUCUCUCUUCUU	GGGGAGAGGGAGGGUGCAGC	Cleavage	[locus_tag="PDK_30s932621L001"] [product="apetala1-like protein"] [strand="+"]	1
pda-5p-260633_23	PDK_30s736671g001	3	21.429	1	23	634	656	UUUUGGACCCAGACCCGACCCGG	UUGGUUCUGGCCUGGGUCCAAAA	Cleavage	[locus_tag="PDK_30s736671L001"] [product="r2r3 myb transcription factor myb-if35"] [strand="-"]	1
pda-5p-271611_22	PDK_30s819001g003	3	16.718	1	21	164	184	AGCUAGAUCGGUCCUUCAUCG	CCAUGAUGGACUGGUCUAGCU	Cleavage	[locus_tag="PDK_30s819001L003"] [product="partial gene, no protein identified"] [strand="+"]	1
pda-3p-117840_82	PDK_30s1043961g001	2.5	19.672	1	20	367	386	AGGCACUUAUCGCCGGGCUA	AAGCCUGGCGAGAAGUGCCU	Translation	[locus_tag="PDK_30s1043961L001"] [product="partial gene, no protein identified"] [strand="-"]	1
pda-3p-88602_130	PDK_30s1167841g003	3	15.209	1	23	964	986	AGGAAGAAGAACUUGAACUCAAG	UUUCAAUUUAAGUUCUUCUUCUU	Cleavage	[locus_tag="PDK_30s1167841L003"] [product="fh protein nfh2"] [strand="-"]	1
pda-3p-88602_130	PDK_30s783031g003	3	11.541	1	22	359	380	AGGAAGAAGAACUUGAACUCAA	UUUAGUUCGAUUUCUUCUUCUU	Cleavage	[locus_tag="PDK_30s783031L003"] [product="partial gene, no protein identified"] [strand="-"]	1
pda-3p-88602_130	PDK_30s984861g008	3	20.471	1	23	926	948	AGGAAGAAGAACUUGAACUCAAG	CCUGAGUUCAGCUUCUUCUUGCU	Cleavage	[locus_tag="PDK_30s984861L008"] [product="dna binding"] [strand="-"]	1
pda-3p-88602_130	PDK_30s801211g003	2.5	15.766	1	24	807	830	AGGAAGAAGAACUUGAACUCAAGU	AGUAGAAUUCAAGCUCUUCUUCUU	Translation	[locus_tag="PDK_30s801211L003"] [product="dna-damage inducible protein"] [strand="-"]	1
pda-5p-353741_15	PDK_30s835241g004	2.5	13.677	1	22	120	141	AUUGAGAUGUUUGGGGACCUGG	CAAGGUCCCCAAAGAUCUGAAU	Translation	[locus_tag="PDK_30s835241L004"] [product="similar to predicted protein"] [strand="-"]	1
pda-5p-353741_15	PDK_30s839611g001	3	8.254	1	23	3791	3813	AUUGAGAUGUUUGGGGACCUGGU	AUAAGCUUCCCAAAUAUUUCAGU	Cleavage	[locus_tag="PDK_30s839611L001"] [product="frs3 (far1-related sequence 3) zinc ion binding"] [strand="-"]	1
pda-miR398a_R+1_1ss15AG	PDK_30s760501g002	3	16.793	1	22	100	121	UGUGUUCUCAGGUCGCCCCUUU	GAAGGGGAGACUUGAGAAUAUG	Cleavage	[locus_tag="PDK_30s760501L002"] [product="similar to predicted protein"] [strand="-"]	1
pda-miR398a_R+1_1ss15AG	PDK_30s657581g001	3	20.927	1	22	469	490	UGUGUUCUCAGGUCGCCCCUUU	GGAGGGGCGACUGGAGAACUCA	Translation	[locus_tag="PDK_30s657581L001"] [product="mads box"] [strand="-"]	1
pda-miR398a_R+1_1ss15AG	PDK_30s969551g002	3	22.458	1	21	543	563	UGUGUUCUCAGGUCGCCCCUU	GAGGGGGGACUGGAGGACACA	Translation	[locus_tag="PDK_30s969551L002"] [product="transparent testa 1"] [strand="+"]	1
pda-5p-181586_41	PDK_30s1147711g001	2.5	15.008	1	20	78	97	UUAUAACUACAGAUUUUCCA	UGGAAAAUCUGUGCUUAUGA	Cleavage	[locus_tag="PDK_30s1147711L001"] [product="glycyl-trna synthetase"] [strand="+"]	1
pda-5p-181586_41	PDK_30s841371g002	3	17.981	1	20	2154	2173	UUAUAACUACAGAUUUUCCA	UGGAAAGUUUGUUGUUGUGA	Cleavage	[locus_tag="PDK_30s841371L002"] [product="similar to predicted protein"] [strand="-"]	1
pda-5p-181586_41	PDK_30s732221g009	3	15.284	1	20	2185	2204	UUAUAACUACAGAUUUUCCA	CGGAAAAUGCGUAGUUAUAA	Translation	[locus_tag="PDK_30s732221L009"] [product="partial gene, no protein identified"] [strand="+"]	1
pda-5p-181586_41	PDK_30s890881g005	3	13.249	1	20	195	214	UUAUAACUACAGAUUUUCCA	UGAAAAGUCUGUUGUUGUAA	Cleavage	[locus_tag="PDK_30s890881L005"] [product="guanylate binding protein"] [strand="-"]	1
pda-3p-349991_15	PDK_30s1167791g015	2	18.404	1	20	282	301	UAAAUGCUGCUGUUGAUUCA	UGAAACAACAGCAGCGUUUG	Cleavage	[locus_tag="PDK_30s1167791L015"] [product="dna methyltransferase"] [strand="-"]	1
pda-3p-349991_15	PDK_30s6550965g002	3	10.902	1	20	250	269	UAAAUGCUGCUGUUGAUUCA	UGAAUCAACAGCAUCAUUCA	Cleavage	[locus_tag="PDK_30s6550965L002"] [product="charged multivesicular body protein 3"] [strand="-"]	1
pda-3p-349991_15	PDK_30s1100691g002	3	18.7	1	21	1610	1630	UAAAUGCUGCUGUUGAUUCAA	UAGGAUCAGCAUCAGCAUUUA	Translation	[locus_tag="PDK_30s1100691L002"] [product="partial gene, no protein identified"] [strand="+"]	1
pda-3p-349991_15	PDK_30s749151g001	3	14.413	1	20	664	683	UAAAUGCUGCUGUUGAUUCA	AGGAUAAACAGUAGCAUUUA	Cleavage	[locus_tag="PDK_30s749151L001"] [product="cellulose synthase"] [strand="-"]	1
pda-3p-349991_15	PDK_30s727771g001	3	20.417	1	20	1630	1649	UAAAUGCUGCUGUUGAUUCA	UGAGGCAGCGGCAGCAUUUG	Cleavage	[locus_tag="PDK_30s727771L001"] [product="serine threonine protein"] [strand="-"]	1
pda-5p-183654_40	PDK_30s729641g001	3	21.299	1	22	797	818	ACCUGUUUAGACCUGUUUAGAC	GGUUAAACAGGUCUAAACAGCC	Cleavage	[locus_tag="PDK_30s729641L001"] [product="thylakoid-bound ascorbate peroxidase"] [strand="+"]	1
pda-5p-183654_40	PDK_30s904221g004	3	12.303	1	24	232	255	ACCUGUUUAGACCUGUUUAGACCC	GGAUCUAAACAAGUUGAAAUAGGU	Translation	[locus_tag="PDK_30s904221L004"] [product="clathrin binding"] [strand="+"]	1
pda-5p-183654_40	PDK_30s833141g002	2	15.929	1	23	8	29	ACCUGUUUAGACCUGUUUAGACC	GGGCUAAACAGGU-UAAACAGGU	Translation	[locus_tag="PDK_30s833141L002"] [product="40s ribosomal protein s11"] [strand="+"]	1
pda-3p-130659_69	PDK_30s776781g006	2.5	18.559	1	20	519	538	ACAAAGCUUUGGAGAACUGU	ACAGUUCACCAAGGCUUUGA	Cleavage	[locus_tag="PDK_30s776781L006"] [product="enolase"] [strand="-"]	1
pda-3p-130659_69	PDK_30s1030471g008	3	16.141	1	21	690	710	ACAAAGCUUUGGAGAACUGUU	GACAGUUCUUCCAAGUUUUGG	Translation	[locus_tag="PDK_30s1030471L008"] [product="similar to predicted protein"] [strand="+"]	1
pda-3p-130659_69	PDK_30s65509272g006	3	19.938	1	21	38	58	ACAAAGCUUUGGAGAACUGUU	AAGAGCUCUACAAAGCUUUGU	Cleavage	[locus_tag="PDK_30s65509272L006"] [product="gibberellin 20-"] [strand="+"]	1
pda-3p-130659_69	PDK_30s953791g005	3	17.245	1	20	847	866	ACAAAGCUUUGGAGAACUGU	AGAGUCCUCCAAAGCUUUGA	Cleavage	[locus_tag="PDK_30s953791L005"] [product="transferring glycosyl"] [strand="-"]	1
pda-3p-132860_68	PDK_30s1136111g006	3	20.983	1	23	261	283	AGUACUCGGCUGAUGUACUCCGC	GCUGAGGUCAUUAGCCGAGUAUU	Cleavage	[locus_tag="PDK_30s1136111L006"] [product="partial gene, no protein identified"] [strand="-"]	1
pda-miR396a-3p_L+1_1ss21GA	PDK_30s1195041g001	2	24.224	1	20	205	224	GUUCAAUAAAGCUGUGGGAA	UUUCCACAGCUUUCUUGAAC	Cleavage	[locus_tag="PDK_30s1195041L001"] [product="partial gene, no protein identified"] [strand="-"]	1
pda-miR396a-3p_L+1_1ss21GA	PDK_30s6550975g001	2.5	19.104	1	21	608	628	GUUCAAUAAAGCUGUGGGAAA	UUCCUUGCAGCUUUAUUGAAC	Cleavage	[locus_tag="PDK_30s6550975L001"] [product="replication protein a 70 kda dna-bindingsubunit"] [strand="-"]	1
pda-miR396a-3p_L+1_1ss21GA	PDK_30s1043821g003	3	18.561	1	20	436	455	GUUCAAUAAAGCUGUGGGAA	AUCCCACAGCUUUAUUGUGC	Cleavage	[locus_tag="PDK_30s1043821L003"] [product="similar to predicted protein"] [strand="-"]	1
pda-miR396a-3p_L+1_1ss21GA	PDK_30s676851g001	3	18.618	1	20	192	211	GUUCAAUAAAGCUGUGGGAA	UGCUCACAGCUUUAUUGCAC	Cleavage	[locus_tag="PDK_30s676851L001"] [product="aminopeptidase fxna"] [strand="+"]	1
pda-5p-124075_75	PDK_30s857771g002	3	15.918	1	22	781	802	UUAGAGCAUCGUCCAGGAUUUU	GAAAUCCAGGUCGAUGCUUUAG	Cleavage	[locus_tag="PDK_30s857771L002"] [product="strawberry isoform d"] [strand="+"]	1
pda-5p-124075_75-R6	PDK_30s857771g002	3	15.918	1	22	781	802	UUAGAGCAUCGUCCAGGAUUUU	GAAAUCCAGGUCGAUGCUUUAG	Cleavage	[locus_tag="PDK_30s857771L002"] [product="strawberry isoform d"] [strand="+"]	1
pda-5p-113778_87	PDK_30s658831g002	2.5	22.209	1	21	375	395	UCUGCUGUUCACCCUGUGUUG	CGGCACAGGGUGGACGGCGGA	Cleavage	[locus_tag="PDK_30s658831L002"] [product="atp gtp-binding protein"] [strand="+"]	1
pda-5p-113778_87	PDK_30s1102701g001	3	16.39	1	20	2307	2326	UCUGCUGUUCACCCUGUGUU	AACCCAGGGUGUACAGUAGG	Translation	[locus_tag="PDK_30s1102701L001"] [product="partial gene, no protein identified"] [strand="-"]	1
pda-5p-113778_87	PDK_30s1094441g001	3	18.284	1	20	734	753	UCUGCUGUUCACCCUGUGUU	AAUACAGGCUGCACAGUAGA	Translation	[locus_tag="PDK_30s1094441L001"] [product="partial gene, no protein identified"] [strand="+"]	1
pda-5p-113778_87	PDK_30s710451g004	3	20.83	1	20	504	523	UCUGCUGUUCACCCUGUGUU	GACAGAGUGUGAACAGCAGG	Cleavage	[locus_tag="PDK_30s710451L004"] [product="b-cell receptor-associated protein 31-likecontaining protein"] [strand="+"]	1
pda-3p-117840_82-R3	PDK_30s1043961g001	2.5	19.672	1	20	367	386	AGGCACUUAUCGCCGGGCUA	AAGCCUGGCGAGAAGUGCCU	Translation	[locus_tag="PDK_30s1043961L001"] [product="partial gene, no protein identified"] [strand="-"]	1
pda-5p-93628_119	PDK_30s6550962g001	2.5	19.996	1	21	1631	1651	UAGCCAAGGAUGAUCUGCCUA	UAGGGAGGUCAUCUUUGGCUG	Cleavage	[locus_tag="PDK_30s6550962L001"] [product="partial gene, no protein identified"] [strand="+"]	1
pda-miR168a	PDK_30s1043821g002	3	15.069	1	21	649	669	UCGCUUGGUGCAGGUCGGGAA	UUCCCAACUUGCAACAAGUGA	Cleavage	[locus_tag="PDK_30s1043821L002"] [product="partial gene, no protein identified"] [strand="-"]	1
pda-miR166a-5p_1ss15CT	PDK_30s865121g003	2.5	11.297	1	20	39	58	GGAAUGUUGUCUGGUUCGAG	CUCGACCCAGACAGCAUUCG	Cleavage	[locus_tag="PDK_30s865121L003"] [product="partial gene, no protein identified"] [strand="-"]	1
pda-miR166a-5p_1ss15CT	PDK_30s1172371g001	2.5	19.009	1	20	1837	1856	GGAAUGUUGUCUGGUUCGAG	CUUGAACCAGACUAUGUUCC	Cleavage	[locus_tag="PDK_30s1172371L001"] [product="calmodulin binding"] [strand="+"]	1
pda-miR166a-5p_1ss15CT	PDK_30s708971g002	3	19.072	1	21	1203	1223	GGAAUGUUGUCUGGUUCGAGG	UCUCAAGCCAGCCAACAUUCU	Translation	[locus_tag="PDK_30s708971L002"] [product="u-box domain containing expressed"] [strand="+"]	1
pda-miR166a-5p_1ss15CT	PDK_30s999931g006	3	11.171	1	20	1026	1045	GGAAUGUUGUCUGGUUCGAG	CACGAACCAGACCACAUUCA	Cleavage	[locus_tag="PDK_30s999931L006"] [product="nucleotide binding"] [strand="-"]	1
pda-miR166a-5p_1ss15CT	PDK_30s772301g005	3	21.69	1	20	186	205	GGAAUGUUGUCUGGUUCGAG	CUCCAACUGGCCAACAUUCC	Translation	[locus_tag="PDK_30s772301L005"] [product="grx_s14 Grx_S15.1- glutaredoxin subgroup ii"] [strand="+"]	1
pda-miR530_2ss18TC20TA	PDK_30s65509724g002	1	17.133	1	21	70	90	UGCAUUUGCACCUGCACCUAC	GCAGGUGCAGGUGCAAAUGCA	Cleavage	[locus_tag="PDK_30s65509724L002"] [product="tzp dna binding nucleic acid binding zinc ionbinding"] [strand="+"]	1
pda-miR530_2ss18TC20TA	PDK_30s915891g001	3	15.257	1	21	10	30	UGCAUUUGCACCUGCACCUAC	GUAGGUGCAGAUGCGGGUGCG	Translation	[locus_tag="PDK_30s915891L001"] [product="similar to predicted protein"] [strand="+"]	1
pda-miR530_2ss18TC20TA	PDK_30s764411g002	3	21.386	1	21	13	33	UGCAUUUGCACCUGCACCUAC	GUAGGUGCAGAUGCGGGUGCG	Translation	[locus_tag="PDK_30s764411L002"] [product="similar to predicted protein"] [strand="+"]	1
pda-miR530_2ss18TC20TA	PDK_30s702691g032	3	16.409	1	20	545	564	UGCAUUUGCACCUGCACCUA	CAGGUCCAGGGGCAAAUGCA	Translation	[locus_tag="PDK_30s702691L032"] [product="tpr domain containing protein"] [strand="+"]	1
pda-5p-264205_23	PDK_30s954101g001	3	16.807	1	21	342	362	UUUUUGCAAUAAUGCCCCUUC	GGAGGGGUAUUAUGGCGAAAG	Cleavage	[locus_tag="PDK_30s954101L001"] [product="cytochrome p450"] [strand="-"]	1
pda-5p-264205_23	PDK_30s1077111g001	3	22.393	1	21	526	546	UUUUUGCAAUAAUGCCCCUUC	GGAUGGGCAUUGUUGUAGAAA	Cleavage	[locus_tag="PDK_30s1077111L001"] [product="snf2 histone linker phd ring helicase"] [strand="-"]	1
pda-5p-264205_23	PDK_30s1015301g001	2.5	15.107	1	21	1095	1115	UUUUUGCAAUAAUGCCCCUUC	GAAGGGACAUUGGUGCAAAAA	Translation	[locus_tag="PDK_30s1015301L001"] [product="coiled-coil domain containing 22"] [strand="+"]	1
pda-5p-264205_23	PDK_30s1187611g001	2.5	14.258	1	21	1507	1527	UUUUUGCAAUAAUGCCCCUUC	GAAGGGACAUUGGUGCAAAAA	Translation	[locus_tag="PDK_30s1187611L001"] [product="coiled-coil domain containing 22"] [strand="+"]	1
pda-5p-264205_23	PDK_30s759641g001	2.5	21.9	1	20	1433	1452	UUUUUGCAAUAAUGCCCCUU	AAGGGGUAUUCUUGCAGAAG	Translation	[locus_tag="PDK_30s759641L001"] [product="purple acid phosphatase"] [strand="+"]	1
pda-5p-264205_23	PDK_30s65509170g001	3	16.242	1	20	528	547	UUUUUGCAAUAAUGCCCCUU	CAGUGUCAUUAUUGCAAAAA	Cleavage	[locus_tag="PDK_30s65509170L001"] [product="retrotransposon unclassified"] [strand="+"]	1
pda-5p-264205_23	PDK_30s1064701g001	3	22.305	1	20	729	748	UUUUUGCAAUAAUGCCCCUU	GAGGGCCACUGUUGCAAAAA	Cleavage	[locus_tag="PDK_30s1064701L001"] [product="nucleolar protein gar2-related"] [strand="+"]	1
pda-3p-398260_13	PDK_30s888011g002	2	16.09	1	20	862	881	CCAGCGCUGCAUUCGAUAAU	AUUAUCGAGUGCAGCGUUGA	Cleavage	[locus_tag="PDK_30s888011L002"] [product="partial gene, no protein identified"] [strand="-"]	1
pda-3p-398260_13	PDK_30s732171g004	2.5	22.556	1	20	1015	1034	CCAGCGCUGCAUUCGAUAAU	GUUAUCGAGUGCAGCGUUGA	Cleavage	[locus_tag="PDK_30s732171L004"] [product="laccase 110a"] [strand="-"]	1
pda-3p-398260_13	PDK_30s807521g002	3	14.619	1	20	151	170	CCAGCGCUGCAUUCGAUAAU	AUUAUUGACUGCAGCGUUGA	Cleavage	[locus_tag="PDK_30s807521L002"] [product="laccase 110a"] [strand="-"]	1
pda-miR167-3p_2ss10GT20CT	PDK_30s1137981g001	3	15.613	1	21	490	510	AGAUCAUGUUGCAGUUUCAUC	GAUGAAACUGCAUCAUGGUUC	Translation	[locus_tag="PDK_30s1137981L001"] [product="helix-loop-helix dna-binding domain containingexpressed"] [strand="+"]	1
pda-miR167-3p_2ss10GT20CT	PDK_30s861301g001	3	11.173	1	20	21	40	AGAUCAUGUUGCAGUUUCAU	AUGCAACUGCAACUUGAUUU	Cleavage	[locus_tag="PDK_30s861301L001"] [product="partial gene, no protein identified"] [strand="+"]	1
pda-miR167-3p_2ss10GT20CT	PDK_30s1098691g002	3	21.48	1	20	1001	1019	AGAUCAUGUUGCAGUUUCAU	AUGAAACUGCAACA-GAUUU	Cleavage	[locus_tag="PDK_30s1098691L002"] [product="bri1-kd interacting protein"] [strand="+"]	1
pda-miR168a_R-1	PDK_30s1043821g002	3	15.069	1	20	650	669	UCGCUUGGUGCAGGUCGGGA	UCCCAACUUGCAACAAGUGA	Cleavage	[locus_tag="PDK_30s1043821L002"] [product="partial gene, no protein identified"] [strand="-"]	1
pda-5p-255507_24	PDK_30s1123951g001	2	17.652	1	20	530	549	CACCGUUGGAUCAUCCACAG	CUGUGGAUGAUCGAACGGUU	Cleavage	[locus_tag="PDK_30s1123951L001"] [product="myosin-like protein"] [strand="+"]	1
pda-5p-255507_24	PDK_30s921201g001	2	20.928	1	20	14	33	CACCGUUGGAUCAUCCACAG	CGGUGGAUGAUCCAACGGUU	Cleavage	[locus_tag="PDK_30s921201L001"] [product="partial gene, no protein identified"] [strand="+"]	1
pda-5p-255507_24	PDK_30s973011g001	3	16.391	1	20	2531	2550	CACCGUUGGAUCAUCCACAG	ACGUGGAUGAUCCAACGGUA	Cleavage	[locus_tag="PDK_30s973011L001"] [product="similar to predicted protein"] [strand="-"]	1
pda-5p-255507_24	PDK_30s1143341g001	3	17.28	1	21	1753	1773	CACCGUUGGAUCAUCCACAGG	CCUUUUGGUGAUCCAAUGGUG	Cleavage	[locus_tag="PDK_30s1143341L001"] [product="ap2 domain-containing transcription factor"] [strand="+"]	1
pda-5p-255507_24	PDK_30s672321g005	3	23.186	1	21	540	560	CACCGUUGGAUCAUCCACAGG	CCAUUGGAUAAUCCAACGGUG	Cleavage	[locus_tag="PDK_30s672321L005"] [product="partial gene, no protein identified"] [strand="+"]	1
pda-5p-255507_24	PDK_30s673181g004	3	23.835	1	20	848	867	CACCGUUGGAUCAUCCACAG	CUGUGGAGGAGCCGGCGGUG	Translation	[locus_tag="PDK_30s673181L004"] [product="partial gene, no protein identified"] [strand="+"]	1
pda-miR397-p3_1ss6GA	PDK_30s852831g001	3	23.101	1	21	2058	2078	CCAGCACUGCACUCAAUCAUG	UGUGGUUGAGUUCAGUGCUGA	Translation	[locus_tag="PDK_30s852831L001"] [product="similar to predicted protein"] [strand="+"]	1
pda-miR397-p3_1ss6GA	PDK_30s1050381g008	3	17.113	1	20	1499	1518	CCAGCACUGCACUCAAUCAU	AUGAUGGAGUUCAGUGCUGU	Translation	[locus_tag="PDK_30s1050381L008"] [product="partial gene, no protein identified"] [strand="-"]	1
pda-3p-117918_82	PDK_30s1212491g001	3	20.46	1	20	342	361	CGGAUGCUGCGCCUCGUGUA	UACAGCAGCCGCAGCAUCCG	Cleavage	[locus_tag="PDK_30s1212491L001"] [product="leucine-rich repeat containing"] [strand="-"]	1
pda-3p-64787_213	PDK_30s1009981g001	3	20.533	1	21	1528	1548	GUGCUCUUUCUCGUUGUCACC	GGUGACAGGGAGCAGGAGCAC	Translation	[locus_tag="PDK_30s1009981L001"] [product="partial gene, no protein identified"] [strand="+"]	1
pda-3p-64787_213	PDK_30s1180271g001	3	17.44	1	20	277	296	GUGCUCUUUCUCGUUGUCAC	GUGACAACGAUGAAGAACAC	Translation	[locus_tag="PDK_30s1180271L001"] [product="partial gene, no protein identified"] [strand="+"]	1
pda-3p-98930_109	PDK_30s803881g001	2.5	20.598	1	20	592	611	UCGGAAAGACUCGUUCCAAA	AAUGGAACGAGUCUUUCCGG	Cleavage	[locus_tag="PDK_30s803881L001"] [product="lethal leaf-spot 1"] [strand="-"]	1
pda-miR166a-5p	PDK_30s865121g003	2.5	11.297	1	20	39	58	GGAAUGUUGUCUGGCUCGAG	CUCGACCCAGACAGCAUUCG	Cleavage	[locus_tag="PDK_30s865121L003"] [product="partial gene, no protein identified"] [strand="-"]	1
pda-miR166a-5p	PDK_30s708971g002	2.5	19.072	1	21	1203	1223	GGAAUGUUGUCUGGCUCGAGG	UCUCAAGCCAGCCAACAUUCU	Translation	[locus_tag="PDK_30s708971L002"] [product="u-box domain containing expressed"] [strand="+"]	1
pda-5p-28659_707	PDK_30s1080871g002	2.5	16.103	1	20	1489	1508	GUUCCCUCAGACACUUCACU	AGUGAAGUUUCUGAGGGUAC	Cleavage	[locus_tag="PDK_30s1080871L002"] [product="similar to predicted protein"] [strand="+"]	1
pda-miR160a-5p	PDK_30s951701g002	0.5	18.694	1	21	798	818	UGCCUGGCUCCCUGUAUGCCA	UGGCAUGCAGGGAGCCAGGCA	Cleavage	[locus_tag="PDK_30s951701L002"] [product="auxin response"] [strand="+"]	1
pda-miR160a-5p	PDK_30s718951g001	0	20.128	1	20	1378	1397	UGCCUGGCUCCCUGUAUGCC	GGCAUACAGGGAGCCAGGCA	Cleavage	[locus_tag="PDK_30s718951L001"] [product="similar to predicted protein"] [strand="+"]	1
pda-miR160a-5p	PDK_30s1131851g004	3	24.839	1	20	790	809	UGCCUGGCUCCCUGUAUGCC	GGCGUAGAGGGAGCCGGGCU	Cleavage	[locus_tag="PDK_30s1131851L004"] [product="similar to predicted protein"] [strand="-"]	1
pda-miR160a-5p	PDK_30s1124891g002	3	21.756	1	20	277	296	UGCCUGGCUCCCUGUAUGCC	GGCAUACAAGGAGCUUGGCA	Cleavage	[locus_tag="PDK_30s1124891L002"] [product="nac domain ipr003441"] [strand="-"]	1
pda-miR160a-5p	PDK_30s966231g001	3	21.747	1	20	1323	1342	UGCCUGGCUCCCUGUAUGCC	GUCAAGUAGGGAGCCAGGCA	Cleavage	[locus_tag="PDK_30s966231L001"] [product="similar to predicted protein"] [strand="+"]	1
pda-miR160a-5p	PDK_30s1036201g002	3	20.805	1	20	264	283	UGCCUGGCUCCCUGUAUGCC	GGCAUACGUGGAAUCAGGCA	Cleavage	[locus_tag="PDK_30s1036201L002"] [product="similar to predicted protein"] [strand="+"]	1
pda-5p-104109_100	PDK_30s784721g001	3	15.413	1	23	1165	1187	AGUGAAAGUCGGCAAACCAAUUG	UGAUUCGUUUGAUGACUUUCAUU	Cleavage	[locus_tag="PDK_30s784721L001"] [product="pentatricopeptide repeat-containing protein"] [strand="-"]	1
pda-5p-104109_100	PDK_30s1021181g001	3	16.942	1	24	1651	1675	AGUGAAAGUC-GGCAAACCAAUUGC	GGAACUGGUUUGCCAGAUUUUCAUU	Translation	[locus_tag="PDK_30s1021181L001"] [product="partial gene, no protein identified"] [strand="+"]	1
pda-miR169b-3p_2ss15C-22AC	PDK_30s983881g003	3	17.574	1	20	707	726	GGCAAGUUGUCCUUGGCUAC	GUAACCAAGGAAAAUUUGCU	Translation	[locus_tag="PDK_30s983881L003"] [product="puromycin-sensitive aminopeptidase"] [strand="+"]	1
pda-5p-152404_54	PDK_30s65509116g001	3	17.045	1	20	187	206	ACCGGCGGUAAGAUUUUGUA	UAUGAAAACUUACUGCUGGU	Cleavage	[locus_tag="PDK_30s65509116L001"] [product="similar to predicted protein"] [strand="+"]	1
pda-5p-152404_54	PDK_30s739721g004	3	22.202	1	20	1073	1092	ACCGGCGGUAAGAUUUUGUA	UACGAGGUAUUGCCGCCGGU	Cleavage	[locus_tag="PDK_30s739721L004"] [product="similar to predicted protein"] [strand="+"]	1
pda-5p-396570_13	PDK_30s854261g002	3	22.85	1	20	25	44	AGAGUCGUGCGGUCUACAGA	UCUGUAGAGAGCAUGGCUCU	Translation	[locus_tag="PDK_30s854261L002"] [product="glycerol-3-phosphate dehydrogenase"] [strand="-"]	1
pda-3p-94240_118	PDK_30s909601g004	3	23.407	1	23	648	670	AUGCAGAAUCUCCUGAGUACUCG	UGAGUUUUCAGGAGAUGCUGCAU	Cleavage	[locus_tag="PDK_30s909601L004"] [product="partial gene, no protein identified"] [strand="+"]	1
pda-5p-16728_1419	PDK_30s901101g001	3	23.431	1	21	17	37	GUUCCCUCCAUUCACUUCAGC	GCUGGGGUGGAUGGAGGGACC	Cleavage	[locus_tag="PDK_30s901101L001"] [product="filamentation temperature-sensitive h 2b"] [strand="-"]	1
pda-5p-16728_1419	PDK_30s866091g002	3	15.044	1	20	1310	1330	GUUCCCUCCAUUC-ACUUCAG	UUGAAGUUGAAUGGAGGGAAA	Cleavage	[locus_tag="PDK_30s866091L002"] [product="far1 zinc swim-type"] [strand="+"]	1
pda-5p-16728_1419	PDK_30s915641g005	3	16.516	1	20	477	496	GUUCCCUCCAUUCACUUCAG	CUUAAGUGGUUGGAGGGGAC	Translation	[locus_tag="PDK_30s915641L005"] [product="photosystem ii 11 kda"] [strand="+"]	1
pda-miR4376_L+1R-2_1ss2AT	PDK_30s740551g019	2.5	22.931	1	20	595	614	UUCGCAGGAGAGAUGAUGCU	AGCAUCAUUGCUCUUGCGAG	Translation	[locus_tag="PDK_30s740551L019"] [product="endoplasmic reticulum"] [strand="-"]	1
pda-miR4376_L+1R-2_1ss2AT	PDK_30s838351g003	3	17.079	1	20	12	31	UUCGCAGGAGAGAUGAUGCU	AGCAUUAUCUAUUCUGCGGG	Translation	[locus_tag="PDK_30s838351L003"] [product="type-b response regulator"] [strand="+"]	1
pda-miR171	PDK_30s1089541g003	3	15.241	1	20	276	295	UGAUUGAGCCGUGCCAAUAU	UUAUUGGCACGGUUCAGUCU	Cleavage	[locus_tag="PDK_30s1089541L003"] [product="similar to predicted protein"] [strand="+"]	1
pda-miR169_1ss20TG	PDK_30s6550962g001	3	19.996	1	21	1631	1651	CAGCCAAGGAUGACUUGCCGA	UAGGGAGGUCAUCUUUGGCUG	Cleavage	[locus_tag="PDK_30s6550962L001"] [product="partial gene, no protein identified"] [strand="+"]	1
pda-miR394a-5p_1ss8TG	PDK_30s1008061g001	1	24.438	1	20	906	925	UUGGCAUGCUGUCCACCUCC	GGAGGUGGACAGAAUGCCAA	Cleavage	[locus_tag="PDK_30s1008061L001"] [product="partial gene, no protein identified"] [strand="+"]	1
pda-miR394a-5p_1ss8TG	PDK_30s758481g001	2.5	19.047	1	20	1769	1788	UUGGCAUGCUGUCCACCUCC	GGGAUUGGACAGCAUGCCAA	Cleavage	[locus_tag="PDK_30s758481L001"] [product="blast resistance protein"] [strand="+"]	1
pda-miR394a-5p_1ss8TG	PDK_30s885271g002	3	19.318	1	20	599	618	UUGGCAUGCUGUCCACCUCC	GGUGUUGGACAGGAUGCCAA	Cleavage	[locus_tag="PDK_30s885271L002"] [product="pentatricopeptide repeat-containing"] [strand="+"]	1
pda-5p-83202_144	PDK_30s1154451g001	1.5	17.622	1	24	44	67	ACCAGUCCGAGAAUCGUUUCAAUC	GGUUGAAACAAUUUUCGGACUGGU	Cleavage	[locus_tag="PDK_30s1154451L001"] [product="partial gene, no protein identified"] [strand="+"]	1
pda-5p-83202_144	PDK_30s745071g002	3	20.727	1	20	1448	1467	ACCAGUCCGAGAAUCGUUUC	UGGACGAUUUUCGGAUUGGU	Cleavage	[locus_tag="PDK_30s745071L002"] [product="6-phosphofructokinase 2"] [strand="-"]	1
pda-5p-83202_144	PDK_30s668711g007	2.5	20.558	1	24	134	157	ACCAGUCCGAGAAUCGUUUCAAUC	GUUCGAAACCGUUCUCUGACUGGU	Cleavage	[locus_tag="PDK_30s668711L007"] [product="atp-dependent rna and dna"] [strand="-"]	1
pda-5p-83202_144	PDK_30s886401g002	3	18.38	1	20	1406	1425	ACCAGUCCGAGAAUCGUUUC	GAAGUGGUUUACGGACUGGU	Translation	[locus_tag="PDK_30s886401L002"] [product="partial gene, no protein identified"] [strand="+"]	1
pda-5p-85498_137	PDK_30s804191g003	2	12.781	1	20	793	812	UGGAAGGGACAUGCAGAGGA	UCUUCUGCAUAUCUCUUCCA	Translation	[locus_tag="PDK_30s804191L003"] [product="microtubule associated protein family expressed"] [strand="-"]	1
pda-5p-85498_137	PDK_30s706291g001	3	12.29	1	21	779	799	UGGAAGGGACAUGCAGAGGAA	UUUCUUUGUAAGUUCCUUCCA	Translation	[locus_tag="PDK_30s706291L001"] [product="partial gene, no protein identified"] [strand="-"]	1
pda-5p-85498_137	PDK_30s1154711g002	3	9.736	1	20	198	217	UGGAAGGGACAUGCAGAGGA	UCCUCUGCAUGUCACCUCCA	Cleavage	[locus_tag="PDK_30s1154711L002"] [product="hexokinase 1"] [strand="-"]	1
pda-5p-85498_137	PDK_30s671741g004	2.5	23.531	1	20	944	963	UGGAAGGGACAUGCAGAGGA	UCCUUUGCAUUUUUCUUCCA	Translation	[locus_tag="PDK_30s671741L004"] [product="partial gene, no protein identified"] [strand="+"]	1
pda-5p-85498_137	PDK_30s1150541g003	3	14.254	1	21	213	233	UGGAAGGGACAUGCAGAGGAA	UGUCUCUGUAUCUCCCUUCCA	Translation	[locus_tag="PDK_30s1150541L003"] [product="similar to predicted protein"] [strand="-"]	1
pda-5p-85498_137	PDK_30s1074181g006	3	5.33	1	21	377	397	UGGAAGGGACAUGCAGAGGAA	UUCCUCUCCAUUUCUCUUUCA	Translation	[locus_tag="PDK_30s1074181L006"] [product="pax transcription activation domain interacting"] [strand="-"]	1
pda-5p-85498_137	PDK_30s910541g004	3	10.502	1	21	82	102	UGGAAGGGACAUGCAGAGGAA	UUUCCCUGCUUGUUCCUUCCA	Cleavage	[locus_tag="PDK_30s910541L004"] [product="kinesin-like calmodulin-binding protein"] [strand="-"]	1
pda-5p-85498_137	PDK_30s877101g002	3	8.622	1	20	379	398	UGGAAGGGACAUGCAGAGGA	UCCUUUCCAUCUUCCUUCCA	Translation	[locus_tag="PDK_30s877101L002"] [product="similar to predicted protein"] [strand="-"]	1
pda-miR156i-3p_L-1_1ss22TG	PDK_30s740851g001	3	20.003	1	20	562	581	GCUCACUUCUCUUUCUGUCA	GGGCAGAAGGGGAAGUGGGC	Cleavage	[locus_tag="PDK_30s740851L001"] [product="partial gene, no protein identified"] [strand="+"]	1
pda-miR156i-3p_L-1_1ss22TG	PDK_30s1066501g001	3	22.158	1	20	1048	1067	GCUCACUUCUCUUUCUGUCA	CGGCGGGAGGAGAAGUGAGC	Cleavage	[locus_tag="PDK_30s1066501L001"] [product="retrotransposon ty3-gypsy subclass"] [strand="-"]	1
pda-miR156i-3p_L-1_1ss22TG	PDK_30s1131841g001	3	15.982	1	20	50	69	GCUCACUUCUCUUUCUGUCA	CGGCGGGAGGAGAAGUGAGC	Cleavage	[locus_tag="PDK_30s1131841L001"] [product="partial gene, no protein identified"] [strand="-"]	1
pda-miR156i-3p_L-1_1ss22TG	PDK_30s1085741g001	3	18.773	1	21	634	654	GCUCACUUCUCUUUCUGUCAG	UUGGCAGGUGGAGAGGUGAGC	Cleavage	[locus_tag="PDK_30s1085741L001"] [product="bhlh transcription factor"] [strand="+"]	1
pda-miR156i-3p_L-1_1ss22TG	PDK_30s732221g009	3	22.722	1	20	2909	2928	GCUCACUUCUCUUUCUGUCA	UGAAAGAAAGGGGAGUGAGG	Cleavage	[locus_tag="PDK_30s732221L009"] [product="partial gene, no protein identified"] [strand="+"]	1
pda-miR156i-3p_L-1_1ss22TG	PDK_30s978251g001	3	9.745	1	20	182	201	GCUCACUUCUCUUUCUGUCA	GGAAGGAAAGGGAAGUGAGC	Cleavage	[locus_tag="PDK_30s978251L001"] [product="similar to predicted protein"] [strand="+"]	1
pda-miR395b-p3	PDK_30s1212481g007	2.5	19.872	1	21	1184	1204	AAGUGUUUGGGGGAACUCUAG	CUGGAGUGCCCCCAAACACUG	Cleavage	[locus_tag="PDK_30s1212481L007"] [product="pentatricopeptide repeat-containing"] [strand="+"]	1
pda-miR395b-p3	PDK_30s986061g002	3	19.942	1	20	125	144	AAGUGUUUGGGGGAACUCUA	CCGAGUUCCUCCAAGCACUU	Cleavage	[locus_tag="PDK_30s986061L002"] [product="atp sulfurylase"] [strand="+"]	1
pda-miR395b-p3	PDK_30s927641g001	3	14.176	1	20	316	335	AAGUGUUUGGGGGAACUCUA	AAGAGUUUCUUCAAACAUUU	Cleavage	[locus_tag="PDK_30s927641L001"] [product="histone acetyltransferase hat b"] [strand="+"]	1
pda-miR395b-p3	PDK_30s974041g002	3	20.217	1	21	4948	4968	AAGUGUUUGGGGGAACUCUAG	UUAGAGUUCCCUAAAGUAUUU	Translation	[locus_tag="PDK_30s974041L002"] [product="partial gene, no protein identified"] [strand="+"]	1
pda-miR395b-p3	PDK_30s1146891g001	3	12.986	1	21	733	753	AAGUGUUUGGGGGAACUCUAG	UUUGAGUGCCCUCAAACAUUU	Cleavage	[locus_tag="PDK_30s1146891L001"] [product="resistance complex protein i2c-1"] [strand="+"]	1
pda-miR397_2ss5TC20CT	PDK_30s967451g001	3	16.926	1	21	135	155	UCAUCGAGUGCAGCGUUGAUG	CAUCAAUGGUGCACUCGAUCA	Cleavage	[locus_tag="PDK_30s967451L001"] [product="partial gene, no protein identified"] [strand="+"]	1
pda-miR397_2ss5TC20CT	PDK_30s1170901g001	3	19.094	1	21	108	128	UCAUCGAGUGCAGCGUUGAUG	CGUCAACGCUGCUCUCAAUGA	Translation	[locus_tag="PDK_30s1170901L001"] [product="diphenol oxidase"] [strand="+"]	1
pda-miR397_2ss5TC20CT	PDK_30s6550951g005	3	12.637	1	21	396	416	UCAUCGAGUGCAGCGUUGAUG	CGUCAACGCUGCUCUCAAUGA	Translation	[locus_tag="PDK_30s6550951L005"] [product="diphenol oxidase"] [strand="+"]	1
pda-miR397_2ss5TC20CT	PDK_30s775611g003	3	16.024	1	20	1892	1911	UCAUCGAGUGCAGCGUUGAU	UUCAAUGUUGUACUUGAUGA	Cleavage	[locus_tag="PDK_30s775611L003"] [product="similar to predicted protein"] [strand="-"]	1
pda-miR397_2ss5TC20CT	PDK_30s906701g001	2.5	23.27	1	20	145	164	UCAUCGAGUGCAGCGUUGAU	AUCGGCGAUGUACUCGAUGA	Cleavage	[locus_tag="PDK_30s906701L001"] [product="partial gene, no protein identified"] [strand="+"]	1
pda-miR397_2ss5TC20CT	PDK_30s661361g002	3	12.399	1	20	688	707	UCAUCGAGUGCAGCGUUGAU	AUCAACGCUGCACUCAACGA	Cleavage	[locus_tag="PDK_30s661361L002"] [product="similar to predicted protein"] [strand="+"]	1
pda-miR397_2ss5TC20CT	PDK_30s693681g002	3	17.503	1	21	675	695	UCAUCGAGUGCAGCGUUGAUG	UGUCAACGCUGCUCUCAAUGA	Translation	[locus_tag="PDK_30s693681L002"] [product="laccase (diphenol oxidase)-like protein"] [strand="+"]	1
pda-miR167a_R-1_1ss19CT	PDK_30s1142631g001	2.5	15.996	1	20	330	349	UGAAGCUGCCAGCAUGAUUU	GAAUUAUGUUGGGAGCUUCA	Cleavage	[locus_tag="PDK_30s1142631L001"] [product="similar to predicted protein"] [strand="-"]	1
pda-miR167a_R-1_1ss19CT	PDK_30s65509691g003	3	17.32	1	20	510	529	UGAAGCUGCCAGCAUGAUUU	AAAAUAUGCUGGUAGCUUUG	Cleavage	[locus_tag="PDK_30s65509691L003"] [product="ap2 domain transcription factor"] [strand="+"]	1
pda-miR167a_R-1_1ss19CT	PDK_30s1149451g003	3	14.698	1	20	409	428	UGAAGCUGCCAGCAUGAUUU	AAAUCGUUCUGACAGCUUUA	Translation	[locus_tag="PDK_30s1149451L003"] [product="partial gene, no protein identified"] [strand="-"]	1
pda-miR167a_R-1_1ss19CT	PDK_30s1201081g001	3	14.943	1	20	494	513	UGAAGCUGCCAGCAUGAUUU	AUAUUAUCUUGGCAGCUUCA	Cleavage	[locus_tag="PDK_30s1201081L001"] [product="f-box-containing protein 2"] [strand="+"]	1
pda-3p-44090_382	PDK_30s937331g001	1.5	23.754	1	20	726	745	UUCAAGAAAGUCAGUGGAAG	CUUCCACAGGCUUUCUUGAA	Cleavage	[locus_tag="PDK_30s937331L001"] [product="transcription activator"] [strand="-"]	1
pda-3p-44090_382	PDK_30s842421g002	1.5	21.612	1	20	996	1015	UUCAAGAAAGUCAGUGGAAG	CUUCCACAGGCUUUCUUGAA	Cleavage	[locus_tag="PDK_30s842421L002"] [product="transcription activator"] [strand="-"]	1
pda-3p-44090_382	PDK_30s897081g005	1.5	24.957	1	20	2136	2155	UUCAAGAAAGUCAGUGGAAG	CUUCCACAGGCUUUCUUGAA	Cleavage	[locus_tag="PDK_30s897081L005"] [product="c2h2 finger and ankyrin domain"] [strand="-"]	1
pda-3p-44090_382	PDK_30s1024341g003	3	15.042	1	20	602	621	UUCAAGAAAGUCAGUGGAAG	UUUUUACUGAUUUUCUUGAU	Cleavage	[locus_tag="PDK_30s1024341L003"] [product="partial gene, no protein identified"] [strand="+"]	1
pda-3p-44090_382	PDK_30s869931g001	2.5	21.226	1	20	263	282	UUCAAGAAAGUCAGUGGAAG	CUUGUGCUGAUUUUCUUGAA	Cleavage	[locus_tag="PDK_30s869931L001"] [product="similar to predicted protein"] [strand="+"]	1
pda-3p-44090_382	PDK_30s1006281g001	2.5	14.653	1	20	494	513	UUCAAGAAAGUCAGUGGAAG	CUUCCGUGGACUUUUUUGAA	Cleavage	[locus_tag="PDK_30s1006281L001"] [product="iaa-amino acid hydrolase"] [strand="+"]	1
pda-3p-44090_382	PDK_30s873951g014	3	21.641	1	20	524	543	UUCAAGAAAGUCAGUGGAAG	UUUUCACUUGUUUUCUUGAA	Cleavage	[locus_tag="PDK_30s873951L014"] [product="partial gene, no protein identified"] [strand="-"]	1
pda-3p-44090_382	PDK_30s1008861g005	2.5	24.123	1	20	219	238	UUCAAGAAAGUCAGUGGAAG	CUUCCACAUGCUUUCUUGAA	Cleavage	[locus_tag="PDK_30s1008861L005"] [product="growth-regulating factor 1"] [strand="-"]	1
pda-3p-44090_382	PDK_30s894521g002	3	14.664	1	20	1181	1200	UUCAAGAAAGUCAGUGGAAG	CUUUCACUGACAUUCUUAAA	Translation	[locus_tag="PDK_30s894521L002"] [product="partial gene, no protein identified"] [strand="+"]	1
pda-3p-44090_382	PDK_30s893331g003	3	21.547	1	20	1232	1251	UUCAAGAAAGUCAGUGGAAG	CUUUCCCUGGUUUUCUUGGA	Cleavage	[locus_tag="PDK_30s893331L003"] [product="partial gene, no protein identified"] [strand="-"]	1
pda-3p-44090_382	PDK_30s901301g004	2.5	21.448	1	20	476	495	UUCAAGAAAGUCAGUGGAAG	UUUCCACUGAACUUCUUGAA	Translation	[locus_tag="PDK_30s901301L004"] [product="partial gene, no protein identified"] [strand="+"]	1
pda-3p-44090_382	PDK_30s917701g002	3	16.264	1	20	1781	1800	UUCAAGAAAGUCAGUGGAAG	CUUUCACUGACAUUCUUAAA	Translation	[locus_tag="PDK_30s917701L002"] [product="partial gene, no protein identified"] [strand="+"]	1
pda-3p-44090_382	PDK_30s888861g003	2.5	18.912	1	20	2819	2838	UUCAAGAAAGUCAGUGGAAG	CUGAUACUGACUUUCUUGAA	Cleavage	[locus_tag="PDK_30s888861L003"] [product="isoleucyl-trna synthetase"] [strand="+"]	1
pda-3p-44090_382	PDK_30s673103g002	3	14.104	1	20	448	467	UUCAAGAAAGUCAGUGGAAG	CUACUGAUGACUUUCUUGAA	Cleavage	[locus_tag="PDK_30s673103L002"] [product="similar to predicted protein"] [strand="+"]	1
pda-3p-44090_382	PDK_30s827541g001	3	22.12	1	20	259	278	UUCAAGAAAGUCAGUGGAAG	CUUUCAAUGGAUUUCUUGAA	Translation	[locus_tag="PDK_30s827541L001"] [product="partial gene, no protein identified"] [strand="+"]	1
pda-3p-44090_382	PDK_30s894041g001	3	20.321	1	20	600	619	UUCAAGAAAGUCAGUGGAAG	UUUCCACAUGCUUUCUUGAA	Cleavage	[locus_tag="PDK_30s894041L001"] [product="transcription activator"] [strand="-"]	1
pda-5p-85614_137	PDK_30s760481g002	3	23.808	1	22	161	182	AGCUCCCUUGCCAGCUUUAGCC	GGAUGAAGCUGGGGAGGGAGCU	Translation	[locus_tag="PDK_30s760481L002"] [product="partial gene, no protein identified"] [strand="-"]	1
pda-miR394a-5p_1ss19CT	PDK_30s1008061g001	0.5	24.438	1	20	906	925	UUGGCAUUCUGUCCACCUUC	GGAGGUGGACAGAAUGCCAA	Cleavage	[locus_tag="PDK_30s1008061L001"] [product="partial gene, no protein identified"] [strand="+"]	1
pda-miR394a-5p_1ss19CT	PDK_30s806321g007	2	18.555	1	20	166	185	UUGGCAUUCUGUCCACCUUC	GAAGGUGGACAAGAUGUCAA	Translation	[locus_tag="PDK_30s806321L007"] [product="peroxin pex14"] [strand="+"]	1
pda-miR394a-5p_1ss19CT	PDK_30s846891g001	2.5	16.109	1	20	1320	1339	UUGGCAUUCUGUCCACCUUC	GAAGGAGGACAUAAUGCCAG	Translation	[locus_tag="PDK_30s846891L001"] [product="similar to predicted protein"] [strand="+"]	1
pda-miR394a-5p_1ss19CT	PDK_30s885271g002	3	19.318	1	20	599	618	UUGGCAUUCUGUCCACCUUC	GGUGUUGGACAGGAUGCCAA	Cleavage	[locus_tag="PDK_30s885271L002"] [product="pentatricopeptide repeat-containing"] [strand="+"]	1
pda-miR393a_R+1	PDK_30s803071g001	1	19.518	1	20	1503	1522	UCCAAAGGGAUCGCAUUGAU	AACAAUGCGAUCCCUUUGGA	Cleavage	[locus_tag="PDK_30s803071L001"] [product="transport inhibitor response 1"] [strand="+"]	1
pda-miR393a_R+1	PDK_30s894761g001	2	23.277	1	20	1059	1078	UCCAAAGGGAUCGCAUUGAU	GACAAUGCGAUCCCUUUGGA	Cleavage	[locus_tag="PDK_30s894761L001"] [product="transport inhibitor response 1"] [strand="+"]	1
pda-miR393a_R+1	PDK_30s947241g003	2	22.62	1	20	1221	1240	UCCAAAGGGAUCGCAUUGAU	GACAAUGCGAUCCCUUUGGA	Cleavage	[locus_tag="PDK_30s947241L003"] [product="transport inhibitor response 1"] [strand="+"]	1
pda-miR393a_R+1	PDK_30s1163791g001	3	15.908	1	20	41	60	UCCAAAGGGAUCGCAUUGAU	AUUAAUGCGGUGUCUUUGGG	Translation	[locus_tag="PDK_30s1163791L001"] [product="partial gene, no protein identified"] [strand="-"]	1
pda-miR167a_R+2_1ss21AG	PDK_30s886891g002	3	18.061	1	20	983	1002	UGAAGCUGCCAGCAUGAUCU	AGAUCAUCUUGGUAGCUUUG	Cleavage	[locus_tag="PDK_30s886891L002"] [product="retrotransposon ty3-gypsy subclass"] [strand="-"]	1
pda-miR167a_R+2_1ss21AG	PDK_30s1201081g001	3	14.943	1	21	493	513	UGAAGCUGCCAGCAUGAUCUG	UAUAUUAUCUUGGCAGCUUCA	Cleavage	[locus_tag="PDK_30s1201081L001"] [product="f-box-containing protein 2"] [strand="+"]	1
pda-miR535_L+1	PDK_30s1187081g002	2.5	17.302	1	21	1167	1187	CUGACAACGAGAGAGAGCACG	CUUGUUCUCUCUCAUUGUCAG	Cleavage	[locus_tag="PDK_30s1187081L002"] [product="potassium channel"] [strand="-"]	1
pda-miR535_L+1	PDK_30s764381g004	3	12.596	1	20	265	284	CUGACAACGAGAGAGAGCAC	GUUCUUUAUCUCGUUGUCGG	Cleavage	[locus_tag="PDK_30s764381L004"] [product="r2r3-myb transcriptional factor"] [strand="-"]	1
pda-5p-58294_251	PDK_30s964741g005	3	22.873	1	21	741	761	UCCGUUCGGCACUGGAUCGCC	GGCGAUCCAGGGAUGGACGGA	Translation	[locus_tag="PDK_30s964741L005"] [product="partial gene, no protein identified"] [strand="+"]	1
pda-miR156b	PDK_30s789261g002	2	23.842	1	21	248	268	CUGACAGAAGAUAGAGAGCAC	GUGCUCUCUCUCUUCUGUCAA	Cleavage	[locus_tag="PDK_30s789261L002"] [product="partial gene, no protein identified"] [strand="+"]	1
pda-miR156b	PDK_30s772931g003	2	15.287	1	21	446	466	CUGACAGAAGAUAGAGAGCAC	GUGCUCUCUCUCUUCUGUCAU	Cleavage	[locus_tag="PDK_30s772931L003"] [product="partial gene, no protein identified"] [strand="+"]	1
pda-miR156b	PDK_30s756061g001	2	21.536	1	21	674	694	CUGACAGAAGAUAGAGAGCAC	GUGCUCUCUCUCUUCUGUCAA	Cleavage	[locus_tag="PDK_30s756061L001"] [product="partial gene, no protein identified"] [strand="+"]	1
pda-miR156b	PDK_30s882821g001	2	20.571	1	21	1365	1385	CUGACAGAAGAUAGAGAGCAC	GUGCUCUCUCUCUUCUGUCAA	Cleavage	[locus_tag="PDK_30s882821L001"] [product="partial gene, no protein identified"] [strand="+"]	1
pda-miR156b	PDK_30s670584g001	3	21.572	1	21	386	406	CUGACAGAAGAUAGAGAGCAC	GUGCUUCCUAUUUUCUGUCAA	Cleavage	[locus_tag="PDK_30s670584L001"] [product="3-hydroxyisobutyryl-coenzyme a expressed"] [strand="+"]	1
pda-miR156b	PDK_30s1020031g001	3	9.892	1	21	2992	3012	CUGACAGAAGAUAGAGAGCAC	GAGCUCUCUUUCUUCUGUCAC	Cleavage	[locus_tag="PDK_30s1020031L001"] [product="partial gene, no protein identified"] [strand="-"]	1
pda-miR156b	PDK_30s1211281g004	3	17.126	1	20	252	270	CUGACAGAAGAUAGAGAGCA	CGCUCUCUAUCU-CUGUCAG	Cleavage	[locus_tag="PDK_30s1211281L004"] [product="wall-associated kinase 4-like"] [strand="-"]	1
pda-5p-92754_121	PDK_30s6550950g002	3	16.773	1	23	1066	1088	CGUGUUCAGCAAGCUCUGGGACC	GGAUUCAGAGCUUGUUGAAGACG	Cleavage	[locus_tag="PDK_30s6550950L002"] [product="transfactor-like protein"] [strand="-"]	1
pda-5p-92754_121	PDK_30s1075481g001	3	18.919	1	21	1616	1636	CGUGUUCAGCAAGCUCUGGGA	UUCCAGAGGUUGCUGAAUACU	Cleavage	[locus_tag="PDK_30s1075481L001"] [product="gtp-binding protein alpha"] [strand="+"]	1
pda-5p-92754_121	PDK_30s655081g013	3	17.456	1	20	1693	1712	CGUGUUCAGCAAGCUCUGGG	UCCAGGGCUUGCUGAACCUG	Cleavage	[locus_tag="PDK_30s655081L013"] [product="white-brown-complex abc transporter family"] [strand="-"]	1
pda-5p-85614_137-R2	PDK_30s760481g002	3	23.808	1	22	161	182	AGCUCCCUUGCCAGCUUUAGCC	GGAUGAAGCUGGGGAGGGAGCU	Translation	[locus_tag="PDK_30s760481L002"] [product="partial gene, no protein identified"] [strand="-"]	1
pda-3p-64863_213	PDK_30s1078311g009	3	21.85	1	20	325	344	UCUAUUCAAACAUUGACUGC	GCUGUUGAUGUUUGGAUGGA	Cleavage	[locus_tag="PDK_30s1078311L009"] [product="similar to predicted protein"] [strand="-"]	1
pda-miR156a_L+1R-1	PDK_30s789261g002	2	23.842	1	20	249	268	CUGACAGAAGAGAGUGAGCA	UGCUCUCUCUCUUCUGUCAA	Cleavage	[locus_tag="PDK_30s789261L002"] [product="partial gene, no protein identified"] [strand="+"]	1
pda-miR156a_L+1R-1	PDK_30s772931g003	2	15.287	1	20	447	466	CUGACAGAAGAGAGUGAGCA	UGCUCUCUCUCUUCUGUCAU	Cleavage	[locus_tag="PDK_30s772931L003"] [product="partial gene, no protein identified"] [strand="+"]	1
pda-miR156a_L+1R-1	PDK_30s756061g001	2	21.536	1	20	675	694	CUGACAGAAGAGAGUGAGCA	UGCUCUCUCUCUUCUGUCAA	Cleavage	[locus_tag="PDK_30s756061L001"] [product="partial gene, no protein identified"] [strand="+"]	1
pda-miR156a_L+1R-1	PDK_30s882821g001	2	20.571	1	20	1366	1385	CUGACAGAAGAGAGUGAGCA	UGCUCUCUCUCUUCUGUCAA	Cleavage	[locus_tag="PDK_30s882821L001"] [product="partial gene, no protein identified"] [strand="+"]	1
pda-miR156a_L+1R-1	PDK_30s940711g002	3	18.089	1	20	401	420	CUGACAGAAGAGAGUGAGCA	UGUUCACUGUCUUCUGUCUG	Cleavage	[locus_tag="PDK_30s940711L002"] [product="harpin-induced protein"] [strand="+"]	1
pda-miR169l-3p_2ss2GC13TC	PDK_30s700731g002	3	16.842	1	21	224	244	CCGGCAAGUUGUCUUUGGCUA	UGGCCAAAGACCACUUGUCGC	Translation	[locus_tag="PDK_30s700731L002"] [product="small heat-shock"] [strand="+"]	1
pda-miR169l-3p_2ss2GC13TC	PDK_30s1202711g001	3	17.08	1	22	37	58	CCGGCAAGUUGUCUUUGGCUAC	GAAGCGGAAGAUGACUUGCUGG	Cleavage	[locus_tag="PDK_30s1202711L001"] [product="receptor-like protein kinase"] [strand="-"]	1
pda-miR156h-p3	PDK_30s680571g004	2.5	17.671	1	20	1	20	GCUCUCUAUGCUUCUGUCAU	AUGGCAGAAGCAAAGGGAGU	Cleavage	[locus_tag="PDK_30s680571L004"] [product="partial gene, no protein identified"] [strand="+"]	1
pda-miR156h-p3	PDK_30s687201g002	3	17.25	1	21	1933	1953	GCUCUCUAUGCUUCUGUCAUC	GAUGAUAUAGUCAUAGAGAGC	Translation	[locus_tag="PDK_30s687201L002"] [product="partial gene, no protein identified"] [strand="+"]	1
pda-miR156h-p3	PDK_30s1169121g004	2.5	9.512	1	20	979	998	GCUCUCUAUGCUUCUGUCAU	AUGACAGAAGAACGGAGAGC	Translation	[locus_tag="PDK_30s1169121L004"] [product="high mobility group family"] [strand="+"]	1
pda-miR156h-p3	PDK_30s951441g001	3	16.772	1	21	296	315	GCUCUCUAUGCUUCUGUCAUC	GAUGACAGAAG-AGAGAGAGC	Translation	[locus_tag="PDK_30s951441L001"] [product="partial gene, no protein identified"] [strand="-"]	1
pda-miR156h-p3	PDK_30s1139181g002	3	21.49	1	21	302	321	GCUCUCUAUGCUUCUGUCAUC	GAUGACAGAAG-AGAGAGAGC	Translation	[locus_tag="PDK_30s1139181L002"] [product="partial gene, no protein identified"] [strand="-"]	1
pda-3p-93572_119	PDK_30s777881g001	3	16.322	1	20	472	491	CCUGUGCAUGCCUCCUCCAC	GUGGCGGAGGCAUGCGAAGG	Cleavage	[locus_tag="PDK_30s777881L001"] [product="mip nip subfamily"] [strand="-"]	1
pda-3p-93572_119	PDK_30s783041g014	3	21.495	1	21	1386	1405	CCUGUGCAUGCCUCCUCCACC	GGUGGAGGUGG-AUGCACAGG	Translation	[locus_tag="PDK_30s783041L014"] [product="similar to predicted protein"] [strand="+"]	1
pda-miR2916_R-3_1ss6AG	PDK_30s1122501g006	2.5	20.719	1	20	795	814	UGGGGGCUCGAAGACGAUCA	UGGUAGUCGUCGAGCCCCCA	Cleavage	[locus_tag="PDK_30s1122501L006"] [product="leucine rich repeat family expressed"] [strand="-"]	1
pda-miR2916_R-3_1ss6AG	PDK_30s727661g002	3	20.945	1	20	768	788	UGGGGGCUCG-AAGACGAUCA	UGAUUGUCUUAUGAGCCCCCA	Translation	[locus_tag="PDK_30s727661L002"] [product="similar to predicted protein"] [strand="+"]	1
pda-miR2916_R-3_1ss6AG	PDK_30s745441g001	3	17.009	1	20	935	954	UGGGGGCUCGAAGACGAUCA	UGAUGGUCAUCGAGCCUUCA	Cleavage	[locus_tag="PDK_30s745441L001"] [product="secondary cell wall-related glycosyltransferasefamily 8"] [strand="+"]	1
pda-miR2916_R-3_1ss6AG	PDK_30s6550926g026	3	17.233	1	20	440	459	UGGGGGCUCGAAGACGAUCA	UUAUCGUCUUCAAGCUUCCA	Translation	[locus_tag="PDK_30s6550926L026"] [product="nucleic acid binding"] [strand="-"]	1
pda-miR2916_R-3_1ss6AG	PDK_30s1141531g001	3	21.259	1	20	80	99	UGGGGGCUCGAAGACGAUCA	UGAGUGUCGUCGAGCUCCCA	Cleavage	[locus_tag="PDK_30s1141531L001"] [product="partial gene, no protein identified"] [strand="+"]	1
pda-miR395_R-1_1ss14AG	PDK_30s986061g002	2	20.774	1	20	128	147	CUGAAGUGUUUGGGGGAACU	AGUUCCUCCAAGCACUUCAU	Cleavage	[locus_tag="PDK_30s986061L002"] [product="atp sulfurylase"] [strand="+"]	1
pda-miR395_R-1_1ss14AG	PDK_30s804591g003	3	12.168	1	20	2394	2413	CUGAAGUGUUUGGGGGAACU	AGUUCCCCCAGACCCUUCAU	Cleavage	[locus_tag="PDK_30s804591L003"] [product="brassinosteroid insensitive 1-associatedreceptor kinase 1"] [strand="+"]	1
pda-miR395_R-1_1ss14AG	PDK_30s1028201g011	2.5	19.246	1	20	1459	1478	CUGAAGUGUUUGGGGGAACU	GGUUCCACCAAACACUUCAA	Cleavage	[locus_tag="PDK_30s1028201L011"] [product="fkbp-rapamycin associated"] [strand="-"]	1
pda-miR395_R-1_1ss14AG	PDK_30s1186971g003	2.5	15.118	1	20	1756	1775	CUGAAGUGUUUGGGGGAACU	AGUUCCCCCAGAAGCUUUAG	Cleavage	[locus_tag="PDK_30s1186971L003"] [product="atp-dependent dna helicase"] [strand="-"]	1
pda-miR395_R-1_1ss14AG	PDK_30s1127011g012	3	18.604	1	20	31	50	CUGAAGUGUUUGGGGGAACU	AUUUCCCUCAAACACAUCAG	Cleavage	[locus_tag="PDK_30s1127011L012"] [product="similar to predicted protein"] [strand="-"]	1
pda-miR395_R-1_1ss14AG	PDK_30s829431g003	3	7.735	1	20	1426	1445	CUGAAGUGUUUGGGGGAACU	AUUUUUUCCAAACAUUUCAG	Cleavage	[locus_tag="PDK_30s829431L003"] [product="atp binding"] [strand="-"]	1
pda-3p-8373_3137	PDK_30s990651g001	2.5	14.827	1	20	2398	2417	CUGUAAACCGCACGACCCUU	UGGGGUCGUGCGGUUUACAU	Cleavage	[locus_tag="PDK_30s990651L001"] [product="autoinhibited calcium atpase"] [strand="+"]	1
pda-miR156i-3p_2ss7CT22TG	PDK_30s675031g001	2.5	10.823	1	21	719	739	UGCUCAUUUCUCUUUCUGUCA	UAACAGAAAGAGAAAUCAGCA	Cleavage	[locus_tag="PDK_30s675031L001"] [product="partial gene, no protein identified"] [strand="+"]	1
pda-miR156i-3p_2ss7CT22TG	PDK_30s724031g001	3	6.053	1	22	497	518	UGCUCAUUUCUCUUUCUGUCAG	UUGAUAGAAAGAAAAAUGAGAA	Translation	[locus_tag="PDK_30s724031L001"] [product="coatomer delta subunit (delta-coat protein)(delta-cop)"] [strand="+"]	1
pda-miR156i-3p_2ss7CT22TG	PDK_30s740851g001	2.5	19.723	1	20	563	582	UGCUCAUUUCUCUUUCUGUC	GGCAGAAGGGGAAGUGGGCA	Cleavage	[locus_tag="PDK_30s740851L001"] [product="partial gene, no protein identified"] [strand="+"]	1
pda-miR156i-3p_2ss7CT22TG	PDK_30s1155291g001	3	15.936	1	20	1269	1288	UGCUCAUUUCUCUUUCUGUC	GACAGAAAGAGAAAUCAGAA	Cleavage	[locus_tag="PDK_30s1155291L001"] [product="protein kinase"] [strand="-"]	1
pda-miR156i-3p_2ss7CT22TG	PDK_30s955761g002	3	11.446	1	20	145	164	UGCUCAUUUCUCUUUCUGUC	GAUGGAAAGGGAACUGAGCA	Cleavage	[locus_tag="PDK_30s955761L002"] [product="similar to predicted protein"] [strand="+"]	1
pda-miR156i-3p_2ss7CT22TG	PDK_30s1027821g004	3	15.745	1	20	757	776	UGCUCAUUUCUCUUUCUGUC	GACAGGAGGAGAAGGGAGCA	Cleavage	[locus_tag="PDK_30s1027821L004"] [product="similar to predicted protein"] [strand="+"]	1
pda-miR156i-3p_2ss7CT22TG	PDK_30s938531g001	2.5	13.886	1	20	280	299	UGCUCAUUUCUCUUUCUGUC	GGUAGGAUGAGAAAUGAGCA	Cleavage	[locus_tag="PDK_30s938531L001"] [product="partial gene, no protein identified"] [strand="+"]	1
pda-miR156i-3p_2ss7CT22TG	PDK_30s978251g001	2.5	9.717	1	20	183	202	UGCUCAUUUCUCUUUCUGUC	GAAGGAAAGGGAAGUGAGCA	Cleavage	[locus_tag="PDK_30s978251L001"] [product="similar to predicted protein"] [strand="+"]	1
pda-3p-35797_519	PDK_30s948721g001	3	21.067	1	24	1857	1880	ACCCUUGUUUUGAAUGUCUGAAGG	CCGUCAGAUAUCCGGAGCAAGGGU	Cleavage	[locus_tag="PDK_30s948721L001"] [product="kh domain containing expressed"] [strand="+"]	1
pda-3p-35797_519	PDK_30s708731g003	3	12.541	1	23	615	636	ACCCUUGUUUUGAAUGUCUGAAG	CUUCAGA-GUUCAGAACAAGGGU	Cleavage	[locus_tag="PDK_30s708731L003"] [product="inositolphosphorylceramide-b c-26 hydroxylase"] [strand="+"]	1
pda-3p-35797_519	PDK_30s1155431g001	3	15.807	1	24	590	613	ACCCUUGUUUUGAAUGUCUGAAGG	UCUCCAGGGGUUCAAAACAAGGGA	Cleavage	[locus_tag="PDK_30s1155431L001"] [product="similar to predicted protein"] [strand="+"]	1
pda-3p-35797_519	PDK_30s665281g001	3	22.629	1	20	64	83	ACCCUUGUUUUGAAUGUCUG	AAGACAUUCGAGACAAGGGA	Cleavage	[locus_tag="PDK_30s665281L001"] [product="aldehyde dehydrogenase"] [strand="+"]	1
pda-3p-35797_519	PDK_30s957931g002	3	20.265	1	21	382	402	ACCCUUGUUUUGAAUGUCUGA	UCCGAUAUCCAAAACAGGGGU	Cleavage	[locus_tag="PDK_30s957931L002"] [product="flavine-containing monoxygenase"] [strand="-"]	1
pda-5p-37236_491	PDK_30s1119371g001	3	20.65	1	22	686	707	ACUUCGAGUAGGAUUCCUAGAG	CGUUAGGAGACCUCCUCGAAGU	Translation	[locus_tag="PDK_30s1119371L001"] [product="cellulose synthase-like protein"] [strand="-"]	1
pda-5p-61161_232	PDK_30s1087351g002	3	20.182	1	19	522	541	UCAGGAGAGAUG-ACACCGG	CCGGUGUUCGUCUCUCUUGA	Cleavage	[locus_tag="PDK_30s1087351L002"] [product="pp315_arath ame: full=pentatricopeptiderepeat-containing protein at4g16470"] [strand="-"]	1
pda-5p-15197_1588	PDK_30s65509484g003	2.5	13.79	1	20	291	310	UCACAGGCUUUCUUGAACUA	CCGUUCAAGAAAGCCUGUGG	Cleavage	[locus_tag="PDK_30s65509484L003"] [product="growth-regulating factor 1"] [strand="+"]	1
pda-5p-15197_1588	PDK_30s1085001g001	2.5	17.242	1	20	377	396	UCACAGGCUUUCUUGAACUA	CCGUUCAAGAAAGCCUGUGG	Cleavage	[locus_tag="PDK_30s1085001L001"] [product="growth-regulating factor 3"] [strand="+"]	1
pda-5p-15197_1588	PDK_30s65509404g002	2.5	16.994	1	20	234	253	UCACAGGCUUUCUUGAACUA	CCGUUCAAGAAAGCCUGUGG	Cleavage	[locus_tag="PDK_30s65509404L002"] [product="growth-regulating factor 1"] [strand="+"]	1
pda-5p-15197_1588	PDK_30s922211g002	3	21.631	1	20	789	808	UCACAGGCUUUCUUGAACUA	UCGUUCAAGAAAGCAUGUGG	Cleavage	[locus_tag="PDK_30s922211L002"] [product="growth-regulating factor 1"] [strand="+"]	1
pda-5p-15197_1588	PDK_30s938881g003	3	21.107	1	20	516	535	UCACAGGCUUUCUUGAACUA	UGGUUCGGAGAAGCCUGUGA	Cleavage	[locus_tag="PDK_30s938881L003"] [product="similar to predicted protein"] [strand="+"]	1
pda-5p-15197_1588	PDK_30s739481g001	2.5	20.452	1	19	30	49	UCACAGGCUUUCUUG-AACU	AGUUGCAAGAAAGCCUGUGG	Cleavage	[locus_tag="PDK_30s739481L001"] [product="partial gene, no protein identified"] [strand="+"]	1
pda-miR529e_1ss21CT	PDK_30s756061g001	1.5	16.372	1	20	670	689	AGAAGAGAGAGAGUACAGCC	AGCUGUGCUCUCUCUCUUCU	Cleavage	[locus_tag="PDK_30s756061L001"] [product="partial gene, no protein identified"] [strand="+"]	1
pda-miR529e_1ss21CT	PDK_30s704101g001	2.5	17.648	1	20	213	232	AGAAGAGAGAGAGUACAGCC	AGCUGUGCUCUCUCUCUUCG	Cleavage	[locus_tag="PDK_30s704101L001"] [product="partial gene, no protein identified"] [strand="-"]	1
pda-miR529e_1ss21CT	PDK_30s772931g003	2	13.697	1	20	442	461	AGAAGAGAGAGAGUACAGCC	GAUUGUGCUCUCUCUCUUCU	Cleavage	[locus_tag="PDK_30s772931L003"] [product="partial gene, no protein identified"] [strand="+"]	1
pda-miR529e_1ss21CT	PDK_30s774191g002	2.5	20.457	1	20	1242	1261	AGAAGAGAGAGAGUACAGCC	GGUUGAACUCUCUCUCUUCA	Cleavage	[locus_tag="PDK_30s774191L002"] [product="abscisic acid responsive elements-bindingfactor"] [strand="-"]	1
pda-miR529e_1ss21CT	PDK_30s1025931g001	3	21.478	1	21	587	607	AGAAGAGAGAGAGUACAGCCU	AGGCCGUGCUCUUCCUCUUCU	Cleavage	[locus_tag="PDK_30s1025931L001"] [product="partial gene, no protein identified"] [strand="+"]	1
pda-miR529e_1ss21CT	PDK_30s905141g003	3	17.681	1	21	1917	1937	AGAAGAGAGAGAGUACAGCCU	AGGCUGAACUCGCUUUCUUUU	Translation	[locus_tag="PDK_30s905141L003"] [product="partial gene, no protein identified"] [strand="-"]	1
pda-miR529e_1ss21CT	PDK_30s821841g002	3	19.167	1	21	181	200	AGAAGAGAGAGAGUACAGCCU	AGGCUCUA-UCUCUCUCUUCU	Cleavage	[locus_tag="PDK_30s821841L002"] [product="partial gene, no protein identified"] [strand="-"]	1
pda-3p-21009_1073	PDK_30s915331g005	3	15.97	1	21	195	215	UCUGUCCGGCACUGUUCAGCC	GGUUGAAUAGUGUUGGACAGU	Cleavage	[locus_tag="PDK_30s915331L005"] [product="partial gene, no protein identified"] [strand="-"]	1
pda-3p-21009_1073	PDK_30s1009331g001	3	23.625	1	21	647	667	UCUGUCCGGCACUGUUCAGCC	GGCUGAUCGGUGAUGGACAGA	Translation	[locus_tag="PDK_30s1009331L001"] [product="partial gene, no protein identified"] [strand="+"]	1
pda-3p-21009_1073	PDK_30s736461g001	3	19.35	1	21	272	292	UCUGUCCGGCACUGUUCAGCC	GGCUGAUCAGUGAUGGACGGA	Translation	[locus_tag="PDK_30s736461L001"] [product="partial gene, no protein identified"] [strand="+"]	1
pda-miR166b-p3	PDK_30s729201g002	2.5	18.53	1	20	645	664	UCUCGGACCAGGCUUCAUUC	GGAUGAAGCCGGGUUCGAGG	Translation	[locus_tag="PDK_30s729201L002"] [product="zinc finger cchc-type and rna binding motif 1"] [strand="+"]	1
pda-miR166b-p3	PDK_30s745201g003	2.5	24.112	1	20	1562	1581	UCUCGGACCAGGCUUCAUUC	GAAGAGAGCCUGGUCCGAGA	Cleavage	[locus_tag="PDK_30s745201L003"] [product="endonuclease iii homologue"] [strand="-"]	1
pda-miR393a_R+1_1ss21CT	PDK_30s803071g001	1	19.518	1	22	1501	1522	UCCAAAGGGAUCGCAUUGAUUU	GAAACAAUGCGAUCCCUUUGGA	Cleavage	[locus_tag="PDK_30s803071L001"] [product="transport inhibitor response 1"] [strand="+"]	1
pda-miR393a_R+1_1ss21CT	PDK_30s894761g001	1.5	23.277	1	22	1057	1078	UCCAAAGGGAUCGCAUUGAUUU	GAGACAAUGCGAUCCCUUUGGA	Cleavage	[locus_tag="PDK_30s894761L001"] [product="transport inhibitor response 1"] [strand="+"]	1
pda-miR393a_R+1_1ss21CT	PDK_30s947241g003	2	22.62	1	20	1221	1240	UCCAAAGGGAUCGCAUUGAU	GACAAUGCGAUCCCUUUGGA	Cleavage	[locus_tag="PDK_30s947241L003"] [product="transport inhibitor response 1"] [strand="+"]	1
pda-miR393a_R+1_1ss21CT	PDK_30s1163791g001	3	15.908	1	20	41	60	UCCAAAGGGAUCGCAUUGAU	AUUAAUGCGGUGUCUUUGGG	Translation	[locus_tag="PDK_30s1163791L001"] [product="partial gene, no protein identified"] [strand="-"]	1
pda-miR396	PDK_30s687611g004	3	14.602	1	21	124	144	UUCCACAGCUUUCUUGAACUU	GAAUUCGAGAAAGUUGUGGAC	Cleavage	[locus_tag="PDK_30s687611L004"] [product="partial gene, no protein identified"] [strand="+"]	1
pda-miR396	PDK_30s783481g001	3	23.692	1	21	163	183	UUCCACAGCUUUCUUGAACUU	AAGCUGAAGGAAGCUGUGGAG	Cleavage	[locus_tag="PDK_30s783481L001"] [product="pentatricopeptide repeat-containing"] [strand="+"]	1
pda-miR396	PDK_30s1060371g001	3	15.04	1	21	211	231	UUCCACAGCUUUCUUGAACUU	GAGUUCAAGAAAAUUAUGGAA	Translation	[locus_tag="PDK_30s1060371L001"] [product="partial gene, no protein identified"] [strand="+"]	1
pda-miR396	PDK_30s65509404g002	2	17.792	1	19	236	255	UUCCACA-GCUUUCUUGAAC	GUUCAAGAAAGCCUGUGGAA	Cleavage	[locus_tag="PDK_30s65509404L002"] [product="growth-regulating factor 1"] [strand="+"]	1
pda-miR396	PDK_30s1085001g001	2	17.378	1	19	379	398	UUCCACA-GCUUUCUUGAAC	GUUCAAGAAAGCCUGUGGAA	Cleavage	[locus_tag="PDK_30s1085001L001"] [product="growth-regulating factor 3"] [strand="+"]	1
pda-miR396	PDK_30s65509484g003	2	13.606	1	19	293	312	UUCCACA-GCUUUCUUGAAC	GUUCAAGAAAGCCUGUGGAA	Cleavage	[locus_tag="PDK_30s65509484L003"] [product="growth-regulating factor 1"] [strand="+"]	1
pda-miR396	PDK_30s922211g002	2	21.657	1	19	791	810	UUCCACA-GCUUUCUUGAAC	GUUCAAGAAAGCAUGUGGAA	Cleavage	[locus_tag="PDK_30s922211L002"] [product="growth-regulating factor 1"] [strand="+"]	1
pda-miR396_R-1_1ss7AG	PDK_30s1057761g004	2.5	13.707	1	20	38	57	UUCCACGGCUUUCUUGAACU	AGUUCAAGAAAGCCAUGGAU	Cleavage	[locus_tag="PDK_30s1057761L004"] [product="partial gene, no protein identified"] [strand="+"]	1
pda-miR396_R-1_1ss7AG	PDK_30s1096111g002	3	15.765	1	20	227	246	UUCCACGGCUUUCUUGAACU	AGUUCAAGGAUGUCGUGGAU	Translation	[locus_tag="PDK_30s1096111L002"] [product="1 domain containing expressed"] [strand="+"]	1
pda-miR396_R-1_1ss7AG	PDK_30s65509404g002	2.5	17.792	1	19	236	255	UUCCAC-GGCUUUCUUGAAC	GUUCAAGAAAGCCUGUGGAA	Cleavage	[locus_tag="PDK_30s65509404L002"] [product="growth-regulating factor 1"] [strand="+"]	1
pda-miR396_R-1_1ss7AG	PDK_30s1085001g001	2.5	17.378	1	19	379	398	UUCCAC-GGCUUUCUUGAAC	GUUCAAGAAAGCCUGUGGAA	Cleavage	[locus_tag="PDK_30s1085001L001"] [product="growth-regulating factor 3"] [strand="+"]	1
pda-miR396_R-1_1ss7AG	PDK_30s65509484g003	2.5	13.606	1	19	293	312	UUCCAC-GGCUUUCUUGAAC	GUUCAAGAAAGCCUGUGGAA	Cleavage	[locus_tag="PDK_30s65509484L003"] [product="growth-regulating factor 1"] [strand="+"]	1
pda-miR396_R-1_1ss7AG	PDK_30s922211g002	2.5	21.657	1	19	791	810	UUCCACG-GCUUUCUUGAAC	GUUCAAGAAAGCAUGUGGAA	Cleavage	[locus_tag="PDK_30s922211L002"] [product="growth-regulating factor 1"] [strand="+"]	1
pda-miR166a_R-1	PDK_30s693742g001	2	23.664	1	20	591	610	UCGGACCAGGCUUCAUUCCC	UGGGAUGAAGCCUGGUCCGG	Cleavage	[locus_tag="PDK_30s693742L001"] [product="homeodomain-leucine zipper trancription factorhb-3"] [strand="+"]	1
pda-miR166a_R-1	PDK_30s929391g001	2	20.984	1	20	492	511	UCGGACCAGGCUUCAUUCCC	UGGGAUGAAGCCUGGUCCGG	Cleavage	[locus_tag="PDK_30s929391L001"] [product="rolled expressed"] [strand="+"]	1
pda-miR166a_R-1	PDK_30s729201g002	2	16.83	1	20	643	662	UCGGACCAGGCUUCAUUCCC	GGGGAUGAAGCCGGGUUCGA	Cleavage	[locus_tag="PDK_30s729201L002"] [product="zinc finger cchc-type and rna binding motif 1"] [strand="+"]	1
pda-miR166a_R-1	PDK_30s764871g001	2.5	20.248	1	20	1372	1391	UCGGACCAGGCUUCAUUCCC	GGGAAUGGUGCCUGGUCCGC	Cleavage	[locus_tag="PDK_30s764871L001"] [product="partial gene, no protein identified"] [strand="+"]	1
pda-miR166a_R-1	PDK_30s745201g003	2.5	22.028	1	20	1560	1579	UCGGACCAGGCUUCAUUCCC	GGGAAGAGAGCCUGGUCCGA	Cleavage	[locus_tag="PDK_30s745201L003"] [product="endonuclease iii homologue"] [strand="-"]	1
pda-miR166i-3p_L+2R-2	PDK_30s729201g002	3	18.53	1	21	644	664	UCUCGGAUCAGGCUUCAUUCC	GGGAUGAAGCCGGGUUCGAGG	Translation	[locus_tag="PDK_30s729201L002"] [product="zinc finger cchc-type and rna binding motif 1"] [strand="+"]	1
pda-miR166i-3p_L+2R-2	PDK_30s745201g003	3	24.112	1	21	1561	1581	UCUCGGAUCAGGCUUCAUUCC	GGAAGAGAGCCUGGUCCGAGA	Cleavage	[locus_tag="PDK_30s745201L003"] [product="endonuclease iii homologue"] [strand="-"]	1
pda-miR162_1ss20AG	PDK_30s1006931g001	2.5	19.003	1	21	1476	1496	UCGAUAAACCUCUGCAUCCGG	UCAGAUGCAGAGGUUCAUCGA	Cleavage	[locus_tag="PDK_30s1006931L001"] [product="similar to predicted protein"] [strand="+"]	1
pda-5p-5696_4736	PDK_30s656941g003	3	22.358	1	20	2510	2529	CAAGGGAAGUCGGCAAAACG	GGAUUUGCCGACUUCUUUUG	Cleavage	[locus_tag="PDK_30s656941L003"] [product="partial gene, no protein identified"] [strand="-"]	1
pda-5p-5696_4736	PDK_30s693381g001	3	13.485	1	20	563	582	CAAGGGAAGUCGGCAAAACG	CGUUUCACCGGCUUCUCUUG	Cleavage	[locus_tag="PDK_30s693381L001"] [product="vacuolar protein sorting"] [strand="+"]	1
pda-miR535	PDK_30s1187081g002	3	17.049	1	20	1167	1186	UGACAACGAGAGAGAGCACG	CUUGUUCUCUCUCAUUGUCA	Cleavage	[locus_tag="PDK_30s1187081L002"] [product="potassium channel"] [strand="-"]	1
pda-miR535	PDK_30s1105251g001	3	13.652	1	20	2472	2491	UGACAACGAGAGAGAGCACG	UGUGGUCGCUCUCGUUGUUA	Cleavage	[locus_tag="PDK_30s1105251L001"] [product="plasma membrane-type calcium atpase"] [strand="+"]	1
pda-miR167c_R+1	PDK_30s886891g002	3	18.061	1	20	983	1002	UGAAGCUGCCAGCAUGAUCU	AGAUCAUCUUGGUAGCUUUG	Cleavage	[locus_tag="PDK_30s886891L002"] [product="retrotransposon ty3-gypsy subclass"] [strand="-"]	1
pda-miR167c_R+1	PDK_30s1201081g001	3	14.943	1	21	493	513	UGAAGCUGCCAGCAUGAUCUG	UAUAUUAUCUUGGCAGCUUCA	Cleavage	[locus_tag="PDK_30s1201081L001"] [product="f-box-containing protein 2"] [strand="+"]	1
pda-miR167c_R+1	PDK_30s868111g005	3	17.131	1	20	2699	2718	UGAAGCUGCCAGCAUGAUCU	AGAUCAUGUCGGGAGCUUCG	Translation	[locus_tag="PDK_30s868111L005"] [product="similar to predicted protein"] [strand="-"]	1
pda-miR156e	PDK_30s789261g002	1	23.842	1	21	248	268	UUGACAGAAGAUAGAGAGCAC	GUGCUCUCUCUCUUCUGUCAA	Cleavage	[locus_tag="PDK_30s789261L002"] [product="partial gene, no protein identified"] [strand="+"]	1
pda-miR156e	PDK_30s756061g001	1	21.536	1	21	674	694	UUGACAGAAGAUAGAGAGCAC	GUGCUCUCUCUCUUCUGUCAA	Cleavage	[locus_tag="PDK_30s756061L001"] [product="partial gene, no protein identified"] [strand="+"]	1
pda-miR156e	PDK_30s882821g001	1	20.571	1	21	1365	1385	UUGACAGAAGAUAGAGAGCAC	GUGCUCUCUCUCUUCUGUCAA	Cleavage	[locus_tag="PDK_30s882821L001"] [product="partial gene, no protein identified"] [strand="+"]	1
pda-miR156e	PDK_30s772931g003	2	15.287	1	21	446	466	UUGACAGAAGAUAGAGAGCAC	GUGCUCUCUCUCUUCUGUCAU	Cleavage	[locus_tag="PDK_30s772931L003"] [product="partial gene, no protein identified"] [strand="+"]	1
pda-miR156e	PDK_30s670584g001	2	21.572	1	21	386	406	UUGACAGAAGAUAGAGAGCAC	GUGCUUCCUAUUUUCUGUCAA	Cleavage	[locus_tag="PDK_30s670584L001"] [product="3-hydroxyisobutyryl-coenzyme a expressed"] [strand="+"]	1
pda-miR156e	PDK_30s704101g001	2.5	17.093	1	21	217	237	UUGACAGAAGAUAGAGAGCAC	GUGCUCUCUCUCUUCGGUCAA	Cleavage	[locus_tag="PDK_30s704101L001"] [product="partial gene, no protein identified"] [strand="-"]	1
pda-miR156e	PDK_30s1020031g001	3	9.892	1	21	2992	3012	UUGACAGAAGAUAGAGAGCAC	GAGCUCUCUUUCUUCUGUCAC	Cleavage	[locus_tag="PDK_30s1020031L001"] [product="partial gene, no protein identified"] [strand="-"]	1
pda-miR156e	PDK_30s1172771g001	3	17.634	1	20	1562	1581	UUGACAGAAGAUAGAGAGCA	AGCUCUCUAUAUGCUGUCAA	Translation	[locus_tag="PDK_30s1172771L001"] [product="dna topoisomerase i"] [strand="+"]	1
pda-miR156a_L+1	PDK_30s789261g002	2	23.842	1	21	248	268	CUGACAGAAGAGAGUGAGCAC	GUGCUCUCUCUCUUCUGUCAA	Cleavage	[locus_tag="PDK_30s789261L002"] [product="partial gene, no protein identified"] [strand="+"]	1
pda-miR156a_L+1	PDK_30s772931g003	2	15.287	1	21	446	466	CUGACAGAAGAGAGUGAGCAC	GUGCUCUCUCUCUUCUGUCAU	Cleavage	[locus_tag="PDK_30s772931L003"] [product="partial gene, no protein identified"] [strand="+"]	1
pda-miR156a_L+1	PDK_30s756061g001	2	21.536	1	21	674	694	CUGACAGAAGAGAGUGAGCAC	GUGCUCUCUCUCUUCUGUCAA	Cleavage	[locus_tag="PDK_30s756061L001"] [product="partial gene, no protein identified"] [strand="+"]	1
pda-miR156a_L+1	PDK_30s882821g001	2	20.571	1	21	1365	1385	CUGACAGAAGAGAGUGAGCAC	GUGCUCUCUCUCUUCUGUCAA	Cleavage	[locus_tag="PDK_30s882821L001"] [product="partial gene, no protein identified"] [strand="+"]	1
pda-miR156a_L+1	PDK_30s940711g002	3	18.089	1	20	401	420	CUGACAGAAGAGAGUGAGCA	UGUUCACUGUCUUCUGUCUG	Cleavage	[locus_tag="PDK_30s940711L002"] [product="harpin-induced protein"] [strand="+"]	1
pda-miR156h	PDK_30s789261g002	1	23.842	1	21	248	268	UUGACAGAAGAUAGAGAGCAC	GUGCUCUCUCUCUUCUGUCAA	Cleavage	[locus_tag="PDK_30s789261L002"] [product="partial gene, no protein identified"] [strand="+"]	1
pda-miR156h	PDK_30s756061g001	1	21.536	1	21	674	694	UUGACAGAAGAUAGAGAGCAC	GUGCUCUCUCUCUUCUGUCAA	Cleavage	[locus_tag="PDK_30s756061L001"] [product="partial gene, no protein identified"] [strand="+"]	1
pda-miR156h	PDK_30s882821g001	1	20.571	1	21	1365	1385	UUGACAGAAGAUAGAGAGCAC	GUGCUCUCUCUCUUCUGUCAA	Cleavage	[locus_tag="PDK_30s882821L001"] [product="partial gene, no protein identified"] [strand="+"]	1
pda-miR156h	PDK_30s772931g003	2	15.287	1	21	446	466	UUGACAGAAGAUAGAGAGCAC	GUGCUCUCUCUCUUCUGUCAU	Cleavage	[locus_tag="PDK_30s772931L003"] [product="partial gene, no protein identified"] [strand="+"]	1
pda-miR156h	PDK_30s670584g001	2	21.572	1	21	386	406	UUGACAGAAGAUAGAGAGCAC	GUGCUUCCUAUUUUCUGUCAA	Cleavage	[locus_tag="PDK_30s670584L001"] [product="3-hydroxyisobutyryl-coenzyme a expressed"] [strand="+"]	1
pda-miR156h	PDK_30s704101g001	2.5	17.093	1	21	217	237	UUGACAGAAGAUAGAGAGCAC	GUGCUCUCUCUCUUCGGUCAA	Cleavage	[locus_tag="PDK_30s704101L001"] [product="partial gene, no protein identified"] [strand="-"]	1
pda-miR156h	PDK_30s1020031g001	3	9.892	1	21	2992	3012	UUGACAGAAGAUAGAGAGCAC	GAGCUCUCUUUCUUCUGUCAC	Cleavage	[locus_tag="PDK_30s1020031L001"] [product="partial gene, no protein identified"] [strand="-"]	1
pda-miR156h	PDK_30s1172771g001	3	17.634	1	20	1562	1581	UUGACAGAAGAUAGAGAGCA	AGCUCUCUAUAUGCUGUCAA	Translation	[locus_tag="PDK_30s1172771L001"] [product="dna topoisomerase i"] [strand="+"]	1
pda-5p-2741_10004	PDK_30s1039241g001	3	15.518	1	23	3991	4013	GGGAUGGGGCUGGUUUGGAAAAC	GUUUUCCAAGCAAGUUUCAUCCC	Cleavage	[locus_tag="PDK_30s1039241L001"] [product="partial gene, no protein identified"] [strand="-"]	1
pda-5p-2741_10004	PDK_30s741321g004	3	20.448	1	23	169	191	GGGAUGGGGCUGGUUUGGAAAAC	GUCUUCCAAACUAGCUUCAUUCA	Cleavage	[locus_tag="PDK_30s741321L004"] [product="partial gene, no protein identified"] [strand="-"]	1
pda-5p-2741_10004	PDK_30s764081g001	2.5	9.652	1	20	1222	1241	GGGAUGGGGCUGGUUUGGAA	CUUCAAACCAGCCCCAUUCU	Cleavage	[locus_tag="PDK_30s764081L001"] [product="prli-interacting factor g"] [strand="-"]	1
pda-5p-2741_10004	PDK_30s1113361g005	3	8.459	1	22	14	35	GGGAUGGGGCUGGUUUGGAAAA	UAUUUCAAAUCAGCCCUAUUUU	Cleavage	[locus_tag="PDK_30s1113361L005"] [product="similar to predicted protein"] [strand="+"]	1
pda-5p-2741_10004	PDK_30s872861g004	3	12.62	1	23	700	722	GGGAUGGGGCUGGUUUGGAAAAC	GUCCUCCAAUCCAGCCCCGUCCU	Cleavage	[locus_tag="PDK_30s872861L004"] [product="prp18 domain containing protein"] [strand="-"]	1
pda-5p-2741_10004	PDK_30s855441g001	2.5	21.167	1	20	547	566	GGGAUGGGGCUGGUUUGGAA	UUCCAAAGUAGCCUCAUCCU	Cleavage	[locus_tag="PDK_30s855441L001"] [product="similar to predicted protein"] [strand="-"]	1
pda-5p-2741_10004	PDK_30s877611g002	3	21.798	1	22	430	451	GGGAUGGGGCUGGUUUGGAAAA	UCUCUCGAGCCAGCUCCAUCCC	Cleavage	[locus_tag="PDK_30s877611L002"] [product="protein phosphatase"] [strand="-"]	1
pda-miR156a	PDK_30s789261g002	1	23.992	1	20	248	267	UGACAGAAGAGAGUGAGCAC	GUGCUCUCUCUCUUCUGUCA	Cleavage	[locus_tag="PDK_30s789261L002"] [product="partial gene, no protein identified"] [strand="+"]	1
pda-miR156a	PDK_30s772931g003	1	15.458	1	20	446	465	UGACAGAAGAGAGUGAGCAC	GUGCUCUCUCUCUUCUGUCA	Cleavage	[locus_tag="PDK_30s772931L003"] [product="partial gene, no protein identified"] [strand="+"]	1
pda-miR156a	PDK_30s756061g001	1	19.686	1	20	674	693	UGACAGAAGAGAGUGAGCAC	GUGCUCUCUCUCUUCUGUCA	Cleavage	[locus_tag="PDK_30s756061L001"] [product="partial gene, no protein identified"] [strand="+"]	1
pda-miR156a	PDK_30s882821g001	1	20.92	1	20	1365	1384	UGACAGAAGAGAGUGAGCAC	GUGCUCUCUCUCUUCUGUCA	Cleavage	[locus_tag="PDK_30s882821L001"] [product="partial gene, no protein identified"] [strand="+"]	1
pda-miR156a	PDK_30s704101g001	2.5	17.093	1	20	217	236	UGACAGAAGAGAGUGAGCAC	GUGCUCUCUCUCUUCGGUCA	Cleavage	[locus_tag="PDK_30s704101L001"] [product="partial gene, no protein identified"] [strand="-"]	1
pda-miR156a	PDK_30s1020031g001	2.5	9.497	1	20	2992	3011	UGACAGAAGAGAGUGAGCAC	GAGCUCUCUUUCUUCUGUCA	Cleavage	[locus_tag="PDK_30s1020031L001"] [product="partial gene, no protein identified"] [strand="-"]	1
pda-miR156a	PDK_30s670584g001	3	20.694	1	20	386	405	UGACAGAAGAGAGUGAGCAC	GUGCUUCCUAUUUUCUGUCA	Translation	[locus_tag="PDK_30s670584L001"] [product="3-hydroxyisobutyryl-coenzyme a expressed"] [strand="+"]	1
pda-miR396e_L-1_1ss7-A	PDK_30s65509484g003	1	13.649	1	21	291	311	UCCACAGGCUUUCUUGAACUG	CCGUUCAAGAAAGCCUGUGGA	Cleavage	[locus_tag="PDK_30s65509484L003"] [product="growth-regulating factor 1"] [strand="+"]	1
pda-miR396e_L-1_1ss7-A	PDK_30s1085001g001	1	17.363	1	21	377	397	UCCACAGGCUUUCUUGAACUG	CCGUUCAAGAAAGCCUGUGGA	Cleavage	[locus_tag="PDK_30s1085001L001"] [product="growth-regulating factor 3"] [strand="+"]	1
pda-miR396e_L-1_1ss7-A	PDK_30s65509404g002	1	17.856	1	21	234	254	UCCACAGGCUUUCUUGAACUG	CCGUUCAAGAAAGCCUGUGGA	Cleavage	[locus_tag="PDK_30s65509404L002"] [product="growth-regulating factor 1"] [strand="+"]	1
pda-miR396e_L-1_1ss7-A	PDK_30s739481g001	2	20.474	1	21	29	50	UCCACAGGCUUUCUUG-AACUG	CAGUUGCAAGAAAGCCUGUGGA	Cleavage	[locus_tag="PDK_30s739481L001"] [product="partial gene, no protein identified"] [strand="+"]	1
pda-miR396e_L-1_1ss7-A	PDK_30s922211g002	2.5	21.631	1	20	790	809	UCCACAGGCUUUCUUGAACU	CGUUCAAGAAAGCAUGUGGA	Cleavage	[locus_tag="PDK_30s922211L002"] [product="growth-regulating factor 1"] [strand="+"]	1
pda-miR396e_L-1_1ss7-A	PDK_30s746021g002	3	17.648	1	20	1837	1856	UCCACAGGCUUUCUUGAACU	AGUUCUAGGGAGUUUGUGGA	Cleavage	[locus_tag="PDK_30s746021L002"] [product="rsh1 (rela-spot homolog 1) catalytic"] [strand="+"]	1
pda-miR396e_L-1_1ss7-A	PDK_30s1208661g001	3	23.124	1	20	248	267	UCCACAGGCUUUCUUGAACU	AGUGCAUCAAAGCCUGUGGA	Cleavage	[locus_tag="PDK_30s1208661L001"] [product="partial gene, no protein identified"] [strand="+"]	1
pda-miR396_1ss21TG	PDK_30s1150791g004	3	22.869	1	21	208	228	UUCCACAGCUUUCUUGAACUG	CAGUUCAUGGAUGCUGUGGAG	Translation	[locus_tag="PDK_30s1150791L004"] [product="partial gene, no protein identified"] [strand="+"]	1
pda-miR396_1ss21TG	PDK_30s65509404g002	2	17.792	1	21	234	255	UUCCACA-GCUUUCUUGAACUG	CCGUUCAAGAAAGCCUGUGGAA	Cleavage	[locus_tag="PDK_30s65509404L002"] [product="growth-regulating factor 1"] [strand="+"]	1
pda-miR396_1ss21TG	PDK_30s1085001g001	2	17.378	1	21	377	398	UUCCACA-GCUUUCUUGAACUG	CCGUUCAAGAAAGCCUGUGGAA	Cleavage	[locus_tag="PDK_30s1085001L001"] [product="growth-regulating factor 3"] [strand="+"]	1
pda-miR396_1ss21TG	PDK_30s65509484g003	2	13.606	1	21	291	312	UUCCACA-GCUUUCUUGAACUG	CCGUUCAAGAAAGCCUGUGGAA	Cleavage	[locus_tag="PDK_30s65509484L003"] [product="growth-regulating factor 1"] [strand="+"]	1
pda-miR396_1ss21TG	PDK_30s687611g004	3	14.602	1	20	125	144	UUCCACAGCUUUCUUGAACU	AAUUCGAGAAAGUUGUGGAC	Cleavage	[locus_tag="PDK_30s687611L004"] [product="partial gene, no protein identified"] [strand="+"]	1
pda-miR396_1ss21TG	PDK_30s922211g002	2	21.657	1	19	791	810	UUCCACA-GCUUUCUUGAAC	GUUCAAGAAAGCAUGUGGAA	Cleavage	[locus_tag="PDK_30s922211L002"] [product="growth-regulating factor 1"] [strand="+"]	1
pda-miR396_1ss21TG	PDK_30s1060371g001	3	15.04	1	20	212	231	UUCCACAGCUUUCUUGAACU	AGUUCAAGAAAAUUAUGGAA	Translation	[locus_tag="PDK_30s1060371L001"] [product="partial gene, no protein identified"] [strand="+"]	1
pda-miR396_1ss21TG	PDK_30s1155011g001	3	16.178	1	21	301	321	UUCCACAGCUUUCUUGAACUG	UGGAUCAAGAAGGGUGUGGAA	Cleavage	[locus_tag="PDK_30s1155011L001"] [product="retrotransposon ty3-gypsy subclass"] [strand="+"]	1
pda-miR166a	PDK_30s693742g001	2	23.664	1	20	591	610	UCGGACCAGGCUUCAUUCCC	UGGGAUGAAGCCUGGUCCGG	Cleavage	[locus_tag="PDK_30s693742L001"] [product="homeodomain-leucine zipper trancription factorhb-3"] [strand="+"]	1
pda-miR166a	PDK_30s929391g001	2	20.984	1	20	492	511	UCGGACCAGGCUUCAUUCCC	UGGGAUGAAGCCUGGUCCGG	Cleavage	[locus_tag="PDK_30s929391L001"] [product="rolled expressed"] [strand="+"]	1
pda-miR166a	PDK_30s729201g002	2	16.83	1	20	643	662	UCGGACCAGGCUUCAUUCCC	GGGGAUGAAGCCGGGUUCGA	Cleavage	[locus_tag="PDK_30s729201L002"] [product="zinc finger cchc-type and rna binding motif 1"] [strand="+"]	1
pda-miR166a	PDK_30s764871g001	2.5	20.248	1	20	1372	1391	UCGGACCAGGCUUCAUUCCC	GGGAAUGGUGCCUGGUCCGC	Cleavage	[locus_tag="PDK_30s764871L001"] [product="partial gene, no protein identified"] [strand="+"]	1
pda-miR166a	PDK_30s745201g003	2.5	22.028	1	20	1560	1579	UCGGACCAGGCUUCAUUCCC	GGGAAGAGAGCCUGGUCCGA	Cleavage	[locus_tag="PDK_30s745201L003"] [product="endonuclease iii homologue"] [strand="-"]	1
Table S6 (B)
miRNA_Acc.	Target_Acc.	Expectation	UPE	miRNA_start	miRNA_end	Target_start	Target_end	miRNA_aligned_fragment	Target_aligned_fragment	Inhibition	Target_Desc.	multiplicity
pda-miR156i-3p_R-3_1ss6AT	PDK_30s1027821g004	1.5	15.745	1	20	757	776	UGCUCUCUUCUCUUUCUGUC	GACAGGAGGAGAAGGGAGCA	Cleavage	[locus_tag="PDK_30s1027821L004"] [product="similar to predicted protein"] [strand="+"]	1
pda-miR156i-3p_R-3_1ss6AT	PDK_30s674581g005	2.5	7.195	1	20	456	475	UGCUCUCUUCUCUUUCUGUC	GAUAGGAAGAGAAGAGAGUC	Cleavage	[locus_tag="PDK_30s674581L005"] [product="partial gene, no protein identified"] [strand="+"]	1
pda-miR156i-3p_R-3_1ss6AT	PDK_30s1068601g003	2	16.24	1	20	469	488	UGCUCUCUUCUCUUUCUGUC	GAUGGGAAGAGAGGAGAGCA	Cleavage	[locus_tag="PDK_30s1068601L003"] [product="similar to predicted protein"] [strand="+"]	1
pda-miR156i-3p_R-3_1ss6AT	PDK_30s918561g016	2.5	13.563	1	20	1560	1579	UGCUCUCUUCUCUUUCUGUC	GGCAGAAGGAGAGGAGGGUA	Cleavage	[locus_tag="PDK_30s918561L016"] [product="leucine rich repeat-containing"] [strand="+"]	1
pda-miR156i-3p_R-3_1ss6AT	PDK_30s790611g005	2.5	23.466	1	20	3	22	UGCUCUCUUCUCUUUCUGUC	GGCAGGAAGAGAGGAGGGCG	Cleavage	[locus_tag="PDK_30s790611L005"] [product="partial gene, no protein identified"] [strand="+"]	1
pda-miR156i-3p_R-3_1ss6AT	PDK_30s864371g001	2.5	21.121	1	20	1356	1375	UGCUCUCUUCUCUUUCUGUC	GGCAGAAGGAGAUGAGAGUA	Cleavage	[locus_tag="PDK_30s864371L001"] [product="nb-arc domain containing expressed"] [strand="+"]	1
pda-miR156i-3p_R-3_1ss6AT	PDK_30s741231g001	2	10.31	1	20	5	24	UGCUCUCUUCUCUUUCUGUC	GGGAGAAGGAGAAGAGAGCA	Cleavage	[locus_tag="PDK_30s741231L001"] [product="similar to predicted protein"] [strand="+"]	1
pda-miR156i-3p_R-3_1ss6AT	PDK_30s1037321g005	2.5	21.362	1	20	528	547	UGCUCUCUUCUCUUUCUGUC	CAAAGAAAGAGAAGAGGGCA	Cleavage	[locus_tag="PDK_30s1037321L005"] [product="similar to predicted protein"] [strand="-"]	1
pda-miR156i-3p_R-3_1ss6AT	PDK_30s998691g002	3	6.888	1	20	1708	1727	UGCUCUCUUCUCUUUCUGUC	GAUGGAAAGAGAGGAGAGGA	Cleavage	[locus_tag="PDK_30s998691L002"] [product="beta-hexosaminidase precursor"] [strand="-"]	1
pda-miR156i-3p_R-3_1ss6AT	PDK_30s1148111g001	3	17.052	1	20	6978	6997	UGCUCUCUUCUCUUUCUGUC	GGUAGAAGAAGAAGAGGGCA	Cleavage	[locus_tag="PDK_30s1148111L001"] [product="multidrug resistance protein"] [strand="+"]	1
pda-miR156i-3p_R-3_1ss6AT	PDK_30s817541g001	2.5	19.465	1	20	1131	1150	UGCUCUCUUCUCUUUCUGUC	GGAAGAAAGAGAGGAGGGCA	Cleavage	[locus_tag="PDK_30s817541L001"] [product="oxysterol-binding expressed"] [strand="+"]	1
pda-miR156i-3p_R-3_1ss6AT	PDK_30s660871g001	3	9.499	1	20	369	388	UGCUCUCUUCUCUUUCUGUC	GACAGAGAGAGGAGAGACCG	Cleavage	[locus_tag="PDK_30s660871L001"] [product="hypothetical protein OsJ_00980"] [strand="+"]	1
pda-miR156i-3p_R-3_1ss6AT	PDK_30s1014921g001	2.5	18.881	1	20	2125	2144	UGCUCUCUUCUCUUUCUGUC	GAGAGAAAGACAAGAGAGUA	Translation	[locus_tag="PDK_30s1014921L001"] [product="multidrug resistance protein"] [strand="+"]	1
pda-miR156i-3p_R-3_1ss6AT	PDK_30s1081361g001	3	15.943	1	20	451	470	UGCUCUCUUCUCUUUCUGUC	AGCAUGAAGAGAAGAGAGCA	Cleavage	[locus_tag="PDK_30s1081361L001"] [product="cytochrome p450"] [strand="+"]	1
pda-miR156i-3p_R-3_1ss6AT	PDK_30s720971g002	3	19.198	1	20	1103	1122	UGCUCUCUUCUCUUUCUGUC	GACAGCAAGAGAGGAUAGCA	Cleavage	[locus_tag="PDK_30s720971L002"] [product="partial gene, no protein identified"] [strand="+"]	1
pda-miR156i-3p_R-3_1ss6AT	PDK_30s1016851g001	3	16.652	1	20	939	958	UGCUCUCUUCUCUUUCUGUC	GGCAGGGAAGGAAGAGAGCA	Cleavage	[locus_tag="PDK_30s1016851L001"] [product="similar to predicted protein"] [strand="-"]	1
pda-miR393b-3p_R-1_2ss5A-21GT	PDK_30s671321g002	2.5	14.012	1	20	206	225	AUCAUGCGAUCCUUUUGGAU	AUCCAAAGGGAUCGCAUUGU	Cleavage	[locus_tag="PDK_30s671321L002"] [product="transport inhibitor response 1"] [strand="-"]	1
pda-miR393b-3p_R-1_2ss5A-21GT	PDK_30s717471g001	2	24.214	1	20	1241	1260	AUCAUGCGAUCCUUUUGGAU	AGCUAAAAGGAUUGCAUGAU	Cleavage	[locus_tag="PDK_30s717471L001"] [product="receptor protein"] [strand="+"]	1
pda-miR393b-3p_R-1_2ss5A-21GT	PDK_30s741321g004	3	11.133	1	20	120	139	AUCAUGCGAUCCUUUUGGAU	GUCCAAAAGAAUUGUAUGGU	Translation	[locus_tag="PDK_30s741321L004"] [product="partial gene, no protein identified"] [strand="-"]	1
pda-miR827-3p_R-1	PDK_30s703271g003	2	19.773	1	20	401	420	UUAGAUGACCAUCAGCAAAC	GUUUGCUGCUGGUUAUCUAG	Cleavage	[locus_tag="PDK_30s703271L003"] [product="partial gene, no protein identified"] [strand="-"]	1
pda-miR827-3p_R-1	PDK_30s973161g001	2.5	16.601	1	20	1458	1477	UUAGAUGACCAUCAGCAAAC	GUCUGCUGAUGAUCAUCUGA	Translation	[locus_tag="PDK_30s973161L001"] [product="histone acetyltransferase"] [strand="+"]	1
pda-miR827-3p_R-1	PDK_30s804361g004	3	11.225	1	20	526	545	UUAGAUGACCAUCAGCAAAC	GUUUGCUGAUGGCCAAUUAA	Cleavage	[locus_tag="PDK_30s804361L004"] [product="retinoblastoma protein"] [strand="-"]	1
pda-miR827-3p_R-1	PDK_30s1191581g001	2.5	17.154	1	20	1626	1645	UUAGAUGACCAUCAGCAAAC	GUCUGCUGAUGAUCAUCUGA	Translation	[locus_tag="PDK_30s1191581L001"] [product="histone acetyltransferase"] [strand="+"]	1
pda-miR827-3p_R-1	PDK_30s760631g001	3	16.906	1	20	1478	1497	UUAGAUGACCAUCAGCAAAC	GUUAGCAGAUGGUCAUUUGA	Cleavage	[locus_tag="PDK_30s760631L001"] [product="receptor protein"] [strand="-"]	1
pda-miR172a_R-1_1ss1AG	PDK_30s758731g001	0.5	14.903	1	20	286	305	GGAAUCUUGAUGAUGCUGCA	UGCAGCAUCAUCAAGAUUCU	Cleavage	[locus_tag="PDK_30s758731L001"] [product="partial gene, no protein identified"] [strand="-"]	1
pda-miR172a_R-1_1ss1AG	PDK_30s749921g002	0.5	14.657	1	20	1326	1345	GGAAUCUUGAUGAUGCUGCA	UGCAGCAUCAUCAGGAUUCC	Cleavage	[locus_tag="PDK_30s749921L002"] [product="ap2 domain-containing transcription factor"] [strand="+"]	1
pda-miR172a_R-1_1ss1AG	PDK_30s929391g001	2.5	23.688	1	20	2033	2052	GGAAUCUUGAUGAUGCUGCA	UGUGGCAUCAUCAAGAUGCC	Cleavage	[locus_tag="PDK_30s929391L001"] [product="rolled expressed"] [strand="+"]	1
pda-miR172a_R-1_1ss1AG	PDK_30s862391g001	3	24.497	1	20	85	104	GGAAUCUUGAUGAUGCUGCA	UGCGGUGUCAUCAAGAAUCC	Cleavage	[locus_tag="PDK_30s862391L001"] [product="plasma membrane-type calcium atpase"] [strand="+"]	1
pda-miR172a_R-1_1ss1AG	PDK_30s1067401g004	3	12.853	1	20	1039	1058	GGAAUCUUGAUGAUGCUGCA	UGCAGCACUAUCAAGAUUUG	Cleavage	[locus_tag="PDK_30s1067401L004"] [product="ferredoxin-dependent glutamate synthase"] [strand="-"]	1
pda-miR172a_R-1_1ss1AG	PDK_30s795501g001	2.5	20.598	1	20	3080	3099	GGAAUCUUGAUGAUGCUGCA	UGCAGCAUAAACAAGAUUCU	Translation	[locus_tag="PDK_30s795501L001"] [product="partial gene, no protein identified"] [strand="+"]	1
pda-miR169j-3p_R+1_2ss18TG19CT	PDK_30s905321g003	3	22.226	1	20	126	144	GGCAGUCUCCUUGGCUAGUC	GGCU-GCCAAGGAGGCUGCC	Cleavage	[locus_tag="PDK_30s905321L003"] [product="partial gene, no protein identified"] [strand="+"]	1
pda-miR172i-3p	PDK_30s758731g001	0.5	14.903	1	21	285	305	GGAAUCUUGAUGAUGCUGCAU	AUGCAGCAUCAUCAAGAUUCU	Cleavage	[locus_tag="PDK_30s758731L001"] [product="partial gene, no protein identified"] [strand="-"]	1
pda-miR172i-3p	PDK_30s749921g002	0.5	14.657	1	21	1325	1345	GGAAUCUUGAUGAUGCUGCAU	GUGCAGCAUCAUCAGGAUUCC	Cleavage	[locus_tag="PDK_30s749921L002"] [product="ap2 domain-containing transcription factor"] [strand="+"]	1
pda-miR172i-3p	PDK_30s929391g001	2.5	23.688	1	20	2033	2052	GGAAUCUUGAUGAUGCUGCA	UGUGGCAUCAUCAAGAUGCC	Cleavage	[locus_tag="PDK_30s929391L001"] [product="rolled expressed"] [strand="+"]	1
pda-miR172i-3p	PDK_30s795501g001	2.5	20.598	1	21	3079	3099	GGAAUCUUGAUGAUGCUGCAU	AUGCAGCAUAAACAAGAUUCU	Translation	[locus_tag="PDK_30s795501L001"] [product="partial gene, no protein identified"] [strand="+"]	1
pda-miR172i-3p	PDK_30s862391g001	3	24.497	1	20	85	104	GGAAUCUUGAUGAUGCUGCA	UGCGGUGUCAUCAAGAAUCC	Cleavage	[locus_tag="PDK_30s862391L001"] [product="plasma membrane-type calcium atpase"] [strand="+"]	1
pda-miR172i-3p	PDK_30s1067401g004	3	12.853	1	20	1039	1058	GGAAUCUUGAUGAUGCUGCA	UGCAGCACUAUCAAGAUUUG	Cleavage	[locus_tag="PDK_30s1067401L004"] [product="ferredoxin-dependent glutamate synthase"] [strand="-"]	1
pda-miR393a	PDK_30s803071g001	1	19.518	1	20	1503	1522	UCCAAAGGGAUCGCAUUGAU	AACAAUGCGAUCCCUUUGGA	Cleavage	[locus_tag="PDK_30s803071L001"] [product="transport inhibitor response 1"] [strand="+"]	1
pda-miR393a	PDK_30s894761g001	2	23.277	1	20	1059	1078	UCCAAAGGGAUCGCAUUGAU	GACAAUGCGAUCCCUUUGGA	Cleavage	[locus_tag="PDK_30s894761L001"] [product="transport inhibitor response 1"] [strand="+"]	1
pda-miR393a	PDK_30s947241g003	2	22.62	1	20	1221	1240	UCCAAAGGGAUCGCAUUGAU	GACAAUGCGAUCCCUUUGGA	Cleavage	[locus_tag="PDK_30s947241L003"] [product="transport inhibitor response 1"] [strand="+"]	1
pda-miR393a	PDK_30s1163791g001	3	15.908	1	20	41	60	UCCAAAGGGAUCGCAUUGAU	AUUAAUGCGGUGUCUUUGGG	Translation	[locus_tag="PDK_30s1163791L001"] [product="partial gene, no protein identified"] [strand="-"]	1
pda-miR166a-5p_L+1R-1_1ss16CT	PDK_30s865121g003	3	11.392	1	21	39	59	GGGAAUGUUGUCUGGUUCGAG	CUCGACCCAGACAGCAUUCGC	Cleavage	[locus_tag="PDK_30s865121L003"] [product="partial gene, no protein identified"] [strand="-"]	1
pda-miR166a-5p_L+1R-1_1ss16CT	PDK_30s772301g005	3	20.71	1	21	186	206	GGGAAUGUUGUCUGGUUCGAG	CUCCAACUGGCCAACAUUCCC	Translation	[locus_tag="PDK_30s772301L005"] [product="grx_s14 Grx_S15.1- glutaredoxin subgroup ii"] [strand="+"]	1
pda-miR166a-5p_L+1R-1_1ss16CT	PDK_30s707665g004	3	19.597	1	21	1675	1695	GGGAAUGUUGUCUGGUUCGAG	UUUGAACCAGAUAUCAUUUCU	Cleavage	[locus_tag="PDK_30s707665L004"] [product="pentatricopeptide repeat-containing protein"] [strand="+"]	1
pda-miR166a-5p_L+1R-1_1ss16CT	PDK_30s708971g002	3	17.278	1	21	1204	1224	GGGAAUGUUGUCUGGUUCGAG	CUCAAGCCAGCCAACAUUCUC	Translation	[locus_tag="PDK_30s708971L002"] [product="u-box domain containing expressed"] [strand="+"]	1
pda-miR166a-5p_L+1R-1_1ss16CT	PDK_30s6550978g002	3	18.727	1	20	686	705	GGGAAUGUUGUCUGGUUCGA	UGGAAGCGGACAACAUUCUC	Cleavage	[locus_tag="PDK_30s6550978L002"] [product="calcium-dependent protein kinase"] [strand="-"]	1
pda-miR166a-5p_L+1R-1_1ss16CT	PDK_30s6550999g002	3	20.34	1	20	1826	1845	GGGAAUGUUGUCUGGUUCGA	UCAAACCAAGCAACAUUCUC	Cleavage	[locus_tag="PDK_30s6550999L002"] [product="lim domain"] [strand="+"]	1
pda-miR169a	PDK_30s6550962g001	2.5	19.996	1	20	1632	1651	UAGCCAAGGAUGACUUGCCU	AGGGAGGUCAUCUUUGGCUG	Cleavage	[locus_tag="PDK_30s6550962L001"] [product="partial gene, no protein identified"] [strand="+"]	1
pda-miR172a	PDK_30s758731g001	0	14.903	1	21	285	305	AGAAUCUUGAUGAUGCUGCAU	AUGCAGCAUCAUCAAGAUUCU	Cleavage	[locus_tag="PDK_30s758731L001"] [product="partial gene, no protein identified"] [strand="-"]	1
pda-miR172a	PDK_30s749921g002	1.5	14.657	1	21	1325	1345	AGAAUCUUGAUGAUGCUGCAU	GUGCAGCAUCAUCAGGAUUCC	Cleavage	[locus_tag="PDK_30s749921L002"] [product="ap2 domain-containing transcription factor"] [strand="+"]	1
pda-miR172a	PDK_30s795501g001	2	20.598	1	21	3079	3099	AGAAUCUUGAUGAUGCUGCAU	AUGCAGCAUAAACAAGAUUCU	Translation	[locus_tag="PDK_30s795501L001"] [product="partial gene, no protein identified"] [strand="+"]	1
pda-miR172a	PDK_30s1122321g001	3	8.352	1	20	7	26	AGAAUCUUGAUGAUGCUGCA	UGCAGCAUUGUUAAGCUUCU	Cleavage	[locus_tag="PDK_30s1122321L001"] [product="_rbz domain protein"] [strand="-"]	1
pda-miR172a	PDK_30s1125961g002	3	15.454	1	21	633	653	AGAAUCUUGAUGAUGCUGCAU	AUGCAGCACCCUUGAGAUUCU	Translation	[locus_tag="PDK_30s1125961L002"] [product="abc transporter cholesterol phospholipidflippase"] [strand="-"]	1
pda-miR172a	PDK_30s1067401g004	3	12.853	1	20	1039	1058	AGAAUCUUGAUGAUGCUGCA	UGCAGCACUAUCAAGAUUUG	Cleavage	[locus_tag="PDK_30s1067401L004"] [product="ferredoxin-dependent glutamate synthase"] [strand="-"]	1
pda-miR172a	PDK_30s992641g001	3	16.554	1	20	358	377	AGAAUCUUGAUGAUGCUGCA	UGGAGCAUCAUCAAGAAUUU	Cleavage	[locus_tag="PDK_30s992641L001"] [product="partial gene, no protein identified"] [strand="-"]	1
pda-miR172a	PDK_30s776711g001	3	16.443	1	20	955	974	AGAAUCUUGAUGAUGCUGCA	UGCAGUAUCGUGGAGGUUCU	Translation	[locus_tag="PDK_30s776711L001"] [product="dnaj protein"] [strand="+"]	1
pda-miR172a	PDK_30s1197791g013	3	15.669	1	21	2877	2897	AGAAUCUUGAUGAUGCUGCAU	GUGUAUCAUCUUCAGGAUUCU	Translation	[locus_tag="PDK_30s1197791L013"] [product="similar to predicted protein"] [strand="-"]	1
pda-miR164_1ss21GC	PDK_30s747721g001	3	21.067	1	21	27	47	UGGAGAAGCAGGGCACGUGCC	GGCAUUUGCUCUGUUUCUUCA	Cleavage	[locus_tag="PDK_30s747721L001"] [product="beta-mannosidase 4"] [strand="+"]	1
pda-miR164_1ss21GC	PDK_30s1141931g003	2.5	22.196	1	20	642	661	UGGAGAAGCAGGGCACGUGC	UCACGUGACCUGCUUCUCCG	Cleavage	[locus_tag="PDK_30s1141931L003"] [product="nac domain ipr003441"] [strand="+"]	1
pda-miR164_1ss21GC	PDK_30s1198591g001	2	16.67	1	20	633	652	UGGAGAAGCAGGGCACGUGC	GCAAGUUCCCUGCUUCUCCA	Cleavage	[locus_tag="PDK_30s1198591L001"] [product="nac domain ipr003441"] [strand="+"]	1
pda-miR164_1ss21GC	PDK_30s658491g001	3	16.161	1	20	1256	1275	UGGAGAAGCAGGGCACGUGC	CCACGAGCCUUGCUUCUCCG	Cleavage	[locus_tag="PDK_30s658491L001"] [product="partial gene, no protein identified"] [strand="-"]	1
pda-miR164_1ss21GC	PDK_30s1181011g001	3	14.097	1	20	1316	1335	UGGAGAAGCAGGGCACGUGC	CCACGAGCCCUGCUUCUCUG	Cleavage	[locus_tag="PDK_30s1181011L001"] [product="partial gene, no protein identified"] [strand="-"]	1
pda-miR164_1ss21GC	PDK_30s830581g001	3	19.233	1	20	174	193	UGGAGAAGCAGGGCACGUGC	GCGCUUGUCCCGCUUCUCCA	Translation	[locus_tag="PDK_30s830581L001"] [product="partial gene, no protein identified"] [strand="-"]	1
pda-miR156h-p3_1ss11AT	PDK_30s740851g001	3	20.348	1	21	567	587	UUGCGUGCUCUCUUCUCUUUC	GAAGGGGAAGUGGGCACGCAG	Translation	[locus_tag="PDK_30s740851L001"] [product="partial gene, no protein identified"] [strand="+"]	1
pda-miR156h-p3_1ss11AT	PDK_30s991741g001	3	20.882	1	21	472	492	UUGCGUGCUCUCUUCUCUUUC	GGUAGAGAAGAGGCCACGCAA	Cleavage	[locus_tag="PDK_30s991741L001"] [product="similar to predicted protein"] [strand="-"]	1
pda-miR164b-3p_2ss16AT20TC	PDK_30s728541g001	2.5	19.267	1	21	1147	1167	CAUGUGCCCAUCUUCUCCACC	GGAGGAGAAAAUGGGCAUAUG	Cleavage	[locus_tag="PDK_30s728541L001"] [product="double-stranded rna binding"] [strand="-"]	1
pda-miR164b-3p_2ss16AT20TC	PDK_30s729801g001	3	24.551	1	21	112	132	CAUGUGCCCAUCUUCUCCACC	GGUGGGAAGGAUUGGCACAUG	Translation	[locus_tag="PDK_30s729801L001"] [product="partial gene, no protein identified"] [strand="+"]	1
pda-miR164b-3p_2ss16AT20TC	PDK_30s831041g011	3	16.255	1	20	784	803	CAUGUGCCCAUCUUCUCCAC	UUGUAGAACAUGGGCACAUG	Cleavage	[locus_tag="PDK_30s831041L011"] [product="acs-like protein"] [strand="-"]	1
pda-miR172a_1ss1AG	PDK_30s758731g001	0.5	14.903	1	21	285	305	GGAAUCUUGAUGAUGCUGCAU	AUGCAGCAUCAUCAAGAUUCU	Cleavage	[locus_tag="PDK_30s758731L001"] [product="partial gene, no protein identified"] [strand="-"]	1
pda-miR172a_1ss1AG	PDK_30s749921g002	0.5	14.657	1	21	1325	1345	GGAAUCUUGAUGAUGCUGCAU	GUGCAGCAUCAUCAGGAUUCC	Cleavage	[locus_tag="PDK_30s749921L002"] [product="ap2 domain-containing transcription factor"] [strand="+"]	1
pda-miR172a_1ss1AG	PDK_30s929391g001	2.5	23.688	1	20	2033	2052	GGAAUCUUGAUGAUGCUGCA	UGUGGCAUCAUCAAGAUGCC	Cleavage	[locus_tag="PDK_30s929391L001"] [product="rolled expressed"] [strand="+"]	1
pda-miR172a_1ss1AG	PDK_30s795501g001	2.5	20.598	1	21	3079	3099	GGAAUCUUGAUGAUGCUGCAU	AUGCAGCAUAAACAAGAUUCU	Translation	[locus_tag="PDK_30s795501L001"] [product="partial gene, no protein identified"] [strand="+"]	1
pda-miR172a_1ss1AG	PDK_30s862391g001	3	24.497	1	20	85	104	GGAAUCUUGAUGAUGCUGCA	UGCGGUGUCAUCAAGAAUCC	Cleavage	[locus_tag="PDK_30s862391L001"] [product="plasma membrane-type calcium atpase"] [strand="+"]	1
pda-miR172a_1ss1AG	PDK_30s1067401g004	3	12.853	1	20	1039	1058	GGAAUCUUGAUGAUGCUGCA	UGCAGCACUAUCAAGAUUUG	Cleavage	[locus_tag="PDK_30s1067401L004"] [product="ferredoxin-dependent glutamate synthase"] [strand="-"]	1
pda-miR164a-3p_1ss10TC	PDK_30s970901g001	3	21.606	1	20	84	103	CAUGUGCCCCUCUUCUCCAC	UUGGGGAAGAGGGGAACAUG	Cleavage	[locus_tag="PDK_30s970901L001"] [product="regulator of chromosome condensation familyprotein"] [strand="+"]	1
pda-miR169b-p5_1ss15TC	PDK_30s6550962g001	3	19.996	1	20	1632	1651	CAGCCAAGGAUGAUCUGCCG	AGGGAGGUCAUCUUUGGCUG	Cleavage	[locus_tag="PDK_30s6550962L001"] [product="partial gene, no protein identified"] [strand="+"]	1
pda-miR169b-p5_1ss15TC	PDK_30s6550940g002	3	18.717	1	20	1004	1023	CAGCCAAGGAUGAUCUGCCG	UGGCAUAUCAUAUUUGGCUG	Translation	[locus_tag="PDK_30s6550940L002"] [product="partial gene, no protein identified"] [strand="+"]	1
pda-miR529-3p_1ss20TC	PDK_30s932621g001	2	23.046	1	20	3	22	GCUGUACCCUCUCUCUUCUC	GGGGAGAGGGAGGGUGCAGC	Cleavage	[locus_tag="PDK_30s932621L001"] [product="apetala1-like protein"] [strand="+"]	1
pda-miR529-3p_1ss20TC	PDK_30s902761g001	3	20.357	1	20	2862	2881	GCUGUACCCUCUCUCUUCUC	GAGGUGAGAGAGGGUACUGC	Cleavage	[locus_tag="PDK_30s902761L001"] [product="aminophospholipid atpase"] [strand="-"]	1
pda-miR529-3p_1ss20TC	PDK_30s703951g001	3	20.421	1	20	382	401	GCUGUACCCUCUCUCUUCUC	GAGAAGAGUGAGGGUGUAGG	Cleavage	[locus_tag="PDK_30s703951L001"] [product="ribosomal protein s6"] [strand="+"]	1
pda-miR529-3p_1ss20TC	PDK_30s728401g001	3	15.404	1	20	401	420	GCUGUACCCUCUCUCUUCUC	GGGAGGAGAAGGGGUACAGU	Translation	[locus_tag="PDK_30s728401L001"] [product="partial gene, no protein identified"] [strand="+"]	1
pda-miR529-3p_1ss20TC	PDK_30s1142071g002	3	15.84	1	20	315	334	GCUGUACCCUCUCUCUUCUC	GGGAAGAGAGGGUGUGCAGU	Cleavage	[locus_tag="PDK_30s1142071L002"] [product="partial gene, no protein identified"] [strand="+"]	1
pda-miR535_1ss12GA	PDK_30s787781g010	3	5.675	1	20	633	652	UGACAACGAGAAAGAGCACG	CGUUCUCUUUCUCGUUCUCG	Cleavage	[locus_tag="PDK_30s787781L010"] [product="partial gene, no protein identified"] [strand="-"]	1
pda-miR535_1ss12GA	PDK_30s1084171g001	3	12.786	1	20	1325	1344	UGACAACGAGAAAGAGCACG	UGUGGUCUUUCUCAUUGUCA	Cleavage	[locus_tag="PDK_30s1084171L001"] [product="similar to predicted protein"] [strand="-"]	1
pda-miR167-3p_2ss8GC20CT	PDK_30s1008861g005	3	24.201	1	21	124	144	AGAUCAUCUGGCAGUUUCAUC	GGUGAGGCUGCUAGAUGAUCC	Cleavage	[locus_tag="PDK_30s1008861L005"] [product="growth-regulating factor 1"] [strand="-"]	1
pda-miR167-3p_2ss8GC20CT	PDK_30s799181g001	3	18.711	1	21	501	521	AGAUCAUCUGGCAGUUUCAUC	GAUGAAAUUUCCGUAUGAUCU	Cleavage	[locus_tag="PDK_30s799181L001"] [product="partial gene, no protein identified"] [strand="-"]	1
pda-miR167-3p_2ss8GC20CT	PDK_30s817251g007	3	20.786	1	20	469	488	AGAUCAUCUGGCAGUUUCAU	AUGAAUCUGUCAGAUGAUGU	Cleavage	[locus_tag="PDK_30s817251L007"] [product="calcineurin b-like protein 3"] [strand="+"]	1
pda-miR167-3p_2ss8GC20CT	PDK_30s973611g009	3	17.873	1	20	2995	3014	AGAUCAUCUGGCAGUUUCAU	AUGAAAUUGCUCGGUGGUCU	Translation	[locus_tag="PDK_30s973611L009"] [product="phd-finger family expressed"] [strand="-"]	1
pda-miR167-3p_2ss8GC20CT	PDK_30s846091g008	3	15.099	1	20	831	850	AGAUCAUCUGGCAGUUUCAU	UUGCAAAUGCCAGAUGAUCU	Cleavage	[locus_tag="PDK_30s846091L008"] [product="folylpolyglutamate synthase"] [strand="-"]	1
pda-3p-259371_23	PDK_30s772551g001	2.5	17.775	1	20	5	24	CGAGCGACUGUGAUUGGUGG	AGACCAAUCACAGUCGUUCG	Cleavage	[locus_tag="PDK_30s772551L001"] [product="partial gene, no protein identified"] [strand="+"]	1
pda-3p-259371_23	PDK_30s891471g001	2.5	16.477	1	20	335	354	CGAGCGACUGUGAUUGGUGG	CCAACAAUCACAGUUGUUUG	Cleavage	[locus_tag="PDK_30s891471L001"] [product="gtp binding"] [strand="-"]	1
pda-3p-259371_23	PDK_30s1088671g003	2.5	19.844	1	20	141	160	CGAGCGACUGUGAUUGGUGG	CAACCAAUCGGAGUCGCUCG	Translation	[locus_tag="PDK_30s1088671L003"] [product="partial gene, no protein identified"] [strand="+"]	1
pda-3p-165824_47	PDK_30s6550926g007	2	20.95	1	21	251	271	CUCCCAAGCCUCAUUUCAUGG	CCAUGAAAUGGGAUUUGGGAG	Translation	[locus_tag="PDK_30s6550926L007"] [product="mitochondrial transcription terminationfactor-like"] [strand="-"]	1
pda-3p-165824_47	PDK_30s941071g001	2	15.207	1	21	292	312	CUCCCAAGCCUCAUUUCAUGG	CCAUUAAAUAAGGCUUGGGAG	Cleavage	[locus_tag="PDK_30s941071L001"] [product="reduced leaflet 1"] [strand="+"]	1
pda-3p-165824_47	PDK_30s884261g003	3	18.376	1	21	1044	1064	CUCCCAAGCCUCAUUUCAUGG	CCAUGAAAUGAGGCUCGGCAG	Cleavage	[locus_tag="PDK_30s884261L003"] [product="mitochondrial transcription terminationfactor-like"] [strand="-"]	1
pda-3p-165824_47	PDK_30s884261g004	3	22.68	1	21	1035	1055	CUCCCAAGCCUCAUUUCAUGG	CCAUGAAAUGAGGCUCGGCAG	Cleavage	[locus_tag="PDK_30s884261L004"] [product="similar to predicted protein"] [strand="-"]	1
pda-3p-165824_47	PDK_30s666791g001	3	21.151	1	20	2307	2326	CUCCCAAGCCUCAUUUCAUG	CAAGAAUCGAGGCUUGGGAG	Cleavage	[locus_tag="PDK_30s666791L001"] [product="partial gene, no protein identified"] [strand="+"]	1
pda-3p-246312_25-R19	PDK_30s865341g003	3	15.227	1	20	962	981	UAUUUGUACCUCAUCAAUAU	AUAUUCAUGGGGUACACAUA	Cleavage	[locus_tag="PDK_30s865341L003"] [product="partial gene, no protein identified"] [strand="+"]	1
pda-3p-246312_25-R19	PDK_30s687161g008	3	14.426	1	21	136	156	UAUUUGUACCUCAUCAAUAUU	GAUGAUGAUGAUGUGCAAAUA	Translation	[locus_tag="PDK_30s687161L008"] [product="ubiquitin-protein ligase zinc ion bindingprotein"] [strand="+"]	1
pda-3p-246312_25-R19	PDK_30s1103751g017	3	19.341	1	20	1327	1346	UAUUUGUACCUCAUCAAUAU	AGGUUGAUGAUGUGCAAAUA	Translation	[locus_tag="PDK_30s1103751L017"] [product="swi snf matrix actin dependent regulator ofsubfamily a-like 1"] [strand="-"]	1
pda-5p-283724_20-R1	PDK_30s704661g006	3	18.507	1	21	787	807	UCUGGAGACCCAUAGCCCAUG	CAUGGGCUAUGUGUGUCCGGA	Translation	[locus_tag="PDK_30s704661L006"] [product="partial gene, no protein identified"] [strand="+"]	1
pda-5p-283724_20	PDK_30s704661g006	3	18.507	1	21	787	807	UCUGGAGACCCAUAGCCCAUG	CAUGGGCUAUGUGUGUCCGGA	Translation	[locus_tag="PDK_30s704661L006"] [product="partial gene, no protein identified"] [strand="+"]	1
pda-3p-165824_47-R18	PDK_30s6550926g007	2	20.95	1	21	251	271	CUCCCAAGCCUCAUUUCAUGG	CCAUGAAAUGGGAUUUGGGAG	Translation	[locus_tag="PDK_30s6550926L007"] [product="mitochondrial transcription terminationfactor-like"] [strand="-"]	1
pda-3p-165824_47-R18	PDK_30s941071g001	2	15.207	1	21	292	312	CUCCCAAGCCUCAUUUCAUGG	CCAUUAAAUAAGGCUUGGGAG	Cleavage	[locus_tag="PDK_30s941071L001"] [product="reduced leaflet 1"] [strand="+"]	1
pda-3p-165824_47-R18	PDK_30s884261g003	3	18.376	1	21	1044	1064	CUCCCAAGCCUCAUUUCAUGG	CCAUGAAAUGAGGCUCGGCAG	Cleavage	[locus_tag="PDK_30s884261L003"] [product="mitochondrial transcription terminationfactor-like"] [strand="-"]	1
pda-3p-165824_47-R18	PDK_30s884261g004	3	22.68	1	21	1035	1055	CUCCCAAGCCUCAUUUCAUGG	CCAUGAAAUGAGGCUCGGCAG	Cleavage	[locus_tag="PDK_30s884261L004"] [product="similar to predicted protein"] [strand="-"]	1
pda-3p-165824_47-R18	PDK_30s666791g001	3	21.151	1	20	2307	2326	CUCCCAAGCCUCAUUUCAUG	CAAGAAUCGAGGCUUGGGAG	Cleavage	[locus_tag="PDK_30s666791L001"] [product="partial gene, no protein identified"] [strand="+"]	1
pda-miR156i-3p_L-1R-1_2ss4TC22TA	PDK_30s740851g001	2.5	20.003	1	20	562	581	GCCCACUUCUCUUUCUGUCA	GGGCAGAAGGGGAAGUGGGC	Cleavage	[locus_tag="PDK_30s740851L001"] [product="partial gene, no protein identified"] [strand="+"]	1
pda-miR156i-3p_L-1R-1_2ss4TC22TA	PDK_30s790611g005	3	23.466	1	20	2	21	GCCCACUUCUCUUUCUGUCA	UGGCAGGAAGAGAGGAGGGC	Cleavage	[locus_tag="PDK_30s790611L005"] [product="partial gene, no protein identified"] [strand="+"]	1
pda-miR156i-3p_L-1R-1_2ss4TC22TA	PDK_30s658861g003	3	24.437	1	20	346	365	GCCCACUUCUCUUUCUGUCA	UGACAGUGAGAGGAGUGGGA	Cleavage	[locus_tag="PDK_30s658861L003"] [product="storekeeper protein"] [strand="-"]	1
pda-miR160b_L+2R-2	PDK_30s718951g001	0.5	20.267	1	21	1379	1399	UAUGCCUGGCUCCCUGUAUGC	GCAUACAGGGAGCCAGGCAUG	Cleavage	[locus_tag="PDK_30s718951L001"] [product="similar to predicted protein"] [strand="+"]	1
pda-miR160b_L+2R-2	PDK_30s951701g002	0.5	19.324	1	21	800	820	UAUGCCUGGCUCCCUGUAUGC	GCAUGCAGGGAGCCAGGCAUA	Cleavage	[locus_tag="PDK_30s951701L002"] [product="auxin response"] [strand="+"]	1
pda-miR160b_L+2R-2	PDK_30s966231g001	2.5	19.635	1	20	1325	1344	UAUGCCUGGCUCCCUGUAUG	CAAGUAGGGAGCCAGGCAUG	Cleavage	[locus_tag="PDK_30s966231L001"] [product="similar to predicted protein"] [strand="+"]	1
pda-miR160b_L+2R-2	PDK_30s827291g004	2.5	16.783	1	20	1474	1493	UAUGCCUGGCUCCCUGUAUG	CUUACAGAGAGCCAGGUAUA	Cleavage	[locus_tag="PDK_30s827291L004"] [product="partial gene, no protein identified"] [strand="-"]	1
pda-miR160b_L+2R-2	PDK_30s925571g001	3	21.802	1	20	1505	1524	UAUGCCUGGCUCCCUGUAUG	UAUGCAGGGAGGCGGGCAUG	Translation	[locus_tag="PDK_30s925571L001"] [product="aaa family cdc48 subfamily"] [strand="+"]	1
pda-miR156i-p3	PDK_30s799651g002	3	19.042	1	21	114	133	CUCUCUAUGCUUCUGCCAUCA	UGAUGGC-GAAGUAUGGAGAG	Cleavage	[locus_tag="PDK_30s799651L002"] [product="auxin amidohydrolase"] [strand="-"]	1
pda-miR156i-p3	PDK_30s969931g002	3	23.524	1	20	2854	2873	CUCUCUAUGCUUCUGCCAUC	GGUGGCAGCAACAUGGAGAG	Translation	[locus_tag="PDK_30s969931L002"] [product="partial gene, no protein identified"] [strand="-"]	1
pda-miR160a_L+1R-1	PDK_30s718951g001	1	20.156	1	21	1378	1398	CUGCCUGGCUCCCUGUAUGCC	GGCAUACAGGGAGCCAGGCAU	Cleavage	[locus_tag="PDK_30s718951L001"] [product="similar to predicted protein"] [strand="+"]	1
pda-miR160a_L+1R-1	PDK_30s951701g002	1.5	19.012	1	21	799	819	CUGCCUGGCUCCCUGUAUGCC	GGCAUGCAGGGAGCCAGGCAU	Cleavage	[locus_tag="PDK_30s951701L002"] [product="auxin response"] [strand="+"]	1
pda-miR160a_L+1R-1	PDK_30s1124891g002	3	21.748	1	21	277	297	CUGCCUGGCUCCCUGUAUGCC	GGCAUACAAGGAGCUUGGCAG	Cleavage	[locus_tag="PDK_30s1124891L002"] [product="nac domain ipr003441"] [strand="-"]	1
pda-miR169a_R-1	PDK_30s6550962g001	2.5	19.996	1	20	1632	1651	UAGCCAAGGAUGACUUGCCU	AGGGAGGUCAUCUUUGGCUG	Cleavage	[locus_tag="PDK_30s6550962L001"] [product="partial gene, no protein identified"] [strand="+"]	1
pda-miR169_R-1_1ss1CT	PDK_30s6550962g001	2.5	19.996	1	20	1632	1651	UAGCCAAGGAUGACUUGCCU	AGGGAGGUCAUCUUUGGCUG	Cleavage	[locus_tag="PDK_30s6550962L001"] [product="partial gene, no protein identified"] [strand="+"]	1
pda-miR399a	PDK_30s729341g005	2.5	16.895	1	21	611	631	UGCCAAAGGAGAGUUGCCCUG	UAGGGUAACUUUCCCUUGGCA	Cleavage	[locus_tag="PDK_30s729341L005"] [product="partial gene, no protein identified"] [strand="-"]	1
pda-miR399a	PDK_30s852621g001	3	24.531	1	20	779	797	UGCCAAAGGAGAGUUGCCCU	AGGGCAACU-UCCUUUGGUG	Translation	[locus_tag="PDK_30s852621L001"] [product="partial gene, no protein identified"] [strand="-"]	1
pda-miR529e	PDK_30s756061g001	1.5	16.372	1	20	670	689	AGAAGAGAGAGAGUACAGCC	AGCUGUGCUCUCUCUCUUCU	Cleavage	[locus_tag="PDK_30s756061L001"] [product="partial gene, no protein identified"] [strand="+"]	1
pda-miR529e	PDK_30s704101g001	2.5	17.648	1	20	213	232	AGAAGAGAGAGAGUACAGCC	AGCUGUGCUCUCUCUCUUCG	Cleavage	[locus_tag="PDK_30s704101L001"] [product="partial gene, no protein identified"] [strand="-"]	1
pda-miR529e	PDK_30s772931g003	2	13.697	1	20	442	461	AGAAGAGAGAGAGUACAGCC	GAUUGUGCUCUCUCUCUUCU	Cleavage	[locus_tag="PDK_30s772931L003"] [product="partial gene, no protein identified"] [strand="+"]	1
pda-miR529e	PDK_30s774191g002	2.5	20.457	1	20	1242	1261	AGAAGAGAGAGAGUACAGCC	GGUUGAACUCUCUCUCUUCA	Cleavage	[locus_tag="PDK_30s774191L002"] [product="abscisic acid responsive elements-bindingfactor"] [strand="-"]	1
pda-miR529e	PDK_30s1025931g001	3	21.478	1	20	588	607	AGAAGAGAGAGAGUACAGCC	GGCCGUGCUCUUCCUCUUCU	Cleavage	[locus_tag="PDK_30s1025931L001"] [product="partial gene, no protein identified"] [strand="+"]	1
pda-miR529e	PDK_30s905141g003	3	17.681	1	20	1918	1937	AGAAGAGAGAGAGUACAGCC	GGCUGAACUCGCUUUCUUUU	Translation	[locus_tag="PDK_30s905141L003"] [product="partial gene, no protein identified"] [strand="-"]	1
pda-miR171h_L-1R+1	PDK_30s983281g001	3	22.379	1	20	370	389	UGAGCCGAACCAAUAUCACU	UGUGAUUUUGGUUUGGCUCG	Cleavage	[locus_tag="PDK_30s983281L001"] [product="mpk14 - mapk"] [strand="+"]	1
pda-miR398a_R+1_1ss15AG	PDK_30s760501g002	3	16.793	1	22	100	121	UGUGUUCUCAGGUCGCCCCUUU	GAAGGGGAGACUUGAGAAUAUG	Cleavage	[locus_tag="PDK_30s760501L002"] [product="similar to predicted protein"] [strand="-"]	1
pda-miR398a_R+1_1ss15AG	PDK_30s657581g001	3	20.927	1	22	469	490	UGUGUUCUCAGGUCGCCCCUUU	GGAGGGGCGACUGGAGAACUCA	Translation	[locus_tag="PDK_30s657581L001"] [product="mads box"] [strand="-"]	1
pda-miR398a_R+1_1ss15AG	PDK_30s969551g002	3	22.458	1	21	543	563	UGUGUUCUCAGGUCGCCCCUU	GAGGGGGGACUGGAGGACACA	Translation	[locus_tag="PDK_30s969551L002"] [product="transparent testa 1"] [strand="+"]	1
pda-miR156a_L+1	PDK_30s772931g003	1	15.287	1	21	446	466	AUGACAGAAGAGAGUGAGCAC	GUGCUCUCUCUCUUCUGUCAU	Cleavage	[locus_tag="PDK_30s772931L003"] [product="partial gene, no protein identified"] [strand="+"]	1
pda-miR156a_L+1	PDK_30s789261g002	2	23.842	1	21	248	268	AUGACAGAAGAGAGUGAGCAC	GUGCUCUCUCUCUUCUGUCAA	Cleavage	[locus_tag="PDK_30s789261L002"] [product="partial gene, no protein identified"] [strand="+"]	1
pda-miR156a_L+1	PDK_30s756061g001	2	21.536	1	21	674	694	AUGACAGAAGAGAGUGAGCAC	GUGCUCUCUCUCUUCUGUCAA	Cleavage	[locus_tag="PDK_30s756061L001"] [product="partial gene, no protein identified"] [strand="+"]	1
pda-miR156a_L+1	PDK_30s882821g001	2	20.571	1	21	1365	1385	AUGACAGAAGAGAGUGAGCAC	GUGCUCUCUCUCUUCUGUCAA	Cleavage	[locus_tag="PDK_30s882821L001"] [product="partial gene, no protein identified"] [strand="+"]	1
pda-miR156a_L+1	PDK_30s877561g003	2.5	8.299	1	20	1313	1332	AUGACAGAAGAGAGUGAGCA	UGCUCAAUUUGUUCUGUCAU	Translation	[locus_tag="PDK_30s877561L003"] [product="bipolar kinesin krp-"] [strand="-"]	1
pda-miR156a_L+1	PDK_30s1045441g001	3	17.266	1	20	368	387	AUGACAGAAGAGAGUGAGCA	UGUUCAAUCUCCUUUGUCAU	Translation	[locus_tag="PDK_30s1045441L001"] [product="agl20-like mads box transcription factor"] [strand="-"]	1
pda-miR156a_L+1	PDK_30s1010681g003	3	17.455	1	20	1003	1022	AUGACAGAAGAGAGUGAGCA	UCUUAAUUCUCUUCUGUCAU	Cleavage	[locus_tag="PDK_30s1010681L003"] [product="partial gene, no protein identified"] [strand="-"]	1
pda-miR167a	PDK_30s1201081g001	3	14.943	1	21	493	513	UGAAGCUGCCAGCAUGAUCUA	UAUAUUAUCUUGGCAGCUUCA	Cleavage	[locus_tag="PDK_30s1201081L001"] [product="f-box-containing protein 2"] [strand="+"]	1
pda-miR167a	PDK_30s886891g002	3	18.061	1	20	983	1002	UGAAGCUGCCAGCAUGAUCU	AGAUCAUCUUGGUAGCUUUG	Cleavage	[locus_tag="PDK_30s886891L002"] [product="retrotransposon ty3-gypsy subclass"] [strand="-"]	1
pda-miR167a	PDK_30s868111g005	3	17.131	1	20	2699	2718	UGAAGCUGCCAGCAUGAUCU	AGAUCAUGUCGGGAGCUUCG	Translation	[locus_tag="PDK_30s868111L005"] [product="similar to predicted protein"] [strand="-"]	1
pda-miR167a	PDK_30s667851g002	3	24.996	1	20	339	358	UGAAGCUGCCAGCAUGAUCU	AGAGGAUGCUGUCAGCUUCA	Translation	[locus_tag="PDK_30s667851L002"] [product="nad h:quinone oxidoreductase"] [strand="-"]	1
pda-miR167a	PDK_30s885901g004	3	19.313	1	20	434	453	UGAAGCUGCCAGCAUGAUCU	AGAUCAUCCGUGCAGCUUCA	Translation	[locus_tag="PDK_30s885901L004"] [product="partial gene, no protein identified"] [strand="+"]	1
pda-miR167a_R+2_1ss21AG	PDK_30s886891g002	3	18.061	1	20	983	1002	UGAAGCUGCCAGCAUGAUCU	AGAUCAUCUUGGUAGCUUUG	Cleavage	[locus_tag="PDK_30s886891L002"] [product="retrotransposon ty3-gypsy subclass"] [strand="-"]	1
pda-miR167a_R+2_1ss21AG	PDK_30s1201081g001	3	14.943	1	21	493	513	UGAAGCUGCCAGCAUGAUCUG	UAUAUUAUCUUGGCAGCUUCA	Cleavage	[locus_tag="PDK_30s1201081L001"] [product="f-box-containing protein 2"] [strand="+"]	1
pda-miR397-p3_1ss6GA	PDK_30s852831g001	3	23.101	1	21	2058	2078	CCAGCACUGCACUCAAUCAUG	UGUGGUUGAGUUCAGUGCUGA	Translation	[locus_tag="PDK_30s852831L001"] [product="similar to predicted protein"] [strand="+"]	1
pda-miR397-p3_1ss6GA	PDK_30s1050381g008	3	17.113	1	20	1499	1518	CCAGCACUGCACUCAAUCAU	AUGAUGGAGUUCAGUGCUGU	Translation	[locus_tag="PDK_30s1050381L008"] [product="partial gene, no protein identified"] [strand="-"]	1
pda-miR394a-5p_1ss19CT	PDK_30s1008061g001	0.5	24.438	1	20	906	925	UUGGCAUUCUGUCCACCUUC	GGAGGUGGACAGAAUGCCAA	Cleavage	[locus_tag="PDK_30s1008061L001"] [product="partial gene, no protein identified"] [strand="+"]	1
pda-miR394a-5p_1ss19CT	PDK_30s806321g007	2	18.555	1	20	166	185	UUGGCAUUCUGUCCACCUUC	GAAGGUGGACAAGAUGUCAA	Translation	[locus_tag="PDK_30s806321L007"] [product="peroxin pex14"] [strand="+"]	1
pda-miR394a-5p_1ss19CT	PDK_30s846891g001	2.5	16.109	1	20	1320	1339	UUGGCAUUCUGUCCACCUUC	GAAGGAGGACAUAAUGCCAG	Translation	[locus_tag="PDK_30s846891L001"] [product="similar to predicted protein"] [strand="+"]	1
pda-miR394a-5p_1ss19CT	PDK_30s885271g002	3	19.318	1	20	599	618	UUGGCAUUCUGUCCACCUUC	GGUGUUGGACAGGAUGCCAA	Cleavage	[locus_tag="PDK_30s885271L002"] [product="pentatricopeptide repeat-containing"] [strand="+"]	1
pda-miR529e_1ss21CA	PDK_30s756061g001	1.5	16.372	1	20	670	689	AGAAGAGAGAGAGUACAGCC	AGCUGUGCUCUCUCUCUUCU	Cleavage	[locus_tag="PDK_30s756061L001"] [product="partial gene, no protein identified"] [strand="+"]	1
pda-miR529e_1ss21CA	PDK_30s772931g003	2	13.697	1	21	441	461	AGAAGAGAGAGAGUACAGCCA	UGAUUGUGCUCUCUCUCUUCU	Cleavage	[locus_tag="PDK_30s772931L003"] [product="partial gene, no protein identified"] [strand="+"]	1
pda-miR529e_1ss21CA	PDK_30s774191g002	2.5	20.457	1	21	1241	1261	AGAAGAGAGAGAGUACAGCCA	UGGUUGAACUCUCUCUCUUCA	Cleavage	[locus_tag="PDK_30s774191L002"] [product="abscisic acid responsive elements-bindingfactor"] [strand="-"]	1
pda-miR529e_1ss21CA	PDK_30s704101g001	2.5	17.648	1	20	213	232	AGAAGAGAGAGAGUACAGCC	AGCUGUGCUCUCUCUCUUCG	Cleavage	[locus_tag="PDK_30s704101L001"] [product="partial gene, no protein identified"] [strand="-"]	1
pda-miR529e_1ss21CA	PDK_30s1025931g001	3	21.478	1	20	588	607	AGAAGAGAGAGAGUACAGCC	GGCCGUGCUCUUCCUCUUCU	Cleavage	[locus_tag="PDK_30s1025931L001"] [product="partial gene, no protein identified"] [strand="+"]	1
pda-miR529e_1ss21CA	PDK_30s905141g003	3	17.681	1	20	1918	1937	AGAAGAGAGAGAGUACAGCC	GGCUGAACUCGCUUUCUUUU	Translation	[locus_tag="PDK_30s905141L003"] [product="partial gene, no protein identified"] [strand="-"]	1
pda-miR6424-p3_1ss2GC	PDK_30s1197031g001	2.5	24.919	1	20	1954	1973	UCGUGCCACGCUGUGUGCGU	ACGCAUGCAGCAUGGUACGA	Translation	[locus_tag="PDK_30s1197031L001"] [product="partial gene, no protein identified"] [strand="+"]	1
pda-miR167-3p_2ss10GT20CT	PDK_30s1137981g001	3	15.613	1	21	490	510	AGAUCAUGUUGCAGUUUCAUC	GAUGAAACUGCAUCAUGGUUC	Translation	[locus_tag="PDK_30s1137981L001"] [product="helix-loop-helix dna-binding domain containingexpressed"] [strand="+"]	1
pda-miR167-3p_2ss10GT20CT	PDK_30s861301g001	3	11.173	1	20	21	40	AGAUCAUGUUGCAGUUUCAU	AUGCAACUGCAACUUGAUUU	Cleavage	[locus_tag="PDK_30s861301L001"] [product="partial gene, no protein identified"] [strand="+"]	1
pda-miR167-3p_2ss10GT20CT	PDK_30s1098691g002	3	21.48	1	20	1001	1019	AGAUCAUGUUGCAGUUUCAU	AUGAAACUGCAACA-GAUUU	Cleavage	[locus_tag="PDK_30s1098691L002"] [product="bri1-kd interacting protein"] [strand="+"]	1
pda-miR169b-3p_2ss15C-22AC	PDK_30s983881g003	3	17.574	1	20	707	726	GGCAAGUUGUCCUUGGCUAC	GUAACCAAGGAAAAUUUGCU	Translation	[locus_tag="PDK_30s983881L003"] [product="puromycin-sensitive aminopeptidase"] [strand="+"]	1
pda-miR4376-p5_1ss2AT	PDK_30s740551g019	2.5	22.931	1	20	595	614	UUCGCAGGAGAGAUGAUGCU	AGCAUCAUUGCUCUUGCGAG	Translation	[locus_tag="PDK_30s740551L019"] [product="endoplasmic reticulum"] [strand="-"]	1
pda-miR4376-p5_1ss2AT	PDK_30s838351g003	3	17.079	1	20	12	31	UUCGCAGGAGAGAUGAUGCU	AGCAUUAUCUAUUCUGCGGG	Translation	[locus_tag="PDK_30s838351L003"] [product="type-b response regulator"] [strand="+"]	1
pda-miR4376-p5_1ss2AT	PDK_30s884771g003	3	17.211	1	20	256	274	UUCGCAGGAGAGAUGAUGCU	AGCAUCAUCUC-CUUGUGAA	Translation	[locus_tag="PDK_30s884771L003"] [product="calcium calmodulin-dependent protein kinase"] [strand="-"]	1
pda-miR156g-5p_2ss13AG17GA	PDK_30s789261g002	1.5	23.842	1	21	248	268	UUGACAGAAGAUGGAGAGCAC	GUGCUCUCUCUCUUCUGUCAA	Cleavage	[locus_tag="PDK_30s789261L002"] [product="partial gene, no protein identified"] [strand="+"]	1
pda-miR156g-5p_2ss13AG17GA	PDK_30s756061g001	1.5	21.536	1	21	674	694	UUGACAGAAGAUGGAGAGCAC	GUGCUCUCUCUCUUCUGUCAA	Cleavage	[locus_tag="PDK_30s756061L001"] [product="partial gene, no protein identified"] [strand="+"]	1
pda-miR156g-5p_2ss13AG17GA	PDK_30s882821g001	1.5	20.571	1	21	1365	1385	UUGACAGAAGAUGGAGAGCAC	GUGCUCUCUCUCUUCUGUCAA	Cleavage	[locus_tag="PDK_30s882821L001"] [product="partial gene, no protein identified"] [strand="+"]	1
pda-miR156g-5p_2ss13AG17GA	PDK_30s772931g003	2.5	15.287	1	21	446	466	UUGACAGAAGAUGGAGAGCAC	GUGCUCUCUCUCUUCUGUCAU	Cleavage	[locus_tag="PDK_30s772931L003"] [product="partial gene, no protein identified"] [strand="+"]	1
pda-miR156g-5p_2ss13AG17GA	PDK_30s670584g001	2.5	21.572	1	21	386	406	UUGACAGAAGAUGGAGAGCAC	GUGCUUCCUAUUUUCUGUCAA	Cleavage	[locus_tag="PDK_30s670584L001"] [product="3-hydroxyisobutyryl-coenzyme a expressed"] [strand="+"]	1
pda-miR156g-5p_2ss13AG17GA	PDK_30s814451g001	2.5	17.988	1	20	270	289	UUGACAGAAGAUGGAGAGCA	UGUUCUCCAUUUUUUGUUGA	Cleavage	[locus_tag="PDK_30s814451L001"] [product="mgdg synthase type a"] [strand="+"]	1
pda-miR156g-5p_2ss13AG17GA	PDK_30s704101g001	3	17.093	1	21	217	237	UUGACAGAAGAUGGAGAGCAC	GUGCUCUCUCUCUUCGGUCAA	Cleavage	[locus_tag="PDK_30s704101L001"] [product="partial gene, no protein identified"] [strand="-"]	1
pda-miR156g-5p_2ss13AG17GA	PDK_30s866631g001	2.5	19.01	1	20	97	116	UUGACAGAAGAUGGAGAGCA	UUCUCUCCAUUUUCUGUUGA	Cleavage	[locus_tag="PDK_30s866631L001"] [product="partial gene, no protein identified"] [strand="-"]	1
pda-miR156g-5p_2ss13AG17GA	PDK_30s961831g005	3	9.861	1	21	1117	1137	UUGACAGAAGAUGGAGAGCAC	GUGCCUUCCAUUUACUGUCAA	Cleavage	[locus_tag="PDK_30s961831L005"] [product="beta 3 galactosyltransferase"] [strand="-"]	1
pda-miR156g-5p_2ss13AG17GA	PDK_30s1164261g002	3	20.784	1	20	371	390	UUGACAGAAGAUGGAGAGCA	UGCUAUCCGUCUUCUGUUAC	Cleavage	[locus_tag="PDK_30s1164261L002"] [product="cationic amino acid transporter"] [strand="+"]	1
pda-miR156g-5p_2ss13AG17GA	PDK_30s703451g009	2.5	7.616	1	20	596	615	UUGACAGAAGAUGGAGAGCA	UGCACUCCUUUUUCUGUCAA	Cleavage	[locus_tag="PDK_30s703451L009"] [product="-alpha-glucan branching"] [strand="-"]	1
pda-miR156g-5p_2ss13AG17GA	PDK_30s928741g002	3	11.671	1	20	425	444	UUGACAGAAGAUGGAGAGCA	UGCUCUUCAUCUGCUGUGAA	Cleavage	[locus_tag="PDK_30s928741L002"] [product="cytokinin oxidase"] [strand="-"]	1
pda-miR156c_1ss13AG	PDK_30s789261g002	1.5	23.842	1	21	248	268	UUGACAGAAGAUGGAGAGCAC	GUGCUCUCUCUCUUCUGUCAA	Cleavage	[locus_tag="PDK_30s789261L002"] [product="partial gene, no protein identified"] [strand="+"]	1
pda-miR156c_1ss13AG	PDK_30s756061g001	1.5	21.536	1	21	674	694	UUGACAGAAGAUGGAGAGCAC	GUGCUCUCUCUCUUCUGUCAA	Cleavage	[locus_tag="PDK_30s756061L001"] [product="partial gene, no protein identified"] [strand="+"]	1
pda-miR156c_1ss13AG	PDK_30s882821g001	1.5	20.571	1	21	1365	1385	UUGACAGAAGAUGGAGAGCAC	GUGCUCUCUCUCUUCUGUCAA	Cleavage	[locus_tag="PDK_30s882821L001"] [product="partial gene, no protein identified"] [strand="+"]	1
pda-miR156c_1ss13AG	PDK_30s772931g003	2.5	15.287	1	21	446	466	UUGACAGAAGAUGGAGAGCAC	GUGCUCUCUCUCUUCUGUCAU	Cleavage	[locus_tag="PDK_30s772931L003"] [product="partial gene, no protein identified"] [strand="+"]	1
pda-miR156c_1ss13AG	PDK_30s670584g001	2.5	21.572	1	21	386	406	UUGACAGAAGAUGGAGAGCAC	GUGCUUCCUAUUUUCUGUCAA	Cleavage	[locus_tag="PDK_30s670584L001"] [product="3-hydroxyisobutyryl-coenzyme a expressed"] [strand="+"]	1
pda-miR156c_1ss13AG	PDK_30s814451g001	2.5	17.988	1	20	270	289	UUGACAGAAGAUGGAGAGCA	UGUUCUCCAUUUUUUGUUGA	Cleavage	[locus_tag="PDK_30s814451L001"] [product="mgdg synthase type a"] [strand="+"]	1
pda-miR156c_1ss13AG	PDK_30s704101g001	3	17.093	1	21	217	237	UUGACAGAAGAUGGAGAGCAC	GUGCUCUCUCUCUUCGGUCAA	Cleavage	[locus_tag="PDK_30s704101L001"] [product="partial gene, no protein identified"] [strand="-"]	1
pda-miR156c_1ss13AG	PDK_30s866631g001	2.5	19.01	1	20	97	116	UUGACAGAAGAUGGAGAGCA	UUCUCUCCAUUUUCUGUUGA	Cleavage	[locus_tag="PDK_30s866631L001"] [product="partial gene, no protein identified"] [strand="-"]	1
pda-miR156c_1ss13AG	PDK_30s961831g005	3	9.861	1	21	1117	1137	UUGACAGAAGAUGGAGAGCAC	GUGCCUUCCAUUUACUGUCAA	Cleavage	[locus_tag="PDK_30s961831L005"] [product="beta 3 galactosyltransferase"] [strand="-"]	1
pda-miR156c_1ss13AG	PDK_30s1164261g002	3	20.784	1	20	371	390	UUGACAGAAGAUGGAGAGCA	UGCUAUCCGUCUUCUGUUAC	Cleavage	[locus_tag="PDK_30s1164261L002"] [product="cationic amino acid transporter"] [strand="+"]	1
pda-miR156c_1ss13AG	PDK_30s703451g009	2.5	7.616	1	20	596	615	UUGACAGAAGAUGGAGAGCA	UGCACUCCUUUUUCUGUCAA	Cleavage	[locus_tag="PDK_30s703451L009"] [product="-alpha-glucan branching"] [strand="-"]	1
pda-miR156c_1ss13AG	PDK_30s928741g002	3	11.671	1	20	425	444	UUGACAGAAGAUGGAGAGCA	UGCUCUUCAUCUGCUGUGAA	Cleavage	[locus_tag="PDK_30s928741L002"] [product="cytokinin oxidase"] [strand="-"]	1
pda-miR157d-3p_1ss17TC	PDK_30s680571g004	2	17.671	1	20	1	20	GCUCUCUAUGCUUCUGCCAU	AUGGCAGAAGCAAAGGGAGU	Cleavage	[locus_tag="PDK_30s680571L004"] [product="partial gene, no protein identified"] [strand="+"]	1
pda-miR157d-3p_1ss17TC	PDK_30s65509163g004	3	20.953	1	20	719	738	GCUCUCUAUGCUUCUGCCAU	AUAGCACAAGCAUGGAGAGU	Cleavage	[locus_tag="PDK_30s65509163L004"] [product="glycosyltransferase family 14 protein core-2i-branching enzyme family protein"] [strand="-"]	1
pda-5p-274880_21	PDK_30s65509337g001	2	16.786	1	24	542	565	AAUUGUACACAGAGAAUACUUAAC	GUUAUUUAUUCUCUGUGUACAAUU	Cleavage	[locus_tag="PDK_30s65509337L001"] [product="phd-finger family expressed"] [strand="+"]	1
pda-5p-274880_21	PDK_30s1164071g003	2.5	9.835	1	23	53	75	AAUUGUACACAGAGAAUACUUAA	UGAAAUAUUUUUUGUGUAUAAUU	Cleavage	[locus_tag="PDK_30s1164071L003"] [product="tpl protein binding protein homodimerizationtranscription repressor"] [strand="-"]	1
pda-5p-367016_14	PDK_30s1139331g004	2	19.932	1	20	841	860	CCUUCUGUUCGGCUGCACAG	GUGCGCAGCCGAACAGAAGG	Cleavage	[locus_tag="PDK_30s1139331L004"] [product="at1g18740 f6a14_15"] [strand="+"]	1
pda-5p-367016_14	PDK_30s893951g004	3	19.059	1	21	327	347	CCUUCUGUUCGGCUGCACAGU	ACUGUGCACCAGAAUAGGAGG	Translation	[locus_tag="PDK_30s893951L004"] [product="partial gene, no protein identified"] [strand="-"]	1
pda-5p-110153_92	PDK_30s877611g002	3	19.489	1	21	524	544	UUGGAGAACUCUAGCCUAUGC	GCAUAGGCUAGAGCUCUCUCA	Cleavage	[locus_tag="PDK_30s877611L002"] [product="protein phosphatase"] [strand="-"]	1
pda-5p-110153_92	PDK_30s735491g001	3	23.376	1	20	304	323	UUGGAGAACUCUAGCCUAUG	UAUGGGCUUGAGCUCUCCAA	Cleavage	[locus_tag="PDK_30s735491L001"] [product="similar to predicted protein"] [strand="+"]	1
pda-3p-250092_25	PDK_30s984331g001	3	21.239	1	20	521	540	UUAAGUGAAGUCGGCAACCG	CGACUGCUGACUUCAUUUAA	Cleavage	[locus_tag="PDK_30s984331L001"] [product="Os03g0112800"] [strand="+"]	1
pda-5p-321868_17	PDK_30s700771g006	3	19.122	1	22	234	255	AGGGCUGGAGUCGACUCCUGCA	UGCCGGAGUUGAUCCCAGCCCU	Translation	[locus_tag="PDK_30s700771L006"] [product="extracellular calcium sensing receptor"] [strand="+"]	1
pda-5p-321868_17	PDK_30s746701g003	3	21.012	1	20	550	569	AGGGCUGGAGUCGACUCCUG	AAGGAGUCGGUUUCAGCCUU	Cleavage	[locus_tag="PDK_30s746701L003"] [product="unnamed protein product"] [strand="+"]	1
pda-5p-400528_12-R13	PDK_30s739461g002	3	14.913	1	20	778	797	AAUUAAGUCUUCUCUGCACA	UGUGUAGAGGAGGCUUACUU	Cleavage	[locus_tag="PDK_30s739461L002"] [product="similar to predicted protein"] [strand="+"]	1
pda-5p-104109_100	PDK_30s784721g001	3	15.413	1	23	1165	1187	AGUGAAAGUCGGCAAACCAAUUG	UGAUUCGUUUGAUGACUUUCAUU	Cleavage	[locus_tag="PDK_30s784721L001"] [product="pentatricopeptide repeat-containing protein"] [strand="-"]	1
pda-5p-104109_100	PDK_30s1021181g001	3	16.942	1	24	1651	1675	AGUGAAAGUC-GGCAAACCAAUUGC	GGAACUGGUUUGCCAGAUUUUCAUU	Translation	[locus_tag="PDK_30s1021181L001"] [product="partial gene, no protein identified"] [strand="+"]	1
pda-3p-228238_28-R15	PDK_30s677091g001	3	14.689	1	21	2444	2464	ACGCUUAAAAGCGUCGGCAUA	UAUCCUGGCGGUUUUAAGCGU	Translation	[locus_tag="PDK_30s677091L001"] [product="partial gene, no protein identified"] [strand="-"]	1
pda-3p-228238_28-R15	PDK_30s995921g001	3	23.582	1	20	254	273	ACGCUUAAAAGCGUCGGCAU	CUGCCGGCGCUCUUGAGCGU	Translation	[locus_tag="PDK_30s995921L001"] [product="late embryogenesis abundant protein lea14-a"] [strand="-"]	1
pda-3p-437970_11	PDK_30s655381g001	2.5	21.48	1	20	652	671	UCGCCUGCUGCAGCCUCCGC	GCGGAGGUUGCGGUAGGUGG	Cleavage	[locus_tag="PDK_30s655381L001"] [product="similar to predicted protein"] [strand="-"]	1
pda-3p-437970_11	PDK_30s1116851g003	3	21.837	1	21	5	25	UCGCCUGCUGCAGCCUCCGCC	GGCGGAGGCGGCAGUAAGCGA	Cleavage	[locus_tag="PDK_30s1116851L003"] [product="partial gene, no protein identified"] [strand="-"]	1
pda-3p-437970_11	PDK_30s879181g002	3	15.129	1	20	265	284	UCGCCUGCUGCAGCCUCCGC	GCGGAGGAUGCGGCAGGAGA	Cleavage	[locus_tag="PDK_30s879181L002"] [product="partial gene, no protein identified"] [strand="+"]	1
pda-5p-264205_23	PDK_30s954101g001	3	16.807	1	21	342	362	UUUUUGCAAUAAUGCCCCUUC	GGAGGGGUAUUAUGGCGAAAG	Cleavage	[locus_tag="PDK_30s954101L001"] [product="cytochrome p450"] [strand="-"]	1
pda-5p-264205_23	PDK_30s1077111g001	3	22.393	1	21	526	546	UUUUUGCAAUAAUGCCCCUUC	GGAUGGGCAUUGUUGUAGAAA	Cleavage	[locus_tag="PDK_30s1077111L001"] [product="snf2 histone linker phd ring helicase"] [strand="-"]	1
pda-5p-264205_23	PDK_30s1015301g001	2.5	15.107	1	21	1095	1115	UUUUUGCAAUAAUGCCCCUUC	GAAGGGACAUUGGUGCAAAAA	Translation	[locus_tag="PDK_30s1015301L001"] [product="coiled-coil domain containing 22"] [strand="+"]	1
pda-5p-264205_23	PDK_30s1187611g001	2.5	14.258	1	21	1507	1527	UUUUUGCAAUAAUGCCCCUUC	GAAGGGACAUUGGUGCAAAAA	Translation	[locus_tag="PDK_30s1187611L001"] [product="coiled-coil domain containing 22"] [strand="+"]	1
pda-5p-264205_23	PDK_30s759641g001	2.5	21.9	1	20	1433	1452	UUUUUGCAAUAAUGCCCCUU	AAGGGGUAUUCUUGCAGAAG	Translation	[locus_tag="PDK_30s759641L001"] [product="purple acid phosphatase"] [strand="+"]	1
pda-5p-264205_23	PDK_30s65509170g001	3	16.242	1	20	528	547	UUUUUGCAAUAAUGCCCCUU	CAGUGUCAUUAUUGCAAAAA	Cleavage	[locus_tag="PDK_30s65509170L001"] [product="retrotransposon unclassified"] [strand="+"]	1
pda-5p-264205_23	PDK_30s1064701g001	3	22.305	1	20	729	748	UUUUUGCAAUAAUGCCCCUU	GAGGGCCACUGUUGCAAAAA	Cleavage	[locus_tag="PDK_30s1064701L001"] [product="nucleolar protein gar2-related"] [strand="+"]	1
pda-5p-360119_14	PDK_30s1100981g005	1	20.006	1	21	1204	1224	AGGAAGAGCUCCGCCUUGGUU	GAUCAAGGUGGAGCUCUUCCU	Cleavage	[locus_tag="PDK_30s1100981L005"] [product="partial gene, no protein identified"] [strand="+"]	1
pda-5p-482466_10	PDK_30s974151g011	3	16.551	1	22	411	432	AGAGACAGGGUUCGAACUCAGA	UCUGAAUUCGAAAUCUGUUUCU	Translation	[locus_tag="PDK_30s974151L011"] [product="partial gene, no protein identified"] [strand="+"]	1
pda-3p-296980_19	PDK_30s667031g001	3	19.603	1	23	359	381	ACACUUUAGAAAGCAUCGUCGAA	UUUGGUGAUGCUUUAGAAAGUGU	Translation	[locus_tag="PDK_30s667031L001"] [product="partial gene, no protein identified"] [strand="+"]	1
pda-3p-398260_13	PDK_30s888011g002	2	16.09	1	20	862	881	CCAGCGCUGCAUUCGAUAAU	AUUAUCGAGUGCAGCGUUGA	Cleavage	[locus_tag="PDK_30s888011L002"] [product="partial gene, no protein identified"] [strand="-"]	1
pda-3p-398260_13	PDK_30s732171g004	2.5	22.556	1	20	1015	1034	CCAGCGCUGCAUUCGAUAAU	GUUAUCGAGUGCAGCGUUGA	Cleavage	[locus_tag="PDK_30s732171L004"] [product="laccase 110a"] [strand="-"]	1
pda-3p-398260_13	PDK_30s807521g002	3	14.619	1	20	151	170	CCAGCGCUGCAUUCGAUAAU	AUUAUUGACUGCAGCGUUGA	Cleavage	[locus_tag="PDK_30s807521L002"] [product="laccase 110a"] [strand="-"]	1
pda-3p-228238_28	PDK_30s677091g001	3	14.689	1	21	2444	2464	ACGCUUAAAAGCGUCGGCAUA	UAUCCUGGCGGUUUUAAGCGU	Translation	[locus_tag="PDK_30s677091L001"] [product="partial gene, no protein identified"] [strand="-"]	1
pda-3p-228238_28	PDK_30s995921g001	3	23.582	1	20	254	273	ACGCUUAAAAGCGUCGGCAU	CUGCCGGCGCUCUUGAGCGU	Translation	[locus_tag="PDK_30s995921L001"] [product="late embryogenesis abundant protein lea14-a"] [strand="-"]	1
pda-5p-190444_38	PDK_30s872941g001	2.5	13.995	1	24	360	383	AUUUGCUAGUGUUGUGGUACUUGG	CUAUGUACCACAACAGCAGCAGAU	Translation	[locus_tag="PDK_30s872941L001"] [product="nuclear transcription factor y subunit c-2"] [strand="+"]	1
pda-5p-190444_38	PDK_30s707661g002	3	14.655	1	23	2045	2066	AUUUGCUAGUGUUGUGGUACUUG	UAAGUACCACAGUAC-AGCAAAU	Cleavage	[locus_tag="PDK_30s707661L002"] [product="tpa_inf: class iv hd-zip protein hdz44"] [strand="+"]	1
pda-5p-190444_38	PDK_30s998471g001	3	18.14	1	21	472	492	AUUUGCUAGUGUUGUGGUACU	AGUGCAAUAACACGAGCAAAU	Cleavage	[locus_tag="PDK_30s998471L001"] [product="ras-related protein rab-18"] [strand="+"]	1
pda-3p-386334_13	PDK_30s667791g003	3	13.505	1	22	536	557	AGCCUAUGUGGACUAAAGGACA	UCUUCCUUAGUCCACAUAGGAU	Cleavage	[locus_tag="PDK_30s667791L003"] [product="dna methyltransferase 1-associated protein"] [strand="-"]	1
pda-5p-426126_11	PDK_30s703171g006	3	24.565	1	22	590	611	UUUUGGACCCAGACCCAACCCG	UGGGUUUGGUCUGGGUUUGAGA	Cleavage	[locus_tag="PDK_30s703171L006"] [product="dna binding"] [strand="-"]	1
pda-3p-200031_35	PDK_30s967931g001	2.5	19.903	1	20	2524	2543	CCCGACUUGCAUCAACUGAG	UGCAGUUGAUGCAAGUUGGG	Cleavage	[locus_tag="PDK_30s967931L001"] [product="esp4 (enhanced silencing phenotype 4) binding"] [strand="-"]	1
pda-5p-276361_21	PDK_30s666771g006	3	14.589	1	21	957	977	UCUGUCGCAGGAGAGAUGAUG	CAUCAUCUCUCUUGCAGCAGG	Cleavage	[locus_tag="PDK_30s666771L006"] [product="serine-threonine kinase"] [strand="+"]	1
pda-5p-276361_21	PDK_30s888931g001	2.5	21.517	1	20	1240	1259	UCUGUCGCAGGAGAGAUGAU	AUUAUCUCUCUUGCGACGGC	Cleavage	[locus_tag="PDK_30s888931L001"] [product="s-receptor kinase"] [strand="+"]	1
pda-5p-276361_21	PDK_30s1008081g001	2.5	23.955	1	21	951	971	UCUGUCGCAGGAGAGAUGAUG	UAUCAUCUCUCUUUCGGCAGG	Cleavage	[locus_tag="PDK_30s1008081L001"] [product="serine-threonine kinase"] [strand="+"]	1
pda-5p-370156_14	PDK_30s897571g001	3	16.527	1	24	1729	1752	ACCAUUCGCUUCCUGGUAGGUGUG	CACAUCUACAAGGAAGCGAAUUGU	Cleavage	[locus_tag="PDK_30s897571L001"] [product="partial gene, no protein identified"] [strand="+"]	1
pda-5p-364804_14	PDK_30s722171g011	3	22.813	1	24	236	259	AGUGCUGUGCAUCCUUGGAUGACC	GGUGGUCCAAGAUUGCGCAGCACU	Cleavage	[locus_tag="PDK_30s722171L011"] [product="typical p-type r2r3 myb protein"] [strand="+"]	1
pda-5p-364804_14	PDK_30s904561g004	3	16.751	1	21	628	649	AGUGCUGUG-CAUCCUUGGAUG	UAUCCAAGGAUGACAUAGUACU	Translation	[locus_tag="PDK_30s904561L004"] [product="calmodulin-domain protein kinase cdpk isoform 5"] [strand="-"]	1
pda-5p-364804_14	PDK_30s913641g002	3	18.141	1	21	1107	1127	AGUGCUGUGCAUCCUUGGAUG	CAUCCUUGGAGGCACAGCACU	Translation	[locus_tag="PDK_30s913641L002"] [product="atp-binding cassette"] [strand="+"]	1
pda-5p-364804_14	PDK_30s801031g001	3	13.87	1	20	15	34	AGUGCUGUGCAUCCUUGGAU	AUUAGAGGAUUCACAGCACU	Translation	[locus_tag="PDK_30s801031L001"] [product="partial gene, no protein identified"] [strand="+"]	1
pda-3p-329752_16	PDK_30s665961g001	3	16.089	1	20	266	285	AAACAGGUCAGACAUAUAAA	UUUAUUAGUCUAACCUGUUU	Translation	[locus_tag="PDK_30s665961L001"] [product="hypothetical protein"] [strand="-"]	1
pda-3p-313542_18	PDK_30s1047211g001	3	18.128	1	22	781	802	UUUUGUUCGGCGGUCCAGUGCC	GCUGCUGGACUGCGGAACAGAA	Translation	[locus_tag="PDK_30s1047211L001"] [product="quinone oxidoreductase"] [strand="+"]	1
pda-3p-313542_18	PDK_30s722271g001	3	8.142	1	20	1035	1054	UUUUGUUCGGCGGUCCAGUG	CACUGAACUGCCGAAGAAAA	Cleavage	[locus_tag="PDK_30s722271L001"] [product="zinc finger"] [strand="-"]	1
pda-3p-313542_18	PDK_30s740851g002	3	21.347	1	20	73	92	UUUUGUUCGGCGGUCCAGUG	CACUGCAUCGCCGGGCAGAA	Cleavage	[locus_tag="PDK_30s740851L002"] [product="wrky transcription"] [strand="+"]	1
pda-5p-353741_15	PDK_30s835241g004	2.5	13.677	1	22	120	141	AUUGAGAUGUUUGGGGACCUGG	CAAGGUCCCCAAAGAUCUGAAU	Translation	[locus_tag="PDK_30s835241L004"] [product="similar to predicted protein"] [strand="-"]	1
pda-5p-353741_15	PDK_30s839611g001	3	8.254	1	23	3791	3813	AUUGAGAUGUUUGGGGACCUGGU	AUAAGCUUCCCAAAUAUUUCAGU	Cleavage	[locus_tag="PDK_30s839611L001"] [product="frs3 (far1-related sequence 3) zinc ion binding"] [strand="-"]	1
pda-5p-418800_12	PDK_30s1185661g002	2	11.634	1	20	2037	2056	GCUACUGUCAGAAGAUGAAU	AUUCAUCUUCAGACAGUGGU	Translation	[locus_tag="PDK_30s1185661L002"] [product="partial gene, no protein identified"] [strand="-"]	1
pda-5p-418800_12	PDK_30s1179721g001	3	14.73	1	24	386	409	GCUACUGUCAGAAGAUGAAUGCCU	AGUAAUUCAUCCUAUGACAGUAGA	Translation	[locus_tag="PDK_30s1179721L001"] [product="leucine-rich repeat containing"] [strand="-"]	1
pda-5p-418800_12	PDK_30s692911g001	3	14.813	1	20	2157	2176	GCUACUGUCAGAAGAUGAAU	AUUCAUCAUCUGAUAGAAGC	Cleavage	[locus_tag="PDK_30s692911L001"] [product="sister-chromatide cohesion protein"] [strand="-"]	1
pda-5p-217347_31	PDK_30s656531g001	2.5	21.734	1	21	93	113	CCUGAAUCUGGUCUUUUGGUG	UACCAGAGGACCAGAUGCAGG	Cleavage	[locus_tag="PDK_30s656531L001"] [product="xyloglucan endotransglycosylase"] [strand="-"]	1
pda-5p-217347_31	PDK_30s776891g001	3	22.241	1	21	165	185	CCUGAAUCUGGUCUUUUGGUG	CACCGGAGGACCAGAUGCAGG	Cleavage	[locus_tag="PDK_30s776891L001"] [product="xyloglucan endotransglycosylase"] [strand="-"]	1
pda-5p-217347_31	PDK_30s868961g004	2.5	16.364	1	20	479	498	CCUGAAUCUGGUCUUUUGGU	ACCAAACGGCCUGAUUCAGG	Translation	[locus_tag="PDK_30s868961L004"] [product="o-methyltransferase family protein"] [strand="-"]	1
pda-5p-217347_31-R5	PDK_30s656531g001	2.5	21.734	1	21	93	113	CCUGAAUCUGGUCUUUUGGUG	UACCAGAGGACCAGAUGCAGG	Cleavage	[locus_tag="PDK_30s656531L001"] [product="xyloglucan endotransglycosylase"] [strand="-"]	1
pda-5p-217347_31-R5	PDK_30s776891g001	3	22.241	1	21	165	185	CCUGAAUCUGGUCUUUUGGUG	CACCGGAGGACCAGAUGCAGG	Cleavage	[locus_tag="PDK_30s776891L001"] [product="xyloglucan endotransglycosylase"] [strand="-"]	1
pda-5p-217347_31-R5	PDK_30s868961g004	2.5	16.364	1	20	479	498	CCUGAAUCUGGUCUUUUGGU	ACCAAACGGCCUGAUUCAGG	Translation	[locus_tag="PDK_30s868961L004"] [product="o-methyltransferase family protein"] [strand="-"]	1
pda-5p-148449_56	PDK_30s922321g001	2.5	11.922	1	22	76	97	UUUUGCUGAUGGUCAUCUAAUC	GAUAAGAUAAUCAUCAGCAAAA	Cleavage	[locus_tag="PDK_30s922321L001"] [product="partial gene, no protein identified"] [strand="-"]	1
pda-5p-396570_13	PDK_30s854261g002	3	22.85	1	20	25	44	AGAGUCGUGCGGUCUACAGA	UCUGUAGAGAGCAUGGCUCU	Translation	[locus_tag="PDK_30s854261L002"] [product="glycerol-3-phosphate dehydrogenase"] [strand="-"]	1
pda-5p-239350_26	PDK_30s904561g014	1	12.329	1	25	190	214	CAUGAAGGAUCAUCUCUGCUUUACU	ACUGCAGCAAAGAUGAUCCUUCAUG	Cleavage	[locus_tag="PDK_30s904561L014"] [product="partial gene, no protein identified"] [strand="+"]	1
pda-5p-239350_26	PDK_30s851441g001	2.5	24.383	1	23	36	59	CAUGAAGG-AUCAUCUCUGCUUUA	UGGAGCAGGGAUGAUACCUUCAUG	Translation	[locus_tag="PDK_30s851441L001"] [product="partial gene, no protein identified"] [strand="+"]	1
pda-5p-239350_26	PDK_30s1172411g001	3	15.685	1	22	217	238	CAUGAAGGAUCAUCUCUGCUUU	GAGGAAGAGAUUAUCCUUUAUG	Translation	[locus_tag="PDK_30s1172411L001"] [product="similar to predicted protein"] [strand="+"]	1
pda-3p-340060_16	PDK_30s868111g007	3	11.12	1	22	901	922	AAAUACUCAUUUGGGCAAGAUG	CGUCUUGUCCACAUGAGCAUUU	Translation	[locus_tag="PDK_30s868111L007"] [product="translational activator"] [strand="-"]	1
pda-3p-413562_12	PDK_30s1029101g001	3	14.814	1	23	666	688	AAUGGACAUGGAUACGAAUCGGA	UGUGAUUUGUGUCUGUGUCCAUG	Cleavage	[locus_tag="PDK_30s1029101L001"] [product="partial gene, no protein identified"] [strand="-"]	1
pda-miR172b-5p	PDK_30s1082091g001	3	20.388	1	20	2146	2165	GUAGCAUCAUCAAGAUUCAC	CUGAAUCUUGGUGAUGUUGU	Cleavage	[locus_tag="PDK_30s1082091L001"] [product="similar to predicted protein"] [strand="-"]	1
pda-miR172b-5p	PDK_30s1177571g003	3	16.769	1	20	700	719	GUAGCAUCAUCAAGAUUCAC	GUGAAUUUUGAUGGAGCUAU	Cleavage	[locus_tag="PDK_30s1177571L003"] [product="retrotransposon unclassified"] [strand="+"]	1
pda-miR172b-5p	PDK_30s987941g001	2.5	20.891	1	20	92	111	GUAGCAUCAUCAAGAUUCAC	GAGAAUCCUGAUGAUGCUGC	Cleavage	[locus_tag="PDK_30s987941L001"] [product="floral homeotic protein"] [strand="-"]	1
pda-miR172b-5p	PDK_30s831331g002	3	10.552	1	20	1468	1487	GUAGCAUCAUCAAGAUUCAC	GAGAAUUUUGAUGAAGCUAC	Cleavage	[locus_tag="PDK_30s831331L002"] [product="ac079280_6 transposon"] [strand="+"]	1
pda-miR172h-5p_R-1_2ss2CT7GT	PDK_30s1082091g001	3	20.388	1	20	2146	2165	GUAGCAUCAUCAAGAUUCAC	CUGAAUCUUGGUGAUGUUGU	Cleavage	[locus_tag="PDK_30s1082091L001"] [product="similar to predicted protein"] [strand="-"]	1
pda-miR172h-5p_R-1_2ss2CT7GT	PDK_30s1177571g003	3	16.769	1	20	700	719	GUAGCAUCAUCAAGAUUCAC	GUGAAUUUUGAUGGAGCUAU	Cleavage	[locus_tag="PDK_30s1177571L003"] [product="retrotransposon unclassified"] [strand="+"]	1
pda-miR172h-5p_R-1_2ss2CT7GT	PDK_30s987941g001	2.5	20.891	1	20	92	111	GUAGCAUCAUCAAGAUUCAC	GAGAAUCCUGAUGAUGCUGC	Cleavage	[locus_tag="PDK_30s987941L001"] [product="floral homeotic protein"] [strand="-"]	1
pda-miR172h-5p_R-1_2ss2CT7GT	PDK_30s831331g002	3	10.552	1	20	1468	1487	GUAGCAUCAUCAAGAUUCAC	GAGAAUUUUGAUGAAGCUAC	Cleavage	[locus_tag="PDK_30s831331L002"] [product="ac079280_6 transposon"] [strand="+"]	1
pda-miR394a-5p	PDK_30s1008061g001	0	24.438	1	20	906	925	UUGGCAUUCUGUCCACCUCC	GGAGGUGGACAGAAUGCCAA	Cleavage	[locus_tag="PDK_30s1008061L001"] [product="partial gene, no protein identified"] [strand="+"]	1
pda-miR394a-5p	PDK_30s855351g001	3	18.641	1	20	1033	1052	UUGGCAUUCUGUCCACCUCC	AGAGGUGGGCAGAAGGCCAA	Cleavage	[locus_tag="PDK_30s855351L001"] [product="dna binding"] [strand="+"]	1
pda-miR394a-5p	PDK_30s770751g001	3	20.627	1	20	277	296	UUGGCAUUCUGUCCACCUCC	GGAGGUGGGCAGAAUGCAAC	Cleavage	[locus_tag="PDK_30s770751L001"] [product="partial gene, no protein identified"] [strand="+"]	1
pda-miR394a-5p	PDK_30s885271g002	2.5	19.318	1	20	599	618	UUGGCAUUCUGUCCACCUCC	GGUGUUGGACAGGAUGCCAA	Cleavage	[locus_tag="PDK_30s885271L002"] [product="pentatricopeptide repeat-containing"] [strand="+"]	1
pda-miR394a-5p	PDK_30s806321g007	3	18.555	1	20	166	185	UUGGCAUUCUGUCCACCUCC	GAAGGUGGACAAGAUGUCAA	Translation	[locus_tag="PDK_30s806321L007"] [product="peroxin pex14"] [strand="+"]	1
pda-miR394a-5p	PDK_30s752251g001	3	16.564	1	20	775	794	UUGGCAUUCUGUCCACCUCC	GGAGGAGGAGACAAUGCCAA	Translation	[locus_tag="PDK_30s752251L001"] [product="alpha-glucan water chloroplast"] [strand="+"]	1
pda-miR168a_R+1	PDK_30s1043821g002	3	15.069	1	21	649	669	UCGCUUGGUGCAGGUCGGGAA	UUCCCAACUUGCAACAAGUGA	Cleavage	[locus_tag="PDK_30s1043821L002"] [product="partial gene, no protein identified"] [strand="-"]	1
pda-miR528-5p_R-1_1ss9GA	PDK_30s804191g003	2	12.781	1	20	793	812	UGGAAGGGACAUGCAGAGGA	UCUUCUGCAUAUCUCUUCCA	Translation	[locus_tag="PDK_30s804191L003"] [product="microtubule associated protein family expressed"] [strand="-"]	1
pda-miR528-5p_R-1_1ss9GA	PDK_30s1154711g002	3	9.736	1	20	198	217	UGGAAGGGACAUGCAGAGGA	UCCUCUGCAUGUCACCUCCA	Cleavage	[locus_tag="PDK_30s1154711L002"] [product="hexokinase 1"] [strand="-"]	1
pda-miR528-5p_R-1_1ss9GA	PDK_30s671741g004	2.5	23.531	1	20	944	963	UGGAAGGGACAUGCAGAGGA	UCCUUUGCAUUUUUCUUCCA	Translation	[locus_tag="PDK_30s671741L004"] [product="partial gene, no protein identified"] [strand="+"]	1
pda-miR528-5p_R-1_1ss9GA	PDK_30s1150541g003	3	14.254	1	20	214	233	UGGAAGGGACAUGCAGAGGA	GUCUCUGUAUCUCCCUUCCA	Translation	[locus_tag="PDK_30s1150541L003"] [product="similar to predicted protein"] [strand="-"]	1
pda-miR528-5p_R-1_1ss9GA	PDK_30s706291g001	3	12.29	1	20	780	799	UGGAAGGGACAUGCAGAGGA	UUCUUUGUAAGUUCCUUCCA	Translation	[locus_tag="PDK_30s706291L001"] [product="partial gene, no protein identified"] [strand="-"]	1
pda-miR528-5p_R-1_1ss9GA	PDK_30s877101g002	3	8.622	1	20	379	398	UGGAAGGGACAUGCAGAGGA	UCCUUUCCAUCUUCCUUCCA	Translation	[locus_tag="PDK_30s877101L002"] [product="similar to predicted protein"] [strand="-"]	1
pda-miR528-5p_R-1_1ss9GA	PDK_30s1074181g006	3	5.33	1	20	378	397	UGGAAGGGACAUGCAGAGGA	UCCUCUCCAUUUCUCUUUCA	Translation	[locus_tag="PDK_30s1074181L006"] [product="pax transcription activation domain interacting"] [strand="-"]	1
pda-miR528-5p_R-1_1ss9GA	PDK_30s749061g001	3	12.402	1	20	1646	1665	UGGAAGGGACAUGCAGAGGA	UCCUCUGCUUUUUUCUUCCA	Translation	[locus_tag="PDK_30s749061L001"] [product="leucyl-trna synthetase"] [strand="-"]	1
pda-miR528-5p_R-1_1ss9GA	PDK_30s910541g004	3	10.502	1	20	83	102	UGGAAGGGACAUGCAGAGGA	UUCCCUGCUUGUUCCUUCCA	Cleavage	[locus_tag="PDK_30s910541L004"] [product="kinesin-like calmodulin-binding protein"] [strand="-"]	1
pda-miR167a_R-1_1ss19CT	PDK_30s1142631g001	2.5	15.996	1	20	330	349	UGAAGCUGCCAGCAUGAUUU	GAAUUAUGUUGGGAGCUUCA	Cleavage	[locus_tag="PDK_30s1142631L001"] [product="similar to predicted protein"] [strand="-"]	1
pda-miR167a_R-1_1ss19CT	PDK_30s65509691g003	3	17.32	1	20	510	529	UGAAGCUGCCAGCAUGAUUU	AAAAUAUGCUGGUAGCUUUG	Cleavage	[locus_tag="PDK_30s65509691L003"] [product="ap2 domain transcription factor"] [strand="+"]	1
pda-miR167a_R-1_1ss19CT	PDK_30s1149451g003	3	14.698	1	20	409	428	UGAAGCUGCCAGCAUGAUUU	AAAUCGUUCUGACAGCUUUA	Translation	[locus_tag="PDK_30s1149451L003"] [product="partial gene, no protein identified"] [strand="-"]	1
pda-miR167a_R-1_1ss19CT	PDK_30s1201081g001	3	14.943	1	20	494	513	UGAAGCUGCCAGCAUGAUUU	AUAUUAUCUUGGCAGCUUCA	Cleavage	[locus_tag="PDK_30s1201081L001"] [product="f-box-containing protein 2"] [strand="+"]	1
pda-miR168a_1ss21AT	PDK_30s1043821g002	3	15.069	1	20	650	669	UCGCUUGGUGCAGGUCGGGA	UCCCAACUUGCAACAAGUGA	Cleavage	[locus_tag="PDK_30s1043821L002"] [product="partial gene, no protein identified"] [strand="-"]	1
pda-miR477d_L+1	PDK_30s837021g002	1.5	24.109	1	21	46	66	ACUCUCCCUCAAGGGCUUCUC	GAGAAGCCUUUGAGGGAGAGC	Cleavage	[locus_tag="PDK_30s837021L002"] [product="partial gene, no protein identified"] [strand="+"]	1
pda-miR477d_L+1	PDK_30s777951g001	3	21.61	1	21	4	24	ACUCUCCCUCAAGGGCUUCUC	GAGAAGCCCUUUGGGGAGAUU	Translation	[locus_tag="PDK_30s777951L001"] [product="copia-type polyprotein"] [strand="+"]	1
pda-miR398c	PDK_30s657581g001	3	20.927	1	20	471	490	UGUGUUCUCAGGUCGCCCCU	AGGGGCGACUGGAGAACUCA	Translation	[locus_tag="PDK_30s657581L001"] [product="mads box"] [strand="-"]	1
pda-miR398c	PDK_30s760501g002	3	16.793	1	20	102	121	UGUGUUCUCAGGUCGCCCCU	AGGGGAGACUUGAGAAUAUG	Cleavage	[locus_tag="PDK_30s760501L002"] [product="similar to predicted protein"] [strand="-"]	1
pda-miR398c	PDK_30s969551g002	3	22.458	1	20	544	563	UGUGUUCUCAGGUCGCCCCU	AGGGGGGACUGGAGGACACA	Translation	[locus_tag="PDK_30s969551L002"] [product="transparent testa 1"] [strand="+"]	1
pda-miR390a	PDK_30s697331g001	2.5	18.634	1	21	403	423	AAGCUCAGGAGGGAUAGCGCC	GGUCCUAUUCCUUCUGAGCUU	Cleavage	[locus_tag="PDK_30s697331L001"] [product="leucine-rich repeat receptor-like proteinkinase"] [strand="+"]	1
pda-miR828a	PDK_30s989631g002	2.5	17.741	1	22	293	314	UCUUGCUCAAAUGAGUAUUCCA	UGUAAUAUCCAUUUGAGCAAGA	Cleavage	[locus_tag="PDK_30s989631L002"] [product="flavonoid o-methyltransferase related"] [strand="-"]	1
pda-miR828a	PDK_30s854461g001	3	19.692	1	20	405	424	UCUUGCUCAAAUGAGUAUUC	GAAUACUCAUUUCAUCAAGG	Cleavage	[locus_tag="PDK_30s854461L001"] [product="similar to predicted protein"] [strand="-"]	1
pda-miR828a	PDK_30s1077261g001	2.5	13.436	1	20	21	40	UCUUGCUCAAAUGAGUAUUC	GAAUGCUGAUUGGAGCAAGA	Translation	[locus_tag="PDK_30s1077261L001"] [product="glycerophosphoryl diester"] [strand="-"]	1
pda-miR828a	PDK_30s927361g003	3	16.961	1	20	616	635	UCUUGCUCAAAUGAGUAUUC	GGAUAUUAAUUUGAGUAAGG	Cleavage	[locus_tag="PDK_30s927361L003"] [product="abc transporter"] [strand="-"]	1
pda-miR828a	PDK_30s776601g001	3	16.1	1	20	234	253	UCUUGCUCAAAUGAGUAUUC	GAACACCUAUUUGGGCAAGA	Cleavage	[locus_tag="PDK_30s776601L001"] [product="retrotransposon ty1-copia subclass"] [strand="+"]	1
pda-miR169c_R-1_2ss14CT15TC	PDK_30s6550962g001	2.5	19.996	1	20	1632	1651	UAGCCAAGGAUGAUCUGCCU	AGGGAGGUCAUCUUUGGCUG	Cleavage	[locus_tag="PDK_30s6550962L001"] [product="partial gene, no protein identified"] [strand="+"]	1
pda-miR172c-p3_1ss11TC	PDK_30s758731g001	1.5	14.903	1	24	286	309	AAUGGGAAUCCUGAUGAUGCUGCA	UGCAGCAUCAUCAAGAUUCUCAUU	Translation	[locus_tag="PDK_30s758731L001"] [product="partial gene, no protein identified"] [strand="-"]	1
pda-miR172c-p3_1ss11TC	PDK_30s749921g002	3	21.301	1	24	1326	1349	AAUGGGAAUCCUGAUGAUGCUGCA	UGCAGCAUCAUCAGGAUUCCCGCC	Cleavage	[locus_tag="PDK_30s749921L002"] [product="ap2 domain-containing transcription factor"] [strand="+"]	1
pda-miR172c-p3_1ss11TC	PDK_30s858801g003	2	18.566	1	23	1329	1351	AAUGGGAAUCCUGAUGAUGCUGC	GCAGUAUCACCAGGAUUUCCAUU	Cleavage	[locus_tag="PDK_30s858801L003"] [product="similar to predicted protein"] [strand="+"]	1
pda-miR172c-p3_1ss11TC	PDK_30s1074861g014	3	13.305	1	23	461	483	AAUGGGAAUCCUGAUGAUGCUGC	GAAGCAUCAUCAGGGUGUUCAUU	Cleavage	[locus_tag="PDK_30s1074861L014"] [product="similar to predicted protein"] [strand="-"]	1
pda-miR172c-p3_1ss11TC	PDK_30s765961g002	3	20.01	1	23	722	744	AAUGGGAAUCCUGAUGAUGCUGC	GUGGCAUCAGCAGGCUUCCCAUC	Translation	[locus_tag="PDK_30s765961L002"] [product="cytochrome c oxidase subunit"] [strand="-"]	1
pda-miR172c-p3_1ss11TC	PDK_30s903531g003	2.5	14.368	1	22	600	621	AAUGGGAAUCCUGAUGAUGCUG	CGACACCAUCAGGAUUCUCAUU	Cleavage	[locus_tag="PDK_30s903531L003"] [product="partial gene, no protein identified"] [strand="-"]	1
pda-miR172c-p3_1ss11TC	PDK_30s671741g008	3	17.059	1	20	92	111	AAUGGGAAUCCUGAUGAUGC	CGAUCAUCAGGAUUCCCAUC	Cleavage	[locus_tag="PDK_30s671741L008"] [product="atp binding protein"] [strand="-"]	1
pda-miR172c-p3_1ss11TC	PDK_30s1116681g008	2.5	20.895	1	21	1375	1395	AAUGGGAAUCCUGAUGAUGCU	AGCCUCAUCGGGCUUCCCAUU	Translation	[locus_tag="PDK_30s1116681L008"] [product="pentatricopeptide repeat-containing protein"] [strand="-"]	1
pda-miR397_2ss5TC20CT	PDK_30s967451g001	3	16.926	1	21	135	155	UCAUCGAGUGCAGCGUUGAUG	CAUCAAUGGUGCACUCGAUCA	Cleavage	[locus_tag="PDK_30s967451L001"] [product="partial gene, no protein identified"] [strand="+"]	1
pda-miR397_2ss5TC20CT	PDK_30s1170901g001	3	19.094	1	21	108	128	UCAUCGAGUGCAGCGUUGAUG	CGUCAACGCUGCUCUCAAUGA	Translation	[locus_tag="PDK_30s1170901L001"] [product="diphenol oxidase"] [strand="+"]	1
pda-miR397_2ss5TC20CT	PDK_30s6550951g005	3	12.637	1	21	396	416	UCAUCGAGUGCAGCGUUGAUG	CGUCAACGCUGCUCUCAAUGA	Translation	[locus_tag="PDK_30s6550951L005"] [product="diphenol oxidase"] [strand="+"]	1
pda-miR397_2ss5TC20CT	PDK_30s775611g003	3	16.024	1	20	1892	1911	UCAUCGAGUGCAGCGUUGAU	UUCAAUGUUGUACUUGAUGA	Cleavage	[locus_tag="PDK_30s775611L003"] [product="similar to predicted protein"] [strand="-"]	1
pda-miR397_2ss5TC20CT	PDK_30s906701g001	2.5	23.27	1	20	145	164	UCAUCGAGUGCAGCGUUGAU	AUCGGCGAUGUACUCGAUGA	Cleavage	[locus_tag="PDK_30s906701L001"] [product="partial gene, no protein identified"] [strand="+"]	1
pda-miR397_2ss5TC20CT	PDK_30s661361g002	3	12.399	1	20	688	707	UCAUCGAGUGCAGCGUUGAU	AUCAACGCUGCACUCAACGA	Cleavage	[locus_tag="PDK_30s661361L002"] [product="similar to predicted protein"] [strand="+"]	1
pda-miR397_2ss5TC20CT	PDK_30s693681g002	3	17.503	1	21	675	695	UCAUCGAGUGCAGCGUUGAUG	UGUCAACGCUGCUCUCAAUGA	Translation	[locus_tag="PDK_30s693681L002"] [product="laccase (diphenol oxidase)-like protein"] [strand="+"]	1
pda-3p-231836_28	PDK_30s1146061g001	2.5	17.354	1	22	789	810	CAGAAGGCUUCUGUUCGGCACC	GCUGCUGAACAUAAGCCUUCUU	Translation	[locus_tag="PDK_30s1146061L001"] [product="tga1 dna binding calmodulin bindingtranscription factor"] [strand="-"]	1
pda-3p-231836_28	PDK_30s1160831g002	3	18.075	1	21	991	1011	CAGAAGGCUUCUGUUCGGCAC	GUGCUGAUCAGAAGGCUUCUG	Cleavage	[locus_tag="PDK_30s1160831L002"] [product="partial gene, no protein identified"] [strand="-"]	1
pda-3p-231836_28	PDK_30s793121g002	3	12.144	1	22	651	672	CAGAAGGCUUCUGUUCGGCACC	GCUGUUGAACAUAAGCCUUCUU	Translation	[locus_tag="PDK_30s793121L002"] [product="transcription factor hbp-1b"] [strand="-"]	1
pda-5p-37236_491	PDK_30s1119371g001	3	20.65	1	22	686	707	ACUUCGAGUAGGAUUCCUAGAG	CGUUAGGAGACCUCCUCGAAGU	Translation	[locus_tag="PDK_30s1119371L001"] [product="cellulose synthase-like protein"] [strand="-"]	1
pda-3p-417972_12	PDK_30s898621g008	3	15.211	1	25	2577	2601	UUUGGGCACCUGGACAUUUGGCACC	GGUGCCUAGUGUCCAAGUGUCCAAA	Translation	[locus_tag="PDK_30s898621L008"] [product="similar to predicted protein"] [strand="-"]	1
pda-3p-417972_12	PDK_30s696771g004	1.5	14.653	1	26	21	46	UUUGGGCACCUGGACAUUUGGCACCA	UGGCAUCAAAUGUUCAAGUGCCCAAA	Translation	[locus_tag="PDK_30s696771L004"] [product="partial gene, no protein identified"] [strand="+"]	1
pda-3p-316346_17	PDK_30s679311g011	2	13.95	1	22	393	414	AAUACCACUUUCCCAUCUCUCU	AGGGAGAUUGGAGAGUGGUAUU	Cleavage	[locus_tag="PDK_30s679311L011"] [product="similar to predicted protein"] [strand="+"]	1
pda-5p-310639_18	PDK_30s799341g002	2.5	15.198	1	20	723	742	UCAUUGGGCCUAGUAGACUA	UGGUUUAUUAGGCUCGAUGA	Cleavage	[locus_tag="PDK_30s799341L002"] [product="nucleic acid binding"] [strand="+"]	1
pda-5p-310639_18	PDK_30s1117341g001	3	20.832	1	20	572	591	UCAUUGGGCCUAGUAGACUA	UAGUCUUUUAGGUUCGAUGA	Cleavage	[locus_tag="PDK_30s1117341L001"] [product="leucine rich repeat family expressed"] [strand="-"]	1
pda-5p-152404_54	PDK_30s65509116g001	3	17.045	1	20	187	206	ACCGGCGGUAAGAUUUUGUA	UAUGAAAACUUACUGCUGGU	Cleavage	[locus_tag="PDK_30s65509116L001"] [product="similar to predicted protein"] [strand="+"]	1
pda-5p-152404_54	PDK_30s739721g004	3	22.202	1	20	1073	1092	ACCGGCGGUAAGAUUUUGUA	UACGAGGUAUUGCCGCCGGU	Cleavage	[locus_tag="PDK_30s739721L004"] [product="similar to predicted protein"] [strand="+"]	1
pda-5p-271611_22	PDK_30s819001g003	3	16.718	1	21	164	184	AGCUAGAUCGGUCCUUCAUCG	CCAUGAUGGACUGGUCUAGCU	Cleavage	[locus_tag="PDK_30s819001L003"] [product="partial gene, no protein identified"] [strand="+"]	1
pda-5p-172763_44	PDK_30s1122781g001	3	14.669	1	20	106	125	AUUCUAAGCAUGUUCGGGUU	AACCUGAAUAAGUUUGGAAU	Translation	[locus_tag="PDK_30s1122781L001"] [product="acetolactate synthase small subunit"] [strand="+"]	1
pda-5p-172763_44	PDK_30s805061g001	3	17.782	1	20	238	257	AUUCUAAGCAUGUUCGGGUU	AACCCCAACAAGUUUGGAAU	Translation	[locus_tag="PDK_30s805061L001"] [product="partial gene, no protein identified"] [strand="+"]	1
pda-5p-113778_87	PDK_30s658831g002	2.5	22.209	1	21	375	395	UCUGCUGUUCACCCUGUGUUG	CGGCACAGGGUGGACGGCGGA	Cleavage	[locus_tag="PDK_30s658831L002"] [product="atp gtp-binding protein"] [strand="+"]	1
pda-5p-113778_87	PDK_30s1102701g001	3	16.39	1	20	2307	2326	UCUGCUGUUCACCCUGUGUU	AACCCAGGGUGUACAGUAGG	Translation	[locus_tag="PDK_30s1102701L001"] [product="partial gene, no protein identified"] [strand="-"]	1
pda-5p-113778_87	PDK_30s1094441g001	3	18.284	1	20	734	753	UCUGCUGUUCACCCUGUGUU	AAUACAGGCUGCACAGUAGA	Translation	[locus_tag="PDK_30s1094441L001"] [product="partial gene, no protein identified"] [strand="+"]	1
pda-5p-113778_87	PDK_30s710451g004	3	20.83	1	20	504	523	UCUGCUGUUCACCCUGUGUU	GACAGAGUGUGAACAGCAGG	Cleavage	[locus_tag="PDK_30s710451L004"] [product="b-cell receptor-associated protein 31-likecontaining protein"] [strand="+"]	1
pda-5p-93628_119	PDK_30s6550962g001	2.5	19.996	1	21	1631	1651	UAGCCAAGGAUGAUCUGCCUA	UAGGGAGGUCAUCUUUGGCUG	Cleavage	[locus_tag="PDK_30s6550962L001"] [product="partial gene, no protein identified"] [strand="+"]	1
pda-3p-261846_23	PDK_30s777581g001	3	20.623	1	20	593	612	AGUCGACUCUGAACUUUCAG	CUGACAGUUUAGAGUUGACA	Cleavage	[locus_tag="PDK_30s777581L001"] [product="wrky dna-binding protein"] [strand="+"]	1
pda-5p-266573_22	PDK_30s687161g003	3	15.354	1	21	2246	2266	UCCAAAGCGUCGGAAAAGGUU	AACCUUUUCUGAGGCCUUGGA	Translation	[locus_tag="PDK_30s687161L003"] [product="partial gene, no protein identified"] [strand="+"]	1
pda-5p-266573_22	PDK_30s879361g007	3	20.538	1	21	926	946	UCCAAAGCGUCGGAAAAGGUU	AACUCUUUCCGAGGUUUUGGA	Translation	[locus_tag="PDK_30s879361L007"] [product="partial gene, no protein identified"] [strand="-"]	1
pda-5p-266573_22	PDK_30s1186921g002	2.5	23.709	1	20	90	110	UCCAAAG-CGUCGGAAAAGGU	GCCUUUUCCGACGGUUUUGGA	Cleavage	[locus_tag="PDK_30s1186921L002"] [product="beta-hydroxyacyl-acp dehydratase"] [strand="+"]	1
pda-3p-262764_23	PDK_30s733111g001	3	19.715	1	21	3216	3236	CCGGAUCUCUGUUUCAAACGA	UCGUUUGAAGCAGAUGUUCGG	Cleavage	[locus_tag="PDK_30s733111L001"] [product="partial gene, no protein identified"] [strand="+"]	1
pda-3p-262764_23	PDK_30s760421g001	2.5	16.974	1	20	1200	1219	CCGGAUCUCUGUUUCAAACG	CCUUUGGAACAAAGAUCCGG	Translation	[locus_tag="PDK_30s760421L001"] [product="rna-dependent rna polymerase"] [strand="-"]	1
pda-3p-262764_23	PDK_30s675901g003	3	16.888	1	20	43	63	CCGGAUCU-CUGUUUCAAACG	UGUUUGAAACAGGAGAUCCGU	Translation	[locus_tag="PDK_30s675901L003"] [product="dna binding"] [strand="+"]	1
pda-5p-16728_1419	PDK_30s901101g001	3	23.431	1	21	17	37	GUUCCCUCCAUUCACUUCAGC	GCUGGGGUGGAUGGAGGGACC	Cleavage	[locus_tag="PDK_30s901101L001"] [product="filamentation temperature-sensitive h 2b"] [strand="-"]	1
pda-5p-16728_1419	PDK_30s866091g002	3	15.044	1	20	1310	1330	GUUCCCUCCAUUC-ACUUCAG	UUGAAGUUGAAUGGAGGGAAA	Cleavage	[locus_tag="PDK_30s866091L002"] [product="far1 zinc swim-type"] [strand="+"]	1
pda-5p-16728_1419	PDK_30s915641g005	3	16.516	1	20	477	496	GUUCCCUCCAUUCACUUCAG	CUUAAGUGGUUGGAGGGGAC	Translation	[locus_tag="PDK_30s915641L005"] [product="photosystem ii 11 kda"] [strand="+"]	1
pda-5p-260633_23	PDK_30s736671g001	3	21.429	1	23	634	656	UUUUGGACCCAGACCCGACCCGG	UUGGUUCUGGCCUGGGUCCAAAA	Cleavage	[locus_tag="PDK_30s736671L001"] [product="r2r3 myb transcription factor myb-if35"] [strand="-"]	1
pda-3p-88602_130	PDK_30s1167841g003	3	15.209	1	23	964	986	AGGAAGAAGAACUUGAACUCAAG	UUUCAAUUUAAGUUCUUCUUCUU	Cleavage	[locus_tag="PDK_30s1167841L003"] [product="fh protein nfh2"] [strand="-"]	1
pda-3p-88602_130	PDK_30s783031g003	3	11.541	1	22	359	380	AGGAAGAAGAACUUGAACUCAA	UUUAGUUCGAUUUCUUCUUCUU	Cleavage	[locus_tag="PDK_30s783031L003"] [product="partial gene, no protein identified"] [strand="-"]	1
pda-3p-88602_130	PDK_30s984861g008	3	20.471	1	23	926	948	AGGAAGAAGAACUUGAACUCAAG	CCUGAGUUCAGCUUCUUCUUGCU	Cleavage	[locus_tag="PDK_30s984861L008"] [product="dna binding"] [strand="-"]	1
pda-3p-88602_130	PDK_30s801211g003	2.5	15.766	1	24	807	830	AGGAAGAAGAACUUGAACUCAAGU	AGUAGAAUUCAAGCUCUUCUUCUU	Translation	[locus_tag="PDK_30s801211L003"] [product="dna-damage inducible protein"] [strand="-"]	1
pda-miR156i-3p_L-1R+1_1ss22TG	PDK_30s740851g001	3	20.003	1	20	562	581	GCUCACUUCUCUUUCUGUCA	GGGCAGAAGGGGAAGUGGGC	Cleavage	[locus_tag="PDK_30s740851L001"] [product="partial gene, no protein identified"] [strand="+"]	1
pda-miR156i-3p_L-1R+1_1ss22TG	PDK_30s1066501g001	3	22.158	1	20	1048	1067	GCUCACUUCUCUUUCUGUCA	CGGCGGGAGGAGAAGUGAGC	Cleavage	[locus_tag="PDK_30s1066501L001"] [product="retrotransposon ty3-gypsy subclass"] [strand="-"]	1
pda-miR156i-3p_L-1R+1_1ss22TG	PDK_30s1131841g001	3	15.982	1	20	50	69	GCUCACUUCUCUUUCUGUCA	CGGCGGGAGGAGAAGUGAGC	Cleavage	[locus_tag="PDK_30s1131841L001"] [product="partial gene, no protein identified"] [strand="-"]	1
pda-miR156i-3p_L-1R+1_1ss22TG	PDK_30s1085741g001	3	18.773	1	21	634	654	GCUCACUUCUCUUUCUGUCAG	UUGGCAGGUGGAGAGGUGAGC	Cleavage	[locus_tag="PDK_30s1085741L001"] [product="bhlh transcription factor"] [strand="+"]	1
pda-miR156i-3p_L-1R+1_1ss22TG	PDK_30s732221g009	3	22.722	1	20	2909	2928	GCUCACUUCUCUUUCUGUCA	UGAAAGAAAGGGGAGUGAGG	Cleavage	[locus_tag="PDK_30s732221L009"] [product="partial gene, no protein identified"] [strand="+"]	1
pda-miR156i-3p_L-1R+1_1ss22TG	PDK_30s978251g001	3	9.745	1	20	182	201	GCUCACUUCUCUUUCUGUCA	GGAAGGAAAGGGAAGUGAGC	Cleavage	[locus_tag="PDK_30s978251L001"] [product="similar to predicted protein"] [strand="+"]	1
pda-miR395b-p3	PDK_30s1212481g007	2.5	19.872	1	21	1184	1204	AAGUGUUUGGGGGAACUCUAG	CUGGAGUGCCCCCAAACACUG	Cleavage	[locus_tag="PDK_30s1212481L007"] [product="pentatricopeptide repeat-containing"] [strand="+"]	1
pda-miR395b-p3	PDK_30s986061g002	3	19.942	1	20	125	144	AAGUGUUUGGGGGAACUCUA	CCGAGUUCCUCCAAGCACUU	Cleavage	[locus_tag="PDK_30s986061L002"] [product="atp sulfurylase"] [strand="+"]	1
pda-miR395b-p3	PDK_30s927641g001	3	14.176	1	20	316	335	AAGUGUUUGGGGGAACUCUA	AAGAGUUUCUUCAAACAUUU	Cleavage	[locus_tag="PDK_30s927641L001"] [product="histone acetyltransferase hat b"] [strand="+"]	1
pda-miR395b-p3	PDK_30s974041g002	3	20.217	1	21	4948	4968	AAGUGUUUGGGGGAACUCUAG	UUAGAGUUCCCUAAAGUAUUU	Translation	[locus_tag="PDK_30s974041L002"] [product="partial gene, no protein identified"] [strand="+"]	1
pda-miR395b-p3	PDK_30s1146891g001	3	12.986	1	21	733	753	AAGUGUUUGGGGGAACUCUAG	UUUGAGUGCCCUCAAACAUUU	Cleavage	[locus_tag="PDK_30s1146891L001"] [product="resistance complex protein i2c-1"] [strand="+"]	1
pda-miR164_2ss20CT21GT	PDK_30s1139491g001	2.5	15.902	1	21	540	560	UGGAGAAGCAGGGCACGUGUU	AACAUGAGCUCUGCUUCUUCA	Cleavage	[locus_tag="PDK_30s1139491L001"] [product="vesicle-associated membrane"] [strand="-"]	1
pda-miR164_2ss20CT21GT	PDK_30s807071g001	2.5	15.091	1	21	540	560	UGGAGAAGCAGGGCACGUGUU	AACAUGAGCUCUGCUUCUUCA	Cleavage	[locus_tag="PDK_30s807071L001"] [product="vesicle-associated membrane"] [strand="-"]	1
pda-miR164_2ss20CT21GT	PDK_30s718001g004	2.5	10.047	1	20	1023	1042	UGGAGAAGCAGGGCACGUGU	ACAUGUGCUUUGCUUUUUCA	Cleavage	[locus_tag="PDK_30s718001L004"] [product="at4g39170 t22f8_70"] [strand="-"]	1
pda-miR164_2ss20CT21GT	PDK_30s1198591g001	2.5	16.67	1	21	632	652	UGGAGAAGCAGGGCACGUGUU	AGCAAGUUCCCUGCUUCUCCA	Cleavage	[locus_tag="PDK_30s1198591L001"] [product="nac domain ipr003441"] [strand="+"]	1
pda-miR164_2ss20CT21GT	PDK_30s1141931g003	2.5	22.196	1	20	642	661	UGGAGAAGCAGGGCACGUGU	UCACGUGACCUGCUUCUCCG	Cleavage	[locus_tag="PDK_30s1141931L003"] [product="nac domain ipr003441"] [strand="+"]	1
pda-miR164_2ss20CT21GT	PDK_30s1197791g008	3	13.559	1	21	693	713	UGGAGAAGCAGGGCACGUGUU	AACACGAACUCUGCUUCUUCA	Cleavage	[locus_tag="PDK_30s1197791L008"] [product="vesicle-associated membrane"] [strand="-"]	1
pda-miR164_2ss20CT21GT	PDK_30s658491g001	3	16.161	1	20	1256	1275	UGGAGAAGCAGGGCACGUGU	CCACGAGCCUUGCUUCUCCG	Cleavage	[locus_tag="PDK_30s658491L001"] [product="partial gene, no protein identified"] [strand="-"]	1
pda-miR164_2ss20CT21GT	PDK_30s1181011g001	3	14.097	1	20	1316	1335	UGGAGAAGCAGGGCACGUGU	CCACGAGCCCUGCUUCUCUG	Cleavage	[locus_tag="PDK_30s1181011L001"] [product="partial gene, no protein identified"] [strand="-"]	1
pda-miR164_2ss20CT21GT	PDK_30s1103751g019	3	14.626	1	21	45	65	UGGAGAAGCAGGGCACGUGUU	GACAUGCUCCUUGCUUCUCCA	Cleavage	[locus_tag="PDK_30s1103751L019"] [product="aspartic proteinase"] [strand="+"]	1
pda-miR169_1ss20TG	PDK_30s6550962g001	3	19.996	1	21	1631	1651	CAGCCAAGGAUGACUUGCCGA	UAGGGAGGUCAUCUUUGGCUG	Cleavage	[locus_tag="PDK_30s6550962L001"] [product="partial gene, no protein identified"] [strand="+"]	1
pda-3p-274391_21	PDK_30s889891g005	2.5	18.634	1	22	3807	3828	CAAGUGUUCUAAGGAAAGAAGC	GAUUGUUUCCUUGGGACAUUUG	Cleavage	[locus_tag="PDK_30s889891L005"] [product="partial gene, no protein identified"] [strand="+"]	1
pda-3p-274391_21	PDK_30s738571g007	2.5	6.392	1	20	530	549	CAAGUGUUCUAAGGAAAGAA	UUCUUUUCUUCGCACACUUG	Translation	[locus_tag="PDK_30s738571L007"] [product="phosphate starvation response regulator-like"] [strand="-"]	1
pda-3p-274391_21	PDK_30s927361g003	3	11.953	1	21	240	260	CAAGUGUUCUAAGGAAAGAAG	UUUGUUUUCUUAGCAUACUUG	Cleavage	[locus_tag="PDK_30s927361L003"] [product="abc transporter"] [strand="-"]	1
pda-miR168a_R+3	PDK_30s1043821g002	3	15.069	1	21	649	669	UCGCUUGGUGCAGGUCGGGAA	UUCCCAACUUGCAACAAGUGA	Cleavage	[locus_tag="PDK_30s1043821L002"] [product="partial gene, no protein identified"] [strand="-"]	1
pda-miR395_R-1_2ss14AG20TG	PDK_30s986061g002	3	20.774	1	20	128	147	CUGAAGUGUUUGGGGGAACG	AGUUCCUCCAAGCACUUCAU	Cleavage	[locus_tag="PDK_30s986061L002"] [product="atp sulfurylase"] [strand="+"]	1
pda-miR395_R-1_2ss14AG20TG	PDK_30s1028201g011	3	19.246	1	20	1459	1478	CUGAAGUGUUUGGGGGAACG	GGUUCCACCAAACACUUCAA	Cleavage	[locus_tag="PDK_30s1028201L011"] [product="fkbp-rapamycin associated"] [strand="-"]	1
pda-miR395_R-1_2ss14AG20TG	PDK_30s65509220g001	3	14.963	1	20	1007	1026	CUGAAGUGUUUGGGGGAACG	CGUUCCCCGAAGCACUUCGU	Cleavage	[locus_tag="PDK_30s65509220L001"] [product="similar to predicted protein"] [strand="+"]	1
pda-miR395_R-1_2ss14AG20TG	PDK_30s973471g001	3	13.126	1	20	117	136	CUGAAGUGUUUGGGGGAACG	CGAUCCCCUAAACACUUCGU	Cleavage	[locus_tag="PDK_30s973471L001"] [product="receptor-kinase isolog"] [strand="+"]	1
pda-miR395_R-1_2ss14AG20TG	PDK_30s1207681g001	3	23.615	1	20	229	248	CUGAAGUGUUUGGGGGAACG	CCUUCUCCCAAGCACUUUGG	Cleavage	[locus_tag="PDK_30s1207681L001"] [product="serine threonine-protein kinase haspin"] [strand="+"]	1
pda-miR395_R-1_2ss14AG20TG	PDK_30s65509724g002	3	18.483	1	20	2301	2320	CUGAAGUGUUUGGGGGAACG	CGUGCCUCCAAAAAUUUCAG	Cleavage	[locus_tag="PDK_30s65509724L002"] [product="tzp dna binding nucleic acid binding zinc ionbinding"] [strand="+"]	1
pda-miR529e_1ss21CG	PDK_30s756061g001	1.5	16.372	1	21	669	689	AGAAGAGAGAGAGUACAGCCG	CAGCUGUGCUCUCUCUCUUCU	Cleavage	[locus_tag="PDK_30s756061L001"] [product="partial gene, no protein identified"] [strand="+"]	1
pda-miR529e_1ss21CG	PDK_30s704101g001	2.5	17.648	1	21	212	232	AGAAGAGAGAGAGUACAGCCG	CAGCUGUGCUCUCUCUCUUCG	Cleavage	[locus_tag="PDK_30s704101L001"] [product="partial gene, no protein identified"] [strand="-"]	1
pda-miR529e_1ss21CG	PDK_30s772931g003	2	13.697	1	21	441	461	AGAAGAGAGAGAGUACAGCCG	UGAUUGUGCUCUCUCUCUUCU	Cleavage	[locus_tag="PDK_30s772931L003"] [product="partial gene, no protein identified"] [strand="+"]	1
pda-miR529e_1ss21CG	PDK_30s774191g002	2.5	20.457	1	21	1241	1261	AGAAGAGAGAGAGUACAGCCG	UGGUUGAACUCUCUCUCUUCA	Cleavage	[locus_tag="PDK_30s774191L002"] [product="abscisic acid responsive elements-bindingfactor"] [strand="-"]	1
pda-miR529e_1ss21CG	PDK_30s789261g002	2.5	22.684	1	21	244	263	AGAAGAGAGAGAGUACAGCCG	CGGC-GUGCUCUCUCUCUUCU	Cleavage	[locus_tag="PDK_30s789261L002"] [product="partial gene, no protein identified"] [strand="+"]	1
pda-miR529e_1ss21CG	PDK_30s882821g001	2.5	16.64	1	21	1361	1380	AGAAGAGAGAGAGUACAGCCG	CGGC-GUGCUCUCUCUCUUCU	Cleavage	[locus_tag="PDK_30s882821L001"] [product="partial gene, no protein identified"] [strand="+"]	1
pda-miR529e_1ss21CG	PDK_30s1025931g001	3	21.478	1	20	588	607	AGAAGAGAGAGAGUACAGCC	GGCCGUGCUCUUCCUCUUCU	Cleavage	[locus_tag="PDK_30s1025931L001"] [product="partial gene, no protein identified"] [strand="+"]	1
pda-miR529e_1ss21CG	PDK_30s905141g003	3	17.681	1	20	1918	1937	AGAAGAGAGAGAGUACAGCC	GGCUGAACUCGCUUUCUUUU	Translation	[locus_tag="PDK_30s905141L003"] [product="partial gene, no protein identified"] [strand="-"]	1
pda-5p-131814_68	PDK_30s697991g001	3	15.597	1	20	1114	1133	AACAAAAGGCUUCUGUUCGG	UCGUAUAGAAGCAUUUUGUU	Cleavage	[locus_tag="PDK_30s697991L001"] [product="partial gene, no protein identified"] [strand="-"]	1
pda-3p-313824_18	PDK_30s770411g002	3	20.905	1	22	522	543	AGGAGUCGACUCCAGCUCUGCA	UUUGGAGUUGCAGUCGACUUCU	Cleavage	[locus_tag="PDK_30s770411L002"] [product="similar to predicted protein"] [strand="+"]	1
pda-3p-313824_18	PDK_30s1046851g001	3	21.286	1	21	141	161	AGGAGUCGACUCCAGCUCUGC	GGAGAGCUGGAGAGGACUCCU	Translation	[locus_tag="PDK_30s1046851L001"] [product="partial gene, no protein identified"] [strand="+"]	1
pda-3p-313824_18	PDK_30s1122301g005	3	21.191	1	21	193	213	AGGAGUCGACUCCAGCUCUGC	GCUAAGCUGGAGUAGACUCCU	Cleavage	[locus_tag="PDK_30s1122301L005"] [product="unnamed protein product"] [strand="-"]	1
pda-5p-224392_29	PDK_30s1119051g002	1	18.654	1	21	871	891	CAGUUCCUCCAAAGCUUUGUA	UACAGAGCUUUGGAGGAAUUG	Cleavage	[locus_tag="PDK_30s1119051L002"] [product="kinesin-related protein"] [strand="+"]	1
pda-5p-224392_29	PDK_30s740551g011	3	15.617	1	21	496	516	CAGUUCCUCCAAAGCUUUGUA	UACAGAACUUUGGAGGAAUUA	Cleavage	[locus_tag="PDK_30s740551L011"] [product="partial gene, no protein identified"] [strand="+"]	1
pda-5p-224392_29	PDK_30s904701g005	2.5	13.184	1	20	326	345	CAGUUCCUCCAAAGCUUUGU	AUAAAUUUUUGGAGGAGCUG	Cleavage	[locus_tag="PDK_30s904701L005"] [product="similar to predicted protein"] [strand="+"]	1
pda-5p-224392_29	PDK_30s1088671g002	3	11.123	1	20	245	264	CAGUUCCUCCAAAGCUUUGU	AUAAAUUUUUGGAGGAGUUG	Cleavage	[locus_tag="PDK_30s1088671L002"] [product="similar to predicted protein"] [strand="+"]	1
pda-5p-85614_137	PDK_30s760481g002	3	23.808	1	22	161	182	AGCUCCCUUGCCAGCUUUAGCC	GGAUGAAGCUGGGGAGGGAGCU	Translation	[locus_tag="PDK_30s760481L002"] [product="partial gene, no protein identified"] [strand="-"]	1
pda-3p-265953_23	PDK_30s1106101g003	3	20.321	1	25	1038	1062	AAGCUCUGGAUGGAACGCAAGAUAU	AGAUUUUGCGUUCUAUCAAGAGUUA	Cleavage	[locus_tag="PDK_30s1106101L003"] [product="iaa-amino acid hydrolase ilr1"] [strand="+"]	1
pda-3p-265953_23	PDK_30s1030181g009	3	16.756	1	23	403	425	AAGCUCUGGAUGGAACGCAAGAU	AUCUUGUUGUCCAUUCAGAGCUU	Cleavage	[locus_tag="PDK_30s1030181L009"] [product="similar to predicted protein"] [strand="+"]	1
pda-5p-136470_65	PDK_30s1075621g001	2.5	23.302	1	23	159	181	AAGAAAGCGUCGGCCAUGUAUGG	CUCUCCAUGGCCGAGGCUUUUUU	Translation	[locus_tag="PDK_30s1075621L001"] [product="glycerol 3-phosphate permease"] [strand="+"]	1
pda-5p-223801_29	PDK_30s922621g001	3	20.439	1	22	545	566	ACCGGCCGGUACUGUACCGAUA	UAUCGGUACCUUAUCGGUCGGU	Cleavage	[locus_tag="PDK_30s922621L001"] [product="50s ribosomal protein l7"] [strand="+"]	1
pda-3p-117840_82	PDK_30s1043961g001	2.5	19.672	1	20	367	386	AGGCACUUAUCGCCGGGCUA	AAGCCUGGCGAGAAGUGCCU	Translation	[locus_tag="PDK_30s1043961L001"] [product="partial gene, no protein identified"] [strand="-"]	1
pda-5p-228808_28	PDK_30s893251g001	2.5	16.978	1	22	474	495	AGGAUGUUUGACAUGGUCCUUG	CAAAGCCCAUGUCAAACAUUCU	Cleavage	[locus_tag="PDK_30s893251L001"] [product="similar to predicted protein"] [strand="-"]	1
pda-5p-228808_28	PDK_30s715601g001	3	11.2	1	23	760	782	AGGAUGUUUGACAUGGUCCUUGC	GUAAGGACCAAGACAAGCAUUCU	Translation	[locus_tag="PDK_30s715601L001"] [product="trna-splicing"] [strand="-"]	1
pda-miR4376_L+1R-2_1ss2AT	PDK_30s740551g019	2.5	22.931	1	20	595	614	UUCGCAGGAGAGAUGAUGCU	AGCAUCAUUGCUCUUGCGAG	Translation	[locus_tag="PDK_30s740551L019"] [product="endoplasmic reticulum"] [strand="-"]	1
pda-miR4376_L+1R-2_1ss2AT	PDK_30s838351g003	3	17.079	1	20	12	31	UUCGCAGGAGAGAUGAUGCU	AGCAUUAUCUAUUCUGCGGG	Translation	[locus_tag="PDK_30s838351L003"] [product="type-b response regulator"] [strand="+"]	1
pda-miR1432-5p_L-1_1ss20AG	PDK_30s1087351g002	3	20.182	1	19	522	541	UCAGGAGAGAUG-ACACCGG	CCGGUGUUCGUCUCUCUUGA	Cleavage	[locus_tag="PDK_30s1087351L002"] [product="pp315_arath ame: full=pentatricopeptiderepeat-containing protein at4g16470"] [strand="-"]	1
pda-5p-85614_137-R2	PDK_30s760481g002	3	23.808	1	22	161	182	AGCUCCCUUGCCAGCUUUAGCC	GGAUGAAGCUGGGGAGGGAGCU	Translation	[locus_tag="PDK_30s760481L002"] [product="partial gene, no protein identified"] [strand="-"]	1
pda-5p-427445_11	PDK_30s736671g001	3	20.738	1	22	634	655	UUUGGACCCAGACCCGACCCGG	UUGGUUCUGGCCUGGGUCCAAA	Cleavage	[locus_tag="PDK_30s736671L001"] [product="r2r3 myb transcription factor myb-if35"] [strand="-"]	1
pda-5p-183654_40	PDK_30s729641g001	3	21.299	1	22	797	818	ACCUGUUUAGACCUGUUUAGAC	GGUUAAACAGGUCUAAACAGCC	Cleavage	[locus_tag="PDK_30s729641L001"] [product="thylakoid-bound ascorbate peroxidase"] [strand="+"]	1
pda-5p-183654_40	PDK_30s904221g004	3	12.303	1	24	232	255	ACCUGUUUAGACCUGUUUAGACCC	GGAUCUAAACAAGUUGAAAUAGGU	Translation	[locus_tag="PDK_30s904221L004"] [product="clathrin binding"] [strand="+"]	1
pda-5p-183654_40	PDK_30s833141g002	2	15.929	1	23	8	29	ACCUGUUUAGACCUGUUUAGACC	GGGCUAAACAGGU-UAAACAGGU	Translation	[locus_tag="PDK_30s833141L002"] [product="40s ribosomal protein s11"] [strand="+"]	1
pda-5p-270991_22	PDK_30s719673g001	2.5	20.479	1	23	368	390	AUGUUUGAACACUUAAUCUAGCC	GGUUUGAUUAAAUGUUCAAAUAU	Cleavage	[locus_tag="PDK_30s719673L001"] [product="PREDICTED: hypothetical protein"] [strand="-"]	1
pda-3p-339262_16	PDK_30s914621g001	3	23.609	1	20	76	95	GUGGAGUCCUACUCUGGCCC	GGGGCAGAGUGGGACUCUAG	Cleavage	[locus_tag="PDK_30s914621L001"] [product="cytochrome c oxidase polypeptide vc"] [strand="+"]	1
pda-3p-339262_16	PDK_30s790671g003	3	23.979	1	20	153	172	GUGGAGUCCUACUCUGGCCC	UGGUCAGGGCAGGACUCCAC	Translation	[locus_tag="PDK_30s790671L003"] [product="similar to predicted protein"] [strand="-"]	1
pda-3p-132860_68	PDK_30s1136111g006	3	20.983	1	23	261	283	AGUACUCGGCUGAUGUACUCCGC	GCUGAGGUCAUUAGCCGAGUAUU	Cleavage	[locus_tag="PDK_30s1136111L006"] [product="partial gene, no protein identified"] [strand="-"]	1
pda-5p-184243_40	PDK_30s853151g001	2.5	16.358	1	20	173	192	AGUGAGGUUAUUGUAGUUUG	CAAGCUACAAUGAACUCACU	Cleavage	[locus_tag="PDK_30s853151L001"] [product="leucine-rich repeat-containing"] [strand="+"]	1
pda-5p-184243_40	PDK_30s1131851g003	3	19.577	1	23	761	783	AGUGAGGUUAUUGUAGUUUGACU	AGGCAGACUACAACAACCUCUCU	Translation	[locus_tag="PDK_30s1131851L003"] [product="similar to predicted protein"] [strand="+"]	1
pda-5p-184243_40	PDK_30s1198261g001	3	19.079	1	20	89	108	AGUGAGGUUAUUGUAGUUUG	CAAGCUGUAACAACCUCGCU	Translation	[locus_tag="PDK_30s1198261L001"] [product="cytochrome p450"] [strand="+"]	1
pda-miR171	PDK_30s1089541g003	3	15.241	1	20	276	295	UGAUUGAGCCGUGCCAAUAU	UUAUUGGCACGGUUCAGUCU	Cleavage	[locus_tag="PDK_30s1089541L003"] [product="similar to predicted protein"] [strand="+"]	1
pda-miR827_2ss15AG21TG	PDK_30s703271g003	2	19.773	1	21	400	420	UUAGAUGACCAUCAGCAAACG	UGUUUGCUGCUGGUUAUCUAG	Cleavage	[locus_tag="PDK_30s703271L003"] [product="partial gene, no protein identified"] [strand="-"]	1
pda-miR827_2ss15AG21TG	PDK_30s973161g001	2.5	16.601	1	20	1458	1477	UUAGAUGACCAUCAGCAAAC	GUCUGCUGAUGAUCAUCUGA	Translation	[locus_tag="PDK_30s973161L001"] [product="histone acetyltransferase"] [strand="+"]	1
pda-miR827_2ss15AG21TG	PDK_30s804361g004	3	11.225	1	20	526	545	UUAGAUGACCAUCAGCAAAC	GUUUGCUGAUGGCCAAUUAA	Cleavage	[locus_tag="PDK_30s804361L004"] [product="retinoblastoma protein"] [strand="-"]	1
pda-miR827_2ss15AG21TG	PDK_30s1191581g001	2.5	17.154	1	20	1626	1645	UUAGAUGACCAUCAGCAAAC	GUCUGCUGAUGAUCAUCUGA	Translation	[locus_tag="PDK_30s1191581L001"] [product="histone acetyltransferase"] [strand="+"]	1
pda-miR827_2ss15AG21TG	PDK_30s760631g001	3	16.906	1	21	1477	1497	UUAGAUGACCAUCAGCAAACG	UGUUAGCAGAUGGUCAUUUGA	Cleavage	[locus_tag="PDK_30s760631L001"] [product="receptor protein"] [strand="-"]	1
pda-miR530_2ss18TC20TA	PDK_30s65509724g002	1	17.133	1	21	70	90	UGCAUUUGCACCUGCACCUAC	GCAGGUGCAGGUGCAAAUGCA	Cleavage	[locus_tag="PDK_30s65509724L002"] [product="tzp dna binding nucleic acid binding zinc ionbinding"] [strand="+"]	1
pda-miR530_2ss18TC20TA	PDK_30s915891g001	3	15.257	1	21	10	30	UGCAUUUGCACCUGCACCUAC	GUAGGUGCAGAUGCGGGUGCG	Translation	[locus_tag="PDK_30s915891L001"] [product="similar to predicted protein"] [strand="+"]	1
pda-miR530_2ss18TC20TA	PDK_30s764411g002	3	21.386	1	21	13	33	UGCAUUUGCACCUGCACCUAC	GUAGGUGCAGAUGCGGGUGCG	Translation	[locus_tag="PDK_30s764411L002"] [product="similar to predicted protein"] [strand="+"]	1
pda-miR530_2ss18TC20TA	PDK_30s702691g032	3	16.409	1	20	545	564	UGCAUUUGCACCUGCACCUA	CAGGUCCAGGGGCAAAUGCA	Translation	[locus_tag="PDK_30s702691L032"] [product="tpr domain containing protein"] [strand="+"]	1
pda-3p-35797_519	PDK_30s948721g001	3	21.067	1	24	1857	1880	ACCCUUGUUUUGAAUGUCUGAAGG	CCGUCAGAUAUCCGGAGCAAGGGU	Cleavage	[locus_tag="PDK_30s948721L001"] [product="kh domain containing expressed"] [strand="+"]	1
pda-3p-35797_519	PDK_30s708731g003	3	12.541	1	23	615	636	ACCCUUGUUUUGAAUGUCUGAAG	CUUCAGA-GUUCAGAACAAGGGU	Cleavage	[locus_tag="PDK_30s708731L003"] [product="inositolphosphorylceramide-b c-26 hydroxylase"] [strand="+"]	1
pda-3p-35797_519	PDK_30s1155431g001	3	15.807	1	24	590	613	ACCCUUGUUUUGAAUGUCUGAAGG	UCUCCAGGGGUUCAAAACAAGGGA	Cleavage	[locus_tag="PDK_30s1155431L001"] [product="similar to predicted protein"] [strand="+"]	1
pda-3p-35797_519	PDK_30s665281g001	3	22.629	1	20	64	83	ACCCUUGUUUUGAAUGUCUG	AAGACAUUCGAGACAAGGGA	Cleavage	[locus_tag="PDK_30s665281L001"] [product="aldehyde dehydrogenase"] [strand="+"]	1
pda-3p-35797_519	PDK_30s957931g002	3	20.265	1	21	382	402	ACCCUUGUUUUGAAUGUCUGA	UCCGAUAUCCAAAACAGGGGU	Cleavage	[locus_tag="PDK_30s957931L002"] [product="flavine-containing monoxygenase"] [strand="-"]	1
pda-3p-93572_119	PDK_30s777881g001	3	16.322	1	20	472	491	CCUGUGCAUGCCUCCUCCAC	GUGGCGGAGGCAUGCGAAGG	Cleavage	[locus_tag="PDK_30s777881L001"] [product="mip nip subfamily"] [strand="-"]	1
pda-3p-93572_119	PDK_30s783041g014	3	21.495	1	21	1386	1405	CCUGUGCAUGCCUCCUCCACC	GGUGGAGGUGG-AUGCACAGG	Translation	[locus_tag="PDK_30s783041L014"] [product="similar to predicted protein"] [strand="+"]	1
pda-5p-181586_41	PDK_30s1147711g001	2.5	15.008	1	20	78	97	UUAUAACUACAGAUUUUCCA	UGGAAAAUCUGUGCUUAUGA	Cleavage	[locus_tag="PDK_30s1147711L001"] [product="glycyl-trna synthetase"] [strand="+"]	1
pda-5p-181586_41	PDK_30s841371g002	3	17.981	1	20	2154	2173	UUAUAACUACAGAUUUUCCA	UGGAAAGUUUGUUGUUGUGA	Cleavage	[locus_tag="PDK_30s841371L002"] [product="similar to predicted protein"] [strand="-"]	1
pda-5p-181586_41	PDK_30s732221g009	3	15.284	1	20	2185	2204	UUAUAACUACAGAUUUUCCA	CGGAAAAUGCGUAGUUAUAA	Translation	[locus_tag="PDK_30s732221L009"] [product="partial gene, no protein identified"] [strand="+"]	1
pda-5p-181586_41	PDK_30s890881g005	3	13.249	1	20	195	214	UUAUAACUACAGAUUUUCCA	UGAAAAGUCUGUUGUUGUAA	Cleavage	[locus_tag="PDK_30s890881L005"] [product="guanylate binding protein"] [strand="-"]	1
pda-5p-28659_707	PDK_30s1080871g002	2.5	16.103	1	20	1489	1508	GUUCCCUCAGACACUUCACU	AGUGAAGUUUCUGAGGGUAC	Cleavage	[locus_tag="PDK_30s1080871L002"] [product="similar to predicted protein"] [strand="+"]	1
pda-5p-414524_12	PDK_30s1048951g002	2	9.572	1	21	231	251	AUGAAGUGAUUAAUGGGAUUG	CAAUACCAUUCAUCACUUCAU	Translation	[locus_tag="PDK_30s1048951L002"] [product="c2-h2 zinc finger protein"] [strand="-"]	1
pda-5p-414524_12	PDK_30s6550956g007	3	15.437	1	23	272	294	AUGAAGUGAUUAAUGGGAUUGCA	UGGAAUCCUAUCAAUUGUUUCAU	Cleavage	[locus_tag="PDK_30s6550956L007"] [product="periplasmic beta-glucosidase"] [strand="-"]	1
pda-5p-414524_12	PDK_30s681301g005	3	15.865	1	22	821	842	AUGAAGUGAUUAAUGGGAUUGC	GUAAUCCCAAGAAUCACUUCAA	Cleavage	[locus_tag="PDK_30s681301L005"] [product="partial gene, no protein identified"] [strand="-"]	1
pda-5p-414524_12	PDK_30s875331g002	2.5	16.427	1	23	193	215	AUGAAGUGAUUAAUGGGAUUGCA	UAUAAUCUCUUGAAUCACUUCAU	Cleavage	[locus_tag="PDK_30s875331L002"] [product="d-type cyclin"] [strand="-"]	1
pda-5p-414524_12	PDK_30s1131901g001	3	9.576	1	21	156	176	AUGAAGUGAUUAAUGGGAUUG	CCAUCCAAUUGAUCAUUUCAU	Cleavage	[locus_tag="PDK_30s1131901L001"] [product="partial gene, no protein identified"] [strand="+"]	1
pda-5p-414524_12	PDK_30s876401g001	3	13.634	1	20	322	341	AUGAAGUGAUUAAUGGGAUU	AAUCCCAUCAAUCUUUUCAU	Cleavage	[locus_tag="PDK_30s876401L001"] [product="trypsin-like serine and cysteine proteases"] [strand="-"]	1
pda-3p-117918_82	PDK_30s1212491g001	3	20.46	1	20	342	361	CGGAUGCUGCGCCUCGUGUA	UACAGCAGCCGCAGCAUCCG	Cleavage	[locus_tag="PDK_30s1212491L001"] [product="leucine-rich repeat containing"] [strand="-"]	1
pda-miR393a_R+1	PDK_30s803071g001	1	19.518	1	20	1503	1522	UCCAAAGGGAUCGCAUUGAU	AACAAUGCGAUCCCUUUGGA	Cleavage	[locus_tag="PDK_30s803071L001"] [product="transport inhibitor response 1"] [strand="+"]	1
pda-miR393a_R+1	PDK_30s894761g001	2	23.277	1	20	1059	1078	UCCAAAGGGAUCGCAUUGAU	GACAAUGCGAUCCCUUUGGA	Cleavage	[locus_tag="PDK_30s894761L001"] [product="transport inhibitor response 1"] [strand="+"]	1
pda-miR393a_R+1	PDK_30s947241g003	2	22.62	1	20	1221	1240	UCCAAAGGGAUCGCAUUGAU	GACAAUGCGAUCCCUUUGGA	Cleavage	[locus_tag="PDK_30s947241L003"] [product="transport inhibitor response 1"] [strand="+"]	1
pda-miR393a_R+1	PDK_30s1163791g001	3	15.908	1	20	41	60	UCCAAAGGGAUCGCAUUGAU	AUUAAUGCGGUGUCUUUGGG	Translation	[locus_tag="PDK_30s1163791L001"] [product="partial gene, no protein identified"] [strand="-"]	1
pda-miR166a-5p_1ss15CT	PDK_30s865121g003	2.5	11.297	1	20	39	58	GGAAUGUUGUCUGGUUCGAG	CUCGACCCAGACAGCAUUCG	Cleavage	[locus_tag="PDK_30s865121L003"] [product="partial gene, no protein identified"] [strand="-"]	1
pda-miR166a-5p_1ss15CT	PDK_30s1172371g001	2.5	19.009	1	20	1837	1856	GGAAUGUUGUCUGGUUCGAG	CUUGAACCAGACUAUGUUCC	Cleavage	[locus_tag="PDK_30s1172371L001"] [product="calmodulin binding"] [strand="+"]	1
pda-miR166a-5p_1ss15CT	PDK_30s708971g002	3	19.072	1	21	1203	1223	GGAAUGUUGUCUGGUUCGAGG	UCUCAAGCCAGCCAACAUUCU	Translation	[locus_tag="PDK_30s708971L002"] [product="u-box domain containing expressed"] [strand="+"]	1
pda-miR166a-5p_1ss15CT	PDK_30s999931g006	3	11.171	1	20	1026	1045	GGAAUGUUGUCUGGUUCGAG	CACGAACCAGACCACAUUCA	Cleavage	[locus_tag="PDK_30s999931L006"] [product="nucleotide binding"] [strand="-"]	1
pda-miR166a-5p_1ss15CT	PDK_30s772301g005	3	21.69	1	20	186	205	GGAAUGUUGUCUGGUUCGAG	CUCCAACUGGCCAACAUUCC	Translation	[locus_tag="PDK_30s772301L005"] [product="grx_s14 Grx_S15.1- glutaredoxin subgroup ii"] [strand="+"]	1
pda-miR169l-3p_2ss2GC13TC	PDK_30s700731g002	3	16.842	1	21	224	244	CCGGCAAGUUGUCUUUGGCUA	UGGCCAAAGACCACUUGUCGC	Translation	[locus_tag="PDK_30s700731L002"] [product="small heat-shock"] [strand="+"]	1
pda-miR169l-3p_2ss2GC13TC	PDK_30s1202711g001	3	17.08	1	22	37	58	CCGGCAAGUUGUCUUUGGCUAC	GAAGCGGAAGAUGACUUGCUGG	Cleavage	[locus_tag="PDK_30s1202711L001"] [product="receptor-like protein kinase"] [strand="-"]	1
pda-miR393a_R+1_1ss21CT	PDK_30s803071g001	1	19.518	1	22	1501	1522	UCCAAAGGGAUCGCAUUGAUUU	GAAACAAUGCGAUCCCUUUGGA	Cleavage	[locus_tag="PDK_30s803071L001"] [product="transport inhibitor response 1"] [strand="+"]	1
pda-miR393a_R+1_1ss21CT	PDK_30s894761g001	1.5	23.277	1	22	1057	1078	UCCAAAGGGAUCGCAUUGAUUU	GAGACAAUGCGAUCCCUUUGGA	Cleavage	[locus_tag="PDK_30s894761L001"] [product="transport inhibitor response 1"] [strand="+"]	1
pda-miR393a_R+1_1ss21CT	PDK_30s947241g003	2	22.62	1	20	1221	1240	UCCAAAGGGAUCGCAUUGAU	GACAAUGCGAUCCCUUUGGA	Cleavage	[locus_tag="PDK_30s947241L003"] [product="transport inhibitor response 1"] [strand="+"]	1
pda-miR393a_R+1_1ss21CT	PDK_30s1163791g001	3	15.908	1	20	41	60	UCCAAAGGGAUCGCAUUGAU	AUUAAUGCGGUGUCUUUGGG	Translation	[locus_tag="PDK_30s1163791L001"] [product="partial gene, no protein identified"] [strand="-"]	1
pda-3p-241095_26	PDK_30s959931g001	2.5	22.05	1	23	690	712	CGAGUGUUCCUAUGUUUAUCUGU	AGGGGUAAACAUGGGAGUACUUG	Cleavage	[locus_tag="PDK_30s959931L001"] [product="partial gene, no protein identified"] [strand="-"]	1
pda-3p-241095_26	PDK_30s974151g011	3	12.356	1	23	1105	1127	CGAGUGUUCCUAUGUUUAUCUGU	AGAGAUGAACAUAGAAGCACUCC	Translation	[locus_tag="PDK_30s974151L011"] [product="partial gene, no protein identified"] [strand="+"]	1
pda-3p-241095_26	PDK_30s912881g001	3	12.758	1	20	1320	1339	CGAGUGUUCCUAUGUUUAUC	AAUAAACAUGGGAACACUUU	Cleavage	[locus_tag="PDK_30s912881L001"] [product="similar to predicted protein"] [strand="-"]	1
pda-3p-117840_82-R3	PDK_30s1043961g001	2.5	19.672	1	20	367	386	AGGCACUUAUCGCCGGGCUA	AAGCCUGGCGAGAAGUGCCU	Translation	[locus_tag="PDK_30s1043961L001"] [product="partial gene, no protein identified"] [strand="-"]	1
pda-miR168a-3p_R-1_1ss3TC	PDK_30s967931g001	3	19.903	1	20	2524	2543	CCCGCCUUGCAUCAACUGAA	UGCAGUUGAUGCAAGUUGGG	Cleavage	[locus_tag="PDK_30s967931L001"] [product="esp4 (enhanced silencing phenotype 4) binding"] [strand="-"]	1
pda-3p-94240_118	PDK_30s909601g004	3	23.407	1	23	648	670	AUGCAGAAUCUCCUGAGUACUCG	UGAGUUUUCAGGAGAUGCUGCAU	Cleavage	[locus_tag="PDK_30s909601L004"] [product="partial gene, no protein identified"] [strand="+"]	1
pda-5p-266719_22	PDK_30s696051g002	3	24.944	1	24	375	398	ACGUUGGUUUUAACUUGGCUCACC	GAUGAGCCAAGUUCAGACCAACAU	Translation	[locus_tag="PDK_30s696051L002"] [product="partial gene, no protein identified"] [strand="-"]	1
pda-5p-266719_22	PDK_30s718541g001	3	11.037	1	22	156	177	ACGUUGGUUUUAACUUGGCUCA	UGAGCCAAGUUAGCACCAAAGU	Translation	[locus_tag="PDK_30s718541L001"] [product="partial gene, no protein identified"] [strand="-"]	1
pda-5p-266719_22	PDK_30s6550960g002	2.5	17.864	1	20	229	248	ACGUUGGUUUUAACUUGGCU	AGCCAAGUUAAAGUCACCGU	Cleavage	[locus_tag="PDK_30s6550960L002"] [product="glucan endo-1,4-beta-glucosidase"] [strand="+"]	1
pda-5p-350550_15	PDK_30s1082651g001	3	22.941	1	23	1181	1203	UCAUGACAAUGCAAUGUUCGGAA	UAUCGAGCUUUGCAUGGUCAUGG	Cleavage	[locus_tag="PDK_30s1082651L001"] [product="hexose transporter"] [strand="+"]	1
pda-5p-350550_15	PDK_30s1153001g002	3	19.287	1	20	522	541	UCAUGACAAUGCAAUGUUCG	UGGACAUGGCAUGGUCAUGA	Cleavage	[locus_tag="PDK_30s1153001L002"] [product="partial gene, no protein identified"] [strand="+"]	1
pda-miR396a-3p_L+1R-1	PDK_30s1195041g001	2	24.224	1	20	205	224	GUUCAAUAAAGCUGUGGGAA	UUUCCACAGCUUUCUUGAAC	Cleavage	[locus_tag="PDK_30s1195041L001"] [product="partial gene, no protein identified"] [strand="-"]	1
pda-miR396a-3p_L+1R-1	PDK_30s1043821g003	3	18.561	1	20	436	455	GUUCAAUAAAGCUGUGGGAA	AUCCCACAGCUUUAUUGUGC	Cleavage	[locus_tag="PDK_30s1043821L003"] [product="similar to predicted protein"] [strand="-"]	1
pda-miR396a-3p_L+1R-1	PDK_30s6550975g001	2.5	19.104	1	20	609	628	GUUCAAUAAAGCUGUGGGAA	UCCUUGCAGCUUUAUUGAAC	Cleavage	[locus_tag="PDK_30s6550975L001"] [product="replication protein a 70 kda dna-bindingsubunit"] [strand="-"]	1
pda-miR396a-3p_L+1R-1	PDK_30s676851g001	3	18.618	1	20	192	211	GUUCAAUAAAGCUGUGGGAA	UGCUCACAGCUUUAUUGCAC	Cleavage	[locus_tag="PDK_30s676851L001"] [product="aminopeptidase fxna"] [strand="+"]	1
pda-miR164a	PDK_30s1141931g003	2.5	22.196	1	20	642	661	UGGAGAAGCAGGGCACGUGC	UCACGUGACCUGCUUCUCCG	Cleavage	[locus_tag="PDK_30s1141931L003"] [product="nac domain ipr003441"] [strand="+"]	1
pda-miR164a	PDK_30s1198591g001	2	16.67	1	20	633	652	UGGAGAAGCAGGGCACGUGC	GCAAGUUCCCUGCUUCUCCA	Cleavage	[locus_tag="PDK_30s1198591L001"] [product="nac domain ipr003441"] [strand="+"]	1
pda-miR164a	PDK_30s658491g001	3	16.161	1	20	1256	1275	UGGAGAAGCAGGGCACGUGC	CCACGAGCCUUGCUUCUCCG	Cleavage	[locus_tag="PDK_30s658491L001"] [product="partial gene, no protein identified"] [strand="-"]	1
pda-miR164a	PDK_30s1181011g001	3	14.097	1	20	1316	1335	UGGAGAAGCAGGGCACGUGC	CCACGAGCCCUGCUUCUCUG	Cleavage	[locus_tag="PDK_30s1181011L001"] [product="partial gene, no protein identified"] [strand="-"]	1
pda-miR164a	PDK_30s747721g001	3	21.067	1	20	28	47	UGGAGAAGCAGGGCACGUGC	GCAUUUGCUCUGUUUCUUCA	Cleavage	[locus_tag="PDK_30s747721L001"] [product="beta-mannosidase 4"] [strand="+"]	1
pda-miR164a	PDK_30s830581g001	3	19.233	1	20	174	193	UGGAGAAGCAGGGCACGUGC	GCGCUUGUCCCGCUUCUCCA	Translation	[locus_tag="PDK_30s830581L001"] [product="partial gene, no protein identified"] [strand="-"]	1
pda-miR479_R-2_1ss12TC	PDK_30s821571g001	2.5	17.681	1	20	329	348	CGUGAUAUUGGCUCGGCUCA	UGAGUAGAGCCAGUAUCAUG	Cleavage	[locus_tag="PDK_30s821571L001"] [product="plastid alpha-amylase"] [strand="-"]	1
pda-miR479_R-2_1ss12TC	PDK_30s956031g003	3	19.809	1	20	792	811	CGUGAUAUUGGCUCGGCUCA	UGGGCGGAGCCAGUAUUAUG	Cleavage	[locus_tag="PDK_30s956031L003"] [product="partial gene, no protein identified"] [strand="+"]	1
pda-5p-61161_232	PDK_30s1087351g002	3	20.182	1	19	522	541	UCAGGAGAGAUG-ACACCGG	CCGGUGUUCGUCUCUCUUGA	Cleavage	[locus_tag="PDK_30s1087351L002"] [product="pp315_arath ame: full=pentatricopeptiderepeat-containing protein at4g16470"] [strand="-"]	1
pda-3p-64787_213	PDK_30s1009981g001	3	20.533	1	21	1528	1548	GUGCUCUUUCUCGUUGUCACC	GGUGACAGGGAGCAGGAGCAC	Translation	[locus_tag="PDK_30s1009981L001"] [product="partial gene, no protein identified"] [strand="+"]	1
pda-3p-64787_213	PDK_30s1180271g001	3	17.44	1	20	277	296	GUGCUCUUUCUCGUUGUCAC	GUGACAACGAUGAAGAACAC	Translation	[locus_tag="PDK_30s1180271L001"] [product="partial gene, no protein identified"] [strand="+"]	1
pda-miR529e_1ss21CT	PDK_30s756061g001	1.5	16.372	1	20	670	689	AGAAGAGAGAGAGUACAGCC	AGCUGUGCUCUCUCUCUUCU	Cleavage	[locus_tag="PDK_30s756061L001"] [product="partial gene, no protein identified"] [strand="+"]	1
pda-miR529e_1ss21CT	PDK_30s704101g001	2.5	17.648	1	20	213	232	AGAAGAGAGAGAGUACAGCC	AGCUGUGCUCUCUCUCUUCG	Cleavage	[locus_tag="PDK_30s704101L001"] [product="partial gene, no protein identified"] [strand="-"]	1
pda-miR529e_1ss21CT	PDK_30s772931g003	2	13.697	1	20	442	461	AGAAGAGAGAGAGUACAGCC	GAUUGUGCUCUCUCUCUUCU	Cleavage	[locus_tag="PDK_30s772931L003"] [product="partial gene, no protein identified"] [strand="+"]	1
pda-miR529e_1ss21CT	PDK_30s774191g002	2.5	20.457	1	20	1242	1261	AGAAGAGAGAGAGUACAGCC	GGUUGAACUCUCUCUCUUCA	Cleavage	[locus_tag="PDK_30s774191L002"] [product="abscisic acid responsive elements-bindingfactor"] [strand="-"]	1
pda-miR529e_1ss21CT	PDK_30s1025931g001	3	21.478	1	21	587	607	AGAAGAGAGAGAGUACAGCCU	AGGCCGUGCUCUUCCUCUUCU	Cleavage	[locus_tag="PDK_30s1025931L001"] [product="partial gene, no protein identified"] [strand="+"]	1
pda-miR529e_1ss21CT	PDK_30s905141g003	3	17.681	1	21	1917	1937	AGAAGAGAGAGAGUACAGCCU	AGGCUGAACUCGCUUUCUUUU	Translation	[locus_tag="PDK_30s905141L003"] [product="partial gene, no protein identified"] [strand="-"]	1
pda-miR529e_1ss21CT	PDK_30s821841g002	3	19.167	1	21	181	200	AGAAGAGAGAGAGUACAGCCU	AGGCUCUA-UCUCUCUCUUCU	Cleavage	[locus_tag="PDK_30s821841L002"] [product="partial gene, no protein identified"] [strand="-"]	1
pda-miR396a-3p_L+1_1ss21GA	PDK_30s1195041g001	2	24.224	1	20	205	224	GUUCAAUAAAGCUGUGGGAA	UUUCCACAGCUUUCUUGAAC	Cleavage	[locus_tag="PDK_30s1195041L001"] [product="partial gene, no protein identified"] [strand="-"]	1
pda-miR396a-3p_L+1_1ss21GA	PDK_30s6550975g001	2.5	19.104	1	21	608	628	GUUCAAUAAAGCUGUGGGAAA	UUCCUUGCAGCUUUAUUGAAC	Cleavage	[locus_tag="PDK_30s6550975L001"] [product="replication protein a 70 kda dna-bindingsubunit"] [strand="-"]	1
pda-miR396a-3p_L+1_1ss21GA	PDK_30s1043821g003	3	18.561	1	20	436	455	GUUCAAUAAAGCUGUGGGAA	AUCCCACAGCUUUAUUGUGC	Cleavage	[locus_tag="PDK_30s1043821L003"] [product="similar to predicted protein"] [strand="-"]	1
pda-miR396a-3p_L+1_1ss21GA	PDK_30s676851g001	3	18.618	1	20	192	211	GUUCAAUAAAGCUGUGGGAA	UGCUCACAGCUUUAUUGCAC	Cleavage	[locus_tag="PDK_30s676851L001"] [product="aminopeptidase fxna"] [strand="+"]	1
pda-miR394a-5p_1ss8TG	PDK_30s1008061g001	1	24.438	1	20	906	925	UUGGCAUGCUGUCCACCUCC	GGAGGUGGACAGAAUGCCAA	Cleavage	[locus_tag="PDK_30s1008061L001"] [product="partial gene, no protein identified"] [strand="+"]	1
pda-miR394a-5p_1ss8TG	PDK_30s758481g001	2.5	19.047	1	20	1769	1788	UUGGCAUGCUGUCCACCUCC	GGGAUUGGACAGCAUGCCAA	Cleavage	[locus_tag="PDK_30s758481L001"] [product="blast resistance protein"] [strand="+"]	1
pda-miR394a-5p_1ss8TG	PDK_30s885271g002	3	19.318	1	20	599	618	UUGGCAUGCUGUCCACCUCC	GGUGUUGGACAGGAUGCCAA	Cleavage	[locus_tag="PDK_30s885271L002"] [product="pentatricopeptide repeat-containing"] [strand="+"]	1
pda-miR528-5p	PDK_30s804191g003	2.5	12.781	1	21	792	812	UGGAAGGGGCAUGCAGAGGAG	CUCUUCUGCAUAUCUCUUCCA	Translation	[locus_tag="PDK_30s804191L003"] [product="microtubule associated protein family expressed"] [strand="-"]	1
pda-miR528-5p	PDK_30s1089671g002	3	4.047	1	21	426	446	UGGAAGGGGCAUGCAGAGGAG	UUCUUCUGUAUGCCUUUUCCU	Cleavage	[locus_tag="PDK_30s1089671L002"] [product="similar to predicted protein"] [strand="-"]	1
pda-miR528-5p	PDK_30s1172971g001	3	9.217	1	21	518	538	UGGAAGGGGCAUGCAGAGGAG	CUCUUCUUCAUGCUCCUUCCU	Cleavage	[locus_tag="PDK_30s1172971L001"] [product="retrotransposon unclassified"] [strand="-"]	1
pda-miR528-5p	PDK_30s655081g010	2.5	9.117	1	21	853	873	UGGAAGGGGCAUGCAGAGGAG	UUCUUCUGCCUGCCCCUUCUG	Cleavage	[locus_tag="PDK_30s655081L010"] [product="sucrose phosphate phosphatase"] [strand="-"]	1
pda-miR528-5p	PDK_30s715161g001	2.5	17.884	1	21	321	341	UGGAAGGGGCAUGCAGAGGAG	UUCCUCUGCAUCCCUCUUUCG	Translation	[locus_tag="PDK_30s715161L001"] [product="clathrin assembly"] [strand="+"]	1
pda-miR528-5p	PDK_30s1023721g002	3	12.265	1	21	792	812	UGGAAGGGGCAUGCAGAGGAG	CUCUUUUGCAUUCACCUUCCA	Translation	[locus_tag="PDK_30s1023721L002"] [product="bipolar kinesin krp-"] [strand="-"]	1
pda-miR528-5p	PDK_30s669462g003	2.5	3.555	1	21	57	77	UGGAAGGGGCAUGCAGAGGAG	UUCCUCUGCCCGCCCUUUCCA	Translation	[locus_tag="PDK_30s669462L003"] [product="superoxide dismutase"] [strand="+"]	1
pda-miR528-5p	PDK_30s671741g004	3	23.531	1	20	944	963	UGGAAGGGGCAUGCAGAGGA	UCCUUUGCAUUUUUCUUCCA	Translation	[locus_tag="PDK_30s671741L004"] [product="partial gene, no protein identified"] [strand="+"]	1
pda-miR156a_L+1R-1	PDK_30s789261g002	2	23.842	1	20	249	268	CUGACAGAAGAGAGUGAGCA	UGCUCUCUCUCUUCUGUCAA	Cleavage	[locus_tag="PDK_30s789261L002"] [product="partial gene, no protein identified"] [strand="+"]	1
pda-miR156a_L+1R-1	PDK_30s772931g003	2	15.287	1	20	447	466	CUGACAGAAGAGAGUGAGCA	UGCUCUCUCUCUUCUGUCAU	Cleavage	[locus_tag="PDK_30s772931L003"] [product="partial gene, no protein identified"] [strand="+"]	1
pda-miR156a_L+1R-1	PDK_30s756061g001	2	21.536	1	20	675	694	CUGACAGAAGAGAGUGAGCA	UGCUCUCUCUCUUCUGUCAA	Cleavage	[locus_tag="PDK_30s756061L001"] [product="partial gene, no protein identified"] [strand="+"]	1
pda-miR156a_L+1R-1	PDK_30s882821g001	2	20.571	1	20	1366	1385	CUGACAGAAGAGAGUGAGCA	UGCUCUCUCUCUUCUGUCAA	Cleavage	[locus_tag="PDK_30s882821L001"] [product="partial gene, no protein identified"] [strand="+"]	1
pda-miR156a_L+1R-1	PDK_30s940711g002	3	18.089	1	20	401	420	CUGACAGAAGAGAGUGAGCA	UGUUCACUGUCUUCUGUCUG	Cleavage	[locus_tag="PDK_30s940711L002"] [product="harpin-induced protein"] [strand="+"]	1
pda-3p-130659_69	PDK_30s776781g006	2.5	18.559	1	20	519	538	ACAAAGCUUUGGAGAACUGU	ACAGUUCACCAAGGCUUUGA	Cleavage	[locus_tag="PDK_30s776781L006"] [product="enolase"] [strand="-"]	1
pda-3p-130659_69	PDK_30s1030471g008	3	16.141	1	21	690	710	ACAAAGCUUUGGAGAACUGUU	GACAGUUCUUCCAAGUUUUGG	Translation	[locus_tag="PDK_30s1030471L008"] [product="similar to predicted protein"] [strand="+"]	1
pda-3p-130659_69	PDK_30s65509272g006	3	19.938	1	21	38	58	ACAAAGCUUUGGAGAACUGUU	AAGAGCUCUACAAAGCUUUGU	Cleavage	[locus_tag="PDK_30s65509272L006"] [product="gibberellin 20-"] [strand="+"]	1
pda-3p-130659_69	PDK_30s953791g005	3	17.245	1	20	847	866	ACAAAGCUUUGGAGAACUGU	AGAGUCCUCCAAAGCUUUGA	Cleavage	[locus_tag="PDK_30s953791L005"] [product="transferring glycosyl"] [strand="-"]	1
pda-5p-83202_144	PDK_30s1154451g001	1.5	17.622	1	24	44	67	ACCAGUCCGAGAAUCGUUUCAAUC	GGUUGAAACAAUUUUCGGACUGGU	Cleavage	[locus_tag="PDK_30s1154451L001"] [product="partial gene, no protein identified"] [strand="+"]	1
pda-5p-83202_144	PDK_30s745071g002	3	20.727	1	20	1448	1467	ACCAGUCCGAGAAUCGUUUC	UGGACGAUUUUCGGAUUGGU	Cleavage	[locus_tag="PDK_30s745071L002"] [product="6-phosphofructokinase 2"] [strand="-"]	1
pda-5p-83202_144	PDK_30s668711g007	2.5	20.558	1	24	134	157	ACCAGUCCGAGAAUCGUUUCAAUC	GUUCGAAACCGUUCUCUGACUGGU	Cleavage	[locus_tag="PDK_30s668711L007"] [product="atp-dependent rna and dna"] [strand="-"]	1
pda-5p-83202_144	PDK_30s886401g002	3	18.38	1	20	1406	1425	ACCAGUCCGAGAAUCGUUUC	GAAGUGGUUUACGGACUGGU	Translation	[locus_tag="PDK_30s886401L002"] [product="partial gene, no protein identified"] [strand="+"]	1
pda-miR156i-3p_L-1_1ss22TG	PDK_30s740851g001	3	20.003	1	20	562	581	GCUCACUUCUCUUUCUGUCA	GGGCAGAAGGGGAAGUGGGC	Cleavage	[locus_tag="PDK_30s740851L001"] [product="partial gene, no protein identified"] [strand="+"]	1
pda-miR156i-3p_L-1_1ss22TG	PDK_30s1066501g001	3	22.158	1	20	1048	1067	GCUCACUUCUCUUUCUGUCA	CGGCGGGAGGAGAAGUGAGC	Cleavage	[locus_tag="PDK_30s1066501L001"] [product="retrotransposon ty3-gypsy subclass"] [strand="-"]	1
pda-miR156i-3p_L-1_1ss22TG	PDK_30s1131841g001	3	15.982	1	20	50	69	GCUCACUUCUCUUUCUGUCA	CGGCGGGAGGAGAAGUGAGC	Cleavage	[locus_tag="PDK_30s1131841L001"] [product="partial gene, no protein identified"] [strand="-"]	1
pda-miR156i-3p_L-1_1ss22TG	PDK_30s1085741g001	3	18.773	1	21	634	654	GCUCACUUCUCUUUCUGUCAG	UUGGCAGGUGGAGAGGUGAGC	Cleavage	[locus_tag="PDK_30s1085741L001"] [product="bhlh transcription factor"] [strand="+"]	1
pda-miR156i-3p_L-1_1ss22TG	PDK_30s732221g009	3	22.722	1	20	2909	2928	GCUCACUUCUCUUUCUGUCA	UGAAAGAAAGGGGAGUGAGG	Cleavage	[locus_tag="PDK_30s732221L009"] [product="partial gene, no protein identified"] [strand="+"]	1
pda-miR156i-3p_L-1_1ss22TG	PDK_30s978251g001	3	9.745	1	20	182	201	GCUCACUUCUCUUUCUGUCA	GGAAGGAAAGGGAAGUGAGC	Cleavage	[locus_tag="PDK_30s978251L001"] [product="similar to predicted protein"] [strand="+"]	1
pda-3p-98930_109	PDK_30s803881g001	2.5	20.598	1	20	592	611	UCGGAAAGACUCGUUCCAAA	AAUGGAACGAGUCUUUCCGG	Cleavage	[locus_tag="PDK_30s803881L001"] [product="lethal leaf-spot 1"] [strand="-"]	1
pda-miR397_1ss20CT	PDK_30s1170901g001	1.5	19.094	1	21	108	128	UCAUUGAGUGCAGCGUUGAUG	CGUCAACGCUGCUCUCAAUGA	Translation	[locus_tag="PDK_30s1170901L001"] [product="diphenol oxidase"] [strand="+"]	1
pda-miR397_1ss20CT	PDK_30s6550951g005	1.5	12.637	1	21	396	416	UCAUUGAGUGCAGCGUUGAUG	CGUCAACGCUGCUCUCAAUGA	Translation	[locus_tag="PDK_30s6550951L005"] [product="diphenol oxidase"] [strand="+"]	1
pda-miR397_1ss20CT	PDK_30s661361g002	1.5	12.399	1	20	688	707	UCAUUGAGUGCAGCGUUGAU	AUCAACGCUGCACUCAACGA	Cleavage	[locus_tag="PDK_30s661361L002"] [product="similar to predicted protein"] [strand="+"]	1
pda-miR397_1ss20CT	PDK_30s693681g002	1.5	17.503	1	21	675	695	UCAUUGAGUGCAGCGUUGAUG	UGUCAACGCUGCUCUCAAUGA	Translation	[locus_tag="PDK_30s693681L002"] [product="laccase (diphenol oxidase)-like protein"] [strand="+"]	1
pda-miR397_1ss20CT	PDK_30s903491g006	3	11.447	1	21	710	730	UCAUUGAGUGCAGCGUUGAUG	CAUCACCGCUGCAUUCAAAGA	Cleavage	[locus_tag="PDK_30s903491L006"] [product="protein kinase domain containing expressed"] [strand="+"]	1
pda-miR397_1ss20CT	PDK_30s752661g001	2.5	20.707	1	20	247	266	UCAUUGAGUGCAGCGUUGAU	ACCGGUGCUGCACUCAAUGA	Cleavage	[locus_tag="PDK_30s752661L001"] [product="similar to predicted protein"] [strand="+"]	1
pda-miR397_1ss20CT	PDK_30s749161g002	3	18.816	1	21	765	785	UCAUUGAGUGCAGCGUUGAUG	UAACAAUGCUGCAUUCAAUGC	Cleavage	[locus_tag="PDK_30s749161L002"] [product="pentatricopeptide repeat-containing"] [strand="-"]	1
pda-miR397_1ss20CT	PDK_30s1079711g002	3	15.654	1	21	675	695	UCAUUGAGUGCAGCGUUGAUG	UGUCAACGCUGCCCUCAACGA	Translation	[locus_tag="PDK_30s1079711L002"] [product="laccase (diphenol oxidase)-like protein"] [strand="+"]	1
pda-miR397_1ss20CT	PDK_30s906701g001	3	23.27	1	20	145	164	UCAUUGAGUGCAGCGUUGAU	AUCGGCGAUGUACUCGAUGA	Cleavage	[locus_tag="PDK_30s906701L001"] [product="partial gene, no protein identified"] [strand="+"]	1
pda-miR397_1ss20CT	PDK_30s65509610g003	3	15.194	1	21	993	1013	UCAUUGAGUGCAGCGUUGAUG	UAUUUCUGCUGCACUCAAUGA	Cleavage	[locus_tag="PDK_30s65509610L003"] [product="PREDICTED: hypothetical protein"] [strand="+"]	1
pda-5p-85498_137	PDK_30s804191g003	2	12.781	1	20	793	812	UGGAAGGGACAUGCAGAGGA	UCUUCUGCAUAUCUCUUCCA	Translation	[locus_tag="PDK_30s804191L003"] [product="microtubule associated protein family expressed"] [strand="-"]	1
pda-5p-85498_137	PDK_30s706291g001	3	12.29	1	21	779	799	UGGAAGGGACAUGCAGAGGAA	UUUCUUUGUAAGUUCCUUCCA	Translation	[locus_tag="PDK_30s706291L001"] [product="partial gene, no protein identified"] [strand="-"]	1
pda-5p-85498_137	PDK_30s1154711g002	3	9.736	1	20	198	217	UGGAAGGGACAUGCAGAGGA	UCCUCUGCAUGUCACCUCCA	Cleavage	[locus_tag="PDK_30s1154711L002"] [product="hexokinase 1"] [strand="-"]	1
pda-5p-85498_137	PDK_30s671741g004	2.5	23.531	1	20	944	963	UGGAAGGGACAUGCAGAGGA	UCCUUUGCAUUUUUCUUCCA	Translation	[locus_tag="PDK_30s671741L004"] [product="partial gene, no protein identified"] [strand="+"]	1
pda-5p-85498_137	PDK_30s1150541g003	3	14.254	1	21	213	233	UGGAAGGGACAUGCAGAGGAA	UGUCUCUGUAUCUCCCUUCCA	Translation	[locus_tag="PDK_30s1150541L003"] [product="similar to predicted protein"] [strand="-"]	1
pda-5p-85498_137	PDK_30s1074181g006	3	5.33	1	21	377	397	UGGAAGGGACAUGCAGAGGAA	UUCCUCUCCAUUUCUCUUUCA	Translation	[locus_tag="PDK_30s1074181L006"] [product="pax transcription activation domain interacting"] [strand="-"]	1
pda-5p-85498_137	PDK_30s910541g004	3	10.502	1	21	82	102	UGGAAGGGACAUGCAGAGGAA	UUUCCCUGCUUGUUCCUUCCA	Cleavage	[locus_tag="PDK_30s910541L004"] [product="kinesin-like calmodulin-binding protein"] [strand="-"]	1
pda-5p-85498_137	PDK_30s877101g002	3	8.622	1	20	379	398	UGGAAGGGACAUGCAGAGGA	UCCUUUCCAUCUUCCUUCCA	Translation	[locus_tag="PDK_30s877101L002"] [product="similar to predicted protein"] [strand="-"]	1
pda-miR168c-3p	PDK_30s967931g001	3	19.903	1	20	2524	2543	CCCGCCUUGCAUCAACUGAA	UGCAGUUGAUGCAAGUUGGG	Cleavage	[locus_tag="PDK_30s967931L001"] [product="esp4 (enhanced silencing phenotype 4) binding"] [strand="-"]	1
pda-miR395_R-1_1ss14AG	PDK_30s986061g002	2	20.774	1	20	128	147	CUGAAGUGUUUGGGGGAACU	AGUUCCUCCAAGCACUUCAU	Cleavage	[locus_tag="PDK_30s986061L002"] [product="atp sulfurylase"] [strand="+"]	1
pda-miR395_R-1_1ss14AG	PDK_30s804591g003	3	12.168	1	20	2394	2413	CUGAAGUGUUUGGGGGAACU	AGUUCCCCCAGACCCUUCAU	Cleavage	[locus_tag="PDK_30s804591L003"] [product="brassinosteroid insensitive 1-associatedreceptor kinase 1"] [strand="+"]	1
pda-miR395_R-1_1ss14AG	PDK_30s1028201g011	2.5	19.246	1	20	1459	1478	CUGAAGUGUUUGGGGGAACU	GGUUCCACCAAACACUUCAA	Cleavage	[locus_tag="PDK_30s1028201L011"] [product="fkbp-rapamycin associated"] [strand="-"]	1
pda-miR395_R-1_1ss14AG	PDK_30s1186971g003	2.5	15.118	1	20	1756	1775	CUGAAGUGUUUGGGGGAACU	AGUUCCCCCAGAAGCUUUAG	Cleavage	[locus_tag="PDK_30s1186971L003"] [product="atp-dependent dna helicase"] [strand="-"]	1
pda-miR395_R-1_1ss14AG	PDK_30s1127011g012	3	18.604	1	20	31	50	CUGAAGUGUUUGGGGGAACU	AUUUCCCUCAAACACAUCAG	Cleavage	[locus_tag="PDK_30s1127011L012"] [product="similar to predicted protein"] [strand="-"]	1
pda-miR395_R-1_1ss14AG	PDK_30s829431g003	3	7.735	1	20	1426	1445	CUGAAGUGUUUGGGGGAACU	AUUUUUUCCAAACAUUUCAG	Cleavage	[locus_tag="PDK_30s829431L003"] [product="atp binding"] [strand="-"]	1
pda-5p-58294_251	PDK_30s964741g005	3	22.873	1	21	741	761	UCCGUUCGGCACUGGAUCGCC	GGCGAUCCAGGGAUGGACGGA	Translation	[locus_tag="PDK_30s964741L005"] [product="partial gene, no protein identified"] [strand="+"]	1
pda-miR168c-3p_R-1	PDK_30s967931g001	3	19.903	1	20	2524	2543	CCCGCCUUGCAUCAACUGAA	UGCAGUUGAUGCAAGUUGGG	Cleavage	[locus_tag="PDK_30s967931L001"] [product="esp4 (enhanced silencing phenotype 4) binding"] [strand="-"]	1
pda-miR535_L+1	PDK_30s1187081g002	2.5	17.302	1	21	1167	1187	CUGACAACGAGAGAGAGCACG	CUUGUUCUCUCUCAUUGUCAG	Cleavage	[locus_tag="PDK_30s1187081L002"] [product="potassium channel"] [strand="-"]	1
pda-miR535_L+1	PDK_30s764381g004	3	12.596	1	20	265	284	CUGACAACGAGAGAGAGCAC	GUUCUUUAUCUCGUUGUCGG	Cleavage	[locus_tag="PDK_30s764381L004"] [product="r2r3-myb transcriptional factor"] [strand="-"]	1
pda-miR166a-5p	PDK_30s865121g003	2.5	11.297	1	20	39	58	GGAAUGUUGUCUGGCUCGAG	CUCGACCCAGACAGCAUUCG	Cleavage	[locus_tag="PDK_30s865121L003"] [product="partial gene, no protein identified"] [strand="-"]	1
pda-miR166a-5p	PDK_30s708971g002	2.5	19.072	1	21	1203	1223	GGAAUGUUGUCUGGCUCGAGG	UCUCAAGCCAGCCAACAUUCU	Translation	[locus_tag="PDK_30s708971L002"] [product="u-box domain containing expressed"] [strand="+"]	1
pda-miR168a_R-1	PDK_30s1043821g002	3	15.069	1	20	650	669	UCGCUUGGUGCAGGUCGGGA	UCCCAACUUGCAACAAGUGA	Cleavage	[locus_tag="PDK_30s1043821L002"] [product="partial gene, no protein identified"] [strand="-"]	1
pda-3p-64863_213	PDK_30s1078311g009	3	21.85	1	20	325	344	UCUAUUCAAACAUUGACUGC	GCUGUUGAUGUUUGGAUGGA	Cleavage	[locus_tag="PDK_30s1078311L009"] [product="similar to predicted protein"] [strand="-"]	1
pda-miR156h-p3	PDK_30s680571g004	2.5	17.671	1	20	1	20	GCUCUCUAUGCUUCUGUCAU	AUGGCAGAAGCAAAGGGAGU	Cleavage	[locus_tag="PDK_30s680571L004"] [product="partial gene, no protein identified"] [strand="+"]	1
pda-miR156h-p3	PDK_30s687201g002	3	17.25	1	21	1933	1953	GCUCUCUAUGCUUCUGUCAUC	GAUGAUAUAGUCAUAGAGAGC	Translation	[locus_tag="PDK_30s687201L002"] [product="partial gene, no protein identified"] [strand="+"]	1
pda-miR156h-p3	PDK_30s1169121g004	2.5	9.512	1	20	979	998	GCUCUCUAUGCUUCUGUCAU	AUGACAGAAGAACGGAGAGC	Translation	[locus_tag="PDK_30s1169121L004"] [product="high mobility group family"] [strand="+"]	1
pda-miR156h-p3	PDK_30s951441g001	3	16.772	1	21	296	315	GCUCUCUAUGCUUCUGUCAUC	GAUGACAGAAG-AGAGAGAGC	Translation	[locus_tag="PDK_30s951441L001"] [product="partial gene, no protein identified"] [strand="-"]	1
pda-miR156h-p3	PDK_30s1139181g002	3	21.49	1	21	302	321	GCUCUCUAUGCUUCUGUCAUC	GAUGACAGAAG-AGAGAGAGC	Translation	[locus_tag="PDK_30s1139181L002"] [product="partial gene, no protein identified"] [strand="-"]	1
pda-3p-8373_3137	PDK_30s990651g001	2.5	14.827	1	20	2398	2417	CUGUAAACCGCACGACCCUU	UGGGGUCGUGCGGUUUACAU	Cleavage	[locus_tag="PDK_30s990651L001"] [product="autoinhibited calcium atpase"] [strand="+"]	1
pda-miR156b	PDK_30s789261g002	2	23.842	1	21	248	268	CUGACAGAAGAUAGAGAGCAC	GUGCUCUCUCUCUUCUGUCAA	Cleavage	[locus_tag="PDK_30s789261L002"] [product="partial gene, no protein identified"] [strand="+"]	1
pda-miR156b	PDK_30s772931g003	2	15.287	1	21	446	466	CUGACAGAAGAUAGAGAGCAC	GUGCUCUCUCUCUUCUGUCAU	Cleavage	[locus_tag="PDK_30s772931L003"] [product="partial gene, no protein identified"] [strand="+"]	1
pda-miR156b	PDK_30s756061g001	2	21.536	1	21	674	694	CUGACAGAAGAUAGAGAGCAC	GUGCUCUCUCUCUUCUGUCAA	Cleavage	[locus_tag="PDK_30s756061L001"] [product="partial gene, no protein identified"] [strand="+"]	1
pda-miR156b	PDK_30s882821g001	2	20.571	1	21	1365	1385	CUGACAGAAGAUAGAGAGCAC	GUGCUCUCUCUCUUCUGUCAA	Cleavage	[locus_tag="PDK_30s882821L001"] [product="partial gene, no protein identified"] [strand="+"]	1
pda-miR156b	PDK_30s670584g001	3	21.572	1	21	386	406	CUGACAGAAGAUAGAGAGCAC	GUGCUUCCUAUUUUCUGUCAA	Cleavage	[locus_tag="PDK_30s670584L001"] [product="3-hydroxyisobutyryl-coenzyme a expressed"] [strand="+"]	1
pda-miR156b	PDK_30s1020031g001	3	9.892	1	21	2992	3012	CUGACAGAAGAUAGAGAGCAC	GAGCUCUCUUUCUUCUGUCAC	Cleavage	[locus_tag="PDK_30s1020031L001"] [product="partial gene, no protein identified"] [strand="-"]	1
pda-miR156b	PDK_30s1211281g004	3	17.126	1	20	252	270	CUGACAGAAGAUAGAGAGCA	CGCUCUCUAUCU-CUGUCAG	Cleavage	[locus_tag="PDK_30s1211281L004"] [product="wall-associated kinase 4-like"] [strand="-"]	1
pda-5p-15197_1588	PDK_30s65509484g003	2.5	13.79	1	20	291	310	UCACAGGCUUUCUUGAACUA	CCGUUCAAGAAAGCCUGUGG	Cleavage	[locus_tag="PDK_30s65509484L003"] [product="growth-regulating factor 1"] [strand="+"]	1
pda-5p-15197_1588	PDK_30s1085001g001	2.5	17.242	1	20	377	396	UCACAGGCUUUCUUGAACUA	CCGUUCAAGAAAGCCUGUGG	Cleavage	[locus_tag="PDK_30s1085001L001"] [product="growth-regulating factor 3"] [strand="+"]	1
pda-5p-15197_1588	PDK_30s65509404g002	2.5	16.994	1	20	234	253	UCACAGGCUUUCUUGAACUA	CCGUUCAAGAAAGCCUGUGG	Cleavage	[locus_tag="PDK_30s65509404L002"] [product="growth-regulating factor 1"] [strand="+"]	1
pda-5p-15197_1588	PDK_30s922211g002	3	21.631	1	20	789	808	UCACAGGCUUUCUUGAACUA	UCGUUCAAGAAAGCAUGUGG	Cleavage	[locus_tag="PDK_30s922211L002"] [product="growth-regulating factor 1"] [strand="+"]	1
pda-5p-15197_1588	PDK_30s938881g003	3	21.107	1	20	516	535	UCACAGGCUUUCUUGAACUA	UGGUUCGGAGAAGCCUGUGA	Cleavage	[locus_tag="PDK_30s938881L003"] [product="similar to predicted protein"] [strand="+"]	1
pda-5p-15197_1588	PDK_30s739481g001	2.5	20.452	1	19	30	49	UCACAGGCUUUCUUG-AACU	AGUUGCAAGAAAGCCUGUGG	Cleavage	[locus_tag="PDK_30s739481L001"] [product="partial gene, no protein identified"] [strand="+"]	1
pda-miR168a	PDK_30s1043821g002	3	15.069	1	21	649	669	UCGCUUGGUGCAGGUCGGGAA	UUCCCAACUUGCAACAAGUGA	Cleavage	[locus_tag="PDK_30s1043821L002"] [product="partial gene, no protein identified"] [strand="-"]	1
pda-5p-92754_121	PDK_30s6550950g002	3	16.773	1	23	1066	1088	CGUGUUCAGCAAGCUCUGGGACC	GGAUUCAGAGCUUGUUGAAGACG	Cleavage	[locus_tag="PDK_30s6550950L002"] [product="transfactor-like protein"] [strand="-"]	1
pda-5p-92754_121	PDK_30s1075481g001	3	18.919	1	21	1616	1636	CGUGUUCAGCAAGCUCUGGGA	UUCCAGAGGUUGCUGAAUACU	Cleavage	[locus_tag="PDK_30s1075481L001"] [product="gtp-binding protein alpha"] [strand="+"]	1
pda-5p-92754_121	PDK_30s655081g013	3	17.456	1	20	1693	1712	CGUGUUCAGCAAGCUCUGGG	UCCAGGGCUUGCUGAACCUG	Cleavage	[locus_tag="PDK_30s655081L013"] [product="white-brown-complex abc transporter family"] [strand="-"]	1
pda-miR171h_L-1R+1_1ss2TC	PDK_30s983281g001	2.5	22.379	1	20	370	389	CGAGCCGAACCAAUAUCACU	UGUGAUUUUGGUUUGGCUCG	Cleavage	[locus_tag="PDK_30s983281L001"] [product="mpk14 - mapk"] [strand="+"]	1
pda-miR171h_L-1R+1_1ss2TC	PDK_30s973481g001	3	22.124	1	20	361	380	CGAGCCGAACCAAUAUCACU	AAUGAUAUUGGUUGGGUUCG	Cleavage	[locus_tag="PDK_30s973481L001"] [product="partial gene, no protein identified"] [strand="+"]	1
pda-3p-21009_1073	PDK_30s915331g005	3	15.97	1	21	195	215	UCUGUCCGGCACUGUUCAGCC	GGUUGAAUAGUGUUGGACAGU	Cleavage	[locus_tag="PDK_30s915331L005"] [product="partial gene, no protein identified"] [strand="-"]	1
pda-3p-21009_1073	PDK_30s1009331g001	3	23.625	1	21	647	667	UCUGUCCGGCACUGUUCAGCC	GGCUGAUCGGUGAUGGACAGA	Translation	[locus_tag="PDK_30s1009331L001"] [product="partial gene, no protein identified"] [strand="+"]	1
pda-3p-21009_1073	PDK_30s736461g001	3	19.35	1	21	272	292	UCUGUCCGGCACUGUUCAGCC	GGCUGAUCAGUGAUGGACGGA	Translation	[locus_tag="PDK_30s736461L001"] [product="partial gene, no protein identified"] [strand="+"]	1
pda-3p-44090_382	PDK_30s937331g001	1.5	23.754	1	20	726	745	UUCAAGAAAGUCAGUGGAAG	CUUCCACAGGCUUUCUUGAA	Cleavage	[locus_tag="PDK_30s937331L001"] [product="transcription activator"] [strand="-"]	1
pda-3p-44090_382	PDK_30s842421g002	1.5	21.612	1	20	996	1015	UUCAAGAAAGUCAGUGGAAG	CUUCCACAGGCUUUCUUGAA	Cleavage	[locus_tag="PDK_30s842421L002"] [product="transcription activator"] [strand="-"]	1
pda-3p-44090_382	PDK_30s897081g005	1.5	24.957	1	20	2136	2155	UUCAAGAAAGUCAGUGGAAG	CUUCCACAGGCUUUCUUGAA	Cleavage	[locus_tag="PDK_30s897081L005"] [product="c2h2 finger and ankyrin domain"] [strand="-"]	1
pda-3p-44090_382	PDK_30s1024341g003	3	15.042	1	20	602	621	UUCAAGAAAGUCAGUGGAAG	UUUUUACUGAUUUUCUUGAU	Cleavage	[locus_tag="PDK_30s1024341L003"] [product="partial gene, no protein identified"] [strand="+"]	1
pda-3p-44090_382	PDK_30s869931g001	2.5	21.226	1	20	263	282	UUCAAGAAAGUCAGUGGAAG	CUUGUGCUGAUUUUCUUGAA	Cleavage	[locus_tag="PDK_30s869931L001"] [product="similar to predicted protein"] [strand="+"]	1
pda-3p-44090_382	PDK_30s1006281g001	2.5	14.653	1	20	494	513	UUCAAGAAAGUCAGUGGAAG	CUUCCGUGGACUUUUUUGAA	Cleavage	[locus_tag="PDK_30s1006281L001"] [product="iaa-amino acid hydrolase"] [strand="+"]	1
pda-3p-44090_382	PDK_30s873951g014	3	21.641	1	20	524	543	UUCAAGAAAGUCAGUGGAAG	UUUUCACUUGUUUUCUUGAA	Cleavage	[locus_tag="PDK_30s873951L014"] [product="partial gene, no protein identified"] [strand="-"]	1
pda-3p-44090_382	PDK_30s1008861g005	2.5	24.123	1	20	219	238	UUCAAGAAAGUCAGUGGAAG	CUUCCACAUGCUUUCUUGAA	Cleavage	[locus_tag="PDK_30s1008861L005"] [product="growth-regulating factor 1"] [strand="-"]	1
pda-3p-44090_382	PDK_30s894521g002	3	14.664	1	20	1181	1200	UUCAAGAAAGUCAGUGGAAG	CUUUCACUGACAUUCUUAAA	Translation	[locus_tag="PDK_30s894521L002"] [product="partial gene, no protein identified"] [strand="+"]	1
pda-3p-44090_382	PDK_30s893331g003	3	21.547	1	20	1232	1251	UUCAAGAAAGUCAGUGGAAG	CUUUCCCUGGUUUUCUUGGA	Cleavage	[locus_tag="PDK_30s893331L003"] [product="partial gene, no protein identified"] [strand="-"]	1
pda-3p-44090_382	PDK_30s901301g004	2.5	21.448	1	20	476	495	UUCAAGAAAGUCAGUGGAAG	UUUCCACUGAACUUCUUGAA	Translation	[locus_tag="PDK_30s901301L004"] [product="partial gene, no protein identified"] [strand="+"]	1
pda-3p-44090_382	PDK_30s917701g002	3	16.264	1	20	1781	1800	UUCAAGAAAGUCAGUGGAAG	CUUUCACUGACAUUCUUAAA	Translation	[locus_tag="PDK_30s917701L002"] [product="partial gene, no protein identified"] [strand="+"]	1
pda-3p-44090_382	PDK_30s888861g003	2.5	18.912	1	20	2819	2838	UUCAAGAAAGUCAGUGGAAG	CUGAUACUGACUUUCUUGAA	Cleavage	[locus_tag="PDK_30s888861L003"] [product="isoleucyl-trna synthetase"] [strand="+"]	1
pda-3p-44090_382	PDK_30s673103g002	3	14.104	1	20	448	467	UUCAAGAAAGUCAGUGGAAG	CUACUGAUGACUUUCUUGAA	Cleavage	[locus_tag="PDK_30s673103L002"] [product="similar to predicted protein"] [strand="+"]	1
pda-3p-44090_382	PDK_30s827541g001	3	22.12	1	20	259	278	UUCAAGAAAGUCAGUGGAAG	CUUUCAAUGGAUUUCUUGAA	Translation	[locus_tag="PDK_30s827541L001"] [product="partial gene, no protein identified"] [strand="+"]	1
pda-3p-44090_382	PDK_30s894041g001	3	20.321	1	20	600	619	UUCAAGAAAGUCAGUGGAAG	UUUCCACAUGCUUUCUUGAA	Cleavage	[locus_tag="PDK_30s894041L001"] [product="transcription activator"] [strand="-"]	1
pda-miR167c_R+1	PDK_30s886891g002	3	18.061	1	20	983	1002	UGAAGCUGCCAGCAUGAUCU	AGAUCAUCUUGGUAGCUUUG	Cleavage	[locus_tag="PDK_30s886891L002"] [product="retrotransposon ty3-gypsy subclass"] [strand="-"]	1
pda-miR167c_R+1	PDK_30s1201081g001	3	14.943	1	21	493	513	UGAAGCUGCCAGCAUGAUCUG	UAUAUUAUCUUGGCAGCUUCA	Cleavage	[locus_tag="PDK_30s1201081L001"] [product="f-box-containing protein 2"] [strand="+"]	1
pda-miR167c_R+1	PDK_30s868111g005	3	17.131	1	20	2699	2718	UGAAGCUGCCAGCAUGAUCU	AGAUCAUGUCGGGAGCUUCG	Translation	[locus_tag="PDK_30s868111L005"] [product="similar to predicted protein"] [strand="-"]	1
pda-miR319_L+1R+1	PDK_30s1094971g006	1.5	17.68	1	20	2073	2092	UUUGGACUGAAGGGAGCUCC	GGAGCUCCCUUCAGUACAAA	Cleavage	[locus_tag="PDK_30s1094971L006"] [product="partial gene, no protein identified"] [strand="-"]	1
pda-miR319_L+1R+1	PDK_30s679071g001	2.5	24.65	1	21	1228	1248	UUUGGACUGAAGGGAGCUCCU	AGGAGUUUCUUUCAGUCCGAG	Cleavage	[locus_tag="PDK_30s679071L001"] [product="partial gene, no protein identified"] [strand="-"]	1
pda-miR319_L+1R+1	PDK_30s835621g004	2.5	19.907	1	21	1062	1082	UUUGGACUGAAGGGAGCUCCU	AGGGGCUUGCUUCAGUCCAAG	Cleavage	[locus_tag="PDK_30s835621L004"] [product="similar to predicted protein"] [strand="+"]	1
pda-miR319_L+1R+1	PDK_30s1165641g012	2.5	18.954	1	20	963	982	UUUGGACUGAAGGGAGCUCC	GGAGCUCCCUUCACUCCAAU	Cleavage	[locus_tag="PDK_30s1165641L012"] [product="partial gene, no protein identified"] [strand="+"]	1
pda-miR319_L+1R+1	PDK_30s734181g004	3	20.365	1	21	374	394	UUUGGACUGAAGGGAGCUCCU	AAGAGCUCCAUUCGGUCCAAG	Cleavage	[locus_tag="PDK_30s734181L004"] [product="hypothetical protein"] [strand="+"]	1
pda-miR319_L+1R+1	PDK_30s971331g001	3	13.07	1	21	233	253	UUUGGACUGAAGGGAGCUCCU	GGAAGCUCUCUUCAUUCCAAA	Cleavage	[locus_tag="PDK_30s971331L001"] [product="partial gene, no protein identified"] [strand="-"]	1
pda-miR160a-5p	PDK_30s951701g002	0.5	18.694	1	21	798	818	UGCCUGGCUCCCUGUAUGCCA	UGGCAUGCAGGGAGCCAGGCA	Cleavage	[locus_tag="PDK_30s951701L002"] [product="auxin response"] [strand="+"]	1
pda-miR160a-5p	PDK_30s718951g001	0	20.128	1	20	1378	1397	UGCCUGGCUCCCUGUAUGCC	GGCAUACAGGGAGCCAGGCA	Cleavage	[locus_tag="PDK_30s718951L001"] [product="similar to predicted protein"] [strand="+"]	1
pda-miR160a-5p	PDK_30s1131851g004	3	24.839	1	20	790	809	UGCCUGGCUCCCUGUAUGCC	GGCGUAGAGGGAGCCGGGCU	Cleavage	[locus_tag="PDK_30s1131851L004"] [product="similar to predicted protein"] [strand="-"]	1
pda-miR160a-5p	PDK_30s1124891g002	3	21.756	1	20	277	296	UGCCUGGCUCCCUGUAUGCC	GGCAUACAAGGAGCUUGGCA	Cleavage	[locus_tag="PDK_30s1124891L002"] [product="nac domain ipr003441"] [strand="-"]	1
pda-miR160a-5p	PDK_30s966231g001	3	21.747	1	20	1323	1342	UGCCUGGCUCCCUGUAUGCC	GUCAAGUAGGGAGCCAGGCA	Cleavage	[locus_tag="PDK_30s966231L001"] [product="similar to predicted protein"] [strand="+"]	1
pda-miR160a-5p	PDK_30s1036201g002	3	20.805	1	20	264	283	UGCCUGGCUCCCUGUAUGCC	GGCAUACGUGGAAUCAGGCA	Cleavage	[locus_tag="PDK_30s1036201L002"] [product="similar to predicted protein"] [strand="+"]	1
pda-miR156i-3p_2ss7CT22TG	PDK_30s675031g001	2.5	10.823	1	21	719	739	UGCUCAUUUCUCUUUCUGUCA	UAACAGAAAGAGAAAUCAGCA	Cleavage	[locus_tag="PDK_30s675031L001"] [product="partial gene, no protein identified"] [strand="+"]	1
pda-miR156i-3p_2ss7CT22TG	PDK_30s724031g001	3	6.053	1	22	497	518	UGCUCAUUUCUCUUUCUGUCAG	UUGAUAGAAAGAAAAAUGAGAA	Translation	[locus_tag="PDK_30s724031L001"] [product="coatomer delta subunit (delta-coat protein)(delta-cop)"] [strand="+"]	1
pda-miR156i-3p_2ss7CT22TG	PDK_30s740851g001	2.5	19.723	1	20	563	582	UGCUCAUUUCUCUUUCUGUC	GGCAGAAGGGGAAGUGGGCA	Cleavage	[locus_tag="PDK_30s740851L001"] [product="partial gene, no protein identified"] [strand="+"]	1
pda-miR156i-3p_2ss7CT22TG	PDK_30s1155291g001	3	15.936	1	20	1269	1288	UGCUCAUUUCUCUUUCUGUC	GACAGAAAGAGAAAUCAGAA	Cleavage	[locus_tag="PDK_30s1155291L001"] [product="protein kinase"] [strand="-"]	1
pda-miR156i-3p_2ss7CT22TG	PDK_30s955761g002	3	11.446	1	20	145	164	UGCUCAUUUCUCUUUCUGUC	GAUGGAAAGGGAACUGAGCA	Cleavage	[locus_tag="PDK_30s955761L002"] [product="similar to predicted protein"] [strand="+"]	1
pda-miR156i-3p_2ss7CT22TG	PDK_30s1027821g004	3	15.745	1	20	757	776	UGCUCAUUUCUCUUUCUGUC	GACAGGAGGAGAAGGGAGCA	Cleavage	[locus_tag="PDK_30s1027821L004"] [product="similar to predicted protein"] [strand="+"]	1
pda-miR156i-3p_2ss7CT22TG	PDK_30s938531g001	2.5	13.886	1	20	280	299	UGCUCAUUUCUCUUUCUGUC	GGUAGGAUGAGAAAUGAGCA	Cleavage	[locus_tag="PDK_30s938531L001"] [product="partial gene, no protein identified"] [strand="+"]	1
pda-miR156i-3p_2ss7CT22TG	PDK_30s978251g001	2.5	9.717	1	20	183	202	UGCUCAUUUCUCUUUCUGUC	GAAGGAAAGGGAAGUGAGCA	Cleavage	[locus_tag="PDK_30s978251L001"] [product="similar to predicted protein"] [strand="+"]	1
pda-miR166b-p3	PDK_30s729201g002	2.5	18.53	1	20	645	664	UCUCGGACCAGGCUUCAUUC	GGAUGAAGCCGGGUUCGAGG	Translation	[locus_tag="PDK_30s729201L002"] [product="zinc finger cchc-type and rna binding motif 1"] [strand="+"]	1
pda-miR166b-p3	PDK_30s745201g003	2.5	24.112	1	20	1562	1581	UCUCGGACCAGGCUUCAUUC	GAAGAGAGCCUGGUCCGAGA	Cleavage	[locus_tag="PDK_30s745201L003"] [product="endonuclease iii homologue"] [strand="-"]	1
pda-5p-2741_10004	PDK_30s1039241g001	3	15.518	1	23	3991	4013	GGGAUGGGGCUGGUUUGGAAAAC	GUUUUCCAAGCAAGUUUCAUCCC	Cleavage	[locus_tag="PDK_30s1039241L001"] [product="partial gene, no protein identified"] [strand="-"]	1
pda-5p-2741_10004	PDK_30s741321g004	3	20.448	1	23	169	191	GGGAUGGGGCUGGUUUGGAAAAC	GUCUUCCAAACUAGCUUCAUUCA	Cleavage	[locus_tag="PDK_30s741321L004"] [product="partial gene, no protein identified"] [strand="-"]	1
pda-5p-2741_10004	PDK_30s764081g001	2.5	9.652	1	20	1222	1241	GGGAUGGGGCUGGUUUGGAA	CUUCAAACCAGCCCCAUUCU	Cleavage	[locus_tag="PDK_30s764081L001"] [product="prli-interacting factor g"] [strand="-"]	1
pda-5p-2741_10004	PDK_30s1113361g005	3	8.459	1	22	14	35	GGGAUGGGGCUGGUUUGGAAAA	UAUUUCAAAUCAGCCCUAUUUU	Cleavage	[locus_tag="PDK_30s1113361L005"] [product="similar to predicted protein"] [strand="+"]	1
pda-5p-2741_10004	PDK_30s872861g004	3	12.62	1	23	700	722	GGGAUGGGGCUGGUUUGGAAAAC	GUCCUCCAAUCCAGCCCCGUCCU	Cleavage	[locus_tag="PDK_30s872861L004"] [product="prp18 domain containing protein"] [strand="-"]	1
pda-5p-2741_10004	PDK_30s855441g001	2.5	21.167	1	20	547	566	GGGAUGGGGCUGGUUUGGAA	UUCCAAAGUAGCCUCAUCCU	Cleavage	[locus_tag="PDK_30s855441L001"] [product="similar to predicted protein"] [strand="-"]	1
pda-5p-2741_10004	PDK_30s877611g002	3	21.798	1	22	430	451	GGGAUGGGGCUGGUUUGGAAAA	UCUCUCGAGCCAGCUCCAUCCC	Cleavage	[locus_tag="PDK_30s877611L002"] [product="protein phosphatase"] [strand="-"]	1
pda-miR535	PDK_30s1187081g002	3	17.049	1	20	1167	1186	UGACAACGAGAGAGAGCACG	CUUGUUCUCUCUCAUUGUCA	Cleavage	[locus_tag="PDK_30s1187081L002"] [product="potassium channel"] [strand="-"]	1
pda-miR535	PDK_30s1105251g001	3	13.652	1	20	2472	2491	UGACAACGAGAGAGAGCACG	UGUGGUCGCUCUCGUUGUUA	Cleavage	[locus_tag="PDK_30s1105251L001"] [product="plasma membrane-type calcium atpase"] [strand="+"]	1
pda-miR396_R-1_1ss7AG	PDK_30s1057761g004	2.5	13.707	1	20	38	57	UUCCACGGCUUUCUUGAACU	AGUUCAAGAAAGCCAUGGAU	Cleavage	[locus_tag="PDK_30s1057761L004"] [product="partial gene, no protein identified"] [strand="+"]	1
pda-miR396_R-1_1ss7AG	PDK_30s1096111g002	3	15.765	1	20	227	246	UUCCACGGCUUUCUUGAACU	AGUUCAAGGAUGUCGUGGAU	Translation	[locus_tag="PDK_30s1096111L002"] [product="1 domain containing expressed"] [strand="+"]	1
pda-miR396_R-1_1ss7AG	PDK_30s65509404g002	2.5	17.792	1	19	236	255	UUCCAC-GGCUUUCUUGAAC	GUUCAAGAAAGCCUGUGGAA	Cleavage	[locus_tag="PDK_30s65509404L002"] [product="growth-regulating factor 1"] [strand="+"]	1
pda-miR396_R-1_1ss7AG	PDK_30s1085001g001	2.5	17.378	1	19	379	398	UUCCAC-GGCUUUCUUGAAC	GUUCAAGAAAGCCUGUGGAA	Cleavage	[locus_tag="PDK_30s1085001L001"] [product="growth-regulating factor 3"] [strand="+"]	1
pda-miR396_R-1_1ss7AG	PDK_30s65509484g003	2.5	13.606	1	19	293	312	UUCCAC-GGCUUUCUUGAAC	GUUCAAGAAAGCCUGUGGAA	Cleavage	[locus_tag="PDK_30s65509484L003"] [product="growth-regulating factor 1"] [strand="+"]	1
pda-miR396_R-1_1ss7AG	PDK_30s922211g002	2.5	21.657	1	19	791	810	UUCCACG-GCUUUCUUGAAC	GUUCAAGAAAGCAUGUGGAA	Cleavage	[locus_tag="PDK_30s922211L002"] [product="growth-regulating factor 1"] [strand="+"]	1
pda-miR156a	PDK_30s789261g002	1	23.992	1	20	248	267	UGACAGAAGAGAGUGAGCAC	GUGCUCUCUCUCUUCUGUCA	Cleavage	[locus_tag="PDK_30s789261L002"] [product="partial gene, no protein identified"] [strand="+"]	1
pda-miR156a	PDK_30s772931g003	1	15.458	1	20	446	465	UGACAGAAGAGAGUGAGCAC	GUGCUCUCUCUCUUCUGUCA	Cleavage	[locus_tag="PDK_30s772931L003"] [product="partial gene, no protein identified"] [strand="+"]	1
pda-miR156a	PDK_30s756061g001	1	19.686	1	20	674	693	UGACAGAAGAGAGUGAGCAC	GUGCUCUCUCUCUUCUGUCA	Cleavage	[locus_tag="PDK_30s756061L001"] [product="partial gene, no protein identified"] [strand="+"]	1
pda-miR156a	PDK_30s882821g001	1	20.92	1	20	1365	1384	UGACAGAAGAGAGUGAGCAC	GUGCUCUCUCUCUUCUGUCA	Cleavage	[locus_tag="PDK_30s882821L001"] [product="partial gene, no protein identified"] [strand="+"]	1
pda-miR156a	PDK_30s704101g001	2.5	17.093	1	20	217	236	UGACAGAAGAGAGUGAGCAC	GUGCUCUCUCUCUUCGGUCA	Cleavage	[locus_tag="PDK_30s704101L001"] [product="partial gene, no protein identified"] [strand="-"]	1
pda-miR156a	PDK_30s1020031g001	2.5	9.497	1	20	2992	3011	UGACAGAAGAGAGUGAGCAC	GAGCUCUCUUUCUUCUGUCA	Cleavage	[locus_tag="PDK_30s1020031L001"] [product="partial gene, no protein identified"] [strand="-"]	1
pda-miR156a	PDK_30s670584g001	3	20.694	1	20	386	405	UGACAGAAGAGAGUGAGCAC	GUGCUUCCUAUUUUCUGUCA	Translation	[locus_tag="PDK_30s670584L001"] [product="3-hydroxyisobutyryl-coenzyme a expressed"] [strand="+"]	1
pda-miR396	PDK_30s687611g004	3	14.602	1	21	124	144	UUCCACAGCUUUCUUGAACUU	GAAUUCGAGAAAGUUGUGGAC	Cleavage	[locus_tag="PDK_30s687611L004"] [product="partial gene, no protein identified"] [strand="+"]	1
pda-miR396	PDK_30s783481g001	3	23.692	1	21	163	183	UUCCACAGCUUUCUUGAACUU	AAGCUGAAGGAAGCUGUGGAG	Cleavage	[locus_tag="PDK_30s783481L001"] [product="pentatricopeptide repeat-containing"] [strand="+"]	1
pda-miR396	PDK_30s1060371g001	3	15.04	1	21	211	231	UUCCACAGCUUUCUUGAACUU	GAGUUCAAGAAAAUUAUGGAA	Translation	[locus_tag="PDK_30s1060371L001"] [product="partial gene, no protein identified"] [strand="+"]	1
pda-miR396	PDK_30s65509404g002	2	17.792	1	19	236	255	UUCCACA-GCUUUCUUGAAC	GUUCAAGAAAGCCUGUGGAA	Cleavage	[locus_tag="PDK_30s65509404L002"] [product="growth-regulating factor 1"] [strand="+"]	1
pda-miR396	PDK_30s1085001g001	2	17.378	1	19	379	398	UUCCACA-GCUUUCUUGAAC	GUUCAAGAAAGCCUGUGGAA	Cleavage	[locus_tag="PDK_30s1085001L001"] [product="growth-regulating factor 3"] [strand="+"]	1
pda-miR396	PDK_30s65509484g003	2	13.606	1	19	293	312	UUCCACA-GCUUUCUUGAAC	GUUCAAGAAAGCCUGUGGAA	Cleavage	[locus_tag="PDK_30s65509484L003"] [product="growth-regulating factor 1"] [strand="+"]	1
pda-miR396	PDK_30s922211g002	2	21.657	1	19	791	810	UUCCACA-GCUUUCUUGAAC	GUUCAAGAAAGCAUGUGGAA	Cleavage	[locus_tag="PDK_30s922211L002"] [product="growth-regulating factor 1"] [strand="+"]	1
pda-miR156a_L+1	PDK_30s789261g002	2	23.842	1	21	248	268	CUGACAGAAGAGAGUGAGCAC	GUGCUCUCUCUCUUCUGUCAA	Cleavage	[locus_tag="PDK_30s789261L002"] [product="partial gene, no protein identified"] [strand="+"]	1
pda-miR156a_L+1	PDK_30s772931g003	2	15.287	1	21	446	466	CUGACAGAAGAGAGUGAGCAC	GUGCUCUCUCUCUUCUGUCAU	Cleavage	[locus_tag="PDK_30s772931L003"] [product="partial gene, no protein identified"] [strand="+"]	1
pda-miR156a_L+1	PDK_30s756061g001	2	21.536	1	21	674	694	CUGACAGAAGAGAGUGAGCAC	GUGCUCUCUCUCUUCUGUCAA	Cleavage	[locus_tag="PDK_30s756061L001"] [product="partial gene, no protein identified"] [strand="+"]	1
pda-miR156a_L+1	PDK_30s882821g001	2	20.571	1	21	1365	1385	CUGACAGAAGAGAGUGAGCAC	GUGCUCUCUCUCUUCUGUCAA	Cleavage	[locus_tag="PDK_30s882821L001"] [product="partial gene, no protein identified"] [strand="+"]	1
pda-miR156a_L+1	PDK_30s940711g002	3	18.089	1	20	401	420	CUGACAGAAGAGAGUGAGCA	UGUUCACUGUCUUCUGUCUG	Cleavage	[locus_tag="PDK_30s940711L002"] [product="harpin-induced protein"] [strand="+"]	1
pda-miR166a_R-1	PDK_30s693742g001	2	23.664	1	20	591	610	UCGGACCAGGCUUCAUUCCC	UGGGAUGAAGCCUGGUCCGG	Cleavage	[locus_tag="PDK_30s693742L001"] [product="homeodomain-leucine zipper trancription factorhb-3"] [strand="+"]	1
pda-miR166a_R-1	PDK_30s929391g001	2	20.984	1	20	492	511	UCGGACCAGGCUUCAUUCCC	UGGGAUGAAGCCUGGUCCGG	Cleavage	[locus_tag="PDK_30s929391L001"] [product="rolled expressed"] [strand="+"]	1
pda-miR166a_R-1	PDK_30s729201g002	2	16.83	1	20	643	662	UCGGACCAGGCUUCAUUCCC	GGGGAUGAAGCCGGGUUCGA	Cleavage	[locus_tag="PDK_30s729201L002"] [product="zinc finger cchc-type and rna binding motif 1"] [strand="+"]	1
pda-miR166a_R-1	PDK_30s764871g001	2.5	20.248	1	20	1372	1391	UCGGACCAGGCUUCAUUCCC	GGGAAUGGUGCCUGGUCCGC	Cleavage	[locus_tag="PDK_30s764871L001"] [product="partial gene, no protein identified"] [strand="+"]	1
pda-miR166a_R-1	PDK_30s745201g003	2.5	22.028	1	20	1560	1579	UCGGACCAGGCUUCAUUCCC	GGGAAGAGAGCCUGGUCCGA	Cleavage	[locus_tag="PDK_30s745201L003"] [product="endonuclease iii homologue"] [strand="-"]	1
pda-miR156e	PDK_30s789261g002	1	23.842	1	21	248	268	UUGACAGAAGAUAGAGAGCAC	GUGCUCUCUCUCUUCUGUCAA	Cleavage	[locus_tag="PDK_30s789261L002"] [product="partial gene, no protein identified"] [strand="+"]	1
pda-miR156e	PDK_30s756061g001	1	21.536	1	21	674	694	UUGACAGAAGAUAGAGAGCAC	GUGCUCUCUCUCUUCUGUCAA	Cleavage	[locus_tag="PDK_30s756061L001"] [product="partial gene, no protein identified"] [strand="+"]	1
pda-miR156e	PDK_30s882821g001	1	20.571	1	21	1365	1385	UUGACAGAAGAUAGAGAGCAC	GUGCUCUCUCUCUUCUGUCAA	Cleavage	[locus_tag="PDK_30s882821L001"] [product="partial gene, no protein identified"] [strand="+"]	1
pda-miR156e	PDK_30s772931g003	2	15.287	1	21	446	466	UUGACAGAAGAUAGAGAGCAC	GUGCUCUCUCUCUUCUGUCAU	Cleavage	[locus_tag="PDK_30s772931L003"] [product="partial gene, no protein identified"] [strand="+"]	1
pda-miR156e	PDK_30s670584g001	2	21.572	1	21	386	406	UUGACAGAAGAUAGAGAGCAC	GUGCUUCCUAUUUUCUGUCAA	Cleavage	[locus_tag="PDK_30s670584L001"] [product="3-hydroxyisobutyryl-coenzyme a expressed"] [strand="+"]	1
pda-miR156e	PDK_30s704101g001	2.5	17.093	1	21	217	237	UUGACAGAAGAUAGAGAGCAC	GUGCUCUCUCUCUUCGGUCAA	Cleavage	[locus_tag="PDK_30s704101L001"] [product="partial gene, no protein identified"] [strand="-"]	1
pda-miR156e	PDK_30s1020031g001	3	9.892	1	21	2992	3012	UUGACAGAAGAUAGAGAGCAC	GAGCUCUCUUUCUUCUGUCAC	Cleavage	[locus_tag="PDK_30s1020031L001"] [product="partial gene, no protein identified"] [strand="-"]	1
pda-miR156e	PDK_30s1172771g001	3	17.634	1	20	1562	1581	UUGACAGAAGAUAGAGAGCA	AGCUCUCUAUAUGCUGUCAA	Translation	[locus_tag="PDK_30s1172771L001"] [product="dna topoisomerase i"] [strand="+"]	1
pda-miR156h	PDK_30s789261g002	1	23.842	1	21	248	268	UUGACAGAAGAUAGAGAGCAC	GUGCUCUCUCUCUUCUGUCAA	Cleavage	[locus_tag="PDK_30s789261L002"] [product="partial gene, no protein identified"] [strand="+"]	1
pda-miR156h	PDK_30s756061g001	1	21.536	1	21	674	694	UUGACAGAAGAUAGAGAGCAC	GUGCUCUCUCUCUUCUGUCAA	Cleavage	[locus_tag="PDK_30s756061L001"] [product="partial gene, no protein identified"] [strand="+"]	1
pda-miR156h	PDK_30s882821g001	1	20.571	1	21	1365	1385	UUGACAGAAGAUAGAGAGCAC	GUGCUCUCUCUCUUCUGUCAA	Cleavage	[locus_tag="PDK_30s882821L001"] [product="partial gene, no protein identified"] [strand="+"]	1
pda-miR156h	PDK_30s772931g003	2	15.287	1	21	446	466	UUGACAGAAGAUAGAGAGCAC	GUGCUCUCUCUCUUCUGUCAU	Cleavage	[locus_tag="PDK_30s772931L003"] [product="partial gene, no protein identified"] [strand="+"]	1
pda-miR156h	PDK_30s670584g001	2	21.572	1	21	386	406	UUGACAGAAGAUAGAGAGCAC	GUGCUUCCUAUUUUCUGUCAA	Cleavage	[locus_tag="PDK_30s670584L001"] [product="3-hydroxyisobutyryl-coenzyme a expressed"] [strand="+"]	1
pda-miR156h	PDK_30s704101g001	2.5	17.093	1	21	217	237	UUGACAGAAGAUAGAGAGCAC	GUGCUCUCUCUCUUCGGUCAA	Cleavage	[locus_tag="PDK_30s704101L001"] [product="partial gene, no protein identified"] [strand="-"]	1
pda-miR156h	PDK_30s1020031g001	3	9.892	1	21	2992	3012	UUGACAGAAGAUAGAGAGCAC	GAGCUCUCUUUCUUCUGUCAC	Cleavage	[locus_tag="PDK_30s1020031L001"] [product="partial gene, no protein identified"] [strand="-"]	1
pda-miR156h	PDK_30s1172771g001	3	17.634	1	20	1562	1581	UUGACAGAAGAUAGAGAGCA	AGCUCUCUAUAUGCUGUCAA	Translation	[locus_tag="PDK_30s1172771L001"] [product="dna topoisomerase i"] [strand="+"]	1
pda-miR162_1ss20AG	PDK_30s1006931g001	2.5	19.003	1	21	1476	1496	UCGAUAAACCUCUGCAUCCGG	UCAGAUGCAGAGGUUCAUCGA	Cleavage	[locus_tag="PDK_30s1006931L001"] [product="similar to predicted protein"] [strand="+"]	1
pda-miR2916_R-3_1ss6AG	PDK_30s1122501g006	2.5	20.719	1	20	795	814	UGGGGGCUCGAAGACGAUCA	UGGUAGUCGUCGAGCCCCCA	Cleavage	[locus_tag="PDK_30s1122501L006"] [product="leucine rich repeat family expressed"] [strand="-"]	1
pda-miR2916_R-3_1ss6AG	PDK_30s727661g002	3	20.945	1	20	768	788	UGGGGGCUCG-AAGACGAUCA	UGAUUGUCUUAUGAGCCCCCA	Translation	[locus_tag="PDK_30s727661L002"] [product="similar to predicted protein"] [strand="+"]	1
pda-miR2916_R-3_1ss6AG	PDK_30s745441g001	3	17.009	1	20	935	954	UGGGGGCUCGAAGACGAUCA	UGAUGGUCAUCGAGCCUUCA	Cleavage	[locus_tag="PDK_30s745441L001"] [product="secondary cell wall-related glycosyltransferasefamily 8"] [strand="+"]	1
pda-miR2916_R-3_1ss6AG	PDK_30s6550926g026	3	17.233	1	20	440	459	UGGGGGCUCGAAGACGAUCA	UUAUCGUCUUCAAGCUUCCA	Translation	[locus_tag="PDK_30s6550926L026"] [product="nucleic acid binding"] [strand="-"]	1
pda-miR2916_R-3_1ss6AG	PDK_30s1141531g001	3	21.259	1	20	80	99	UGGGGGCUCGAAGACGAUCA	UGAGUGUCGUCGAGCUCCCA	Cleavage	[locus_tag="PDK_30s1141531L001"] [product="partial gene, no protein identified"] [strand="+"]	1
pda-miR396_1ss21TG	PDK_30s1150791g004	3	22.869	1	21	208	228	UUCCACAGCUUUCUUGAACUG	CAGUUCAUGGAUGCUGUGGAG	Translation	[locus_tag="PDK_30s1150791L004"] [product="partial gene, no protein identified"] [strand="+"]	1
pda-miR396_1ss21TG	PDK_30s65509404g002	2	17.792	1	21	234	255	UUCCACA-GCUUUCUUGAACUG	CCGUUCAAGAAAGCCUGUGGAA	Cleavage	[locus_tag="PDK_30s65509404L002"] [product="growth-regulating factor 1"] [strand="+"]	1
pda-miR396_1ss21TG	PDK_30s1085001g001	2	17.378	1	21	377	398	UUCCACA-GCUUUCUUGAACUG	CCGUUCAAGAAAGCCUGUGGAA	Cleavage	[locus_tag="PDK_30s1085001L001"] [product="growth-regulating factor 3"] [strand="+"]	1
pda-miR396_1ss21TG	PDK_30s65509484g003	2	13.606	1	21	291	312	UUCCACA-GCUUUCUUGAACUG	CCGUUCAAGAAAGCCUGUGGAA	Cleavage	[locus_tag="PDK_30s65509484L003"] [product="growth-regulating factor 1"] [strand="+"]	1
pda-miR396_1ss21TG	PDK_30s687611g004	3	14.602	1	20	125	144	UUCCACAGCUUUCUUGAACU	AAUUCGAGAAAGUUGUGGAC	Cleavage	[locus_tag="PDK_30s687611L004"] [product="partial gene, no protein identified"] [strand="+"]	1
pda-miR396_1ss21TG	PDK_30s922211g002	2	21.657	1	19	791	810	UUCCACA-GCUUUCUUGAAC	GUUCAAGAAAGCAUGUGGAA	Cleavage	[locus_tag="PDK_30s922211L002"] [product="growth-regulating factor 1"] [strand="+"]	1
pda-miR396_1ss21TG	PDK_30s1060371g001	3	15.04	1	20	212	231	UUCCACAGCUUUCUUGAACU	AGUUCAAGAAAAUUAUGGAA	Translation	[locus_tag="PDK_30s1060371L001"] [product="partial gene, no protein identified"] [strand="+"]	1
pda-miR396_1ss21TG	PDK_30s1155011g001	3	16.178	1	21	301	321	UUCCACAGCUUUCUUGAACUG	UGGAUCAAGAAGGGUGUGGAA	Cleavage	[locus_tag="PDK_30s1155011L001"] [product="retrotransposon ty3-gypsy subclass"] [strand="+"]	1
pda-miR166i-3p_L+2R-2	PDK_30s729201g002	3	18.53	1	21	644	664	UCUCGGAUCAGGCUUCAUUCC	GGGAUGAAGCCGGGUUCGAGG	Translation	[locus_tag="PDK_30s729201L002"] [product="zinc finger cchc-type and rna binding motif 1"] [strand="+"]	1
pda-miR166i-3p_L+2R-2	PDK_30s745201g003	3	24.112	1	21	1561	1581	UCUCGGAUCAGGCUUCAUUCC	GGAAGAGAGCCUGGUCCGAGA	Cleavage	[locus_tag="PDK_30s745201L003"] [product="endonuclease iii homologue"] [strand="-"]	1
pda-miR396e_L-1_1ss7-A	PDK_30s65509484g003	1	13.649	1	21	291	311	UCCACAGGCUUUCUUGAACUG	CCGUUCAAGAAAGCCUGUGGA	Cleavage	[locus_tag="PDK_30s65509484L003"] [product="growth-regulating factor 1"] [strand="+"]	1
pda-miR396e_L-1_1ss7-A	PDK_30s1085001g001	1	17.363	1	21	377	397	UCCACAGGCUUUCUUGAACUG	CCGUUCAAGAAAGCCUGUGGA	Cleavage	[locus_tag="PDK_30s1085001L001"] [product="growth-regulating factor 3"] [strand="+"]	1
pda-miR396e_L-1_1ss7-A	PDK_30s65509404g002	1	17.856	1	21	234	254	UCCACAGGCUUUCUUGAACUG	CCGUUCAAGAAAGCCUGUGGA	Cleavage	[locus_tag="PDK_30s65509404L002"] [product="growth-regulating factor 1"] [strand="+"]	1
pda-miR396e_L-1_1ss7-A	PDK_30s739481g001	2	20.474	1	21	29	50	UCCACAGGCUUUCUUG-AACUG	CAGUUGCAAGAAAGCCUGUGGA	Cleavage	[locus_tag="PDK_30s739481L001"] [product="partial gene, no protein identified"] [strand="+"]	1
pda-miR396e_L-1_1ss7-A	PDK_30s922211g002	2.5	21.631	1	20	790	809	UCCACAGGCUUUCUUGAACU	CGUUCAAGAAAGCAUGUGGA	Cleavage	[locus_tag="PDK_30s922211L002"] [product="growth-regulating factor 1"] [strand="+"]	1
pda-miR396e_L-1_1ss7-A	PDK_30s746021g002	3	17.648	1	20	1837	1856	UCCACAGGCUUUCUUGAACU	AGUUCUAGGGAGUUUGUGGA	Cleavage	[locus_tag="PDK_30s746021L002"] [product="rsh1 (rela-spot homolog 1) catalytic"] [strand="+"]	1
pda-miR396e_L-1_1ss7-A	PDK_30s1208661g001	3	23.124	1	20	248	267	UCCACAGGCUUUCUUGAACU	AGUGCAUCAAAGCCUGUGGA	Cleavage	[locus_tag="PDK_30s1208661L001"] [product="partial gene, no protein identified"] [strand="+"]	1
pda-miR166a	PDK_30s693742g001	2	23.664	1	20	591	610	UCGGACCAGGCUUCAUUCCC	UGGGAUGAAGCCUGGUCCGG	Cleavage	[locus_tag="PDK_30s693742L001"] [product="homeodomain-leucine zipper trancription factorhb-3"] [strand="+"]	1
pda-miR166a	PDK_30s929391g001	2	20.984	1	20	492	511	UCGGACCAGGCUUCAUUCCC	UGGGAUGAAGCCUGGUCCGG	Cleavage	[locus_tag="PDK_30s929391L001"] [product="rolled expressed"] [strand="+"]	1
pda-miR166a	PDK_30s729201g002	2	16.83	1	20	643	662	UCGGACCAGGCUUCAUUCCC	GGGGAUGAAGCCGGGUUCGA	Cleavage	[locus_tag="PDK_30s729201L002"] [product="zinc finger cchc-type and rna binding motif 1"] [strand="+"]	1
pda-miR166a	PDK_30s764871g001	2.5	20.248	1	20	1372	1391	UCGGACCAGGCUUCAUUCCC	GGGAAUGGUGCCUGGUCCGC	Cleavage	[locus_tag="PDK_30s764871L001"] [product="partial gene, no protein identified"] [strand="+"]	1
pda-miR166a	PDK_30s745201g003	2.5	22.028	1	20	1560	1579	UCGGACCAGGCUUCAUUCCC	GGGAAGAGAGCCUGGUCCGA	Cleavage	[locus_tag="PDK_30s745201L003"] [product="endonuclease iii homologue"] [strand="-"]	1
pda-5p-5696_4736	PDK_30s656941g003	3	22.358	1	20	2510	2529	CAAGGGAAGUCGGCAAAACG	GGAUUUGCCGACUUCUUUUG	Cleavage	[locus_tag="PDK_30s656941L003"] [product="partial gene, no protein identified"] [strand="-"]	1
pda-5p-5696_4736	PDK_30s693381g001	3	13.485	1	20	563	582	CAAGGGAAGUCGGCAAAACG	CGUUUCACCGGCUUCUCUUG	Cleavage	[locus_tag="PDK_30s693381L001"] [product="vacuolar protein sorting"] [strand="+"]	1
