# Supplementary material for: A genome-wide identification of the miRNAome in response to salinity stress in date palm (Phoenix dactylifera L.)
Source: Front Plant Sci. 2015 Nov 5;6:946. doi: 10.3389/fpls.2015.00946 (PMC4633500; doi:10.3389/fpls.2015.00946)
Supplement: Supplementary file 7 [file Table7.XLSX]

## Sheet: Sheet1
Table S7. Mapping of potential targets for miRNA isolated from P. dactylifera leaves on some metabolic pathways using the Kyoto Encyclopedia of Genes and Genomes (KEGG).
Pathway	Seqs in Pathway	Enzyme	Ezyme ID	Seqs of Enzyme	Seqs	Pathway ID	Pathway Image
Purine metabolism	12	phosphatase	ec:3.6.1.15	4	PDK_30s692531g006, PDK_30s925571g001, PDK_30s764411g002, PDK_30s915891g001	map00230	map00230_20141011124237.png
Purine metabolism	12	DNA polymerase	ec:2.7.7.7	2	PDK_30s839611g001, PDK_30s827411g002	map00230	map00230_20141011124237.png
Purine metabolism	12	RNA polymerase	ec:2.7.7.6	1	PDK_30s770751g001	map00230	map00230_20141011124237.png
Purine metabolism	12	adenylyltransferase	ec:2.7.7.4	1	PDK_30s986061g002	map00230	map00230_20141011124237.png
Purine metabolism	12	adenylpyrophosphatase	ec:3.6.1.3	4	PDK_30s655081g013, PDK_30s973851g002, PDK_30s927361g003, PDK_30s1125961g002	map00230	map00230_20141011124237.png
Glycolysis / Gluconeogenesis	7	aldolase	ec:4.1.2.13	2	PDK_30s925071g011, PDK_30s1061801g004	map00010	map00010_20141011124007.png
Glycolysis / Gluconeogenesis	7	phosphohexokinase	ec:2.7.1.11	1	PDK_30s745071g002	map00010	map00010_20141011124007.png
Glycolysis / Gluconeogenesis	7	hydratase	ec:4.2.1.11	1	PDK_30s776781g006	map00010	map00010_20141011124007.png
Glycolysis / Gluconeogenesis	7	acetyltransferase	ec:2.3.1.12	1	PDK_30s970051g001	map00010	map00010_20141011124007.png
Glycolysis / Gluconeogenesis	7	glucokinase (phosphorylating)	ec:2.7.1.2	1	PDK_30s1154711g002	map00010	map00010_20141011124007.png
Glycolysis / Gluconeogenesis	7	dehydrogenase (NAD+)	ec:1.2.1.3	1	PDK_30s665281g001	map00010	map00010_20141011124007.png
Fructose and mannose metabolism	6	aldolase	ec:4.1.2.13	2	PDK_30s925071g011, PDK_30s1061801g004	map00051	map00051_20141011125025.png
Fructose and mannose metabolism	6	phosphohexokinase	ec:2.7.1.11	1	PDK_30s745071g002	map00051	map00051_20141011125025.png
Fructose and mannose metabolism	6	fructokinase (phosphorylating)	ec:2.7.1.4	1	PDK_30s1154711g002	map00051	map00051_20141011125025.png
Fructose and mannose metabolism	6	1-phosphotransferase	ec:2.7.1.90	1	PDK_30s745071g002	map00051	map00051_20141011125025.png
Fructose and mannose metabolism	6	isomerase	ec:5.3.1.6	1	PDK_30s1016851g001	map00051	map00051_20141011125025.png
Fructose and mannose metabolism	6	isomerase	ec:5.3.1.5	1	PDK_30s1161861g002	map00051	map00051_20141011125025.png
Starch and sucrose metabolism	6	alpha-glucosidase	ec:3.2.1.48	1	PDK_30s722171g012	map00500	map00500_20141011125103.png
Starch and sucrose metabolism	6	glycogenase	ec:3.2.1.1	1	PDK_30s821571g001	map00500	map00500_20141011125103.png
Starch and sucrose metabolism	6	phosphatase	ec:3.1.3.24	1	PDK_30s655081g010	map00500	map00500_20141011125103.png
Starch and sucrose metabolism	6	invertase	ec:3.2.1.26	1	PDK_30s722171g012	map00500	map00500_20141011125103.png
Starch and sucrose metabolism	6	gentiobiase	ec:3.2.1.21	1	PDK_30s747721g001	map00500	map00500_20141011125103.png
Starch and sucrose metabolism	6	synthase (UDP-forming)	ec:2.4.1.12	1	PDK_30s749151g001	map00500	map00500_20141011125103.png
Starch and sucrose metabolism	6	fructokinase (phosphorylating)	ec:2.7.1.4	1	PDK_30s1154711g002	map00500	map00500_20141011125103.png
Starch and sucrose metabolism	6	glucokinase (phosphorylating)	ec:2.7.1.2	1	PDK_30s1154711g002	map00500	map00500_20141011125103.png
Methane metabolism	4	aldolase	ec:4.1.2.13	2	PDK_30s925071g011, PDK_30s1061801g004	map00680	map00680_20141011124041.png
Methane metabolism	4	phosphohexokinase	ec:2.7.1.11	1	PDK_30s745071g002	map00680	map00680_20141011124041.png
Methane metabolism	4	hydratase	ec:4.2.1.11	1	PDK_30s776781g006	map00680	map00680_20141011124041.png
Pentose phosphate pathway	4	aldolase	ec:4.1.2.13	2	PDK_30s925071g011, PDK_30s1061801g004	map00030	map00030_20141011124509.png
Pentose phosphate pathway	4	phosphohexokinase	ec:2.7.1.11	1	PDK_30s745071g002	map00030	map00030_20141011124509.png
Pentose phosphate pathway	4	isomerase	ec:5.3.1.6	1	PDK_30s1016851g001	map00030	map00030_20141011124509.png
Tryptophan metabolism	4	monooxygenase	ec:1.14.14.1	1	PDK_30s1141931g002	map00380	map00380_20141011124525.png
Tryptophan metabolism	4	oxidase	ec:1.2.3.7	2	PDK_30s807021g003, PDK_30s1020241g002	map00380	map00380_20141011124525.png
Tryptophan metabolism	4	dehydrogenase (NAD+)	ec:1.2.1.3	1	PDK_30s665281g001	map00380	map00380_20141011124525.png
Thiamine metabolism	4	phosphatase	ec:3.6.1.15	4	PDK_30s692531g006, PDK_30s925571g001, PDK_30s764411g002, PDK_30s915891g001	map00730	map00730_20141011124711.png
Phenylpropanoid biosynthesis	3	lactoperoxidase	ec:1.11.1.7	1	PDK_30s729641g001	map00940	map00940_20141011123846.png
Phenylpropanoid biosynthesis	3	gentiobiase	ec:3.2.1.21	1	PDK_30s747721g001	map00940	map00940_20141011123846.png
Phenylpropanoid biosynthesis	3	dehydrogenase	ec:1.2.1.68	1	PDK_30s665281g001	map00940	map00940_20141011123846.png
Aminoacyl-tRNA biosynthesis	3	ligase	ec:6.1.1.5	1	PDK_30s888861g003	map00970	map00970_20141011123947.png
Aminoacyl-tRNA biosynthesis	3	ligase	ec:6.1.1.4	1	PDK_30s749061g001	map00970	map00970_20141011123947.png
Aminoacyl-tRNA biosynthesis	3	ligase	ec:6.1.1.14	1	PDK_30s1147711g001	map00970	map00970_20141011123947.png
Phenylalanine metabolism	3	lactoperoxidase	ec:1.11.1.7	1	PDK_30s729641g001	map00360	map00360_20141011124102.png
Phenylalanine metabolism	3	hydrolase	ec:3.5.1.32	2	PDK_30s1106101g003, PDK_30s1006281g001	map00360	map00360_20141011124102.png
Carbon fixation in photosynthetic organisms	3	aldolase	ec:4.1.2.13	2	PDK_30s925071g011, PDK_30s1061801g004	map00710	map00710_20141011124259.png
Carbon fixation in photosynthetic organisms	3	isomerase	ec:5.3.1.6	1	PDK_30s1016851g001	map00710	map00710_20141011124259.png
Oxidative phosphorylation	3	oxidase	ec:1.9.3.1	2	PDK_30s765961g002, PDK_30s914621g001	map00190	map00190_20141011124428.png
Oxidative phosphorylation	3	dehydrogenase	ec:1.6.99.3	1	PDK_30s968351g006	map00190	map00190_20141011124428.png
Valine, leucine and isoleucine degradation	3	(2-methylpropanoyl)transferase	ec:2.3.1.168	1	PDK_30s970051g001	map00280	map00280_20141011124648.png
Valine, leucine and isoleucine degradation	3	lyase	ec:4.1.3.4	1	PDK_30s759711g003	map00280	map00280_20141011124648.png
Valine, leucine and isoleucine degradation	3	dehydrogenase (NAD+)	ec:1.2.1.3	1	PDK_30s665281g001	map00280	map00280_20141011124648.png
Galactose metabolism	3	phosphohexokinase	ec:2.7.1.11	1	PDK_30s745071g002	map00052	map00052_20141011125012.png
Galactose metabolism	3	invertase	ec:3.2.1.26	1	PDK_30s722171g012	map00052	map00052_20141011125012.png
Galactose metabolism	3	glucokinase (phosphorylating)	ec:2.7.1.2	1	PDK_30s1154711g002	map00052	map00052_20141011125012.png
Glycerophospholipid metabolism	3	dehydrogenase (NAD+)	ec:1.1.1.8	1	PDK_30s854261g002	map00564	map00564_20141011125125.png
Glycerophospholipid metabolism	3	phosphodiesterase	ec:3.1.4.46	1	PDK_30s1077261g001	map00564	map00564_20141011125125.png
Glycerophospholipid metabolism	3	dehydrogenase [NAD(P)+]	ec:1.1.1.94	1	PDK_30s854261g002	map00564	map00564_20141011125125.png
Glycerophospholipid metabolism	3	D	ec:3.1.4.4	1	PDK_30s820371g001	map00564	map00564_20141011125125.png
Pyrimidine metabolism	3	DNA polymerase	ec:2.7.7.7	2	PDK_30s839611g001, PDK_30s827411g002	map00240	map00240_20141011125214.png
Pyrimidine metabolism	3	RNA polymerase	ec:2.7.7.6	1	PDK_30s770751g001	map00240	map00240_20141011125214.png
Aminobenzoate degradation	2	monooxygenase	ec:1.14.14.1	1	PDK_30s1141931g002	map00627	map00627_20141011123723.png
Aminobenzoate degradation	2	phosphatase	ec:3.1.3.2	1	PDK_30s759641g001	map00627	map00627_20141011123723.png
Pyruvate metabolism	2	acetyltransferase	ec:2.3.1.12	1	PDK_30s970051g001	map00620	map00620_20141011123840.png
Pyruvate metabolism	2	dehydrogenase (NAD+)	ec:1.2.1.3	1	PDK_30s665281g001	map00620	map00620_20141011123840.png
Butanoate metabolism	2	lyase	ec:4.1.3.4	1	PDK_30s759711g003	map00650	map00650_20141011123924.png
Butanoate metabolism	2	synthase	ec:2.2.1.6	1	PDK_30s1122781g001	map00650	map00650_20141011123924.png
Pentose and glucuronate interconversions	2	dehydrogenase (NAD+)	ec:1.2.1.3	1	PDK_30s665281g001	map00040	map00040_20141011124021.png
Pentose and glucuronate interconversions	2	isomerase	ec:5.3.1.5	1	PDK_30s1161861g002	map00040	map00040_20141011124021.png
Fatty acid degradation	2	1-monooxygenase	ec:1.14.15.3	1	PDK_30s1141931g002	map00071	map00071_20141011124126.png
Fatty acid degradation	2	monooxygenase	ec:1.14.14.1	1	PDK_30s1141931g002	map00071	map00071_20141011124126.png
Fatty acid degradation	2	dehydrogenase (NAD+)	ec:1.2.1.3	1	PDK_30s665281g001	map00071	map00071_20141011124126.png
Amino sugar and nucleotide sugar metabolism	2	hexosaminidase	ec:3.2.1.52	1	PDK_30s998691g002	map00520	map00520_20141011124208.png
Amino sugar and nucleotide sugar metabolism	2	fructokinase (phosphorylating)	ec:2.7.1.4	1	PDK_30s1154711g002	map00520	map00520_20141011124208.png
Amino sugar and nucleotide sugar metabolism	2	glucokinase (phosphorylating)	ec:2.7.1.2	1	PDK_30s1154711g002	map00520	map00520_20141011124208.png
Other glycan degradation	2	hexosaminidase	ec:3.2.1.52	1	PDK_30s998691g002	map00511	map00511_20141011124548.png
Other glycan degradation	2	psychosine hydrolase	ec:3.2.1.45	1	PDK_30s1030471g008	map00511	map00511_20141011124548.png
Retinol metabolism	2	1-monooxygenase	ec:1.14.15.3	1	PDK_30s1141931g002	map00830	map00830_20141011124552.png
Retinol metabolism	2	monooxygenase	ec:1.14.14.1	1	PDK_30s1141931g002	map00830	map00830_20141011124552.png
Retinol metabolism	2	dehydrogenase	ec:1.2.1.36	1	PDK_30s665281g001	map00830	map00830_20141011124552.png
Porphyrin and chlorophyll metabolism	2	reductase	ec:1.3.1.33	1	PDK_30s803881g001	map00860	map00860_20141011124608.png
Porphyrin and chlorophyll metabolism	2	decarboxylase	ec:4.1.1.37	1	PDK_30s952041g001	map00860	map00860_20141011124608.png
Porphyrin and chlorophyll metabolism	2	oxygenase	ec:1.14.13.122	1	PDK_30s803881g001	map00860	map00860_20141011124608.png
Drug metabolism - cytochrome P450	2	monooxygenase	ec:1.14.13.8	1	PDK_30s957931g002	map00982	map00982_20141011124851.png
Drug metabolism - cytochrome P450	2	monooxygenase	ec:1.14.14.1	1	PDK_30s1141931g002	map00982	map00982_20141011124851.png
Ascorbate and aldarate metabolism	2	dehydrogenase (NAD+)	ec:1.2.1.3	1	PDK_30s665281g001	map00053	map00053_20141011124907.png
Ascorbate and aldarate metabolism	2	reductase (NADH)	ec:1.6.5.4	1	PDK_30s856251g001	map00053	map00053_20141011124907.png
Glycerolipid metabolism	2	synthase	ec:2.4.1.46	1	PDK_30s814451g001	map00561	map00561_20141011125152.png
Glycerolipid metabolism	2	dehydrogenase (NAD+)	ec:1.2.1.3	1	PDK_30s665281g001	map00561	map00561_20141011125152.png
Cyanoamino acid metabolism	1	gentiobiase	ec:3.2.1.21	1	PDK_30s747721g001	map00460	map00460_20141011123701.png
Steroid hormone biosynthesis	1	monooxygenase	ec:1.14.14.1	1	PDK_30s1141931g002	map00140	map00140_20141011123710.png
Chloroalkane and chloroalkene degradation	1	dehydrogenase (NAD+)	ec:1.2.1.3	1	PDK_30s665281g001	map00625	map00625_20141011123745.png
Nitrogen metabolism	1	synthase (ferredoxin)	ec:1.4.7.1	1	PDK_30s1067401g004	map00910	map00910_20141011123801.png
Lysine biosynthesis	1	aminotransferase	ec:2.6.1.83	1	PDK_30s1036201g002	map00300	map00300_20141011123821.png
Arginine and proline metabolism	1	dehydrogenase (NAD+)	ec:1.2.1.3	1	PDK_30s665281g001	map00330	map00330_20141011123903.png
Synthesis and degradation of ketone bodies	1	lyase	ec:4.1.3.4	1	PDK_30s759711g003	map00072	map00072_20141011124032.png
Butirosin and neomycin biosynthesis	1	glucokinase (phosphorylating)	ec:2.7.1.2	1	PDK_30s1154711g002	map00524	map00524_20141011124130.png
Streptomycin biosynthesis	1	glucokinase (phosphorylating)	ec:2.7.1.2	1	PDK_30s1154711g002	map00521	map00521_20141011124138.png
Caffeine metabolism	1	monooxygenase	ec:1.14.14.1	1	PDK_30s1141931g002	map00232	map00232_20141011124219.png
Valine, leucine and isoleucine biosynthesis	1	synthase	ec:2.2.1.6	1	PDK_30s1122781g001	map00290	map00290_20141011124251.png
Zeatin biosynthesis	1	dehydrogenase	ec:1.5.99.12	1	PDK_30s928741g002	map00908	map00908_20141011124306.png
Riboflavin metabolism	1	phosphatase	ec:3.1.3.2	1	PDK_30s759641g001	map00740	map00740_20141011124329.png
mTOR signaling pathway	1	protein kinase	ec:2.7.11.24	1	PDK_30s983281g001	map04150	map04150_20141011124334.png
Pantothenate and CoA biosynthesis	1	synthase	ec:2.2.1.6	1	PDK_30s1122781g001	map00770	map00770_20141011124345.png
Selenocompound metabolism	1	adenylyltransferase	ec:2.7.7.4	1	PDK_30s986061g002	map00450	map00450_20141011124358.png
Limonene and pinene degradation	1	dehydrogenase (NAD+)	ec:1.2.1.3	1	PDK_30s665281g001	map00903	map00903_20141011124407.png
T cell receptor signaling pathway	1	phosphatase	ec:3.1.3.16	1	PDK_30s658831g002	map04660	map04660_20141011124444.png
Various types of N-glycan biosynthesis	1	hexosaminidase	ec:3.2.1.52	1	PDK_30s998691g002	map00513	map00513_20141011124537.png
Geraniol degradation	1	lyase	ec:4.1.3.4	1	PDK_30s759711g003	map00281	map00281_20141011124620.png
beta-Alanine metabolism	1	dehydrogenase (NAD+)	ec:1.2.1.3	1	PDK_30s665281g001	map00410	map00410_20141011124658.png
Glycosphingolipid biosynthesis - ganglio series	1	hexosaminidase	ec:3.2.1.52	1	PDK_30s998691g002	map00604	map00604_20141011124717.png
Glycosphingolipid biosynthesis - globo series	1	hexosaminidase	ec:3.2.1.52	1	PDK_30s998691g002	map00603	map00603_20141011124723.png
Sulfur metabolism	1	adenylyltransferase	ec:2.7.7.4	1	PDK_30s986061g002	map00920	map00920_20141011124744.png
Sphingolipid metabolism	1	psychosine hydrolase	ec:3.2.1.45	1	PDK_30s1030471g008	map00600	map00600_20141011124752.png
Lysine degradation	1	dehydrogenase (NAD+)	ec:1.2.1.3	1	PDK_30s665281g001	map00310	map00310_20141011124817.png
Glyoxylate and dicarboxylate metabolism	1	synthase (ferredoxin)	ec:1.4.7.1	1	PDK_30s1067401g004	map00630	map00630_20141011124839.png
Histidine metabolism	1	dehydrogenase (NAD+)	ec:1.2.1.3	1	PDK_30s665281g001	map00340	map00340_20141011124923.png
C5-Branched dibasic acid metabolism	1	synthase	ec:2.2.1.6	1	PDK_30s1122781g001	map00660	map00660_20141011124934.png
Citrate cycle (TCA cycle)	1	acetyltransferase	ec:2.3.1.12	1	PDK_30s970051g001	map00020	map00020_20141011124953.png
Metabolism of xenobiotics by cytochrome P450	1	monooxygenase	ec:1.14.14.1	1	PDK_30s1141931g002	map00980	map00980_20141011125002.png
Ether lipid metabolism	1	D	ec:3.1.4.4	1	PDK_30s820371g001	map00565	map00565_20141011125042.png
Glycosaminoglycan degradation	1	hexosaminidase	ec:3.2.1.52	1	PDK_30s998691g002	map00531	map00531_20141011125133.png
Linoleic acid metabolism	1	monooxygenase	ec:1.14.14.1	1	PDK_30s1141931g002	map00591	map00591_20141011125222.png
Arachidonic acid metabolism	1	1-monooxygenase	ec:1.14.15.3	1	PDK_30s1141931g002	map00590	map00590_20141011125229.png
Arachidonic acid metabolism	1	monooxygenase	ec:1.14.14.1	1	PDK_30s1141931g002	map00590	map00590_20141011125229.png
