# Supplementary material for: A genome-wide identification of the miRNAome in response to salinity stress in date palm (Phoenix dactylifera L.)
Source: Front Plant Sci. 2015 Nov 5;6:946. doi: 10.3389/fpls.2015.00946 (PMC4633500; doi:10.3389/fpls.2015.00946)
Supplement: Supplementary file 8 [file Table8.XLSX]

## Sheet: Sheet1
Table S8. Mapping of potential targets for miRNA isolated from P. dactylifera roots on some metabolic pathways using the Kyoto Encyclopedia of Genes and Genomes (KEGG).
Pathway	Seqs in Pathway	Enzyme	Ezyme ID	Seqs of Enzyme	Seqs	Pathway ID	Pathway Image
Phenylalanine metabolism	3	lactoperoxidase	ec:1.11.1.7	1	PDK_30s729641g001	map00360	map00360_20141010091453.png
Phenylalanine metabolism	3	hydrolase	ec:3.5.1.32	2	PDK_30s1106101g003, PDK_30s1006281g001	map00360	map00360_20141010091453.png
Butanoate metabolism	1	synthase	ec:2.2.1.6	1	PDK_30s1122781g001	map00650	map00650_20141010091427.png
Phenylpropanoid biosynthesis	3	dehydrogenase	ec:1.2.1.68	1	PDK_30s665281g001	map00940	map00940_20141010091408.png
Phenylpropanoid biosynthesis	3	gentiobiase	ec:3.2.1.21	1	PDK_30s747721g001	map00940	map00940_20141010091408.png
Phenylpropanoid biosynthesis	3	lactoperoxidase	ec:1.11.1.7	1	PDK_30s729641g001	map00940	map00940_20141010091408.png
Pentose and glucuronate interconversions	1	dehydrogenase (NAD+)	ec:1.2.1.3	1	PDK_30s665281g001	map00040	map00040_20141010091510.png
Arginine and proline metabolism	1	dehydrogenase (NAD+)	ec:1.2.1.3	1	PDK_30s665281g001	map00330	map00330_20141010091433.png
Pyruvate metabolism	1	dehydrogenase (NAD+)	ec:1.2.1.3	1	PDK_30s665281g001	map00620	map00620_20141010091403.png
Nitrogen metabolism	1	synthase (ferredoxin)	ec:1.4.7.1	1	PDK_30s1067401g004	map00910	map00910_20141010091352.png
Glycolysis / Gluconeogenesis	4	hydratase	ec:4.2.1.11	1	PDK_30s776781g006	map00010	map00010_20141010091421.png
Glycolysis / Gluconeogenesis	4	glucokinase (phosphorylating)	ec:2.7.1.2	1	PDK_30s1154711g002	map00010	map00010_20141010091421.png
Glycolysis / Gluconeogenesis	4	phosphohexokinase	ec:2.7.1.11	1	PDK_30s745071g002	map00010	map00010_20141010091421.png
Glycolysis / Gluconeogenesis	4	dehydrogenase (NAD+)	ec:1.2.1.3	1	PDK_30s665281g001	map00010	map00010_20141010091421.png
Lysine biosynthesis	1	aminotransferase	ec:2.6.1.83	1	PDK_30s1036201g002	map00300	map00300_20141010091357.png
Cyanoamino acid metabolism	1	gentiobiase	ec:3.2.1.21	1	PDK_30s747721g001	map00460	map00460_20141010091326.png
Glycerophospholipid metabolism	2	phosphodiesterase	ec:3.1.4.46	1	PDK_30s1077261g001	map00564	map00564_20141010091854.png
Glycerophospholipid metabolism	2	dehydrogenase [NAD(P)+]	ec:1.1.1.94	1	PDK_30s854261g002	map00564	map00564_20141010091854.png
Glycerophospholipid metabolism	2	dehydrogenase (NAD+)	ec:1.1.1.8	1	PDK_30s854261g002	map00564	map00564_20141010091854.png
Glycerolipid metabolism	2	dehydrogenase (NAD+)	ec:1.2.1.3	1	PDK_30s665281g001	map00561	map00561_20141010091911.png
Glycerolipid metabolism	2	synthase	ec:2.4.1.46	1	PDK_30s814451g001	map00561	map00561_20141010091911.png
Glycosaminoglycan degradation	1	hexosaminidase	ec:3.2.1.52	1	PDK_30s998691g002	map00531	map00531_20141010091905.png
Pyrimidine metabolism	2	DNA polymerase	ec:2.7.7.7	1	PDK_30s839611g001	map00240	map00240_20141010091917.png
Pyrimidine metabolism	2	RNA polymerase	ec:2.7.7.6	1	PDK_30s770751g001	map00240	map00240_20141010091917.png
Starch and sucrose metabolism	4	fructokinase (phosphorylating)	ec:2.7.1.4	1	PDK_30s1154711g002	map00500	map00500_20141010091901.png
Starch and sucrose metabolism	4	glucokinase (phosphorylating)	ec:2.7.1.2	1	PDK_30s1154711g002	map00500	map00500_20141010091901.png
Starch and sucrose metabolism	4	glycogenase	ec:3.2.1.1	1	PDK_30s821571g001	map00500	map00500_20141010091901.png
Starch and sucrose metabolism	4	gentiobiase	ec:3.2.1.21	1	PDK_30s747721g001	map00500	map00500_20141010091901.png
Starch and sucrose metabolism	4	phosphatase	ec:3.1.3.24	1	PDK_30s655081g010	map00500	map00500_20141010091901.png
Drug metabolism - cytochrome P450	1	monooxygenase	ec:1.14.13.8	1	PDK_30s957931g002	map00982	map00982_20141010091819.png
Ascorbate and aldarate metabolism	1	dehydrogenase (NAD+)	ec:1.2.1.3	1	PDK_30s665281g001	map00053	map00053_20141010091824.png
Glycosphingolipid biosynthesis - ganglio series	1	hexosaminidase	ec:3.2.1.52	1	PDK_30s998691g002	map00604	map00604_20141010091748.png
Galactose metabolism	2	glucokinase (phosphorylating)	ec:2.7.1.2	1	PDK_30s1154711g002	map00052	map00052_20141010091841.png
Galactose metabolism	2	phosphohexokinase	ec:2.7.1.11	1	PDK_30s745071g002	map00052	map00052_20141010091841.png
Glycosphingolipid biosynthesis - globo series	1	hexosaminidase	ec:3.2.1.52	1	PDK_30s998691g002	map00603	map00603_20141010091751.png
Fructose and mannose metabolism	3	fructokinase (phosphorylating)	ec:2.7.1.4	1	PDK_30s1154711g002	map00051	map00051_20141010091848.png
Fructose and mannose metabolism	3	isomerase	ec:5.3.1.6	1	PDK_30s1016851g001	map00051	map00051_20141010091848.png
Fructose and mannose metabolism	3	phosphohexokinase	ec:2.7.1.11	1	PDK_30s745071g002	map00051	map00051_20141010091848.png
Fructose and mannose metabolism	3	1-phosphotransferase	ec:2.7.1.90	1	PDK_30s745071g002	map00051	map00051_20141010091848.png
C5-Branched dibasic acid metabolism	1	synthase	ec:2.2.1.6	1	PDK_30s1122781g001	map00660	map00660_20141010091830.png
Histidine metabolism	1	dehydrogenase (NAD+)	ec:1.2.1.3	1	PDK_30s665281g001	map00340	map00340_20141010091836.png
Glyoxylate and dicarboxylate metabolism	1	synthase (ferredoxin)	ec:1.4.7.1	1	PDK_30s1067401g004	map00630	map00630_20141010091808.png
Sulfur metabolism	1	adenylyltransferase	ec:2.7.7.4	1	PDK_30s986061g002	map00920	map00920_20141010091802.png
Lysine degradation	1	dehydrogenase (NAD+)	ec:1.2.1.3	1	PDK_30s665281g001	map00310	map00310_20141010091814.png
Sphingolipid metabolism	1	psychosine hydrolase	ec:3.2.1.45	1	PDK_30s1030471g008	map00600	map00600_20141010091756.png
Thiamine metabolism	3	phosphatase	ec:3.6.1.15	3	PDK_30s925571g001, PDK_30s764411g002, PDK_30s915891g001	map00730	map00730_20141010091739.png
beta-Alanine metabolism	1	dehydrogenase (NAD+)	ec:1.2.1.3	1	PDK_30s665281g001	map00410	map00410_20141010091744.png
Various types of N-glycan biosynthesis	1	hexosaminidase	ec:3.2.1.52	1	PDK_30s998691g002	map00513	map00513_20141010091711.png
Zeatin biosynthesis	1	dehydrogenase	ec:1.5.99.12	1	PDK_30s928741g002	map00908	map00908_20141010091616.png
Valine, leucine and isoleucine degradation	1	dehydrogenase (NAD+)	ec:1.2.1.3	1	PDK_30s665281g001	map00280	map00280_20141010091733.png
Porphyrin and chlorophyll metabolism	1	oxygenase	ec:1.14.13.122	1	PDK_30s803881g001	map00860	map00860_20141010091726.png
Porphyrin and chlorophyll metabolism	1	reductase	ec:1.3.1.33	1	PDK_30s803881g001	map00860	map00860_20141010091726.png
Retinol metabolism	1	dehydrogenase	ec:1.2.1.36	1	PDK_30s665281g001	map00830	map00830_20141010091720.png
Other glycan degradation	2	hexosaminidase	ec:3.2.1.52	1	PDK_30s998691g002	map00511	map00511_20141010091716.png
Other glycan degradation	2	psychosine hydrolase	ec:3.2.1.45	1	PDK_30s1030471g008	map00511	map00511_20141010091716.png
Limonene and pinene degradation	1	dehydrogenase (NAD+)	ec:1.2.1.3	1	PDK_30s665281g001	map00903	map00903_20141010091644.png
Tryptophan metabolism	1	dehydrogenase (NAD+)	ec:1.2.1.3	1	PDK_30s665281g001	map00380	map00380_20141010091707.png
Pentose phosphate pathway	2	isomerase	ec:5.3.1.6	1	PDK_30s1016851g001	map00030	map00030_20141010091701.png
Pentose phosphate pathway	2	phosphohexokinase	ec:2.7.1.11	1	PDK_30s745071g002	map00030	map00030_20141010091701.png
Oxidative phosphorylation	2	oxidase	ec:1.9.3.1	2	PDK_30s765961g002, PDK_30s914621g001	map00190	map00190_20141010091650.png
Pantothenate and CoA biosynthesis	1	synthase	ec:2.2.1.6	1	PDK_30s1122781g001	map00770	map00770_20141010091633.png
Selenocompound metabolism	1	adenylyltransferase	ec:2.7.7.4	1	PDK_30s986061g002	map00450	map00450_20141010091639.png
Riboflavin metabolism	1	phosphatase	ec:3.1.3.2	1	PDK_30s759641g001	map00740	map00740_20141010091622.png
T cell receptor signaling pathway	1	phosphatase	ec:3.1.3.16	1	PDK_30s658831g002	map04660	map04660_20141010091654.png
Carbon fixation in photosynthetic organisms	1	isomerase	ec:5.3.1.6	1	PDK_30s1016851g001	map00710	map00710_20141010091612.png
Butirosin and neomycin biosynthesis	1	glucokinase (phosphorylating)	ec:2.7.1.2	1	PDK_30s1154711g002	map00524	map00524_20141010091534.png
Valine, leucine and isoleucine biosynthesis	1	synthase	ec:2.2.1.6	1	PDK_30s1122781g001	map00290	map00290_20141010091608.png
Aminobenzoate degradation	1	phosphatase	ec:3.1.3.2	1	PDK_30s759641g001	map00627	map00627_20141010091331.png
Streptomycin biosynthesis	1	glucokinase (phosphorylating)	ec:2.7.1.2	1	PDK_30s1154711g002	map00521	map00521_20141010091542.png
Purine metabolism	9	DNA polymerase	ec:2.7.7.7	1	PDK_30s839611g001	map00230	map00230_20141010091602.png
Purine metabolism	9	RNA polymerase	ec:2.7.7.6	1	PDK_30s770751g001	map00230	map00230_20141010091602.png
Purine metabolism	9	adenylpyrophosphatase	ec:3.6.1.3	3	PDK_30s655081g013, PDK_30s927361g003, PDK_30s1125961g002	map00230	map00230_20141010091602.png
Purine metabolism	9	adenylyltransferase	ec:2.7.7.4	1	PDK_30s986061g002	map00230	map00230_20141010091602.png
Purine metabolism	9	phosphatase	ec:3.6.1.15	3	PDK_30s925571g001, PDK_30s764411g002, PDK_30s915891g001	map00230	map00230_20141010091602.png
Amino sugar and nucleotide sugar metabolism	2	fructokinase (phosphorylating)	ec:2.7.1.4	1	PDK_30s1154711g002	map00520	map00520_20141010091553.png
Amino sugar and nucleotide sugar metabolism	2	glucokinase (phosphorylating)	ec:2.7.1.2	1	PDK_30s1154711g002	map00520	map00520_20141010091553.png
Amino sugar and nucleotide sugar metabolism	2	hexosaminidase	ec:3.2.1.52	1	PDK_30s998691g002	map00520	map00520_20141010091553.png
Chloroalkane and chloroalkene degradation	1	dehydrogenase (NAD+)	ec:1.2.1.3	1	PDK_30s665281g001	map00625	map00625_20141010091344.png
mTOR signaling pathway	1	protein kinase	ec:2.7.11.24	1	PDK_30s983281g001	map04150	map04150_20141010091626.png
Fatty acid degradation	1	dehydrogenase (NAD+)	ec:1.2.1.3	1	PDK_30s665281g001	map00071	map00071_20141010091530.png
Methane metabolism	2	hydratase	ec:4.2.1.11	1	PDK_30s776781g006	map00680	map00680_20141010091521.png
Methane metabolism	2	phosphohexokinase	ec:2.7.1.11	1	PDK_30s745071g002	map00680	map00680_20141010091521.png
Aminoacyl-tRNA biosynthesis	3	ligase	ec:6.1.1.14	1	PDK_30s1147711g001	map00970	map00970_20141010091414.png
Aminoacyl-tRNA biosynthesis	3	ligase	ec:6.1.1.5	1	PDK_30s888861g003	map00970	map00970_20141010091414.png
Aminoacyl-tRNA biosynthesis	3	ligase	ec:6.1.1.4	1	PDK_30s749061g001	map00970	map00970_20141010091414.png
