# Supplementary material for: A genome-wide identification of the miRNAome in response to salinity stress in date palm (Phoenix dactylifera L.)
Source: Front Plant Sci. 2015 Nov 5;6:946. doi: 10.3389/fpls.2015.00946 (PMC4633500; doi:10.3389/fpls.2015.00946)
Supplement: Supplementary file 16 [file Image8.PDF]

# STARCH AND SUCROSE METABOLISM

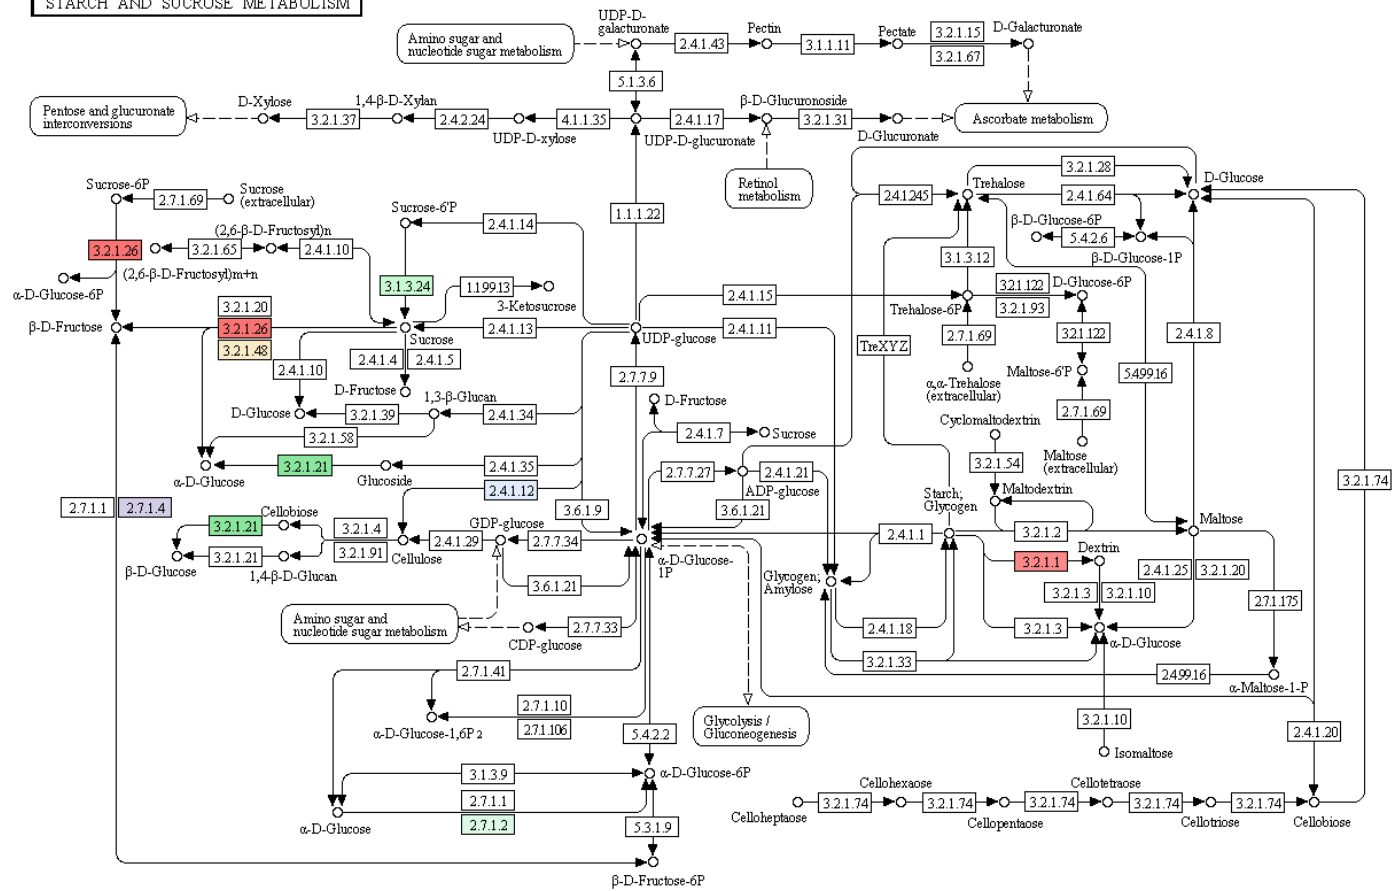

00500 6/7/13  
(c) Kanehisa Laboratories

**Figure S8.** Starch and sucrose metabolic pathways that show the position of potential targets for miRNA isolated from *P. dactylifera* leaves using the Kyoto Encyclopaedia of Genes and Genomes (KEGG).
